# Supplementary material for: Differential ERK activity shapes the epiblast methylome influencing cell-context response to germ-layer differentiation signals.
Source: Research Square preprint supplement (doi:10.21203/rs.3.rs-3092600/v1), 2023-06-26
Supplement: Supplementary file 1 [file Supplementary Data 1.xlsx]

## Sheet: Upregulated (CLDN6Low EpiSCs)
Gene name	Adjusted p-value
Vim	7.93658e-135
mt-Rnr1	6.60937e-109
mt-Nd4	9.437e-106
Cdh2	5.20395e-87
Zeb1	1.53723e-64
Sfrp1	2.0623e-64
Ncam1	3.63678e-64
Nuak1	7.96036e-63
Jcad	5.25657e-53
Gm23935	1.29951e-51
Fn1	5.51323e-48
Sox1	3.95628e-47
Ttc28	1.44979e-45
Egr1	5.24464e-44
Fbn2	3.14039e-41
Peg10	8.79189e-40
Kirrel	2.20641e-36
Fgfbp3	1.32034e-35
Insig1	2.34576e-34
Fstl1	5.98435e-34
Ghr	1.55911e-33
Tnc	1.19881e-29
Ckb	1.07499e-27
Fras1	1.12199e-25
Sh3pxd2b	1.59321e-25
Fbn1	2.4102e-25
Dlc1	4.5402e-24
Sox9	1.01417e-23
Epha4	1.36584e-23
Lix1l	1.61693e-23
Megf10	2.07803e-23
mt-Co1	1.19704e-22
Adamts10	1.41646e-22
Meis2	2.50129e-22
Afap1	2.6315e-22
Klf4	5.4008e-22
Colec12	8.56898e-22
Efnb1	8.79422e-22
Col1a2	9.16707e-22
Gm26917	3.89366e-21
Junb	5.65002e-21
Megf6	6.32595e-21
Rasa3	7.2725e-21
Zeb2	2.43037e-20
mt-Nd5	2.43037e-20
Dchs1	2.54479e-20
Sorcs1	3.05516e-20
Prex2	7.78204e-20
Gm15564	8.87288e-20
mt-Cytb	1.09022e-19
Sox4	1.27805e-19
Trim2	1.93615e-19
Prox1	1.0565e-18
Acss1	1.14134e-18
Dll1	1.61636e-18
Ppp1r1a	2.35879e-18
Egr2	5.68575e-18
Plce1	1.95489e-17
Capn2	2.06837e-17
Col4a2	2.83862e-17
Dmxl2	5.11136e-17
Lars2	7.63126e-17
Zmiz1	2.45227e-16
Trap1a	3.03935e-16
Radil	8.1276e-16
Car2	8.16902e-16
Nid1	8.43902e-16
Tspan2	1.65609e-15
Ank2	2.77975e-15
Ptn	2.94911e-15
Lrrc4b	1.16931e-14
Ebf1	1.60686e-14
Edil3	1.66271e-14
Sdk2	3.39231e-14
mt-Nd1	3.83499e-14
Rnf165	6.40668e-14
Specc1	7.90203e-14
Scrn1	1.25321e-13
Cacna1h	1.32401e-13
Crb2	2.21976e-13
Ets1	2.66221e-13
Col2a1	2.98961e-13
Spta1	4.38486e-13
Clcn2	5.04232e-13
Col4a1	5.80327e-13
Rgs2	6.50993e-13
Ssbp2	6.50993e-13
Gpm6a	8.12751e-13
Npas3	9.38117e-13
Heg1	1.04234e-12
Sema5b	1.50322e-12
mt-Nd2	2.42376e-12
Id2	3.40071e-12
Zfp536	6.14318e-12
Socs3	6.92226e-12
Etv1	1.02721e-11
Gpr153	1.12994e-11
Zc3hav1	1.27984e-11
Dtna	1.60996e-11
Zc3hav1l	2.007e-11
Col12a1	3.56121e-11
Pcdh11x	3.96393e-11
Nova1	4.59148e-11
Maml2	8.06289e-11
Isoc2a	9.1348e-11
Ptprt	9.17245e-11
Mex3b	1.25472e-10
Acta2	1.37706e-10
Fat3	2.4693e-10
Igfbp4	4.21707e-10
Trp53i11	4.66959e-10
Dact1	5.83882e-10
Adamts9	7.13701e-10
Csrnp1	7.94417e-10
Arid5b	9.06071e-10
Plxna2	9.38082e-10
Id3	1.02736e-09
Tet2	1.15885e-09
Lama4	1.30098e-09
Pmp22	1.50752e-09
Gnb4	1.50752e-09
Car3	1.83846e-09
Tet3	2.45414e-09
Ngfr	2.7017e-09
mt-Rnr2	2.84534e-09
Tppp3	2.9311e-09
Unc5a	3.69057e-09
Coro2b	4.52555e-09
Eml1	4.76235e-09
Cacna1a	5.3722e-09
Vstm2b	9.13342e-09
Id1	1.28803e-08
Xylt1	1.3309e-08
Sacs	1.45304e-08
Il11ra1	1.87806e-08
Id4	2.2348e-08
Tns1	2.23563e-08
Man1c1	2.80472e-08
Col1a1	3.6433e-08
Parp8	3.96223e-08
Ldb2	5.90405e-08
Mmp16	7.39533e-08
Adamtsl1	1.03742e-07
Cntln	1.06249e-07
Insm1	2.28861e-07
Csmd2	3.01858e-07
Plekho1	3.52443e-07
Npr2	4.12281e-07
Pcdh18	4.23356e-07
Pdzd2	4.67583e-07
Adam19	5.22463e-07
Pknox2	8.28502e-07
Itga1	8.52881e-07
mt-Nd6	9.91005e-07
Atp1a2	1.05158e-06
Megf9	1.06776e-06
Fbln2	1.30241e-06
Slitrk4	1.38555e-06
Soga3	1.38752e-06
Serpinb9	1.56008e-06
Fam71a	1.81694e-06
Spats2l	1.94485e-06
Sema6d	2.28905e-06
Scarf2	2.3441e-06
Sema3f	2.81954e-06
BC034090	2.91702e-06
Pde10a	3.37857e-06
mt-Tp	3.61081e-06
Cdk5r1	3.75692e-06
Nfia	3.9586e-06
Lifr	4.73434e-06
Gad2	4.93466e-06
Cd40	4.98961e-06
Map1b	5.77842e-06
Kcnh2	5.78757e-06
Aldh1l2	5.9079e-06
Cdh22	6.07588e-06
Gadd45g	6.42748e-06
Tnfaip2	7.46087e-06
Fhod3	7.81731e-06
Mn1	8.0668e-06
Irx3	1.27075e-05
Chrd	1.3081e-05
Aebp1	1.32159e-05
Ptprd	1.4122e-05
Nfib	1.7299e-05
Dpysl4	1.79184e-05
Dgkb	2.42908e-05
Sdc3	2.51307e-05
Gucy1a2	2.51307e-05
S1pr3	2.5605e-05
Jam3	3.04042e-05
Dach1	3.25704e-05
Cdh4	5.72669e-05
Nr1d1	5.89102e-05
Vsir	6.14933e-05
Ntn4	6.42783e-05
Piezo2	6.76407e-05
Sobp	7.32239e-05
Mir6236	7.63607e-05
Plat	0.000158866
Zkscan2	0.00018137
Sh3kbp1	0.000202584
Gpr37	0.000248214
CT010467.1	0.000269034
Atp11a	0.000307369
Dagla	0.000349667
Fkbp14	0.000361357
Trh	0.000416029
Notch4	0.000486716
Prkd1	0.000543807
Rnasel	0.000552692
Elf4	0.000589046
Emilin3	0.000626999
Vash1	0.000636537
Rflna	0.000692718
Nphp4	0.000702243
Nexn	0.000714161
Itpr2	0.000743251
Samd14	0.000791867
Itih5	0.000833944
Pdgfrb	0.000952459
Brsk2	0.0009656
Cdc42ep1	0.0012621
Ppm1e	0.00133547
Alox15	0.00139138
Grik4	0.00157338
Dok5	0.00160252
Ovgp1	0.00173397
Shisa3	0.00189586
Ncald	0.00233258
Pdzrn3	0.00359898

## Sheet: Upregulated (CLDN6High EpiSCs)
Gene name	Adjusted p-value
Cdh1	0
Cldn6	2.03756e-274
Cldn7	1.01824e-244
Esrp1	1.85069e-239
St14	2.14229e-182
Krt18	7.98824e-148
Espn	9.91015e-137
Mapk13	7.4578e-85
Crb3	1.51514e-78
Atp1b1	3.80872e-77
Epcam	3.0673e-69
Rab25	3.41643e-67
Tjp3	8.2374e-66
Rgl3	3.63678e-64
Ppl	1.0559e-59
Spint2	3.62918e-59
Erbb3	1.11736e-57
Bspry	1.76323e-52
Sfn	4.01818e-50
Podxl	1.30392e-49
Map7	1.66924e-48
Krt8	5.04496e-48
Galnt3	6.60011e-48
Nectin2	1.59729e-47
Ocln	1.72981e-43
Cdk1	8.9256e-42
Rnf128	4.93761e-40
Slc44a1	1.19443e-38
Nefl	1.9856e-38
Diaph1	4.70939e-37
Grhl2	2.68061e-36
Chst1	1.14888e-34
Lad1	3.10834e-34
Atp10d	6.20505e-33
Hpn	1.32482e-32
Dsp	2.90583e-32
Bcam	1.67277e-31
Tdrd5	1.70703e-31
Tnk1	2.88558e-31
Sptbn2	5.1234e-31
Gldc	2.21784e-30
B4galnt3	1.8953e-28
Stx3	3.96423e-28
Upp1	4.05287e-27
Spint1	4.87346e-27
Fam83e	5.5341e-27
Emb	6.54172e-27
Cdh3	8.47192e-27
Mal2	1.02147e-26
Patj	2.01981e-25
Platr14	2.73654e-24
Ppp4r4	3.92335e-24
Krt19	1.81483e-23
Marveld2	2.30262e-23
Plk5	4.95077e-22
Stk26	6.07745e-22
Thsd7a	7.49887e-22
Cldn4	8.44526e-22
Epha1	3.97555e-21
Ckmt1	9.53217e-21
Tes	1.1429e-20
Marveld3	3.48194e-20
Kdf1	1.27805e-19
Ccdc120	2.70099e-19
Rasd2	3.69671e-19
Chmp4c	7.7868e-19
Wwc1	9.01145e-19
Otx2	1.04707e-18
Dsc2	1.42113e-18
2610528J11Rik	2.46923e-18
Tmc4	2.99698e-17
Bahd1	1.61274e-16
Epb41l5	1.9949e-16
Polr3g	2.90384e-16
Kcnk1	3.63452e-16
Ybx2	3.72491e-16
Sh3gl2	4.82289e-16
F11r	6.0725e-16
Ripk4	1.51353e-15
Ahr	3.6142e-15
Arhgef16	4.71287e-15
Spon1	1.45952e-14
Prss8	1.56972e-14
Large2	3.79881e-14
Prrg4	3.87902e-14
Cblc	6.97817e-14
Zfp473	1.24486e-13
Itgb4	1.59102e-13
Cdc42bpg	2.6594e-13
Fut1	2.7684e-13
Ptk2b	6.64785e-13
AI661453	8.88168e-13
Cldn3	1.50411e-12
Wipf3	1.75088e-12
Helb	3.67605e-12
H2-Q2	3.82809e-12
Rbm47	5.56655e-12
Lmo7	6.44747e-12
Tmem59l	9.6958e-12
Dcxr	1.27984e-11
Dgka	1.404e-11
Snai3	1.63225e-11
Pdlim3	1.87594e-11
Rgs9bp	1.94428e-11
Plekhg3	2.98223e-11
Ccdc88c	3.28839e-11
Gng3	4.64641e-11
Scnn1a	1.32646e-10
Slc40a1	1.50811e-10
Grin1	2.23304e-10
Abhd11	2.46562e-10
Bmp7	2.77245e-10
Fam83b	3.12934e-10
Kbtbd11	3.60888e-10
Dmtn	3.74097e-10
Nudt19	4.52387e-10
Dsg2	4.73667e-10
Fgf5	5.51902e-10
Tnfrsf12a	1.15649e-09
Fgf4	2.77349e-09
Tmem125	3.56016e-09
Krtcap3	4.35058e-09
Zfp365	4.38818e-09
Dok2	7.93605e-09
Rassf6	1.0066e-08
Slc4a11	1.17034e-08
Gprc5c	1.43491e-08
Capg	1.76163e-08
Klc3	3.15577e-08
Atp2a3	4.69617e-08
Lypd6b	5.9036e-08
Cd68	7.92471e-08
Mpzl2	8.48399e-08
Usp2	1.14292e-07
Cd55	1.56701e-07
Padi3	1.86438e-07
Irf6	1.98771e-07
Pcsk1n	2.10029e-07
A830018L16Rik	2.86409e-07
Atf7ip2	4.14972e-07
Mctp2	1.24146e-06
Arhgef5	1.76791e-06
Slc28a1	2.21869e-06
Arrdc1	2.30769e-06
Dtx1	2.50483e-06
Pgr	2.81516e-06
Faap24	3.65284e-06
Myo5c	3.68403e-06
Retreg1	4.52253e-06
Adgrg1	5.79019e-06
Ptger4	7.14353e-06
Tdrp	9.05278e-06
Ano9	9.12854e-06
Foxi3	9.56156e-06
Samd10	1.30544e-05
Arhgef19	1.33098e-05
Rab15	1.48002e-05
Rfx5	1.54711e-05
Mfsd12	1.6419e-05
Cobl	1.72231e-05
Abcg1	1.94008e-05
Elmo3	2.11057e-05
Vwa2	2.24055e-05
Tmem200a	2.24527e-05
Usp43	2.76277e-05
Cxcl12	2.92879e-05
Fzd8	3.39169e-05
Slc5a5	3.82739e-05
Cdh24	4.28868e-05
Fabp3	4.36958e-05
Aifm3	6.66557e-05
Stard10	7.63607e-05
Artn	8.45582e-05
Traf3ip2	0.000114747
Rin1	0.000117348
Met	0.000151969
Ydjc	0.000153239
Cthrc1	0.000279834
Fgfr2	0.000284387
Derl3	0.000339418
Rgs11	0.000578253
Pls1	0.000723614
Klf8	0.000767969
Ets2	0.000783614
Cdc42ep3	0.00104168
Kirrel2	0.00113215
Dnmt3b	0.00218584
Grhl3	0.00254043
Ppm1h	0.00268174
Cpz	0.00268174
Rac3	0.00335225
Myl3	0.00372676
Cyp2s1	0.00412814
Tgfa	0.00425341
