# Supplementary material for: Differential ERK activity shapes the epiblast methylome influencing cell-context response to germ-layer differentiation signals.
Source: Research Square preprint supplement (doi:10.21203/rs.3.rs-3092600/v1), 2023-06-26
Supplement: Supplementary file 4 [file Supplementary Data 2.xlsx]

## Sheet: APS 24h_integrated datasets
p_val	avg_logFC	pct.1	pct.2	p_val_adj	cluster	gene
5.4853e-24	0.630067	1	1	1.09706e-20	DE	Calm1
7.12712e-21	1.02156	1	0.882	1.42542e-17	DE	Emb
6.65171e-20	0.873915	0.87	0.464	1.33034e-16	DE	Otx2
1.06261e-19	0.707263	0.852	0.464	2.12521e-16	DE	Cldn6
1.29151e-19	1.12872	0.722	0.243	2.58302e-16	DE	Sox17
1.6311e-19	0.869764	0.944	0.742	3.26221e-16	DE	Cd24a
5.79703e-19	0.497248	0.63	0.2	1.15941e-15	DE	Foxq1
1.14258e-17	0.564509	1	0.849	2.28517e-14	DE	Igfbp2
1.36353e-17	0.718536	0.796	0.434	2.72707e-14	DE	Foxa2
5.89079e-17	0.665825	0.963	0.729	1.17816e-13	DE	Krt8
9.72681e-17	0.781148	0.981	0.824	1.94536e-13	DE	Gsc
9.19617e-16	0.471733	0.833	0.499	1.83923e-12	DE	Flt1
9.976e-16	0.315047	1	1	1.9952e-12	DE	Ldha
1.0671e-15	0.731011	0.981	0.759	2.13419e-12	DE	Lhx1
5.47862e-14	1.24953	0.722	0.438	1.09572e-10	DE	Cer1
8.18264e-14	0.609508	0.852	0.629	1.63653e-10	DE	Ggct
2.88552e-13	0.493821	0.926	0.798	5.77103e-10	DE	Chchd10
8.67453e-13	0.463399	0.907	0.629	1.73491e-09	DE	Gata6
3.0673e-12	0.640164	0.815	0.615	6.13459e-09	DE	Fgf5
3.49382e-12	0.658379	0.926	0.724	6.98763e-09	DE	Krt18
4.24147e-12	0.518457	0.759	0.515	8.48294e-09	DE	Pkdcc
1.26173e-10	0.496095	0.944	0.849	2.52346e-07	DE	Sall4
1.29651e-10	0.48012	0.796	0.592	2.59303e-07	DE	Zc3hav1
2.94643e-10	0.288591	0.519	0.176	5.89285e-07	DE	Wipf3
8.95693e-10	0.444159	1	0.91	1.79139e-06	DE	Fgf8
2.6716e-09	0.394973	0.611	0.373	5.34321e-06	DE	Rab38
2.68731e-09	0.339014	0.963	0.745	5.37462e-06	DE	Eomes
5.10977e-09	0.364724	0.667	0.408	1.02195e-05	DE	Rgma
5.48442e-09	0.449593	0.87	0.735	1.09688e-05	DE	Apoe
1.3654e-08	0.315434	0.87	0.717	2.73079e-05	DE	Spint2
2.51136e-08	0.365995	0.963	0.921	5.02272e-05	DE	Snrpn
4.25901e-08	0.351014	1	0.975	8.51802e-05	DE	Upp1
4.64064e-08	0.259581	0.574	0.334	9.28128e-05	DE	Jakmip1
1.61286e-07	0.60908	0.833	0.779	0.000322572	DE	Dnmt3b
3.79615e-07	0.600082	0.685	0.559	0.00075923	DE	Podxl
5.02722e-07	0.30333	0.981	0.968	0.00100544	DE	Rbbp7
1.95038e-06	0.289755	0.574	0.385	0.00390075	DE	Grb7
4.89095e-06	0.31693	0.63	0.42	0.0097819	DE	Ntn1
9.21843e-06	0.286805	0.981	0.963	0.0184369	DE	Jpt1
1.8117e-05	0.30465	0.889	0.761	0.0362341	DE	Pmepa1
3.57782e-05	0.274246	0.685	0.552	0.0715565	DE	Nipsnap1
6.04418e-05	0.28589	0.667	0.527	0.120884	DE	Gfpt2
0.000140627	0.261674	0.907	0.75	0.281254	DE	Id3
0.000218711	0.350935	0.87	0.756	0.437422	DE	Dkk1
0.000266332	0.289216	0.944	0.847	0.532665	DE	Cyp26a1
0.00052191	0.283583	0.87	0.826	1	DE	Fkbp11
0.000752134	0.269914	0.63	0.525	1	DE	Cdh1
0.00100206	0.283743	0.907	0.84	1	DE	Gsta4
0.00170719	0.291588	0.648	0.529	1	DE	Cxcr4
5.33524e-43	0.715264	0.996	0.962	1.06705e-39	Anterior PS	T-Bra
1.72804e-35	1.06115	0.862	0.674	3.45607e-32	Anterior PS	Igfbp3
2.06402e-34	0.533863	0.996	0.942	4.12803e-31	Anterior PS	Psme2
2.17126e-29	0.470319	0.973	0.902	4.34251e-26	Anterior PS	Psme2b
1.98348e-26	0.665843	0.875	0.769	3.96696e-23	Anterior PS	Slc2a3
4.40657e-24	0.441926	1	0.992	8.81315e-21	Anterior PS	Bex1
1.49835e-22	0.487759	0.812	0.684	2.99669e-19	Anterior PS	Irf1
9.96993e-21	0.601554	1	0.99	1.99399e-17	Anterior PS	Vim
1.72037e-20	0.45331	0.737	0.561	3.44074e-17	Anterior PS	Gbp2
9.40191e-20	0.650039	0.786	0.657	1.88038e-16	Anterior PS	Sprr2a3
2.18617e-18	0.433432	0.804	0.677	4.37234e-15	Anterior PS	Klf5
9.28884e-18	0.370761	0.821	0.669	1.85777e-14	Anterior PS	Epha2
1.26918e-17	0.471334	0.763	0.627	2.53836e-14	Anterior PS	Epcam
1.27159e-17	0.492596	0.701	0.566	2.54318e-14	Anterior PS	Gbp2b
1.20736e-16	0.344893	0.978	0.935	2.41471e-13	Anterior PS	Glud1
2.82869e-15	0.389333	0.969	0.89	5.65738e-12	Anterior PS	Anxa5
3.65027e-15	0.433816	1	0.99	7.30054e-12	Anterior PS	Lgals1
3.06281e-14	0.312765	0.991	0.952	6.12563e-11	Anterior PS	Psme1
2.98053e-13	0.325458	0.955	0.93	5.96106e-10	Anterior PS	Psmb10
4.98937e-13	0.313214	0.978	0.932	9.97875e-10	Anterior PS	Fst
5.95271e-13	0.251214	0.647	0.514	1.19054e-09	Anterior PS	Sprr2a1
6.86906e-13	0.386285	0.938	0.895	1.37381e-09	Anterior PS	Slc2a1
4.94124e-12	0.350056	0.79	0.714	9.88248e-09	Anterior PS	Krt18
5.1091e-12	0.314988	0.812	0.719	1.02182e-08	Anterior PS	Anxa2
2.00742e-11	0.390526	0.576	0.434	4.01485e-08	Anterior PS	Mt2
7.0994e-11	0.457733	0.781	0.702	1.41988e-07	Anterior PS	Perp
1.42358e-10	0.275104	0.607	0.494	2.84715e-07	Anterior PS	Cdh1
1.45055e-10	0.322771	0.763	0.734	2.9011e-07	Anterior PS	Nodal
2.17201e-10	0.331556	0.728	0.642	4.34401e-07	Anterior PS	Sat1
5.48314e-10	0.317669	0.705	0.627	1.09663e-06	Anterior PS	L1td1
3.54924e-09	0.79775	0.643	0.556	7.09848e-06	Anterior PS	S100a6
4.50937e-09	0.315462	0.647	0.556	9.01875e-06	Anterior PS	Mt1
6.61861e-09	0.250374	0.696	0.642	1.32372e-05	Anterior PS	Sema6a
9.32787e-09	0.318721	0.67	0.579	1.86557e-05	Anterior PS	Psmb8
9.48333e-09	0.270311	0.643	0.569	1.89667e-05	Anterior PS	Tcea3
1.02119e-08	0.398423	0.701	0.629	2.04238e-05	Anterior PS	Clu
1.89694e-08	0.460071	0.629	0.526	3.79388e-05	Anterior PS	Nefl
1.98195e-08	0.371937	0.652	0.581	3.9639e-05	Anterior PS	Krt19
7.21024e-08	0.294271	0.518	0.409	0.000144205	Anterior PS	Tnfsf9
2.14067e-07	0.318144	0.933	0.917	0.000428134	Anterior PS	Cdkn1a
1.68916e-06	0.286494	0.67	0.629	0.00337832	Anterior PS	Tnfrsf12a
8.53567e-06	0.268682	0.723	0.689	0.0170713	Anterior PS	Nanog
1.28436e-05	0.3033	0.504	0.474	0.0256873	Anterior PS	Ccno
1.35165e-05	0.276955	0.768	0.739	0.0270331	Anterior PS	Krt8
3.59051e-05	0.300664	0.969	0.97	0.0718102	Anterior PS	Car2
0.000218284	0.276621	0.607	0.569	0.436568	Anterior PS	Hspb1
0.00055434	0.275743	0.862	0.872	1	Anterior PS	Stmn2
0.000638924	0.301801	0.679	0.657	1	Anterior PS	Mdm2
0.00080202	0.419408	0.531	0.521	1	Anterior PS	Sfn
0.00204651	0.277467	0.491	0.446	1	Anterior PS	Rtl8b
0.00827526	0.316805	0.594	0.584	1	Anterior PS	Txnip
3.23687e-27	0.692718	1	0.944	6.47374e-24	Nascent mesoderm	Phlda2
2.45682e-18	0.400578	1	0.969	4.91363e-15	Nascent mesoderm	Fn1
1.80615e-16	0.418408	0.978	0.813	3.61231e-13	Nascent mesoderm	Igfbp4
3.76698e-14	0.384024	0.949	0.778	7.53395e-11	Nascent mesoderm	Cabp1
1.43574e-10	0.270538	0.81	0.572	2.87148e-07	Nascent mesoderm	Plxna2
1.69378e-10	0.302737	0.971	0.885	3.38755e-07	Nascent mesoderm	Slc16a1
2.41616e-10	0.252614	0.869	0.689	4.83233e-07	Nascent mesoderm	Pea15a
3.26453e-10	0.266815	0.949	0.774	6.52906e-07	Nascent mesoderm	Ccnd1
4.06849e-10	0.253166	0.847	0.626	8.13699e-07	Nascent mesoderm	Efna3
6.24565e-10	0.290558	0.934	0.739	1.24913e-06	Nascent mesoderm	Snai1
1.48545e-09	0.277829	0.978	0.897	2.97089e-06	Nascent mesoderm	Aplp2
4.26602e-09	0.280142	0.854	0.671	8.53204e-06	Nascent mesoderm	Dpysl5
2.94286e-07	0.30649	0.839	0.745	0.000588573	Nascent mesoderm	Dkk1
8.36554e-33	0.751275	0.969	0.728	1.67311e-29	Cardiac mesoderm	Lhx1
5.37259e-27	0.516749	1	0.965	1.07452e-23	Cardiac mesoderm	Tdgf1
2.05008e-24	0.51198	0.824	0.443	4.10015e-21	Cardiac mesoderm	Frzb
4.20718e-24	0.537915	0.947	0.715	8.41435e-21	Cardiac mesoderm	Eomes
5.63548e-24	0.501875	1	0.972	1.1271e-20	Cardiac mesoderm	Upp1
1.80556e-19	0.849128	0.664	0.299	3.61112e-16	Cardiac mesoderm	Mesp1
2.83016e-16	0.486036	0.962	0.827	5.66032e-13	Cardiac mesoderm	Cyp26a1
6.37899e-16	0.450738	0.756	0.445	1.2758e-12	Cardiac mesoderm	Pim2
1.50586e-15	0.392723	1	0.97	3.01172e-12	Cardiac mesoderm	Fn1
5.69497e-14	0.410395	0.878	0.628	1.13899e-10	Cardiac mesoderm	Msx1
2.10423e-13	0.323126	0.969	0.764	4.20847e-10	Cardiac mesoderm	Rdh11
3.08629e-13	0.261632	0.87	0.596	6.17257e-10	Cardiac mesoderm	Gata6
2.10633e-12	0.383112	0.824	0.533	4.21267e-09	Cardiac mesoderm	Lmo1
3.61541e-12	0.280913	0.977	0.846	7.23083e-09	Cardiac mesoderm	Kifc2
3.86056e-12	0.344497	0.771	0.496	7.72112e-09	Cardiac mesoderm	Grrp1
5.08033e-11	0.293446	0.809	0.549	1.01607e-07	Cardiac mesoderm	Cdh11
5.20232e-11	0.308833	1	0.939	1.04046e-07	Cardiac mesoderm	Sp5
6.22381e-11	0.281961	0.992	0.963	1.24476e-07	Cardiac mesoderm	Car2
6.93091e-11	0.355254	0.908	0.75	1.38618e-07	Cardiac mesoderm	Dll3
1.83186e-10	0.274204	0.832	0.632	3.66371e-07	Cardiac mesoderm	Efna3
2.824e-10	0.291954	0.626	0.376	5.648e-07	Cardiac mesoderm	Dlc1
3.73725e-10	0.317421	1	0.957	7.4745e-07	Cardiac mesoderm	Mixl1
1.60113e-09	0.253532	0.985	0.896	3.20226e-06	Cardiac mesoderm	Aplp2
4.01621e-09	0.261782	0.565	0.305	8.03241e-06	Cardiac mesoderm	Kdr
1.78973e-08	0.295442	0.87	0.732	3.57946e-05	Cardiac mesoderm	Mthfd2
0.00996736	0.260887	0.458	0.366	1	Cardiac mesoderm	Chac1
5.53908e-29	0.983949	0.922	0.601	1.10782e-25	NMPs	Cited1
4.50892e-23	0.626673	0.935	0.621	9.01783e-20	NMPs	Wnt5a
8.17423e-22	0.765579	0.831	0.432	1.63485e-18	NMPs	Crabp1
2.35011e-21	0.548107	0.844	0.412	4.70023e-18	NMPs	Gbx2
4.45732e-20	0.541384	0.896	0.57	8.91464e-17	NMPs	Inka1
1.1787e-14	0.465877	0.935	0.815	2.3574e-11	NMPs	Smc6
6.62528e-14	0.36934	0.792	0.522	1.32506e-10	NMPs	Phlda1
1.78891e-12	0.323518	0.831	0.527	3.57783e-09	NMPs	Arl4d
7.7863e-12	0.513891	0.805	0.557	1.55726e-08	NMPs	Tbx6
1.43444e-11	0.49415	1	0.951	2.86888e-08	NMPs	Phlda2
2.08659e-11	0.364093	0.87	0.59	4.17319e-08	NMPs	Plxna2
1.17347e-10	0.289897	0.623	0.352	2.34694e-07	NMPs	Col1a2
4.9429e-10	0.461789	0.857	0.676	9.88579e-07	NMPs	Hoxb1
9.64052e-10	0.341369	0.935	0.76	1.9281e-06	NMPs	Snai1
1.84418e-09	0.386435	0.948	0.797	3.68836e-06	NMPs	Cabp1
3.54229e-09	0.278383	0.948	0.837	7.08459e-06	NMPs	Lamb1
1.69251e-08	0.276204	0.701	0.46	3.38503e-05	NMPs	Pcolce2
1.75058e-08	0.323768	0.701	0.485	3.50116e-05	NMPs	Pdlim4
4.32325e-07	0.34126	0.961	0.912	0.00086465	NMPs	Ifitm1
5.9733e-07	0.431624	1	0.96	0.00119466	NMPs	Lefty1
5.30089e-06	0.349081	0.805	0.707	0.0106018	NMPs	Id1
6.95323e-06	0.257207	0.831	0.69	0.0139065	NMPs	Klf13
7.48075e-06	0.315467	0.727	0.592	0.0149615	NMPs	Lmo2
5.92791e-05	0.285619	0.831	0.678	0.118558	NMPs	Eci2
0.000335648	0.275376	0.662	0.524	0.671296	NMPs	Cdc42ep4
