# Supplementary material for: Differential ERK activity shapes the epiblast methylome influencing cell-context response to germ-layer differentiation signals.
Source: Research Square preprint supplement (doi:10.21203/rs.3.rs-3092600/v1), 2023-06-26
Supplement: Supplementary file 7 [file Supplementary Data 3.xlsx]

## Sheet: top100_in vitro_in vivo_markers
	p_val	avg_logFC	pct.1	pct.2	p_val_adj	cluster	gene
1	9.82583e-250	1.68711	1	0.585	1.96517e-246	EpiSCs_1 (CLDN6High EpiSCs)	Gm8420
2	4.52812e-243	1.59703	0.998	0.562	9.05624e-240	EpiSCs_1 (CLDN6High EpiSCs)	Gm14094
3	8.90954e-240	1.25512	1	0.986	1.78191e-236	EpiSCs_1 (CLDN6High EpiSCs)	Gm10036
4	7.55876e-238	1.24499	1	0.986	1.51175e-234	EpiSCs_1 (CLDN6High EpiSCs)	Rps3a3
5	6.23586e-232	1.0738	1	1	1.24717e-228	EpiSCs_1 (CLDN6High EpiSCs)	Gm11942
6	1.52405e-227	1.45054	0.998	0.67	3.0481e-224	EpiSCs_1 (CLDN6High EpiSCs)	Gm5292
7	2.60055e-216	1.09671	1	0.985	5.2011e-213	EpiSCs_1 (CLDN6High EpiSCs)	Rps13-ps1
8	8.92354e-216	1.32545	0.988	0.627	1.78471e-212	EpiSCs_1 (CLDN6High EpiSCs)	Chchd10
9	6.97907e-201	1.13458	0.979	0.531	1.39581e-197	EpiSCs_1 (CLDN6High EpiSCs)	Gm8885
10	4.65488e-194	1.18198	0.986	0.449	9.30976e-191	EpiSCs_1 (CLDN6High EpiSCs)	Utf1
11	9.38366e-191	1.17802	0.981	0.733	1.87673e-187	EpiSCs_1 (CLDN6High EpiSCs)	Hmgcs1
12	1.3701e-183	1.02743	0.981	0.746	2.74021e-180	EpiSCs_1 (CLDN6High EpiSCs)	Asns
13	1.31456e-161	1.03886	0.899	0.383	2.62913e-158	EpiSCs_1 (CLDN6High EpiSCs)	Txnip
14	1.4211e-160	0.689902	0.814	0.296	2.8422e-157	EpiSCs_1 (CLDN6High EpiSCs)	1700019D03Rik
15	8.46392e-153	0.711866	0.984	0.869	1.69278e-149	EpiSCs_1 (CLDN6High EpiSCs)	Glo1
16	8.19888e-152	0.832914	0.942	0.546	1.63978e-148	EpiSCs_1 (CLDN6High EpiSCs)	Fdft1
17	3.99541e-147	0.82165	0.899	0.446	7.99082e-144	EpiSCs_1 (CLDN6High EpiSCs)	Rras
18	2.40169e-137	0.761645	0.823	0.282	4.80339e-134	EpiSCs_1 (CLDN6High EpiSCs)	Enpp3
19	8.15488e-137	0.572256	0.777	0.255	1.63098e-133	EpiSCs_1 (CLDN6High EpiSCs)	Chst1
20	9.8277e-132	0.630125	0.792	0.288	1.96554e-128	EpiSCs_1 (CLDN6High EpiSCs)	Aldoc
21	3.15915e-131	0.737806	0.893	0.43	6.31829e-128	EpiSCs_1 (CLDN6High EpiSCs)	Cox6b2
22	2.22497e-128	0.665729	0.992	0.939	4.44995e-125	EpiSCs_1 (CLDN6High EpiSCs)	Tuba1a
23	8.96847e-127	0.764105	0.955	0.751	1.79369e-123	EpiSCs_1 (CLDN6High EpiSCs)	Pycr2
24	5.14107e-125	0.799343	0.975	0.755	1.02821e-121	EpiSCs_1 (CLDN6High EpiSCs)	Slc2a3
25	8.31493e-125	0.964996	0.872	0.517	1.66299e-121	EpiSCs_1 (CLDN6High EpiSCs)	Stmn2
26	2.00134e-117	0.703732	0.942	0.805	4.00269e-114	EpiSCs_1 (CLDN6High EpiSCs)	Psat1
27	9.89951e-115	0.666688	0.986	0.956	1.9799e-111	EpiSCs_1 (CLDN6High EpiSCs)	2410006H16Rik
28	4.1987e-113	0.860526	0.825	0.342	8.3974e-110	EpiSCs_1 (CLDN6High EpiSCs)	Lefty1
29	6.34645e-107	0.759467	0.975	0.894	1.26929e-103	EpiSCs_1 (CLDN6High EpiSCs)	Tpm1
30	7.2855e-107	0.447499	0.73	0.32	1.4571e-103	EpiSCs_1 (CLDN6High EpiSCs)	Crb3
31	1.32522e-106	0.667633	0.841	0.423	2.65043e-103	EpiSCs_1 (CLDN6High EpiSCs)	Cyp51
32	4.69232e-106	0.46986	0.656	0.174	9.38464e-103	EpiSCs_1 (CLDN6High EpiSCs)	Mef2b
33	4.50379e-103	0.523763	0.718	0.23	9.00758e-100	EpiSCs_1 (CLDN6High EpiSCs)	Kif1a
34	5.99984e-101	0.694565	0.953	0.695	1.19997e-97	EpiSCs_1 (CLDN6High EpiSCs)	Epcam
35	2.20136e-96	0.623476	0.792	0.37	4.40272e-93	EpiSCs_1 (CLDN6High EpiSCs)	Msmo1
36	5.68085e-96	0.578806	0.8	0.378	1.13617e-92	EpiSCs_1 (CLDN6High EpiSCs)	Dhcr7
37	1.69284e-94	0.680841	0.887	0.567	3.38569e-91	EpiSCs_1 (CLDN6High EpiSCs)	Psrc1
38	2.60182e-93	0.611523	0.959	0.815	5.20364e-90	EpiSCs_1 (CLDN6High EpiSCs)	Ly6e
39	2.69255e-93	0.640128	0.866	0.581	5.3851e-90	EpiSCs_1 (CLDN6High EpiSCs)	Psph
40	3.05138e-93	0.483115	0.732	0.275	6.10277e-90	EpiSCs_1 (CLDN6High EpiSCs)	Igfbp3
41	2.46326e-86	0.532984	0.715	0.279	4.92653e-83	EpiSCs_1 (CLDN6High EpiSCs)	Uchl1
42	4.61839e-86	0.340977	0.59	0.148	9.23678e-83	EpiSCs_1 (CLDN6High EpiSCs)	H2-Bl
43	9.84702e-86	0.432312	0.697	0.271	1.9694e-82	EpiSCs_1 (CLDN6High EpiSCs)	Cystm1
44	1.07568e-85	0.566998	0.868	0.588	2.15137e-82	EpiSCs_1 (CLDN6High EpiSCs)	Phc1
45	1.59534e-84	0.525818	0.821	0.437	3.19068e-81	EpiSCs_1 (CLDN6High EpiSCs)	Akap12
46	1.6435e-84	0.518428	0.767	0.34	3.28701e-81	EpiSCs_1 (CLDN6High EpiSCs)	Slc7a3
47	4.92579e-83	0.563778	0.806	0.456	9.85158e-80	EpiSCs_1 (CLDN6High EpiSCs)	Cdk6
48	7.0489e-80	0.503312	0.903	0.599	1.40978e-76	EpiSCs_1 (CLDN6High EpiSCs)	Lgals1
49	6.89466e-79	0.5459	0.788	0.4	1.37893e-75	EpiSCs_1 (CLDN6High EpiSCs)	Stard4
50	1.65415e-77	0.439933	0.682	0.318	3.30831e-74	EpiSCs_1 (CLDN6High EpiSCs)	Hif3a
51	4.2187e-75	0.409574	0.691	0.31	8.4374e-72	EpiSCs_1 (CLDN6High EpiSCs)	Ell2
52	1.95873e-74	0.55462	0.885	0.647	3.91746e-71	EpiSCs_1 (CLDN6High EpiSCs)	Ftl1
53	1.20823e-73	0.534116	0.928	0.834	2.41646e-70	EpiSCs_1 (CLDN6High EpiSCs)	Slc3a2
54	6.6987e-73	0.511738	0.794	0.464	1.33974e-69	EpiSCs_1 (CLDN6High EpiSCs)	Pck2
55	9.45602e-73	0.466657	0.948	0.75	1.8912e-69	EpiSCs_1 (CLDN6High EpiSCs)	Tagln2
56	2.49289e-71	0.509697	0.882	0.637	4.98579e-68	EpiSCs_1 (CLDN6High EpiSCs)	Tubb6
57	7.91981e-71	0.537688	0.779	0.458	1.58396e-67	EpiSCs_1 (CLDN6High EpiSCs)	Pmvk
58	2.021e-69	0.436694	0.701	0.305	4.04199e-66	EpiSCs_1 (CLDN6High EpiSCs)	Ccng1
59	2.79906e-68	0.456072	0.738	0.44	5.59813e-65	EpiSCs_1 (CLDN6High EpiSCs)	Slc39a8
60	1.55475e-67	0.308525	0.61	0.247	3.1095e-64	EpiSCs_1 (CLDN6High EpiSCs)	Bhlhe40
61	1.69654e-66	0.488536	0.932	0.775	3.39308e-63	EpiSCs_1 (CLDN6High EpiSCs)	Rbpms2
62	3.03263e-66	0.54908	0.691	0.326	6.06525e-63	EpiSCs_1 (CLDN6High EpiSCs)	Pitx2
63	2.15258e-63	0.556053	0.957	0.854	4.30517e-60	EpiSCs_1 (CLDN6High EpiSCs)	Apoe
64	3.14383e-62	0.440352	0.746	0.445	6.28766e-59	EpiSCs_1 (CLDN6High EpiSCs)	Tpd52
65	4.00949e-62	0.290496	0.563	0.205	8.01899e-59	EpiSCs_1 (CLDN6High EpiSCs)	Pipox
66	1.47817e-61	0.289292	0.918	0.68	2.95634e-58	EpiSCs_1 (CLDN6High EpiSCs)	Krt18
67	1.95464e-60	0.443585	0.955	0.881	3.90927e-57	EpiSCs_1 (CLDN6High EpiSCs)	Scd2
68	1.97045e-60	0.566984	0.839	0.611	3.94089e-57	EpiSCs_1 (CLDN6High EpiSCs)	Cth
69	4.52526e-60	0.37513	0.643	0.262	9.05053e-57	EpiSCs_1 (CLDN6High EpiSCs)	Tdrkh
70	9.04258e-60	0.467857	0.963	0.782	1.80852e-56	EpiSCs_1 (CLDN6High EpiSCs)	Igfbp2
71	3.6319e-59	0.429269	0.736	0.408	7.26379e-56	EpiSCs_1 (CLDN6High EpiSCs)	Mvd
72	3.66713e-59	0.481487	0.718	0.382	7.33427e-56	EpiSCs_1 (CLDN6High EpiSCs)	Lss
73	5.95852e-58	0.399961	0.567	0.187	1.1917e-54	EpiSCs_1 (CLDN6High EpiSCs)	Ramp3
74	6.43163e-58	0.313944	0.666	0.401	1.28633e-54	EpiSCs_1 (CLDN6High EpiSCs)	Gadd45b
75	4.69776e-55	0.527998	0.656	0.273	9.39552e-52	EpiSCs_1 (CLDN6High EpiSCs)	Nefl
76	6.58904e-55	0.510131	0.81	0.534	1.31781e-51	EpiSCs_1 (CLDN6High EpiSCs)	Nanog
77	4.8812e-52	0.458418	0.868	0.728	9.76241e-49	EpiSCs_1 (CLDN6High EpiSCs)	Ppp1r2
78	7.46609e-51	0.443646	0.715	0.42	1.49322e-47	EpiSCs_1 (CLDN6High EpiSCs)	Fdps
79	3.91468e-50	0.330254	0.579	0.238	7.82936e-47	EpiSCs_1 (CLDN6High EpiSCs)	Kcnj3
80	1.67996e-49	0.284765	0.571	0.217	3.35992e-46	EpiSCs_1 (CLDN6High EpiSCs)	Clu
81	6.30499e-48	0.416391	0.674	0.371	1.261e-44	EpiSCs_1 (CLDN6High EpiSCs)	Notch3
82	1.09445e-47	0.436615	0.901	0.764	2.1889e-44	EpiSCs_1 (CLDN6High EpiSCs)	Gsta4
83	3.67671e-46	0.483235	0.829	0.597	7.35342e-43	EpiSCs_1 (CLDN6High EpiSCs)	Pmm1
84	2.26152e-45	0.359708	0.833	0.566	4.52304e-42	EpiSCs_1 (CLDN6High EpiSCs)	Crip2
85	2.29938e-45	0.365836	0.596	0.273	4.59876e-42	EpiSCs_1 (CLDN6High EpiSCs)	Dcxr
86	6.03249e-45	0.389131	0.755	0.431	1.2065e-41	EpiSCs_1 (CLDN6High EpiSCs)	AA465934
87	2.08298e-39	0.332016	0.703	0.459	4.16595e-36	EpiSCs_1 (CLDN6High EpiSCs)	Cldn7
88	5.96469e-39	0.333434	0.588	0.269	1.19294e-35	EpiSCs_1 (CLDN6High EpiSCs)	Trap1a
89	2.50715e-37	0.285911	0.511	0.215	5.0143e-34	EpiSCs_1 (CLDN6High EpiSCs)	Sox3
90	8.12449e-37	0.333681	0.909	0.798	1.6249e-33	EpiSCs_1 (CLDN6High EpiSCs)	Cox7c-ps1
91	1.15113e-36	0.443429	0.984	0.972	2.30225e-33	EpiSCs_1 (CLDN6High EpiSCs)	Malat1
92	1.6708e-36	0.368182	0.839	0.741	3.34159e-33	EpiSCs_1 (CLDN6High EpiSCs)	Mthfd2
93	1.81331e-35	0.331772	0.843	0.653	3.62661e-32	EpiSCs_1 (CLDN6High EpiSCs)	Cd63
94	2.16964e-34	0.290367	0.742	0.464	4.33927e-31	EpiSCs_1 (CLDN6High EpiSCs)	Hmgcr
95	8.63974e-32	0.324595	0.802	0.621	1.72795e-28	EpiSCs_1 (CLDN6High EpiSCs)	Pdlim7
96	6.08069e-31	0.290392	0.674	0.426	1.21614e-27	EpiSCs_1 (CLDN6High EpiSCs)	Tspan13
97	3.43187e-24	0.326172	0.979	0.978	6.86375e-21	EpiSCs_1 (CLDN6High EpiSCs)	Eno1
98	2.7025e-23	0.287674	0.738	0.567	5.405e-20	EpiSCs_1 (CLDN6High EpiSCs)	Ajuba
99	6.82702e-20	0.315645	0.534	0.306	1.3654e-16	EpiSCs_1 (CLDN6High EpiSCs)	Cdkn1a
100	2.94954e-18	0.327155	0.728	0.612	5.89907e-15	EpiSCs_1 (CLDN6High EpiSCs)	Nusap1
101	2.56542e-118	1.69063	1	0.556	5.13084e-115	EpiSCs_2 (CLDN6Mid EpiSCs)	Pim2
102	5.42827e-103	1.15279	0.95	0.308	1.08565e-99	EpiSCs_2 (CLDN6Mid EpiSCs)	Ddit4
103	1.05341e-102	1.35501	0.995	0.494	2.10682e-99	EpiSCs_2 (CLDN6Mid EpiSCs)	Utf1
104	3.47542e-96	1.02475	1	0.986	6.95083e-93	EpiSCs_2 (CLDN6Mid EpiSCs)	Rps13-ps1
105	4.67054e-91	1.58568	0.98	0.604	9.34108e-88	EpiSCs_2 (CLDN6Mid EpiSCs)	Mt2
106	1.12704e-86	0.809984	0.787	0.208	2.25409e-83	EpiSCs_2 (CLDN6Mid EpiSCs)	Ier3
107	3.5289e-84	0.879899	1	1	7.0578e-81	EpiSCs_2 (CLDN6Mid EpiSCs)	Gm11942
108	9.84303e-84	0.810922	0.936	0.322	1.96861e-80	EpiSCs_2 (CLDN6Mid EpiSCs)	Enpp3
109	4.50451e-82	1.40949	1	0.67	9.00901e-79	EpiSCs_2 (CLDN6Mid EpiSCs)	Rps25
110	9.75477e-81	1.02948	1	0.568	1.95095e-77	EpiSCs_2 (CLDN6Mid EpiSCs)	Rps25-ps1
111	1.02473e-80	1.05223	1	0.568	2.04945e-77	EpiSCs_2 (CLDN6Mid EpiSCs)	Gm2225
112	1.48292e-80	1.18075	1	0.581	2.96584e-77	EpiSCs_2 (CLDN6Mid EpiSCs)	Gm6988
113	2.02089e-79	0.799807	1	0.993	4.04179e-76	EpiSCs_2 (CLDN6Mid EpiSCs)	Rps24
114	5.25755e-79	0.943276	1	0.988	1.05151e-75	EpiSCs_2 (CLDN6Mid EpiSCs)	Gm10036
115	2.06253e-74	1.08053	1	0.599	4.12506e-71	EpiSCs_2 (CLDN6Mid EpiSCs)	Gm14094
116	2.1508e-74	1.02194	1	0.698	4.3016e-71	EpiSCs_2 (CLDN6Mid EpiSCs)	Gm5292
117	2.17538e-74	0.914316	1	0.987	4.35076e-71	EpiSCs_2 (CLDN6Mid EpiSCs)	Rps3a3
118	3.22322e-74	0.887613	0.881	0.369	6.44645e-71	EpiSCs_2 (CLDN6Mid EpiSCs)	Slc7a3
119	5.27389e-74	1.14274	1	0.621	1.05478e-70	EpiSCs_2 (CLDN6Mid EpiSCs)	Gm8420
120	1.56541e-73	0.794428	0.99	0.732	3.13081e-70	EpiSCs_2 (CLDN6Mid EpiSCs)	Ppp1r2
121	1.60017e-68	0.608397	0.748	0.216	3.20034e-65	EpiSCs_2 (CLDN6Mid EpiSCs)	Trib3
122	6.90695e-68	0.680946	0.995	0.878	1.38139e-64	EpiSCs_2 (CLDN6Mid EpiSCs)	Glo1
123	1.67319e-66	1.16525	0.97	0.641	3.34639e-63	EpiSCs_2 (CLDN6Mid EpiSCs)	Rps4x
124	7.43723e-65	1.08768	0.921	0.527	1.48745e-61	EpiSCs_2 (CLDN6Mid EpiSCs)	Mt1
125	7.91912e-63	0.722373	0.995	0.765	1.58382e-59	EpiSCs_2 (CLDN6Mid EpiSCs)	Gm9320
126	1.23161e-62	0.637123	0.985	0.814	2.46322e-59	EpiSCs_2 (CLDN6Mid EpiSCs)	Psat1
127	4.30238e-62	0.886666	0.926	0.547	8.60477e-59	EpiSCs_2 (CLDN6Mid EpiSCs)	Gm9616
128	3.90458e-59	0.681865	0.965	0.649	7.80916e-56	EpiSCs_2 (CLDN6Mid EpiSCs)	Sec61g
129	4.62422e-58	0.478556	0.649	0.257	9.24844e-55	EpiSCs_2 (CLDN6Mid EpiSCs)	Gm44078
130	1.38338e-57	0.765531	0.995	0.773	2.76677e-54	EpiSCs_2 (CLDN6Mid EpiSCs)	Slc2a3
131	1.00557e-56	0.584359	0.738	0.27	2.01114e-53	EpiSCs_2 (CLDN6Mid EpiSCs)	Bhlhe40
132	1.93895e-56	0.641378	0.95	0.632	3.8779e-53	EpiSCs_2 (CLDN6Mid EpiSCs)	Sf3b6
133	1.12883e-55	0.519994	0.713	0.211	2.25767e-52	EpiSCs_2 (CLDN6Mid EpiSCs)	Ramp3
134	5.42524e-55	0.650772	0.98	0.808	1.08505e-51	EpiSCs_2 (CLDN6Mid EpiSCs)	Adk
135	9.86627e-55	0.65941	0.985	0.885	1.97325e-51	EpiSCs_2 (CLDN6Mid EpiSCs)	Scd2
136	1.0807e-54	0.637129	0.881	0.487	2.1614e-51	EpiSCs_2 (CLDN6Mid EpiSCs)	Pck2
137	3.94938e-54	0.726788	0.98	0.754	7.89876e-51	EpiSCs_2 (CLDN6Mid EpiSCs)	Hmgcs1
138	7.23225e-54	0.734146	0.678	0.16	1.44645e-50	EpiSCs_2 (CLDN6Mid EpiSCs)	Chac1
139	9.42251e-54	0.606504	0.941	0.607	1.8845e-50	EpiSCs_2 (CLDN6Mid EpiSCs)	Phc1
140	2.37671e-53	0.772967	1	0.972	4.75342e-50	EpiSCs_2 (CLDN6Mid EpiSCs)	Malat1
141	1.04082e-52	0.630451	0.871	0.48	2.08164e-49	EpiSCs_2 (CLDN6Mid EpiSCs)	Hmgcr
142	4.49088e-52	0.604993	0.985	0.658	8.98175e-49	EpiSCs_2 (CLDN6Mid EpiSCs)	Chchd10
143	8.83648e-52	0.672719	0.955	0.712	1.7673e-48	EpiSCs_2 (CLDN6Mid EpiSCs)	Mkrn1
144	4.32599e-50	0.61741	0.975	0.766	8.65199e-47	EpiSCs_2 (CLDN6Mid EpiSCs)	Asns
145	6.62206e-50	0.662408	1	0.851	1.32441e-46	EpiSCs_2 (CLDN6Mid EpiSCs)	Rps27rt
146	3.46486e-49	0.613265	0.936	0.654	6.92972e-46	EpiSCs_2 (CLDN6Mid EpiSCs)	Tubb6
147	1.31644e-48	0.64548	1	0.941	2.63287e-45	EpiSCs_2 (CLDN6Mid EpiSCs)	Rps27
148	1.89451e-48	0.559202	0.96	0.571	3.78902e-45	EpiSCs_2 (CLDN6Mid EpiSCs)	Gm8885
149	2.57616e-48	0.638633	0.955	0.769	5.15231e-45	EpiSCs_2 (CLDN6Mid EpiSCs)	Pycr2
150	5.05244e-48	0.515	1	0.974	1.01049e-44	EpiSCs_2 (CLDN6Mid EpiSCs)	Rps27a-ps3
151	7.16436e-48	0.42849	0.703	0.259	1.43287e-44	EpiSCs_2 (CLDN6Mid EpiSCs)	Kcnj3
152	3.36056e-47	0.627317	0.911	0.603	6.72112e-44	EpiSCs_2 (CLDN6Mid EpiSCs)	Psph
153	1.76359e-46	0.405373	1	0.998	3.52719e-43	EpiSCs_2 (CLDN6Mid EpiSCs)	Rps27a
154	3.32898e-46	0.553065	0.876	0.467	6.65796e-43	EpiSCs_2 (CLDN6Mid EpiSCs)	Akap12
155	3.43481e-46	0.500534	0.802	0.383	6.86962e-43	EpiSCs_2 (CLDN6Mid EpiSCs)	Pdk1
156	2.06135e-45	0.555327	0.936	0.643	4.1227e-42	EpiSCs_2 (CLDN6Mid EpiSCs)	Snrpb2
157	8.52125e-45	0.785298	0.847	0.382	1.70425e-41	EpiSCs_2 (CLDN6Mid EpiSCs)	Lefty1
158	1.00754e-44	0.498964	0.693	0.316	2.01509e-41	EpiSCs_2 (CLDN6Mid EpiSCs)	Ankrd37
159	1.76155e-44	0.495014	0.748	0.339	3.52311e-41	EpiSCs_2 (CLDN6Mid EpiSCs)	Ell2
160	2.09015e-44	0.480434	0.782	0.334	4.18031e-41	EpiSCs_2 (CLDN6Mid EpiSCs)	Ccng1
161	3.38533e-44	0.48013	0.96	0.579	6.77067e-41	EpiSCs_2 (CLDN6Mid EpiSCs)	Fdft1
162	3.18211e-43	0.72131	0.886	0.546	6.36422e-40	EpiSCs_2 (CLDN6Mid EpiSCs)	Stmn2
163	4.48982e-43	0.481803	0.738	0.289	8.97963e-40	EpiSCs_2 (CLDN6Mid EpiSCs)	Tdrkh
164	7.1965e-43	0.561277	0.98	0.957	1.4393e-39	EpiSCs_2 (CLDN6Mid EpiSCs)	Atf4
165	6.7174e-42	0.511852	1	0.943	1.34348e-38	EpiSCs_2 (CLDN6Mid EpiSCs)	Tuba1a
166	8.13097e-42	0.474314	0.822	0.413	1.62619e-38	EpiSCs_2 (CLDN6Mid EpiSCs)	Dhcr7
167	9.71911e-42	0.477386	0.752	0.333	1.94382e-38	EpiSCs_2 (CLDN6Mid EpiSCs)	Aldoc
168	2.1859e-41	0.615835	0.792	0.402	4.37179e-38	EpiSCs_2 (CLDN6Mid EpiSCs)	Egln3
169	3.36193e-41	0.526735	0.861	0.483	6.72386e-38	EpiSCs_2 (CLDN6Mid EpiSCs)	Cdk6
170	3.45132e-41	1.13922	0.931	0.735	6.90264e-38	EpiSCs_2 (CLDN6Mid EpiSCs)	Npm1
171	1.09245e-39	0.578258	0.757	0.353	2.18491e-36	EpiSCs_2 (CLDN6Mid EpiSCs)	Pitx2
172	5.97467e-39	0.494367	0.792	0.406	1.19493e-35	EpiSCs_2 (CLDN6Mid EpiSCs)	Lss
173	1.96711e-38	0.48268	0.708	0.289	3.93422e-35	EpiSCs_2 (CLDN6Mid EpiSCs)	Trap1a
174	2.93608e-38	0.478511	0.97	0.716	5.87216e-35	EpiSCs_2 (CLDN6Mid EpiSCs)	Epcam
175	4.78403e-38	0.549286	0.98	0.804	9.56806e-35	EpiSCs_2 (CLDN6Mid EpiSCs)	NMPsa2
176	9.92714e-38	0.498445	0.866	0.471	1.98543e-34	EpiSCs_2 (CLDN6Mid EpiSCs)	Cox6b2
177	3.50981e-37	0.474724	0.901	0.631	7.01962e-34	EpiSCs_2 (CLDN6Mid EpiSCs)	Gtpbp4
178	5.94824e-37	0.483879	0.837	0.453	1.18965e-33	EpiSCs_2 (CLDN6Mid EpiSCs)	AA465934
179	8.53514e-36	0.454856	0.837	0.482	1.70703e-32	EpiSCs_2 (CLDN6Mid EpiSCs)	Pmvk
180	8.89274e-36	0.486217	0.876	0.582	1.77855e-32	EpiSCs_2 (CLDN6Mid EpiSCs)	Ubl5
181	1.08337e-35	0.45308	0.772	0.469	2.16675e-32	EpiSCs_2 (CLDN6Mid EpiSCs)	Tpd52
182	5.86199e-35	0.449185	0.98	0.785	1.1724e-31	EpiSCs_2 (CLDN6Mid EpiSCs)	Rbpms2
183	7.40346e-35	0.47374	0.777	0.407	1.48069e-31	EpiSCs_2 (CLDN6Mid EpiSCs)	Msmo1
184	5.30276e-34	0.463374	0.891	0.628	1.06055e-30	EpiSCs_2 (CLDN6Mid EpiSCs)	Cth
185	1.68018e-33	0.791403	0.752	0.497	3.36037e-30	EpiSCs_2 (CLDN6Mid EpiSCs)	Gm14681
186	1.07245e-32	0.514086	0.777	0.441	2.1449e-29	EpiSCs_2 (CLDN6Mid EpiSCs)	Fdps
187	8.27224e-32	0.51208	0.777	0.473	1.65445e-28	EpiSCs_2 (CLDN6Mid EpiSCs)	L1td1
188	7.94105e-31	0.464446	0.936	0.743	1.58821e-27	EpiSCs_2 (CLDN6Mid EpiSCs)	Mthfd2
189	8.14606e-31	0.428475	0.901	0.593	1.62921e-27	EpiSCs_2 (CLDN6Mid EpiSCs)	Psrc1
190	3.53347e-29	0.406654	0.99	0.864	7.06694e-26	EpiSCs_2 (CLDN6Mid EpiSCs)	Tbca
191	1.74899e-27	0.406399	0.762	0.435	3.49798e-24	EpiSCs_2 (CLDN6Mid EpiSCs)	Stard4
192	2.74221e-27	0.424574	0.906	0.732	5.48443e-24	EpiSCs_2 (CLDN6Mid EpiSCs)	Gm2830
193	6.07237e-27	0.406957	0.817	0.577	1.21447e-23	EpiSCs_2 (CLDN6Mid EpiSCs)	Anln
194	1.33352e-26	0.414605	0.634	0.368	2.66703e-23	EpiSCs_2 (CLDN6Mid EpiSCs)	Gm6477
195	1.51261e-23	0.417466	0.822	0.557	3.02522e-20	EpiSCs_2 (CLDN6Mid EpiSCs)	Nanog
196	2.17194e-22	0.398712	0.757	0.496	4.34388e-19	EpiSCs_2 (CLDN6Mid EpiSCs)	Septin11
197	3.51902e-19	0.84408	0.975	0.901	7.03804e-16	EpiSCs_2 (CLDN6Mid EpiSCs)	Tcf7l1
198	4.38648e-17	0.411796	0.975	0.844	8.77296e-14	EpiSCs_2 (CLDN6Mid EpiSCs)	Car2
199	2.80519e-16	0.403105	0.792	0.635	5.61038e-13	EpiSCs_2 (CLDN6Mid EpiSCs)	Soat1
200	1.6085e-12	0.445414	0.832	0.733	3.21701e-09	EpiSCs_2 (CLDN6Mid EpiSCs)	Gm9701
201	7.13407e-45	1.56622	1	0.634	1.42681e-41	EpiSCs_3 (CLDN6Low EpiSCs)	Lgals1
202	3.95775e-42	1.34732	1	0.903	7.9155e-39	EpiSCs_3 (CLDN6Low EpiSCs)	Tpm1
203	5.99567e-42	1.02055	0.932	0.284	1.19913e-38	EpiSCs_3 (CLDN6Low EpiSCs)	Krt19
204	2.0103e-40	1.05141	0.892	0.198	4.0206e-37	EpiSCs_3 (CLDN6Low EpiSCs)	Anxa3
205	2.40851e-39	0.599829	0.892	0.267	4.81702e-36	EpiSCs_3 (CLDN6Low EpiSCs)	Prss23
206	5.38945e-38	0.918993	0.932	0.427	1.07789e-34	EpiSCs_3 (CLDN6Low EpiSCs)	Gadd45b
207	9.77425e-38	0.690011	0.946	0.335	1.95485e-34	EpiSCs_3 (CLDN6Low EpiSCs)	Ahnak
208	4.75927e-35	0.977453	1	0.773	9.51853e-32	EpiSCs_3 (CLDN6Low EpiSCs)	Tagln2
209	1.21158e-34	0.954031	1	0.585	2.42316e-31	EpiSCs_3 (CLDN6Low EpiSCs)	Gm8885
210	8.10284e-34	1.14633	1	0.709	1.62057e-30	EpiSCs_3 (CLDN6Low EpiSCs)	Gm5292
211	1.01805e-33	0.942876	0.986	0.518	2.0361e-30	EpiSCs_3 (CLDN6Low EpiSCs)	Cd9
212	6.63728e-33	0.526395	0.905	0.284	1.32746e-29	EpiSCs_3 (CLDN6Low EpiSCs)	Bhlhe40
213	2.08373e-32	0.872165	0.946	0.377	4.16747e-29	EpiSCs_3 (CLDN6Low EpiSCs)	Csrp1
214	6.40831e-32	1.0873	0.865	0.237	1.28166e-28	EpiSCs_3 (CLDN6Low EpiSCs)	S100a6
215	7.42308e-32	1.13511	1	0.614	1.48462e-28	EpiSCs_3 (CLDN6Low EpiSCs)	Gm14094
216	1.97492e-31	0.399254	0.878	0.249	3.94983e-28	EpiSCs_3 (CLDN6Low EpiSCs)	Rhbdf1
217	2.06309e-31	0.902695	1	0.946	4.12617e-28	EpiSCs_3 (CLDN6Low EpiSCs)	Tuba1a
218	6.67702e-31	0.60636	0.878	0.325	1.3354e-27	EpiSCs_3 (CLDN6Low EpiSCs)	Itga3
219	8.14478e-30	1.12958	1	0.635	1.62896e-26	EpiSCs_3 (CLDN6Low EpiSCs)	Gm8420
220	3.71785e-29	0.814802	0.905	0.344	7.4357e-26	EpiSCs_3 (CLDN6Low EpiSCs)	Perp
221	5.33561e-29	0.785056	0.946	0.403	1.06712e-25	EpiSCs_3 (CLDN6Low EpiSCs)	Anxa2
222	1.07124e-27	0.806118	0.959	0.537	2.14248e-24	EpiSCs_3 (CLDN6Low EpiSCs)	Pdlim1
223	1.41445e-27	0.869539	1	0.773	2.82891e-24	EpiSCs_3 (CLDN6Low EpiSCs)	Asns
224	2.02486e-27	0.816174	1	0.876	4.04972e-24	EpiSCs_3 (CLDN6Low EpiSCs)	S100a10
225	5.09457e-27	0.832082	1	0.639	1.01891e-23	EpiSCs_3 (CLDN6Low EpiSCs)	Pdlim7
226	6.05867e-27	0.443291	0.73	0.162	1.21173e-23	EpiSCs_3 (CLDN6Low EpiSCs)	Spp1
227	9.65537e-27	0.860846	1	0.988	1.93107e-23	EpiSCs_3 (CLDN6Low EpiSCs)	Rps3a3
228	1.29477e-26	0.725087	0.973	0.499	2.58953e-23	EpiSCs_3 (CLDN6Low EpiSCs)	Rras
229	3.49536e-26	1.20958	0.973	0.76	6.99073e-23	EpiSCs_3 (CLDN6Low EpiSCs)	Vim
230	2.65402e-25	0.755496	1	0.831	5.30804e-22	EpiSCs_3 (CLDN6Low EpiSCs)	Ly6e
231	2.94486e-25	0.754542	0.946	0.484	5.88972e-22	EpiSCs_3 (CLDN6Low EpiSCs)	Cox6b2
232	3.90348e-25	0.949947	0.865	0.319	7.80696e-22	EpiSCs_3 (CLDN6Low EpiSCs)	Hspb1
233	5.45189e-25	0.830754	0.878	0.326	1.09038e-21	EpiSCs_3 (CLDN6Low EpiSCs)	Cdkn1a
234	5.82895e-25	0.719982	1	1	1.16579e-21	EpiSCs_3 (CLDN6Low EpiSCs)	Gm11942
235	1.33583e-24	0.964508	0.905	0.461	2.67165e-21	EpiSCs_3 (CLDN6Low EpiSCs)	Ccn1
236	1.33745e-24	0.760202	1	0.988	2.67491e-21	EpiSCs_3 (CLDN6Low EpiSCs)	Gm10036
237	1.85004e-24	0.73079	1	0.775	3.70008e-21	EpiSCs_3 (CLDN6Low EpiSCs)	Pycr2
238	6.12312e-24	0.654398	1	0.883	1.22462e-20	EpiSCs_3 (CLDN6Low EpiSCs)	Glo1
239	7.29766e-24	0.629379	0.932	0.435	1.45953e-20	EpiSCs_3 (CLDN6Low EpiSCs)	Map1b
240	9.02645e-24	0.496716	0.919	0.379	1.80529e-20	EpiSCs_3 (CLDN6Low EpiSCs)	Plec
241	2.26066e-23	0.643725	0.959	0.48	4.52133e-20	EpiSCs_3 (CLDN6Low EpiSCs)	Akap12
242	2.31038e-23	0.889744	0.919	0.558	4.62076e-20	EpiSCs_3 (CLDN6Low EpiSCs)	Stmn2
243	2.75626e-23	0.769406	0.932	0.444	5.51251e-20	EpiSCs_3 (CLDN6Low EpiSCs)	Txnip
244	4.40976e-23	0.561274	0.824	0.254	8.81951e-20	EpiSCs_3 (CLDN6Low EpiSCs)	Clu
245	2.78593e-22	0.721846	0.973	0.685	5.57186e-19	EpiSCs_3 (CLDN6Low EpiSCs)	Flnb
246	2.80423e-22	0.600545	0.865	0.399	5.60846e-19	EpiSCs_3 (CLDN6Low EpiSCs)	Phlda1
247	6.01902e-22	0.753297	0.986	0.635	1.2038e-18	EpiSCs_3 (CLDN6Low EpiSCs)	Cth
248	1.59622e-21	0.610244	1	0.987	3.19244e-18	EpiSCs_3 (CLDN6Low EpiSCs)	Rps13-ps1
249	3.25187e-21	0.737783	0.973	0.673	6.50373e-18	EpiSCs_3 (CLDN6Low EpiSCs)	Ftl1
250	3.7433e-21	0.741134	0.973	0.74	7.48661e-18	EpiSCs_3 (CLDN6Low EpiSCs)	Sparc
251	2.23945e-20	0.727735	0.973	0.763	4.4789e-17	EpiSCs_3 (CLDN6Low EpiSCs)	Hmgcs1
252	1.27338e-19	0.697419	1	0.67	2.54675e-16	EpiSCs_3 (CLDN6Low EpiSCs)	Chchd10
253	1.36314e-18	0.600355	0.676	0.077	2.72629e-15	EpiSCs_3 (CLDN6Low EpiSCs)	Gbp2b
254	3.01765e-18	0.603233	0.959	0.694	6.03531e-15	EpiSCs_3 (CLDN6Low EpiSCs)	NMPse2b
255	3.72769e-18	0.51121	0.905	0.51	7.45537e-15	EpiSCs_3 (CLDN6Low EpiSCs)	Cald1
256	6.40891e-18	0.575495	0.946	0.661	1.28178e-14	EpiSCs_3 (CLDN6Low EpiSCs)	Krt8
257	1.08227e-17	0.616497	0.973	0.722	2.16455e-14	EpiSCs_3 (CLDN6Low EpiSCs)	NMPse2
258	1.20987e-17	0.462211	0.905	0.426	2.41975e-14	EpiSCs_3 (CLDN6Low EpiSCs)	Dhcr7
259	1.69311e-17	0.41152	0.932	0.477	3.38623e-14	EpiSCs_3 (CLDN6Low EpiSCs)	Tpd52
260	1.97992e-17	0.550062	0.946	0.665	3.95985e-14	EpiSCs_3 (CLDN6Low EpiSCs)	Tubb6
261	2.07803e-17	0.688926	0.878	0.525	4.15605e-14	EpiSCs_3 (CLDN6Low EpiSCs)	Anxa5
262	2.6168e-17	0.475086	0.797	0.279	5.2336e-14	EpiSCs_3 (CLDN6Low EpiSCs)	Gadd45a
263	4.87461e-17	0.8432	0.797	0.328	9.74922e-14	EpiSCs_3 (CLDN6Low EpiSCs)	Igfbp3
264	7.40048e-17	0.447077	0.932	0.444	1.4801e-13	EpiSCs_3 (CLDN6Low EpiSCs)	Stard4
265	7.88603e-17	0.678297	0.932	0.397	1.57721e-13	EpiSCs_3 (CLDN6Low EpiSCs)	Lefty1
266	1.40701e-16	0.554933	0.838	0.347	2.81401e-13	EpiSCs_3 (CLDN6Low EpiSCs)	Enpp3
267	2.14593e-16	0.516765	0.811	0.303	4.29187e-13	EpiSCs_3 (CLDN6Low EpiSCs)	Trap1a
268	2.40528e-16	0.539043	1	0.915	4.81055e-13	EpiSCs_3 (CLDN6Low EpiSCs)	Bex1
269	8.94201e-16	0.473312	0.689	0.159	1.7884e-12	EpiSCs_3 (CLDN6Low EpiSCs)	BC064078
270	1.03443e-15	0.414272	0.919	0.454	2.06886e-12	EpiSCs_3 (CLDN6Low EpiSCs)	Cotl1
271	4.17546e-15	0.541956	0.649	0.106	8.35092e-12	EpiSCs_3 (CLDN6Low EpiSCs)	Gbp2
272	7.31712e-15	0.562298	0.838	0.425	1.46342e-11	EpiSCs_3 (CLDN6Low EpiSCs)	Nes
273	1.08512e-14	0.746094	0.973	0.708	2.17025e-11	EpiSCs_3 (CLDN6Low EpiSCs)	Krt18
274	1.33278e-14	0.470951	0.986	0.782	2.66555e-11	EpiSCs_3 (CLDN6Low EpiSCs)	Slc2a3
275	1.93244e-14	0.493888	0.986	0.814	3.86489e-11	EpiSCs_3 (CLDN6Low EpiSCs)	Adk
276	2.47809e-14	0.427911	0.784	0.377	4.95617e-11	EpiSCs_3 (CLDN6Low EpiSCs)	Palld
277	3.86225e-14	0.719463	0.892	0.6	7.72449e-11	EpiSCs_3 (CLDN6Low EpiSCs)	Tmsb4x
278	6.37483e-14	0.456923	0.986	0.844	1.27497e-10	EpiSCs_3 (CLDN6Low EpiSCs)	Slc3a2
279	1.50267e-13	0.411442	0.865	0.55	3.00535e-10	EpiSCs_3 (CLDN6Low EpiSCs)	Klf6
280	1.64343e-13	0.465282	1	0.942	3.28686e-10	EpiSCs_3 (CLDN6Low EpiSCs)	Cdc42
281	3.67178e-13	0.57942	0.946	0.71	7.34355e-10	EpiSCs_3 (CLDN6Low EpiSCs)	Cnn2
282	4.61121e-13	0.402996	0.919	0.495	9.22243e-10	EpiSCs_3 (CLDN6Low EpiSCs)	Cdk6
283	5.52187e-13	0.450214	0.797	0.329	1.10437e-09	EpiSCs_3 (CLDN6Low EpiSCs)	Sat1
284	1.48016e-12	0.542458	0.905	0.594	2.96031e-09	EpiSCs_3 (CLDN6Low EpiSCs)	Fdft1
285	2.73523e-12	0.496275	0.743	0.276	5.47047e-09	EpiSCs_3 (CLDN6Low EpiSCs)	Klf5
286	4.19497e-12	0.402556	0.797	0.398	8.38994e-09	EpiSCs_3 (CLDN6Low EpiSCs)	1500009L16Rik
287	4.86592e-12	0.4928	1	0.973	9.73185e-09	EpiSCs_3 (CLDN6Low EpiSCs)	Malat1
288	5.18699e-12	0.864456	0.703	0.255	1.0374e-08	EpiSCs_3 (CLDN6Low EpiSCs)	Tagln
289	6.92532e-12	0.399288	0.986	0.889	1.38506e-08	EpiSCs_3 (CLDN6Low EpiSCs)	Scd2
290	1.48317e-11	0.444492	0.946	0.821	2.96634e-08	EpiSCs_3 (CLDN6Low EpiSCs)	Psat1
291	1.79863e-10	0.476517	0.649	0.182	3.59725e-07	EpiSCs_3 (CLDN6Low EpiSCs)	Fgfbp1
292	3.97217e-10	0.49077	0.878	0.516	7.94434e-07	EpiSCs_3 (CLDN6Low EpiSCs)	Utf1
293	4.43567e-10	0.507064	0.838	0.529	8.87134e-07	EpiSCs_3 (CLDN6Low EpiSCs)	Mdm2
294	1.04622e-09	0.536016	0.973	0.866	2.09243e-06	EpiSCs_3 (CLDN6Low EpiSCs)	Apoe
295	1.58737e-09	0.41594	0.743	0.317	3.17473e-06	EpiSCs_3 (CLDN6Low EpiSCs)	Nefl
296	2.65497e-09	0.414676	0.824	0.519	5.30994e-06	EpiSCs_3 (CLDN6Low EpiSCs)	Col18a1
297	3.21773e-09	0.442031	0.959	0.803	6.43545e-06	EpiSCs_3 (CLDN6Low EpiSCs)	Igfbp2
298	8.57935e-09	0.393116	0.892	0.623	1.71587e-05	EpiSCs_3 (CLDN6Low EpiSCs)	Pmm1
299	1.4405e-07	0.417068	0.905	0.68	0.000288101	EpiSCs_3 (CLDN6Low EpiSCs)	Tsc22d1
300	1.12341e-06	0.395426	0.824	0.583	0.00224682	EpiSCs_3 (CLDN6Low EpiSCs)	NMPsb10
301	2.02983e-53	0.673525	0.955	0.45	4.05966e-50	6hAPS	AA465934
302	9.81532e-50	0.565041	0.983	0.561	1.96306e-46	6hAPS	Pim2
303	2.70296e-45	0.286083	0.892	0.253	5.40591e-42	6hAPS	Kcnj3
304	1.64664e-44	0.250348	0.994	0.455	3.29327e-41	6hAPS	Slc39a8
305	4.35322e-44	0.601268	1	0.498	8.70644e-41	6hAPS	Utf1
306	1.01476e-42	0.537488	1	0.786	2.02951e-39	6hAPS	Rbpms2
307	2.16954e-41	0.439137	0.926	0.371	4.33907e-38	6hAPS	Slc7a3
308	2.91211e-38	0.501958	0.994	0.66	5.82422e-35	6hAPS	Chchd10
309	3.90168e-38	0.286002	0.875	0.342	7.80336e-35	6hAPS	Cbx7
310	2.09068e-37	0.439283	0.972	0.551	4.18136e-34	6hAPS	Nanog
311	3.43382e-36	0.38325	1	1	6.86765e-33	6hAPS	Gm11942
312	1.01637e-35	0.446925	0.886	0.329	2.03274e-32	6hAPS	Enpp3
313	1.89727e-35	0.350863	1	0.986	3.79454e-32	6hAPS	Rps13-ps1
314	2.44762e-31	0.420338	0.983	0.712	4.89524e-28	6hAPS	Mkrn1
315	2.75579e-31	0.431879	0.841	0.299	5.51158e-28	6hAPS	Nefl
316	3.60761e-31	0.453265	1	0.716	7.21522e-28	6hAPS	Epcam
317	1.40511e-30	0.289028	1	0.988	2.81022e-27	6hAPS	Gm10036
318	2.86125e-30	0.452814	0.915	0.468	5.72251e-27	6hAPS	L1td1
319	2.67755e-28	0.402837	0.881	0.405	5.3551e-25	6hAPS	Msmo1
320	1.11317e-27	0.399101	1	0.911	2.22635e-24	6hAPS	Dnmt3b
321	2.76103e-27	0.428025	0.994	0.767	5.52206e-24	6hAPS	Asns
322	7.90634e-27	0.453961	0.983	0.756	1.58127e-23	6hAPS	Hmgcs1
323	1.03135e-24	0.405556	0.92	0.584	2.0627e-21	6hAPS	Fdft1
324	1.13133e-24	0.251072	0.994	0.559	2.26266e-21	6hAPS	Gm47230
325	1.32693e-24	0.368014	0.966	0.592	2.65386e-21	6hAPS	Psrc1
326	2.71189e-24	0.322251	1	0.998	5.42378e-21	6hAPS	Rps27a
327	3.0037e-24	0.258681	0.869	0.414	6.0074e-21	6hAPS	Glrx
328	9.71079e-24	0.275595	0.994	0.609	1.94216e-20	6hAPS	Nusap1
329	1.49218e-22	0.296253	1	0.663	2.98435e-19	6hAPS	Cdh1
330	1.59239e-22	0.362896	0.994	0.797	3.18479e-19	6hAPS	Igfbp2
331	3.22993e-22	0.357558	0.966	0.688	6.45986e-19	6hAPS	Zmynd8
332	1.57996e-21	0.318757	1	0.776	3.15993e-18	6hAPS	Ppia
333	6.01987e-21	0.337994	1	0.804	1.20397e-17	6hAPS	Cox7c-ps1
334	1.81271e-20	0.258615	0.881	0.532	3.62542e-17	6hAPS	Mt1
335	9.30084e-20	0.333498	1	0.974	1.86017e-16	6hAPS	Rps27a-ps3
336	1.60699e-19	0.255823	0.966	0.603	3.21399e-16	6hAPS	Psph
337	1.75092e-18	0.259856	1	0.766	3.50184e-15	6hAPS	Gm9320
338	6.45172e-18	0.349599	1	0.853	1.29034e-14	6hAPS	Rps27rt
339	8.8753e-17	0.26917	0.994	0.92	1.77506e-13	6hAPS	Snrpn
340	1.50991e-15	0.286877	0.983	0.742	3.01982e-12	6hAPS	Mthfd2
341	2.48819e-15	0.264296	0.989	0.766	4.97638e-12	6hAPS	Tagln2
342	1.00696e-14	0.260241	0.83	0.386	2.01393e-11	6hAPS	Lefty1
343	3.80761e-14	0.348599	1	0.941	7.61521e-11	6hAPS	Rps27
344	6.36344e-13	0.255396	0.767	0.37	1.27269e-09	6hAPS	Sema6a
345	1.3916e-12	0.260274	0.977	0.805	2.78319e-09	6hAPS	NMPsa2
346	3.00362e-12	0.254166	1	0.972	6.00724e-09	6hAPS	Malat1
347	6.95342e-12	0.27053	0.778	0.41	1.39068e-08	6hAPS	Lss
348	1.89406e-08	0.254223	1	0.987	3.78811e-05	6hAPS	Rpl17
349	8.69039e-102	0.780221	1	0.905	1.73808e-98	Anterior PS	Dnmt3b
350	2.44842e-94	0.648651	0.946	0.522	4.89684e-91	Anterior PS	Fst
351	2.69341e-86	0.283954	0.853	0.384	5.38682e-83	Anterior PS	Psors1c2
352	5.02512e-85	0.784469	0.962	0.583	1.00502e-81	Anterior PS	Mixl1
353	5.21698e-83	0.258717	0.877	0.423	1.0434e-79	Anterior PS	Rbm47
354	2.96427e-73	0.261104	0.91	0.513	5.92855e-70	Anterior PS	Ap1m2
355	1.30853e-72	0.343483	0.894	0.442	2.61706e-69	Anterior PS	Foxa2
356	1.8704e-71	0.635245	0.975	0.641	3.74081e-68	Anterior PS	Eomes
357	1.12427e-70	0.521829	0.932	0.476	2.24855e-67	Anterior PS	Fgf8
358	1.44241e-69	0.471002	0.768	0.295	2.88483e-66	Anterior PS	Apln
359	1.99637e-66	0.56336	0.997	0.889	3.99273e-63	Anterior PS	Larp7
360	2.6477e-64	0.557439	0.951	0.585	5.2954e-61	Anterior PS	Sp5
361	1.08148e-58	0.262085	0.929	0.482	2.16296e-55	Anterior PS	Gng3
362	1.27658e-58	0.405645	0.997	0.915	2.55316e-55	Anterior PS	Snrpn
363	6.55938e-58	0.567644	0.858	0.372	1.31188e-54	Anterior PS	Gsc
364	2.89387e-57	0.296968	0.749	0.242	5.78773e-54	Anterior PS	Lzts1
365	5.94207e-52	0.531324	0.891	0.482	1.18841e-48	Anterior PS	Rtl8b
366	3.0205e-50	0.314733	1	0.994	6.04099e-47	Anterior PS	Rpl7a-ps7
367	2.93284e-49	0.362803	0.965	0.604	5.86568e-46	Anterior PS	Otx2
368	6.61043e-49	0.466778	0.997	0.803	1.32209e-45	Anterior PS	Tdgf1
369	1.05076e-47	0.400509	0.995	0.864	2.10152e-44	Anterior PS	Bex4
370	1.93563e-42	0.256573	0.921	0.594	3.87126e-39	Anterior PS	T-Bra
371	2.7695e-42	0.313421	0.817	0.386	5.539e-39	Anterior PS	Fgf5
372	3.73446e-40	0.363124	0.801	0.369	7.46892e-37	Anterior PS	Epha2
373	1.87644e-35	0.330151	0.986	0.786	3.75289e-32	Anterior PS	Igfbp2
374	1.646e-34	0.318941	0.951	0.723	3.292e-31	Anterior PS	Arid3b
375	9.8179e-32	0.33504	0.888	0.598	1.96358e-28	Anterior PS	Nxn
376	2.64733e-28	0.336627	0.856	0.531	5.29467e-25	Anterior PS	Sumo2
377	1.48255e-26	0.343932	0.995	0.967	2.9651e-23	Anterior PS	Ubb
378	1.91463e-24	0.330814	1	0.967	3.82926e-21	Anterior PS	Gm10263
379	1.77146e-22	0.256068	0.847	0.595	3.54292e-19	Anterior PS	Oaz2
380	9.30692e-20	0.275485	0.796	0.518	1.86138e-16	Anterior PS	Stk24
381	2.1194e-19	0.275053	0.995	0.973	4.2388e-16	Anterior PS	H2az2
382	3.25997e-80	0.731849	0.988	0.621	6.51993e-77	Nascent mesoderm E6,5	Mesp1
383	1.28896e-75	0.439524	0.922	0.523	2.57792e-72	Nascent mesoderm E6,5	Stmn1
384	1.5869e-67	0.28724	0.757	0.273	3.1738e-64	Nascent mesoderm E6,5	Arl4d
385	1.06094e-62	0.593767	0.997	0.973	2.12188e-59	Nascent mesoderm E6,5	Rps2
386	1.30422e-62	0.293284	0.922	0.462	2.60845e-59	Nascent mesoderm E6,5	Gata4
387	2.1538e-59	0.575202	0.916	0.526	4.30759e-56	Nascent mesoderm E6,5	Lefty2
388	7.14151e-53	0.518629	0.955	0.588	1.4283e-49	Nascent mesoderm E6,5	Mixl1
389	2.08516e-51	0.535243	1	0.805	4.17031e-48	Nascent mesoderm E6,5	Tdgf1
390	6.66842e-47	0.469455	0.994	0.867	1.33368e-43	Nascent mesoderm E6,5	S100a10
391	1.15586e-46	0.328598	0.934	0.564	2.31171e-43	Nascent mesoderm E6,5	Dlc1
392	2.23207e-44	0.476806	0.925	0.596	4.46415e-41	Nascent mesoderm E6,5	Lhx1
393	9.24092e-44	0.518078	0.943	0.658	1.84818e-40	Nascent mesoderm E6,5	Snai1
394	7.37436e-41	0.36945	0.862	0.494	1.47487e-37	Nascent mesoderm E6,5	Dll3
395	8.54309e-38	0.398604	1	0.967	1.70862e-34	Nascent mesoderm E6,5	Rps13-ps2
396	3.93699e-37	0.423347	0.922	0.616	7.87398e-34	Nascent mesoderm E6,5	Cyp26a1
397	3.45144e-36	0.319913	0.925	0.568	6.90289e-33	Nascent mesoderm E6,5	Grrp1
398	1.86494e-35	0.328495	1	0.997	3.72988e-32	Nascent mesoderm E6,5	Gm10288
399	2.18734e-34	0.262107	0.901	0.589	4.37469e-31	Nascent mesoderm E6,5	Gata6
400	1.26926e-32	0.406143	0.868	0.603	2.53851e-29	Nascent mesoderm E6,5	T-Bra
401	1.38245e-30	0.321943	0.874	0.564	2.7649e-27	Nascent mesoderm E6,5	Smad1
402	4.55005e-30	0.280398	1	0.978	9.1001e-27	Nascent mesoderm E6,5	Gm6023
403	5.50393e-28	0.340654	0.817	0.493	1.10079e-24	Nascent mesoderm E6,5	Fgf8
404	5.37772e-27	0.272279	0.877	0.599	1.07554e-23	Nascent mesoderm E6,5	Id1
405	2.97813e-26	0.312082	0.91	0.593	5.95626e-23	Nascent mesoderm E6,5	Sp5
406	2.0341e-25	0.265021	1	0.981	4.06819e-22	Nascent mesoderm E6,5	Gm8960
407	6.10129e-23	0.310914	0.973	0.837	1.22026e-19	Nascent mesoderm E6,5	Fn1
408	1.25835e-22	0.290527	0.997	0.864	2.5167e-19	Nascent mesoderm E6,5	Sall4
409	3.03138e-22	0.255088	0.736	0.39	6.06276e-19	Nascent mesoderm E6,5	Gsc
410	2.27204e-21	0.29028	0.931	0.619	4.54409e-18	Nascent mesoderm E6,5	Socs2
411	9.88705e-21	0.254919	0.967	0.824	1.97741e-17	Nascent mesoderm E6,5	Rpl34-ps2
412	1.22879e-19	0.263745	0.709	0.384	2.45757e-16	Nascent mesoderm E6,5	Efna3
413	1.35121e-19	0.354607	0.886	0.711	2.70243e-16	Nascent mesoderm E6,5	NMPse2
414	2.4401e-19	0.255623	0.763	0.489	4.88019e-16	Nascent mesoderm E6,5	Nin
415	3.86134e-18	0.271216	0.922	0.75	7.72268e-15	Nascent mesoderm E6,5	Gm4987
416	9.15931e-18	0.266778	0.91	0.69	1.83186e-14	Nascent mesoderm E6,5	Gpc3
417	2.46505e-16	0.25245	0.76	0.502	4.9301e-13	Nascent mesoderm E6,5	Cdh11
418	5.36508e-16	0.324403	0.853	0.684	1.07302e-12	Nascent mesoderm E6,5	NMPse2b
419	5.83066e-14	0.276543	1	0.994	1.16613e-10	Nascent mesoderm E6,5	Rps3a1
420	4.92404e-07	0.260574	0.694	0.5	0.000984808	Nascent mesoderm E6,5	Frzb
421	1.52678e-138	1.04582	0.998	0.912	3.05356e-135	Nascent mesoderm E7,0	Rps24-ps3
422	3.18517e-108	0.710072	1	0.84	6.37034e-105	Nascent mesoderm E7,0	Rps27rt
423	9.15075e-106	0.641472	0.998	0.9	1.83015e-102	Nascent mesoderm E7,0	Cox7a2
424	1.62401e-99	0.680075	1	0.936	3.24803e-96	Nascent mesoderm E7,0	Rps27
425	1.36776e-97	1.14456	0.933	0.655	2.73553e-94	Nascent mesoderm E7,0	Rps25
426	7.23225e-97	0.609186	1	0.992	1.44645e-93	Nascent mesoderm E7,0	Rps24
427	8.70249e-96	1.05895	0.877	0.567	1.7405e-92	Nascent mesoderm E7,0	Gm6988
428	7.41472e-89	0.905056	0.856	0.556	1.48294e-85	Nascent mesoderm E7,0	Rps25-ps1
429	1.47291e-87	0.621281	0.998	0.913	2.94582e-84	Nascent mesoderm E7,0	Gm8292
430	8.74622e-85	0.579049	1	0.966	1.74924e-81	Nascent mesoderm E7,0	Gm10263
431	1.36775e-83	0.572662	0.951	0.754	2.73549e-80	Nascent mesoderm E7,0	Gm9320
432	7.72621e-83	0.890168	0.84	0.559	1.54524e-79	Nascent mesoderm E7,0	Gm2225
433	2.57724e-82	0.572222	0.981	0.79	5.15448e-79	Nascent mesoderm E7,0	NMPsa2
434	2.5222e-80	0.456545	1	0.972	5.0444e-77	Nascent mesoderm E7,0	Rps27a-ps3
435	1.18093e-75	0.606797	0.944	0.638	2.36186e-72	Nascent mesoderm E7,0	Eomes
436	1.51569e-74	0.455987	0.998	0.967	3.03138e-71	Nascent mesoderm E7,0	Rps13-ps2
437	9.59693e-71	0.977105	0.833	0.631	1.91939e-67	Nascent mesoderm E7,0	Mesp1
438	1.46914e-68	0.534656	0.845	0.623	2.93828e-65	Nascent mesoderm E7,0	Sf3b6
439	3.76573e-68	0.874494	0.78	0.585	7.53146e-65	Nascent mesoderm E7,0	Rps15a
440	1.46035e-67	0.355385	1	0.998	2.92069e-64	Nascent mesoderm E7,0	Rps27a
441	3.51261e-67	0.7986	0.981	0.895	7.02521e-64	Nascent mesoderm E7,0	Tcf7l1
442	3.63058e-67	0.365772	1	0.996	7.26115e-64	Nascent mesoderm E7,0	Gm10288
443	4.30827e-66	0.598339	0.847	0.642	8.61653e-63	Nascent mesoderm E7,0	Sec61g
444	3.69766e-63	0.295113	1	0.996	7.39533e-60	Nascent mesoderm E7,0	Gm15536
445	3.77144e-59	0.434092	0.972	0.876	7.54289e-56	Nascent mesoderm E7,0	Pclaf
446	2.93459e-58	0.49699	0.787	0.573	5.86919e-55	Nascent mesoderm E7,0	Ubl5
447	3.55763e-57	0.552452	0.875	0.658	7.11525e-54	Nascent mesoderm E7,0	Snai1
448	8.85145e-57	0.475765	0.84	0.635	1.77029e-53	Nascent mesoderm E7,0	Snrpb2
449	1.52897e-54	1.17592	0.882	0.727	3.05793e-51	Nascent mesoderm E7,0	Npm1
450	6.07968e-54	0.425685	0.882	0.722	1.21594e-50	Nascent mesoderm E7,0	Gm2830
451	1.06096e-53	1.04208	0.791	0.641	2.12193e-50	Nascent mesoderm E7,0	Rps4x
452	9.51299e-52	0.322252	1	0.969	1.9026e-48	Nascent mesoderm E7,0	C230062I16Rik
453	2.25e-48	0.417448	0.812	0.623	4.5e-45	Nascent mesoderm E7,0	Gtpbp4
454	1.68043e-47	0.385172	0.972	0.857	3.36086e-44	Nascent mesoderm E7,0	Tbca
455	9.05004e-42	0.493	0.854	0.59	1.81001e-38	Nascent mesoderm E7,0	Mixl1
456	2.89165e-41	0.274426	1	0.98	5.7833e-38	Nascent mesoderm E7,0	Gm8960
457	5.09592e-41	0.352854	0.872	0.748	1.01918e-37	Nascent mesoderm E7,0	Eif4e
458	1.0608e-38	0.265385	1	0.989	2.1216e-35	Nascent mesoderm E7,0	Ubb-ps
459	3.89055e-37	0.349286	0.882	0.774	7.78111e-34	Nascent mesoderm E7,0	Ppia
460	5.42901e-37	0.719716	0.65	0.518	1.0858e-33	Nascent mesoderm E7,0	Cecr2
461	1.06213e-35	0.782269	0.668	0.555	2.12426e-32	Nascent mesoderm E7,0	Gm9616
462	1.82956e-35	0.348049	0.798	0.627	3.65912e-32	Nascent mesoderm E7,0	Socs2
463	2.05389e-35	0.342432	0.78	0.646	4.10779e-32	Nascent mesoderm E7,0	Cops2
464	1.19709e-34	0.445606	0.798	0.603	2.39418e-31	Nascent mesoderm E7,0	Lhx1
465	3.96565e-34	0.556773	0.821	0.683	7.9313e-31	Nascent mesoderm E7,0	H1f4
466	1.58659e-33	0.377034	0.824	0.595	3.17318e-30	Nascent mesoderm E7,0	Sp5
467	2.56935e-33	0.977759	0.619	0.496	5.1387e-30	Nascent mesoderm E7,0	Gm14681
468	3.36359e-32	0.669564	0.675	0.547	6.72718e-29	Nascent mesoderm E7,0	Lefty2
469	5.75288e-32	0.406573	0.735	0.543	1.15058e-28	Nascent mesoderm E7,0	Fst
470	5.8305e-32	0.528808	0.944	0.911	1.1661e-28	Nascent mesoderm E7,0	Dnmt3b
471	1.54232e-30	0.401554	0.794	0.624	3.08464e-27	Nascent mesoderm E7,0	Cyp26a1
472	1.84122e-30	0.25957	0.981	0.888	3.68244e-27	Nascent mesoderm E7,0	Larp7
473	1.32081e-27	0.43543	0.661	0.515	2.64162e-24	Nascent mesoderm E7,0	H1f5
474	5.10445e-27	0.341098	0.65	0.541	1.02089e-23	Nascent mesoderm E7,0	Rpf2
475	1.50553e-26	0.253618	0.501	0.356	3.01105e-23	Nascent mesoderm E7,0	Wnt3
476	3.86483e-26	0.290432	0.886	0.79	7.72965e-23	Nascent mesoderm E7,0	Ptges3
477	2.07107e-25	0.296892	0.643	0.501	4.14214e-22	Nascent mesoderm E7,0	Frzb
478	5.67431e-25	0.269939	0.988	0.8	1.13486e-21	Nascent mesoderm E7,0	Tdgf1
479	5.96506e-25	0.257956	0.914	0.824	1.19301e-21	Nascent mesoderm E7,0	Gm8624
480	1.23089e-24	0.253326	0.782	0.651	2.46179e-21	Nascent mesoderm E7,0	Mycn
481	6.08628e-22	0.250037	0.747	0.636	1.21726e-18	Nascent mesoderm E7,0	Gm12020
482	6.96214e-22	0.259394	0.949	0.866	1.39243e-18	Nascent mesoderm E7,0	Sall4
483	1.04065e-20	0.401039	0.833	0.817	2.0813e-17	Nascent mesoderm E7,0	Gm8797
484	1.32845e-20	0.302314	0.666	0.544	2.65691e-17	Nascent mesoderm E7,0	Mir6236
485	4.9671e-20	0.287165	0.464	0.374	9.9342e-17	Nascent mesoderm E7,0	H1f1
486	6.73549e-20	0.324342	0.654	0.592	1.3471e-16	Nascent mesoderm E7,0	Dlc1
487	7.24979e-20	0.260254	0.501	0.394	1.44996e-16	Nascent mesoderm E7,0	NMPsc6
488	1.70794e-18	0.299912	0.432	0.355	3.41589e-15	Nascent mesoderm E7,0	Pcdh8
489	2.8312e-18	0.412673	0.497	0.446	5.6624e-15	Nascent mesoderm E7,0	Gm37760
490	2.29129e-16	0.281178	0.933	0.839	4.58258e-13	Nascent mesoderm E7,0	Fn1
491	3.033e-16	0.269868	0.647	0.6	6.066e-13	Nascent mesoderm E7,0	Tmsb4x
492	4.04257e-15	0.416961	0.459	0.396	8.08515e-12	Nascent mesoderm E7,0	Mesp2
493	8.03761e-14	0.503981	0.436	0.375	1.60752e-10	Nascent mesoderm E7,0	Gm6477
494	1.19055e-13	0.265695	0.657	0.635	2.38109e-10	Nascent mesoderm E7,0	Gm10184
495	4.06799e-13	0.442008	0.951	0.944	8.13598e-10	Nascent mesoderm E7,0	Rpl32l
496	4.09118e-13	0.748168	0.571	0.555	8.18236e-10	Nascent mesoderm E7,0	Med16
497	2.16921e-12	0.258984	0.445	0.413	4.33842e-09	Nascent mesoderm E7,0	H1f3
498	3.1303e-10	0.564279	0.448	0.419	6.2606e-07	Nascent mesoderm E7,0	Gm9118
499	1.71727e-09	0.373158	0.745	0.769	3.43454e-06	Nascent mesoderm E7,0	Gm4987
500	8.57902e-08	0.254436	0.555	0.561	0.00017158	Nascent mesoderm E7,0	Stmn1
501	1.37504e-07	0.256955	0.561	0.584	0.000275008	Nascent mesoderm E7,0	Fgf3
502	8.37697e-07	0.330009	0.52	0.515	0.00167539	Nascent mesoderm E7,0	Nlrc3
503	2.30345e-06	0.321051	0.91	0.901	0.0046069	Nascent mesoderm E7,0	Hprt
504	1.39092e-05	0.349931	0.313	0.31	0.0278184	Nascent mesoderm E7,0	Gm5611
505	2.76806e-05	0.334828	0.733	0.739	0.0553612	Nascent mesoderm E7,0	Gm9701
506	4.44992e-102	0.601077	0.924	0.468	8.89984e-99	Cardiac mesoderm progenitors	Gata4
507	2.81494e-96	1.0728	0.99	0.626	5.62988e-93	Cardiac mesoderm progenitors	Mesp1
508	1.41422e-87	0.832142	0.997	0.837	2.82845e-84	Cardiac mesoderm progenitors	Fn1
509	7.69449e-83	0.934209	0.91	0.532	1.5389e-79	Cardiac mesoderm progenitors	Lefty2
510	1.87833e-81	0.790416	0.986	0.658	3.75666e-78	Cardiac mesoderm progenitors	Snai1
511	4.83728e-79	0.701007	0.91	0.495	9.67457e-76	Cardiac mesoderm progenitors	Dll3
512	2.58777e-61	0.433869	0.868	0.556	5.17554e-58	Cardiac mesoderm progenitors	Kdr
513	3.29675e-60	0.423495	0.889	0.553	6.5935e-57	Cardiac mesoderm progenitors	Fgf3
514	4.24821e-58	0.600648	1	0.808	8.49642e-55	Cardiac mesoderm progenitors	Tdgf1
515	7.29979e-56	0.29648	0.764	0.434	1.45996e-52	Cardiac mesoderm progenitors	Tbx3
516	3.50565e-50	0.374716	0.781	0.48	7.01129e-47	Cardiac mesoderm progenitors	Etv2
517	1.86667e-49	0.449183	0.875	0.575	3.73335e-46	Cardiac mesoderm progenitors	Dlc1
518	4.80923e-48	0.281983	0.767	0.459	9.61846e-45	Cardiac mesoderm progenitors	Pth1r
519	8.08477e-48	0.474459	0.799	0.381	1.61695e-44	Cardiac mesoderm progenitors	Efna3
520	1.96133e-47	0.463142	0.896	0.632	3.92266e-44	Cardiac mesoderm progenitors	Igfbp4
521	2.09437e-47	0.533275	0.712	0.333	4.18874e-44	Cardiac mesoderm progenitors	Lmo1
522	2.30423e-47	0.451041	0.802	0.567	4.60847e-44	Cardiac mesoderm progenitors	Myl7
523	3.5167e-45	0.310739	0.774	0.438	7.03341e-42	Cardiac mesoderm progenitors	Msx2
524	4.13917e-45	0.380217	0.833	0.526	8.27833e-42	Cardiac mesoderm progenitors	Cxcr4
525	1.03034e-41	0.415516	0.899	0.576	2.06068e-38	Cardiac mesoderm progenitors	Grrp1
526	1.29406e-41	0.284805	0.806	0.505	2.58813e-38	Cardiac mesoderm progenitors	Pdgfra
527	1.42509e-41	0.490939	0.903	0.603	2.85019e-38	Cardiac mesoderm progenitors	Lhx1
528	5.91821e-41	0.535065	0.896	0.622	1.18364e-37	Cardiac mesoderm progenitors	Cyp26a1
529	3.14334e-40	0.353369	0.972	0.705	6.28668e-37	Cardiac mesoderm progenitors	Ifitm1
530	7.94851e-40	0.28119	0.653	0.264	1.5897e-36	Cardiac mesoderm progenitors	Chst2
531	6.98005e-39	0.401933	0.917	0.603	1.39601e-35	Cardiac mesoderm progenitors	Nxn
532	3.80209e-38	0.313867	0.663	0.37	7.60417e-35	Cardiac mesoderm progenitors	Phkg1
533	5.25939e-38	0.3776	0.823	0.488	1.05188e-34	Cardiac mesoderm progenitors	Nin
534	5.58871e-38	0.406979	0.809	0.501	1.11774e-34	Cardiac mesoderm progenitors	Cdh11
535	1.41469e-36	0.433904	0.899	0.694	2.82938e-33	Cardiac mesoderm progenitors	Gpc3
536	2.80004e-36	0.347327	0.861	0.597	5.60008e-33	Cardiac mesoderm progenitors	Gata6
537	8.57362e-36	0.348087	0.875	0.603	1.71472e-32	Cardiac mesoderm progenitors	Id1
538	8.06494e-33	0.337563	0.896	0.655	1.61299e-29	Cardiac mesoderm progenitors	Pbx1
539	9.976e-32	0.373538	1	0.968	1.9952e-28	Cardiac mesoderm progenitors	Rps13-ps2
540	8.98613e-31	0.400514	1	0.994	1.79723e-27	Cardiac mesoderm progenitors	Rps3a1
541	1.3635e-30	0.358509	0.965	0.821	2.72701e-27	Cardiac mesoderm progenitors	Actn1
542	1.74358e-30	0.350095	0.844	0.571	3.48716e-27	Cardiac mesoderm progenitors	Smad1
543	6.20123e-30	0.328274	0.726	0.446	1.24025e-26	Cardiac mesoderm progenitors	Zfpm1
544	7.4814e-30	0.350758	0.976	0.829	1.49628e-26	Cardiac mesoderm progenitors	Peg3
545	1.93463e-29	0.321941	0.809	0.489	3.86926e-26	Cardiac mesoderm progenitors	Cdh2
546	2.39247e-29	0.420737	0.774	0.495	4.78493e-26	Cardiac mesoderm progenitors	Frzb
547	2.57085e-29	0.288045	0.993	0.897	5.14171e-26	Cardiac mesoderm progenitors	Tcf7l1
548	5.83529e-29	0.299295	1	0.997	1.16706e-25	Cardiac mesoderm progenitors	Gm10288
549	7.97128e-29	0.392899	1	0.967	1.59426e-25	Cardiac mesoderm progenitors	Gm10263
550	2.18466e-27	0.34897	0.955	0.651	4.36932e-24	Cardiac mesoderm progenitors	Eomes
551	4.9536e-27	0.289626	0.868	0.57	9.9072e-24	Cardiac mesoderm progenitors	Vrtn
552	5.66644e-26	0.334248	0.969	0.872	1.13329e-22	Cardiac mesoderm progenitors	Aplp2
553	1.13045e-25	0.334694	0.927	0.596	2.2609e-22	Cardiac mesoderm progenitors	Mixl1
554	1.98462e-25	0.291	0.847	0.515	3.96923e-22	Cardiac mesoderm progenitors	Sgk1
555	4.88877e-25	0.311156	0.986	0.867	9.77754e-22	Cardiac mesoderm progenitors	Sall4
556	6.31615e-24	0.301883	0.885	0.627	1.26323e-20	Cardiac mesoderm progenitors	Socs2
557	2.39219e-22	0.294662	0.948	0.799	4.78439e-19	Cardiac mesoderm progenitors	Laptm4b
558	1.28544e-20	0.261561	0.979	0.87	2.57087e-17	Cardiac mesoderm progenitors	S100a10
559	3.52822e-19	0.392255	0.656	0.419	7.05645e-16	Cardiac mesoderm progenitors	Msx1
560	6.45803e-18	0.270314	0.844	0.677	1.29161e-14	Cardiac mesoderm progenitors	Flnb
561	1.63629e-17	0.264588	0.875	0.6	3.27259e-14	Cardiac mesoderm progenitors	Sp5
562	7.63612e-140	2.02366	0.953	0.353	1.52722e-136	NMPs	Aldh1a2
563	1.45605e-123	1.57543	0.953	0.296	2.91209e-120	NMPs	Hoxb1
564	4.3947e-94	1.2601	0.962	0.624	8.7894e-91	NMPs	Rbp1
565	5.3972e-91	1.41895	0.815	0.309	1.07944e-87	NMPs	Cdx1
566	2.17736e-89	1.16345	0.882	0.402	4.35472e-86	NMPs	Dll1
567	5.24677e-87	0.776088	0.758	0.171	1.04935e-83	NMPs	Hoxa1
568	5.49976e-87	1.28905	0.986	0.71	1.09995e-83	NMPs	Ifitm1
569	4.71283e-86	1.0055	0.891	0.441	9.42566e-83	NMPs	Pdlim4
570	5.40116e-83	1.27836	0.834	0.33	1.08023e-79	NMPs	Tbx6
571	2.01045e-80	1.0295	0.986	0.891	4.02089e-77	NMPs	Prtg
572	2.45552e-73	1.16972	0.905	0.589	4.91105e-70	NMPs	Crabp1
573	4.48165e-69	0.856685	0.782	0.359	8.9633e-66	NMPs	Meis2
574	2.30461e-68	0.642685	0.995	0.977	4.60921e-65	NMPs	Eno1
575	3.71403e-68	1.00245	0.744	0.234	7.42806e-65	NMPs	Cited1
576	7.05058e-68	0.930626	0.768	0.391	1.41012e-64	NMPs	Pcdh19
577	1.99115e-65	1.20512	0.995	0.861	3.98231e-62	NMPs	Phlda2
578	9.29246e-55	0.65263	0.654	0.207	1.85849e-51	NMPs	Car3
579	1.55902e-53	0.69426	0.754	0.342	3.11805e-50	NMPs	Rspo3
580	9.09516e-53	0.876041	0.853	0.6	1.81903e-49	NMPs	H2ac23
581	8.67624e-52	0.445341	0.555	0.184	1.73525e-48	NMPs	Foxb1
582	2.99647e-48	0.620751	0.63	0.182	5.99294e-45	NMPs	Gbx2
583	3.53528e-48	0.710551	0.626	0.289	7.07056e-45	NMPs	Gal
584	5.51214e-48	0.475918	0.649	0.288	1.10243e-44	NMPs	Rnf213
585	7.68297e-48	0.737995	0.668	0.336	1.53659e-44	NMPs	Hes7
586	5.64275e-47	0.690773	0.948	0.753	1.12855e-43	NMPs	Vim
587	9.18164e-47	0.582441	0.578	0.234	1.83633e-43	NMPs	Arg1
588	1.54643e-43	0.682904	0.91	0.805	3.09285e-40	NMPs	Laptm4b
589	1.894e-43	0.723126	0.9	0.705	3.788e-40	NMPs	Cited2
590	2.24653e-41	0.520295	1	0.968	4.49307e-38	NMPs	Ubb
591	5.02762e-41	0.602302	0.872	0.639	1.00552e-37	NMPs	Igfbp4
592	5.41476e-41	0.615749	0.692	0.377	1.08295e-37	NMPs	Crabp2
593	9.05017e-41	0.648618	0.735	0.425	1.81003e-37	NMPs	Epha4
594	4.69451e-40	0.271419	0.545	0.191	9.38901e-37	NMPs	Cdx2
595	7.90604e-40	0.72961	0.796	0.523	1.58121e-36	NMPs	H2ac24
596	3.42309e-39	0.587554	0.673	0.311	6.84617e-36	NMPs	Zfp703
597	5.91767e-37	0.445691	1	0.909	1.18353e-33	NMPs	Rpl29
598	2.59761e-35	0.493569	0.915	0.799	5.19523e-32	NMPs	Gm47283
599	1.84186e-34	0.53362	0.953	0.834	3.68371e-31	NMPs	Peg3
600	7.90006e-34	0.555491	0.953	0.844	1.58001e-30	NMPs	Fn1
601	1.51548e-32	0.58238	0.787	0.513	3.03095e-29	NMPs	Dll3
602	3.07606e-31	0.46066	0.569	0.297	6.15213e-28	NMPs	Foxc2
603	1.31369e-30	0.384762	0.55	0.274	2.62739e-27	NMPs	Pdzrn3
604	2.03665e-28	0.47181	0.682	0.454	4.07331e-25	NMPs	Tenm4
605	1.58572e-27	0.380827	0.403	0.144	3.17144e-24	NMPs	Ripply2
606	1.21944e-25	0.318066	0.995	0.997	2.43889e-22	NMPs	Cox4i1
607	1.94959e-25	0.511467	0.839	0.62	3.89918e-22	NMPs	Ccnd2
608	1.26721e-24	0.49266	0.716	0.491	2.53441e-21	NMPs	Lef1
609	4.76596e-24	0.431612	0.782	0.508	9.53191e-21	NMPs	Rtl8b
610	2.6893e-23	0.436062	0.863	0.781	5.3786e-20	NMPs	Oat
611	3.40885e-23	0.453527	0.706	0.548	6.8177e-20	NMPs	Epb41l3
612	2.71338e-21	0.344351	1	0.994	5.42675e-18	NMPs	Rps3a1
613	7.47862e-20	0.355053	0.526	0.353	1.49572e-16	NMPs	Prrx2
614	1.55388e-19	0.440361	0.763	0.624	3.10777e-16	NMPs	Mogat2
615	2.14721e-19	0.344872	0.531	0.32	4.29443e-16	NMPs	Rasgrp3
616	7.02461e-19	0.44053	0.654	0.471	1.40492e-15	NMPs	Aplnr
617	3.34769e-16	0.49489	0.777	0.744	6.69538e-13	NMPs	Smc6
618	2.17667e-15	0.3716	0.659	0.479	4.35333e-12	NMPs	Axin2
619	3.00098e-15	0.379083	0.616	0.464	6.00196e-12	NMPs	Fgf15
620	1.39176e-14	0.291676	0.621	0.483	2.78352e-11	NMPs	Gstm5
621	1.95533e-14	0.346918	0.64	0.481	3.91067e-11	NMPs	H2ac8
622	1.98251e-14	0.352468	0.972	0.953	3.96503e-11	NMPs	Tceal8
623	4.75792e-14	0.376268	0.573	0.479	9.51584e-11	NMPs	Pth1r
624	5.81108e-14	0.330395	0.626	0.524	1.16222e-10	NMPs	Pdgfra
625	2.30768e-13	0.394044	0.559	0.395	4.61537e-10	NMPs	Plxna2
626	4.99266e-13	0.26907	0.915	0.889	9.98532e-10	NMPs	Scd2
627	6.08714e-13	0.60869	0.682	0.645	1.21743e-09	NMPs	Grsf1
628	8.46199e-13	0.268869	0.555	0.427	1.6924e-09	NMPs	Twist1
629	1.48157e-12	0.306151	0.493	0.314	2.96313e-09	NMPs	Htra1
630	2.22539e-11	0.251653	0.972	0.962	4.45077e-08	NMPs	Hspa5
631	4.87677e-11	0.250529	0.502	0.374	9.75354e-08	NMPs	Gna14
632	5.69655e-11	0.313907	0.649	0.507	1.13931e-07	NMPs	Gja1
633	3.46027e-10	0.288377	0.768	0.661	6.92055e-07	NMPs	Mycn
634	6.37694e-10	0.386369	0.919	0.88	1.27539e-06	NMPs	Nt5dc2
635	2.24301e-09	0.340318	0.635	0.537	4.48602e-06	NMPs	H4c4
636	2.3465e-09	0.284557	0.469	0.317	4.693e-06	NMPs	Wnt5a
637	3.15248e-09	0.314835	0.735	0.556	6.30495e-06	NMPs	Fst
638	8.40291e-09	0.278218	0.735	0.709	1.68058e-05	NMPs	Gpc3
639	1.10532e-08	0.263418	0.976	0.975	2.21064e-05	NMPs	H2az2
640	1.38316e-08	0.483933	0.735	0.622	2.76632e-05	NMPs	T-Bra
641	1.51305e-07	0.301759	0.673	0.615	0.00030261	NMPs	Lamb1
642	5.96537e-07	0.263305	0.777	0.699	0.00119307	NMPs	Lmo4
643	6.75329e-07	0.286379	0.573	0.49	0.00135066	NMPs	Cdc42ep4
644	6.91177e-06	0.253184	0.483	0.408	0.0138235	NMPs	Inka1
645	0.000204125	0.270121	0.393	0.312	0.40825	NMPs	Smoc1
646	0.00397121	0.250996	0.37	0.289	1	NMPs	Chst7
647	1.69925e-124	1.53566	0.872	0.327	3.3985e-121	DE E6,5/E7,0	Sox17
648	2.58378e-121	1.72324	0.932	0.483	5.16757e-118	DE E6,5/E7,0	Cer1
649	2.29251e-120	1.21333	0.991	0.567	4.58501e-117	DE E6,5/E7,0	Upp1
650	2.58931e-104	1.08751	1	0.953	5.17861e-101	DE E6,5/E7,0	Emb
651	1.1177e-102	1.29615	0.983	0.602	2.2354e-99	DE E6,5/E7,0	Lhx1
652	2.15103e-100	1.22447	0.923	0.387	4.30205e-97	DE E6,5/E7,0	Gsc
653	9.16413e-95	0.845213	0.91	0.459	1.83283e-91	DE E6,5/E7,0	Foxa2
654	7.88309e-94	1.02574	0.962	0.619	1.57662e-90	DE E6,5/E7,0	Otx2
655	3.57824e-84	0.8626	1	0.836	7.15648e-81	DE E6,5/E7,0	Cd24a
656	1.23355e-81	0.87563	0.897	0.508	2.4671e-78	DE E6,5/E7,0	Sfrp1
657	1.61579e-74	0.551971	1	0.986	3.23157e-71	DE E6,5/E7,0	Calm1
658	5.49593e-65	0.695121	0.91	0.52	1.09919e-61	DE E6,5/E7,0	Cldn6
659	1.04226e-61	0.684899	0.915	0.496	2.08452e-58	DE E6,5/E7,0	Fgf8
660	5.88212e-57	0.872818	0.962	0.778	1.17642e-53	DE E6,5/E7,0	Slc16a1
661	2.27424e-54	0.613172	0.855	0.559	4.54848e-51	DE E6,5/E7,0	Sall1
662	1.95739e-53	0.661692	0.991	0.841	3.91477e-50	DE E6,5/E7,0	Car2
663	1.16734e-52	0.576542	1	0.893	2.33469e-49	DE E6,5/E7,0	Larp7
664	3.23905e-51	0.618144	0.855	0.549	6.4781e-48	DE E6,5/E7,0	Lrig3
665	5.17067e-49	0.620798	0.846	0.603	1.03413e-45	DE E6,5/E7,0	Gata6
666	5.32209e-48	0.635172	0.799	0.405	1.06442e-44	DE E6,5/E7,0	Fgf5
667	1.30236e-46	0.600336	0.97	0.772	2.60471e-43	DE E6,5/E7,0	Car4
668	1.14368e-44	0.320688	0.594	0.276	2.28736e-41	DE E6,5/E7,0	Shisa2
669	2.9809e-44	0.454544	0.65	0.286	5.9618e-41	DE E6,5/E7,0	Zc3hav1
670	4.03799e-43	0.481343	0.855	0.491	8.07597e-40	DE E6,5/E7,0	Cdh2
671	5.41722e-43	0.343712	0.547	0.241	1.08344e-39	DE E6,5/E7,0	Prdm1
672	6.5166e-43	0.418804	0.697	0.39	1.30332e-39	DE E6,5/E7,0	Lhx1os
673	2.03845e-42	0.565589	0.795	0.524	4.0769e-39	DE E6,5/E7,0	Ap1s3
674	1.86409e-41	0.43076	0.791	0.491	3.72819e-38	DE E6,5/E7,0	Esrp1
675	6.1388e-41	0.474217	0.885	0.651	1.22776e-37	DE E6,5/E7,0	Krt8
676	4.21895e-40	0.361222	0.594	0.312	8.4379e-37	DE E6,5/E7,0	Samd3
677	1.2914e-38	0.371052	0.594	0.265	2.5828e-35	DE E6,5/E7,0	Ntn1
678	1.31142e-38	0.573281	0.987	0.812	2.62284e-35	DE E6,5/E7,0	Tdgf1
679	1.71108e-38	0.494775	1	0.968	3.42216e-35	DE E6,5/E7,0	Gm10263
680	2.07982e-38	0.359579	1	0.997	4.15964e-35	DE E6,5/E7,0	Gm10288
681	9.31423e-38	0.42588	0.752	0.419	1.86285e-34	DE E6,5/E7,0	Spry4
682	8.5166e-36	0.390581	0.581	0.291	1.70332e-32	DE E6,5/E7,0	Dgkk
683	2.41137e-35	0.414202	1	0.968	4.82274e-32	DE E6,5/E7,0	Rps13-ps2
684	9.98559e-33	0.43349	0.705	0.491	1.99712e-29	DE E6,5/E7,0	Ctsc
685	3.22228e-31	0.367553	0.722	0.455	6.44456e-28	DE E6,5/E7,0	Bmp7
686	3.15887e-30	0.481539	0.885	0.628	6.31773e-27	DE E6,5/E7,0	Cyp26a1
687	1.81407e-29	0.336082	0.821	0.565	3.62814e-26	DE E6,5/E7,0	Pkdcc
688	1.27602e-28	0.384563	0.786	0.595	2.55205e-25	DE E6,5/E7,0	Tcf7l2
689	1.46163e-28	0.337234	0.667	0.426	2.92326e-25	DE E6,5/E7,0	Irx3
690	3.86627e-28	0.345313	0.538	0.297	7.73255e-25	DE E6,5/E7,0	Kit
691	7.96874e-27	0.365171	0.645	0.427	1.59375e-23	DE E6,5/E7,0	Flt1
692	1.25977e-26	0.94843	0.611	0.403	2.51953e-23	DE E6,5/E7,0	Trh
693	5.32674e-26	0.292592	1	0.982	1.06535e-22	DE E6,5/E7,0	Gm8960
694	5.38303e-26	0.515777	0.897	0.813	1.07661e-22	DE E6,5/E7,0	Gm8797
695	2.54573e-25	0.356478	0.543	0.284	5.09146e-22	DE E6,5/E7,0	Fzd5
696	1.28381e-24	0.374497	0.962	0.87	2.56762e-21	DE E6,5/E7,0	Sall4
697	1.55605e-23	0.294998	0.765	0.536	3.1121e-20	DE E6,5/E7,0	Hdac6
698	2.25836e-23	0.40125	0.88	0.73	4.51672e-20	DE E6,5/E7,0	Hes1
699	3.59833e-23	0.637959	0.551	0.318	7.19666e-20	DE E6,5/E7,0	Dkk1
700	3.68048e-23	0.310723	0.944	0.764	7.36096e-20	DE E6,5/E7,0	Id3
701	6.64958e-23	0.343255	0.838	0.612	1.32992e-19	DE E6,5/E7,0	Myc
702	7.08614e-23	0.404399	0.859	0.606	1.41723e-19	DE E6,5/E7,0	Sp5
703	7.83312e-23	0.328228	0.949	0.657	1.56662e-19	DE E6,5/E7,0	Eomes
704	2.02092e-22	0.268101	1	0.99	4.04184e-19	DE E6,5/E7,0	Ubb-ps
705	6.13968e-22	0.302663	0.65	0.458	1.22794e-18	DE E6,5/E7,0	Rbm47
706	7.20045e-22	0.256178	1	0.995	1.44009e-18	DE E6,5/E7,0	Rpl7a-ps7
707	1.59918e-21	0.31241	0.722	0.482	3.19836e-18	DE E6,5/E7,0	Agpat3
708	7.66e-21	0.289602	0.594	0.42	1.532e-17	DE E6,5/E7,0	Wipf3
709	8.61738e-21	0.258914	1	0.971	1.72348e-17	DE E6,5/E7,0	Gm42666
710	3.76841e-20	0.253887	0.679	0.479	7.53682e-17	DE E6,5/E7,0	Cldn7
711	5.78002e-20	0.264381	0.543	0.339	1.156e-16	DE E6,5/E7,0	Eras
712	1.16416e-19	0.25555	0.709	0.5	2.32831e-16	DE E6,5/E7,0	Adam19
713	1.68552e-19	0.274216	0.513	0.28	3.37103e-16	DE E6,5/E7,0	Lzts1
714	2.13051e-19	0.263867	0.987	0.87	4.26102e-16	DE E6,5/E7,0	Bex4
715	1.3691e-16	0.272876	0.791	0.581	2.73821e-13	DE E6,5/E7,0	Vrtn
716	4.43542e-16	0.261289	0.953	0.867	8.87084e-13	DE E6,5/E7,0	Cyb5a
717	6.02023e-15	0.261481	1	0.909	1.20405e-11	DE E6,5/E7,0	Rpl29
718	7.71614e-15	0.306904	0.821	0.609	1.54323e-11	DE E6,5/E7,0	Mixl1
719	1.36485e-13	0.27317	0.799	0.675	2.7297e-10	DE E6,5/E7,0	H1f0
720	2.70943e-12	0.306331	0.543	0.458	5.41885e-09	DE E6,5/E7,0	Bmp2
721	3.64942e-11	0.290383	0.675	0.533	7.29884e-08	DE E6,5/E7,0	Sgk1
722	4.02801e-09	0.257662	0.637	0.555	8.05601e-06	DE E6,5/E7,0	Stmn1
723	9.60285e-08	0.258683	0.782	0.664	0.000192057	DE E6,5/E7,0	Rps19-ps11
724	1.03662e-06	0.385777	0.923	0.922	0.00207323	DE E6,5/E7,0	Rps24-ps3
725	6.87123e-06	0.252069	0.483	0.401	0.0137425	DE E6,5/E7,0	Rps23-ps2
726	2.96408e-05	0.290781	0.756	0.653	0.0592817	DE E6,5/E7,0	Rps4x
727	4.16114e-05	0.324427	0.684	0.599	0.0832227	DE E6,5/E7,0	Gm6988
728	4.714e-05	0.311648	0.662	0.588	0.09428	DE E6,5/E7,0	Gm2225
729	0.000118502	0.301924	0.782	0.683	0.237005	DE E6,5/E7,0	Rps25
730	0.000654933	0.292094	0.778	0.736	1	DE E6,5/E7,0	Gm9701
731	3.70928e-27	2.08094	1	0.71	7.41856e-24	DE E7,75	Krt18
732	1.01944e-24	1.76658	1	0.783	2.03889e-21	DE E7,75	Slc2a3
733	1.17316e-24	1.3666	1	0.956	2.34631e-21	DE E7,75	Emb
734	7.43831e-24	1.79057	0.975	0.663	1.48766e-20	DE E7,75	Krt8
735	2.08044e-23	1.45416	1	0.918	4.16089e-20	DE E7,75	Slc2a1
736	6.82308e-23	1.3218	0.975	0.541	1.36462e-19	DE E7,75	Cldn6
737	1.51346e-22	1.3981	1	0.788	3.02691e-19	DE E7,75	Slc16a1
738	1.99789e-19	0.912237	1	0.845	3.99578e-16	DE E7,75	Cd24a
739	1.9259e-17	0.818288	0.575	0.148	3.85181e-14	DE E7,75	Gpx2
740	1.03299e-15	0.937872	0.9	0.616	2.06599e-12	DE E7,75	Podxl
741	5.24716e-14	1.487	0.75	0.413	1.04943e-10	DE E7,75	Trh
742	2.60295e-13	0.596335	1	0.978	5.2059e-10	DE E7,75	Eno1
743	9.06639e-11	1.22555	0.75	0.51	1.81328e-07	DE E7,75	Cer1
744	1.144e-10	0.997378	0.775	0.63	2.28801e-07	DE E7,75	Wfdc2
745	1.29508e-10	0.786526	0.475	0.16	2.59016e-07	DE E7,75	Igfbp5
746	1.5478e-10	0.893644	0.875	0.784	3.0956e-07	DE E7,75	Car4
747	2.68261e-10	0.768026	0.85	0.678	5.36522e-07	DE E7,75	Cdh1
748	1.63696e-09	0.621594	0.65	0.373	3.27392e-06	DE E7,75	Crb3
749	2.10422e-09	0.649662	0.85	0.744	4.20844e-06	DE E7,75	Sparc
750	2.53366e-09	0.643769	0.625	0.333	5.06732e-06	DE E7,75	Trp53i11
751	4.22482e-09	0.722744	0.75	0.549	8.44964e-06	DE E7,75	Hdac6
752	6.70918e-09	0.472128	1	0.914	1.34184e-05	DE E7,75	Rpl29
753	3.20677e-08	0.51988	0.575	0.308	6.41353e-05	DE E7,75	Dgkk
754	4.7113e-08	0.50309	0.975	0.962	9.4226e-05	DE E7,75	Hspa5
755	7.48787e-08	0.988498	0.825	0.776	0.000149757	DE E7,75	Id3
756	7.62584e-08	0.905978	0.75	0.624	0.000152517	DE E7,75	Id1
757	8.15911e-08	0.507916	0.75	0.526	0.000163182	DE E7,75	Cd9
758	1.39173e-07	0.627118	0.95	0.868	0.000278346	DE E7,75	Apoe
759	1.86217e-07	0.552363	0.75	0.537	0.000372434	DE E7,75	H2ac24
760	1.95907e-07	0.314932	1	0.995	0.000391814	DE E7,75	Rps3a1
761	7.82326e-07	0.415955	1	0.983	0.00156465	DE E7,75	Tceal9
762	1.02976e-06	0.482712	0.975	0.916	0.00205953	DE E7,75	Bex1
763	1.93191e-06	0.368189	1	0.969	0.00386383	DE E7,75	Ubb
764	2.06842e-06	0.350842	1	0.987	0.00413684	DE E7,75	Calm1
765	2.29959e-06	0.690226	0.6	0.451	0.00459918	DE E7,75	Prxl2a
766	2.51913e-06	0.462351	0.875	0.776	0.00503826	DE E7,75	Tagln2
767	2.61802e-06	0.331997	1	0.997	0.00523604	DE E7,75	Cox4i1
768	2.73215e-06	0.799973	0.5	0.297	0.00546429	DE E7,75	Cpm
769	3.50716e-06	0.645709	0.725	0.613	0.00701432	DE E7,75	H2ac23
770	6.89933e-06	0.55845	0.45	0.262	0.0137987	DE E7,75	Cited1
771	7.19763e-06	0.577346	0.625	0.491	0.0143953	DE E7,75	Cldn7
772	9.67394e-06	0.584346	0.55	0.41	0.0193479	DE E7,75	Pdgfa
773	1.54829e-05	0.259057	1	0.994	0.0309657	DE E7,75	Prdx2
774	1.58481e-05	0.601159	0.725	0.633	0.0316962	DE E7,75	Ccnd2
775	2.11803e-05	0.393745	0.725	0.56	0.0423605	DE E7,75	Commd3
776	2.44379e-05	0.793794	0.65	0.581	0.0488758	DE E7,75	Pkdcc
777	3.6282e-05	0.437008	0.6	0.463	0.072564	DE E7,75	Cotl1
778	4.50309e-05	0.747362	0.525	0.361	0.0900618	DE E7,75	Sox17
779	6.89152e-05	0.540365	0.55	0.438	0.13783	DE E7,75	Rab25
780	6.89436e-05	0.449254	0.975	0.975	0.137887	DE E7,75	H2az2
781	8.84505e-05	0.42042	0.925	0.865	0.176901	DE E7,75	Arl6ip1
782	8.84884e-05	0.462763	0.75	0.736	0.176977	DE E7,75	Csrp2
783	9.65571e-05	0.470246	0.5	0.391	0.193114	DE E7,75	Gprc5c
784	0.000143541	0.470447	0.925	0.877	0.287081	DE E7,75	Bex4
785	0.000328206	0.3113	0.9	0.84	0.656412	DE E7,75	Peg3
786	0.000504867	0.331628	1	0.987	1	DE E7,75	Uqcrq
787	0.000660176	0.650906	0.625	0.643	1	DE E7,75	Ptch1
788	0.000834584	0.534213	0.575	0.488	1	DE E7,75	Foxa2
789	0.000843279	0.476957	0.6	0.533	1	DE E7,75	Sfrp1
790	0.000942278	0.544843	0.425	0.329	1	DE E7,75	Flrt3
791	0.00107712	0.379601	0.8	0.806	1	DE E7,75	Gm47283
792	0.00129616	0.336822	0.5	0.42	1	DE E7,75	Grb7
793	0.00151766	0.628546	0.3	0.183	1	DE E7,75	Sox9
794	0.00163449	0.338614	0.75	0.714	1	DE E7,75	Cnn2
795	0.00185674	0.625392	0.575	0.542	1	DE E7,75	Ap1s3
796	0.0019732	0.359087	0.35	0.279	1	DE E7,75	Lima1
797	0.00228431	0.339743	0.75	0.753	1	DE E7,75	H19
798	0.00236015	0.498865	0.55	0.531	1	DE E7,75	Col4a1
799	0.00328863	0.491675	0.6	0.608	1	DE E7,75	Tcf7l2
800	0.00504226	0.649152	0.375	0.333	1	DE E7,75	Dkk1
801	0.00529919	0.387472	0.675	0.643	1	DE E7,75	Ezr
802	0.00774301	0.330079	0.65	0.671	1	DE E7,75	Tmem88
803	3.18526e-69	1.20089	0.9	0.592	6.37053e-66	Cardio-pharyngeal mesoderm	Crabp1
804	3.63827e-66	0.753946	0.989	0.978	7.27655e-63	Cardio-pharyngeal mesoderm	Eno1
805	7.93466e-59	0.844623	0.967	0.742	1.58693e-55	Cardio-pharyngeal mesoderm	H19
806	5.38602e-57	0.935363	0.967	0.714	1.0772e-53	Cardio-pharyngeal mesoderm	Ifitm1
807	8.94299e-53	0.728835	0.994	0.891	1.7886e-49	Cardio-pharyngeal mesoderm	Prtg
808	2.90295e-43	0.719705	0.794	0.544	5.8059e-40	Cardio-pharyngeal mesoderm	Epb41l3
809	7.31038e-43	0.509719	1	0.91	1.46208e-39	Cardio-pharyngeal mesoderm	Rpl29
810	9.79432e-42	0.927706	0.767	0.521	1.95886e-38	Cardio-pharyngeal mesoderm	Sfrp1
811	1.59376e-39	0.613908	0.956	0.841	3.18752e-36	Cardio-pharyngeal mesoderm	Cd24a
812	4.84789e-39	0.799143	0.978	0.864	9.69577e-36	Cardio-pharyngeal mesoderm	Phlda2
813	1.59095e-38	0.637654	0.944	0.864	3.1819e-35	Cardio-pharyngeal mesoderm	Apoe
814	2.19868e-38	0.615913	0.839	0.641	4.39737e-35	Cardio-pharyngeal mesoderm	Dusp9
815	2.58283e-38	0.956077	0.767	0.57	5.16566e-35	Cardio-pharyngeal mesoderm	Ppp1r1a
816	7.67888e-36	0.826464	0.65	0.383	1.53578e-32	Cardio-pharyngeal mesoderm	Crabp2
817	2.65253e-34	0.764758	0.656	0.422	5.30505e-31	Cardio-pharyngeal mesoderm	Twist1
818	1.29701e-32	0.820033	0.778	0.606	2.59401e-29	Cardio-pharyngeal mesoderm	H2ac23
819	2.30752e-31	0.710766	0.75	0.528	4.61505e-28	Cardio-pharyngeal mesoderm	H2ac24
820	6.22022e-31	0.465879	0.994	0.968	1.24404e-27	Cardio-pharyngeal mesoderm	Ubb
821	8.87374e-30	1.04259	0.539	0.301	1.77475e-26	Cardio-pharyngeal mesoderm	Tcf15
822	6.05557e-29	0.600176	0.539	0.293	1.21111e-25	Cardio-pharyngeal mesoderm	Irx5
823	3.32725e-27	0.311929	0.994	0.995	6.6545e-24	Cardio-pharyngeal mesoderm	Rps3a1
824	1.16616e-26	0.826558	0.839	0.773	2.33231e-23	Cardio-pharyngeal mesoderm	Id3
825	3.6947e-25	0.300224	0.978	0.916	7.38941e-22	Cardio-pharyngeal mesoderm	Slc2a1
826	3.32611e-22	0.64602	0.539	0.353	6.65223e-19	Cardio-pharyngeal mesoderm	Prrx2
827	1.12507e-21	0.583321	0.517	0.327	2.25013e-18	Cardio-pharyngeal mesoderm	Trp53i11
828	2.75267e-21	0.301112	1	0.999	5.50534e-18	Cardio-pharyngeal mesoderm	Hspa8
829	5.37773e-21	0.585687	0.7	0.58	1.07555e-17	Cardio-pharyngeal mesoderm	Myl7
830	8.87869e-20	0.474691	0.867	0.808	1.77574e-16	Cardio-pharyngeal mesoderm	Laptm4b
831	5.51375e-19	0.48698	0.839	0.804	1.10275e-15	Cardio-pharyngeal mesoderm	Gm47283
832	4.13297e-18	0.463833	0.8	0.733	8.26594e-15	Cardio-pharyngeal mesoderm	Csrp2
833	7.10409e-17	0.584434	0.478	0.304	1.42082e-13	Cardio-pharyngeal mesoderm	Foxc2
834	4.616e-16	0.500842	0.511	0.386	9.232e-13	Cardio-pharyngeal mesoderm	Cpa2
835	1.45168e-14	0.337935	0.944	0.933	2.90336e-11	Cardio-pharyngeal mesoderm	Rbbp7
836	3.02328e-14	0.327936	0.928	0.846	6.04657e-11	Cardio-pharyngeal mesoderm	Fn1
837	3.86542e-14	0.267563	0.994	0.997	7.73083e-11	Cardio-pharyngeal mesoderm	Cox4i1
838	7.83772e-14	0.476433	0.633	0.579	1.56754e-10	Cardio-pharyngeal mesoderm	Pkdcc
839	1.18673e-12	0.354033	0.711	0.669	2.37347e-09	Cardio-pharyngeal mesoderm	Tmem88
840	1.21933e-11	0.448875	0.444	0.328	2.43866e-08	Cardio-pharyngeal mesoderm	Irx1
841	1.23901e-11	0.472385	0.917	0.88	2.47802e-08	Cardio-pharyngeal mesoderm	Nt5dc2
842	1.46788e-11	0.523281	0.522	0.463	2.93576e-08	Cardio-pharyngeal mesoderm	Cdkn1c
843	1.58095e-11	0.783703	0.556	0.52	3.16191e-08	Cardio-pharyngeal mesoderm	Id2
844	2.51371e-11	0.404205	0.539	0.465	5.02742e-08	Cardio-pharyngeal mesoderm	Pdlim4
845	5.38438e-11	0.425239	0.683	0.666	1.07688e-07	Cardio-pharyngeal mesoderm	Mycn
846	8.05085e-11	0.45903	0.317	0.193	1.61017e-07	Cardio-pharyngeal mesoderm	Alx1
847	1.57099e-10	0.398278	0.511	0.438	3.14198e-07	Cardio-pharyngeal mesoderm	Irx3
848	5.15046e-10	0.306074	0.983	0.975	1.03009e-06	Cardio-pharyngeal mesoderm	H2az2
849	1.12091e-09	0.320925	0.85	0.84	2.24181e-06	Cardio-pharyngeal mesoderm	Peg3
850	1.18903e-08	0.311184	0.561	0.53	2.37807e-05	Cardio-pharyngeal mesoderm	Col4a1
851	6.22609e-08	0.341775	0.533	0.502	0.000124522	Cardio-pharyngeal mesoderm	Mid1ip1
852	1.55487e-07	0.292635	0.517	0.49	0.000310974	Cardio-pharyngeal mesoderm	H2ac8
853	1.87106e-07	0.363722	0.278	0.18	0.000374212	Cardio-pharyngeal mesoderm	Ptgds
854	6.37488e-07	0.267178	0.628	0.633	0.00127498	Cardio-pharyngeal mesoderm	Mogat2
855	9.11764e-07	0.340174	0.672	0.705	0.00182353	Cardio-pharyngeal mesoderm	Lmo4
856	9.73496e-07	0.338245	0.472	0.469	0.00194699	Cardio-pharyngeal mesoderm	Myrf
857	1.75701e-06	0.276178	0.628	0.634	0.00351403	Cardio-pharyngeal mesoderm	Ccnd2
858	2.01802e-06	0.282828	0.383	0.368	0.00403604	Cardio-pharyngeal mesoderm	Efnb1
859	2.21655e-06	0.261475	0.667	0.675	0.0044331	Cardio-pharyngeal mesoderm	Pbx1
860	2.35101e-06	0.377157	0.35	0.335	0.00470202	Cardio-pharyngeal mesoderm	Hoxb1
861	6.15648e-06	0.29963	0.339	0.317	0.012313	Cardio-pharyngeal mesoderm	Foxc1
862	8.36815e-06	0.359815	0.511	0.531	0.0167363	Cardio-pharyngeal mesoderm	Pdgfra
863	8.61055e-06	0.296996	0.267	0.249	0.0172211	Cardio-pharyngeal mesoderm	Nbl1
864	3.32723e-05	0.3092	0.278	0.254	0.0665445	Cardio-pharyngeal mesoderm	Arg1
865	4.20152e-05	0.51481	0.561	0.629	0.0840305	Cardio-pharyngeal mesoderm	Id1
866	7.75513e-05	0.257156	0.417	0.387	0.155103	Cardio-pharyngeal mesoderm	Aldh1a2
867	0.000103838	0.335669	0.389	0.41	0.207676	Cardio-pharyngeal mesoderm	Phlda1
868	0.000109942	0.312788	0.489	0.52	0.219883	Cardio-pharyngeal mesoderm	Cald1
869	0.000114838	0.275715	0.539	0.571	0.229676	Cardio-pharyngeal mesoderm	Lrig3
870	0.000423821	0.25127	0.583	0.631	0.847641	Cardio-pharyngeal mesoderm	Nxn
871	0.000870414	0.305183	0.472	0.515	1	Cardio-pharyngeal mesoderm	Cer1
872	0.00105254	0.374764	0.406	0.455	1	Cardio-pharyngeal mesoderm	Prxl2a
873	0.00193237	0.286857	0.389	0.447	1	Cardio-pharyngeal mesoderm	Epha4
874	5.75083e-67	1.87103	0.971	0.451	1.15017e-63	Cardio-vascular progenitors	Pmp22
875	2.10107e-65	1.81236	0.99	0.515	4.20215e-62	Cardio-vascular progenitors	Hand1
876	2.99706e-60	1.91523	1	0.916	5.99411e-57	Cardio-vascular progenitors	Slc2a1
877	3.04659e-60	1.44399	0.99	0.729	6.09318e-57	Cardio-vascular progenitors	Csrp2
878	4.81883e-60	1.69608	1	0.705	9.63767e-57	Cardio-vascular progenitors	Krt18
879	2.49656e-59	1.77893	1	0.746	4.99311e-56	Cardio-vascular progenitors	H19
880	3.37603e-59	1.51898	1	0.657	6.75207e-56	Cardio-vascular progenitors	Krt8
881	2.08556e-57	1.40898	1	0.757	4.17111e-54	Cardio-vascular progenitors	Vim
882	1.12054e-55	1.34024	0.98	0.662	2.24108e-52	Cardio-vascular progenitors	Tmem88
883	1.18725e-55	1.43632	0.892	0.332	2.3745e-52	Cardio-vascular progenitors	Ahnak
884	5.18658e-54	1.62903	0.922	0.5	1.03732e-50	Cardio-vascular progenitors	Spin2c
885	1.88554e-49	1.31699	0.941	0.609	3.77107e-46	Cardio-vascular progenitors	Podxl
886	6.43955e-47	0.8829	1	0.983	1.28791e-43	Cardio-vascular progenitors	Tceal9
887	1.81065e-45	0.478895	1	1	3.62131e-42	Cardio-vascular progenitors	Actb
888	1.27089e-43	1.39985	1	0.865	2.54178e-40	Cardio-vascular progenitors	Phlda2
889	1.0494e-41	0.897765	0.99	0.932	2.0988e-38	Cardio-vascular progenitors	Rbbp7
890	4.91015e-41	0.709449	0.49	0.08	9.82031e-38	Cardio-vascular progenitors	Tnnt2
891	1.96196e-40	0.875254	0.725	0.258	3.92392e-37	Cardio-vascular progenitors	Stard8
892	2.10513e-38	1.20709	0.931	0.708	4.21025e-35	Cardio-vascular progenitors	Cnn2
893	1.53624e-37	0.910567	0.843	0.454	3.07247e-34	Cardio-vascular progenitors	Msx2
894	1.28986e-36	0.810136	0.775	0.388	2.57972e-33	Cardio-vascular progenitors	Foxf1
895	2.03941e-36	0.656881	1	0.978	4.07883e-33	Cardio-vascular progenitors	Eno1
896	6.86601e-35	0.786306	1	0.893	1.3732e-31	Cardio-vascular progenitors	Prtg
897	2.51726e-34	0.958822	0.941	0.781	5.03453e-31	Cardio-vascular progenitors	Car4
898	1.12122e-32	0.908234	0.873	0.646	2.24245e-29	Cardio-vascular progenitors	Ppic
899	1.88984e-31	0.737542	0.804	0.455	3.77968e-28	Cardio-vascular progenitors	Polg
900	1.9514e-30	0.617463	0.99	0.99	3.9028e-27	Cardio-vascular progenitors	Bex3
901	1.01651e-29	0.660383	0.98	0.903	2.03302e-26	Cardio-vascular progenitors	Tpm1
902	2.53675e-27	0.849606	0.725	0.425	5.07351e-24	Cardio-vascular progenitors	Bmp4
903	5.3452e-27	0.734176	0.961	0.771	1.06904e-23	Cardio-vascular progenitors	Id3
904	6.81703e-27	1.52697	0.627	0.294	1.36341e-23	Cardio-vascular progenitors	Acta2
905	3.0518e-26	0.532825	0.451	0.105	6.10359e-23	Cardio-vascular progenitors	Epas1
906	4.95141e-26	0.915515	0.618	0.253	9.90281e-23	Cardio-vascular progenitors	Tagln
907	5.51515e-25	0.728731	0.706	0.38	1.10303e-21	Cardio-vascular progenitors	Csrp1
908	6.61335e-25	0.839354	0.716	0.406	1.32267e-21	Cardio-vascular progenitors	Anxa2
909	3.3272e-22	0.805115	0.686	0.439	6.6544e-19	Cardio-vascular progenitors	Hsd11b2
910	3.49236e-22	0.580616	0.569	0.245	6.98471e-19	Cardio-vascular progenitors	Nrp1
911	6.2598e-22	0.521926	0.451	0.143	1.25196e-18	Cardio-vascular progenitors	Snai2
912	7.66387e-22	0.628851	0.775	0.465	1.53277e-18	Cardio-vascular progenitors	Peg10
913	4.68571e-21	0.759347	0.716	0.43	9.37142e-18	Cardio-vascular progenitors	Msx1
914	3.40163e-20	0.88892	0.539	0.256	6.80326e-17	Cardio-vascular progenitors	Col1a1
915	6.51704e-20	0.47306	0.98	0.962	1.30341e-16	Cardio-vascular progenitors	Hspa5
916	2.08672e-19	0.650835	0.814	0.609	4.17345e-16	Cardio-vascular progenitors	H2ac23
917	2.87249e-19	0.605419	0.863	0.742	5.74498e-16	Cardio-vascular progenitors	Sparc
918	5.84815e-18	0.622352	0.843	0.64	1.16963e-14	Cardio-vascular progenitors	Pdlim7
919	9.36784e-18	0.600056	0.784	0.647	1.87357e-14	Cardio-vascular progenitors	Dusp9
920	1.39455e-17	0.473419	0.99	0.945	2.78909e-14	Cardio-vascular progenitors	Tuba1a
921	3.44063e-17	0.437245	1	0.969	6.88127e-14	Cardio-vascular progenitors	Ubb
922	3.50631e-17	0.788241	0.755	0.639	7.01262e-14	Cardio-vascular progenitors	Ptch1
923	6.72118e-17	0.709022	0.637	0.436	1.34424e-13	Cardio-vascular progenitors	Pard6b
924	7.66789e-17	0.617082	0.686	0.46	1.53358e-13	Cardio-vascular progenitors	Cdkn1c
925	1.41621e-16	0.433196	0.99	0.953	2.83243e-13	Cardio-vascular progenitors	Tceal8
926	5.65633e-16	0.532862	0.941	0.838	1.13127e-12	Cardio-vascular progenitors	Peg3
927	1.49615e-15	0.527942	0.843	0.648	2.99231e-12	Cardio-vascular progenitors	Igfbp4
928	2.23722e-15	0.535621	0.608	0.4	4.47443e-12	Cardio-vascular progenitors	Frmd6
929	3.033e-15	0.510647	0.775	0.603	6.066e-12	Cardio-vascular progenitors	Crabp1
930	3.50657e-14	0.383194	0.314	0.114	7.01313e-11	Cardio-vascular progenitors	Tnnc1
931	4.64046e-14	0.318979	0.304	0.095	9.28092e-11	Cardio-vascular progenitors	Popdc2
932	1.12396e-13	0.415122	1	0.912	2.24793e-10	Cardio-vascular progenitors	Rpl29
933	1.26004e-13	0.349256	1	0.967	2.52009e-10	Cardio-vascular progenitors	Ubc
934	1.7811e-13	0.510438	0.784	0.629	3.5622e-10	Cardio-vascular progenitors	Ccnd2
935	1.8546e-13	0.665159	0.51	0.294	3.70921e-10	Cardio-vascular progenitors	Capn6
936	3.26083e-13	0.557001	0.51	0.325	6.52166e-10	Cardio-vascular progenitors	Tspan9
937	1.29463e-12	0.421609	0.941	0.866	2.58927e-09	Cardio-vascular progenitors	Apoe
938	2.60389e-12	0.601805	0.696	0.535	5.20778e-09	Cardio-vascular progenitors	H2ac24
939	3.91743e-12	0.373713	0.373	0.166	7.83486e-09	Cardio-vascular progenitors	Plac1
940	4.5551e-12	0.345312	0.824	0.675	9.11019e-09	Cardio-vascular progenitors	Ftl1
941	1.0973e-11	0.538427	0.52	0.364	2.19461e-08	Cardio-vascular progenitors	Efnb1
942	1.70034e-11	0.624178	0.451	0.297	3.40069e-08	Cardio-vascular progenitors	Myl9
943	8.50041e-11	0.422883	0.51	0.371	1.70008e-07	Cardio-vascular progenitors	Anxa6
944	1.73472e-10	0.427608	0.892	0.783	3.46944e-07	Cardio-vascular progenitors	Slc2a3
945	1.7899e-10	0.580864	0.745	0.638	3.5798e-07	Cardio-vascular progenitors	Lgals1
946	1.86322e-10	0.528751	0.569	0.443	3.72645e-07	Cardio-vascular progenitors	Prdm6
947	5.63367e-10	0.512373	0.539	0.422	1.12673e-06	Cardio-vascular progenitors	Mest
948	5.92157e-10	0.444888	0.618	0.5	1.18431e-06	Cardio-vascular progenitors	Mid1ip1
949	6.87192e-10	0.39947	0.353	0.224	1.37438e-06	Cardio-vascular progenitors	Fhl2
950	9.13287e-10	0.507737	0.627	0.544	1.82657e-06	Cardio-vascular progenitors	Pdlim1
951	1.21115e-09	0.43579	0.892	0.878	2.4223e-06	Cardio-vascular progenitors	S100a10
952	1.74195e-09	0.389205	0.833	0.805	3.48391e-06	Cardio-vascular progenitors	Gm47283
953	2.52587e-09	0.378212	0.363	0.185	5.05173e-06	Cardio-vascular progenitors	Tnni1
954	8.22064e-09	0.327998	0.382	0.228	1.64413e-05	Cardio-vascular progenitors	C430049B03Rik
955	4.31369e-08	0.428971	0.431	0.319	8.62739e-05	Cardio-vascular progenitors	Pkp2
956	4.88827e-08	0.391043	0.275	0.167	9.77654e-05	Cardio-vascular progenitors	Actc1
957	1.38899e-07	0.380064	0.686	0.6	0.000277798	Cardio-vascular progenitors	Crip2
958	2.93776e-07	0.386114	0.706	0.664	0.000587553	Cardio-vascular progenitors	Amotl2
959	3.13975e-07	0.386528	0.686	0.631	0.000627949	Cardio-vascular progenitors	Mogat2
960	5.00131e-07	0.419797	0.559	0.523	0.00100026	Cardio-vascular progenitors	Gpx3
961	9.32744e-07	0.409335	0.422	0.333	0.00186549	Cardio-vascular progenitors	Vasn
962	1.29891e-06	0.404882	0.922	0.917	0.00259781	Cardio-vascular progenitors	Bex1
963	7.34064e-06	0.783574	0.608	0.585	0.0146813	Cardio-vascular progenitors	Myl7
964	9.38317e-06	0.768014	0.569	0.56	0.0187663	Cardio-vascular progenitors	Gm10800
965	1.90816e-05	0.433226	0.539	0.518	0.0381631	Cardio-vascular progenitors	Cald1
966	4.35861e-05	0.419252	0.431	0.37	0.0871722	Cardio-vascular progenitors	Gadd45g
967	4.84287e-05	0.344645	0.99	0.987	0.0968573	Cardio-vascular progenitors	Uqcrq
968	8.54904e-05	0.399662	0.549	0.557	0.170981	Cardio-vascular progenitors	Klf6
969	0.000211393	0.389662	0.48	0.468	0.422786	Cardio-vascular progenitors	Myrf
970	0.000324456	0.486981	0.853	0.883	0.648911	Cardio-vascular progenitors	Nt5dc2
971	0.00115467	0.321286	0.324	0.29	1	Cardio-vascular progenitors	Frem1
972	0.00232856	0.326783	0.373	0.381	1	Cardio-vascular progenitors	Arl4c
973	0.00576056	0.340936	0.441	0.474	1	Cardio-vascular progenitors	Fgf15
974	6.68094e-30	1.46809	1	0.749	1.33619e-26	Endothelial cells	H19
975	6.10234e-26	1.21003	0.825	0.365	1.22047e-22	Endothelial cells	Gadd45g
976	9.81827e-25	0.965341	0.719	0.272	1.96365e-21	Endothelial cells	Tal1
977	3.56849e-23	1.12199	0.825	0.402	7.13698e-20	Endothelial cells	Phlda1
978	4.46119e-23	1.01894	0.737	0.249	8.92239e-20	Endothelial cells	Lmo2
979	4.34656e-22	0.700012	1	0.978	8.69312e-19	Endothelial cells	Eno1
980	4.62588e-22	1.28689	0.877	0.577	9.25176e-19	Endothelial cells	Kdr
981	5.30867e-21	1.09913	0.842	0.549	1.06173e-17	Endothelial cells	F2r
982	1.32755e-20	1.23654	0.877	0.65	2.65511e-17	Endothelial cells	Igfbp4
983	5.94861e-20	0.826313	0.895	0.614	1.18972e-16	Endothelial cells	Podxl
984	7.33649e-20	1.1262	0.825	0.542	1.4673e-16	Endothelial cells	Egfl7
985	6.20016e-19	1.06715	0.947	0.867	1.24003e-15	Endothelial cells	Apoe
986	8.0978e-19	0.923624	0.947	0.761	1.61956e-15	Endothelial cells	Vim
987	1.19762e-16	0.789553	0.737	0.407	2.39525e-13	Endothelial cells	Inka1
988	1.32121e-15	0.880419	0.965	0.773	2.64242e-12	Endothelial cells	Id3
989	5.62035e-15	0.991236	0.684	0.4	1.12407e-11	Endothelial cells	Ramp2
990	2.55369e-14	0.89092	0.649	0.354	5.10738e-11	Endothelial cells	Gata2
991	1.38833e-13	1.28095	0.719	0.501	2.77666e-10	Endothelial cells	Etv2
992	2.58255e-13	0.498312	1	0.969	5.1651e-10	Endothelial cells	Ubb
993	5.04801e-13	0.981889	0.772	0.578	1.0096e-09	Endothelial cells	Fgf3
994	6.35892e-13	0.859864	0.789	0.599	1.27178e-09	Endothelial cells	Crip2
995	1.51703e-12	0.445543	1	0.913	3.03406e-09	Endothelial cells	Rpl29
996	2.09135e-12	0.340434	1	0.994	4.18271e-09	Endothelial cells	Rps3a1
997	2.51523e-11	0.683106	0.667	0.442	5.03046e-08	Endothelial cells	Hsd11b2
998	2.56824e-11	0.517576	0.842	0.65	5.13647e-08	Endothelial cells	Ppic
999	4.29789e-11	0.690709	0.614	0.362	8.59577e-08	Endothelial cells	Rspo3
1000	4.54444e-11	0.66497	0.772	0.612	9.08888e-08	Endothelial cells	H2ac23
1001	3.07608e-10	0.527202	0.614	0.371	6.15216e-07	Endothelial cells	Anxa6
1002	8.1739e-10	0.588422	0.667	0.462	1.63478e-06	Endothelial cells	Polg
1003	1.00673e-09	0.522402	0.368	0.13	2.01346e-06	Endothelial cells	Hapln1
1004	4.51268e-09	0.475516	0.86	0.712	9.02535e-06	Endothelial cells	Cnn2
1005	4.58025e-09	0.312951	1	0.999	9.16051e-06	Endothelial cells	Hspa8
1006	9.0414e-09	0.707133	0.561	0.378	1.80828e-05	Endothelial cells	Rnd2
1007	1.84359e-08	0.495412	0.93	0.804	3.68718e-05	Endothelial cells	Gm47283
1008	3.58446e-08	0.511667	0.789	0.631	7.16891e-05	Endothelial cells	Ccnd2
1009	1.27847e-07	0.499246	0.684	0.537	0.000255694	Endothelial cells	H2ac24
1010	1.28581e-07	0.686963	0.386	0.179	0.000257162	Endothelial cells	Sox18
1011	1.63604e-07	0.320881	0.316	0.149	0.000327209	Endothelial cells	Dusp2
1012	1.80182e-07	0.253344	0.965	0.918	0.000360363	Endothelial cells	Slc2a1
1013	2.43239e-07	0.490049	0.421	0.224	0.000486478	Endothelial cells	Cbfa2t3
1014	8.88279e-07	0.314608	0.982	0.968	0.00177656	Endothelial cells	Ubc
1015	9.59655e-07	0.330434	1	0.997	0.00191931	Endothelial cells	Cox4i1
1016	1.00073e-06	0.38041	0.807	0.677	0.00200147	Endothelial cells	Ftl1
1017	1.07312e-06	0.571765	0.561	0.44	0.00214625	Endothelial cells	Flt1
1018	1.75732e-06	0.532124	0.737	0.717	0.00351464	Endothelial cells	Cited2
1019	2.9131e-06	0.440267	0.298	0.187	0.00582621	Endothelial cells	Shank3
1020	3.29124e-06	0.463984	0.632	0.53	0.00658249	Endothelial cells	Col4a1
1021	3.49104e-06	0.454481	0.614	0.48	0.00698208	Endothelial cells	Aplnr
1022	6.1989e-06	0.281675	0.298	0.135	0.0123978	Endothelial cells	Wnk4
1023	7.71408e-06	0.485122	0.947	0.868	0.0154282	Endothelial cells	Phlda2
1024	1.3486e-05	0.327428	0.807	0.744	0.0269719	Endothelial cells	Sparc
1025	1.80659e-05	0.367943	0.544	0.412	0.0361318	Endothelial cells	Anxa2
1026	1.86573e-05	0.325253	0.982	0.987	0.0373146	Endothelial cells	Uqcrq
1027	2.56951e-05	0.437113	0.93	0.881	0.0513901	Endothelial cells	Nt5dc2
1028	5.27758e-05	0.316507	0.421	0.314	0.105552	Endothelial cells	Nrp2
1029	6.52054e-05	0.350735	0.263	0.137	0.130411	Endothelial cells	Clic6
1030	0.000123182	0.292583	0.895	0.826	0.246365	Endothelial cells	Tacc3
1031	0.000163183	0.476351	0.421	0.298	0.326366	Endothelial cells	Capn6
1032	0.000163713	0.268321	0.842	0.725	0.327426	Endothelial cells	Ifitm1
1033	0.000266147	0.273233	0.912	0.896	0.532293	Endothelial cells	Prtg
1034	0.000284769	0.296126	0.947	0.963	0.569538	Endothelial cells	Hspa5
1035	0.000382445	0.30581	0.404	0.33	0.764891	Endothelial cells	Tgfb1
1036	0.000478234	0.726764	0.596	0.586	0.956468	Endothelial cells	Myl7
1037	0.000513514	0.508027	0.509	0.468	1	Endothelial cells	Zfpm1
1038	0.000768559	0.25863	0.895	0.832	1	Endothelial cells	Actn1
1039	0.00118417	0.274807	0.404	0.359	1	Endothelial cells	Slc29a1
1040	0.00193013	0.34852	0.404	0.363	1	Endothelial cells	Irs2
1041	0.00193179	0.399055	0.421	0.395	1	Endothelial cells	Pfkp
1042	0.00199383	0.27254	0.649	0.625	1	Endothelial cells	Id1
1043	0.00235246	0.369288	0.456	0.422	1	Endothelial cells	Smtnl2
1044	0.00291586	0.330952	0.298	0.239	1	Endothelial cells	Npl
1045	0.00292501	0.330097	0.702	0.68	1	Endothelial cells	Kif23
1046	0.00315087	0.299172	0.351	0.27	1	Endothelial cells	Stard8
1047	0.00388932	0.579974	0.474	0.464	1	Endothelial cells	Bmp2
1048	0.00420616	0.255454	0.474	0.45	1	Endothelial cells	Rbm38
1049	0.00490843	0.266198	0.667	0.627	1	Endothelial cells	Myc
1050	0.00943374	0.369586	0.404	0.383	1	Endothelial cells	Ets1
1051	2.16955e-74	1.14137	0.903	0.564	4.3391e-71	Extra-embryonic mesoderm	Kdr
1052	1.58149e-62	0.775811	0.941	0.637	3.16297e-59	Extra-embryonic mesoderm	Ppic
1053	1.1599e-56	0.808782	0.785	0.443	2.31981e-53	Extra-embryonic mesoderm	Tbx3
1054	6.22971e-55	0.9349	0.925	0.638	1.24594e-51	Extra-embryonic mesoderm	Igfbp4
1055	3.75271e-49	0.915627	0.995	0.918	7.50542e-46	Extra-embryonic mesoderm	Rps24-ps3
1056	5.43246e-49	1.1061	0.796	0.456	1.08649e-45	Extra-embryonic mesoderm	Peg10
1057	8.91154e-47	0.722016	0.769	0.45	1.78231e-43	Extra-embryonic mesoderm	Pmp22
1058	2.44808e-45	0.68682	0.849	0.566	4.89617e-42	Extra-embryonic mesoderm	Fgf3
1059	1.5513e-44	0.616647	0.978	0.765	3.10259e-41	Extra-embryonic mesoderm	Id3
1060	1.90298e-41	1.29668	0.737	0.491	3.80595e-38	Extra-embryonic mesoderm	Etv2
1061	2.41781e-41	0.535968	1	0.872	4.83562e-38	Extra-embryonic mesoderm	S100a10
1062	3.72944e-41	0.89007	0.989	0.863	7.45889e-38	Extra-embryonic mesoderm	Phlda2
1063	1.88449e-39	0.538678	1	0.968	3.76898e-36	Extra-embryonic mesoderm	Gm10263
1064	4.58055e-38	0.511857	0.774	0.448	9.1611e-35	Extra-embryonic mesoderm	Polg
1065	3.6268e-37	0.77707	0.898	0.745	7.2536e-34	Extra-embryonic mesoderm	H19
1066	2.50269e-33	0.606258	0.871	0.66	5.00538e-30	Extra-embryonic mesoderm	Tmem88
1067	3.06923e-33	0.360231	1	0.997	6.13847e-30	Extra-embryonic mesoderm	Gm10288
1068	1.45143e-31	0.511533	0.989	0.843	2.90286e-28	Extra-embryonic mesoderm	Fn1
1069	1.85657e-31	0.674368	0.651	0.422	3.71314e-28	Extra-embryonic mesoderm	Bmp4
1070	2.04231e-31	0.936621	0.866	0.68	4.08462e-28	Extra-embryonic mesoderm	Rps25
1071	2.83225e-31	0.896038	0.806	0.594	5.6645e-28	Extra-embryonic mesoderm	Gm6988
1072	3.65029e-31	0.499137	1	0.993	7.30059e-28	Extra-embryonic mesoderm	Rps24
1073	6.24643e-31	0.729814	0.812	0.581	1.24929e-27	Extra-embryonic mesoderm	Rps25-ps1
1074	1.80944e-30	0.522374	0.973	0.854	3.61889e-27	Extra-embryonic mesoderm	Rps27rt
1075	1.43154e-29	0.815162	0.774	0.583	2.86307e-26	Extra-embryonic mesoderm	Gm2225
1076	3.36747e-29	0.45823	0.968	0.909	6.73494e-26	Extra-embryonic mesoderm	Cox7a2
1077	1.31747e-28	0.397177	1	0.969	2.63493e-25	Extra-embryonic mesoderm	Rps13-ps2
1078	1.43965e-28	0.487058	0.962	0.921	2.8793e-25	Extra-embryonic mesoderm	Gm8292
1079	2.92346e-27	0.53278	0.828	0.623	5.84691e-24	Extra-embryonic mesoderm	Ccnd2
1080	3.47366e-27	0.458875	0.839	0.635	6.94732e-24	Extra-embryonic mesoderm	Gtpbp4
1081	3.73243e-27	1.06277	0.694	0.519	7.46486e-24	Extra-embryonic mesoderm	Hand1
1082	9.60973e-27	0.623581	0.763	0.611	1.92195e-23	Extra-embryonic mesoderm	Podxl
1083	9.71174e-27	0.550515	0.677	0.425	1.94235e-23	Extra-embryonic mesoderm	Msx1
1084	1.69317e-25	0.618518	0.468	0.245	3.38633e-22	Extra-embryonic mesoderm	Lmo2
1085	4.53208e-25	0.619645	0.758	0.6	9.06417e-22	Extra-embryonic mesoderm	Rps15a
1086	5.49545e-25	0.419991	0.903	0.707	1.09909e-21	Extra-embryonic mesoderm	Cited2
1087	9.53194e-25	0.448437	0.505	0.259	1.90639e-21	Extra-embryonic mesoderm	Stard8
1088	9.60497e-25	0.456816	0.952	0.835	1.92099e-21	Extra-embryonic mesoderm	Peg3
1089	1.62863e-24	0.432601	0.935	0.807	3.25726e-21	Extra-embryonic mesoderm	NMPsa2
1090	5.07831e-24	0.78033	0.559	0.362	1.01566e-20	Extra-embryonic mesoderm	Gadd45g
1091	6.21259e-23	0.551114	0.505	0.305	1.24252e-19	Extra-embryonic mesoderm	Nrp2
1092	1.07681e-22	0.395401	0.817	0.617	2.15361e-19	Extra-embryonic mesoderm	Myc
1093	1.59361e-22	0.474818	0.892	0.771	3.18722e-19	Extra-embryonic mesoderm	Gm9320
1094	1.68571e-22	0.435665	0.704	0.494	3.37141e-19	Extra-embryonic mesoderm	Gata4
1095	8.17963e-22	0.49169	0.796	0.66	1.63593e-18	Extra-embryonic mesoderm	Sec61g
1096	1.90548e-21	0.319699	1	0.974	3.81096e-18	Extra-embryonic mesoderm	Rps27a-ps3
1097	8.7429e-20	0.415505	0.989	0.942	1.74858e-16	Extra-embryonic mesoderm	Rps27
1098	5.06409e-19	0.477661	0.796	0.706	1.01282e-15	Extra-embryonic mesoderm	Gpc3
1099	1.24623e-18	0.386852	0.93	0.865	2.49245e-15	Extra-embryonic mesoderm	Apoe
1100	1.40361e-18	0.649927	0.591	0.459	2.80723e-15	Extra-embryonic mesoderm	Msx2
1101	2.23194e-18	0.336736	0.855	0.759	4.46389e-15	Extra-embryonic mesoderm	Eif4e
1102	4.27421e-18	0.41818	0.753	0.645	8.54842e-15	Extra-embryonic mesoderm	Sf3b6
1103	2.7364e-17	0.265895	1	0.999	5.4728e-14	Extra-embryonic mesoderm	Hspa8
1104	1.00836e-16	0.395711	0.516	0.358	2.01671e-13	Extra-embryonic mesoderm	Rspo3
1105	1.11566e-16	0.605881	0.866	0.739	2.23132e-13	Extra-embryonic mesoderm	Npm1
1106	1.25219e-16	0.432949	0.565	0.44	2.50437e-13	Extra-embryonic mesoderm	Prdm6
1107	1.9178e-16	0.37801	0.753	0.657	3.83561e-13	Extra-embryonic mesoderm	Cops2
1108	2.42929e-16	0.547073	0.968	0.902	4.85859e-13	Extra-embryonic mesoderm	Tcf7l1
1109	2.53076e-16	0.303106	0.478	0.322	5.06152e-13	Extra-embryonic mesoderm	Tgfb1
1110	3.47693e-16	0.323487	0.812	0.738	6.95386e-13	Extra-embryonic mesoderm	Gm2830
1111	6.23024e-16	0.352561	0.763	0.654	1.24605e-12	Extra-embryonic mesoderm	Snrpb2
1112	7.73319e-16	0.378041	0.876	0.78	1.54664e-12	Extra-embryonic mesoderm	Car4
1113	1.05225e-15	0.298782	0.452	0.302	2.10449e-12	Extra-embryonic mesoderm	Zc3hav1
1114	1.77508e-15	0.585144	0.435	0.27	3.55016e-12	Extra-embryonic mesoderm	Tal1
1115	2.41144e-15	0.446616	0.532	0.419	4.82288e-12	Extra-embryonic mesoderm	Mest
1116	2.78874e-15	0.605787	0.597	0.507	5.57747e-12	Extra-embryonic mesoderm	Spin2c
1117	4.75972e-15	0.493054	0.522	0.403	9.51943e-12	Extra-embryonic mesoderm	Phlda1
1118	6.80609e-15	0.578382	0.484	0.351	1.36122e-11	Extra-embryonic mesoderm	Gata2
1119	7.88648e-15	0.372353	0.935	0.827	1.5773e-11	Extra-embryonic mesoderm	Actn1
1120	1.20019e-14	0.291411	0.935	0.858	2.40038e-11	Extra-embryonic mesoderm	Slc16a3
1121	2.42991e-14	0.639642	0.737	0.655	4.85982e-11	Extra-embryonic mesoderm	Rps4x
1122	2.73739e-14	0.334542	0.909	0.827	5.47479e-11	Extra-embryonic mesoderm	Hsph1
1123	2.91564e-14	0.340151	0.704	0.593	5.83129e-11	Extra-embryonic mesoderm	Ubl5
1124	4.04551e-14	0.395098	0.511	0.4	8.09103e-11	Extra-embryonic mesoderm	Frmd6
1125	1.66091e-13	0.343289	0.565	0.441	3.32183e-10	Extra-embryonic mesoderm	Ckb
1126	6.67445e-13	0.318387	0.586	0.462	1.33489e-09	Extra-embryonic mesoderm	Zfpm1
1127	1.18051e-12	0.342163	0.645	0.52	2.36102e-09	Extra-embryonic mesoderm	Cdh11
1128	1.81454e-12	0.286004	0.731	0.646	3.62908e-09	Extra-embryonic mesoderm	Dusp9
1129	4.46912e-12	0.372308	0.694	0.64	8.93825e-09	Extra-embryonic mesoderm	Ptch1
1130	4.51419e-12	0.32625	0.785	0.686	9.02838e-09	Extra-embryonic mesoderm	Flnb
1131	7.00842e-12	0.271629	0.817	0.729	1.40168e-08	Extra-embryonic mesoderm	Pop5
1132	1.71994e-11	0.293595	0.72	0.664	3.43989e-08	Extra-embryonic mesoderm	Krt8
1133	2.57086e-11	0.300257	0.296	0.224	5.14173e-08	Extra-embryonic mesoderm	Exoc3l
1134	6.83482e-11	0.271268	0.618	0.526	1.36696e-07	Extra-embryonic mesoderm	Col4a1
1135	8.94869e-11	0.394367	0.462	0.39	1.78974e-07	Extra-embryonic mesoderm	Vstm2b
1136	1.75804e-09	0.3286	0.608	0.551	3.51608e-06	Extra-embryonic mesoderm	F2r
1137	3.2803e-09	0.320231	0.505	0.438	6.56059e-06	Extra-embryonic mesoderm	Pard6b
1138	3.75949e-09	0.443208	0.505	0.462	7.51898e-06	Extra-embryonic mesoderm	Bmp2
1139	5.73416e-09	0.352984	0.586	0.555	1.14683e-05	Extra-embryonic mesoderm	Klf6
1140	9.19772e-09	0.304196	0.366	0.311	1.83954e-05	Extra-embryonic mesoderm	Has2
1141	1.39084e-08	0.264132	0.452	0.392	2.78167e-05	Extra-embryonic mesoderm	Morc4
1142	1.30661e-07	0.633907	0.538	0.534	0.000261323	Extra-embryonic mesoderm	Cecr2
1143	2.60218e-07	0.451092	0.586	0.568	0.000520436	Extra-embryonic mesoderm	Gm9616
1144	4.91608e-07	0.301807	0.747	0.698	0.000983216	Extra-embryonic mesoderm	H1f4
1145	1.18845e-06	0.437372	0.441	0.397	0.0023769	Extra-embryonic mesoderm	Foxf1
1146	1.82507e-05	0.403013	0.511	0.511	0.0365014	Extra-embryonic mesoderm	Gm14681
1147	1.90983e-05	0.382697	0.57	0.608	0.0381966	Extra-embryonic mesoderm	Tmsb4x
1148	5.29962e-05	0.30585	0.301	0.293	0.105992	Extra-embryonic mesoderm	Runx1
1149	0.000709537	0.364111	0.505	0.549	1	Extra-embryonic mesoderm	Egfl7
1150	0.00269306	0.56004	0.516	0.559	1	Extra-embryonic mesoderm	Med16
1151	8.56878e-63	0.859542	0.5	0.026	1.71376e-59	Node/notochord	Rsph4a
1152	9.61118e-49	1.51425	0.768	0.14	1.92224e-45	Node/notochord	1110017D15Rik
1153	1.51351e-39	2.10617	0.911	0.329	3.02701e-36	Node/notochord	Foxj1
1154	1.12149e-38	0.669153	0.375	0.024	2.24298e-35	Node/notochord	Spef2
1155	1.41856e-36	1.07154	0.607	0.115	2.83713e-33	Node/notochord	Noto
1156	2.75305e-30	1.72585	0.804	0.234	5.50611e-27	Node/notochord	Cfap126
1157	2.11701e-29	0.808501	0.429	0.064	4.23401e-26	Node/notochord	Cfap45
1158	9.46935e-29	0.632957	0.321	0.025	1.89387e-25	Node/notochord	Lrrc23
1159	3.96331e-25	1.79883	0.946	0.623	7.92662e-22	Node/notochord	T-Bra
1160	5.12372e-25	1.27991	0.804	0.389	1.02474e-21	Node/notochord	Chrd
1161	7.06009e-25	0.95076	1	0.955	1.41202e-21	Node/notochord	Emb
1162	8.46123e-24	1.36898	0.696	0.247	1.69225e-20	Node/notochord	Pifo
1163	5.2625e-23	0.644162	0.375	0.052	1.0525e-19	Node/notochord	Efcab1
1164	3.63446e-22	0.605031	0.286	0.01	7.26891e-19	Node/notochord	Cfap161
1165	7.66714e-22	2.02562	0.661	0.19	1.53343e-18	Node/notochord	Tppp3
1166	1.78232e-21	0.924434	0.714	0.281	3.56464e-18	Node/notochord	Lrrc56
1167	3.87471e-20	1.09612	0.768	0.421	7.74941e-17	Node/notochord	Ccpg1os
1168	1.98795e-19	0.925413	0.964	0.774	3.9759e-16	Node/notochord	Tagln2
1169	2.15355e-19	1.32248	0.732	0.352	4.30709e-16	Node/notochord	Mlf1
1170	6.99996e-19	1.20408	0.661	0.245	1.39999e-15	Node/notochord	1700007K13Rik
1171	3.0107e-18	0.938929	0.571	0.182	6.0214e-15	Node/notochord	2410004P03Rik
1172	3.39989e-18	1.02685	0.679	0.319	6.79978e-15	Node/notochord	Cfap69
1173	6.28735e-18	0.818547	0.679	0.325	1.25747e-14	Node/notochord	Samd3
1174	1.11975e-17	1.21989	0.554	0.152	2.2395e-14	Node/notochord	Ccno
1175	1.75914e-17	0.904688	0.679	0.305	3.51827e-14	Node/notochord	Dgkk
1176	1.9176e-17	0.925557	0.964	0.899	3.8352e-14	Node/notochord	Larp7
1177	4.33168e-17	1.05887	0.75	0.449	8.66336e-14	Node/notochord	Calca
1178	5.86697e-17	1.02502	0.536	0.181	1.17339e-13	Node/notochord	1700016K19Rik
1179	1.2229e-16	1.07159	0.839	0.576	2.4458e-13	Node/notochord	Ppp1r1a
1180	1.75994e-16	1.05874	0.732	0.424	3.51988e-13	Node/notochord	Ndrg1
1181	3.24673e-16	0.889511	0.482	0.136	6.49346e-13	Node/notochord	Cfap52
1182	5.11604e-16	1.08891	0.643	0.31	1.02321e-12	Node/notochord	Iqcg
1183	5.67038e-16	1.0148	0.893	0.663	1.13408e-12	Node/notochord	Krt8
1184	1.98372e-15	0.91459	0.464	0.141	3.96745e-12	Node/notochord	Riiad1
1185	5.36605e-15	0.791282	0.536	0.19	1.07321e-11	Node/notochord	Odad3
1186	5.6866e-15	0.527925	0.321	0.043	1.13732e-11	Node/notochord	Mapk15
1187	5.73363e-14	1.06741	0.911	0.724	1.14673e-10	Node/notochord	Ifitm1
1188	1.34082e-13	0.936726	0.732	0.485	2.68163e-10	Node/notochord	Foxa2
1189	1.76197e-13	0.706734	0.804	0.542	3.52393e-10	Node/notochord	Cldn6
1190	4.5652e-13	0.867835	0.482	0.172	9.1304e-10	Node/notochord	Nme5
1191	6.77801e-13	0.533794	0.268	0.044	1.3556e-09	Node/notochord	Lrrc18
1192	7.54562e-12	0.709394	0.857	0.619	1.50912e-08	Node/notochord	Sp5
1193	9.98011e-12	1.0617	0.875	0.715	1.99602e-08	Node/notochord	Cited2
1194	2.02949e-11	0.953609	0.554	0.29	4.05897e-08	Node/notochord	Capsl
1195	2.96286e-11	0.693547	0.571	0.313	5.92573e-08	Node/notochord	Smoc1
1196	6.79484e-11	0.767871	0.768	0.6	1.35897e-07	Node/notochord	Crip2
1197	3.50837e-10	0.828537	0.625	0.411	7.01673e-07	Node/notochord	Epha2
1198	3.7731e-10	0.791962	0.571	0.336	7.5462e-07	Node/notochord	Arl4a
1199	4.95549e-10	0.911266	0.839	0.784	9.91098e-07	Node/notochord	Car4
1200	8.53044e-10	0.663349	0.839	0.677	1.70609e-06	Node/notochord	Cdh1
1201	2.06186e-09	0.689557	0.446	0.212	4.12373e-06	Node/notochord	Odad4
1202	2.16419e-09	0.469716	1	0.97	4.32838e-06	Node/notochord	Gm10263
1203	3.21884e-09	0.584954	0.982	0.974	6.43768e-06	Node/notochord	Malat1
1204	4.48287e-09	0.636898	0.393	0.164	8.96574e-06	Node/notochord	Adamts15
1205	3.89898e-08	0.784792	0.411	0.192	7.79797e-05	Node/notochord	Zmynd10
1206	5.38269e-08	0.682455	0.786	0.642	0.000107654	Node/notochord	Rbp1
1207	6.29795e-08	0.609309	0.982	0.946	0.000125959	Node/notochord	Tuba1a
1208	1.56501e-07	0.879888	0.464	0.277	0.000313001	Node/notochord	Bicc1
1209	3.7834e-07	0.503904	0.911	0.923	0.00075668	Node/notochord	Gm8292
1210	8.51073e-07	0.52475	0.411	0.225	0.00170215	Node/notochord	Krt7
1211	1.84787e-06	0.695175	0.839	0.924	0.00369575	Node/notochord	Rps24-ps3
1212	2.40078e-06	0.778292	0.393	0.249	0.00480157	Node/notochord	Ccdc189
1213	2.76715e-06	0.422022	0.982	0.97	0.00553431	Node/notochord	Ubb
1214	6.81443e-06	0.665899	0.321	0.163	0.0136289	Node/notochord	Efhc1
1215	8.43314e-06	0.599013	0.75	0.791	0.0168663	Node/notochord	Slc16a1
1216	1.19912e-05	0.466976	0.554	0.429	0.0239824	Node/notochord	Fgf5
1217	1.68199e-05	0.82934	0.286	0.146	0.0336398	Node/notochord	Nog
1218	1.83757e-05	0.532118	0.804	0.712	0.0367515	Node/notochord	Krt18
1219	2.26485e-05	0.412155	0.518	0.42	0.0452969	Node/notochord	Grb7
1220	5.33473e-05	0.473593	0.643	0.522	0.106695	Node/notochord	Rtl8b
1221	7.95773e-05	0.427797	0.536	0.472	0.159155	Node/notochord	Bmp7
1222	0.000109108	0.695507	0.607	0.606	0.218215	Node/notochord	Tmsb4x
1223	0.000139445	1.00521	0.446	0.372	0.278891	Node/notochord	Rsph1
1224	0.000165338	0.321096	0.679	0.637	0.330676	Node/notochord	F11r
1225	0.000181633	1.19838	0.286	0.188	0.363267	Node/notochord	Drc3
1226	0.000227688	0.335202	0.875	0.846	0.455376	Node/notochord	Cd24a
1227	0.000261834	0.380038	0.464	0.404	0.523669	Node/notochord	Plxna2
1228	0.000280228	0.634833	0.607	0.593	0.560456	Node/notochord	Rps25-ps1
1229	0.000315745	0.299424	0.964	0.962	0.63149	Node/notochord	Hspa5
1230	0.000390426	0.291787	0.875	0.913	0.780853	Node/notochord	Cox7a2
1231	0.000444816	0.478612	0.589	0.599	0.889631	Node/notochord	Ubl5
1232	0.000452562	0.406632	0.304	0.192	0.905124	Node/notochord	Kif27
1233	0.000500328	1.00218	0.643	0.66	1	Node/notochord	Rps4x
1234	0.000782686	0.553017	0.429	0.384	1	Node/notochord	Gm1673
1235	0.000796239	0.300746	0.964	0.994	1	Node/notochord	Rps24
1236	0.000843963	0.381026	0.804	0.946	1	Node/notochord	Rps27
1237	0.000891834	0.619925	0.625	0.605	1	Node/notochord	Gm6988
1238	0.00135261	0.701777	0.661	0.69	1	Node/notochord	Rps25
1239	0.00162274	0.513858	0.625	0.668	1	Node/notochord	Sec61g
1240	0.00218193	0.318545	0.625	0.621	1	Node/notochord	Oaz2
1241	0.00223786	0.431899	1	0.975	1	Node/notochord	H2az2
1242	0.00242058	0.553219	0.589	0.593	1	Node/notochord	Gm2225
1243	0.0028769	0.317546	0.357	0.336	1	Node/notochord	Trp53i11
1244	0.00298514	0.408072	0.75	0.862	1	Node/notochord	Rps27rt
1245	0.00304389	0.337262	0.464	0.433	1	Node/notochord	Nkd1
1246	0.00359406	0.450244	0.482	0.491	1	Node/notochord	Gstm5
1247	0.00363403	0.384675	0.661	0.627	1	Node/notochord	Lhx1
1248	0.00608089	0.661276	0.268	0.224	1	Node/notochord	Lrrc46
1249	0.00619784	0.52153	0.571	0.609	1	Node/notochord	Rps15a
1250	0.00783463	0.788019	0.536	0.569	1	Node/notochord	Gm9616
1251	1.11293e-66	1.4941	0.976	0.314	2.22587e-63	Extra-embryonic ectoderm	Gjb3
1252	2.70914e-62	1.0613	0.953	0.369	5.41828e-59	Extra-embryonic ectoderm	Fabp3
1253	3.56731e-60	1.23404	0.976	0.337	7.13462e-57	Extra-embryonic ectoderm	Ddah1
1254	6.0415e-58	1.54716	0.965	0.381	1.2083e-54	Extra-embryonic ectoderm	Morc4
1255	2.6378e-57	0.827671	0.812	0.187	5.27559e-54	Extra-embryonic ectoderm	Cldn3
1256	3.33692e-57	2.24318	0.988	0.511	6.67384e-54	Extra-embryonic ectoderm	Id2
1257	3.28484e-56	1.49221	0.976	0.297	6.56969e-53	Extra-embryonic ectoderm	Trap1a
1258	5.29412e-56	1.25817	0.929	0.367	1.05882e-52	Extra-embryonic ectoderm	Tex19.1
1259	3.88372e-55	1.78567	1	0.538	7.76745e-52	Extra-embryonic ectoderm	Mt1
1260	7.24034e-55	0.521843	0.671	0.14	1.44807e-51	Extra-embryonic ectoderm	Cldn4
1261	1.41766e-54	0.812934	0.859	0.297	2.83531e-51	Extra-embryonic ectoderm	Dppa4
1262	2.24624e-54	1.07167	0.918	0.31	4.49248e-51	Extra-embryonic ectoderm	Htra1
1263	4.15952e-54	1.10726	0.965	0.233	8.31904e-51	Extra-embryonic ectoderm	S100a6
1264	1.18054e-53	1.07684	1	0.99	2.36108e-50	Extra-embryonic ectoderm	Bex3
1265	4.03075e-53	1.37783	0.953	0.371	8.0615e-50	Extra-embryonic ectoderm	Gm1673
1266	7.38707e-53	1.94497	1	0.617	1.47741e-49	Extra-embryonic ectoderm	Mt2
1267	4.31171e-52	0.706032	0.718	0.175	8.62342e-49	Extra-embryonic ectoderm	Tinagl1
1268	1.64146e-51	1.08808	0.941	0.376	3.28293e-48	Extra-embryonic ectoderm	Klhl22
1269	1.88764e-51	1.21598	1	0.915	3.77528e-48	Extra-embryonic ectoderm	Bex1
1270	1.05644e-50	1.0667	0.753	0.21	2.11287e-47	Extra-embryonic ectoderm	Esrrb
1271	1.08485e-49	1.78648	1	0.747	2.1697e-46	Extra-embryonic ectoderm	H19
1272	2.19003e-49	1.1269	1	0.588	4.38006e-46	Extra-embryonic ectoderm	Fbxo21
1273	1.04946e-47	1.10775	1	0.672	2.09892e-44	Extra-embryonic ectoderm	Cd63
1274	4.03762e-47	0.898594	0.859	0.319	8.07524e-44	Extra-embryonic ectoderm	Tfap2c
1275	3.97913e-46	0.948254	0.988	0.492	7.95825e-43	Extra-embryonic ectoderm	Cd63-ps
1276	2.29731e-45	1.01688	0.894	0.442	4.59461e-42	Extra-embryonic ectoderm	Apoc1
1277	3.24293e-45	1.20923	0.976	0.461	6.48586e-42	Extra-embryonic ectoderm	Peg10
1278	4.31912e-45	0.974201	0.965	0.437	8.63824e-42	Extra-embryonic ectoderm	Rbm38
1279	1.5009e-43	0.863489	0.765	0.19	3.00181e-40	Extra-embryonic ectoderm	Gjb5
1280	2.82619e-43	0.645181	0.776	0.124	5.65239e-40	Extra-embryonic ectoderm	Wnt6
1281	1.3646e-42	0.604636	0.694	0.161	2.72919e-39	Extra-embryonic ectoderm	Folr1
1282	1.7572e-41	0.93561	0.906	0.342	3.51441e-38	Extra-embryonic ectoderm	Perp
1283	1.91518e-41	0.967175	0.776	0.239	3.83036e-38	Extra-embryonic ectoderm	Nat8l
1284	7.6125e-41	0.91468	0.953	0.452	1.5225e-37	Extra-embryonic ectoderm	Cotl1
1285	1.0598e-40	1.12516	0.976	0.708	2.1196e-37	Extra-embryonic ectoderm	Gsto1
1286	2.3742e-40	1.01341	0.847	0.344	4.7484e-37	Extra-embryonic ectoderm	Sfn
1287	1.41703e-39	0.864733	0.941	0.518	2.83407e-36	Extra-embryonic ectoderm	Cd9
1288	4.35398e-39	1.19252	0.976	0.786	8.70795e-36	Extra-embryonic ectoderm	Mrps10
1289	7.91469e-39	0.752664	1	0.983	1.58294e-35	Extra-embryonic ectoderm	Tceal9
1290	8.58626e-39	0.963177	0.976	0.635	1.71725e-35	Extra-embryonic ectoderm	Ezr
1291	1.16323e-38	0.777801	0.8	0.241	2.32647e-35	Extra-embryonic ectoderm	Sord
1292	1.3301e-38	0.745378	1	0.919	2.6602e-35	Extra-embryonic ectoderm	Tuba1c
1293	2.45527e-37	0.898919	0.941	0.536	4.91055e-34	Extra-embryonic ectoderm	Cldn6
1294	8.99218e-37	0.728523	0.729	0.179	1.79844e-33	Extra-embryonic ectoderm	Fgfbp1
1295	3.09554e-35	0.882699	0.8	0.3	6.19109e-32	Extra-embryonic ectoderm	Pou3f1
1296	2.6272e-34	0.66528	0.8	0.257	5.2544e-31	Extra-embryonic ectoderm	Ak1
1297	7.64297e-34	0.646	0.753	0.323	1.52859e-30	Extra-embryonic ectoderm	Xlr3a
1298	5.31485e-33	0.774161	0.8	0.251	1.06297e-29	Extra-embryonic ectoderm	Cited1
1299	7.49046e-33	0.519011	0.6	0.186	1.49809e-29	Extra-embryonic ectoderm	Gm32885
1300	2.29675e-32	0.757545	0.953	0.522	4.59349e-29	Extra-embryonic ectoderm	Anxa5
1301	4.64741e-31	0.714379	0.988	0.772	9.29482e-28	Extra-embryonic ectoderm	Tagln2
1302	8.22602e-31	0.735333	0.8	0.34	1.6452e-27	Extra-embryonic ectoderm	Cpne3
1303	1.01342e-30	0.727872	0.788	0.405	2.02683e-27	Extra-embryonic ectoderm	Lad1
1304	3.76161e-30	0.817902	0.788	0.319	7.52322e-27	Extra-embryonic ectoderm	Hspb1
1305	1.14531e-29	0.768557	0.953	0.586	2.29062e-26	Extra-embryonic ectoderm	Upp1
1306	1.48052e-29	0.844612	1	0.511	2.96104e-26	Extra-embryonic ectoderm	Utf1
1307	1.95464e-28	0.651878	0.706	0.318	3.90927e-25	Extra-embryonic ectoderm	Nup62cl
1308	2.80999e-28	0.489367	0.553	0.159	5.61999e-25	Extra-embryonic ectoderm	Sfmbt2
1309	1.39895e-26	0.608449	0.718	0.288	2.79791e-23	Extra-embryonic ectoderm	Krt19
1310	1.55237e-26	0.580117	0.729	0.379	3.10475e-23	Extra-embryonic ectoderm	2200002D01Rik
1311	1.83339e-26	0.543011	0.753	0.275	3.66678e-23	Extra-embryonic ectoderm	Klf5
1312	2.52586e-26	0.621947	0.824	0.407	5.05172e-23	Extra-embryonic ectoderm	Baz1a
1313	4.65187e-26	0.682331	0.776	0.362	9.30374e-23	Extra-embryonic ectoderm	Ass1
1314	1.97307e-25	0.661141	0.953	0.673	3.94614e-22	Extra-embryonic ectoderm	Cdh1
1315	2.13089e-24	0.635467	0.788	0.433	4.26179e-21	Extra-embryonic ectoderm	Irx3
1316	2.46231e-24	0.655205	0.906	0.699	4.92462e-21	Extra-embryonic ectoderm	Lmo4
1317	4.15023e-24	0.572974	0.894	0.538	8.30047e-21	Extra-embryonic ectoderm	Pdlim1
1318	2.05829e-23	0.511983	0.694	0.338	4.11659e-20	Extra-embryonic ectoderm	Gab1
1319	2.53686e-22	0.541416	0.988	0.859	5.07371e-19	Extra-embryonic ectoderm	Slc16a3
1320	2.89173e-22	0.520866	0.741	0.351	5.78346e-19	Extra-embryonic ectoderm	Slc29a1
1321	4.89944e-22	0.605143	0.882	0.645	9.79888e-19	Extra-embryonic ectoderm	Dusp9
1322	9.123e-22	0.492374	0.624	0.275	1.8246e-18	Extra-embryonic ectoderm	Inpp1
1323	1.60247e-21	0.556772	0.776	0.406	3.20494e-18	Extra-embryonic ectoderm	Efna3
1324	2.60238e-21	0.642666	0.988	0.781	5.20476e-18	Extra-embryonic ectoderm	Slc2a3
1325	3.47426e-21	0.705539	0.859	0.632	6.94852e-18	Extra-embryonic ectoderm	F11r
1326	5.46302e-21	0.496537	0.965	0.707	1.0926e-17	Extra-embryonic ectoderm	Krt18
1327	8.66971e-21	0.474468	0.976	0.968	1.73394e-17	Extra-embryonic ectoderm	Ubc
1328	2.92444e-20	0.552705	0.6	0.278	5.84887e-17	Extra-embryonic ectoderm	Rnf128
1329	1.18539e-19	0.677226	0.753	0.452	2.37077e-16	Extra-embryonic ectoderm	Gm45760
1330	1.64505e-19	0.667385	0.965	0.828	3.29009e-16	Extra-embryonic ectoderm	Hsph1
1331	2.63583e-18	0.471429	0.753	0.406	5.27166e-15	Extra-embryonic ectoderm	Anxa2
1332	8.04577e-18	0.582035	0.694	0.427	1.60915e-14	Extra-embryonic ectoderm	Bmp4
1333	1.02202e-17	0.70712	0.624	0.358	2.04403e-14	Extra-embryonic ectoderm	Klhl13
1334	1.05094e-17	0.568171	0.729	0.462	2.10188e-14	Extra-embryonic ectoderm	Zfpm1
1335	1.22352e-17	0.472231	0.835	0.482	2.44704e-14	Extra-embryonic ectoderm	L1td1
1336	4.73364e-17	0.492943	1	0.969	9.46727e-14	Extra-embryonic ectoderm	Gm10263
1337	5.63468e-17	0.491926	0.8	0.545	1.12694e-13	Extra-embryonic ectoderm	Hdac6
1338	1.37951e-15	0.55485	0.659	0.384	2.75902e-12	Extra-embryonic ectoderm	Plec
1339	1.70578e-15	0.518791	0.918	0.721	3.41155e-12	Extra-embryonic ectoderm	Mkrn1
1340	9.16915e-15	0.441507	0.894	0.622	1.83383e-11	Extra-embryonic ectoderm	Pmm1
1341	8.55303e-13	0.461873	0.847	0.636	1.71061e-09	Extra-embryonic ectoderm	Lgals1
1342	6.54911e-12	0.464829	0.729	0.505	1.30982e-08	Extra-embryonic ectoderm	Septin11
1343	5.23286e-11	0.444729	0.6	0.397	1.04657e-07	Extra-embryonic ectoderm	Smad7
1344	1.68071e-10	0.448789	0.671	0.466	3.36142e-07	Extra-embryonic ectoderm	Ccn1
1345	3.40173e-08	0.641076	0.824	0.736	6.80345e-05	Extra-embryonic ectoderm	Gm9701
1346	3.95904e-06	0.623657	0.929	0.922	0.00791809	Extra-embryonic ectoderm	Rps24-ps3
1347	1.19985e-05	0.551007	0.647	0.592	0.023997	Extra-embryonic ectoderm	Gm2225
1348	9.69697e-05	0.546414	0.612	0.592	0.193939	Extra-embryonic ectoderm	Rps25-ps1
1349	0.000124993	0.593527	0.741	0.688	0.249986	Extra-embryonic ectoderm	Rps25
1350	0.000194179	0.599434	0.612	0.605	0.388359	Extra-embryonic ectoderm	Gm6988
