# Supplementary material for: Differential ERK activity shapes the epiblast methylome influencing cell-context response to germ-layer differentiation signals.
Source: Research Square preprint supplement (doi:10.21203/rs.3.rs-3092600/v1), 2023-06-26
Supplement: Supplementary file 10 [file Supplementary Data 4.xlsx]

## Sheet: DAPs_CLDN6sortedEpiSC_FDR_0.05
PeakID (cmd=annotatePeaks.pl HOMER/EpiSC_FDR_0.05.peaks mm10 -annStats HOMER/EpiSC_FDR_0.05.annotated.annStats)	Chr	Start	End	Annotation	Detailed Annotation	Distance to TSS	Nearest PromoterID	Entrez ID	Nearest Unigene	Nearest Refseq	Nearest Ensembl	Gene Name	Gene Alias	Gene Description	Gene Type
29104	chrX	18758078	18758578	Intergenic	RMER17B|LTR|ERVK	-297054	NM_175228	75905	Mm.159617	NM_175228	ENSMUSG00000037358	4930578C19Rik	-	RIKEN cDNA 4930578C19 gene	protein-coding
17021	chr3	48124203	48124703	Intergenic	RLTR9D2|LTR|ERVK	-97694	NR_040408	666202	Mm.465057	NR_040408		Gm7977	EG666202	tyrosine 3-monooxygenase/tryptophan 5-monooxygenase activation protein, theta polypeptide pseudogene	pseudo
24957	chr7	99102210	99102710	intron (NM_178635, intron 3 of 14)	RMER17C|LTR|ERVK	38684	NM_178635	78610	Mm.323072	NM_178635	ENSMUSG00000035354	Uvrag	9530039D02Rik|AI648770|BB124205|Uvrag1|Uvragl	UV radiation resistance associated gene	protein-coding
5599	chr11	118540337	118540837	intron (NM_001285436, intron 3 of 13)	intron (NM_001285436, intron 3 of 13)	63627	NM_172573	217364	Mm.473963	NM_172573	ENSMUSG00000033857	Engase	C130099A03|D230014K01Rik	endo-beta-N-acetylglucosaminidase	protein-coding
1985	chr10	12909844	12910344	Intergenic	RLTR30B_MM|LTR|ERV1	13033	NR_038028	320273	Mm.417706	NR_038027	ENSMUSG00000097378	B230208H11Rik	-	RIKEN cDNA B230208H11 gene	ncRNA
28331	chr9	69860404	69860904	Intergenic	RMER17C|LTR|ERVK	99508	NR_040765	319970	Mm.186434	NR_040765	ENSMUSG00000097623	B230323A14Rik	-	RIKEN cDNA B230323A14 gene	ncRNA
7884	chr13	99016674	99017174	Intergenic	B1_Mus2|SINE|Alu	-32359	NM_027064	69382	Mm.45466	NM_027064	ENSMUSG00000045022	1700024P04Rik	H2bl1|Subh2bv	RIKEN cDNA 1700024P04 gene	protein-coding
22345	chr6	37604074	37604576	Intergenic	RLTR9A|LTR|ERVK	74152	NM_145364	208665	Mm.262635	NM_145364	ENSMUSG00000038641	Akr1d1	-	aldo-keto reductase family 1, member D1	protein-coding
2858	chr10	81534739	81535239	intron (NM_010301, intron 2 of 6)	intron (NM_010301, intron 2 of 6)	10057	NM_010301	14672	Mm.260925	NM_010301	ENSMUSG00000034781	Gna11	Dsk7|E430025L19	guanine nucleotide binding protein, alpha 11	protein-coding
12697	chr18	10866121	10866621	Intergenic	Intergenic	-80819	NR_029781	723959		NR_029781		Mir1a-2	Mir1-2|Mirn1-2|mmu-mir-1-2|mmu-mir-1a-2	microRNA 1a-2	ncRNA
9599	chr15	74652668	74653168	Intergenic	RLTR16B_MM|LTR|ERVK	-16600	NM_001177437	69439	Mm.263708	NM_001177437	ENSMUSG00000022603	Mroh4	1700016M24Rik	maestro heat-like repeat family member 4	protein-coding
9893	chr15	83736303	83736803	Intergenic	Intergenic	-11514	NM_022723	64706	Mm.40393	NM_022723	ENSMUSG00000016763	Scube1	7330410C13Rik|A630023E24Rik	signal peptide, CUB domain, EGF-like 1	protein-coding
10666	chr16	24208092	24208592	Intergenic	Intergenic	-185008	NM_178665	210126	Mm.209385	NM_178665	ENSMUSG00000033306	Lpp	9430020K16Rik|AA959454|AU024130|B130055L10Rik|C79715|D630048H16	LIM domain containing preferred translocation partner in lipoma	protein-coding
26412	chr8	71007862	71008362	intron (NR_045487, intron 2 of 2)	RMER17B|LTR|ERVK	18643	NR_045487	69419	Mm.188688	NR_045487		1700026F02Rik	-	RIKEN cDNA 1700026F02 gene	ncRNA
17146	chr3	60617555	60618055	intron (NM_001253711, intron 6 of 7)	intron (NM_001253711, intron 6 of 7)	116553	NM_001253711	56758	Mm.255723	NM_020007	ENSMUSG00000027763	Mbnl1	Mbnl|mKIAA0428	muscleblind-like 1 (Drosophila)	protein-coding
22603	chr6	61523679	61524179	intron (NM_183310, intron 5 of 10)	RLTR9C|LTR|ERVK	-343119	NR_040287	100504262	Mm.438066	NR_040287		A730020E08Rik	-	RIKEN cDNA A730020E08 gene	ncRNA
10570	chr16	19996859	19997359	Intergenic	ERVB7_3-LTR_MM|LTR|ERVK	-14060	NM_183390	239743	Mm.86699	NM_183390	ENSMUSG00000043008	Klhl6	-	kelch-like 6	protein-coding
8057	chr13	117959014	117959514	intron (NM_010408, intron 6 of 7)	RMER17B|LTR|ERVK	-239253	NR_045508	71100	Mm.414841	NR_045508	ENSMUSG00000079048	4933413L06Rik	-	RIKEN cDNA 4933413L06 gene	ncRNA
25103	chr7	107553267	107553767	intron (NR_035497, intron 1 of 3)	BGLII|LTR|ERVK	-13916	NM_172907	244198	Mm.77425	NM_172907	ENSMUSG00000051041	Olfml1	6720478C22|AV321997|BC047207|MVAL564|ONT2|mONT2	olfactomedin-like 1	protein-coding
1969	chr10	10474858	10475358	Intergenic	RMER17B|LTR|ERVK	-2794	NM_001127353	215772	Mm.246573	NM_172547	ENSMUSG00000050994	Adgb	9130014G24Rik	androglobin	protein-coding
28234	chr9	64951925	64952425	promoter-TSS (NM_144813)	promoter-TSS (NM_144813)	-568	NM_144813	214111	Mm.156124	NM_144813	ENSMUSG00000034452	Slc24a1	-	solute carrier family 24 (sodium/potassium/calcium exchanger), member 1	protein-coding
28302	chr9	67236882	67237382	promoter-TSS (NR_029576)	promoter-TSS (NR_029576)	-406	NR_029576	387185		NR_029576		Mir190a	Mir190|Mirn190|mir-190|mmu-mir-190|mmu-mir-190a	microRNA 190a	ncRNA
25542	chr7	133847142	133847642	intron (NM_025850, intron 1 of 10)	Lx8|LINE|L1	-64607	NM_001286031	101437	Mm.199223	NM_133941	ENSMUSG00000030986	Dhx32	3110079L04Rik|4732469F02Rik|AA408140|Ddx32	DEAH (Asp-Glu-Ala-His) box polypeptide 32	protein-coding
11728	chr17	30688413	30688913	intron (NM_013811, intron 21 of 92)	RMER17B|LTR|ERVK	61727	NM_013811	13417	Mm.426017	NM_013811	ENSMUSG00000033826	Dnah8	ATPase|Dnahc8|Hst6.7b|P1-Loop	dynein, axonemal, heavy chain 8	protein-coding
9040	chr14	108199094	108199594	Intergenic	RLTR9C|LTR|ERVK	714895	NM_199065	76965	Mm.257268	NM_199065	ENSMUSG00000075478	Slitrk1	3200001I04Rik	SLIT and NTRK-like family, member 1	protein-coding
17524	chr3	95250931	95251431	promoter-TSS (NM_134253)	promoter-TSS (NM_134253)	12	NM_134253	171388	Mm.331209	NM_134253	ENSMUSG00000028115	Bnipl	1700128A13Rik|BNIP-S|BNIPL1|BNIPL2|PP73|PP753	BCL2/adenovirus E1B 19kD interacting protein like	protein-coding
21015	chr5	104165087	104165587	Intergenic	RLTR13E|LTR|ERVK	-5375	NM_010080	666279	Mm.319832	NM_010080	ENSMUSG00000053268	Dspp	Dmp2|Dmp3|Dpp|Dsp	dentin sialophosphoprotein	protein-coding
20384	chr5	30173274	30173774	intron (NM_001289799, intron 7 of 15)	RLTR9C|LTR|ERVK	2785	NR_035486	100316709		NR_035486		Mir1960	mmu-mir-1960	microRNA 1960	ncRNA
25961	chr8	17653763	17654263	Intergenic	RLTR28|LTR|ERVL	-118628	NM_053171	94109	Mm.436988	NM_053171	ENSMUSG00000060924	Csmd1	B930082H09|mKIAA1890	CUB and Sushi multiple domains 1	protein-coding
3172	chr10	117809053	117809553	Intergenic	Intergenic	-16598	NM_134010	103468	Mm.12568	NM_134010	ENSMUSG00000052798	Nup107	AW541137|C76801	nucleoporin 107	protein-coding
13862	chr19	25297243	25297743	intron (NM_181404, intron 2 of 13)	RMER20A|LTR|ERVK	60291	NM_181404	107351	Mm.260722	NM_181404	ENSMUSG00000032702	Kank1	A930031B09Rik|AU015049|AW121052|Ankrd15|D330024H06Rik|mKIAA0172	KN motif and ankyrin repeat domains 1	protein-coding
3057	chr10	96186287	96186787	Intergenic	RLTR17|LTR|ERVK	-39670	NR_110448	74881	Mm.410819	NR_110448		4930459C07Rik	-	RIKEN cDNA 4930459C07 gene	ncRNA
26874	chr8	105555228	105555728	intron (NM_013477, intron 1 of 7)	RMER17B|LTR|ERVK	10562	NM_013477	11972	Mm.17708	NM_013477	ENSMUSG00000013160	Atp6v0d1	AI267038|Ac39|Atp6d|P39|VATX|Vma6	ATPase, H+ transporting, lysosomal V0 subunit D1	protein-coding
3828	chr11	43281754	43282254	Intergenic	Intergenic	92457	NR_029558	387164		NR_029558	miRBase:MI0000170	Mir146	Mirn146|miR-146a|mmu-mir-146	microRNA 146	ncRNA
12018	chr17	42670846	42671346	intron (NM_001289499, intron 4 of 9)	RLTR13D6|LTR|ERVK	21188	NM_001289500	78249	Mm.66217	NM_030067	ENSMUSG00000023918	Gpr115	4632435A09Rik|AV239010	G protein-coupled receptor 115	protein-coding
4327	chr11	69858534	69859034	promoter-TSS (NM_031880)	promoter-TSS (NM_031880)	-54	NM_031880	83813	Mm.28874	NM_031880	ENSMUSG00000001583	Tnk1	Kos1|Tnk1a|Tnk1b	tyrosine kinase, non-receptor, 1	protein-coding
8215	chr14	22143903	22144403	intron (NM_028275, intron 2 of 6)	intron (NM_028275, intron 2 of 6)	124441	NM_028275	76633	Mm.489898	NM_028275	ENSMUSG00000063458	1700112E06Rik	2700009F18Rik|Oca7	RIKEN cDNA 1700112E06 gene	protein-coding
19527	chr4	133601788	133602288	5' UTR (NM_018754, exon 1 of 1)	5' UTR (NM_018754, exon 1 of 1)	130	NM_018754	55948	Mm.44482	NM_018754	ENSMUSG00000047281	Sfn	Er|Mme1|Ywhas	stratifin	protein-coding
21147	chr5	112199588	112200088	Intergenic	RLTR16B_MM|LTR|ERVK	-6925	NR_045377	75569	Mm.243721	NR_045377		1700028D13Rik	-	RIKEN cDNA 1700028D13 gene	ncRNA
109	chr1	18223408	18223908	promoter-TSS (NR_002879)	promoter-TSS (NR_002879)	-94	NR_002879	654454	Mm.383637	NR_002879	ENSMUSG00000070977	Defb44-ps	Defb44|Defb49|Defb49-ps|EG574082	defensin beta 44, pseudogene	pseudo
6152	chr12	69879231	69879731	intron (NM_201519, intron 1 of 30)	intron (NM_201519, intron 1 of 30)	-13624	NM_178628	73991	Mm.474462	NM_178628	ENSMUSG00000021066	Atl1	4930435M24Rik|Adfsp|Fsp1|Spg3|Spg3a	atlastin GTPase 1	protein-coding
26144	chr8	35946305	35946805	Intergenic	MLT1D|LTR|ERVL-MaLR	-63598	NR_046181	330737	Mm.381743	NR_046181		5430403N17Rik	5430403N17	RIKEN cDNA 5430403N17 gene	ncRNA
22856	chr6	87226157	87226657	intron (NM_054041, intron 12 of 17)	intron (NM_054041, intron 12 of 17)	109368	NM_054041	69538	Mm.232525	NM_054041	ENSMUSG00000033420	Antxr1	2310008J16Rik|2810405N18Rik|Antrx1|Tem8	anthrax toxin receptor 1	protein-coding
10385	chr16	5118547	5119047	intron (NM_008909, intron 1 of 21)	intron (NM_008909, intron 1 of 21)	13684	NM_008909	19041	Mm.266875	NM_008909	ENSMUSG00000039457	Ppl	AW553870	periplakin	protein-coding
10854	chr16	37938609	37939109	intron (NM_153394, intron 1 of 9)	intron (NM_153394, intron 1 of 9)	22363	NM_153394	239845	Mm.228018	NM_153394	ENSMUSG00000046961	Gpr156	Gababl	G protein-coupled receptor 156	protein-coding
16805	chr3	14389738	14390238	Intergenic	ERVB7_3-LTR_MM|LTR|ERVK	26871	NR_033591	622229	Mm.486084	NR_033591		Gm6300	EG622229	solute carrier family 7 (cationic amino acid transporter, y+ system), member pseudogene	pseudo
2809	chr10	80917193	80917693	intron (NM_010722, intron 1 of 11)	intron (NM_010722, intron 1 of 11)	802	NM_010722	16907	Mm.7362	NM_010722	ENSMUSG00000062075	Lmnb2	-	lamin B2	protein-coding
24110	chr7	28931244	28931744	intron (NM_021895, intron 1 of 20)	intron (NM_021895, intron 1 of 20)	30786	NM_021895	60595	Mm.81144	NM_021895	ENSMUSG00000054808	Actn4	C77391	actinin alpha 4	protein-coding
11587	chr17	26953339	26953839	intron (NM_001281491, intron 5 of 18)	intron (NM_001281491, intron 5 of 18)	-5470	NR_037244	100526534		NR_037244	miRBase:MI0014046	Mir3083	mmu-mir-3083	microRNA 3083	ncRNA
7134	chr13	31579809	31580309	non-coding (NR_029439, exon 2 of 6)	non-coding (NR_029439, exon 2 of 6)	2454	NR_029439	71307	Mm.376184	NR_029439	ENSMUSG00000038408	1700018A04Rik	4930551G20Rik|4933439J11Rik	RIKEN cDNA 1700018A04 gene	ncRNA
3598	chr11	20134624	20135124	Intergenic	RLTR13E|LTR|ERVK	-21923	NM_146243	66713	Mm.259045	NM_146243	ENSMUSG00000020152	Actr2	4921510D23Rik|AA409782|Arp2|D6Ertd746e	ARP2 actin-related protein 2	protein-coding
17869	chr3	126643352	126643852	intron (NM_023813, intron 2 of 17)	intron (NM_023813, intron 2 of 17)	46651	NM_001025439	108058	Mm.255822	NM_023813	ENSMUSG00000053819	Camk2d	2810011D23Rik|8030469K03Rik|CaMK II|[d]-CaMKII	calcium/calmodulin-dependent protein kinase II, delta	protein-coding
15138	chr2	61403100	61403600	Intergenic	MER5A1|DNA|hAT-Charlie	-175236	NM_011529	21353	Mm.244393	NM_011529	ENSMUSG00000064289	Tank	C86182|E430026L09Rik|I-TRAF	TRAF family member-associated Nf-kappa B activator	protein-coding
17151	chr3	62367756	62368256	intron (NM_001081295, intron 3 of 13)	intron (NM_001081295, intron 3 of 13)	29229	NM_001081295	622434	Mm.153974	NM_001081295	ENSMUSG00000036885	Arhgef26	4631416L12Rik|8430436L14Rik|AI303572|AW491953|SGEF	Rho guanine nucleotide exchange factor (GEF) 26	protein-coding
23036	chr6	98842872	98843372	Intergenic	MER5A|DNA|hAT-Charlie	185176	NM_001197322	108655	Mm.234965	NM_053202	ENSMUSG00000030067	Foxp1	3110052D19Rik|4932443N09Rik|AI461938|AW494214	forkhead box P1	protein-coding
222	chr1	36707854	36708354	intron (NM_146107, intron 2 of 10)	intron (NM_146107, intron 2 of 10)	1821	NM_146107	226977	Mm.28521	NM_146107	ENSMUSG00000037351	Actr1b	2310066K23Rik|AA960180|AI851923|Arp1b	ARP1 actin-related protein 1B, centractin beta	protein-coding
2137	chr10	25809515	25810015	intron (NR_045349, intron 1 of 4)	RLTR13E|LTR|ERVK	27672	NR_045349	73803	Mm.258921	NR_045349		4930401C15Rik	-	RIKEN cDNA 4930401C15 gene	ncRNA
26462	chr8	72555730	72556230	Intergenic	RLTR9B|LTR|ERVK	-7670	NM_027485	70625	Mm.235885	NM_027485	ENSMUSG00000045248	Med26	5730493L18Rik|AI414941|AW495270|Crsp7	mediator complex subunit 26	protein-coding
24281	chr7	38030483	38030983	Intergenic	RMER20A|LTR|ERVK	-11181	NM_011274	19777	Mm.387220	NM_011274	ENSMUSG00000030421	Uri1	C80913|NNX3|Rmp	URI1, prefoldin-like chaperone	protein-coding
25513	chr7	132359860	132360360	Intergenic	MLTR14|LTR|ERV1	-42955	NM_029935	77590	Mm.213582	NM_029935	ENSMUSG00000030930	Chst15	4631426J05Rik|BRAG|GalNAcS-6ST|MAd5|mKIAA0598	carbohydrate (N-acetylgalactosamine 4-sulfate 6-O) sulfotransferase 15	protein-coding
10571	chr16	20016187	20016687	Intergenic	RLTR13E|LTR|ERVK	-33388	NM_183390	239743	Mm.86699	NM_183390	ENSMUSG00000043008	Klhl6	-	kelch-like 6	protein-coding
8438	chr14	44501954	44502454	intron (NM_198677, intron 2 of 4)	RLTR13A|LTR|ERVK	2082	NM_198677	385138	Mm.293026	NM_198677	ENSMUSG00000072145	BC061237	-	cDNA sequence BC061237	protein-coding
25475	chr7	130018913	130019413	Intergenic	Intergenic	56998	NR_046077	100043150	Mm.334264	NR_046077		Gm4265	-	predicted gene 4265	ncRNA
9404	chr15	45148830	45149330	Intergenic	RLTR13E|LTR|ERVK	-34146	NM_026200	67498	Mm.300079	NM_026200	ENSMUSG00000022342	Kcnv1	2700023A03Rik|vibe	potassium channel, subfamily V, member 1	protein-coding
26038	chr8	25480171	25480671	Intergenic	Intergenic	-38338	NM_001079909	14182	Mm.265716	NM_010206	ENSMUSG00000031565	Fgfr1	AW208770|Eask|FLG|Fgfr-1|Flt-2|Hspy|MFR|bFGF-R-1|c-fgr	fibroblast growth factor receptor 1	protein-coding
2831	chr10	81286571	81287071	intron (NM_001282095, intron 1 of 20)	intron (NM_001282095, intron 1 of 20)	-1040	NM_001282096	27375	Mm.27984	NM_013769	ENSMUSG00000034917	Tjp3	-	tight junction protein 3	protein-coding
23542	chr6	140263930	140264430	Intergenic	Intergenic	-159919	NM_144920	109135	Mm.247670	NM_144920	ENSMUSG00000030231	Plekha5	2810431N21Rik|AI428202|AK129423|AMH-Cre|Ayu21-9|Gt(pU21)9Imeg|Pepp2|Tg(AMH-cre)1Flor	pleckstrin homology domain containing, family A member 5	protein-coding
3883	chr11	48782930	48783430	Intergenic	RMER17B|LTR|ERVK	-17180	NM_008143	14694	Mm.5305	NM_008143	ENSMUSG00000020372	Gnb2l1	AL033335|GB-like|Gnb2-rs1|Rack1|p205	guanine nucleotide binding protein (G protein), beta polypeptide 2 like 1	protein-coding
9334	chr15	37197874	37198374	Intergenic	Intergenic	-34912	NM_026496	252973	Mm.244612	NM_026496	ENSMUSG00000022286	Grhl2	0610015A08Rik|BOM|Tcfcp2l3	grainyhead-like 2 (Drosophila)	protein-coding
11092	chr16	90291665	90292165	Intergenic	RLTR53B_Mm|LTR|ERVK	-7490	NM_178923	224432	Mm.439811	NM_178923	ENSMUSG00000022983	Scaf4	AA517739|Sfrs15|Sra4|Srsf15	SR-related CTD-associated factor 4	protein-coding
11604	chr17	27378848	27379348	Intergenic	Intergenic	21001	NR_106077	102466228		NR_106077		Mir7218	mmu-mir-7218	microRNA mir-7218	ncRNA
10261	chr15	102016620	102017120	Intergenic	Intergenic	-11346	NM_010664	16668	Mm.22479	NM_010664	ENSMUSG00000023043	Krt18	CK18|K18|Krt1-18	keratin 18	protein-coding
23511	chr6	136407487	136407987	intron (NM_001201390, intron 1 of 1)	RMER10B|LTR|ERVL	7832	NM_001201390	100502936	Mm.21182	NM_001201390		E330021D16Rik	C85549	RIKEN cDNA E330021D16 gene	protein-coding
5932	chr12	31073569	31074069	promoter-TSS (NM_027828)	promoter-TSS (NM_027828)	-149	NM_027828	104943	Mm.248938	NM_027828	ENSMUSG00000036136	Fam110c	9030611O19Rik|AU019489	family with sequence similarity 110, member C	protein-coding
17217	chr3	79576094	79576594	Intergenic	RMER17C|LTR|ERVK	-8665	NM_001162999	329679	Mm.244005	NM_001162999	ENSMUSG00000061175	Fnip2	D630023B12Rik|mKIAA1450	folliculin interacting protein 2	protein-coding
12008	chr17	39919859	39920359	Intergenic	RLTR13D6|LTR|ERVK	-30411	NM_001256051	100126775	Mm.471585	NM_001256051		Esp38	Gm21946	exocrine gland secreted peptide 38	protein-coding
28126	chr9	60285675	60286175	intron (NM_001040426, intron 6 of 17)	RMER17C|LTR|ERVK	-144705	NM_172444	207596	Mm.28791	NM_172444	ENSMUSG00000032289	Thsd4	ADAMTSL-6|ADAMTSL6|AI585901|Adamtsl4|B230114P05Rik	thrombospondin, type I, domain containing 4	protein-coding
4139	chr11	60494291	60494791	intron (NM_001103171, intron 18 of 63)	intron (NM_001103171, intron 18 of 63)	25202	NM_001103171	17910	Mm.89960	NM_010862	ENSMUSG00000042678	Myo15	Myo15a|sh-2|sh2	myosin XV	protein-coding
17868	chr3	126606751	126607251	intron (NM_023813, intron 2 of 17)	intron (NM_023813, intron 2 of 17)	10050	NM_001025439	108058	Mm.255822	NM_023813	ENSMUSG00000053819	Camk2d	2810011D23Rik|8030469K03Rik|CaMK II|[d]-CaMKII	calcium/calmodulin-dependent protein kinase II, delta	protein-coding
3425	chr11	4035371	4035871	intron (NM_146013, intron 2 of 11)	RMER10A|LTR|ERVL	3839	NM_146013	103655	Mm.337476	NM_146013	ENSMUSG00000019368	Sec14l4	AI256582|AW536553|SPF|TAP	SEC14-like 4 (S. cerevisiae)	protein-coding
4918	chr11	95393399	95393899	Intergenic	Intergenic	8727	NM_016752	110172	Mm.4593	NM_016752		Slc35b1	Ugalt2	solute carrier family 35, member B1	protein-coding
18807	chr4	95389553	95390053	Intergenic	Intergenic	-167704	NM_001113412	75578	Mm.276098	NM_029347	ENSMUSG00000028573	Fggy	2310009E04Rik	FGGY carbohydrate kinase domain containing	protein-coding
2997	chr10	91429181	91429681	Intergenic	MER5A1|DNA|hAT-Charlie	-257812	NM_001080129	21917	Mm.159684	NM_011605	ENSMUSG00000019961	Tmpo	5630400D24Rik|AI195756|AI606875|AW214352|AW547477|LAP2|TP	thymopoietin	protein-coding
15820	chr2	128240462	128240962	Intergenic	Intergenic	113137	NM_001284410	12125	Mm.141083	NM_009754	ENSMUSG00000027381	Bcl2l11	1500006F24Rik|Bim|Bod|bcl2-L-11	BCL2-like 11 (apoptosis facilitator)	protein-coding
18157	chr4	6466989	6467489	Intergenic	RLTR17|LTR|ERVK	-12968	NM_010945	18201	Mm.3059	NM_010945	ENSMUSG00000028245	Nsmaf	AA959567|C630007J05|Fan	neutral sphingomyelinase (N-SMase) activation associated factor	protein-coding
2181	chr10	33940662	33941162	intron (NM_028287, intron 4 of 9)	MLT2B3|LTR|ERVL	10300	NM_028287	72580	Mm.479929	NM_028287	ENSMUSG00000039531	Zufsp	2700019D07Rik	zinc finger with UFM1-specific peptidase domain	protein-coding
1842	chr1	191515889	191516389	Intergenic	Intergenic	59395	NM_029766	76843	Mm.189102	NM_029766	ENSMUSG00000037474	Dtl	2810047L02Rik|5730564G15Rik|Ramp	denticleless homolog (Drosophila)	protein-coding
9593	chr15	74539860	74540360	intron (NM_174991, intron 5 of 30)	intron (NM_174991, intron 5 of 30)	23914	NM_174991	107831	Mm.43133	NM_174991	ENSMUSG00000034730	Bai1	B830018M07Rik|R75078|mKIAA4089	brain-specific angiogenesis inhibitor 1	protein-coding
6186	chr12	72649768	72650268	TTS (NM_025522)	TTS (NM_025522)	14810	NM_025522	66375	Mm.289653	NM_025522	ENSMUSG00000021094	Dhrs7	2310016E22Rik|5730564L20Rik|AW061210|Retdsr4|Retsdr4	dehydrogenase/reductase (SDR family) member 7	protein-coding
20805	chr5	75481547	75482047	Intergenic	Intergenic	-93190	NM_001122733	16590	Mm.247073	NM_021099	ENSMUSG00000005672	Kit	Bs|CD117|Fdc|Gsfsco1|Gsfsco5|Gsfsow3|SCO1|SCO5|SOW3|Ssm|Tr-kit|W|c-KIT	kit oncogene	protein-coding
33	chr1	7671685	7672185	Intergenic	ERVB7_3-LTR_MM|LTR|ERVK	583015	NM_183028	319263	Mm.21539	NM_183028	ENSMUSG00000051285	Pcmtd1	8430411F12Rik|A030012M09Rik	protein-L-isoaspartate (D-aspartate) O-methyltransferase domain containing 1	protein-coding
24226	chr7	34327541	34328041	Intergenic	B1_Mur2|SINE|Alu	-42182	NM_172741	233103	Mm.491097	NM_172741	ENSMUSG00000066571	4931406P16Rik	AA553327|mKIAA0355	RIKEN cDNA 4931406P16 gene	protein-coding
23604	chr6	146686394	146686894	Intergenic	Intergenic	29426	NR_046277	74925	Mm.386304	NR_046277	ENSMUSG00000085238	4930479D17Rik	-	RIKEN cDNA 4930479D17 gene	ncRNA
23685	chr7	4464459	4464959	promoter-TSS (NM_001290416)	promoter-TSS (NM_001290416)	-26	NM_026146	67425	Mm.360392	NM_026146	ENSMUSG00000006154	Eps8l1	2310051G19Rik|4632407K17Rik|AW060268|DRC3|EPS8R1	EPS8-like 1	protein-coding
24207	chr7	30846514	30847014	Intergenic	Intergenic	9414	NM_001033316	233080	Mm.291167	NM_001033316	ENSMUSG00000019429	Ffar3	Gm478|Gpr41	free fatty acid receptor 3	protein-coding
12829	chr18	30884975	30885475	Intergenic	RLTR13D6|LTR|ERVK	431903	NM_009065	19762	Mm.5163	NM_009065	ENSMUSG00000057455	Rit2	RIBA|Rin|Roc2	Ras-like without CAAX 2	protein-coding
6246	chr12	77195034	77195534	Intergenic	Intergenic	-42820	NM_016893	53618	Mm.35628	NM_016893	ENSMUSG00000021065	Fut8	-	fucosyltransferase 8	protein-coding
2891	chr10	83508893	83509393	intron (NM_153543, intron 10 of 22)	intron (NM_153543, intron 10 of 22)	24997	NM_153543	216188	Mm.263138	NM_153543	ENSMUSG00000020256	Aldh1l2	D330038I09Rik|mtFDH	aldehyde dehydrogenase 1 family, member L2	protein-coding
2532	chr10	69570823	69571323	intron (NM_170730, intron 1 of 17)	RMER17C|LTR|ERVK	37365	NM_170730	11735	Mm.235960	NM_009670	ENSMUSG00000069601	Ank3	2900054D09Rik|AI314020|Ank-3|AnkG|Ankyrin-3|Ankyrin-G	ankyrin 3, epithelial	protein-coding
6397	chr12	85613773	85614273	intron (NM_030887, intron 2 of 3)	intron (NM_030887, intron 2 of 3)	14005	NM_001205053	81703	Mm.103560	NM_030887	ENSMUSG00000034271	Jdp2	Jundm2|Jundp2|TIF	Jun dimerization protein 2	protein-coding
15472	chr2	101726021	101726521	intron (NM_001083810, intron 8 of 8)	RMER17B|LTR|ERVK	47831	NM_009424	22034	Mm.292729	NM_009424	ENSMUSG00000027164	Traf6	2310003F17Rik|AI851288|C630032O20Rik	TNF receptor-associated factor 6	protein-coding
10573	chr16	20072695	20073195	Intergenic	RMER10A|LTR|ERVL	-24609	NM_029436	75785	Mm.392450	NM_029436	ENSMUSG00000062901	Klhl24	1110046J11Rik|4930429H24Rik|6530402O20Rik|C85082	kelch-like 24	protein-coding
15349	chr2	86394117	86394617	Intergenic	RLTR13E|LTR|ERVK	-7951	NM_146391	258386	Mm.377471	NM_146391	ENSMUSG00000075186	Olfr1058	MOR190-2	olfactory receptor 1058	protein-coding
6174	chr12	71577392	71577892	Intergenic	B3A|SINE|B2	37035	NR_045941	73815	Mm.416916	NR_045941		4930404H11Rik	-	RIKEN cDNA 4930404H11 gene	ncRNA
29464	chrX	144314413	144314913	Intergenic	RMER10A|LTR|ERVL	-3303	NR_037145	67574	Mm.249084	NM_026247	ENSMUSG00000041718	Alg13	2810046O15Rik|4833435D08Rik|Glt28d1|MDS031|OTTMUSG00000018917	asparagine-linked glycosylation 13	protein-coding
20793	chr5	74702688	74703188	promoter-TSS (NM_001159577)	promoter-TSS (NM_001159577)	-35	NM_001159577	16924	Mm.440403	NM_010727	ENSMUSG00000029228	Lnx1	Lnx	ligand of numb-protein X 1	protein-coding
13957	chr19	34272728	34273228	Intergenic	Intergenic	-17605	NM_007392	11475	Mm.213025	NM_007392		Acta2	0610041G09Rik|Actvs|SMalphaA|a-SMA|alphaSMA	actin, alpha 2, smooth muscle, aorta	protein-coding
21328	chr5	118481226	118481726	Intergenic	RMER17C|LTR|ERVK	-79243	NM_172424	76199	Mm.206238	NM_172424	ENSMUSG00000018076	Med13l	2210413I17Rik|6330591G05Rik|9030618F05Rik|Thrap2|Trap240L|mKIAA1025	mediator complex subunit 13-like	protein-coding
2560	chr10	70587883	70588383	intron (NM_178621, intron 1 of 4)	RMER6B|LTR|ERVK	4679	NM_001162846	70911	Mm.19825	NM_178621	ENSMUSG00000037747	Phyhipl	4921522K17Rik|AI267048	phytanoyl-CoA hydroxylase interacting protein-like	protein-coding
7955	chr13	106265695	106266195	Intergenic	RLTR13E|LTR|ERVK	670970	NM_029665	76582	Mm.132208	NM_029665	ENSMUSG00000042590	Ipo11	1700081H05Rik|2510001A17Rik|AI314624|AW555235|E330021B14Rik|Ranbp11	importin 11	protein-coding
