# Supplementary material for: Differential ERK activity shapes the epiblast methylome influencing cell-context response to germ-layer differentiation signals.
Source: Research Square preprint supplement (doi:10.21203/rs.3.rs-3092600/v1), 2023-06-26
Supplement: Supplementary file 13 [file Supplementary Data 5.xlsx]

## Sheet: DMG_CLDN6LowVsHigh_EpiSC
0610040J01Rik
1110008L16Rik
1110051M20Rik
1190002N15Rik
1500009L16Rik
1700001F09Rik
1700003H04Rik
1700006A11Rik
1700007G11Rik
1700008P02Rik
1700009N14Rik
1700010I14Rik
1700012B07Rik
1700015F17Rik
1700015G11Rik
1700016D06Rik
1700017B05Rik
1700017N19Rik
1700018B08Rik
1700020N01Rik
1700024G13Rik
1700025G04Rik
1700029F12Rik
1700029H14Rik
1700040L02Rik
1700066M21Rik
1700113H08Rik
1700123L14Rik
1700125H20Rik
1700129C05Rik
1810011O10Rik
1810013L24Rik
1810024B03Rik
1810046K07Rik
1810062G17Rik
2010300C02Rik
2010315B03Rik
2210010C04Rik
2300009A05Rik
2310057J18Rik
2410089E03Rik
2410141K09Rik
2510009E07Rik
2610001J05Rik
2610301B20Rik
2700062C07Rik
2810474O19Rik
2900026A02Rik
2900092C05Rik
3100002H09Rik
3110009E18Rik
3110018I06Rik
3110035E14Rik
3110043O21Rik
3425401B19Rik
4833423E24Rik
4921509C19Rik
4921530L21Rik
4930402H24Rik
4930407I10Rik
4930430A15Rik
4930433I11Rik
4930447A16Rik
4930447C04Rik
4930452B06Rik
4930467E23Rik
4930474N05Rik
4930505A04Rik
4930522H14Rik
4930544G11Rik
4930546C10Rik
4930553M12Rik
4930558C23Rik
4930558K02Rik
4930564D02Rik
4930572O03Rik
4930579G24Rik
4930583I09Rik
4930596D02Rik
4931408C20Rik
4931417E11Rik
4931423N10Rik
4931428L18Rik
4931429L15Rik
4931440F15Rik
4932414N04Rik
4933402J07Rik
4933402N22Rik
4933405O20Rik
4933412E24Rik
4933415F23Rik
4933425L06Rik
4933428G20Rik
4933430I17Rik
5430403G16Rik
5430419D17Rik
5530400C23Rik
5530401A14Rik
5730480H06Rik
5730507C01Rik
5730522E02Rik
6030419C18Rik
6030452D12Rik
6030498E09Rik
6720489N17Rik
8030423J24Rik
9130204L05Rik
9130401M01Rik
9130409I23Rik
9230109A22Rik
9230113P08Rik
9330182L06Rik
9530002B09Rik
9530053A07Rik
9530077C05Rik
9630041A04Rik
9930021J03Rik
A130051J06Rik
A1bg
A230065H16Rik
A230072I06Rik
A26c2
A2m
A2ml1
A330070K13Rik
A430005L14Rik
A4galt
A530032D15Rik
A530064D06Rik
A630010A05Rik
A830005F24Rik
A830018L16Rik
A930003A15Rik
A930033H14Rik
Aacs
Aard
Aasdh
Aass
Abca12
Abca13
Abca15
Abca8a
Abca9
Abcb1a
Abcb4
Abcb5
Abcc12
Abcc2
Abcc3
Abcc4
Abcc5
Abcc9
Abcd2
Abcd3
Abcg2
Abi2
Abl1
Ablim3
Abo
Abra
Abt1
Abtb2
Acaa2
Acad8
Acadsb
Acbd6
Acmsd
Acnat2
Aco1
Acot12
Acoxl
Acp6
Acsbg1
Acsl1
Acsm1
Acss3
Actbl2
Actl7b
Actl9
Actn4
Actr3
Actrt3
Acvr1
Acvr1b
Acvr1c
Acvr2a
Acyp2
Adam23
Adam24
Adam29
Adam3
Adam34
Adam4
Adam5
Adam6a
Adam6b
Adam7
Adamts12
Adamts15
Adamts17
Adamts2
Adamts20
Adamts6
Adamts9
Adamtsl1
Adamtsl3
Adarb1
Adarb2
Adcy1
Adcy2
Adcy8
Adcyap1
Adgra1
Adgra3
Adgrb1
Adgrb3
Adgre4
Adgrf5
Adgrg6
Adgrl2
Adgrl3
Adgrl4
Adipor2
Ado
Adora3
Adpgk
Adra1b
Adra2a
Adra2b
Adra2c
Adss
Aebp2
AF366264
AF529169
Afdn
Aftph
Aga
Agap1
Agbl1
Agbl4
Agk
Agmo
Ago1
Ago2
Agpat3
Agpat4
Agr3
Agtpbp1
Agtr1b
Agxt
Ahcyl2
Ahi1
AI464131
AI593442
AI987944
Aig1
Aimp1
Ajap1
Ak4
Ak5
Akain1
Akap1
Akap11
Akap13
Akap6
Akap7
Akirin2
Akr1c14
Akr1d1
Akr1e1
Alad
Alcam
Aldh1a1
Aldh1b1
Aldh1l1
Aldh1l2
Aldh3a2
Aldh6a1
Aldh8a1
Aldoart1
Alg10b
Alk
Alkbh3
Alkbh5
Alkbh8
Alms1
Alox12
Alox12b
Alox12e
Als2cl
Alx1
Alx3
Alx4
Ambra1
Amd2
Amer2
Amigo2
Amotl1
Ampd1
Ampd3
Amph
Amy2a5
Anapc1
Anapc15-ps
Angpt1
Angptl3
Ank2
Ank3
Ankar
Ankdd1b
Ankef1
Ankfy1
Ankmy1
Ankrd12
Ankrd16
Ankrd26
Ankrd28
Ankrd31
Ankrd33b
Ankrd34c
Ankrd44
Ankrd45
Ankrd49
Ankrd50
Ankrd55
Ankrd7
Anks1b
Ano10
Ano2
Ano3
Ano4
Ano5
Anp32b
Anxa1
Anxa10
Anxa11
Anxa4
Aoah
Aox3
Ap3b1
Ap4b1
Ap4e1
Apaf1
Apba1
Apba2
Apba3
Apbb1ip
Apc2
Apcs
Api5
Apip
Apob
Apol6
Apol7e
Apol8
App
Appl1
Aqp3
Arap2
Arfgef1
Arglu1
Arhgap1
Arhgap10
Arhgap12
Arhgap18
Arhgap20
Arhgap21
Arhgap24
Arhgap25
Arhgap26
Arhgap32
Arhgap33
Arhgap39
Arhgap42
Arhgef16
Arhgef2
Arhgef26
Arhgef3
Arhgef33
Arid1b
Arid2
Arih1
Arl14ep
Arl15
Arl2
Arl4a
Arl4c
Arl5b
Arl6
Armc1
Armc2
Armc3
Armc4
Arntl
Arpc5
Arpp19
Arpp21
Arrdc3
Arrdc4
Arsa
Arsb
Art2b
Artn
Asap2
Asb13
Asb14
Asb15
Asb18
Ascc3
Ascl1
Asgr1
Asgr2
Asic1
Asic2
Asmt
Asnsd1
Asrgl1
Astn1
Astn2
Asxl1
Asxl3
Atad2b
Atf2
Atf3
Atf7ip
Atg10
Atg14
Atg16l2
Atg2a
Atg5
Atg7
Atic
Atl1
Atl2
Atm
Atoh1
Atoh7
Atoh8
Atp10a
Atp11b
Atp12a
Atp13a3
Atp13a4
Atp13a5
Atp1b3
Atp23
Atp2b1
Atp2c2
Atp5g3
Atp5o
Atp6ap1l
Atp6v0a1
Atp6v0a2
Atp6v0d2
Atp6v1c1
Atp6v1g3
Atp6v1h
Atp8a1
Atp8a2
Atp8b1
Atp8b4
Atrn
Atrnl1
Atxn1
Atxn7l1
Atxn7l3b
AU018091
AU041133
Aurkc
Auts2
Aven
Avp
Avpr1a
Avpr1b
AW209491
AW549877
AW554918
AW822073
Axin2
AY074887
Azi2
Azin1
B020004J07Rik
B020011L13Rik
B230307C23Rik
B3galnt1
B3galt1
B3galt2
B3gat1
B3gat2
B430305J03Rik
B4galnt3
B4galt1
B4galt4
B930094E09Rik
Babam2
Bach1
Bach2
Bambi
Bank1
Bard1
Barhl2
Barx1
Barx2
Basp1
Bax
Baz1a
Baz2b
Bbs1
Bbs10
Bbs4
Bbs5
Bbs9
Bbx
BC005561
BC030500
BC030870
BC048403
BC048507
BC049762
BC052040
BC067074
BC107364
Bcan
Bcap29
Bcar3
Bcas1
Bcas3
Bcat1
Bcdin3d
Bche
Bckdhb
Bcl11a
Bcl11b
Bcl2
Bcl2a1c
Bcl2l11
Bcl6
Bclaf1
Bcs1l
Bend4
Bend5
Best3
Bet1
Bhlhe23
Bhlhe40
Bicc1
Bicd1
Bicdl1
Bmi1
Bmp2
Bmp3
Bmp5
Bmp7
Bmp8a
Bmper
Bmpr1b
Bmt2
Bnc2
Bod1
Bod1l
Boll
Borcs5
Bpgm
Bpifa2
Bpifa3
Bpifa6
Bpifb9a
Bptf
Braf
Brd7
Brinp1
Brinp2
Brinp3
Brsk1
Btaf1
Btbd11
Btbd16
Btbd3
Btbd35f11
Btbd35f27
Btbd35f5
Btbd9
Btd
Btg1
Btn1a1
Btnl9
Bub3
C030005K15Rik
C130026I21Rik
C130060K24Rik
C1ql3
C1ql4
C1qtnf7
C1qtnf9
C1rb
C2cd2l
C2cd4b
C2cd5
C2cd6
C330018D20Rik
C5ar1
C6
C7
Cab39
Cabp2
Cachd1
Cacna1a
Cacna1b
Cacna1c
Cacna1e
Cacna2d1
Cacna2d2
Cacna2d3
Cacnb2
Cacng2
Cacng5
Cacybp
Cadm1
Cadm2
Cadm4
Cadps
Calb1
Calb2
Calca
Calcoco1
Calcr
Calcrl
Cald1
Calm1
Camk1d
Camk1g
Camk2b
Camk2d
Camk2n1
Camk2n2
Camkmt
Camta1
Cand1
Capn13
Capn2
Caps2
Capza3
Car10
Car12
Car8
Card11
Carnmt1
Casd1
Casp12
Casp14
Casr
Cast
Catsperb
Catsperg1
Cavin2
Cavin4
Cbfb
Cblb
Cbll1
Cbln1
Cbln2
Cbln4
Cbr4
Cbx4
Cby3
Cc2d2b
Ccar1
Ccdc112
Ccdc126
Ccdc134
Ccdc141
Ccdc148
Ccdc15
Ccdc150
Ccdc152
Ccdc171
Ccdc172
Ccdc175
Ccdc191
Ccdc28a
Ccdc3
Ccdc33
Ccdc50
Ccdc51
Ccdc54
Ccdc59
Ccdc6
Ccdc60
Ccdc63
Ccdc68
Ccdc71l
Ccdc81
Ccdc83
Ccdc85a
Ccdc88b
Ccdc89
Ccdc90b
Ccdc96
Cck
Cckar
Cckbr
Ccl1
Ccl8
Ccna1
Ccnb2
Ccnd2
Ccng1
Ccng2
Ccnh
Ccnl1
Ccr1
Ccr2
Ccr4
Ccr5
Ccsap
Ccser1
Ccser2
Cct6b
Cd101
Cd109
Cd164
Cd180
Cd1d1
Cd2
Cd207
Cd226
Cd244
Cd24a
Cd2bp2
Cd300a
Cd300ld3
Cd33
Cd36
Cd47
Cd55b
Cd83
Cd9
Cdc16
Cdc42bpb
Cdc42ep2
Cdc42ep3
Cdc42se2
Cdc5l
Cdc7
Cdca7
Cdca7l
Cdh10
Cdh11
Cdh12
Cdh13
Cdh16
Cdh18
Cdh19
Cdh2
Cdh20
Cdh23
Cdh26
Cdh4
Cdh5
Cdh6
Cdh7
Cdh8
Cdh9
Cdk1
Cdk10
Cdk13
Cdk14
Cdk15
Cdk17
Cdk18
Cdk19
Cdk5r1
Cdk5r2
Cdk5rap2
Cdk6
Cdk8
Cdkal1
Cdkl3
Cdkn1c
Cdkn2a
Cdkn2aip
Cdkn2b
Cdkn2c
Cdkn3
Cdrt4
Cds1
Cdyl
Cdyl2
Cela3a
Celf2
Celf4
Celf6
Cenpc1
Cenpe
Cenpf
Cenpq
Cenpw
Cep112
Cep170
Cep192
Cep350
Cep41
Cep57
Cep68
Cep83
Cep85l
Ces1d
Ces1h
Ces2a
Ces2e
Ces5a
Cetn3
Cfap161
Cfap44
Cfap46
Cfap58
Cfap65
Cfdp1
Cfh
Cfl2
Cgnl1
Chchd3
Chd2
Chd6
Chd7
Chd8
Chd9
Chia1
Chic2
Chil3
Chil4
Chl1
Chmp2b
Chmp7
Chn1
Chordc1
Chrm1
Chrm2
Chrm3
Chrna1
Chrna7
Chrna9
Chst1
Chst15
Chst2
Chsy3
Ciart
Cic
Cited2
CK137956
Ckap4
Clasp1
Clasp2
Clca1
Clca2
Clcf1
Cldn11
Cldn8
Clec10a
Clec14a
Clec2l
Clec4a1
Clec4a2
Clec4a3
Clec4b1
Clec4b2
Clec9a
Clic5
Clic6
Clint1
Clip4
Clmp
Cln8
Clnk
Clns1a
Clpx
Clstn2
Clstn3
Cltc
Clvs1
Clvs2
Clybl
Cmah
Cmas
Cmip
Cmss1
CN725425
Cnbd1
Cnbp
Cnga1
Cngb1
Cngb3
Cnih3
Cnksr3
Cnmd
Cnn3
Cnnm1
Cnnm2
Cnot10
Cnot2
Cnot4
Cnr1
Cntln
Cntn1
Cntn3
Cntn4
Cntn5
Cntn6
Cntnap2
Cntnap4
Cntnap5a
Cntnap5b
Cntnap5c
Coa6
Cobl
Coch
Cog6
Cog7
Col11a1
Col12a1
Col13a1
Col14a1
Col19a1
Col1a2
Col22a1
Col25a1
Col26a1
Col3a1
Col5a1
Col8a1
Col9a1
Colec10
Commd10
Commd2
Commd3
Commd8
Copb2
Cops7b
Cops8
Coq8a
Corin
Coro6
Coro7
Cox18
Cox6c
Cox7b2
Cox7c
Cpa5
Cpa6
Cpe
Cpeb2
Cpeb4
Cplx2
Cpm
Cpn2
Cpne2
Cpne3
Cpne4
Cpne8
Cpped1
Cps1
Cpsf2
Cpsf6
Cpxm2
Cpz
Cr1l
Cr2
Cracr2a
Cradd
Crb1
Creb1
Creb3
Creb3l1
Creb3l2
Creb5
Crebbp
Crebrf
Crem
Crh
Crim1
Crisp1
Crisp3
Crisp4
Crispld1
Crlf2
Crmp1
Crnkl1
Crnn
Crp
Crtac1
Cry1
Cryba4
Crybg1
Crygn
Cryz
Cse1l
Csf2ra
Csf3r
Csgalnact2
Csl
Csmd1
Csmd3
Csn3
Csnk1g3
Csnk2a2
Csnka2ip
Cspp1
Csrnp3
Cst10
Cstad
Cstf3
Ctbp2
Ctgf
Cth
Cthrc1
Ctif
Ctla4
Ctnna2
Ctnna3
Ctnnb1
Ctnnbl1
Ctnnd2
Cts7
Ctsc
Ctsj
Ctsll3
Cttn
Cubn
Cul1
Cul3
Cutc
Cwc22
Cwc27
Cwh43
Cxadr
Cxcl10
Cxcl12
Cxcr4
Cxxc4
Cxxc5
Cyb561
Cycs
Cylc2
Cyp1b1
Cyp21a1
Cyp26a1
Cyp26b1
Cyp2a12
Cyp2a4
Cyp2b10
Cyp2c40
Cyp2c65
Cyp2c67
Cyp2d22
Cyp2d9
Cyp2j11
Cyp2j5
Cyp2r1
Cyp3a11
Cyp3a16
Cyp3a25
Cyp3a41a
Cyp3a41b
Cyp3a44
Cyp3a57
Cyp3a59
Cyp4a12a
Cyp4a12b
Cyp4f14
Cyp4f15
Cyp4f16
Cyp4f37
Cyp4x1
Cyp51
Cyp7b1
Cyp8b1
Cypt12
Cysltr2
Cystm1
Cyth1
Cytip
Cyyr1
D130040H23Rik
D130052B06Rik
D16Ertd472e
D1Ertd622e
D1Pas1
D3Ertd751e
D430041D05Rik
D630036H23Rik
D630039A03Rik
D6Ertd527e
Daam1
Dab1
Dab2
Dab2ip
Dach1
Dact1
Dact2
Dad1
Dapl1
Dars
Dazl
Dbx1
Dbx2
Dcbld2
Dcc
Dcdc2a
Dchs1
Dchs2
Dclk1
Dclk2
Dcn
Dcp1a
Dcp2
Dct
Dctd
Dcun1d4
Dcx
Ddhd1
Ddi1
Ddit4
Ddx10
Ddx18
Ddx20
Ddx50
Ddx6
Dedd2
Def8
Defb33
Defb41
Defb7
Dennd1a
Dennd1b
Dennd3
Dennd6a
Depdc1a
Depdc1b
Des
Desi2
Dgkb
Dgkg
Dhrs2
Dhx15
Dhx35
Dhx9
Diaph3
Dicer1
Dido1
Diexf
Dio2
Dio3
Diras1
Diras2
Dirc2
Dis3l
Dis3l2
Disc1
Disp3
Dkk1
Dkk2
Dkk3
Dkkl1
Dleu7
Dlg1
Dlg2
Dlgap1
Dlgap2
Dlgap3
Dlk1
Dlst
Dlx2
Dlx6
Dmap1
Dmrt1
Dmrt2
Dmrta1
Dmrta2
Dmrtb1
Dmxl1
Dmxl2
Dna2
Dnah14
Dnah2
Dnah5
Dnah6
Dnah7a
Dnah7b
Dnah7c
Dnah8
Dnah9
Dnajb12
Dnajb4
Dnajb9
Dnajc1
Dnajc10
Dnajc19
Dnajc24
Dnajc27
Dnajc6
Dnajc8
Dner
Dnm3
Dnmt3a
Dntt
Doc2b
Dock1
Dock10
Dock2
Dock4
Dock8
Dok1
Dok5
Dok6
Dpf3
Dph6
Dpp10
Dpp4
Dpp6
Dpt
Dpyd
Dpys
Dpysl5
Dr1
Drd1
Drd2
Drd3
Drd5
Dsc1
Dsc3
Dscam
Dscc1
Dsel
Dsg1c
Dthd1
Dtna
Dtnb
Dtnbp1
Dtwd1
Dtwd2
Dupd1
Dusp10
Dusp11
Dusp14
Dusp22
Dusp26
Dusp6
Duxf3
Dydc1
Dynap
Dync1i1
Dync1i2
Dync2h1
Dynlt1b
Dynlt1c
Dyrk1a
Dyrk2
Dysf
Dytn
E030018B13Rik
E030030I06Rik
E130308A19Rik
E2f7
E2f8
Ebf1
Ebf3
Ece1
Ect2
Edar
Edaradd
Edem1
Edil3
Edn1
Edn2
Edn3
Ednra
Ednrb
Eea1
Eef2kmt
Eefsec
Eepd1
Efcab1
Efcab10
Efcab11
Efcab3
Efcab5
Efhb
Efhc1
Efhd2
Efna2
Efna3
Efna5
Efnb2
Efr3a
Efr3b
Egf
Egfem1
Egln1
Egln3
Egr4
Ehbp1
Eid1
Eif1b
Eif2b2
Eif2b5
Eif3d
Eif3m
Eif4g2
Eif4g3
Elac2
Elf2
Elfn1
Elfn2
Ell2
Elmo1
Elmo2
Elovl4
Elovl5
Elovl6
Elovl7
Elp3
Elp6
Emb
Emcn
Emid1
Emilin2
Emilin3
Emp1
Emx1
Enc1
Engase
Enho
Eno1b
Enox1
Enpep
Enpp2
Enpp6
ENSMUSG00000112187
Enthd1
Entpd1
Entpd5
Eomes
Ep400
Epas1
Epb41l2
Epb41l3
Epb41l4a
Epc1
Epcam
Epha3
Epha4
Epha5
Epha6
Epha7
Epha8
Ephb1
Ephb4
Epm2a
Epn2
Epop
Epyc
Eqtn
Erap1
Erbb4
Erc2
Ercc3
Ercc4
Erdr1
Erg
Ergic2
Ern1
Errfi1
Erv3
Esd
Esp15
Esp16
Esp23
Esp24
Esp34
Esp36
Esp38
Esr1
Esr2
Esrrb
Esrrg
Etl4
Etnk1
Etnppl
Ets1
Etv1
Etv5
Etv6
Evc2
Evx1
Evx2
Exoc1
Exoc3
Exoc4
Exoc6
Exoc6b
Ext1
Eya1
Eya4
Ezh2
Ezr
F11
F13a1
F2rl3
F3
Fabp2
Fabp5
Fabp7
Fads2
Faf1
Faf2
Fam105a
Fam107b
Fam109a
Fam110a
Fam110b
Fam110c
Fam120a
Fam122a
Fam133b
Fam135a
Fam135b
Fam13a
Fam13c
Fam155a
Fam159b
Fam161a
Fam162b
Fam163b
Fam169b
Fam170a
Fam172a
Fam173b
Fam174a
Fam174b
Fam181b
Fam184a
Fam184b
Fam189a1
Fam198b
Fam19a2
Fam19a4
Fam19a5
Fam204a
Fam207a
Fam208a
Fam20a
Fam210a
Fam213b
Fam214a
Fam229b
Fam240b
Fam26d
Fam26e
Fam43a
Fam49a
Fam50b
Fam53a
Fam53b
Fam58b
Fam71d
Fam76b
Fam78b
Fam81b
Fam83a
Fam83b
Fam83h
Fam84a
Fam92a
Fam96b
Fancc
Fancl
Fank1
Far2
Farp1
Fasl
Fat1
Fat2
Fat3
Fat4
Faxc
Fbln1
Fbln7
Fbn1
Fbn2
Fbp1
Fbrsl1
Fbxl17
Fbxl21
Fbxl4
Fbxl7
Fbxo11
Fbxo21
Fbxo32
Fbxo33
Fbxo4
Fbxo42
Fbxo7
Fbxo8
Fbxw21
Fbxw26
Fbxw27
Fbxw4
Fbxw7
Fbxw8
Fcamr
Fcgr1
Fcgr3
Fcho1
Fchsd2
Fech
Fem1c
Fer
Fer1l6
Ferd3l
Fermt1
Fermt2
Fez1
Fez2
Fezf1
Fezf2
Fgd2
Fgd3
Fgd4
Fgd5
Fgf1
Fgf10
Fgf12
Fgf14
Fgf20
Fgf5
Fgf6
Fgf9
Fgfbp1
Fgfr1
Fgfr2
Fgfr3
Fggy
Fgl2
Fhit
Fhl2
Fhl4
Fhod3
Fign
Fignl1
Fignl2
Filip1
Fjx1
Fkbp11
Fktn
Flrt2
Flrt3
Flt1
Flt4
Fmo9
Fn1
Fndc1
Fndc5
Fnip1
Fnip2
Focad
Fos
Fosb
Foxa1
Foxa2
Foxb1
Foxc1
Foxd1
Foxd3
Foxf2
Foxg1
Foxi2
Foxi3
Foxj2
Foxj3
Foxk1
Foxl1
Foxl2
Foxn3
Foxo1
Foxp1
Foxp2
Foxq1
Fpr-rs4
Fras1
Frem1
Frg1
Frk
Frmd4b
Frmd6
Frmpd1
Frzb
Fscb
Fshb
Fshr
Fsip2
Fst
Fstl1
Fstl4
Fstl5
Fthl17a
Ftmt
Fuca2
Fut10
Fut8
Fut9
Fxn
Fxr1
Fyb
Fyn
Fzd1
Fzd3
Fzd4
Fzd7
Fzd9
G0s2
G430095P16Rik
G6pd2
Gab2
Gabbr1
Gabra1
Gabra2
Gabrb1
Gabrb2
Gabrb3
Gabrg1
Gabrg2
Gabrg3
Gabrr1
Gad1
Gad2
Gadd45g
Gadl1
Galc
Galm
Galnt13
Galnt14
Galnt16
Galnt18
Galnt2
Galnt5
Galnt7
Galntl6
Galr1
Gap43
Gapvd1
Garem1
Gas1
Gas7
Gata3
Gata4
Gata6
Gatb
Gatsl2
Gbe1
Gbp10
Gbp5
Gbp7
Gbx1
Gc
Gca
Gcc1
Gcc2
Gcfc2
Gckr
Gclm
Gcm1
Gcnt2
Gcnt4
Gda
Gdap1
Gdap2
Gdf6
Gdi2
Gdnf
Gfi1
Gfra2
Gfral
Ggact
Ggh
Ggta1
Ghitm
Ghr
Gimd1
Gins3
Gipc1
Gja1
Gja10
Gjb5
Gjd2
Gk2
Gk5
Gkap1
Glb1l3
Glcci1
Gldc
Gldn
Gli2
Gli3
Glipr1
Glipr1l1
Glipr1l2
Glis1
Glis3
Glo1
Glp1r
Glra1
Glra3
Glrx3
Gls
Glt1d1
Glt28d2
Glud1
Glul
Gm10020
Gm10076
Gm10093
Gm10097
Gm10110
Gm10118
Gm10139
Gm10184
Gm10188
Gm10192
Gm10217
Gm10220
Gm10234
Gm10260
Gm10283
Gm10295
Gm10306
Gm10308
Gm10320
Gm10324
Gm10330
Gm10338
Gm10354
Gm10358
Gm10384
Gm10406
Gm1043
Gm10436
Gm10471
Gm10479
Gm10549
Gm10644
Gm10663
Gm10696
Gm10717
Gm10719
Gm10721
Gm10722
Gm10750
Gm10767
Gm10772
Gm10800
Gm10801
Gm10803
Gm10837
Gm10944
Gm10945
Gm11011
Gm11042
Gm11077
Gm11096
Gm11099
Gm11111
Gm11114
Gm11127
Gm11146
Gm11214
Gm11232
Gm11487
Gm11492
Gm11563
Gm11639
Gm12117
Gm12666
Gm12689
Gm12695
Gm12728
Gm12789
Gm12830
Gm12886
Gm12887
Gm12888
Gm13090
Gm13128
Gm13212
Gm13283
Gm13691
Gm13941
Gm14025
Gm14444
Gm14496
Gm15130
Gm15217
Gm1527
Gm15319
Gm15446
Gm15737
Gm16223
Gm16432
Gm16494
Gm16503
Gm17087
Gm17332
Gm17455
Gm1979
Gm19965
Gm20604
Gm2075
Gm20939
Gm21060
Gm2115
Gm21293
Gm21370
Gm21411
Gm21738
Gm21874
Gm21903
Gm21949
Gm21973
Gm2310
Gm2381
Gm266
Gm28363
Gm2888
Gm29106
Gm2916
Gm3115
Gm3149
Gm3278
Gm3424
Gm34302
Gm3453
Gm3476
Gm3486
Gm35911
Gm3594
Gm3604
Gm3642
Gm3727
Gm38100
Gm38393
Gm3952
Gm4181
Gm4301
Gm4340
Gm43517
Gm45783
Gm4791
Gm4846
Gm4847
Gm4861
Gm4881
Gm4884
Gm4894
Gm4951
Gm498
Gm5065
Gm5096
Gm5114
Gm5136
Gm5150
Gm5160
Gm5218
Gm527
Gm5286
Gm5407
Gm5415
Gm5426
Gm5447
Gm5458
Gm5519
Gm5591
Gm5592
Gm5662
Gm5773
Gm5849
Gm5861
Gm5868
Gm5916
Gm5926
Gm595
Gm597
Gm6020
Gm6133
Gm6337
Gm6569
Gm6576
Gm6588
Gm6594
Gm6614
Gm6619
Gm6657
Gm6741
Gm6793
Gm6811
Gm6899
Gm7030
Gm7257
Gm7275
Gm7298
Gm7334
Gm7347
Gm7361
Gm7489
Gm7535
Gm765
Gm7735
Gm7945
Gm7970
Gm8127
Gm8138
Gm815
Gm826
Gm8300
Gm8332
Gm8356
Gm8369
Gm8973
Gm9008
Gm906
Gm9195
Gm94
Gm9493
Gm9513
Gm973
Gm9733
Gm9747
Gm9772
Gm9817
Gm9857
Gm9972
Gmds
Gmnc
Gnal
Gnao1
Gnaq
Gnas
Gnat3
Gnaz
Gnb2
Gnb4
Gne
Gng10
Gng13
Gng2
Gng4
Gng7
Gnpda1
Gnpda2
Gnpnat1
Gns
Golga3
Golga5
Golim4
Golph3
Gorasp2
Got1l1
Got2
Gp2
Gpam
Gpat3
Gpatch2
Gpatch2l
Gpc5
Gpc6
Gphb5
Gpm6a
Gpn1
Gpr1
Gpr12
Gpr135
Gpr137b
Gpr141
Gpr149
Gpr150
Gpr151
Gpr158
Gpr161
Gpr21
Gpr26
Gpr27
Gpr39
Gpr6
Gpr63
Gpr65
Gpr75
Gpr89
Gprc6a
Gprin3
Gramd1b
Gramd1c
[truncated: 3,153 more rows]

## Sheet: DMG_CLDN6LowVsHigh_APSD
0610010F05Rik
1110017D15Rik
1110032F04Rik
1110051M20Rik
1190002N15Rik
1500009L16Rik
1700001J03Rik
1700007G11Rik
1700009N14Rik
1700010I14Rik
1700012A03Rik
1700012B07Rik
1700013F07Rik
1700015F17Rik
1700016C15Rik
1700016K19Rik
1700017N19Rik
1700018B08Rik
1700018F24Rik
1700020N01Rik
1700021F07Rik
1700029H14Rik
1700040L02Rik
1700056E22Rik
1700066M21Rik
1700113H08Rik
1700123L14Rik
1700129C05Rik
1810011H11Rik
1810013L24Rik
1810046K07Rik
2010107G23Rik
2010109I03Rik
2010315B03Rik
2410141K09Rik
2510009E07Rik
2610001J05Rik
2610301B20Rik
2700062C07Rik
3110018I06Rik
3110043O21Rik
4921530L21Rik
4921539E11Rik
4930402F06Rik
4930404H24Rik
4930407I10Rik
4930432M17Rik
4930447A16Rik
4930447C04Rik
4930452B06Rik
4930453N24Rik
4930467E23Rik
4930505A04Rik
4930523C07Rik
4930544G11Rik
4930546C10Rik
4930555G01Rik
4930558K02Rik
4930564D02Rik
4930572O03Rik
4930579G24Rik
4930583I09Rik
4930596D02Rik
4931408C20Rik
4931417E11Rik
4931429L15Rik
4931440F15Rik
4932411N23Rik
4933402D24Rik
4933402J07Rik
4933402N03Rik
4933405O20Rik
4933412E24Rik
4933428G20Rik
5330417C22Rik
5430419D17Rik
5530400C23Rik
5530401A14Rik
5730409E04Rik
5730480H06Rik
5730507C01Rik
5730508B09Rik
5730522E02Rik
6430573F11Rik
6720489N17Rik
8030423J24Rik
9130204L05Rik
9230102O04Rik
9230109A22Rik
9330182L06Rik
9330182O14Rik
9530002B09Rik
9530068E07Rik
9530077C05Rik
9630041A04Rik
9830107B12Rik
A130051J06Rik
A1bg
A1cf
A230072I06Rik
A26c2
A330070K13Rik
A3galt2
A430005L14Rik
A4galt
A530032D15Rik
A630001G21Rik
A830010M20Rik
A830018L16Rik
A930002H24Rik
A930009A15Rik
A930033H14Rik
AA986860
Aak1
Aasdh
Aasdhppt
Abca1
Abca13
Abca4
Abca5
Abca8b
Abcb1a
Abcb1b
Abcc12
Abcc2
Abcd4
Abcf3
Abcg2
Abcg3
Abhd2
Abhd8
Abi2
Ablim3
Abra
Abt1
Abtb1
Acaca
Acacb
Acadsb
Acbd6
Acbd7
Accsl
Acer3
Acmsd
Aco1
Acot12
Acsl1
Acsm4
Acss3
Actb
Actbl2
Actl7b
Actr10
Actr3
Actrt2
Actrt3
Acvr1
Acvr2a
Adam2
Adam23
Adam24
Adam29
Adam32
Adam34
Adam6a
Adam6b
Adamts1
Adamts12
Adamts17
Adamts18
Adamts20
Adamts3
Adamts5
Adamts6
Adamts8
Adamts9
Adamtsl1
Adamtsl5
Adarb1
Adarb2
Adcy1
Adcy2
Adcy5
Adcy7
Adcy8
Adcyap1
Add3
Adgb
Adgra3
Adgrb1
Adgrb3
Adgrd1
Adgre1
Adgre4
Adgrf5
Adgrg6
Adgrl1
Adgrl2
Adgrl3
Adgrl4
Adgrv1
Adnp2
Ado
Adra1a
Adra1b
Adra2a
Adra2c
Adsl
Adss
Aebp1
Aen
AF366264
AF529169
Afap1
Afdn
Aff1
Aff3
Afg1l
Aga
Agap1
Agbl1
Agbl3
Agbl4
Agfg1
Agmo
Agpat4
Agps
Agr3
Agtr1b
Ahctf1
Ahcyl2
Ahdc1
Ahi1
Ahr
AI314180
AI593442
Aig1
Aipl1
Ajap1
Ak4
Akain1
Akap1
Akap10
Akap13
Akap2
Akap7
Akirin2
Akr1b8
Akr1c6
Akr1d1
Akr1e1
Akt2
Akt3
Aktip
Alad
Alb
Alcam
Aldh1a3
Aldh1a7
Aldh1b1
Aldh3a2
Aldh8a1
Aldoart2
Alg10b
Alk
Alkal1
Alkal2
Alkbh8
Alms1
Alox12
Alox5ap
Alpk2
Alx1
Alx3
Amd1
Amd2
Amer2
Amer3
Amigo1
Amn1
Amph
Amy2a5
Anapc15-ps
Anapc4
Angptl2
Angptl4
Ank1
Ank2
Ank3
Ankdd1b
Ankfn1
Ankmy1
Ankrd1
Ankrd16
Ankrd28
Ankrd33b
Ankrd50
Ankrd55
Ankrd6
Ankrd7
Anks1b
Ano1
Ano10
Ano2
Ano4
Ano5
Antxr1
Anxa1
Anxa10
Anxa3
Anxa4
Aoah
Ap3b1
Ap4e1
Apba2
Apbb1ip
Apbb2
Apc
Api5
Apip
Apmap
Apob
Apol7a
Apol7b
Apol7e
App
Appl2
Aptx
Aqp2
Arfgef1
Arfgef3
Arg2
Arglu1
Arhgap10
Arhgap12
Arhgap15
Arhgap18
Arhgap20
Arhgap21
Arhgap23
Arhgap24
Arhgap26
Arhgap29
Arhgap32
Arhgap35
Arhgap40
Arhgap42
Arhgap5
Arhgap8
Arhgef26
Arhgef3
Arhgef38
Arhgef7
Arid1b
Arid2
Arl15
Arl4a
Arl5b
Arl6
Arl6ip6
Armc1
Armc2
Armc3
Armc4
Arnt2
Arpp21
Arrdc3
Arrdc4
Arsj
Art2b
Artn
Asah2
Asap1
Asap2
Asb1
Asb17
Asb18
Asb4
Ascc3
Ascl1
Asic2
Asphd2
Asrgl1
Ass1
Astn1
Astn2
Asxl3
Atad2b
Atad3a
Atf1
Atg10
Atg4c
Atg5
Atg7
Atoh1
Atoh7
Atoh8
Atp10a
Atp11b
Atp13a4
Atp13a5
Atp1a1
Atp1a3
Atp1b1
Atp1b3
Atp23
Atp2a2
Atp2b1
Atp2b2
Atp6ap1l
Atp6v0a1
Atp6v1g2
Atp6v1g3
Atp8a1
Atp8b5
Atrn
Atxn1
Atxn2l
Atxn3
Atxn7l3b
Auh
Auts2
Aven
Avpr1a
Avpr1b
AW554918
AW822073
Axin2
Azi2
Azin1
B020004J07Rik
B3galt1
B3galt2
B3galt5
B3gat1
B3gat2
B3glct
B3gnt2
B430305J03Rik
B4galnt2
B4galt5
B4galt6
B9d1
Babam2
Bace2
Bach1
Bach2
Baiap2
Bambi
Bank1
Barhl1
Barhl2
Barx2
Basp1
Baz1a
Baz2b
Bbox1
Bbs10
Bbs9
Bbx
BC005561
BC030500
BC048507
BC051142
BC052040
BC067074
Bcas1
Bcas3
Bcat1
Bckdhb
Bcl11a
Bcl2a1c
Bcl2l1
Bcl2l11
Bcl2l14
Bcl6
Bdh1
Begain
Bend5
Bet1
Bhlha9
Bhlhe22
Bhlhe23
Blcap
Blk
Bmp2
Bmp2k
Bmp3
Bmp5
Bmp6
Bmp7
Bmp8a
Bmper
Bmpr1b
Bnc2
Boc
Bod1l
Borcs5
Bpifa2
Bpifa3
Bpifb9a
Bptf
Brdt
Brinp1
Brinp3
Brms1
Brms1l
Brpf3
Brsk2
Brwd1
Btbd11
Btbd3
Btbd35f11
Btbd35f27
Btbd9
Btc
Btg1
Bub3
Bzw1
C030005K15Rik
C130026I21Rik
C130060K24Rik
C1ql2
C1ql3
C1qtnf3
C2cd5
C330018D20Rik
C4b
C4bp
C6
C7
Cabp2
Cachd1
Cacna1c
Cacna1e
Cacna1i
Cacna2d1
Cacna2d3
Cacna2d4
Cacnb2
Cacnb4
Cacng2
Cacng4
Cacybp
Cadm1
Cadm2
Cadps
Calb1
Calcoco1
Calcr
Calcrl
Cald1
Calhm1
Calm1
Calm2
Calm3
Calml3
Camk1d
Camk1g
Camk2d
Camk2n1
Camkmt
Camta1
Cand1
Capn10
Capn13
Capn9
Car1
Car10
Car8
Card11
Cars2
Cartpt
Casd1
Casp14
Catsper1
Catsperb
Catsperg2
Cavin2
Cavin4
Cbfa2t3
Cblb
Cbll1
Cbln1
Cbln2
Cbln4
Ccbe1
Ccdc105
Ccdc112
Ccdc115
Ccdc136
Ccdc138
Ccdc14
Ccdc144b
Ccdc149
Ccdc155
Ccdc173
Ccdc175
Ccdc178
Ccdc180
Ccdc182
Ccdc187
Ccdc191
Ccdc3
Ccdc39
Ccdc50
Ccdc54
Ccdc6
Ccdc60
Ccdc63
Ccdc68
Ccdc71l
Ccdc81
Ccdc83
Ccdc85a
Ccdc90b
Ccdc93
Ccin
Cck
Ccl1
Ccl24
Ccna1
Ccnd1
Ccnd2
Ccnd3
Ccnj
Ccnl1
Ccnt2
Ccr1
Ccr7
Ccser1
Ccser2
Cct4
Cct6b
Cd109
Cd163
Cd180
Cd226
Cd244
Cd300e
Cd34
Cd3e
Cd44
Cd47
Cd48
Cd55
Cd55b
Cd7
Cd82
Cd83
Cd84
Cd93
Cd96
Cdc23
Cdc37l1
Cdc42ep4
Cdc42se2
Cdc5l
Cdca2
Cdca7l
Cdh10
Cdh11
Cdh12
Cdh13
Cdh15
Cdh18
Cdh19
Cdh2
Cdh20
Cdh23
Cdh26
Cdh4
Cdh5
Cdh6
Cdh7
Cdh8
Cdh9
Cdhr2
Cdk1
Cdk17
Cdk18
Cdk19
Cdk5r1
Cdk5r2
Cdk5rap2
Cdk8
Cdkal1
Cdkl3
Cdkl4
Cdkn2a
Cdkn2aip
Cdkn2aipnl
Cdkn2b
Cdkn2c
Cdyl
Cdyl2
Ceacam1
Ceacam18
Cebpd
Celf2
Celf4
Cenpc1
Cenpe
Cenpf
Cenpj
Cenpv
Cenpw
Cep135
Cep152
Cep162
Cep170
Cep70
Cep78
Cept1
Cers6
Ces2a
Ces3b
Ces5a
Cetn3
Cfap161
Cfap36
Cfap44
Cfap45
Cfap53
Cfap58
Cfap77
Cga
Cggbp1
Cgn
Ch25h
Chac1
Chchd1
Chd1
Chd1l
Chd3os
Chd6
Chd7
Chdh
Chia1
Chic2
Chil3
Chil4
Chit1
Chl1
Chodl
Chordc1
Chp2
Chrac1
Chrm2
Chrm3
Chrna4
Chst1
Chst2
Chst4
Chst8
Chst9
Churc1
Cit
Cited2
CK137956
Ckap2l
Clca3a2
Clcn4
Cldn5
Clec14a
Clec3a
Clec4a3
Clec4a4
Clec9a
Clic5
Clint1
Clip4
Cln8
Clnk
Clock
Clspn
Clstn2
Clvs1
Cmah
Cmc1
Cmpk2
Cmya5
Cnbd1
Cnga3
Cnih2
Cnmd
Cnnm2
Cnot6l
Cnrip1
Cntn2
Cntn3
Cntn4
Cntn5
Cntn6
Cntnap2
Cntnap3
Cntnap4
Cntnap5a
Cntnap5b
Cobl
Cobll1
Cog2
Cog6
Cog7
Col11a1
Col12a1
Col13a1
Col19a1
Col1a2
Col22a1
Col23a1
Col25a1
Col26a1
Col4a3
Col4a4
Col6a1
Col6a4
Col9a1
Colgalt2
Commd10
Commd8
Commd9
Cops8
Copz1
Coq3
Corin
Coro2a
Cox18
Cox4i2
Cox6a1
Cox7a2l
Cox7c
Cp
Cpa1
Cpa6
Cpeb1
Cpeb2
Cpeb3
Cped1
Cplx2
Cpm
Cpn2
Cpne8
Cpsf6
Cpxm1
Cradd
Crb2
Crebbp
Crhr1
Crhr2
Crim1
Crispld1
Crispld2
Crlf2
Crmp1
Crnn
Crp
Crxos
Cry1
Cryba4
Crygf
Cryl1
Csf1r
Csf2
Csf3r
Csl
Csmd1
Csmd3
Csnk1a1
Csnk1g3
Csnka2ip
Cspg4
Cst10
Cstf2t
Ctbp2
Ctdspl
Ctgf
Ctla4
Ctnna1
Ctnna2
Ctnna3
Ctnnb1
Ctnnbl1
Ctnnd2
Ctrb1
Ctsf
Ctsj
Ctso
Ctsq
Ctss
Cubn
Cul1
Cul3
Cux1
Cuzd1
Cwc22
Cwc27
Cx3cr1
Cxadr
Cxcl10
Cxcl12
Cxcl13
Cxcr4
Cxxc4
Cyb561
Cyb5a
Cybrd1
Cylc2
Cyp17a1
Cyp19a1
Cyp1b1
Cyp24a1
Cyp26b1
Cyp2a22
Cyp2b19
Cyp2d26
Cyp2d9
Cyp2t4
Cyp3a11
Cyp3a16
Cyp3a25
Cyp3a41a
Cyp3a41b
Cyp3a44
Cyp3a57
Cyp46a1
Cyp4f37
Cyp4f39
Cyp51
Cyp7b1
Cypt4
Cyr61
Cysltr2
Cyth1
Cyth3
Cyyr1
D130052B06Rik
D1Ertd622e
D1Pas1
D3Ertd751e
D430041D05Rik
D430042O09Rik
D630003M21Rik
D630036H23Rik
D630045J12Rik
D7Ertd443e
Daam1
Daam2
Dab1
Dab2
Dach1
Dact2
Dad1
Dap
Dapk1
Dapp1
Dars
Dazl
Dbn1
Dbx1
Dcaf5
Dcc
Dcdc2a
Dchs1
Dchs2
Dclk1
Dcn
Dcp1b
Dcp2
Dcstamp
Ddah1
Ddc
Ddhd1
Ddr1
Ddx10
Ddx18
Ddx20
Ddx52
Ddx60
Dedd2
Defb28
Defb3
Defb33
Defb41
Degs2
Dennd1a
Dennd2a
Depdc1a
Depdc1b
Desi2
Dexi
Dfna5
Dgka
Dgkb
Dgkg
Dgki
Dgkz
Dhh
Dhrs13
Dhrs2
Dhrs3
Dhrs4
Dhrs9
Dhx15
Dhx35
Diaph1
Diaph3
Diexf
Dio2
Dio3
Dip2a
Dip2c
Diras2
Dis3
Dis3l2
Disc1
Disp1
Dkk1
Dkk2
Dlc1
Dld
Dleu7
Dlg2
Dlg4
Dlgap1
Dlgap2
Dlk1
Dlk2
Dll1
Dlst
Dlx2
Dlx4
Dlx6
Dmap1
Dmbt1
Dmbx1
Dmc1
Dmp1
Dmrt2
Dmrta1
Dmrta2
Dmrtb1
Dnah12
Dnah2
Dnah5
Dnah6
Dnah7a
Dnah7b
Dnah8
Dnah9
Dnaic2
Dnaja2
Dnajb6
Dnajb8
Dnajb9
Dnajc1
Dnajc10
Dnajc13
Dnajc19
Dnase2a
Dnm3
Dnmt3a
Dnph1
Doc2b
Dock1
Dock2
Dock7
Dock8
Dok6
Donson
Dopey2
Dpf3
Dph6
Dpp10
Dppa3
Dpy19l1
Dpy19l2
Dpyd
Dr1
Drc3
Drd1
Drd2
Drosha
Dsc1
Dsc3
Dscam
Dse
Dsel
Dtna
Dtnb
Dtnbp1
Dtwd2
Dupd1
Dusp10
Dusp15
Dusp22
Dusp23
Dusp26
Dusp4
Dusp5
Dusp6
Dync1i1
Dync1li2
Dynll1
Dynlrb2
Dynlt1b
Dynlt1c
Dyrk1a
Dyrk2
Dyrk4
Dysf
E2f7
E2f8
E330034G19Rik
Ebag9
Ebf1
Ebf2
Ebf3
Eci2
Ecm2
Ect2
Ect2l
Edem1
Edem3
Edil3
Edn1
Edn2
Edn3
Ednra
Ednrb
Eea1
Eef1g
Eef2k
Eef2kmt
Eefsec
Eepd1
Efcab11
Efcab3
Efcab8
Efcc1
Efhb
Efna1
Efna5
Efnb2
Efr3a
Egf
Egfem1
Egflam
Egr2
Ehd1
Ehf
Ehhadh
Eif2ak2
Eif3h
Eif3m
Eif4ebp1
Eif4g2
Elavl2
Elavl4
Elf2
Elfn2
Ell2
Elmo1
Eln
Elp3
Emb
Emcn
Emid1
Eml6
Emp1
Enc1
Endov
Engase
Enkur
Eno1b
Enox1
Enpep
Enpp2
Enpp6
Enpp7
ENSMUSG00000109903
ENSMUSG00000112187
Enthd1
Entpd1
Eogt
Eomes
Epas1
Epb41l2
Epb41l3
Epb41l4a
Epb41l4b
Epc2
Epha4
Epha5
Epha6
Epha7
Epha8
Ephb2
Ephb3
Epm2a
Eps15l1
Eps8
Eral1
Erap1
Erbb4
Erbin
Erc1
Erc2
Ercc4
Erg
Ergic2
Eri3
Erich3
Erich6b
Erv3
Esco2
Esd
Esp31
Esp34
Esp38
Esr1
Etaa1
Etd
Etl4
Etnk1
Ets1
Ets2
Etv1
Etv5
Etv6
Evc2
Evl
Evx1
Exoc4
Exoc6b
Ext1
Eya4
Ezh2
Ezr
F13a1
F2rl3
F5
Fa2h
Faf1
Fahd2a
Fam107b
Fam110b
Fam110c
Fam118a
Fam120a
Fam120b
Fam122a
Fam124b
Fam133b
Fam135b
Fam155a
Fam159a
Fam159b
Fam169b
Fam171b
Fam172a
Fam173b
Fam174b
Fam181b
Fam184a
Fam189a1
Fam196b
Fam198b
Fam19a2
Fam19a4
Fam19a5
Fam210b
Fam214a
Fam228a
Fam26f
Fam3c
Fam43a
Fam43b
Fam46c
Fam49a
Fam53b
Fam60a
Fam69a
Fam71e1
Fam76b
Fam78b
Fam84a
Fam84b
Fam92a
Fam92b
Fam96b
Fam98a
Fank1
Far1
Far2
Farsb
Fas
Fasl
Fat1
Fat3
Fat4
Faxc
Fbl
Fbp1
Fbxl17
Fbxo33
Fbxo38
Fbxo4
Fbxo48
Fbxw15
Fbxw4
Fbxw7
Fcgr1
Fcnb
Fdx1
Fer1l6
Ferd3l
Fermt1
Fez1
Fezf1
Fezf2
Fgd4
Fgf1
Fgf10
Fgf12
Fgf14
Fgf18
Fgf6
Fgf7
Fgf9
Fgfr1
Fgfr2
Fggy
Fgl2
Fhit
Fhl2
Fhod3
Fig4
Fign
Fignl2
Filip1l
Fip1l1
Fkbp6
Fktn
Fli1
Flnb
Flrt2
Flrt3
Flt1
Fmc1
Fmn1
Fmnl3
Fmo9
Fmod
Fn1
Fndc1
Fndc3b
Fndc5
Fnip2
Focad
Fos
Foxa1
Foxa2
Foxb1
Foxc1
Foxd1
Foxd3
Foxf1
Foxf2
Foxg1
Foxj2
Foxk1
Foxl1
Foxn2
Foxn3
Foxo1
Foxo3
Foxo6
Foxp1
Foxp2
Fras1
Frem2
Frem3
Frg1
Frk
Frmd4a
Frmd4b
Frmd5
Frmd6
Frrs1
Frs2
Fry
Frzb
Fsbp
Fscb
Fshr
Fsip2
Fstl4
Fstl5
Fth1
Ftmt
Fto
Fuca2
Fut8
Fut9
Fxn
Fxr1
Fyb
Fyb2
Fzd1
Fzd10
Fzd3
Fzd5
Fzd7
Fzd8
Fzd9
G6pd2
Gab1
Gabbr2
Gabra1
Gabra2
Gabra4
Gabrb1
Gabrb2
Gabrb3
Gabrg1
Gabrg3
Gabrr1
Gad1
Gadd45g
Gadl1
Galc
Galk1
Galm
Galnt10
Galnt13
Galnt14
Galnt18
Galnt2
Galnt5
Galnt7
Galnt9
Galntl6
Galr1
Galr3
Gap43
Garem1
Gas1
Gas2l3
Gas7
Gata2
Gata3
Gata4
Gatb
Gatsl2
Gbe1
Gbp2
Gbp5
Gbx2
Gc
Gcfc2
Gclc
Gcnt2
Gda
Gdf6
Gdi2
Gdnf
Gdpd4
Gem
Gfod1
Gfra1
Gfra2
Ggact
Ggh
Ggt7
Ggta1
Ghitm
Gimd1
Gin1
Ginm1
Gins3
Gja1
Gjb3
Gjb5
Gjd2
Gk2
Gkap1
Glcci1
Gli2
Gli3
Glo1
Glod4
Glp1r
Glra1
Glrx3
Glrx5
Gls
Glt1d1
Glyctk
Gm10020
Gm10036
Gm10097
Gm10110
Gm10118
Gm10139
Gm10184
Gm10192
Gm10217
Gm10234
Gm10260
Gm10267
Gm10277
Gm10283
Gm10295
Gm10306
Gm10309
Gm10324
Gm10330
Gm10338
Gm10354
Gm10406
Gm10428
Gm1043
Gm10436
Gm10471
Gm10479
Gm10717
Gm10719
Gm10720
Gm10721
Gm10750
Gm10767
Gm10772
Gm10800
Gm10801
Gm10945
Gm10974
Gm10999
Gm11077
Gm11084
Gm11099
Gm11127
Gm11146
Gm11168
Gm11214
Gm11232
Gm11239
Gm11639
Gm11733
Gm12695
Gm12728
Gm12789
Gm12830
Gm12886
Gm12887
Gm12888
Gm13090
Gm13212
Gm13691
Gm14085
Gm14180
Gm14444
Gm14496
Gm15217
Gm15292
Gm15319
Gm1604b
Gm16223
Gm16432
Gm16494
Gm16503
Gm16519
Gm17087
Gm17430
Gm17455
Gm17535
Gm1758
Gm17732
Gm1979
Gm2016
Gm21293
Gm21370
Gm21738
Gm21949
Gm2310
Gm2381
Gm27027
Gm29106
Gm3115
Gm3127
Gm3424
Gm3453
Gm3476
Gm3486
Gm35911
Gm3604
Gm3642
Gm37013
Gm37240
Gm3727
Gm4027
Gm4340
Gm43517
Gm45871
Gm4791
Gm4861
Gm4881
Gm4894
Gm4950
Gm5096
Gm5113
Gm5114
Gm5136
Gm5415
Gm5426
Gm5431
Gm5447
Gm5458
Gm5580
Gm5591
Gm5592
Gm5662
Gm572
Gm5773
Gm5849
Gm5861
Gm5926
Gm597
Gm6133
Gm6576
Gm6594
Gm6657
Gm6793
Gm7030
Gm7075
Gm7275
Gm7298
Gm7347
Gm7356
Gm7489
Gm765
Gm8094
Gm8127
Gm8251
Gm826
Gm8332
Gm8356
Gm853
Gm8888
Gm9008
Gm9195
Gm933
Gm9602
Gm9733
Gm9747
Gm9772
Gm9844
Gm9925
Gm9972
Gmds
Gnal
Gnaq
Gnat3
Gnaz
Gne
Gng12
Gng13
Gng2
Gng7
Gnl2
Gnpda2
Gnpnat1
Gnrh1
Gns
Golga7b
Golph3
Gorab
Gosr2
Got2
Gp2
Gp6
Gpalpp1
Gpam
Gpatch2l
Gpc5
Gpc6
Gpd2
Gphb5
Gpr137b
Gpr141
Gpr149
Gpr151
Gpr155
Gpr156
Gpr158
Gpr26
Gpr37
Gpr61
Gprin3
Gpt2
Gpx5
Gramd1a
Gramd1b
Gramd1c
Gramd3
Grap
Grb10
Grb2
Grem2
Grhl2
Gria1
Gria4
Grid1
Grid2
Grik1
Grik2
Grik3
Grik4
Grin2a
Grin2b
Grin3a
Grip1
Grk4
Grm1
Grm3
Grm4
Grm7
Grm8
Grrp1
Grsf1
Grxcr1
Gsc
Gsdmc
Gsg1l
Gspt1
Gstm7
Gtdc1
Gtf2a1
Gtf3a
Gtpbp10
Gtpbp4
Gucd1
Gucy1a3
Gucy2e
Gulp1
Gxylt1
Gyg
Gypc
H2-Aa
H2afy2
H2al2a
H2-D1
H2-M9
H2-Oa
H2-Q1
H2-Q6
H2-Q7
H60b
H60c
Habp2
Hacd1
Hacd2
Hace1
Hand1
Hand2
Hao1
Hapln1
Hapln2
Has2
Hc
Hcn1
Hdac2
Hdac4
Hdac7
Hddc2
Hdgfl1
Hdhd3
Hdhd5
Hebp2
Hectd1
Hectd2
Hecw1
Hecw2
Helb
Helz
Hephl1
Herc1
Hes1
Hexb
Hey1
Hey2
Hfm1
Hgf
Hhex
Hhip
Hhipl1
Hhipl2
Hhla1
Hibadh
Hic1
Higd1b
Hip1
Hira
Hivep1
Hivep3
Hjurp
Hlx
Hmcn1
Hmcn2
Hmg20a
Hmg20b
Hmga2
Hmgb1
Hmgb4
Hmgcll1
Hmgcs1
Hmgn3
Hmx1
Hnf4g
Hnmt
Hnrnpa3
Hnrnpll
Homer2
Homer3
Hopx
Hoxa13
Hoxa2
Hoxa9
Hoxb1
Hoxb13
Hoxc11
Hoxc12
Hoxc13
Hoxc4
Hpcal1
Hps1
Hpse2
Hrasls5
Hrh1
Hrh2
Hrh4
Hs3st1
Hs3st2
Hs3st3a1
Hs3st3b1
Hs3st4
Hs3st5
Hs6st1
Hs6st3
Hsbp1
Hsd11b1
Hsd3b6
Hsf2
Hsf2bp
Hsfy2
Hsp90b1
Hspa13
Hspa4
Hspa4l
Hspb8
Htr1a
Htr1b
Htr1f
Htr2a
Htr5b
Htr7
Hydin
Ica1
Ice1
Ice2
Id1
Id2
Id4
Ier2
Ier5
Iffo2
Ifi203
Ifit1bl1
Ifit3
Ifit3b
Ifnb1
Ifng
Ifnk
Ifnlr1
Ift57
Igbp1b
Igf1
Igf2r
Igfbp2
Igfbp3
Igfbp4
Igfbp7
Igsf11
Igsf21
Igsf5
Ikzf2
Il10
Il10ra
Il12a
Il12b
Il12rb2
Il1b
Il1f10
Il1r2
Il1rl1
Il20rb
Il6
Il6st
Il7
Ilf3
Impad1
Impg1
Inhba
Inhbb
Ino80d
Inpp1
Inpp4a
Inpp5a
Ins1
Ins2
Insc
Insig1
Insm1
Insr
Insrr
Intu
Invs
Ipcef1
Ipmk
Ipo11
Ipo8
Ipp
Iqcf3
Iqcf4
Iqch
Iqcj
Iqcm
Iqsec3
Iqub
Irak1bp1
Irak3
Ireb2
Irf2
Irf2bp2
Irf2bpl
Irf8
Irgq
Irs2
Irx1
Irx2
Irx4
Irx5
Isca2
Isg20
Isl1
Isl2
Isx
Itga1
Itga11
Itga2
Itga4
Itga6
Itga8
Itga9
Itgad
Itgal
Itgb1
Itgb8
Itgbl1
Itih5
Itk
Itln1
Itpk1
Itpkb
Itpr1
Itpr2
Itpripl1
Iyd
Izumo1r
Jade1
Jag1
Jak1
Jakmip1
Jakmip3
Jam3
Jazf1
Jcad
Jdp2
Jmy
Jph1
Jph2
Jph4
Jrkl
Jun
Kalrn
Kank1
Kap
Kat2b
Katnal1
Kazn
[truncated: 2,398 more rows]

## Sheet: DMG_CLDN6High_EpiSCvsAPSD
0610009B22Rik
0610010F05Rik
0610040J01Rik
1110004F10Rik
1110017D15Rik
1110032F04Rik
1110059E24Rik
1190002N15Rik
1500009L16Rik
1600014C23Rik
1700001K19Rik
1700001O22Rik
1700003H04Rik
1700007G11Rik
1700008O03Rik
1700008P02Rik
1700009N14Rik
1700010I14Rik
1700011I03Rik
1700011L22Rik
1700012A03Rik
1700013F07Rik
1700015F17Rik
1700016C15Rik
1700016D06Rik
1700017D01Rik
1700017N19Rik
1700018F24Rik
1700019N19Rik
1700020N01Rik
1700021F07Rik
1700024G13Rik
1700029H14Rik
1700040L02Rik
1700056E22Rik
1700093K21Rik
1700113H08Rik
1700123K08Rik
1700123L14Rik
1700129C05Rik
1810011H11Rik
1810011O10Rik
1810013L24Rik
1810046K07Rik
1810055G02Rik
2010107G23Rik
2010300C02Rik
2300009A05Rik
2310009B15Rik
2310057J18Rik
2410089E03Rik
2410131K14Rik
2410141K09Rik
2510009E07Rik
2610001J05Rik
2700060E02Rik
2700062C07Rik
2810474O19Rik
2900026A02Rik
3100002H09Rik
3110018I06Rik
3110043O21Rik
3425401B19Rik
3830403N18Rik
4921509C19Rik
4921530L21Rik
4930433I11Rik
4930447A16Rik
4930447C04Rik
4930452B06Rik
4930453N24Rik
4930467E23Rik
4930474N05Rik
4930505A04Rik
4930512M02Rik
4930522L14Rik
4930523C07Rik
4930524B15Rik
4930544G11Rik
4930546C10Rik
4930558K02Rik
4930562C15Rik
4930564D02Rik
4930572O03Rik
4930579G24Rik
4930583I09Rik
4930596D02Rik
4931408C20Rik
4931417E11Rik
4931423N10Rik
4932411N23Rik
4933402D24Rik
4933402J07Rik
4933402N03Rik
4933405L10Rik
4933405O20Rik
4933412E24Rik
4933415F23Rik
4933416C03Rik
4933428G20Rik
5330417C22Rik
5530400C23Rik
5530401A14Rik
5730409E04Rik
5730480H06Rik
5730507C01Rik
5730508B09Rik
5730522E02Rik
6030452D12Rik
6030468B19Rik
6430548M08Rik
8030423J24Rik
9130204L05Rik
9130409I23Rik
9230109A22Rik
9230113P08Rik
9330159F19Rik
9330182L06Rik
9330182O14Rik
9530002B09Rik
9530053A07Rik
9530068E07Rik
9630041A04Rik
9830107B12Rik
A130051J06Rik
A1bg
A230072I06Rik
A26c2
A2m
A330070K13Rik
A430005L14Rik
A4galt
A530032D15Rik
A530064D06Rik
A530084C06Rik
A630001G21Rik
A630010A05Rik
A630095E13Rik
A730049H05Rik
A830018L16Rik
A930002H24Rik
A930009A15Rik
A930018P22Rik
A930033H14Rik
AA467197
Aard
Aars
Aasdh
Aasdhppt
Aass
Abca1
Abca12
Abca13
Abca15
Abca17
Abca9
Abcb11
Abcb1b
Abcb4
Abcb9
Abcc10
Abcc12
Abcc4
Abcd2
Abcd3
Abcd4
Abcf2
Abcg1
Abcg2
Abcg8
Abhd12b
Abhd5
Abi2
Abi3bp
Ablim3
Abra
Abt1
Acaa2
Acaca
Acad11
Acan
Acbd7
Accsl
Acer1
Acer2
Ackr3
Acmsd
Aco1
Acr
Acsbg1
Acsf3
Acsl1
Acsl5
Acsm1
Acss1
Acta2
Actbl2
Actc1
Actl7b
Actn1
Actn2
Actn4
Actr10
Actr3
Actr3b
Actr6
Actrt3
Acvr1
Acvr1b
Acvr2a
Acyp2
Adam21
Adam23
Adam24
Adam29
Adam34
Adam5
Adam6a
Adam6b
Adam7
Adamts15
Adamts17
Adamts2
Adamts20
Adamts5
Adamts6
Adamts9
Adamtsl1
Adamtsl3
Adamtsl5
Adar
Adarb1
Adarb2
Adcy1
Adcy2
Adcy5
Adcy8
Adcyap1
Adgb
Adgra1
Adgra3
Adgrb3
Adgrd1
Adgre1
Adgre4
Adgrf5
Adgrg1
Adgrg6
Adgrl1
Adgrl2
Adgrl3
Adgrl4
Adk
Ado
Adora2a
Adora3
Adpgk
Adra1a
Adra1b
Adra1d
Adra2a
Adra2b
Adrb1
Adrb3
Adss
Adtrp
Aen
AF366264
AF529169
Afap1
Afap1l1
Afap1l2
Afdn
Aff3
Aftph
Aga
Agap1
Agbl1
Agbl4
Aggf1
Agmo
Ago2
Agpat4
Agpat5
Agps
Agr3
Agtpbp1
Agtr1b
Agxt2
Ahdc1
Ahi1
Ahr
AI429214
AI593442
AI606181
Aifm3
Aig1
Aipl1
Ajap1
Ak4
Ak5
Ak9
Akain1
Akap1
Akap13
Akap7
Akirin2
Akr1b3
Akr1c21
Akr1d1
Akt3
Alad
Alb
Alcam
Aldh1a2
Aldh1a3
Aldh1b1
Aldh1l2
Aldh2
Aldh3a2
Aldh8a1
Aldh9a1
Alg10b
Alk
Alox12
Alox12e
Alpk2
Alpl
Alx1
Ambra1
Amd2
Amer2
Amer3
Ampd3
Amy2a5
Anapc13
Anapc15-ps
Angpt2
Angptl3
Angptl4
Ank
Ank2
Ank3
Ankef1
Ankfn1
Ankhd1
Ankrd1
Ankrd28
Ankrd33b
Ankrd34c
Ankrd44
Ankrd50
Ankrd55
Anks1b
Ano1
Ano2
Ano3
Ano4
Ano5
Anpep
Antxr1
Antxr2
Anxa1
Anxa10
Anxa2
Anxa3
Anxa5
Aoah
Aox3
Ap1g1
Ap3b1
Apaf1
Apba1
Apba2
Apba3
Apbb1ip
Apc
Apcs
Aph1b
Aph1c
Api5
Apip
Aplnr
Apob
Apol7b
Apol7e
App
Appl2
Aqp11
Aqp4
Aqp7
Aqp9
Arap2
Areg
Arfgef1
Arg2
Arglu1
Arhgap15
Arhgap19
Arhgap20
Arhgap21
Arhgap22
Arhgap23
Arhgap24
Arhgap26
Arhgap29
Arhgap35
Arhgap39
Arhgap42
Arhgap5
Arhgef15
Arhgef16
Arhgef2
Arhgef26
Arhgef28
Arid1a
Arid1b
Arid4b
Arid5b
Arl15
Arl4a
Arl4c
Arl5a
Arl5b
Arl6
Arl6ip6
Armc1
Armc2
Armc3
Arnt2
Arntl
Arpc5
Arpp21
Arrb1
Arrdc3
Arrdc4
Arsb
Arsj
Art2b
Asah2
Asap1
Asap2
Asb1
Asb14
Asb4
Asb7
Ascc3
Ascl1
Ascl2
Asgr1
Asic2
Asmt
Asnsd1
Asphd1
Ass1
Astn1
Astn2
Asxl3
Atad2b
Atf2
Atf7ip
Atg10
Atg101
Atg16l2
Atg2a
Atg4a-ps
Atg4c
Atg5
Atg7
Atic
Atl1
Atl2
Atoh1
Atoh8
Atp10a
Atp11b
Atp12a
Atp13a3
Atp13a4
Atp1a3
Atp1b2
Atp23
Atp2a2
Atp2b1
Atp2b2
Atp2c2
Atp5g3
Atp5j
Atp5o
Atp6ap1l
Atp6v0d2
Atp6v1f
Atp6v1g3
Atp6v1h
Atp8a2
Atp8b3
Atp8b5
Atrn
Atrnl1
Atxn1
Atxn2
Atxn7l3b
AU018091
Auh
Auts2
Aven
Avpr1a
AW209491
AW554918
AW822073
Axin2
Azi2
Azin1
B020004C17Rik
B3galnt2
B3galt1
B3galt2
B3galt5
B3gat1
B3gat2
B3gnt2
B430305J03Rik
B4galnt2
B4galt6
Babam2
Bach1
Bach2
Baiap2l1
Bank1
Bap1
Barhl1
Barhl2
Barx1
Barx2
Basp1
Baz1a
Baz2b
Bbs10
Bbs9
Bbx
BC005561
BC029722
BC030500
BC030870
BC034090
BC048403
BC048507
BC052040
BC067074
BC107364
Bcar1
Bcat1
Bcdin3d
Bche
Bckdhb
Bcl10
Bcl11a
Bcl11b
Bcl2
Bcl2a1c
Bcl2l10
Bcl2l11
Bcl2l14
Bcl6
Bdh1
Bdh2
Bdnf
Begain
Bend3
Bend5
Bet1
Bfsp1
Bhlha9
Bhlhe22
Bhlhe23
Bicc1
Bicd1
Bicd2
Blm
Bloc1s1
Bloc1s4
Bloc1s5
Bmp2
Bmp3
Bmp4
Bmp5
Bmp6
Bmp7
Bmp8a
Bmper
Bmpr1b
Bnc1
Bnc2
Bnip3l
Boc
Bod1l
Bphl
Bpifa2
Bpifa3
Bptf
Braf
Brd7
Brinp1
Brinp2
Brinp3
Brms1l
Brox
Brpf3
Bsx
Btbd11
Btbd16
Btbd3
Btbd35f11
Btbd35f27
Btbd35f6
Btbd9
Btc
Btd
Btg1
Btnl6
Btnl9
Btrc
Bub3
Bud13
C030005K15Rik
C130026I21Rik
C130060K24Rik
C1d
C1qb
C1ql2
C1ql3
C1ra
C1rb
C2cd4a
C2cd4b
C2cd6
C3ar1
C4b
C4bp
C6
C8a
Cabp2
Cabp7
Cachd1
Cacna1a
Cacna1c
Cacna1e
Cacna2d1
Cacna2d2
Cacna2d3
Cacna2d4
Cacnb2
Cacnb4
Cacng2
Cacng4
Cadm1
Cadm2
Cadps
Calb1
Calcoco1
Calcr
Calcrl
Calm1
Calm2
Calm3
Calm4
Caly
Camk1d
Camk1g
Camk4
Camkmt
Camta1
Cand1
Capn10
Capn13
Car10
Car15
Car8
Card11
Carf
Carmil1
Carmil2
Cartpt
Casd1
Casp12
Casz1
Catsper3
Catsperb
Catsperg2
Cav2
Cavin2
Cavin3
Cavin4
Cbfa2t3
Cbfb
Cblb
Cbll1
Cbln1
Cbln2
Cbln4
Cbr4
Cbx1
Ccbe1
Ccdc105
Ccdc112
Ccdc126
Ccdc129
Ccdc136
Ccdc138
Ccdc141
Ccdc148
Ccdc149
Ccdc15
Ccdc150
Ccdc171
Ccdc172
Ccdc178
Ccdc182
Ccdc187
Ccdc191
Ccdc28a
Ccdc3
Ccdc33
Ccdc39
Ccdc40
Ccdc42
Ccdc43
Ccdc54
Ccdc59
Ccdc6
Ccdc63
Ccdc68
Ccdc71l
Ccdc7a
Ccdc80
Ccdc85a
Ccdc88b
Ccdc90b
Ccdc91
Ccdc93
Ccdc96
Ccdc97
Cck
Ccl1
Ccl6
Ccl9
Ccna1
Ccnc
Ccnd1
Ccnd2
Ccng1
Ccng2
Ccnl1
Ccnt2
Ccny
Ccr1
Ccr7
Ccser1
Cct6b
Cd109
Cd180
Cd1d1
Cd200r3
Cd209f
Cd226
Cd244
Cd247
Cd24a
Cd2bp2
Cd300ld3
Cd36
Cd38
Cd3e
Cd40
Cd44
Cd47
Cd48
Cd55
Cd55b
Cd6
Cd74
Cd83
Cd8b1
Cd93
Cdc14a
Cdc20b
Cdc42bpa
Cdc42bpg
Cdc42ep3
Cdc42ep4
Cdc42ep5
Cdc42se2
Cdc5l
Cdc7
Cdca2
Cdca7
Cdh10
Cdh11
Cdh12
Cdh13
Cdh15
Cdh17
Cdh18
Cdh19
Cdh2
Cdh20
Cdh22
Cdh23
Cdh26
Cdh4
Cdh5
Cdh6
Cdh7
Cdh8
Cdh9
Cdhr3
Cdk1
Cdk18
Cdk5r1
Cdk5r2
Cdk5rap2
Cdk6
Cdk7
Cdk8
Cdkal1
Cdkl1
Cdkl3
Cdkl4
Cdkn2a
Cdkn2c
Cdkn3
Cdon
Cdyl
Cdyl2
Ceacam10
Ceacam2
Cebpa
Cela3b
Celf2
Celf4
Celf6
Cenpc1
Cenpe
Cenpf
Cenpo
Cenpq
Cenpv
Cenpw
Cep112
Cep120
Cep162
Cep170
Cep68
Cep83
Cep85l
Cers3
Cers6
Ces1d
Ces2a
Ces3b
Cetn3
Cfap161
Cfap36
Cfap44
Cfap54
Cfap58
Cfap70
Cfl2
Cga
Cggbp1
Cgnl1
Chac2
Chchd3
Chd3
Chd3os
Chd6
Chd7
Chd9
Chdh
Chia1
Chic2
Chil3
Chil4
Chit1
Chl1
Chmp6
Chn1
Chordc1
Chp2
Chrm1
Chrm2
Chrm3
Chrna1
Chst1
Chst11
Chst15
Chst2
Chst3
Chsy1
Chsy3
Churc1
Cidea
Ciita
Cit
Cited2
CK137956
Ckmt2
Clasp2
Cldn10
Cldn13
Cldn4
Cldn8
Clec14a
Clec16a
Clec2g
Clec2l
Clec4a3
Clec4a4
Clec4b2
Clec4g
Clec9a
Clic1
Clic4
Clic6
Clip4
Cln8
Clnk
Clrn1
Clstn2
Clvs1
Clybl
Cmah
Cmc1
Cmc2
Cmklr1
Cmss1
Cmtm4
CN725425
Cnga3
Cnih3
Cnksr3
Cnnm2
Cnnm4
Cnot6
Cnpy1
Cnr1
Cntln
Cntn1
Cntn2
Cntn3
Cntn4
Cntn5
Cntn6
Cntnap2
Cntnap4
Cntnap5a
Cntnap5b
Cntnap5c
Coa6
Cobl
Cobll1
Coch
Cog6
Cog7
Col10a1
Col11a1
Col13a1
Col14a1
Col19a1
Col1a1
Col1a2
Col22a1
Col23a1
Col25a1
Col26a1
Col4a3
Col4a4
Col5a3
Col6a1
Col9a1
Commd10
Commd2
Commd4
Commd8
Copg2
Cops8
Copz1
Coq10b
Coq2
Corin
Coro1a
Cox10
Cox20
Cox5b
Cox6a1
Cox6c
Cox7a2l
Cox7b2
Cox7c
Cpa3
Cpa5
Cpa6
Cpb2
Cpe
Cpeb2
Cpeb3
Cplx2
Cpm
Cpne8
Cpsf6
Cpxm1
Cpxm2
Cr2
Crabp1
Cracr2a
Cradd
Crb1
Crb2
Creb3l1
Creb3l2
Creb5
Crebbp
Creg1
Creg2
Crem
Crh
Crhr1
Crim1
Crispld2
Crmp1
Crnkl1
Crnn
Crtc3
Crxos
Cry1
Cryaa
Cryba4
Crybg1
Cryl1
Cryz
Cse1l
Csf1
Csf2
Csf2rb
Csgalnact1
Csl
Csmd1
Csmd3
Csnk1g3
Csnka2ip
Csrp3
Cst10
Cst7
Cstad
Cstf2t
Cstf3
Ctbp2
Ctbs
Ctcf
Ctcfl
Ctdsp2
Ctdspl
Ctgf
Cth
Ctif
Ctla4
Ctnna2
Ctnna3
Ctnnb1
Ctnnd2
Ctsj
Ctsq
Ctsr
Cul1
Cul3
Cul5
Cuzd1
Cwc22
Cwh43
Cx3cr1
Cxadr
Cxcl12
Cxcl13
Cxcr4
Cxxc4
Cyb561
Cyb5a
Cyb5r2
Cybrd1
Cycs
Cylc2
Cyp17a1
Cyp19a1
Cyp1a1
Cyp1b1
Cyp26a1
Cyp26b1
Cyp27a1
Cyp2a4
Cyp2b10
Cyp2c50
Cyp2c55
Cyp2c67
Cyp2d12
Cyp2d26
Cyp2d37-ps
Cyp2d40
Cyp2e1
Cyp2f2
Cyp2j5
Cyp2j6
Cyp3a16
Cyp3a25
Cyp3a41a
Cyp3a41b
Cyp3a44
Cyp3a57
Cyp4a10
Cyp4a29
Cyp4a32
Cyp4x1
Cyp51
Cyp7b1
Cypt1
Cypt12
Cypt4
Cyr61
Cysltr2
Cystm1
Cyyr1
D10Wsu102e
D16Ertd472e
D1Ertd622e
D1Pas1
D3Ertd751e
D430019H16Rik
D430042O09Rik
D5Ertd579e
D630036H23Rik
D630039A03Rik
D7Ertd443e
Daam1
Dab1
Dab2
Dab2ip
Dach1
Dact1
Dact2
Dad1
Dand5
Dap
Dapk1
Dars
Dazap2
Dbh
Dbx1
Dbx2
Dcaf10
Dcaf4
Dcaf5
Dcbld1
Dcbld2
Dcc
Dcdc2a
Dcdc2c
Dchs1
Dchs2
Dck
Dclk1
Dclk3
Dcn
Dcp1a
Dcp1b
Dcp2
Dct
Dcun1d4
Ddah1
Ddhd1
Ddi1
Ddit4
Ddit4l
Ddx18
Ddx20
Ddx4
Dedd
Dedd2
Defb18
Defb33
Defb41
Defb42
Degs1
Degs2
Dennd1a
Dennd1b
Dennd2c
Dennd5a
Dennd6b
Depdc1a
Desi2
Deup1
Dgka
Dgkb
Dgkd
Dgkg
Dgkh
Dgki
Dgkz
Dguok
Dhh
Dhrs2
Dhrs4
Dhrs7
Dhx15
Dhx35
Dhx36
Dhx8
Diaph3
Dio2
Dio3
Diras1
Diras2
Dis3l2
Disc1
Disp1
Dkk1
Dkk2
Dkkl1
Dlc1
Dld
Dlg1
Dlg2
Dlg5
Dlgap1
Dlgap2
Dlk1
Dlst
Dlx1
Dlx6
Dmap1
Dmp1
Dmrt2
Dmrta1
Dmrta2
Dmrtb1
Dmxl1
Dmxl2
Dna2
Dnah12
Dnah14
Dnah5
Dnah7a
Dnah7b
Dnah8
Dnah9
Dnajb12
Dnajb6
Dnajb9
Dnajc1
Dnajc10
Dnajc13
Dnajc24
Dnajc27
Dnajc5b
Dner
Dnhd1
Dnm1l
Dnm3
Dnmt3a
Dnttip2
Doc2b
Dock1
Dock10
Dock2
Dock5
Dock6
Dock8
Dock9
Dok1
Dok5
Dok6
Donson
Dopey2
Dpcr1
Dpep1
Dpf3
Dph6
Dpp10
Dpp4
Dpp6
Dpp9
Dpt
Dpy19l1
Dpyd
Dr1
Drap1
Drd1
Drd3
Dsc1
Dsc3
Dscam
Dscaml1
Dse
Dsel
Dsg1c
Dsg2
Dsn1
Dst
Dthd1
Dtna
Dtnb
Dtnbp1
Dtwd2
Dtx1
Dusp10
Dusp23
Dusp26
Dusp4
Dusp5
Dusp6
Dydc1
Dync1h1
Dync1i1
Dync2li1
Dynlrb2
Dynlt1b
Dyrk1a
Dyrk2
Dyrk3
Dyrk4
Dysf
Dzank1
E030018B13Rik
E030025P04Rik
E130114P18Rik
E130308A19Rik
E2f3
E2f7
E2f8
E330021D16Rik
Ebf1
Ebf2
Echdc1
Eci2
Ect2
Edem1
Edem3
Edil3
Edn2
Ednra
Ednrb
Eea1
Eef2kmt
Eefsec
Eepd1
Efcab1
Efcab10
Efcab14
Efcab3
Efcab6
Efcab8
Efemp1
Efhb
Efhc1
Efna2
Efna5
Efnb2
Efr3a
Egfem1
Egflam
Egln3
Egr2
Ehbp1
Ehd4
Ehf
Eid1
Eif1b
Eif2ak3
Eif2d
Eif3d
Eif3h
Eif4a2
Eif4ebp1
Eif4g2
Elac2
Elavl4
Elf2
Ell2
Elmo1
Elmod1
Elovl6
Elp6
Emb
Emc2
Emid1
Emilin2
Eml2
Eml4
Eml5
Emx1
Emx2
Enc1
Endod1
Engase
Eno1b
Enox1
Enpep
Enpp1
Enpp2
Enpp3
Enpp6
ENSMUSG00000109903
ENSMUSG00000112187
Enthd1
Entpd1
Entpd6
Eomes
Ep300
Epas1
Epb41
Epb41l2
Epb41l3
Epb41l4a
Epb41l4b
Epb41l5
Epb42
Epha2
Epha3
Epha4
Epha5
Epha6
Epha7
Ephb1
Ephb3
Epm2a
Epn2
Epop
Eps15
Eps8
Erap1
Erbb4
Erbin
Erc2
Ercc4
Erdr1
Erf
Erg
Ergic2
Erich2
Ermard
Ern1
Errfi1
Erv3
Esp15
Esp23
Esp24
Esp31
Esp34
Esp38
Esr1
Esrrb
Etl4
Etnk1
Etnppl
Ets1
Etv1
Etv3
Etv5
Etv6
Eva1a
Evc
Evc2
Evx2
Ewsr1
Exoc1
Exoc3
Exoc3l4
Exoc4
Exoc6
Exoc6b
Exog
Ext1
Extl3
Eya1
Eya4
Ezh2
F13a1
F2rl3
F7
F830045P16Rik
Fabp2
Fabp7
Fads3
Fam107b
Fam110b
Fam110c
Fam114a2
Fam117b
Fam120b
Fam122a
Fam129a
Fam129c
Fam131b
Fam133b
Fam135b
Fam13a
Fam155a
Fam159a
Fam159b
Fam163a
Fam163b
Fam169b
Fam170a
Fam171b
Fam172a
Fam173b
Fam174a
Fam174b
Fam181b
Fam184a
Fam189a1
Fam196b
Fam198a
Fam198b
Fam19a1
Fam19a2
Fam19a3
Fam19a4
Fam19a5
Fam20b
Fam212b
Fam213b
Fam214a
Fam221a
Fam227b
Fam228a
Fam26f
Fam3c
Fam43a
Fam43b
Fam46c
Fam49a
Fam50b
Fam53b
Fam58b
Fam69a
Fam71a
Fam71d
Fam71e1
Fam76b
Fam78b
Fam81b
Fam83a
Fam83b
Fam84a
Fam84b
Fam91a1
Fam92a
Fam98b
Fancc
Fank1
Far1
Far2
Fasl
Fat1
Fat2
Fat3
Fat4
Fbln1
Fbln7
Fbn2
Fbp1
Fbrsl1
Fbxl12
Fbxl17
Fbxl21
Fbxl4
Fbxl7
Fbxo11
Fbxo21
Fbxo3
Fbxo30
Fbxo32
Fbxo33
Fbxo4
Fbxo45
Fbxo48
Fbxw19
Fbxw22
Fbxw26
Fbxw4
Fbxw7
Fcgr1
Fchsd2
Fcnb
Fem1c
Fer1l5
Fer1l6
Ferd3l
Fermt2
Fez1
Fezf2
Fgf1
Fgf10
Fgf12
Fgf14
Fgf18
Fgf9
Fgfbp3
Fgfr1
Fgfr2
Fggy
Fgl2
Fhad1
Fhit
Fhl2
Fhl4
Fhod3
Fibin
Figla
Fign
Fignl2
Fip1l1
Fkbp6
Fkrp
Fktn
Fli1
Flnc
Flrt2
Flrt3
Flt1
Fmc1
Fmo4
Fmo9
Fn1
Fndc5
Fndc7
Fnta
Fos
Foxa1
Foxa2
Foxb1
Foxc1
Foxd1
Foxd2
Foxd3
Foxe1
Foxf1
Foxg1
Foxi2
Foxi3
Foxj2
Foxj3
Foxk1
Foxl1
Foxn3
Foxn4
Foxo1
Foxo3
Foxo6
Foxp1
Foxp2
Foxq1
Frem2
Frg1
Frk
Frmd4a
Frmd5
Frmd8
Frrs1
Frs2
Fry
Frzb
Fscb
Fshr
Fsip2
Fst
Fstl4
Fstl5
Ftl1
Fto
Fuca2
Fut8
Fut9
Fxn
Fxyd4
Fxyd5
Fyb
Fyb2
Fyn
Fzd1
Fzd4
Fzd7
G0s2
G3bp1
G6pc2
G6pd2
Gab1
Gabarapl1
Gabbr1
Gabra1
Gabra2
Gabra4
Gabra5
Gabrb1
Gabrb2
Gabrb3
Gabrg1
Gabrg2
Gabrg3
Gabrr1
Gabrr3
Gadd45a
Gadd45g
Gadl1
Galc
Galnt1
Galnt13
Galnt18
Galnt2
Galnt3
Galnt5
Galnt7
Galntl6
Galp
Galr1
Galr2
Ganab
Gap43
Gapt
Garnl3
Gas1
Gast
Gata2
Gata3
Gata4
Gata6
Gatb
Gatsl2
Gbe1
Gbp2
Gcfc2
Gcgr
Gclc
Gcnt1
Gcnt2
Gda
Gdap1
Gdf6
Gdi2
Gdnf
Gdpd1
Gfi1
Gfra1
Gfra2
Gfra4
Gga1
Ggact
Ggh
Ggt7
Ggta1
Ghitm
Ghr
Gimd1
Gipc1
Gipc2
Gipc3
Gja1
Gja10
Gja4
Gjb5
Gjb6
Gjd2
Gkap1
Glcci1
Glce
Gldc
Gldn
Gli2
Gli3
Glis3
Glo1
Glp1r
Glra1
Glra3
Glrx3
Glt1d1
Glt28d2
Gm10020
Gm10073
Gm10076
Gm10097
Gm10110
Gm10118
Gm10139
Gm10184
Gm10188
Gm10192
Gm10220
Gm10234
Gm10260
Gm10271
Gm10283
Gm10295
Gm10306
Gm10308
Gm10309
Gm10320
Gm10324
Gm10330
Gm10354
Gm10358
Gm10375
Gm10406
Gm10428
Gm10436
Gm10479
Gm10715
Gm10717
Gm10720
Gm10721
Gm10750
Gm10767
Gm10772
Gm10800
Gm10801
Gm10837
Gm10944
Gm10945
Gm11011
Gm11042
Gm11077
Gm11099
Gm11111
Gm11114
Gm11127
Gm11146
Gm11168
Gm11214
Gm1123
Gm11232
Gm11639
Gm11733
Gm12117
Gm12184
Gm12695
Gm12728
Gm12830
Gm12886
Gm12887
Gm12888
Gm13090
Gm13124
Gm13212
Gm1330
Gm13420
Gm14147
Gm14180
Gm14496
Gm15130
Gm15217
Gm15319
Gm15446
Gm1553
Gm16223
Gm16427
Gm16432
Gm16485
Gm16494
Gm16503
Gm17087
Gm17332
Gm17430
Gm17455
Gm17535
Gm19410
Gm1979
Gm19965
Gm2016
Gm20379
Gm2075
Gm20773
Gm20939
Gm21060
Gm21293
Gm21370
Gm21738
Gm21830
Gm21870
Gm21949
Gm21973
Gm2310
Gm2381
Gm266
Gm28363
Gm2888
Gm3115
Gm3127
Gm3159
Gm3164
Gm3278
Gm3424
Gm34302
Gm3453
Gm3460
Gm35911
Gm3594
Gm3604
Gm3642
Gm3685
Gm3727
Gm3952
Gm4027
Gm4181
Gm428
Gm4340
Gm43517
Gm4353
Gm43720
Gm45716
Gm45783
Gm4707
Gm4763
Gm4791
Gm4846
Gm4847
Gm4861
Gm4881
Gm4884
Gm4894
Gm4922
Gm4950
Gm4951
Gm498
Gm5065
Gm5096
Gm5114
Gm5136
Gm5142
Gm5148
Gm5150
Gm5160
Gm5239
Gm527
Gm5407
Gm5415
Gm5426
Gm5431
Gm5447
Gm5458
Gm5519
Gm5538
Gm5591
Gm5592
Gm5662
Gm572
Gm5773
Gm5849
Gm5861
Gm5926
Gm597
Gm6133
Gm6576
Gm6594
Gm6657
Gm6741
Gm6793
Gm6811
Gm7030
Gm7075
Gm7275
Gm7298
Gm7347
Gm7356
Gm7489
Gm765
Gm7945
Gm7970
Gm8127
Gm815
Gm8251
Gm826
Gm8300
Gm8332
Gm8439
Gm8882
Gm8888
Gm9008
Gm906
Gm9195
Gm9242
Gm9602
Gm973
Gm9733
Gm9747
Gm9772
Gm9833
Gm9961
Gm9972
Gmds
Gmeb2
[truncated: 3,250 more rows]

## Sheet: DMG_CLDN6Low_EpiSCvsAPSD
0610009B22Rik
0610040J01Rik
1110004E09Rik
1190002N15Rik
1500009L16Rik
1500015O10Rik
1700001F09Rik
1700001J03Rik
1700003H04Rik
1700006A11Rik
1700007G11Rik
1700008P02Rik
1700009N14Rik
1700010I14Rik
1700011I03Rik
1700012A03Rik
1700015F17Rik
1700015G11Rik
1700016C15Rik
1700017D01Rik
1700019A02Rik
1700020N15Rik
1700025G04Rik
1700029H14Rik
1700040L02Rik
1700064H15Rik
1700066M21Rik
1700113H08Rik
1700123L14Rik
1810011H11Rik
1810011O10Rik
2010300C02Rik
2300009A05Rik
2310057J18Rik
2410141K09Rik
2510009E07Rik
2610001J05Rik
2610044O15Rik8
2810474O19Rik
2900026A02Rik
2900092C05Rik
3110018I06Rik
3300002I08Rik
4833423E24Rik
4921501E09Rik
4921509C19Rik
4921530L21Rik
4930407I10Rik
4930433I11Rik
4930435E12Rik
4930447A16Rik
4930447C04Rik
4930452B06Rik
4930453N24Rik
4930467E23Rik
4930523C07Rik
4930546C10Rik
4930550C14Rik
4930553M12Rik
4930555G01Rik
4930558K02Rik
4930564D02Rik
4930572O03Rik
4930583I09Rik
4930596D02Rik
4931408C20Rik
4931417E11Rik
4931423N10Rik
4931429L15Rik
4931440F15Rik
4932414N04Rik
4933402J07Rik
4933402N22Rik
4933405O20Rik
4933412E24Rik
4933415F23Rik
4933416C03Rik
4933421I07Rik
4933428G20Rik
5530400C23Rik
5530401A14Rik
5730480H06Rik
5730507C01Rik
5730508B09Rik
5730522E02Rik
6030419C18Rik
6030458C11Rik
6430548M08Rik
6720489N17Rik
8030423J24Rik
9130204L05Rik
9230109A22Rik
9530002B09Rik
9530068E07Rik
9630041A04Rik
A130051J06Rik
A1bg
A26c2
A2m
A330070K13Rik
A430005L14Rik
A530032D15Rik
A630001G21Rik
A830018L16Rik
A930003A15Rik
A930004D18Rik
A930033H14Rik
Aak1
Aasdhppt
Abca1
Abca12
Abca13
Abca16
Abca4
Abca8a
Abca8b
Abcb1a
Abcc12
Abcc4
Abcg2
Abcg3
Abhd17c
Abhd2
Abhd5
Abi3bp
Ablim1
Abra
Abt1
Acap2
Acbd7
Acnat2
Aco1
Acp6
Acss3
Actbl2
Actc1
Actl7b
Actr3
Actr6
Actrt3
Acvr1
Acvr2a
Acyp2
Adam12
Adam19
Adam2
Adam3
Adam30
Adam34
Adam6a
Adam6b
Adam7
Adamts12
Adamts18
Adamts19
Adamts2
Adamts20
Adamts3
Adamts6
Adamts9
Adamtsl1
Adar
Adarb2
Adat2
Adck1
Adcy2
Adcy5
Adcy8
Adcy9
Adcyap1
Adgb
Adgra3
Adgrb3
Adgre4
Adgrl2
Adgrl3
Adgrl4
Adgrv1
Adipor2
Ado
Adora2a
Adra1a
Adra1b
Adra1d
Adra2a
Adra2c
Adrb2
AF366264
AF529169
Afap1
Afdn
Aff3
Aftph
Aga
Agap1
Agbl1
Agbl4
Agbl5
Agk
Agmo
Ago1
Agpat3
Agpat4
Agps
Agr3
Agtpbp1
Agtr1b
Ahi1
Ahr
AI593442
Aig1
Aipl1
Ajap1
Akain1
Akap13
Akap2
Akap6
Akap7
Akr1b3
Akr1d1
Akr1e1
Akt3
Alad
Alcam
Aldh1a1
Aldh1a3
Aldh1b1
Aldh3a2
Aldh8a1
Aldoart1
Aldoart2
Alg10b
Alk
Alkbh8
Alox12
Alpk2
Alppl2
Alx1
Alx3
Amd1
Amd2
Amer2
Amigo2
Amph
Amy2a5
Anapc15-ps
Angel2
Angptl3
Ank3
Ankib1
Ankrd12
Ankrd16
Ankrd26
Ankrd44
Ankrd55
Ankrd7
Anks1b
Ano1
Ano3
Ano4
Ano5
Antxr2
Anxa1
Anxa2
Anxa3
Aoah
Aox4
Ap2m1
Ap5m1
Apaf1
Apba2
Apbb1ip
Apc2
Api5
Apob
Apobr
App
Appl2
Aptx
Aqp5
Arap2
Arap3
Arfgef1
Arfgef2
Arfip1
Arg1
Arglu1
Arhgap12
Arhgap15
Arhgap18
Arhgap20
Arhgap21
Arhgap23
Arhgap24
Arhgap26
Arhgap32
Arhgap33
Arhgap39
Arhgap42
Arhgap9
Arhgef10
Arhgef2
Arhgef26
Arhgef28
Arhgef38
Arid1b
Arid4b
Arid5b
Arl1
Arl15
Arl2
Arl4a
Arl4c
Arl5b
Arl6
Arl6ip6
Armc1
Armc3
Armc4
Arpin
Arpp21
Arrdc3
Arrdc4
Arsb
Arsi
Asap1
Asap2
Asb14
Asb18
Ascc3
Ascl1
Asic1
Asic2
Asic4
Asmt
Asnsd1
Asphd2
Asrgl1
Astl
Astn2
Asxl1
Asxl3
Atg10
Atg16l2
Atg4c
Atg5
Atg7
Atl2
Atoh1
Atoh7
Atp10a
Atp11b
Atp13a5
Atp1a1
Atp1b1
Atp1b3
Atp23
Atp2b1
Atp2b2
Atp5g1
Atp5g3
Atp5j
Atp5o
Atp6ap1l
Atp6v1g3
Atp6v1h
Atp8a1
Atp8b1
Atrnl1
Atxn1
Atxn2l
Atxn7l3b
AU041133
Auh
Auts2
Aven
Avpr1a
Avpr1b
AW554918
AW822073
Axin2
AY761185
Azi2
B230307C23Rik
B3galnt2
B3galt1
B3galt2
B3gat1
B3gat2
B3gnt9
B430305J03Rik
B930094E09Rik
Babam2
Bach1
Bach2
Bag4
Baiap2l1
Bak1
Bank1
Banp
Bard1
Barhl2
Barx1
Barx2
Basp1
Batf
Bax
Baz1b
Bbox1
Bbs10
Bbs4
Bbs9
BC030500
BC034090
BC048403
BC048507
BC049352
BC052040
BC067074
BC107364
Bcar3
Bcas1
Bcat1
Bcdin3d
Bche
Bckdhb
Bcl11a
Bcl11b
Bcl2l10
Bcl2l14
Bcl6
Bcl9
Bdkrb2
Bdnf
Begain
Bend3
Bend4
Bend5
Bhlhe22
Bhlhe40
Bicdl1
Bid
Blm
Bmi1
Bmp10
Bmp2
Bmp4
Bmp5
Bmp8a
Bmper
Bmpr1b
Bmt2
Bnc2
Bnip3
Boll
Bpgm
Bpifa2
Bpifa3
Bpifb9a
Bptf
Brinp1
Brinp3
Brip1
Brms1
Brms1l
Brsk1
Bsnd
Btbd11
Btbd3
Btbd35f11
Btbd35f12
Btbd35f27
Btbd35f3
Btbd35f5
Btbd35f6
Btbd9
Btg3
Btg4
Btnl6
Btrc
Bub3
C030005K15Rik
C130026I21Rik
C130060K24Rik
C1qa
C1qtnf7
C1qtnf9
C2cd5
C530025M09Rik
C7
C87436
C9
Cab39
Cabp2
Cachd1
Cacna1b
Cacna1c
Cacna1e
Cacna2d1
Cacna2d3
Cacnb2
Cacnb4
Cacng1
Cacng2
Cacng3
Cacng5
Cacybp
Cadm1
Cadm2
Cadm4
Calb1
Calca
Calcr
Calcrl
Cald1
Calm2
Camk1g
Camk2d
Camk2n1
Camk4
Camkmt
Cand1
Cap1
Capg
Capn13
Capn2
Capn3
Car10
Car13
Car14
Car4
Car8
Card11
Card19
Carf
Carmil1
Carmil2
Cartpt
Catsperb
Catsperg1
Cavin2
Cavin4
Cblb
Cbll1
Cbln1
Cbln2
Cbln3
Cbln4
Cbr4
Cc2d2a
Ccdc106
Ccdc112
Ccdc130
Ccdc141
Ccdc148
Ccdc15
Ccdc167
Ccdc171
Ccdc172
Ccdc173
Ccdc175
Ccdc178
Ccdc188
Ccdc3
Ccdc54
Ccdc59
Ccdc6
Ccdc68
Ccdc71l
Ccdc81
Ccdc85a
Ccdc88a
Ccdc89
Ccdc90b
Ccdc91
Ccdc94
Ccdc96
Ccl1
Ccl9
Ccnf
Ccng1
Ccnj
Ccnl1
Ccr1
Ccr3
Ccser1
Ccser2
Cct6b
Cd109
Cd160
Cd180
Cd200
Cd207
Cd209b
Cd209f
Cd2bp2
Cd36
Cd55b
Cd7
Cd83
Cd84
Cdc27
Cdc42bpa
Cdc42ep2
Cdc42ep3
Cdc42ep4
Cdc7
Cdca7
Cdh10
Cdh11
Cdh12
Cdh13
Cdh18
Cdh19
Cdh2
Cdh20
Cdh22
Cdh23
Cdh26
Cdh4
Cdh5
Cdh6
Cdh7
Cdh8
Cdh9
Cdk18
Cdk5r2
Cdk5rap2
Cdk6
Cdk8
Cdkal1
Cdkl4
Cdkn2c
Cdyl
Cdyl2
Ceacam10
Ceacam2
Cebpd
Celf2
Celf4
Cenpc1
Cenpe
Cenpf
Cenpw
Cep126
Cep162
Cep350
Cep41
Cep85l
Cers6
Cetn3
Cfap126
Cfap206
Cfap36
Cfap44
Cfap46
Cfap54
Cfap58
Cfdp1
Cfhr1
Cftr
Cggbp1
Cgnl1
Ch25h
Chchd3
Chchd6
Chd1
Chd2
Chd5
Chd6
Chd7
Chdh
Chic2
Chil1
Chil3
Chil4
Chl1
Chmp2b
Chmp7
Chodl
Chordc1
Chpt1
Chrac1
Chrm1
Chrm2
Chrm3
Chrna2
Chrna7
Chst1
Chst11
Chst2
Chst9
Chsy3
Ciart
Cic
Cilp
Cited2
CK137956
Cklf
Ckmt2
Clasp1
Clca2
Clcc1
Clcn1
Clcn4
Cldn1
Cldn11
Cldn8
Clec1a
Clec2l
Clec4a2
Clec4a3
Clec4a4
Clec9a
Clic5
Clic6
Clint1
Clip4
Cln8
Clnk
Clns1a
Clrn1
Clspn
Clstn2
Cltc
Clvs1
Clybl
Cma2
Cmas
Cmip
Cmklr1
Cmpk2
Cnbd1
Cndp2
Cnga3
Cnmd
Cnn3
Cnnm1
Cnot6l
Cnr1
Cntln
Cntn1
Cntn4
Cntn5
Cntn6
Cntnap2
Cntnap4
Cntnap5a
Cntnap5b
Cntnap5c
Coa3
Coa6
Cobl
Cog2
Cog6
Col11a1
Col12a1
Col13a1
Col14a1
Col19a1
Col1a1
Col1a2
Col22a1
Col23a1
Col24a1
Col25a1
Col26a1
Col4a3
Col4a4
Col6a1
Col8a1
Col9a1
Commd10
Commd3
Commd8
Commd9
Comp
Comtd1
Cops7b
Coq3
Corin
Coro6
Cox10
Cox14
Cox6c
Cox7c
Cpeb2
Cplx2
Cplx4
Cpm
Cpn2
Cpne5
Cpne8
Cps1
Cpsf2
Cpsf6
Cpxm2
Cr2
Cradd
Crb2
Creb1
Creb3l1
Creb3l2
Creb5
Crhr1
Crim1
Crispld1
Crlf2
Crmp1
Crnkl1
Crtac1
Cry1
Cryba2
Cryba4
Crybg1
Cryz
Csf2rb2
Csf3r
Csl
Csmd1
Csmd3
Csnk1a1
Csnk1g3
Csnk2a1
Csnk2a2
Csnka2ip
Csrp1
Cst10
Cst3
Cstf2t
Ctbp2
Ctdp1
Ctgf
Cth
Ctnna2
Ctnna3
Ctnnd2
Cts7
Ctsc
Ctso
Ctsq
Ctsr
Cubn
Cul1
Cul3
Cul7
Cux1
Cwc22
Cwc27
Cwh43
Cxadr
Cxcl12
Cxcl13
Cxxc4
Cyb561
Cycs
Cylc2
Cyp1b1
Cyp27a1
Cyp27b1
Cyp2a12
Cyp2a4
Cyp2b10
Cyp2b19
Cyp2c55
Cyp2c66
Cyp2d12
Cyp2d9
Cyp2r1
Cyp3a11
Cyp3a16
Cyp3a25
Cyp3a41a
Cyp3a41b
Cyp3a44
Cyp3a57
Cyp3a59
Cyp4f15
Cyp4f16
Cyp51
Cyp7b1
Cyp8b1
Cypt12
Cysltr2
Cyth1
Cyth4
Cyyr1
D130052B06Rik
D1Ertd622e
D1Pas1
D3Ertd751e
D430019H16Rik
D430041D05Rik
D630036H23Rik
D7Ertd443e
Daam1
Dab1
Dab2
Dab2ip
Dach1
Dact1
Dad1
Dars
Dazl
Dbn1
Dbx2
Dcaf10
Dcbld1
Dcbld2
Dcc
Dchs1
Dchs2
Dclk1
Dclk3
Dcn
Dcp1a
Dcstamp
Dct
Dcun1d5
Ddc
Ddx1
Ddx18
Ddx52
Dedd
Defb14
Defb33
Defb36
Defb41
Defb48
Degs2
Dek
Dennd1a
Dennd1b
Dennd4a
Depdc1a
Depdc1b
Desi2
Dgkb
Dgkg
Dgkh
Dhrs2
Dhrs4
Dhrs7
Dhrs9
Dhx15
Dhx35
Dhx40
Dhx9
Diaph2
Diaph3
Diexf
Dio2
Dio3
Dip2b
Dip2c
Diras2
Dis3l2
Disc1
Dkk1
Dkk2
Dkk3
Dkkl1
Dleu7
Dlg2
Dlg4
Dlgap1
Dlgap2
Dlk1
Dlx1
Dlx4
Dlx6
Dmap1
Dmbt1
Dmc1
Dmrt2
Dmrta1
Dmrta2
Dnah10
Dnah12
Dnah14
Dnah5
Dnah6
Dnah7c
Dnah8
Dnah9
Dnaic2
Dnajb12
Dnajb8
Dnajb9
Dnajc1
Dnajc10
Dnajc13
Dnajc24
Dnajc5b
Dner
Dnm3
Dnmbp
Dnph1
Dntt
Dock1
Dock10
Dock2
Dock4
Dock5
Dock7
Dock8
Dok5
Dok6
Donson
Dpf3
Dph6
Dpp10
Dpp4
Dpp6
Dpp8
Dpp9
Dpt
Dpy19l1
Dpyd
Dr1
Drd1
Drd5
Drosha
Dsc3
Dscam
Dscaml1
Dse
Dsel
Dthd1
Dtna
Dtnbp1
Dtwd1
Dtwd2
Dusp26
Dusp4
Dusp5
Dusp6
Dync1i1
Dync1i2
Dync2h1
Dynlrb2
Dynlt1b
Dynlt1c
Dyrk1a
Dyrk2
Dyrk4
Dysf
E030018B13Rik
E130114P18Rik
E230025N22Rik
E2f7
E2f8
E330014E10Rik
Ear14
Ebag9
Ebf1
Ebf3
Eci2
Ect2
Edar
Edem1
Edem3
Edil3
Edn1
Ednra
Ednrb
Eea1
Eef1e1
Eef2kmt
Eepd1
Efcab1
Efcab11
Efcab3
Efhb
Efna5
Efnb2
Efr3a
Egfem1
Egflam
Egln3
Ehf
Ehmt1
Eid2
Eif3d
Eif3h
Eif3m
Eif4e3
Eif4g2
Elavl2
Elf2
Elfn2
Ell2
Elmo1
Elovl6
Elp4
Emb
Emcn
Emid1
En1
Enc1
Engase
Enkur
Eno1b
Enox1
Enpep
Enpp2
Enpp6
Enpp7
ENSMUSG00000109903
ENSMUSG00000112611
Enthd1
Eomes
Epb41l2
Epb41l3
Epc1
Epc2
Epha2
Epha3
Epha4
Epha5
Epha6
Epha7
Ephb3
Ephb4
Ephx3
Epm2a
Epop
Erap1
Erbb4
Erbin
Erc1
Erc2
Ercc4
Ercc6
Ercc6l2
Ergic1
Erich6b
Ern1
Ero1lb
Erv3
Esd
Esp15
Esp16
Esp24
Esp31
Esp34
Esp36
Esp38
Esr1
Esrrg
Etd
Etl4
Etnk1
Etnppl
Ets1
Ets2
Etv1
Etv5
Evc2
Evx2
Exd2
Exoc4
Exoc6b
Exog
Eya4
Ezh2
Ezr
F11
F11r
F2rl3
Fa2h
Fabp4
Faf1
Faiml
Fam107b
Fam110b
Fam110c
Fam114a2
Fam117b
Fam120a
Fam135a
Fam135b
Fam159b
Fam161a
Fam163b
Fam168a
Fam169b
Fam172a
Fam173b
Fam174a
Fam174b
Fam181b
Fam184a
Fam184b
Fam189a1
Fam19a2
Fam19a3
Fam19a4
Fam19a5
Fam208a
Fam210b
Fam213b
Fam214a
Fam227b
Fam240b
Fam26d
Fam3b
Fam46a
Fam46c
Fam49a
Fam53a
Fam71d
Fam71f2
Fam78b
Fam84a
Fam84b
Fam92a
Fam98a
Fam98b
Fancc
Far2
Farp1
Fasl
Fat2
Fat3
Fat4
Fbl
Fbp1
Fbxl13
Fbxl17
Fbxl4
Fbxl7
Fbxo11
Fbxo28
Fbxo31
Fbxo33
Fbxo38
Fbxo4
Fbxo43
Fbxo7
Fbxo8
Fbxw10
Fbxw11
Fbxw13
Fbxw26
Fbxw4
Fbxw7
Fcgr1
Fcgr2b
Fcgr3
Fcho1
Fcnb
Fech
Fem1c
Fer1l6
Ferd3l
Fermt1
Fez1
Fezf1
Fgd2
Fgd4
Fgf1
Fgf10
Fgf12
Fgf14
Fgf20
Fgf23
Fgf8
Fgf9
Fgfr1
Fgfr1op
Fgfr2
Fgfrl1
Fggy
Fhit
Fhl2
Fhl5
Fhod3
Fign
Fignl2
Fktn
Fli1
Flrt2
Flrt3
Flt1
Fmo4
Fmo6
Fmo9
Fnbp1
Fnbp1l
Fos
Foxa2
Foxb1
Foxc1
Foxd1
Foxf1
Foxf2
Foxg1
Foxk1
Foxn3
Foxn4
Foxo1
Foxo6
Foxp1
Foxp2
Foxp4
Fpr-rs3
Fras1
Frem2
Frg1
Frk
Frmd4b
Frmd6
Frrs1
Frzb
Fsbp
Fscb
Fsd1l
Fshb
Fshr
Fsip1
Fsip2
Fst
Fstl5
Fto
Fuca2
Fut10
Fut8
Fut9
Fxn
Fxyd5
Fyn
Fzd1
Fzd4
Fzd5
Fzd7
G6pd2
Gabra2
Gabra4
Gabra5
Gabrb1
Gabrb2
Gabrb3
Gabrg1
Gabrg2
Gabrg3
Gabrr2
Gad1
Gadd45a
Gadd45g
Gadl1
Galc
Galm
Galnt13
Galnt15
Galnt16
Galnt18
Galnt2
Galnt3
Galnt5
Galnt7
Galntl6
Galr1
Gap43
Gapvd1
Garem1
Gars
Gas1
Gas2l3
Gas7
Gata3
Gata4
Gata6
Gatb
Gatsl2
Gbe1
Gbp2
Gbp4
Gbp5
Gbx1
Gcc2
Gcfc2
Gckr
Gclc
Gclm
Gcm1
Gcnt4
Gdap1
Gdf6
Gdf9
Gdi2
Gdnf
Gdpd1
Gem
Gfi1b
Gfra2
Gfral
Ggh
Ghitm
Ghr
Gimap3
Gimd1
Gins2
Gins3
Gja1
Gja10
Gjb5
Gjb6
Gk5
Gkn3
Glcci1
Glg1
Gli2
Gli3
Glipr1l2
Glo1
Glp1r
Glra1
Glra3
Glrb
Glrx3
Glrx5
Gls
Glt1d1
Glul
Gm10020
Gm10036
Gm10097
Gm10110
Gm10118
Gm10139
Gm10184
Gm10188
Gm10192
Gm10234
Gm10260
Gm10283
Gm10295
Gm10306
Gm10308
Gm10309
Gm10324
Gm10330
Gm10338
Gm10340
Gm10354
Gm10406
Gm1043
Gm10436
Gm10471
Gm10479
Gm10509
Gm10549
Gm10696
Gm10715
Gm10717
Gm10719
Gm10720
Gm10721
Gm10750
Gm10767
Gm10772
Gm10800
Gm10801
Gm10803
Gm10837
Gm10944
Gm10945
Gm10999
Gm11011
Gm11077
Gm11099
Gm11111
Gm11114
Gm11127
Gm11146
Gm11168
Gm11639
Gm12689
Gm12695
Gm12789
Gm12830
Gm12845
Gm12886
Gm12887
Gm12888
Gm13090
Gm13124
Gm13212
Gm13691
Gm14444
Gm14496
Gm15130
Gm1527
Gm15319
Gm156
Gm1587
Gm16223
Gm16432
Gm16494
Gm16503
Gm17332
Gm17455
Gm1979
Gm19965
Gm2016
Gm20379
Gm20738
Gm20820
Gm20939
Gm21293
Gm21320
Gm21370
Gm21738
Gm21830
Gm21870
Gm21949
Gm2310
Gm2381
Gm28360
Gm2888
Gm29106
Gm3045
Gm3115
Gm3127
Gm3149
Gm3376
Gm3424
Gm34302
Gm3453
Gm3460
Gm3476
Gm3486
Gm35911
Gm3604
Gm3642
Gm3727
Gm38100
Gm3839
Gm3952
Gm4340
Gm43517
Gm438
Gm45337
Gm4559
Gm45783
Gm45799
Gm4791
Gm4861
Gm4881
Gm4894
Gm5065
Gm5096
Gm5113
Gm5114
Gm5136
Gm5160
Gm5218
Gm5225
Gm527
Gm5286
Gm5407
Gm5415
Gm5426
Gm5447
Gm5565
Gm5591
Gm5592
Gm5615
Gm5689
Gm5773
Gm5849
Gm5861
Gm5926
Gm595
Gm597
Gm6337
Gm6460
Gm6576
Gm6588
Gm6594
Gm6614
Gm6619
Gm6657
Gm6793
Gm7030
Gm7275
Gm7334
Gm7347
Gm7356
Gm7535
Gm765
Gm7714
Gm7929
Gm7970
Gm8094
Gm826
Gm8300
Gm8332
Gm8356
Gm8362
Gm867
Gm8765
Gm8888
Gm8973
Gm9008
Gm9195
Gm9268
Gm94
Gm9513
Gm9602
Gm973
Gm9747
Gm9758
Gm9772
Gm9817
Gm9833
Gm9958
Gm9972
Gmds
Gmnc
Gnai1
Gnal
Gnao1
Gnaq
Gnat3
Gnaz
Gne
Gng2
Gng4
Gnpda2
Gnpnat1
Gns
Golga1
Golga4
Golga7
Golim4
Gorasp2
Got2
Gp2
Gpam
Gpat3
Gpbp1
Gpc5
Gpc6
Gpcpd1
Gpd2
Gpr137b
Gpr139
Gpr141
Gpr149
Gpr151
Gpr155
Gpr156
Gpr158
Gpr160
Gpr161
Gpr26
Gpr27
Gpr37
Gpr45
Gpr6
Gpr63
Gpr65
Gpr89
Gprin3
Gpx8
Gramd1a
Gramd1b
Gramd3
Grb10
Grb14
Grem2
Grhl2
Gria1
Gria2
Gria4
Grid1
Grid2
Grik1
Grik2
Grik3
Grik4
Grin2a
Grin3a
Grip1
Grk2
Grm1
Grm3
Grm4
Grm7
Grm8
Grpel2
Grtp1
Grxcr1
Gsdmc
Gse1
Gsk3b
Gsta2
Gstt2
Gtdc1
Gtf2a1
Gtf2e1
Gtf2h5
Gtf2i
Gtpbp10
Gucy1a2
Gucy1a3
Gulp1
Gxylt1
Gypa
Gypc
H2afy2
H2al2a
H2-DMa
H2-M10.6
H2-M11
H2-Oa
H2-Q1
H2-Q4
H2-Q6
H2-Q7
H60b
H60c
H6pd
Haao
Hacd2
Hacd4
Hace1
Hand2
Has2
Hbegf
Hcn1
Hcrtr2
Hdac7
Hdac9
Hddc2
Hdgfl1
Hdhd3
Hebp2
Hectd2
Hecw2
Helb
Herc1
Herc3
Herc4
Hes1
Hexa
Hexb
Hey1
Hey2
Hgf
Hhip
Hhipl2
Hibadh
Hic2
Hif1an
Higd1a
Hint3
Hira
Hist1h2ah
Hivep1
Hivep3
Hjurp
Hk1
Hlx
Hmcn1
Hmcn2
Hmg20a
Hmga2
Hmgb4
Hmgcll1
Hmgn1
Hmgn3
Hmx1
Hmx3
Hnf1b
Hnf4a
Hnf4g
Hnmt
Hnrnpa3
Homer1
Hormad2
Hoxa1
Hoxa13
Hoxb1
Hoxb13
Hoxb3
Hoxc11
Hoxc13
Hoxc4
Hoxc9
Hoxd1
Hoxd8
Hpcal1
Hpgds
Hps1
Hpse2
Hrasls
Hrh2
Hrh4
Hs2st1
Hs3st1
Hs3st2
Hs3st3b1
Hs3st4
Hs3st5
Hs6st1
Hs6st3
Hsbp1
Hsd17b12
Hsd17b2
Hsd17b4
Hsf2
Hsfy2
Hsp90b1
Hspa2
Hspa4
Hspa8
Hspb1
Hspb8
Htatip2
Htr1a
Htr1b
Htr1f
Htr2a
Htr4
Htr7
Hydin
Ibsp
Ica1
Ice1
Ice2
Id4
Iffo2
Ifi202b
Ifi203
Ifi211
Ifit1bl1
Ifngr1
Ifnlr1
Ift22
Ift57
Igbp1b
Igf1
Igf1r
Igfbp2
Igfbp3
Igfbp7
Igsf11
Igsf21
Igsf5
Ikzf1
Il12a
Il12b
Il12rb2
Il15
Il1b
Il1f5
Il1f8
Il1rl1
Il20rb
Il31ra
Il6
Il6st
Il7
Il7r
Ildr1
Ilvbl
Immp2l
Impad1
Impg1
Impg2
Ina
Inhba
Inip
Ino80c
Inpp1
Inpp4b
Inpp5a
Ins1
Ins2
Insc
Insig1
Insm1
Ints6
Intu
Invs
Ipmk
Ipo11
Ipo7
Iqcj
Iqcm
Iqsec3
Iqub
Irak1bp1
Irak3
Irf1
Irf2bpl
Irgq
Irx1
Irx2
Irx3
Irx4
Isl1
Ism1
Isx
Itga1
Itga2
Itga6
Itga8
Itga9
Itgal
Itgb1
Itgbl1
Itln1
Itpr1
Itpr3
Itsn2
Izumo3
Jade1
Jag1
Jak1
Jak2
Jam2
Jarid2
Jazf1
Jph1
Jph2
Jph3
Jrkl
Jun
Kalrn
Kank1
Kansl1
Kap
Kat2b
Kat6a
Katnal1
Katnal2
Kazn
Kbtbd12
Kcna1
Kcna2
Kcna3
Kcna4
Kcnb2
Kcnc1
Kcnc2
Kcnc3
Kcnd2
Kcnd3
Kcne4
Kcng1
Kcnh4
Kcnh5
Kcnh7
Kcnh8
Kcnip1
Kcnip3
Kcnip4
Kcnj15
Kcnj16
Kcnj2
Kcnj3
Kcnj6
Kcnj8
Kcnk1
Kcnk10
Kcnk12
Kcnk13
Kcnk2
Kcnk9
Kcnma1
Kcnmb2
Kcnn2
Kcnn3
Kcnq1
Kcnrg
Kcns3
Kcnt2
Kcnv1
Kcnv2
Kctd12
Kctd16
Kctd3
Kctd8
Kdm4c
Kdm4d
Kdm5a
Kdm8
Kdr
Kel
Khdc1b
Khdrbs2
Khdrbs3
Kif16b
Kif20b
Kif21a
Kif26b
[truncated: 2,331 more rows]
