# Supplementary material for: Differential ERK activity shapes the epiblast methylome influencing cell-context response to germ-layer differentiation signals.
Source: Research Square preprint supplement (doi:10.21203/rs.3.rs-3092600/v1), 2023-06-26
Supplement: Supplementary file 16 [file Supplementary Data 6.xlsx]

## Sheet: Upregulated (Pbx1-KO EpiSCs)
Gene name	Adjusted p-value
Gm6394	2.29813e-159
Ftl2-ps	6.63569e-74
Erdr1	1.08636e-40
Gm21887	2.11333e-34
Exoc3l	4.78946e-31
Mid1	8.49901e-26
Ftl1-ps2	3.85469e-24
AC154572.2	9.79326e-24
Fam131b	2.19966e-16
Sycp3	1.14263e-12
2810429I04Rik	2.05528e-12
Klhl22	2.87238e-12
Wt1	3.12974e-12
Dusp6	3.35554e-12
C130071C03Rik	3.60661e-12
Slc7a8	8.87052e-12
Sfrp2	8.42651e-11
Dnmt3b	9.69254e-11
Bst2	1.35696e-10
Pop4	6.75858e-10
Gstt2	8.18113e-10
Atcay	1.0429e-09
Acer2	1.24085e-09
Gldc	2.82679e-09
Tshz3	3.28262e-09
Twist1	5.31331e-09
Grik3	6.54223e-09
Cbr3	9.7077e-09
Mat2a	1.38361e-08
Platr10	2.90594e-08
Magel2	4.40304e-08
Fgf15	5.86821e-08
Etv4	8.21948e-08
Nell2	1.33129e-07
Jakmip2	1.92911e-07
Slc35d3	2.31102e-07
Fgf5	2.31521e-07
Zcchc12	3.63093e-07
Snrpn	4.23855e-07
Crmp1	4.74674e-07
Astn1	5.26654e-07
Gusb	6.06971e-07
Coro2b	6.37667e-07
St6gal2	1.01946e-06
Pdzd4	1.07118e-06
2900011O08Rik	1.17625e-06
Hmgb1	1.55001e-06
Serpini1	1.583e-06
Bcl11a	2.18016e-06
Tubb3	2.28127e-06
Zfp532	3.7747e-06
Miat	3.78051e-06
Spry4	4.36119e-06
Bzw1	4.36416e-06
Polg	6.74389e-06
Rtn4rl2	8.29246e-06
Ap1s2	1.03253e-05
Pcdhgb5	1.22523e-05
Tnfsf11	1.6274e-05
Sssca1	1.68703e-05
Enpp4	1.91143e-05
Pipox	1.94905e-05
Tns1	4.99409e-05
Mns1	5.48697e-05
Dpf1	6.81702e-05
Ndn	0.000101819
Syt11	0.000103108
Cgnl1	0.000104051
Uchl1	0.000109196
Inpp5f	0.000120182
Aff3	0.000184655
Tuba1a	0.000193026
Srm	0.00021171
Calm1	0.000213341
Slc27a2	0.000214455
Gm11478	0.000215353
G3bp2	0.00025225
Ccne1	0.000269199
Gm6166	0.000271195
Prdx1	0.000311197
Bend3	0.000321035
Ina	0.000321735
Elavl3	0.000324233
Kctd17	0.000326804
Snhg14	0.000337263
Fabp5	0.000411305
Rgl2	0.000435082
Trim2	0.000450299
Dcun1d4	0.00045609
Sned1	0.000456872
Fam171b	0.000494612
Cetn2	0.000498502
Utp4	0.000507268
Map1a	0.000515925
Bysl	0.000515925
Taf7	0.000519274
Tatdn2	0.000531706
Gtf3c6	0.00054724
Btbd17	0.000556686
Casp3	0.000577175
Hsph1	0.000581858
Nmral1	0.000594742
Car14	0.000597065
Fzd7	0.000635349
Trmt6	0.000673766
Spred3	0.000759474
Slc39a14	0.000840843
L1td1	0.000884616
Sez6	0.000896465
Bcor	0.000926634
Ppp1r11	0.000944988
Ccdc187	0.000953499
Slc35b4	0.00102505
Clip3	0.00111551
Vcan	0.00112532
Gsta4	0.00113692
Ptgr1	0.00114667
Ankrd34a	0.0011624
Chchd10	0.00120439
Nme1	0.0012541
Acot7	0.00125742
Tfe3	0.00126086
Ust	0.00128087
Zfp110	0.00148741
Cbx6	0.00151106
Wdr46	0.00153284
Acap3	0.00164856
Dtx1	0.00166699
Necab2	0.00183913
Gclm	0.00184508
Socs2	0.00192094
St8sia3	0.00207073
Soga3	0.00215983
Slc9a3r1	0.00215983
A630001G21Rik	0.00216031
Amt	0.00216324
Txnrd1	0.00218575
Ror1	0.00219686
Ptpn1	0.00221039
Pdzrn3	0.00224915
Me1	0.00229643
Nubp2	0.00229643
Rbm3	0.00233881
Prpf19	0.00239345
Psmc5	0.00244111
Mrpl20	0.00245155
Pno1	0.00245463
Slc35a4	0.00248828
Mmp25	0.0025162
Trh	0.00255994
Dhx37	0.00260539
Ptgis	0.0026784
Ddx18	0.00270248
Dhx33	0.00299195
Stk4	0.00312973
Gclc	0.00323305
Bop1	0.00330435
Atp10a	0.00357281
Rpl7l1	0.00359448
Zfp882	0.00381905
Sall1	0.0039315
Ino80c	0.00399769
Snrpb2	0.00399769
Ahsa1	0.00399769
Atf1	0.00405759
Wdr4	0.00415462
Elof1	0.00418335
Rxrg	0.0044462
Rpp25	0.0044652
Atp5g1	0.00448814
Mrpl12	0.00450285
Mfsd5	0.004531
Hspd1	0.00460744
Amd1	0.00469082
Phf5a	0.00472088
Srsf3	0.00489132
Mapk14	0.00489721
Atp5k	0.00489721
Dpy30	0.00491042
Elac2	0.0049688
Orc2	0.0049688
Srd5a1	0.00499556
Fam208a	0.00509372
Fgf4	0.00520112
Nt5c2	0.00520855
Slc43a2	0.00521667
Recql	0.00547197
Marcksl1	0.00554674
Ttpal	0.00555584
Nrxn2	0.00564121
Gm38312	0.00570044
Brinp2	0.00597245
Hvcn1	0.00597498
Jph4	0.00601661
Myrf	0.00601661
Asphd2	0.00619353
Spty2d1	0.00625152
Ahsa2	0.00625152
Stk39	0.00626999
Dph3	0.00660161
Zhx1	0.00669536
Prelid3b	0.00677452
Mfsd7b	0.00699433
Arpp19	0.00699433
Slc4a2	0.00704948
Foxd3	0.00707382
Cdh4	0.00717132
Dctn5	0.00717132
Pot1b	0.00726033
Tyms	0.00726033
Zfp101	0.00740713
Gprin1	0.00749316
Surf2	0.00750056
Cltb	0.00756265
Trim6	0.00756265
Calcr	0.00756265
Eras	0.00756993
Pik3r2	0.00758446
Fam49a	0.00762796
Gm15545	0.0076318
Rexo2	0.00792531
Zdbf2	0.00796312
Adk	0.00808321
Med7	0.00811462
Eny2	0.00811574
Ttc27	0.00811574
Spire2	0.00813677
Hdgfl3	0.00813677
Polr2j	0.00824625
Ywhab	0.00824625
Lef1	0.0082726
Fblim1	0.0082726
Tex21	0.00865731
Id2	0.00867827
Slc2a4rg-ps	0.00888041
Mtch1	0.00894586
Tspan6	0.00928966
Crlf2	0.00935519
Polr1e	0.00942334
Mettl7a1	0.00964547
Ube2e3	0.0098734
Zfp990	0.00998974
Ppp4r1	0.0103454
Lypla2	0.0104248
AC154335.2	0.0107243
Dhdh	0.0108406
Ltv1	0.0109083
Tmem151b	0.0109289
Ppil1	0.0109317
AW209491	0.0115925
Antxr1	0.0123176
Fetub	0.0123289
Ccdc40	0.0125955
Tor3a	0.0126156
Nkain1	0.0126156
Psmc4	0.0128142
Kcnh2	0.0130188
Rtn4rl1	0.0130559
Rars	0.0131457
Bud31	0.0135901
Dnaja1	0.0138041
Sh3gl3	0.0138052
E2f3	0.0138147
Hnrnpm	0.0139193
Cxcl12	0.0141177
U2af1	0.0142272
Vps52	0.0142654
Pgd	0.0143676
Rap1b	0.0145738
Dph2	0.0147089
Dbnl	0.0150251
Slc29a1	0.0151091
Denr	0.0151977
Guk1	0.0152214
Chst3	0.0152853
Clcn4	0.0155902
Map6	0.0156456
Stk40	0.015846
Emb	0.0161804
Plch1	0.0161892
Klhdc3	0.0163582
Phyhipl	0.0163647
Lypd6	0.0164225
Ap1s3	0.0166565
Cdc5l	0.0166576
3110082I17Rik	0.0167307
Srsf2	0.0172021
Ncoa5	0.0177248
Dhx32	0.0179743
E130309D02Rik	0.018105
Dhx9	0.0182597
Mrps18b	0.0191095
Prodh	0.0194584
Dkc1	0.0197224
Gm14124	0.0197694
Zmpste24	0.0199578
Insm1	0.0201482
Pitpna	0.0201599
Slc25a10	0.0201728
Pgap1	0.0203933
1700086O06Rik	0.0203954
Slc25a3	0.0203954
Tmco4	0.0208995
Dstn	0.0208995
H2afz	0.0209979
Srsf1	0.0215355
Ube2l3	0.021881
1810055G02Rik	0.0219943
Odc1	0.0220962
Skiv2l	0.0221867
Stmn3	0.0222805
Trir	0.0223401
Dpagt1	0.0226083
Qtrt2	0.0226155
Cnih2	0.0226219
Nsdhl	0.0227312
Nxf1	0.0229181
Slc35b1	0.0235284
Ccdc86	0.0235981
Pusl1	0.0236337
Ccnjl	0.0239493
Kdm8	0.0240683
Lmo4	0.0242698
Runx1	0.0243058
Wdr6	0.0246294
Coro1a	0.0246813
Cog8	0.0246813
Cdk2ap1	0.0246837
Trim27	0.0247286
Srxn1	0.025045
Ccdc114	0.0252389
Polr1b	0.0256457
2010204K13Rik	0.025772
Csnk2b	0.0258172
Shf	0.0263396
Fbxw4	0.0268305
Lrrn4	0.0268491
Prpf31	0.0268491
Yipf5	0.0268491
Abcc4	0.0269182
Vrtn	0.0271999
Ube2n	0.0273442
Lrrc14	0.0274356
Med22	0.0275003
Mettl17	0.0275687
Dclre1b	0.0277525
Fam136a	0.0277816
Tmem69	0.0279798
Tmem229a	0.0289409
Polr2d	0.0291257
Lrrc59	0.0293973
Hdac9	0.0295162
Nap1l1	0.0296965
Cox19	0.0300504
Bcat1	0.0300504
Rem2	0.0303873
Dda1	0.0307677
Pqbp1	0.0314726
Ufm1	0.031714
4930453N24Rik	0.0318685
Taf1c	0.0319276
Sbk1	0.0319984
Asf1a	0.0320572
Gemin7	0.0322582
Epha4	0.0327002
Nfyc	0.0330577
Fam169a	0.0333876
Gm14139	0.0336647
Polr2l	0.0336647
Mrps18a	0.0336697
Lrrc24	0.0340353
Clgn	0.0344266
Mir17hg	0.0347035
Lrrn1	0.0352201
Xkr6	0.0354184
Rab11b	0.035684
Spsb4	0.0357875
Srsf6	0.0360354
Ccnd1	0.0361346
Znrd1	0.0362434
Rab39b	0.0362984
Gas8	0.0364591
Sema4c	0.0370935
Ormdl3	0.0372283
Siah1b	0.0374413
Dgcr8	0.0381024
Nifk	0.0382699
Spry2	0.0383757
Eif1ad	0.0384502
Fbxo9	0.0386261
Def8	0.0389116
Ndufaf2	0.0394086
Herpud1	0.03955
Ppil4	0.0396915
Bola2	0.0404304
Cd3eap	0.0405234
Prr3	0.0405234
Grtp1	0.0409618
Lhfpl4	0.0414363
Epop	0.0419692
Pea15a	0.0420576
Slc38a1	0.0422847
Plekho1	0.0424565
Coa7	0.0431405
Mn1	0.0431572
Pfdn6	0.0438487
Eif6	0.0441223
Ccdc137	0.0443488
mt-Nd2	0.0445285
Sesn2	0.0448421
Lypd6b	0.04506
Tada1	0.0456448
Fam84b	0.0460641
mt-Nd4	0.0461244
Tmem208	0.0462447
Sptlc1	0.0463674
Dysf	0.047008
Slc35b2	0.0470296
Ddx3x	0.0478192
Cptp	0.0481549
Kif5a	0.0484201
Ppp1r18	0.0485385

## Sheet: Upregulated (WT EpiSCs)
Gene name	Adjusted p-value
Hprt	1.62797e-165
Ddx3y	1.14971e-152
Eif2s3y	1.10293e-122
Kdm5d	1.60123e-95
Rps15a-ps8	3.10063e-92
Uty	2.20151e-73
Man2b2	2.23675e-69
Trim67	1.37179e-65
Pbx1	2.50777e-48
Gm11814	1.08877e-46
Arfgef3	7.47774e-42
Lamc2	8.35417e-39
H19	7.35105e-37
Thsd7a	1.27299e-34
Mest	2.11333e-34
Gadd45b	2.9296e-32
Cpped1	5.05712e-32
Cyba	1.54469e-29
Lhfp	1.49411e-25
Thbs1	7.92486e-24
9130008F23Rik	5.97697e-21
Tnfrsf1b	1.84789e-20
Flnb	8.2757e-20
Gab1	1.74002e-17
Ahnak	2.71043e-16
Frrs1	1.54858e-15
Moxd1	5.11763e-15
Steap3	6.96637e-15
Pdzd2	1.73474e-14
Rnf213	2.87742e-14
Hif3a	6.57671e-14
Mme	8.59018e-14
Notch3	1.0949e-13
Macf1	1.1913e-13
Hspg2	6.25188e-13
Fam171a1	7.06964e-13
Sntb1	2.33906e-12
Ppp2r2c	4.41064e-12
Frem2	4.41064e-12
Ror2	5.29074e-12
Mum1l1	1.89773e-11
Igfbp3	4.23146e-11
Lrp1	4.46996e-11
Ftl1	4.54129e-11
Nrcam	4.65397e-11
Hjurp	6.3854e-11
Dsp	6.48172e-11
Herc1	9.12106e-11
Dst	2.33977e-10
Sema3b	2.35373e-10
Krt8	2.6517e-10
Fat1	2.84067e-10
Uevld	8.39027e-10
Kcnq3	1.33469e-09
Slit3	1.85138e-09
Fry	2.10187e-09
Phka1	2.35415e-09
Adgrg1	2.67096e-09
Prkdc	3.70377e-09
Anxa2	4.21642e-09
Unc45b	5.18801e-09
Pcdhgc3	1.02553e-08
Cdc42ep5	1.50281e-08
Ptpn14	2.1053e-08
Lpp	2.1053e-08
Notch2	2.26226e-08
Herc2	2.34171e-08
Syne2	5.04686e-08
Lrp2	5.96889e-08
Matn3	6.07953e-08
Zbtb20	6.68829e-08
Relb	7.01943e-08
Efemp1	1.36916e-07
Sema3c	1.78761e-07
Dync2h1	2.00134e-07
Dhrs7	2.03565e-07
Notch1	2.07943e-07
Usp11	2.28349e-07
Large1	2.28349e-07
Phlda2	2.74884e-07
Anln	2.76294e-07
Timp1	2.76294e-07
Zfp516	3.16533e-07
Ubr4	3.18072e-07
Nrk	3.29809e-07
Sfmbt2	3.63093e-07
Tpm1	3.86666e-07
Pcdh7	3.86666e-07
Ahnak2	4.19175e-07
Cyr61	5.57117e-07
Gas2	6.82641e-07
Pou6f1	7.22996e-07
Dync1h1	1.03498e-06
Sdc4	1.18037e-06
Kmt2d	1.25688e-06
Gm23935	1.52957e-06
Tead1	1.64275e-06
Bcam	1.96093e-06
Mcc	1.98703e-06
Ubn2	2.09571e-06
Fads6	2.22277e-06
Sat1	2.31811e-06
N4bp2	2.37738e-06
Plk5	2.63755e-06
Agrn	2.66918e-06
Ank2	3.36849e-06
Prss23	3.40125e-06
Mbnl2	3.42588e-06
Eogt	4.10178e-06
Parp4	4.15702e-06
Card10	4.23638e-06
Pdgfb	4.23638e-06
Mycbp2	4.74072e-06
Mki67	4.87319e-06
Zc3h6	6.8107e-06
Prox1	7.5508e-06
Atp2a3	8.84601e-06
Tenm4	9.15583e-06
Lama5	1.07671e-05
Tfcp2l1	1.17104e-05
Raph1	1.17424e-05
Osbpl5	1.47598e-05
Ttyh1	1.65775e-05
Pxdc1	1.7301e-05
Fras1	2.35814e-05
Plekha4	2.62251e-05
Agpat3	2.69708e-05
Tdrd7	2.6996e-05
4932438A13Rik	3.06032e-05
Prr5l	3.28618e-05
Tmem245	3.62447e-05
Myo18a	3.76686e-05
Maged2	3.80455e-05
Slc5a3	4.10963e-05
Ppp4r4	4.51852e-05
2410006H16Rik	4.5824e-05
Map3k15	5.7934e-05
Pid1	5.92244e-05
Wnk1	5.9794e-05
Reck	6.28053e-05
Zfhx3	6.56585e-05
Pkd1	6.60674e-05
Kif24	6.85709e-05
Vps13b	6.93611e-05
Hpcal1	7.60158e-05
Nanog	7.77815e-05
Gm10167	8.58092e-05
Perp	9.13644e-05
Pik3ip1	9.13644e-05
Clu	9.13644e-05
Kdm7a	9.38661e-05
Irs2	0.000100876
Afap1	0.000101066
Btg2	0.000101232
Lars2	0.000103751
Igf1r	0.000104659
Plag1	0.000110684
Huwe1	0.000127715
Igdcc4	0.000130348
Smg1	0.000137617
Dll3	0.000137617
CT010467.1	0.000138569
Sh3pxd2a	0.000139766
Vstm2b	0.000146136
Dok2	0.000148647
Nfkb2	0.000151409
Cenpf	0.00015471
Golgb1	0.000157351
Ahr	0.000164505
Fbn1	0.000177724
Synj2	0.000183593
Mlxipl	0.000210039
Csrp1	0.000214975
Iqsec2	0.00023089
Rras	0.000242524
Nmnat2	0.000246861
Ldlrap1	0.000249641
Pcdhgb8	0.000250972
Kmt2c	0.00025225
Plk2	0.000255055
Txnip	0.000282892
1810030O07Rik	0.000283175
Ikzf4	0.000293777
Cln6	0.000346927
Itgb4	0.000373018
Tapbp	0.000384109
Mov10	0.000384908
Cbl	0.000407686
Fat3	0.000410686
Vps13a	0.000411305
Mgarp	0.000424079
Stard13	0.00045609
Idh2	0.000456872
Bmp7	0.000459793
Mir6236	0.000467623
Pdcd4	0.000492589
Manea	0.000500078
Fbxl20	0.000515925
Wnt9a	0.000515925
Syde1	0.000576636
Pim3	0.000586128
Crebrf	0.000586889
Apoe	0.00059516
Trp53inp1	0.000605576
BC034090	0.000628419
Usp3	0.000634815
Pim1	0.000650877
Adcy3	0.00065116
Ak1	0.000655523
Usp24	0.000668073
Sgms1	0.000668491
Birc2	0.000673766
Cd59a	0.000678868
Zgrf1	0.000712352
Tuft1	0.000739087
Smim14	0.000747066
Tmc7	0.000761896
Dock6	0.000776789
Arhgef4	0.000860071
Rusc2	0.000878639
Lamc1	0.00089452
Axl	0.000921737
Llgl2	0.000926634
Htt	0.000936357
Fgfbp3	0.00095267
Dennd4b	0.000971571
Wipf3	0.00102727
Fkbp9	0.00104082
Syne1	0.00106114
Nf1	0.00109649
Aldh1b1	0.00110378
Ap2b1	0.00119694
Cald1	0.00125778
Tnks	0.00126541
Dqx1	0.00128851
Deptor	0.00129415
Hes1	0.00133027
Chmp4c	0.00133066
Piezo2	0.00143179
Creb3l2	0.00147869
Ptpn21	0.00154606
Pnpla3	0.00159885
Plekhf2	0.00161957
Rassf3	0.00164257
Vcl	0.00164885
Aldh6a1	0.00169169
Aass	0.00169169
Brwd3	0.00176687
Stxbp5	0.0018871
Rcn3	0.0018871
Gstp1	0.00200903
S100a10	0.00202009
Unc13b	0.00212177
Dact2	0.00215983
Aspm	0.0021609
Lnpep	0.00221039
H2afy	0.00225774
Igf2r	0.00226497
Nbeal1	0.00229469
Podxl	0.00230277
Prex1	0.0023428
Kirrel	0.00235828
Fryl	0.00239345
Tnrc6b	0.00243237
Dixdc1	0.00244111
Ryk	0.00247474
Cercam	0.00254149
Amotl2	0.00263664
Arhgap8	0.00263664
Glg1	0.00265103
Igf2	0.00270248
Tsga10	0.00270643
Dgkh	0.00277409
Rab12	0.00280056
Vamp1	0.00280495
Mafk	0.00283149
9330102E08Rik	0.0028587
Sh3rf1	0.00295953
Stat5a	0.00306633
Coq8a	0.00310642
Aes	0.00311354
Wls	0.00311799
Tmem8b	0.00316755
Rnh1	0.00325481
Megf8	0.00328589
Akap13	0.00330602
Vps13c	0.003405
Shb	0.00341201
Fam114a1	0.00343784
Cntn2	0.00357281
Man1c1	0.00357281
Bach2	0.00357281
Csad	0.00365277
Sgce	0.00365277
Serinc5	0.00365277
Adrb1	0.00374866
Azin2	0.00380423
Mib1	0.00380748
Smug1	0.00380748
Pnmal2	0.00380748
Rfx3	0.0038398
Eml2	0.00390052
Map3k20	0.00390126
Col4a5	0.00392837
Sin3b	0.00398567
Neat1	0.00399769
Cd81	0.00401455
Dact3	0.00406601
Sbf2	0.00409494
Pawr	0.00411279
Rnf169	0.00413227
Xrn1	0.00414989
Jak2	0.00415462
Epb41l1	0.00418335
Cpd	0.00418903
Nfat5	0.00418903
Ago2	0.00430349
Rgmb	0.00430761
Mdfic	0.00441037
Cavin1	0.00451347
Hspb8	0.00452049
Csnk1g1	0.00455451
Gm21781	0.0045956
Neil2	0.0045956
Ptpdc1	0.00461919
Arhgef18	0.00468873
Wrn	0.00472088
Svop	0.00482537
Gm37494	0.00490689
Socs1	0.00490689
Birc6	0.00494072
Lrp4	0.0049688
Ripor1	0.00504869
Lrba	0.00505424
Pcnx	0.00518028
Kbtbd2	0.00518028
Zfpm1	0.00545947
Sacs	0.00552528
Bmpr2	0.00555584
Akap9	0.0055891
Slc2a3	0.00570044
Rasd2	0.00588869
Lrpap1	0.00596257
Sytl2	0.00597387
Ppm1k	0.00600511
Insr	0.00602527
Cep85l	0.00607265
Naga	0.00608137
Mroh2a	0.00611522
Tgfbr3	0.00611566
Gstz1	0.00611869
Rab11fip1	0.00614421
Bcl2	0.00614421
Scarf2	0.00622308
Adrb3	0.00646053
Cep350	0.00647845
Tmem106b	0.0065463
Fcho1	0.00655495
Lynx1	0.00665274
Sh3bp4	0.00669536
Abca5	0.00673367
Bsg	0.00678934
Lyrm9	0.00698256
Brwd1	0.00699433
Ehbp1	0.00699433
Trim56	0.00715326
Zbtb44	0.00739168
Xkr4	0.00739485
Gm16185	0.00740713
Fgd5	0.00742312
Kifc3	0.00749316
Anxa11	0.00750056
Smtn	0.00762335
Fam83b	0.00762505
Tnfrsf10b	0.00767606
Epb41l2	0.00769803
Dusp4	0.00778121
Sfi1	0.00780034
Gm15564	0.00781799
Gm26767	0.00787323
Arhgef17	0.00811462
Rgs17	0.00830952
Med12l	0.0083642
Myo1e	0.00848136
Lats2	0.00852817
Rreb1	0.00858276
Stard9	0.00867827
Eya1	0.00867827
Chst14	0.00884918
Endod1	0.00914986
Als2cl	0.00917816
Sec16a	0.00924656
Fam160a1	0.00926114
Zfr2	0.00929529
Fndc3b	0.0093172
Eef1akmt2	0.00942334
Kif13b	0.00945668
Klhl13	0.00957956
Prkab2	0.0098734
Stat2	0.0098734
Map3k2	0.0098812
Cntnap1	0.00989896
Tmem94	0.0103454
Pak3	0.0103454
Cuedc1	0.0104248
Plxnb2	0.0106227
Wnk2	0.0107554
Atm	0.0109595
Aifm3	0.0109595
Itpr1	0.0109783
Prelid2	0.0109992
Fcho2	0.0113238
Cacng6	0.0116101
D630045J12Rik	0.0116769
Eda2r	0.0118892
Insl6	0.0119842
Khnyn	0.0121427
Zc3hav1l	0.0121951
Ephx1	0.0123176
Pdlim3	0.0124404
Zcchc24	0.0126156
Tep1	0.0126574
Klhl4	0.0128037
Nfkbia	0.0135901
Dnajb4	0.0135901
Eif4b	0.0137185
Kif14	0.0138041
Klf15	0.0138625
Klhl24	0.0139655
Braf	0.014028
Hebp1	0.0141177
Kmt2a	0.0145414
Zmat3	0.0146663
Il17rd	0.0153164
Sfn	0.0155363
Clic6	0.0155947
Lmntd2	0.0158093
Slc9a5	0.0160158
Shroom3	0.0160568
Pgm2	0.0160968
Tdrd5	0.0166565
D430042O09Rik	0.0166967
Cers6	0.0167346
Ccdc82	0.0167355
Naglu	0.0170453
Polk	0.0172871
Creb5	0.0172871
Zfp652	0.017509
Utp14b	0.017509
1700003F12Rik	0.017532
Wtip	0.0178711
Fbxo3	0.0178843
Ldlrad4	0.0178843
Bcar3	0.0178989
Slc4a11	0.0178989
Malat1	0.0180241
Zc3hav1	0.0183033
Rnft2	0.0183295
Lpar6	0.0183423
Sh2d3c	0.0183423
Mir5125	0.0186287
Acvr2b	0.0186502
Pcmtd2	0.0187838
Ccnd2	0.0190234
Rad51d	0.0190418
Zc3h11a	0.0194452
Srcap	0.0194584
Ezh1	0.0195229
Adssl1	0.0197306
Slc2a8	0.0202569
Nenf	0.0203493
Fbxw9	0.0209979
Unc13a	0.0217117
Itpkb	0.0220962
Aldoc	0.0221954
Dyrk1b	0.0222805
Igsf9b	0.0222805
Tbc1d8	0.0222805
Ulk2	0.0223769
Pold4	0.0225889
Asap3	0.0225889
Arap2	0.0226264
St5	0.0227655
Tmtc4	0.022993
Gyg	0.0230094
Sirpa	0.0235284
Decr1	0.0235514
Scmh1	0.0236337
Dennd4a	0.0236337
Rab11fip5	0.0236337
Mroh1	0.0237336
Tbc1d12	0.0239493
Bbx	0.0240792
Cacna1h	0.0243368
Garnl3	0.0245332
Hbp1	0.0246294
Heatr5b	0.0250312
Rffl	0.0250312
Tmem191c	0.0252789
Cdc42bpg	0.0259105
Zfp703	0.0260069
Lif	0.0260069
Pfkfb3	0.0260197
Helz2	0.0260215
Ncoa1	0.026522
Celf2	0.0265778
Prnp	0.0265926
Mfsd13a	0.0268491
Zdhhc9	0.0268491
Fam3a	0.0268997
Pkn3	0.0270231
Arhgef39	0.0270338
Synm	0.0272483
Arfgap3	0.0273865
Primpol	0.0275687
Elf1	0.0276142
Exoc4	0.0279765
Syt17	0.0280274
Mpv17l	0.0281982
Zfc3h1	0.0285337
Ulk1	0.0291257
Pam	0.0295162
Papss1	0.0296479
Leng8	0.0299804
Soat1	0.0303425
Anxa5	0.0303736
Cdkn1a	0.0304311
Dusp18	0.0306968
Ift140	0.0308013
Dcxr	0.0308598
Prkx	0.0308919
Pdlim2	0.0310773
Ass1	0.0312763
Cdc25b	0.0315683
Ltbp3	0.0315683
Rbms1	0.0317351
Ccnf	0.0321897
Frmd4b	0.0324303
Gpr4	0.0325038
Sirt4	0.0325038
Akt3	0.0327663
Spaca6	0.0331971
Idua	0.0337525
Rhbdf1	0.0338572
Aspg	0.0338677
Pink1	0.0347035
Klhl26	0.0349884
Katnal1	0.0350294
Sil1	0.0350341
Nktr	0.03536
Tmeff2	0.03536
Grina	0.035477
Cep89	0.0358387
Zfand4	0.0361346
Haghl	0.0365991
Zfp974	0.0372939
Eid2b	0.037325
Ggta1	0.037623
Mdm4	0.0378305
Man2a2	0.0381024
Akap7	0.0383872
Zbtb4	0.0385387
Evi5l	0.0394086
Slc12a6	0.0397937
Dynlt3	0.0397937
Mettl26	0.0405234
Arhgef9	0.0405234
Heca	0.041061
Mindy2	0.0420576
Atp7b	0.0427925
Cdh3	0.0430215
Acad11	0.0431572
Psrc1	0.0435125
Plekhg3	0.0437989
Kdsr	0.0439546
Morc4	0.0441767
Mettl27	0.0445903
Dhtkd1	0.0445915
C1qtnf12	0.0449578
Exoc6b	0.0456448
Pld2	0.045834
Car11	0.0458393
Slc27a1	0.046165
Mapkbp1	0.0461998
1700030K09Rik	0.0463255
Lipg	0.0464648
Elf4	0.0464955
Prkaa2	0.0466842
Syt13	0.0468946
Nptxr	0.047008
Atp10d	0.0472933
Ptpru	0.0476617
Arhgef10	0.0483356
Cd68	0.0483377
Npc1	0.0493369
Dusp8	0.0493369
