# Supplementary material for: Differential ERK activity shapes the epiblast methylome influencing cell-context response to germ-layer differentiation signals.
Source: Research Square preprint supplement (doi:10.21203/rs.3.rs-3092600/v1), 2023-06-26
Supplement: Supplementary file 19 [file Supplementary Data 7.xlsx]

## Sheet: DAP_Pbx1_vs_WT_EpiSC_FDR_0.05
PeakID (cmd=annotatePeaks.pl HOMER/Pbx1_vs_WT_EpiSC_FDR_0.05.peaks mm10 -annStats HOMER/Pbx1_vs_WT_EpiSC_FDR_0.05.annotated.annStats)	Chr	Start	End	Annotation	Detailed Annotation	Distance to TSS	Nearest PromoterID	Entrez ID	Nearest Unigene	Nearest Refseq	Nearest Ensembl	Gene Name	Gene Alias	Gene Description	Gene Type
13790	chr17	29451139	29451639	Intergenic	Intergenic	-39656	NM_008842	18712	Mm.405293	NM_008842		Pim1	Pim-1	proviral integration site 1	protein-coding
29983	chr7	127386917	127387419	promoter-TSS (NM_030226)	promoter-TSS (NM_030226)	-2	NM_030226	78921	Mm.200950	NM_030226	ENSMUSG00000030823	9130019O22Rik	-	RIKEN cDNA 9130019O22 gene	protein-coding
32198	chr9	6736306	6736806	Intergenic	RLTR9A2|LTR|ERVK	440490	NM_029851	110350	Mm.237596	NM_029851	ENSMUSG00000047193	Dync2h1	4432416O06Rik|AI448217|D030010H02Rik|D330044F14Rik|DHC1b|DHC2|Dnchc2|b2b414Clo|mKIAA1997	dynein cytoplasmic 2 heavy chain 1	protein-coding
20160	chr3	53110554	53111054	intron (NM_175386, intron 2 of 3)	MLT1B|LTR|ERVL-MaLR	69257	NM_175386	108927	Mm.118617	NM_175386	ENSMUSG00000048332	Lhfp	2810489O06Rik|AI194968	lipoma HMGIC fusion partner	protein-coding
13962	chr17	33981076	33981576	promoter-TSS (NR_033305)	promoter-TSS (NR_033305)	-166	NR_033305	433100	Mm.380381	NM_001013793		AA388235	-	expressed sequence AA388235	ncRNA
33391	chr9	74365951	74366451	Intergenic	Intergenic	255867	NM_001033500	546144	Mm.335289	NM_177908	ENSMUSG00000044976	Wdr72	AW558070|D230040E23	WD repeat domain 72	protein-coding
26737	chr6	62889097	62889597	Intergenic	Intergenic	-367510	NM_008167	14804	Mm.439651	NM_008167		Grid2	B230104L07Rik|GluD2|GluRdelta2|Lc|Lc<J>|MMS10-AC|Ms10ac|cpr|ho|nmf408|tpr	glutamate receptor, ionotropic, delta 2	protein-coding
14287	chr17	47511060	47511560	intron (NM_001081636, intron 1 of 6)	intron (NM_001081636, intron 1 of 6)	6259	NM_001081636	12445	Mm.27291	NM_007632	ENSMUSG00000034165	Ccnd3	9230106B05Rik|AA682053|AL024085|AW146355|C78795	cyclin D3	protein-coding
9247	chr13	102957787	102958287	intron (NM_175171, intron 4 of 28)	intron (NM_175171, intron 4 of 28)	264479	NM_008533	17079	Mm.373974	NM_008533	ENSMUSG00000021624	Cd180	F630107B15|Ly78|RP105	CD180 antigen	protein-coding
13715	chr17	27820589	27821089	promoter-TSS (NM_001044719)	promoter-TSS (NM_001044719)	-297	NM_001044719	224647	Mm.196577	NM_001033279	ENSMUSG00000056692	D17Wsu92e	AU020189|C030010A15|C80239	DNA segment, Chr 17, Wayne State University 92, expressed	protein-coding
29347	chr7	87096421	87096921	Intergenic	MMERVK9C_I-int|LTR|ERVK	100206	NM_001105190	621430	Mm.469903	NM_001105190	ENSMUSG00000090362	Vmn2r79	EG621430	vomeronasal 2, receptor 79	protein-coding
5060	chr11	72042082	72042582	promoter-TSS (NM_144526)	promoter-TSS (NM_144526)	-170	NM_144526	109212	Mm.33118	NM_144526	ENSMUSG00000020808	Fam64a	2610008F03Rik|6720460F02Rik|AI115087|CATS	family with sequence similarity 64, member A	protein-coding
6899	chr12	49385154	49385654	exon (NM_008241, exon 2 of 2)	exon (NM_008241, exon 2 of 2)	2397	NM_008241	15228	Mm.4704	NM_008241	ENSMUSG00000020950	Foxg1	2900064B05Rik|BF-1|Bf1|Hfh9|Hfhbf1	forkhead box G1	protein-coding
8538	chr13	48732471	48732971	Intergenic	CpG	69685	NM_007526	12022	Mm.42241	NM_007526	ENSMUSG00000021381	Barx1	-	BarH-like homeobox 1	protein-coding
13739	chr17	28313199	28313699	promoter-TSS (NM_001163820)	promoter-TSS (NM_001163820)	-81	NM_001163820	72775	Mm.201859	NM_028348		Fance	2810451D06Rik|AI415634|AW209126	Fanconi anemia, complementation group E	protein-coding
13959	chr17	33968472	33968972	Intergenic	Intergenic	10069	NR_004446	630499	Mm.440940	NM_001081015		H2-K2	EG630499|Gm7035|H-2K1|H-2K1K|H-2K2|H2-K1	histocompatibility 2, K region locus 2	pseudo
29101	chr7	67613889	67614389	intron (NM_027413, intron 5 of 5)	intron (NM_027413, intron 5 of 5)	31097	NR_028143	67867	Mm.31247	NM_027413	ENSMUSG00000030556	Lrrc28	1300004K21Rik|2210012C09Rik|2310058O11Rik	leucine rich repeat containing 28	protein-coding
14041	chr17	35262764	35263264	promoter-TSS (NM_010380)	promoter-TSS (NM_010380)	-80	NM_010380	14964	Mm.439675	NM_010380	ENSMUSG00000073411	H2-D1	H-2D|H2-D	histocompatibility 2, D region locus 1	protein-coding
28035	chr7	4912203	4912703	Intergenic	ORR1B2|LTR|ERVL-MaLR	-2764	NM_170759	232816	Mm.27442	NM_170759	ENSMUSG00000074406	Zfp628	Zec|Znf628	zinc finger protein 628	protein-coding
18856	chr2	143914978	143915478	promoter-TSS (NM_019771)	promoter-TSS (NM_019771)	-103	NM_019771	56431	Mm.28919	NM_019771	ENSMUSG00000015932	Dstn	2610043P17Rik|ADF|AU042046|Dsn|corn1|sid23p	destrin	protein-coding
13753	chr17	28691082	28691582	promoter-TSS (NM_001168514)	promoter-TSS (NM_001168514)	-10	NM_001168508	26416	Mm.311337	NM_011951	ENSMUSG00000053436	Mapk14	CSBP2|Crk1|Csbp1|Mxi2|PRKM14|PRKM15|p38|p38-alpha|p38MAPK|p38a|p38alpha	mitogen-activated protein kinase 14	protein-coding
3829	chr10	127893665	127894165	Intergenic	MLTR11B|LTR|ERVK	-4620	NM_027301	70061	Mm.158320	NM_027301	ENSMUSG00000040127	Sdr9c7	1810054F20Rik|Rdh20|Rdhs|SDR-O|Sdro	4short chain dehydrogenase/reductase family 9C, member 7	protein-coding
13771	chr17	29080754	29081254	Intergenic	Intergenic	-1878	NR_036469	100504267	Mm.438550	NR_036469	ENSMUSG00000085912	Trp53cor1	Gm16197|OTTMUSG00000031656|linc-p21|lincRNA-p21	tumor protein p53 pathway corepressor 1	ncRNA
28935	chr7	47830098	47830598	Intergenic	Intergenic	151948	NM_153524	235854	Mm.207065	NM_153524	ENSMUSG00000067173	Mrgpra4	Mgrg10|MrgA4	MAS-related GPR, member A4	protein-coding
13958	chr17	33955513	33956013	promoter-TSS (NM_172620)	promoter-TSS (NM_172620)	-119	NM_172620	224705	Mm.448614	NM_172620	ENSMUSG00000024319	Vps52	ARE1|D130068D18|D430041K17Rik|SAC2|Sacm2l|tclw5	vacuolar protein sorting 52 (yeast)	protein-coding
34159	chr9	122868288	122868788	Intergenic	MTA_Mm-int|LTR|ERVL-MaLR	-2532	NM_173364	235682	Mm.326477	NM_173364		Zfp445	AW610627|ZNF168|Znf445|mszf29|mszf50	zinc finger protein 445	protein-coding
14252	chr17	46704843	46705343	promoter-TSS (NM_009358)	promoter-TSS (NM_009358)	-91	NM_009358	21770	Mm.295009	NM_009358	ENSMUSG00000059409	Ppp2r5d	B'delta|TEG-271|Tex271	protein phosphatase 2, regulatory subunit B', delta	protein-coding
3757	chr10	126330454	126330954	Intergenic	Intergenic	364485	NM_177152	320398	Mm.275586	NM_177152	ENSMUSG00000020105	Lrig3	9030421L11Rik|9130004I02Rik|9430095K15Rik|mKIAA3016	leucine-rich repeats and immunoglobulin-like domains 3	protein-coding
19632	chr2	177206249	177206749	Intergenic	Intergenic	-258243	NM_001177568	628308	Mm.460436	NM_001177568		Gm14420	OTTMUSG00000016588	predicted gene 14420	protein-coding
17062	chr2	14665173	14665673	intron (NM_023116, intron 2 of 13)	B4A|SINE|B4	-55219	NR_028497	625342	Mm.484784	NR_028497		Gm13315	OTTMUSG00000011384	lactate dehydrogenase A pseudogene	pseudo
16622	chr19	44388384	44388884	Intergenic	Intergenic	19075	NM_009127	20249	Mm.267377	NM_009127	ENSMUSG00000037071	Scd1	AA589638|AI265570|Scd|Scd-1|ab	stearoyl-Coenzyme A desaturase 1	protein-coding
11411	chr15	75890232	75890732	TTS (NM_172607)	TTS (NM_172607)	-1759	NM_001282443	223645		NM_001282443		Mroh6	Gm19570	maestro heat-like repeat family member 6	protein-coding
26067	chr5	149052836	149053336	promoter-TSS (NM_010439)	promoter-TSS (NM_010439)	-49	NM_010439	15289	Mm.207047	NM_010439	ENSMUSG00000066551	Hmgb1	DEF|HMG-1|Hmg1|SBP-1|amphoterin|p30	high mobility group box 1	protein-coding
28728	chr7	39716340	39716840	Intergenic	Intergenic	198824	NM_001004139	70227	Mm.333800	NM_001004139	ENSMUSG00000068959	Zfp619	3000002G13Rik	zinc finger protein 619	protein-coding
14249	chr17	46674094	46674594	promoter-TSS (NM_144857)	promoter-TSS (NM_144857)	-89	NM_144857	224823	Mm.45101	NM_144857	ENSMUSG00000023971	Rrp36	-	ribosomal RNA processing 36 homolog (S. cerevisiae)	protein-coding
14214	chr17	46027618	46028118	intron (NM_001025257, intron 2 of 5)	intron (NM_001025257, intron 2 of 5)	-2705	NM_001110266	22339	Mm.282184	NM_009505	ENSMUSG00000023951	Vegfa	Vegf|Vpf	vascular endothelial growth factor A	protein-coding
6064	chr11	105507847	105508348	Intergenic	Intergenic	-51362	NM_001039242	632687	Mm.121570	NM_172568	ENSMUSG00000078627	2010-03-01	4933417C16Rik|AV039223|OTTMUSG00000002847|Rnf190	membrane-associated ring finger (C3HC4) 10	protein-coding
4694	chr11	57829033	57829533	3' UTR (NM_008213, exon 2 of 2)	3' UTR (NM_008213, exon 2 of 2)	2864	NM_008213	15110	Mm.4746	NM_008213	ENSMUSG00000037335	Hand1	Ehand1|Hxt|Th1|Thing1|bHLHa27|eHAND	heart and neural crest derivatives expressed transcript 1	protein-coding
1157	chr1	120345066	120345566	Intergenic	Intergenic	4734	NM_207233	226359	Mm.337409	NM_207233	ENSMUSG00000036907	C1ql2	BC040774|CTRP10	complement component 1, q subcomponent-like 2	protein-coding
5572	chr11	93404286	93404786	intron (NM_028296, intron 3 of 8)	intron (NM_028296, intron 3 of 8)	305246	NM_028296	72605	Mm.342160	NM_028296	ENSMUSG00000056158	Car10	2700029L05Rik|BB085816|Ca10	carbonic anhydrase 10	protein-coding
13963	chr17	33982072	33982572	non-coding (NR_033305, exon 1 of 1)	non-coding (NR_033305, exon 1 of 1)	830	NR_033305	433100	Mm.380381	NM_001013793		AA388235	-	expressed sequence AA388235	ncRNA
14015	chr17	34948685	34949185	Intergenic	B1_Mur4|SINE|Alu	2073	NR_028527	100217427		NR_028527	ENSMUSG00000093009	Snord52	MBII-297	small nucleolar RNA, C/D box 52	snoRNA
14155	chr17	43518615	43519115	Intergenic	Intergenic	-16092	NM_008585	17287	Mm.5346	NM_008585	ENSMUSG00000023914	Mep1a	AI098089|AW107200|Mep-1|Mep-1a|Mep1	meprin 1 alpha	protein-coding
22466	chr4	102859290	102859790	intron (NM_001285860, intron 2 of 22)	ORR1D1|LTR|ERVL-MaLR	99405	NM_001285862	73094	Mm.54201	NM_144906	ENSMUSG00000028524	Sgip1	3110007P09Rik|SGIP1alpha|gag	SH3-domain GRB2-like (endophilin) interacting protein 1	protein-coding
10083	chr14	55497258	55497789	intron (NM_001024645, intron 17 of 39)	intron (NM_001024645, intron 17 of 39)	6430	NM_001024645	268747	Mm.151577	NM_001024645	ENSMUSG00000022211	Lrrc16b	mFLJ00240	leucine rich repeat containing 16B	protein-coding
31183	chr8	73353385	73353885	Intergenic	CpG	-1079	NM_010687	16795	Mm.324371	NM_010687	ENSMUSG00000004383	Large	BPFD#36|Gyltl1a|Mbp-1|Mbp1|enr|fg|froggy|mKIAA0609|myd	like-glycosyltransferase	protein-coding
25014	chr5	109842450	109842950	Intergenic	RLTR13D6|LTR|ERVK	-8558	NR_027964	667213	Mm.454429	NR_027964		Gm10416	EG667213|ENSMUSG00000072761	zinc finger protein pseudogene	pseudo
14280	chr17	47440261	47440761	intron (NM_145489, intron 1 of 4)	intron (NM_145489, intron 1 of 4)	-3136	NM_029296	75462	Mm.46129	NM_029296	ENSMUSG00000047150	1700001C19Rik	-	RIKEN cDNA 1700001C19 gene	protein-coding
28050	chr7	6258176	6258676	intron (NM_001177416, intron 3 of 11)	intron (NM_001177416, intron 3 of 11)	2504	NM_001177417	627821	Mm.99441	NM_001177416	ENSMUSG00000053367	Gm6792	EG627821	predicted gene 6792	protein-coding
8162	chr13	21861543	21862043	Intergenic	Intergenic	28050	NM_001110555	665622	Mm.471247	NM_001110555		Hist1h2br	Gm11277|OTTMUSG00000000449	histone cluster 1 H2br	protein-coding
27871	chr6	143373638	143374139	Intergenic	RMER1A|Other|Other	128000	NR_027803	52285	Mm.354898	NM_001033129		D6Ertd474e	1700001I24Rik|AU023129	DNA segment, Chr 6, ERATO Doi 474, expressed	ncRNA
4886	chr11	67001734	67002234	Intergenic	Intergenic	-23170	NM_177392	338369	Mm.128138	NM_177392	ENSMUSG00000050270	Tmem220	-	transmembrane protein 220	protein-coding
13742	chr17	28341039	28341539	intron (NM_011566, intron 2 of 12)	CpG	9057	NM_001204156	21678	Mm.6655	NM_011566	ENSMUSG00000002249	Tead3	DTEF-1|ETFR-1|TEAD-3|TEF-5|Tcf13r2	TEA domain family member 3	protein-coding
14093	chr17	35996894	35997396	intron (NR_015618, intron 1 of 1)	intron (NR_015618, intron 1 of 1)	2641	NR_015618	77810	Mm.483143	NR_015618		A930015D03Rik	-	RIKEN cDNA A930015D03 gene	ncRNA
13961	chr17	33978587	33979087	promoter-TSS (NR_004446)	promoter-TSS (NR_004446)	-46	NR_004446	630499	Mm.440940	NM_001081015		H2-K2	EG630499|Gm7035|H-2K1|H-2K1K|H-2K2|H2-K1	histocompatibility 2, K region locus 2	pseudo
14117	chr17	37078825	37079325	Intergenic	Intergenic	7161	NM_146477	258469	Mm.271392	NM_146477	ENSMUSG00000056600	Olfr90	MOR256-21|bM573K1.2	olfactory receptor 90	protein-coding
13925	chr17	32951417	32951917	non-coding (NR_033585, exon 3 of 3)	non-coding (NR_033585, exon 3 of 3)	-4306	NM_130882	170716	Mm.254838	NM_130882	ENSMUSG00000024055	Cyp4f13	0610030I10Rik|Cypf13	cytochrome P450, family 4, subfamily f, polypeptide 13	protein-coding
13992	chr17	34411058	34411558	intron (NM_001001177, intron 1 of 19)	intron (NM_001001177, intron 1 of 19)	12488	NM_001001177	407788	Mm.73205	NM_001001177	ENSMUSG00000057246	BC051142	NG8|TSBP|Tesb|Tesbp	cDNA sequence BC051142	protein-coding
14103	chr17	36271187	36271687	promoter-TSS (NM_178281)	promoter-TSS (NM_178281)	-4	NM_178281	79263	Mm.40624	NM_024468	ENSMUSG00000045409	Trim39	1100001D15Rik|E130103K13Rik|RBCC-B30.2|Rnf23|mKIAA4179|tfp	tripartite motif-containing 39	protein-coding
20725	chr3	95920533	95921033	Intergenic	RMER17A2|LTR|ERVK	-8474	NM_001253757	66471	Mm.218657	NM_023210	ENSMUSG00000015749	Anp32e	2810018A15Rik|AI047746|AI326868|CPD1|LANP-L|LANPL|mLANP-L	acidic (leucine-rich) nuclear phosphoprotein 32 family, member E	protein-coding
14289	chr17	47593208	47593708	promoter-TSS (NM_007632)	promoter-TSS (NM_007632)	-9	NM_007632	12445	Mm.27291	NM_007632	ENSMUSG00000034165	Ccnd3	9230106B05Rik|AA682053|AL024085|AW146355|C78795	cyclin D3	protein-coding
14089	chr17	35969586	35970086	promoter-TSS (NM_013854)	promoter-TSS (NM_013854)	-86	NM_013854	224742	Mm.329022	NM_013854	ENSMUSG00000038762	Abcf1	AU041969|Abc50|D17Wsu166e|GCN20	ATP-binding cassette, sub-family F (GCN20), member 1	protein-coding
5467	chr11	87448680	87449180	intron (NM_031386, intron 2 of 30)	intron (NM_031386, intron 2 of 30)	21339	NM_001199293	83560	Mm.440758	NM_031386	ENSMUSG00000010342	Tex14	C85585	testis expressed gene 14	protein-coding
2894	chr10	67053365	67053865	intron (NM_001204915, intron 2 of 8)	intron (NM_001204915, intron 2 of 8)	43373	NM_178606	28193	Mm.41272	NM_178606	ENSMUSG00000019873	Reep3	D10Ucla1	receptor accessory protein 3	protein-coding
683	chr1	73088395	73088895	Intergenic	Intergenic	64059	NR_038002	69449	Mm.250447	NR_038001		1700027A15Rik	-	RIKEN cDNA 1700027A15 gene	ncRNA
29914	chr7	125581348	125581848	Intergenic	Intergenic	-21831	NM_021887	60504	Mm.155643	NM_021887	ENSMUSG00000030745	Il21r	NILR	interleukin 21 receptor	protein-coding
13741	chr17	28328246	28328746	promoter-TSS (NM_011287)	promoter-TSS (NM_011287)	25	NM_011287	19896	Mm.336955	NM_011287	ENSMUSG00000037805	Rpl10a	CsA-19|Nedd6	ribosomal protein L10A	protein-coding
14248	chr17	46646020	46646520	promoter-TSS (NM_025302)	promoter-TSS (NM_025302)	22	NM_025302	27398	Mm.391007	NM_025302	ENSMUSG00000002767	Mrpl2	CGI-22|MRP-L14|Rpml14	mitochondrial ribosomal protein L2	protein-coding
29910	chr7	125469903	125470403	intron (NM_026330, intron 5 of 7)	intron (NM_026330, intron 5 of 7)	21389	NM_026330	67711	Mm.4467	NM_026330	ENSMUSG00000030750	Nsmce1	2510027N19Rik	non-SMC element 1 homolog (S. cerevisiae)	protein-coding
28260	chr7	19506248	19506748	3' UTR (NM_177692, exon 2 of 2)	3' UTR (NM_177692, exon 2 of 2)	1833	NM_177692	232946	Mm.64557	NM_177692	ENSMUSG00000057667	Bloc1s3	BC043666|Blos3|E230011O18|rp	biogenesis of lysosomal organelles complex-1, subunit 3	protein-coding
25015	chr5	109844844	109845344	Intergenic	Intergenic	-10952	NR_027964	667213	Mm.454429	NR_027964		Gm10416	EG667213|ENSMUSG00000072761	zinc finger protein pseudogene	pseudo
28467	chr7	28299182	28299682	intron (NM_007866, intron 3 of 8)	intron (NM_007866, intron 3 of 8)	2353	NM_007866	13389	Mm.12896	NM_007866	ENSMUSG00000003436	Dll3	pu|pudgy	delta-like 3 (Drosophila)	protein-coding
14102	chr17	36243820	36244320	Intergenic	B2_Mm1t|SINE|B2	13776	NM_026308	67676	Mm.27131	NM_026308		Rpp21	0610037N01Rik	ribonuclease P 21 subunit	protein-coding
14228	chr17	46282857	46283357	promoter-TSS (NM_028751)	promoter-TSS (NM_028751)	-81	NM_001252474	74094	Mm.284594	NM_028751	ENSMUSG00000012296	Tjap1	0610041D19Rik|AI415281|AW121008|Pilt|Tjp4	tight junction associated protein 1	protein-coding
21796	chr4	38002556	38003056	Intergenic	MMERVK9E_I-int|LTR|ERVK	-1051062	NM_001165999	242384	Mm.132507	NM_175516	ENSMUSG00000045083	Lingo2	B230217C06Rik|Lern3|Lrrn6c	leucine rich repeat and Ig domain containing 2	protein-coding
10605	chr14	108913626	108914126	5' UTR (NM_199065, exon 1 of 1)	5' UTR (NM_199065, exon 1 of 1)	363	NM_199065	76965	Mm.257268	NM_199065	ENSMUSG00000075478	Slitrk1	3200001I04Rik	SLIT and NTRK-like family, member 1	protein-coding
14066	chr17	35667329	35667829	promoter-TSS (NM_175137)	promoter-TSS (NM_175137)	13	NM_175137	68915	Mm.32002	NM_175137	ENSMUSG00000038838	Vars2	1190004I24Rik|Vars2l|mKIAA1885	valyl-tRNA synthetase 2, mitochondrial (putative)	protein-coding
19887	chr3	20044750	20045250	Intergenic	Intergenic	-9690	NM_080634	12807	Mm.291533	NM_080634	ENSMUSG00000027615	Hps3	coa	Hermansky-Pudlak syndrome 3 homolog (human)	protein-coding
29638	chr7	108196243	108196743	Intergenic	MMERVK9C_I-int|LTR|ERVK	16034	NM_001011811	258042	Mm.377337	NM_001011811	ENSMUSG00000095929	Olfr487	MOR204-29P|MOR204-31P|Olfr1538-ps1	olfactory receptor 487	protein-coding
13930	chr17	33092227	33092727	intron (NM_001024950, intron 1 of 3)	intron (NM_001024950, intron 1 of 3)	3110	NM_001024950	240068	Mm.121392	NM_001024950		Zfp563	D10628|D130054H01|NTfin7|Zfp413	zinc finger protein 563	protein-coding
16775	chr19	51431464	51431964	Intergenic	Intergenic	-753068	NM_021377	58178	Mm.313672	NM_021377	ENSMUSG00000043531	Sorcs1	Sorcs|mSorCS	VPS10 domain receptor protein SORCS 1	protein-coding
19031	chr2	152820300	152820800	intron (NM_001289717, intron 2 of 2)	intron (NM_001289717, intron 2 of 2)	10167	NM_001289716	12048	Mm.238213	NM_009743	ENSMUSG00000007659	Bcl2l1	Bcl(X)L|Bcl-XL|Bcl2l|BclX|bcl-x|bcl2-L-1	BCL2-like 1	protein-coding
14717	chr17	83320409	83320909	Intergenic	L4_C_Mam|LINE|RTE-X	-30272	NM_001114362	78798	Mm.295565	NM_199466	ENSMUSG00000032624	Eml4	4930443C24Rik|AI644019	echinoderm microtubule associated protein like 4	protein-coding
14086	chr17	35918836	35919348	intron (NM_001163818, intron 1 of 18)	intron (NM_001163818, intron 1 of 18)	1203	NR_035445	100316810		NR_035445	miRBase:MI0008326	Mir1894	Mirn1894|mmu-mir-1894	microRNA 1894	ncRNA
7090	chr12	69790510	69791010	promoter-TSS (NM_183294)	promoter-TSS (NM_183294)	-53	NM_183294	71091	Mm.132325	NM_183294	ENSMUSG00000020990	Cdkl1	4933411O17Rik	cyclin-dependent kinase-like 1 (CDC2-related kinase)	protein-coding
28685	chr7	36644196	36644696	Intergenic	BGLII_Mur|LTR|ERVK	-53672	NM_172298	243931	Mm.44141	NM_172298	ENSMUSG00000021217	Tshz3	A630038G13Rik|Tsh3|Zfp537|mKIAA1474|teashirt3	teashirt zinc finger family member 3	protein-coding
13952	chr17	33890540	33891040	promoter-TSS (NM_001195298)	promoter-TSS (NM_001195298)	-157	NM_001195298	100502766	Mm.335713	NM_001195298	ENSMUSG00000079553	Kifc1	100042970|Gm4137|HSET|KNSL2|Kifc5a|Knsl2a|Tctex-7|Tctex-7A|Tctex7|Tctex7a	kinesin family member C1	protein-coding
10834	chr15	18052683	18053183	Intergenic	Intergenic	316694	NR_045711	70886	Mm.399021	NR_045711		4921515E04Rik	-	RIKEN cDNA 4921515E04 gene	ncRNA
3633	chr10	117432293	117432793	Intergenic	LTR50|LTR|ERVL	-55570	NM_001013391	432508	Mm.478881	NM_001013391	ENSMUSG00000055531	Cpsf6	4733401N12Rik|AI256641|CFIM|CFIM68|HPBRII-4|HPBRII-7	cleavage and polyadenylation specific factor 6	protein-coding
13954	chr17	33915767	33916267	promoter-TSS (NM_020625)	promoter-TSS (NM_020625)	-159	NM_020625	81630	Mm.482096	NM_020625	ENSMUSG00000051390	Zbtb22	1110008J20Rik|AI265210|AI415166|Bing1|Zfp297	zinc finger and BTB domain containing 22	protein-coding
922	chr1	88995807	88996307	Intergenic	Intergenic	-20056	NR_040471	73475	Mm.491040	NR_040471		1700067G17Rik	-	RIKEN cDNA 1700067G17 gene	ncRNA
14108	chr17	36836863	36837363	promoter-TSS (NM_001286726)	promoter-TSS (NM_001286726)	-33	NM_001286727	22670	Mm.34587	NM_030698	ENSMUSG00000024457	Trim26	AI462198|Zfp173|Zfp1736	tripartite motif-containing 26	protein-coding
14226	chr17	46247817	46248317	promoter-TSS (NM_009085)	promoter-TSS (NM_009085)	-13	NM_145353	28064	Mm.248769	NM_145353	ENSMUSG00000071074	Yipf3	C6orf109|D17Wsu94e|KLIP1	Yip1 domain family, member 3	protein-coding
14250	chr17	46680726	46681226	promoter-TSS (NM_001163729)	promoter-TSS (NM_001163729)	-10	NM_001277309	17256	Mm.329083	NM_010787	ENSMUSG00000002768	Mea1	Mea-1	male enhanced antigen 1	protein-coding
15348	chr18	39910894	39911395	Intergenic	Intergenic	137647	NM_011033	18459	Mm.9493	NM_011033	ENSMUSG00000051732	Pabpc2	Pabp|Pabp+|Pabp2	poly(A) binding protein, cytoplasmic 2	protein-coding
14184	chr17	45506656	45507156	promoter-TSS (NM_198608)	promoter-TSS (NM_198608)	65	NM_198608	224805	Mm.329063	NM_198608	ENSMUSG00000023938	Aars2	Aarsl|AlaRS|Gm89	alanyl-tRNA synthetase 2, mitochondrial (putative)	protein-coding
14273	chr17	47139693	47140193	promoter-TSS (NM_001097623)	promoter-TSS (NM_001097623)	-999	NM_001097623	224829	Mm.260989	NM_172622	ENSMUSG00000064043	Trerf1	9430096I18Rik|AI429294|B830015H24|RAPA|Trep-132|Trep132	transcriptional regulating factor 1	protein-coding
14123	chr17	37995569	37996069	Intergenic	Intergenic	-42797	NM_001011829	258094	Mm.377348	NM_001011829	ENSMUSG00000071084	Olfr761	MOR218-12|MOR218-5P|MOR218-6P|Olfr1552-ps1	olfactory receptor 761	protein-coding
26852	chr6	73889065	73889565	Intergenic	RMER20B|LTR|ERVK	-418294	NR_108032	73408	Mm.233629	NR_108032		1700065L07Rik	-	RIKEN cDNA 1700065L07 gene	ncRNA
25303	chr5	119055408	119055908	Intergenic	Intergenic	-52578	NR_040693	73477	Mm.410863	NR_040693		1700081H04Rik	-	RIKEN cDNA 1700081H04 gene	ncRNA
32624	chr9	38407445	38407945	Intergenic	RLTR13D6|LTR|ERVK	5984	NM_146869	258869	Mm.335067	NM_146869	ENSMUSG00000049098	Olfr147	M3|MOR164-1	olfactory receptor 147	protein-coding
26504	chr6	43208554	43209054	Intergenic	RMER15|LTR|ERVL	7158	NM_146653	258647	Mm.377612	NM_146653	ENSMUSG00000048693	Olfr435	MOR261-5	olfactory receptor 435	protein-coding
25730	chr5	136881349	136881849	intron (NM_024474, intron 1 of 12)	CpG	1508	NM_024474	140709	Mm.295020	NM_024474	ENSMUSG00000004415	Col26a1	9430032K24Rik|BC002218|Col26a|Emid2|Emu2	collagen, type XXVI, alpha 1	protein-coding
13931	chr17	33358582	33359126	promoter-TSS (NM_207541)	promoter-TSS (NM_207541)	24	NM_207541	224694	Mm.170029	NM_207541		Zfp81	AA409460|AA409461|C330034P10Rik|D330034E10Rik|Hszfp36|KRAB13|Zfp78	zinc finger protein 81	protein-coding
14114	chr17	36951494	36951994	promoter-TSS (NM_029632)	promoter-TSS (NM_029632)	48	NM_029632	76497	Mm.46176	NM_029632	ENSMUSG00000036398	Ppp1r11	1500041B02Rik|AV117883|Hcgv|Tcte5|Tctex-5|Tctex5	protein phosphatase 1, regulatory (inhibitor) subunit 11	protein-coding
13748	chr17	28486002	28486502	promoter-TSS (NM_010220)	promoter-TSS (NM_010220)	-103	NM_010220	14229	Mm.276405	NM_010220	ENSMUSG00000024222	Fkbp5	D17Ertd592e|Dit1|FKBP-5|FKBP51	FK506 binding protein 5	protein-coding
14099	chr17	36114122	36114622	Intergenic	Intergenic	-2696	NM_001271005	667803	Mm.477808	NM_001271005		C920025E04Rik	-	RIKEN cDNA C920025E04 gene	protein-coding
13946	chr17	33810176	33810676	promoter-TSS (NM_030697)	promoter-TSS (NM_030697)	-97	NM_030697	80880	Mm.196330	NM_030697	ENSMUSG00000042099	Kank3	0610013D04Rik|Ankrd47|D17Ertd288e|NG28	KN motif and ankyrin repeat domains 3	protein-coding
14003	chr17	34646873	34647373	promoter-TSS (NM_017406)	promoter-TSS (NM_017406)	-23	NM_017406	12915	Mm.4068	NM_017406	ENSMUSG00000015461	Atf6b	AA617266|ATF6beta|Creb-rp|Crebl1	activating transcription factor 6 beta	protein-coding
14189	chr17	45551991	45552491	Intergenic	Intergenic	-2564	NM_001013749	210573	Mm.329064	NM_001013749	ENSMUSG00000096847	Tmem151b	Gm323	transmembrane protein 151B	protein-coding
6681	chr12	19288272	19288772	Intergenic	CpG	774012	NM_001033157	236366	Mm.352227	NM_001033157		5730507C01Rik	-	RIKEN cDNA 5730507C01 gene	protein-coding
16563	chr19	42279585	42280085	TTS (NR_037246)	TTS (NR_037246)	335	NR_037246	100526549		NR_037246	miRBase:MI0014048	Mir3085	mmu-mir-3085	microRNA 3085	ncRNA
13996	chr17	34587264	34587764	exon (NM_010929, exon 30 of 30)	exon (NM_010929, exon 30 of 30)	-2292	NM_134116	106512	Mm.26584	NM_134116	ENSMUSG00000034786	Gpsm3	AA960287|AGS4	G-protein signalling modulator 3 (AGS3-like, C. elegans)	protein-coding
14264	chr17	46890157	46890657	promoter-TSS (NM_178385)	promoter-TSS (NM_178385)	-214	NM_178385	72726	Mm.33780	NM_178385	ENSMUSG00000036430	Tbcc	2810055C19Rik	tubulin-specific chaperone C	protein-coding
14716	chr17	83277616	83278116	Intergenic	Intergenic	62583	NM_134117	106522	Mm.311974	NM_134117	ENSMUSG00000024247	Pkdcc	AI115348|AW548124|Adtk1|ESTM17|MAd1|Sgk493|Vlk|X83346	protein kinase domain containing, cytoplasmic	protein-coding
33461	chr9	78473419	78473919	intron (NM_026658, intron 11 of 11)	PB1|SINE|Alu	8055	NM_010106	13627	Mm.138471	NM_010106	ENSMUSG00000037742	Eef1a1	-	eukaryotic translation elongation factor 1 alpha 1	protein-coding
7815	chr12	111670251	111670751	intron (NM_021273, intron 5 of 7)	intron (NM_021273, intron 5 of 7)	1837	NM_021273	12709	Mm.16831	NM_021273	ENSMUSG00000001270	Ckb	B-CK|Bck|Ck-3|Ck3|Ckbb	creatine kinase, brain	protein-coding
6900	chr12	49391420	49391920	intron (NR_026733, intron 2 of 2)	CpG	2018	NR_026733	67293	Mm.185800	NR_026733	ENSMUSG00000089922	3110039M20Rik	-	RIKEN cDNA 3110039M20 gene	ncRNA
14058	chr17	35548552	35549052	Intergenic	Intergenic	-3326	NM_001008424	386463	Mm.426664	NM_001008424	ENSMUSG00000039518	Cdsn	AI747712	corneodesmosin	protein-coding
6574	chr12	7978400	7978900	intron (NM_009693, intron 2 of 28)	intron (NM_009693, intron 2 of 28)	973	NM_009693	238055	Mm.221239	NM_009693	ENSMUSG00000020609	Apob	AI315052|Apo B-100|apob-100|apob-48	apolipoprotein B	protein-coding
20866	chr3	103188339	103188839	Intergenic	Intergenic	-5234	NR_106164	102466254		NR_106164		Mir3473f	mmu-mir-3473f	microRNA mir-3473f	ncRNA
14028	chr17	35135198	35135698	promoter-TSS (NM_001252469)	promoter-TSS (NM_001252469)	-266	NM_001252469	224727	Mm.203962	NM_057171	ENSMUSG00000024392	Bag6	2410045D21Rik|AA408914|BAG-6|Bat3|D17H6S52E|G3|Scythe	BCL2-associated athanogene 6	protein-coding
14294	chr17	47694797	47695297	promoter-TSS (NM_144939)	promoter-TSS (NM_144939)	-160	NM_144939	107971	Mm.392206	NM_144939	ENSMUSG00000023266	Frs3	4930417B13Rik|AI449674|Frs2beta|Snt2	fibroblast growth factor receptor substrate 3	protein-coding
14237	chr17	46511034	46511534	exon (NM_001081335, exon 28 of 41)	exon (NM_001081335, exon 28 of 41)	14495	NM_207161	381101	Mm.35801	NM_207161	ENSMUSG00000040658	Dnph1	C76683|Rcl	2'-deoxynucleoside 5'-phosphate N-hydrolase 1	protein-coding
14440	chr17	56487575	56488075	Intergenic	Intergenic	-11345	NM_011218	19280	Mm.258771	NM_011218	ENSMUSG00000013236	Ptprs	AL022616|PTP|PTP-NU3|PTPNU-3|PTPsigma|Ptpt9|R-PTP-S|RPTPsigma	protein tyrosine phosphatase, receptor type, S	protein-coding
14181	chr17	45433464	45433964	promoter-TSS (NM_152810)	promoter-TSS (NM_152810)	-7	NM_152810	71702	Mm.28270	NM_152810	ENSMUSG00000023932	Cdc5l	1200002I02Rik|AA408004|PCDC5RP	cell division cycle 5-like (S. pombe)	protein-coding
14179	chr17	45374126	45374626	Intergenic	Intergenic	59331	NM_152810	71702	Mm.28270	NM_152810	ENSMUSG00000023932	Cdc5l	1200002I02Rik|AA408004|PCDC5RP	cell division cycle 5-like (S. pombe)	protein-coding
19860	chr3	17786574	17787074	Intergenic	CpG	-3097	NR_033490	70441	Mm.458192	NR_033490		2610100L16Rik	100040120|Gm2612	RIKEN cDNA 2610100L16 gene	ncRNA
16488	chr19	38431765	38432265	Intergenic	ORR1B1|LTR|ERVL-MaLR	36035	NM_175507	240660	Mm.262085	NM_175507	ENSMUSG00000044026	Slc35g1	AA590464|D330039I19Rik|Tmem20	solute carrier family 35, member G1	protein-coding
14194	chr17	45584843	45585343	TTS (NM_001199114)	TTS (NM_001199114)	7300	NM_022880	63959	Mm.29744	NM_022880	ENSMUSG00000023942	Slc29a1	1200014D21Rik|AA407560|ENT1	solute carrier family 29 (nucleoside transporters), member 1	protein-coding
26262	chr6	24197463	24197963	Intergenic	RLTR13E|LTR|ERVK	-29621	NM_019481	55961	Mm.19299	NM_019481	ENSMUSG00000029700	Slc13a1	AI314066|AI987826|NaSi-1|Nas1	solute carrier family 13 (sodium/sulfate symporters), member 1	protein-coding
13718	chr17	27909064	27909564	promoter-TSS (NM_181413)	promoter-TSS (NM_181413)	8	NM_181413	224650	Mm.32556	NM_181413	ENSMUSG00000024219	Anks1	Anks1a|mKIAA0229	ankyrin repeat and SAM domain containing 1	protein-coding
17172	chr2	24474064	24474564	intron (NM_011040, intron 2 of 11)	CpG	1285	NM_011040	18510	Mm.2533	NM_011040	ENSMUSG00000026976	Pax8	Pax-8	paired box 8	protein-coding
8155	chr13	21530849	21531349	promoter-TSS (NM_001251834)	promoter-TSS (NM_001251834)	15	NM_001251834	93681	Mm.290601	NM_139141	ENSMUSG00000063894	Zkscan8	2510038J07Rik|D430019P06Rik|LD5-1|Zfp192	zinc finger with KRAB and SCAN domains 8	protein-coding
22257	chr4	78513295	78513795	Intergenic	IAPEz-int|LTR|ERVK	-301650	NM_011211	19266	Mm.184021	NM_011211	ENSMUSG00000028399	Ptprd	1110002J03Rik|3000002J10Rik|B230219D21Rik|R-PTP-delta	protein tyrosine phosphatase, receptor type, D	protein-coding
13976	chr17	34152844	34153344	promoter-TSS (NM_010387)	promoter-TSS (NM_010387)	-97	NM_010387	14999	Mm.460938	NM_010387	ENSMUSG00000079547	H2-DMb1	AI385589|H-2Mb1|H2-Mb1	histocompatibility 2, class II, locus Mb1	protein-coding
20415	chr3	85748828	85749328	Intergenic	ORR1E-int|LTR|ERVL-MaLR	-2869	NM_172682	229488	Mm.119926	NM_172682	ENSMUSG00000051000	Fam160a1	9930021J17Rik	family with sequence similarity 160, member A1	protein-coding
15282	chr18	37442108	37442608	promoter-TSS (NM_053138)	promoter-TSS (NM_053138)	-159	NM_053138	93884	Mm.196700	NM_053138	ENSMUSG00000047307	Pcdhb13	Pcdbh6|PcdhbM	protocadherin beta 13	protein-coding
10792	chr15	10952013	10952513	promoter-TSS (NM_001204134)	promoter-TSS (NM_001204134)	-69	NM_030888	81799	Mm.280158	NM_030888	ENSMUSG00000058914	C1qtnf3	2310005P21Rik|CORS-26|CORS26|CTRP3|Corcs|Cors	C1q and tumor necrosis factor related protein 3	protein-coding
14173	chr17	44776800	44777300	promoter-TSS (NM_178652)	promoter-TSS (NM_178652)	-121	NM_178652	109115	Mm.431327	NM_178652	ENSMUSG00000038954	Supt3	2310066G22Rik|AI315192|SPT3|SPT3L|Supt3h	suppressor of Ty 3	protein-coding
14022	chr17	35046623	35047123	promoter-TSS (NM_013600)	promoter-TSS (NM_013600)	-150	NM_001146215	17687	Mm.24192	NM_013600	ENSMUSG00000007035	Msh5	G7|Mut5	mutS homolog 5 (E. coli)	protein-coding
14292	chr17	47629329	47629829	Intergenic	CpG	-1111	NM_198421	224836	Mm.59393	NM_198421		Usp49	C330046L10Rik|Gm545	ubiquitin specific peptidase 49	protein-coding
13796	chr17	29490273	29490788	promoter-TSS (NM_008842)	promoter-TSS (NM_008842)	-515	NM_008842	18712	Mm.405293	NM_008842		Pim1	Pim-1	proviral integration site 1	protein-coding
13909	chr17	32483227	32483727	intron (NM_177307, intron 8 of 13)	intron (NM_177307, intron 8 of 13)	-22985	NM_001101445	208285	Mm.311422	NM_001101445	ENSMUSG00000091586	Cyp4f17	EG208285	cytochrome P450, family 4, subfamily f, polypeptide 17	protein-coding
13780	chr17	29268622	29269122	promoter-TSS (NM_030561)	promoter-TSS (NM_030561)	84	NM_030561	80748	Mm.290116	NM_030561	ENSMUSG00000052712	BC004004	2400006G15Rik	cDNA sequence BC004004	protein-coding
12195	chr16	3632901	3633401	Intergenic	RLTR46B|LTR|ERVK	40753	NM_146860	258859	Mm.377723	NM_146860	ENSMUSG00000051003	Olfr161	MOR131-1|OR912-47M6	olfactory receptor 161	protein-coding
13950	chr17	33842876	33843376	promoter-TSS (NM_019421)	promoter-TSS (NM_019421)	35	NM_019421	54219	Mm.11175	NM_019421	ENSMUSG00000002308	Cd320	425O18-1|8D6|CD320-002|D17Ertd716e|NG29|VLDL	CD320 antigen	protein-coding
22910	chr4	125498831	125499333	intron (NM_001081097, intron 1 of 15)	MER5A|DNA|hAT-Charlie	-5667	NR_035409	100124641		NR_035409		Mir692-2b	Mirn692-2b	microRNA 692-2b	ncRNA
17861	chr2	68249997	68250497	intron (NM_016866, intron 16 of 17)	intron (NM_016866, intron 16 of 17)	145575	NM_020283	26877	Mm.226435	NM_020283	ENSMUSG00000034780	B3galt1	beta3Gal-T1	UDP-Gal:betaGlcNAc beta 1,3-galactosyltransferase, polypeptide 1	protein-coding
13966	chr17	34031475	34031975	promoter-TSS (NM_001077709)	promoter-TSS (NM_001077709)	-35	NM_008202	14977	Mm.18556	NM_008202	ENSMUSG00000024327	Slc39a7	AA408174|AI117660|AL024048|H-2Ke4|H2-Ke4|Ke-4|Ke4|Ring5|Zip7	solute carrier family 39 (zinc transporter), member 7	protein-coding
13956	chr17	33929331	33929831	promoter-TSS (NM_009059)	promoter-TSS (NM_009059)	-313	NM_009059	19732	Mm.43777	NM_009059	ENSMUSG00000041354	Rgl2	KE1.5|Rab2l|Rgt2|Rlf	ral guanine nucleotide dissociation stimulator-like 2	protein-coding
15350	chr18	40233465	40233965	Intergenic	RLTR13G|LTR|ERVK	-14316	NM_023311	67180	Mm.270382	NM_023311	ENSMUSG00000024487	Yipf5	2610311I19Rik|AA408236|Yip1a	Yip1 domain family, member 5	protein-coding
13913	chr17	32528653	32529153	TTS (NM_001101445)	TTS (NM_001101445)	-7726	NM_024442	70101	Mm.30504	NM_024442	ENSMUSG00000048440	Cyp4f16	2310021J05Rik|AI746515	cytochrome P450, family 4, subfamily f, polypeptide 16	protein-coding
166	chr1	19233838	19234338	exon (NM_001286340, exon 7 of 8)	exon (NM_001286340, exon 7 of 8)	22034	NM_001025305	21419	Mm.137021	NM_009334	ENSMUSG00000025927	Tfap2b	AI606113|AP-2(beta)|E130018K07Rik|Tcfap2b	transcription factor AP-2 beta	protein-coding
9711	chr14	27564065	27564565	Intergenic	IAPLTR3-int|LTR|ERVK	-55855	NM_177111	320234	Mm.247767	NM_177111	ENSMUSG00000046753	Ccdc66	E230015L20Rik	coiled-coil domain containing 66	protein-coding
14191	chr17	45573107	45573607	promoter-TSS (NM_008302)	promoter-TSS (NM_008302)	-96	NM_008302	15516	Mm.2180	NM_008302	ENSMUSG00000023944	Hsp90ab1	90kDa|AL022974|C81438|Hsp84|Hsp84-1|Hsp90|Hspcb	heat shock protein 90 alpha (cytosolic), class B member 1	protein-coding
5979	chr11	102558055	102558555	Intergenic	ORR1C2|LTR|ERVL-MaLR	-2147	NM_001159492	237943	Mm.260282	NM_001159492	ENSMUSG00000034621	Gpatch8	5430405G24Rik|AU018890|ENSMUSG00000075516|Fbm1|Gpatc8|mKIAA0553	G patch domain containing 8	protein-coding
13754	chr17	28704996	28705496	intron (NM_001168514, intron 2 of 12)	intron (NM_001168514, intron 2 of 12)	12678	NM_001168513	26416	Mm.311337	NM_011951	ENSMUSG00000053436	Mapk14	CSBP2|Crk1|Csbp1|Mxi2|PRKM14|PRKM15|p38|p38-alpha|p38MAPK|p38a|p38alpha	mitogen-activated protein kinase 14	protein-coding
20429	chr3	86612473	86612973	intron (NM_001077687, intron 42 of 50)	ORR1D1|LTR|ERVL-MaLR	-64440	NM_011839	23937	Mm.389466	NM_011839	ENSMUSG00000057777	Mab21l2	-	mab-21-like 2 (C. elegans)	protein-coding
33039	chr9	58247009	58247509	exon (NM_008884, exon 2 of 8)	exon (NM_008884, exon 2 of 8)	2527	NM_178087	18854	Mm.392123	NM_008884	ENSMUSG00000036986	Pml	1200009E24Rik|AI661194|Trim19	promyelocytic leukemia	protein-coding
13803	chr17	29660399	29660899	promoter-TSS (NM_028791)	promoter-TSS (NM_028791)	48	NM_028791	74157	Mm.475060	NM_028791		Cmtr1	1300018I05Rik|AI451264|Ftsjd2|MTr1|mKIAA0082	cap methyltransferase 1	protein-coding
14091	chr17	35993617	35994117	promoter-TSS (NR_015618)	promoter-TSS (NR_015618)	-637	NR_015618	77810	Mm.483143	NR_015618		A930015D03Rik	-	RIKEN cDNA A930015D03 gene	ncRNA
27189	chr6	94464547	94465047	Intergenic	Intergenic	-35517	NM_026255	67582	Mm.280725	NM_026255	ENSMUSG00000045100	Slc25a26	4930433D19Rik|4933433F13Rik|AW557176|D6Bwg0781e|Slc25a6	solute carrier family 25 (mitochondrial carrier, phosphate carrier), member 26	protein-coding
2464	chr10	30295851	30296351	Intergenic	RLTR9D|LTR|ERVK	-95561	NM_001109747	66311	Mm.251779	NM_001109747	ENSMUSG00000075266	Cenpw	2610036L11Rik|Cug2	centromere protein W	protein-coding
13744	chr17	28368435	28368935	Intergenic	Intergenic	-3542	NM_021478	22157	Mm.42102	NM_021478	ENSMUSG00000037446	Tulp1	Tulp1l	tubby like protein 1	protein-coding
8156	chr13	21716010	21716510	promoter-TSS (NM_178199)	promoter-TSS (NM_178199)	-117	NM_178199	319185		NM_178199	ENSMUSG00000094338	Hist1h2bl	H2b-291a	histone cluster 1, H2bl	protein-coding
14164	chr17	44105775	44106275	promoter-TSS (NM_199016)	promoter-TSS (NM_199016)	-217	NM_199016	224794	Mm.255971	NM_199016	ENSMUSG00000023961	Enpp4	4933413N07Rik|AA986363|AI195364|E-NPP 4|Gm90|mKIAA0879	ectonucleotide pyrophosphatase/phosphodiesterase 4	protein-coding
6880	chr12	44640456	44640956	Intergenic	L1_Mus4|LINE|L1	311821	NM_001146031	319504	Mm.208439	NM_176930	ENSMUSG00000020598	Nrcam	Bravo|C030017F07Rik|C130076O07Rik|mKIAA0343	neuron-glia-CAM-related cell adhesion molecule	protein-coding
16926	chr2	4142150	4142650	Intergenic	Intergenic	-1259	NR_040500	73489	Mm.488103	NR_040500	ENSMUSG00000084859	1700080N15Rik	4933408D14Rik	RIKEN cDNA 1700080N15 gene	ncRNA
13911	chr17	32494534	32495034	Intergenic	Intergenic	-11678	NM_001101445	208285	Mm.311422	NM_001101445	ENSMUSG00000091586	Cyp4f17	EG208285	cytochrome P450, family 4, subfamily f, polypeptide 17	protein-coding
31251	chr8	80055821	80056321	intron (NM_020259, intron 1 of 12)	intron (NM_020259, intron 1 of 12)	1937	NM_020259	15245	Mm.254493	NM_020259		Hhip	Hhip1	Hedgehog-interacting protein	protein-coding
15852	chr18	84092198	84092698	intron (NM_146090, intron 1 of 1)	intron (NM_146090, intron 1 of 1)	4290	NM_146090	225791	Mm.147052	NM_146090	ENSMUSG00000049090	Zadh2	C530046K17Rik|Pthr3	zinc binding alcohol dehydrogenase, domain containing 2	protein-coding
29291	chr7	81497077	81497577	intron (NM_001193274, intron 1 of 5)	intron (NM_001193274, intron 1 of 5)	1003	NM_001193274	210321	Mm.99511	NM_183143	ENSMUSG00000061877	BC048679	-	cDNA sequence BC048679	protein-coding
10024	chr14	53439430	53439930	Intergenic	RLTR9B2|LTR|ERVK	-226260	NM_001205242	100568452	Mm.213248	NM_001205242		A430107P09Rik	Va10	RIKEN cDNA A430107P09 gene	protein-coding
28930	chr7	46963201	46963701	Intergenic	Intergenic	-4933	NM_001040695	54122	Mm.1999	NM_016855	ENSMUSG00000043262	Uevld	8430408E05Rik|Attp	UEV and lactate/malate dehyrogenase domains	protein-coding
14192	chr17	45578845	45579345	Intergenic	B2_Mm2|SINE|B2	-5834	NM_008302	15516	Mm.2180	NM_008302	ENSMUSG00000023944	Hsp90ab1	90kDa|AL022974|C81438|Hsp84|Hsp84-1|Hsp90|Hspcb	heat shock protein 90 alpha (cytosolic), class B member 1	protein-coding
8558	chr13	49247974	49248474	promoter-TSS (NM_025491)	promoter-TSS (NM_025491)	-61	NM_025491	66329	Mm.34308	NM_025491	ENSMUSG00000021384	Susd3	1700017I11Rik|2810440J20Rik	sushi domain containing 3	protein-coding
9611	chr14	21088692	21089192	intron (NM_001243041, intron 1 of 10)	MLTR14|LTR|ERV1	12790	NM_001243041	11534	Mm.188734	NM_134079	ENSMUSG00000039197	Adk	2310026J05Rik|5033405D03Rik|AI255373|AI987814|Ak	adenosine kinase	protein-coding
14084	chr17	35916520	35917020	promoter-TSS (NM_025878)	promoter-TSS (NM_025878)	-401	NM_025878	66973	Mm.29484	NM_025878	ENSMUSG00000024436	Mrps18b	2400002C15Rik	mitochondrial ribosomal protein S18B	protein-coding
13746	chr17	28386168	28386668	Intergenic	Intergenic	-21275	NM_021478	22157	Mm.42102	NM_021478	ENSMUSG00000037446	Tulp1	Tulp1l	tubby like protein 1	protein-coding
8159	chr13	21734060	21734560	promoter-TSS (NM_178210)	promoter-TSS (NM_178210)	-786	NM_178210	319159	Mm.486099	NM_178210		Hist1h4j	-	histone cluster 1, H4j	protein-coding
10865	chr15	25344064	25344564	Intergenic	Intergenic	69450	NM_027395	70350	Mm.29586	NM_027395	ENSMUSG00000045763	Basp1	2610024P12Rik|CAP-23|CAP23|Ckap3|NAP-22|NAP22	brain abundant, membrane attached signal protein 1	protein-coding
8157	chr13	21721715	21722215	promoter-TSS (NM_178200)	promoter-TSS (NM_178200)	-79	NM_178200	319186	Mm.277425	NM_178200	ENSMUSG00000096807	Hist1h2bm	H2b-291b	histone cluster 1, H2bm	protein-coding
19778	chr3	8664486	8664986	exon (NM_010423, exon 5 of 5)	exon (NM_010423, exon 5 of 5)	2302	NM_010423	15213	Mm.29581	NM_010423	ENSMUSG00000040289	Hey1	AI316788|AI414254|CHF2|HRT1|Herp2|Hesr1|bHLHb31|hesr-1	hairy/enhancer-of-split related with YRPW motif 1	protein-coding
13767	chr17	29032293	29032793	promoter-TSS (NM_013663)	promoter-TSS (NM_013663)	-117	NR_036613	20383	Mm.6787	NM_013663	ENSMUSG00000071172	Srsf3	AL024116|Sfrs3|X16	serine/arginine-rich splicing factor 3	protein-coding
28662	chr7	35269603	35270103	Intergenic	RLTR20B2|LTR|ERVK	48587	NM_026181	67471	Mm.358705	NM_026181	ENSMUSG00000063808	Gpatch1	1300003A17Rik|ECGP|Gpatc1	G patch domain containing 1	protein-coding
13867	chr17	31511986	31512486	exon (NM_021322, exon 1 of 11)	exon (NM_021322, exon 1 of 11)	251	NM_021322	57773	Mm.143771	NM_021322	ENSMUSG00000024037	Wdr4	AI415180|AI448349|D530049K22Rik	WD repeat domain 4	protein-coding
13935	chr17	33523885	33524385	promoter-TSS (NM_172619)	promoter-TSS (NM_172619)	-61	NR_037707	224697	Mm.29304	NM_172619	ENSMUSG00000024299	Adamts10	9430006O18|AW045948|Adam-ts10|Adamts-10|Znmp	a disintegrin-like and metallopeptidase (reprolysin type) with thrombospondin type 1 motif, 10	protein-coding
18369	chr2	108843825	108844325	Intergenic	RLTR13D6|LTR|ERVK	434215	NM_029790	76894	Mm.330451	NM_029790	ENSMUSG00000057234	Mettl15	0610027B03Rik|AI303697|AW049952|Mett5d1	methyltransferase like 15	protein-coding
13783	chr17	29347659	29348159	promoter-TSS (NM_019880)	promoter-TSS (NM_019880)	-5	NM_019880	56462	Mm.285322	NM_019880	ENSMUSG00000024012	Mtch1	2310034O17Rik|AI255158|AU018396|C77849|PSAP	mitochondrial carrier homolog 1 (C. elegans)	protein-coding
13948	chr17	33824325	33824825	promoter-TSS (NM_016844)	promoter-TSS (NM_016844)	3	NM_023202	66416	Mm.29513	NM_023202	ENSMUSG00000041881	Ndufa7	14.5kDa|2400007M02Rik|CI-B14.5a	NADH dehydrogenase (ubiquinone) 1 alpha subcomplex, 7 (B14.5a)	protein-coding
16503	chr19	40202781	40203281	Intergenic	RLTR13D2|LTR|ERVK	-15745	NM_145499	226105	Mm.29119	NM_145499	ENSMUSG00000060613	Cyp2c70	-	cytochrome P450, family 2, subfamily c, polypeptide 70	protein-coding
13904	chr17	32321057	32321557	promoter-TSS (NM_019774)	promoter-TSS (NM_019774)	-154	NM_019774	56399	Mm.328945	NM_019774	ENSMUSG00000024045	Akap8	1200016A02Rik|AA673585|AKAP95|AU015639	A kinase (PRKA) anchor protein 8	protein-coding
22153	chr4	61989832	61990335	Intergenic	RMER16-int|LTR|ERVK	64034	NM_001012323	381530	Mm.460005	NM_001012323	ENSMUSG00000078672	Mup20	Gm12560|Mup24|OTTMUSG00000007485|darcin	major urinary protein 20	protein-coding
14026	chr17	35089198	35089698	exon (NM_178592, exon 1 of 20)	exon (NM_178592, exon 1 of 20)	157	NM_178592	193742	Mm.43745	NM_178592	ENSMUSG00000007036	Abhd16a	AI326074|Bat-5|Bat5|D17H6S82E|NG26	abhydrolase domain containing 16A	protein-coding
21852	chr4	41773485	41773985	intron (NM_001164045, intron 1 of 2)	CpG-9830	366	NM_001164045	20301	Mm.335946	NM_011336	ENSMUSG00000073888	Ccl27a	ALP|AW558992|CTACK|CTAK|Ccl27|ESkine|ILC|PESKY|Scya27|Scya27a	chemokine (C-C motif) ligand 27A	protein-coding
28508	chr7	29039558	29040058	intron (NM_009109, intron 87 of 105)	MER91B|DNA|hAT-Tip100	43886	NR_035489	100316710		NR_035489		Mir1963	mmu-mir-1963	microRNA 1963	ncRNA
22142	chr4	59991765	59992265	Intergenic	RLTR9A3A|LTR|ERVK	-11534	NM_001081285	620807	Mm.464562	NM_001081285	ENSMUSG00000078689	Mup6	Gm12544|Mup2|OTTMUSG00000007423	major urinary protein 6	protein-coding
13506	chr17	21473325	21473828	Intergenic	Intergenic	-15412	NM_013843	24132	Mm.42140	NM_013843		Zfp53	D030067O06Rik|KRAZ1|Zfp-53|Zfp118|zfas8	zinc finger protein 53	protein-coding
7970	chr13	3477962	3478462	promoter-TSS (NR_015522)	promoter-TSS (NR_015522)	-91	NR_015522	76937	Mm.487240	NR_015522	ENSMUSG00000097709	2810429I04Rik	AI256682	RIKEN cDNA 2810429I04 gene	ncRNA
14069	chr17	35725501	35726001	Intergenic	Intergenic	-21612	NM_172962	12305	Mm.5021	NM_007584	ENSMUSG00000003534	Ddr1	6030432F18|AI323681|CD167a|Cak|Nep|PTK3A	discoidin domain receptor family, member 1	protein-coding
19634	chr2	177925612	177926112	intron (NR_038101, intron 1 of 1)	intron (NR_038101, intron 1 of 1)	28699	NR_038101	665205	Mm.440737	NR_038101		Gm14327	OTTMUSG00000016328	predicted gene 14327	pseudo
18041	chr2	79255069	79255569	promoter-TSS (NM_010576)	promoter-TSS (NM_010576)	-107	NM_010576	16401	Mm.31903	NM_010576	ENSMUSG00000027009	Itga4	CD49D|Itga4B	integrin alpha 4	protein-coding
14027	chr17	35126099	35126599	promoter-TSS (NM_033477)	promoter-TSS (NM_033477)	-53	NM_033477	114585	Mm.42070	NM_033477	ENSMUSG00000043311	D17H6S53E	G4|NG34	DNA segment, Chr 17, human D6S53E	protein-coding
14024	chr17	35051692	35052192	intron (NM_033444, intron 1 of 5)	intron (NM_033444, intron 1 of 5)	1699	NM_033444	114584	Mm.29524	NM_033444		Clic1	Clcp|G6	chloride intracellular channel 1	protein-coding
34585	chrX	95968532	95969032	Intergenic	Intergenic	-11808	NM_152822	76130	Mm.274318	NM_152822	ENSMUSG00000057421	Las1l	1810030A06Rik|5830482G23Rik	LAS1-like (S. cerevisiae)	protein-coding
29200	chr7	78595830	78596330	intron (NR_015542, intron 8 of 10)	intron (NR_015542, intron 8 of 10)	-18242	NM_182809	18213	Mm.33496	NM_008746		Ntrk3	AW125844|Ntrk3_tv3|TrkC	neurotrophic tyrosine kinase, receptor, type 3	protein-coding
13944	chr17	33760268	33760768	promoter-TSS (NM_008997)	promoter-TSS (NM_008997)	-32	NM_008997	19326	Mm.387587	NM_008997	ENSMUSG00000077450	Rab11b	A730055L17Rik	RAB11B, member RAS oncogene family	protein-coding
14290	chr17	47597999	47598499	intron (NM_001081636, intron 6 of 6)	intron (NM_001081636, intron 6 of 6)	4782	NM_007632	12445	Mm.27291	NM_007632	ENSMUSG00000034165	Ccnd3	9230106B05Rik|AA682053|AL024085|AW146355|C78795	cyclin D3	protein-coding
32215	chr9	7796118	7796618	Intergenic	Intergenic	11978	NR_049191	100885830		NR_049191		Mir5618	mmu-mir-5618	microRNA mir-5618	ncRNA
23998	chr5	18082233	18082733	Intergenic	ERVB7_3-LTR_MM|LTR|ERVK	119913	NM_001081143	242851	Mm.332230	NM_001081143	ENSMUSG00000028777	Gnat3	Ggust|Gtn	guanine nucleotide binding protein, alpha transducing 3	protein-coding
14147	chr17	43016279	43016779	promoter-TSS (NM_178589)	promoter-TSS (NM_178589)	-26	NM_178589	94185	Mm.200792	NM_178589	ENSMUSG00000023915	Tnfrsf21	AA959878|DR6|R74815|TR7	tumor necrosis factor receptor superfamily, member 21	protein-coding
13921	chr17	32809777	32810277	promoter-TSS (NM_001267583)	promoter-TSS (NM_001267583)	-96	NM_001267583	240063	Mm.30675	NM_183177		Zfp811	BC052046	zinc finger protein 811	protein-coding
14163	chr17	44078560	44079060	promoter-TSS (NM_032003)	promoter-TSS (NM_032003)	-36	NM_032003	83965	Mm.30145	NM_032003	ENSMUSG00000023960	Enpp5	AW061004|D17Abb1e|E-NPP 5|mKIAA4152	ectonucleotide pyrophosphatase/phosphodiesterase 5	protein-coding
13981	chr17	34234967	34235467	Intergenic	MTD|LTR|ERVL-MaLR	-3688	NM_010389	15002	Mm.327358	NM_010389	ENSMUSG00000041538	H2-Ob	A-beta-2|A-beta2|H-2Ab|H-2I|H-2Ob|H2-Ab|H2-Ab2|H2-IAb2|Ob	histocompatibility 2, O region beta locus	protein-coding
13972	chr17	34109403	34109903	Intergenic	Intergenic	10247	NR_037970	14312	Mm.3444	NM_010238	ENSMUSG00000024335	Brd2	AW228947|D17H6S113E|Frg-1|Fsrg-1|Fsrg1|Nat|Ring3|Rnf3|mKIAA4005	bromodomain containing 2	protein-coding
3015	chr10	75937155	75937655	TTS (NM_001277132)	TTS (NM_001277132)	1832	NM_175329	103172	Mm.333849	NM_175329	ENSMUSG00000049422	Chchd10	1620401E04Rik|AI267078|Ndg2	coiled-coil-helix-coiled-coil-helix domain containing 10	protein-coding
3759	chr10	126679143	126679643	Intergenic	B3A|SINE|B2	221978	NM_026858	68876	Mm.276769	NM_026858	ENSMUSG00000025436	Xrcc6bp1	1110068E08Rik|2410012H02Rik	XRCC6 binding protein 1	protein-coding
28991	chr7	56113646	56114146	intron (NM_010418, intron 19 of 92)	L1ME2|LINE|L1	63741	NM_010418	15204	Mm.20929	NM_010418	ENSMUSG00000030451	Herc2	D15F32S1h|D7H15F32S1|D7H15F37S1|jdf2|mKIAA0393|rjs	hect (homologous to the E6-AP (UBE3A) carboxyl terminus) domain and RCC1 (CHC1)-like domain (RLD) 2	protein-coding
14096	chr17	36084003	36084503	promoter-TSS (NM_008199)	promoter-TSS (NM_008199)	-4	NM_008199	14963	Mm.477808	NM_008199	ENSMUSG00000073406	H2-Bl	H2-B1	histocompatibility 2, blastocyst	protein-coding
28962	chr7	49639865	49640365	Intergenic	Intergenic	-3280	NM_001005232	13172	Mm.307176	NM_001005232	ENSMUSG00000030507	Dbx1	AI426026|Dbx	developing brain homeobox 1	protein-coding
8546	chr13	49020100	49020600	Intergenic	Intergenic	52238	NR_015601	68128	Mm.426304	NR_015601		Fam120aos	C030044B11Rik	family with sequence similarity 120A, opposite strand	ncRNA
31603	chr8	103873795	103874295	Intergenic	Intergenic	-227580	NM_009868	12562	Mm.21767	NM_009868	ENSMUSG00000031871	Cdh5	7B4|AA408225|Cd144|VE-Cad|VECD|VEcad|Vec	cadherin 5	protein-coding
13528	chr17	22866928	22867428	promoter-TSS (NM_001110254)	promoter-TSS (NM_001110254)	-44	NM_177358	240041	Mm.328828	NM_177358	ENSMUSG00000059142	Zfp945	A630033E08Rik|C730040L01Rik	zinc finger protein 945	protein-coding
13727	chr17	28142034	28142534	promoter-TSS (NM_001004366)	promoter-TSS (NM_001004366)	-242	NM_001004366	268935	Mm.258491	NM_001004366	ENSMUSG00000038677	Scube3	CEGF3|D030038I21Rik	signal peptide, CUB domain, EGF-like 3	protein-coding
13947	chr17	33817457	33817957	exon (NM_030697, exon 3 of 11)	exon (NM_030697, exon 3 of 11)	6791	NM_016844	54127	Mm.352374	NM_016844	ENSMUSG00000067288	Rps28	-	ribosomal protein S28	protein-coding
8160	chr13	21750191	21750691	exon (NM_178211, exon 1 of 1)	exon (NM_178211, exon 1 of 1)	112	NM_178211	319160	Mm.255646	NM_178211	ENSMUSG00000064288	Hist1h4k	-	histone cluster 1, H4k	protein-coding
29703	chr7	111122515	111123015	promoter-TSS (NR_015573)	promoter-TSS (NR_015573)	-90	NR_015573	75479	Mm.381620	NR_015573		1700012D14Rik	-	RIKEN cDNA 1700012D14 gene	ncRNA
525	chr1	58712401	58712901	promoter-TSS (NM_009805)	promoter-TSS (NM_009805)	-635	NM_009805	12633	Mm.336848	NM_009805	ENSMUSG00000026031	Cflar	2310024N18Rik|A430105C05Rik|CLARP|Cash|Casper|ENSMUSG00000072980|FLAME|FLAME-1|Flip|Gm9845|I-FLICE|MRIT|c-Flip	CASP8 and FADD-like apoptosis regulator	protein-coding
28118	chr7	14399332	14399832	Intergenic	RLTR13G|LTR|ERVK	38969	NM_001199306	76971	Mm.290727	NM_175250	ENSMUSG00000030378	2810007J24Rik	-	RIKEN cDNA 2810007J24 gene	protein-coding
10461	chr14	78850602	78851102	intron (NM_027906, intron 1 of 44)	intron (NM_027906, intron 1 of 44)	1674	NM_027906	219189	Mm.159651	NM_027906	ENSMUSG00000058997	Vwa8	1300010F03Rik|4932416F07Rik|AI957255|Kiaa0564|mKIAA0564	von Willebrand factor A domain containing 8	protein-coding
5465	chr11	87443244	87443744	intron (NM_031386, intron 2 of 30)	intron (NM_031386, intron 2 of 30)	15903	NM_001199293	83560	Mm.440758	NM_031386	ENSMUSG00000010342	Tex14	C85585	testis expressed gene 14	protein-coding
13716	chr17	27839817	27840317	promoter-TSS (NM_011432)	promoter-TSS (NM_011432)	-20	NM_011432	20630	Mm.103949	NM_011432	ENSMUSG00000024217	Snrpc	Snrp1c|U1-C|U1C	U1 small nuclear ribonucleoprotein C	protein-coding
13751	chr17	28622234	28622734	promoter-TSS (NM_016795)	promoter-TSS (NM_016795)	-30	NM_016795	20815	Mm.15252	NM_016795		Srpk1	AU017960	serine/arginine-rich protein specific kinase 1	protein-coding
12604	chr16	25517451	25517951	Intergenic	ORR1B1|LTR|ERVL-MaLR	-166064	NM_001127261	22061	Mm.20894	NM_011641	ENSMUSG00000022510	Trp63	AI462811|Ket|P51/P63|P63|P73l|Tp63|Trp53rp1	transformation related protein 63	protein-coding
19237	chr2	158616281	158616781	TTS (NM_009508)	TTS (NM_009508)	5773	NM_009508	22348	Mm.143404	NM_009508	ENSMUSG00000037771	Slc32a1	R75019|VGAT|Viaat	solute carrier family 32 (GABA vesicular transporter), member 1	protein-coding
11379	chr15	74914329	74914829	Intergenic	Intergenic	-32875	NM_025929	67038	Mm.154566	NM_025929	ENSMUSG00000063522	2010109I03Rik	-	RIKEN cDNA 2010109I03 gene	protein-coding
8144	chr13	21233884	21234384	Intergenic	Intergenic	54203	NM_009054	19720	Mm.314056	NM_009054	ENSMUSG00000021326	Trim27	AW538890|Gm19403|Rfp	tripartite motif-containing 27	protein-coding
13779	chr17	29263754	29264428	promoter-TSS (NM_026845)	promoter-TSS (NM_026845)	-120	NM_026845	68816	Mm.328928	NM_026845	ENSMUSG00000024007	Ppil1	1110060O10Rik|AI327391|Cypl1	peptidylprolyl isomerase (cyclophilin)-like 1	protein-coding
27321	chr6	111371877	111372377	intron (NM_177328, intron 8 of 9)	intron (NM_177328, intron 8 of 9)	726529	NM_177328	108073	Mm.240881	NM_177328	ENSMUSG00000056755	Grm7	6330570A01Rik|BB176677|C030018L03|E130018M02Rik|Gpr1g|Gprc1g|mGluR7	glutamate receptor, metabotropic 7	protein-coding
13788	chr17	29399144	29399644	Intergenic	Intergenic	38480	NM_001159538	26382	Mm.279187	NM_013710	ENSMUSG00000024013	Fgd2	Tcd-2|Tcd2|ZFYVE4|tcs-2|tcs2	FYVE, RhoGEF and PH domain containing 2	protein-coding
13924	chr17	32905175	32905675	3' UTR (NM_022434, exon 12 of 12)	3' UTR (NM_022434, exon 12 of 12)	11662	NM_022434	64385	Mm.486449	NM_022434	ENSMUSG00000024292	Cyp4f14	1300014O15Rik|cyp4f-14	cytochrome P450, family 4, subfamily f, polypeptide 14	protein-coding
32218	chr9	7805819	7806319	Intergenic	Intergenic	21679	NR_049191	100885830		NR_049191		Mir5618	mmu-mir-5618	microRNA mir-5618	ncRNA
14263	chr17	46857311	46857811	Intergenic	(CCCCG)n|Simple_repeat|Simple_repeat	-26148	NM_001100452	210982	Mm.37642	NM_001100452	ENSMUSG00000036568	Gltscr1l	mKIAA0240	GLTSCR1-like	protein-coding
10328	chr14	69171349	69171849	promoter-TSS (NM_010920)	promoter-TSS (NM_010920)	-203	NM_010920	18092	Mm.390691	NM_010920	ENSMUSG00000044186	Nkx2-6	AV044928|Nkx-2.6|Nkx2.6|Tix|tinman	NK2 homeobox 6	protein-coding
8001	chr13	5803586	5804086	Intergenic	Intergenic	54256	NR_045891	71867	Mm.179181	NR_045891		1700016G22Rik	-	RIKEN cDNA 1700016G22 gene	ncRNA
13849	chr17	31073265	31073765	intron (NM_009593, intron 2 of 14)	intron (NM_009593, intron 2 of 14)	15821	NM_009593	11307	Mm.15691	NM_009593		Abcg1	AW413978|Abc8|White	ATP-binding cassette, sub-family G (WHITE), member 1	protein-coding
9604	chr14	20891856	20892356	Intergenic	Intergenic	-37327	NM_009502	22330	Mm.279361	NM_009502	ENSMUSG00000021823	Vcl	9430097D22|AA571387|AI462105|AW545629	vinculin	protein-coding
34665	chrX	105391597	105392097	promoter-TSS (NR_015552)	promoter-TSS (NR_015552)	-93	NR_015552	100043213	Mm.388967	NR_015552	ENSMUSG00000087620	5330434G04Rik	-	RIKEN cDNA 5330434G04 gene	ncRNA
14080	chr17	35873682	35874182	exon (NM_001146710, exon 3 of 4)	exon (NM_001146710, exon 3 of 4)	-5846	NM_026987	69192	Mm.390986	NM_026987	ENSMUSG00000024422	Dhx16	2410006N22Rik|DBP2|Ddx16|mKIAA0577	DEAH (Asp-Glu-Ala-His) box polypeptide 16	protein-coding
24837	chr5	98854889	98855389	exon (NM_173404, exon 1 of 3)	exon (NM_173404, exon 1 of 3)	700	NM_173404	110075	Mm.209571	NM_173404	ENSMUSG00000029335	Bmp3	9130206H07|9530029I04Rik	bone morphogenetic protein 3	protein-coding
29026	chr7	63053453	63053953	Intergenic	RLTR20B5_MM|LTR|ERVK	158823	NM_007390	11441	Mm.113464	NM_007390	ENSMUSG00000030525	Chrna7	Acra7|alpha7	cholinergic receptor, nicotinic, alpha polypeptide 7	protein-coding
23415	chr4	138648014	138648514	Intergenic	Intergenic	-24272	NM_029401	75718	Mm.251530	NM_029401		Vwa5b1	4931403E03Rik	von Willebrand factor A domain containing 5B1	protein-coding
21555	chr4	9015601	9016101	Intergenic	Intergenic	-253466	NM_028940	74438	Mm.473368	NM_028940	ENSMUSG00000041216	Clvs1	4933402J24Rik|Clvl1|Rlbp1l1	clavesin 1	protein-coding
14040	chr17	35258049	35258549	Intergenic	Intergenic	-4795	NM_010380	14964	Mm.439675	NM_010380	ENSMUSG00000073411	H2-D1	H-2D|H2-D	histocompatibility 2, D region locus 1	protein-coding
423	chr1	47833999	47834499	Intergenic	ORR1C2-int|LTR|ERVL-MaLR	-367124	NR_105768	102466969		NR_105768	miRBase:MI0021878	Mir6350	mmu-mir-6350	microRNA mir-6350	ncRNA
22728	chr4	118281685	118282185	intron (NM_011213, intron 2 of 32)	intron (NM_011213, intron 2 of 32)	9462	NM_011213	19268	Mm.29855	NM_011213	ENSMUSG00000033295	Ptprf	AA591035|LAR|LARS|RPTP-LAR	protein tyrosine phosphatase, receptor type, F	protein-coding
13894	chr17	32091250	32091750	promoter-TSS (NR_027316)	promoter-TSS (NR_027316)	-77	NR_027316	435518	Mm.328944	NR_027316	ENSMUSG00000002791	Pdxk-ps	ENSMUSG00000002791|Gm9743	pyridoxal (pyridoxine, vitamin B6) kinase, pseudogene	pseudo
14023	chr17	35049422	35049922	promoter-TSS (NM_033444)	promoter-TSS (NM_033444)	-571	NM_033444	114584	Mm.29524	NM_033444		Clic1	Clcp|G6	chloride intracellular channel 1	protein-coding
26377	chr6	34187427	34187927	Intergenic	ORR1D1|LTR|ERVL-MaLR	-10623	NM_021435	58246	Mm.245527	NM_021435		Slc35b4	4930474D06Rik|AB041549|AW494345	solute carrier family 35, member B4	protein-coding
10718	chr14	124192212	124192712	promoter-TSS (NM_010201)	promoter-TSS (NM_010201)	84	NM_010201	14169	Mm.206362	NM_010201	ENSMUSG00000025551	Fgf14	FHF-4|Fhf4|mFHF-4(1B)	fibroblast growth factor 14	protein-coding
15290	chr18	37730750	37731250	promoter-TSS (NM_033577)	promoter-TSS (NM_033577)	-154	NM_033577	93702	Mm.247203	NM_033577		Pcdhgb5	-	protocadherin gamma subfamily B, 5	protein-coding
3627	chr10	117275639	117276560	Intergenic	RSINE1|SINE|B4	6173	NM_017372	17105	Mm.45436	NM_017372	ENSMUSG00000069516	Lyz2	AI326280|Lys|Lysm|Lyzs|Lzm|Lzm-s1|Lzp	lysozyme 2	protein-coding
3375	chr10	87860523	87861023	promoter-TSS (NM_001111274)	promoter-TSS (NM_001111274)	-338	NM_001111276	16000	Mm.268521	NM_010512	ENSMUSG00000020053	Igf1	C730016P09Rik|Igf-1|Igf-I	insulin-like growth factor 1	protein-coding
8154	chr13	21468243	21468743	promoter-TSS (NM_025719)	promoter-TSS (NM_025719)	8	NM_025719	66707	Mm.116869	NM_025719	ENSMUSG00000059395	Nkapl	4921504I05Rik	NFKB activating protein-like	protein-coding
13868	chr17	31519860	31520360	promoter-TSS (NM_030087)	promoter-TSS (NM_030087)	-5	NM_001083891	78330	Mm.28349	NM_030087	ENSMUSG00000024038	Ndufv3	1500032D16Rik	NADH dehydrogenase (ubiquinone) flavoprotein 3	protein-coding
3270	chr10	82899853	82900353	Intergenic	MTD|LTR|ERVL-MaLR	33477	NM_025499	66341	Mm.443284	NM_025499		Eid3	1700027M21Rik|NS4EB	EP300 interacting inhibitor of differentiation 3	protein-coding
25969	chr5	144457896	144458396	Intergenic	Intergenic	-87741	NM_016789	53324	Mm.10099	NM_016789	ENSMUSG00000059991	Nptx2	Narp|np2	neuronal pentraxin 2	protein-coding
13916	chr17	32634942	32635442	exon (NM_001100187, exon 13 of 13)	exon (NM_001100187, exon 13 of 13)	13873	NM_001100187	677156	Mm.484117	NM_001100187	ENSMUSG00000062464	Cyp4f37	Gm9705	cytochrome P450, family 4, subfamily f, polypeptide 37	protein-coding
14136	chr17	40934416	40934916	promoter-TSS (NM_008650)	promoter-TSS (NM_008650)	-19	NM_008650	17850	Mm.259884	NM_008650	ENSMUSG00000023921	Mut	D230010K02Rik|Mcm	methylmalonyl-Coenzyme A mutase	protein-coding
13729	chr17	28176821	28177685	promoter-TSS (NM_172617)	promoter-TSS (NM_172617)	-165	NM_172617	224656	Mm.267359	NM_172617	ENSMUSG00000024220	Zfp523	2810027J07|BC025615|Znf76	zinc finger protein 523	protein-coding
8152	chr13	21453471	21453971	promoter-TSS (NM_001013786)	promoter-TSS (NM_001013786)	6	NM_001013786	432731	Mm.441899	NM_001013786	ENSMUSG00000022228	Zscan26	BC068174|Zfp187|Znf187	zinc finger and SCAN domain containing 26	protein-coding
29051	chr7	63983562	63984062	Intergenic	B4A|SINE|B4	-44897	NM_021366	50794	Mm.240473	NM_021366	ENSMUSG00000052040	Klf13	0610043C13Rik|9430029L20Rik|Bteb3|FKLF-2|FKLF2|NSLP1|RFLAT-1|RFLAT1	Kruppel-like factor 13	protein-coding
33390	chr9	74026071	74026571	Intergenic	Intergenic	-84013	NM_001033500	546144	Mm.335289	NM_177908	ENSMUSG00000044976	Wdr72	AW558070|D230040E23	WD repeat domain 72	protein-coding
2155	chr10	4712364	4712864	exon (NM_007956, exon 2 of 9)	exon (NM_007956, exon 2 of 9)	100568	NM_007956	13982	Mm.9213	NM_007956	ENSMUSG00000019768	Esr1	AA420328|AU041214|ER-alpha|ER[a]|ERa|ERalpha|ESR|Estr|Estra|Nr3a1	estrogen receptor 1 (alpha)	protein-coding
14029	chr17	35166565	35167065	Intergenic	Intergenic	-1938	NM_020027	53761	Mm.272462	NM_020027	ENSMUSG00000024393	Prrc2a	3110039B05Rik|Bat-2|Bat2|D17H6S51E|G2|Wbp12|mKIAA4178	proline-rich coiled-coil 2A	protein-coding
27793	chr6	136470295	136470795	Intergenic	Intergenic	-48306	NM_019426	54343	Mm.173271	NM_019426	ENSMUSG00000030213	Atf7ip	2610204M12Rik|AM|Mcaf1	activating transcription factor 7 interacting protein	protein-coding
3761	chr10	126845353	126845853	Intergenic	Intergenic	55768	NM_026858	68876	Mm.276769	NM_026858	ENSMUSG00000025436	Xrcc6bp1	1110068E08Rik|2410012H02Rik	XRCC6 binding protein 1	protein-coding
19236	chr2	158613503	158614003	intron (NM_009508, intron 1 of 1)	intron (NM_009508, intron 1 of 1)	2995	NM_009508	22348	Mm.143404	NM_009508	ENSMUSG00000037771	Slc32a1	R75019|VGAT|Viaat	solute carrier family 32 (GABA vesicular transporter), member 1	protein-coding
25306	chr5	120023986	120024486	Intergenic	Intergenic	-92277	NM_028762	74111	Mm.41022	NM_028762		Rbm19	1200009A02Rik|AV302714|NPO	RNA binding motif protein 19	protein-coding
20439	chr3	86884418	86884918	intron (NM_001195497, intron 2 of 15)	intron (NM_001195497, intron 2 of 15)	36216	NM_001195497	70762	Mm.44490	NM_027539	ENSMUSG00000028078	Dclk2	6330415M09Rik|AU044875|CL2|CLICK2|Click-II|Dcamkl2	doublecortin-like kinase 2	protein-coding
28484	chr7	28464775	28465275	intron (NM_001141921, intron 4 of 4)	intron (NM_001141921, intron 4 of 4)	12787	NM_001141921	80749	Mm.483073	NM_030562		Lrfn1	BC004018|SALM2|Semo1	leucine rich repeat and fibronectin type III domain containing 1	protein-coding
1551	chr1	153733171	153733671	intron (NR_046171, intron 1 of 2)	intron (NR_046171, intron 1 of 2)	4408	NR_046171	329271	Mm.384841	NR_046171		C230024C17Rik	C230024C17	RIKEN cDNA C230024C17 gene	ncRNA
27591	chr6	124789437	124789937	Intergenic	MLT1F|LTR|ERVL-MaLR	-9969	NM_013588	16977	Mm.3207	NM_013588	ENSMUSG00000030125	Lrrc23	4921537K05Rik|B7|Lrpb7	leucine rich repeat containing 23	protein-coding
32792	chr9	46328682	46329182	Intergenic	Intergenic	-8946	NM_183104	74361	Mm.159169	NM_183104	ENSMUSG00000056617	4931429L15Rik	-	RIKEN cDNA 4931429L15 gene	protein-coding
14152	chr17	43265074	43265574	Intergenic	Intergenic	-5023	NM_133776	77596	Mm.159950	NM_133776	ENSMUSG00000041293	Gpr110	5031409J19Rik|KPG_009	G protein-coupled receptor 110	protein-coding
14037	chr17	35241404	35241904	promoter-TSS (NM_019693)	promoter-TSS (NM_019693)	-92	NM_019693	53817	Mm.439827	NM_019693	ENSMUSG00000019432	Ddx39b	0610030D10Rik|AI428441|Bat-1|Bat1|Bat1a|D17H6S81E|D17H6S81E-1|D6S81Eh	DEAD (Asp-Glu-Ala-Asp) box polypeptide 39B	protein-coding
19425	chr2	167220679	167221179	intron (NM_008968, intron 5 of 9)	RLTR12B|LTR|ERVK	19608	NM_008968	19223	Mm.2339	NM_008968	ENSMUSG00000017969	Ptgis	Cyp8|Cyp8a1|Pgis	prostaglandin I2 (prostacyclin) synthase	protein-coding
15603	chr18	65587098	65587598	intron (NM_207255, intron 2 of 5)	intron (NM_207255, intron 2 of 5)	7118	NM_207255	328977	Mm.286232	NM_207255	ENSMUSG00000042439	Zfp532	C530030I18Rik|Znf532|mKIAA1629	zinc finger protein 532	protein-coding
27735	chr6	131293021	131293521	promoter-TSS (NM_025564)	promoter-TSS (NM_025564)	-27	NM_025564	66441	Mm.46623	NM_025564	ENSMUSG00000030188	Magohb	2010012C16Rik|Mago|Magoh|Magoh-rs1	mago-nashi homolog B (Drosophila)	protein-coding
3579	chr10	110918304	110918804	Intergenic	ORR1B2|LTR|ERVL-MaLR	-1622	NM_007792	13008	Mm.2020	NM_007792	ENSMUSG00000020186	Csrp2	AW551867|Crp2|SmLim	cysteine and glycine-rich protein 2	protein-coding
14070	chr17	35727477	35727977	Intergenic	Intergenic	-23588	NM_172962	12305	Mm.5021	NM_007584	ENSMUSG00000003534	Ddr1	6030432F18|AI323681|CD167a|Cak|Nep|PTK3A	discoidin domain receptor family, member 1	protein-coding
15871	chr18	86712838	86713338	promoter-TSS (NM_172633)	promoter-TSS (NM_172633)	40	NM_172633	12405	Mm.70775	NM_172633	ENSMUSG00000024647	Cbln2	6330593N19Rik|A730004O05	cerebellin 2 precursor protein	protein-coding
19768	chr3	7666653	7667153	Intergenic	RLTR13E|LTR|ERVK	-53476	NM_008371	16196	Mm.3825	NM_008371	ENSMUSG00000040329	Il7	A630026I06Rik|Il-7|hlb368	interleukin 7	protein-coding
14054	chr17	35516827	35517327	promoter-TSS (NM_025674)	promoter-TSS (NM_025674)	-39	NM_146248	240084	Mm.49544	NM_146248	ENSMUSG00000040312	Cchcr1	Hcr	coiled-coil alpha-helical rod protein 1	protein-coding
27847	chr6	141693508	141694008	Intergenic	Lx|LINE|L1	64240	NM_020495	28253	Mm.272223	NM_020495	ENSMUSG00000030236	Slco1b2	7330442B20Rik|OATP-C|OATP2|Oatp1b2|Oatp4|Slc21a10|Slc21a6|lst-1|mlst-1	solute carrier organic anion transporter family, member 1b2	protein-coding
14225	chr17	46202454	46202954	promoter-TSS (NM_030715)	promoter-TSS (NM_030715)	-79	NM_030715	80905	Mm.311585	NM_030715	ENSMUSG00000023953	Polh	RAD30A|XPV	polymerase (DNA directed), eta (RAD 30 related)	protein-coding
14227	chr17	46253671	46254171	promoter-TSS (NM_001111142)	promoter-TSS (NM_001111142)	-244	NM_001111142	224813	Mm.70999	NM_001111142	ENSMUSG00000071073	Lrrc73	Gm88	leucine rich repeat containing 73	protein-coding
14215	chr17	46032135	46032635	promoter-TSS (NM_009505)	promoter-TSS (NM_009505)	-8	NM_001287056	22339	Mm.282184	NM_009505	ENSMUSG00000023951	Vegfa	Vegf|Vpf	vascular endothelial growth factor A	protein-coding
14698	chr17	81256089	81256589	Intergenic	RLTR9A2|LTR|ERVK	-191254	NM_028138	72167	Mm.273257	NM_028138	ENSMUSG00000024246	Thumpd2	2810025A12Rik	THUMP domain containing 2	protein-coding
14115	chr17	37028538	37029038	Intergenic	Intergenic	-5390	NM_010814	17441	Mm.210857	NM_010814	ENSMUSG00000076439	Mog	B230317G11Rik	myelin oligodendrocyte glycoprotein	protein-coding
13983	chr17	34262943	34263454	promoter-TSS (NM_207105)	promoter-TSS (NM_207105)	-29	NM_207105	14961	Mm.254067	NM_207105	ENSMUSG00000073421	H2-Ab1	AI845868|Abeta|H-2Ab|H2-Ab|I-Abeta|IAb|Ia-2|Ia2|Rmcs1	histocompatibility 2, class II antigen A, beta 1	protein-coding
2142	chr10	4242169	4242669	Intergenic	Intergenic	-23910	NM_031185	83397	Mm.27481	NM_031185	ENSMUSG00000038587	Akap12	AI317366|SSeCKS|Srcs5|Tsga12	A kinase (PRKA) anchor protein (gravin) 12	protein-coding
14141	chr17	42876396	42876896	promoter-TSS (NM_009847)	promoter-TSS (NM_009847)	-222	NM_009847	12488	Mm.218637	NM_009847	ENSMUSG00000061665	Cd2ap	AL024079|C78928|METS-1|Mets1	CD2-associated protein	protein-coding
4859	chr11	63455072	63455572	Intergenic	Intergenic	-69253	NR_105772	102466632		NR_105772	miRBase:MI0021882	Mir6354	mmu-mir-6354	microRNA mir-6354	ncRNA
20875	chr3	103576199	103576699	intron (NM_001276681, intron 1 of 7)	CpG	323	NM_001276681	54524	Mm.88818	NM_018800	ENSMUSG00000027849	Syt6	3110037A08Rik|AW048930|sytVI	synaptotagmin VI	protein-coding
25552	chr5	128879049	128879549	intron (NM_001081388, intron 1 of 21)	intron (NM_001081388, intron 1 of 21)	74063	NM_001081388	231760	Mm.233996	NM_001081388	ENSMUSG00000029420	Rimbp2	A930033C01Rik|mKIAA0318	RIMS binding protein 2	protein-coding
28904	chr7	46240642	46241142	promoter-TSS (NM_013624)	promoter-TSS (NM_013624)	-95	NM_013624	18419	Mm.8020	NM_013624	ENSMUSG00000009487	Otog	4932420K09|Otgn|twt	otogelin	protein-coding
13710	chr17	27708000	27708506	intron (NM_001286743, intron 9 of 9)	intron (NM_001286743, intron 9 of 9)	20698	NM_013891	30051	Mm.26768	NM_013891	ENSMUSG00000024215	Spdef	PDEF|Pse	SAM pointed domain containing ets transcription factor	protein-coding
28717	chr7	38191500	38192000	intron (NM_028166, intron 2 of 3)	intron (NM_028166, intron 2 of 3)	7963	NM_028166	72244	Mm.187554	NM_028166		1600014C10Rik	AI428873	RIKEN cDNA 1600014C10 gene	protein-coding
28980	chr7	53248550	53249050	Intergenic	Lx2|LINE|L1	643089	NR_105746	102466619		NR_105746	miRBase:MI0021585	Mir6238	mmu-mir-6238	microRNA mir-6238	ncRNA
30324	chr7	143401360	143401860	intron (NM_008434, intron 15 of 15)	intron (NM_008434, intron 15 of 15)	59440	NM_009876	12577	Mm.168789	NM_009876	ENSMUSG00000037664	Cdkn1c	AL024410|CDKI|Kip2|p57(kip2)|p57Kip2	cyclin-dependent kinase inhibitor 1C (P57)	protein-coding
29052	chr7	64036135	64036635	Intergenic	Intergenic	-97470	NM_021366	50794	Mm.240473	NM_021366	ENSMUSG00000052040	Klf13	0610043C13Rik|9430029L20Rik|Bteb3|FKLF-2|FKLF2|NSLP1|RFLAT-1|RFLAT1	Kruppel-like factor 13	protein-coding
32282	chr9	14532230	14532730	Intergenic	Intergenic	31861	NM_023153	66070	Mm.245938	NM_023153	ENSMUSG00000004096	Cwc15	0610040D20Rik|2900052N06Rik|Ed1|c11orf5|mED1	CWC15 homolog (S. cerevisiae)	protein-coding
14039	chr17	35254591	35255091	Intergenic	B3|SINE|B2	3552	NR_106169	102465886		NR_106169		Mir8094	mmu-mir-8094	microRNA mir-8094	ncRNA
26070	chr5	149117751	149118251	Intergenic	Intergenic	38191	NR_028061	667410	Mm.441522	NR_028061		Gm8615	EG667410	glucosamine-6-phosphate deaminase 1 pseudogene	pseudo
13870	chr17	31564583	31565083	promoter-TSS (NM_016670)	promoter-TSS (NM_016670)	60	NM_016670	18771	Mm.259295	NM_016670	ENSMUSG00000006705	Pknox1	D17Wsu76e|PREP1	Pbx/knotted 1 homeobox	protein-coding
26116	chr6	3340919	3341419	Intergenic	IAPEY4_I-int|LTR|ERVK	52650	NR_036696	667335	Mm.380219	NR_036696		Gm8579	EG667335	spermatogenesis associated glutamate (E)-rich protein 4a pseudogene	pseudo
7186	chr12	76215033	76215533	intron (NM_019784, intron 5 of 9)	RMER10B|LTR|ERVL	31463	NM_019784	80384	Mm.78551	NM_019784	ENSMUSG00000021056	Tex21	4931406F04Rik|4931412D23Rik|4931421K24Rik|tsec-2	testis expressed gene 21	protein-coding
13801	chr17	29614561	29615061	promoter-TSS (NM_021419)	promoter-TSS (NM_021419)	-20	NM_021419	58230	Mm.305994	NM_021419	ENSMUSG00000090083	Rnf8	3830404E21Rik|AIP37	ring finger protein 8	protein-coding
8142	chr13	21215346	21215846	Intergenic	Intergenic	35665	NM_009054	19720	Mm.314056	NM_009054	ENSMUSG00000021326	Trim27	AW538890|Gm19403|Rfp	tripartite motif-containing 27	protein-coding
25070	chr5	111740202	111740702	intron (NR_045832, intron 2 of 4)	intron (NR_045832, intron 2 of 4)	21276	NR_045833	269683	Mm.136946	NM_207252	ENSMUSG00000085271	E130006D01Rik	Gm16018|Gm681|OTTMUSG00000029083	RIKEN cDNA E130006D01 gene	ncRNA
28689	chr7	37207804	37208304	Intergenic	ORR1D2|LTR|ERVL-MaLR	509936	NM_172298	243931	Mm.44141	NM_172298	ENSMUSG00000021217	Tshz3	A630038G13Rik|Tsh3|Zfp537|mKIAA1474|teashirt3	teashirt zinc finger family member 3	protein-coding
18961	chr2	150257115	150257615	promoter-TSS (NM_001142410)	promoter-TSS (NM_001142410)	-152	NM_001142410	100216455	Mm.484816	NM_001142410	ENSMUSG00000079008	Gm14124	EG640962|ENSMUSG00000074735|Gm10749|OTTMUSG00000015734	predicted gene 14124	protein-coding
13943	chr17	33718466	33718966	promoter-TSS (NM_001252480)	promoter-TSS (NM_001252480)	-39	NM_001252480	224703	Mm.311439	NM_145486	ENSMUSG00000079557	2002-03-01	9530046H09Rik|MARCH-II	membrane-associated ring finger (C3HC4) 2	protein-coding
11895	chr15	94769103	94769603	intron (NM_178789, intron 3 of 7)	intron (NM_178789, intron 3 of 7)	140168	NM_178789	320709	Mm.74873	NM_178789	ENSMUSG00000063296	Tmem117	B930062P21Rik	transmembrane protein 117	protein-coding
1138	chr1	119642325	119642825	exon (NM_145506, exon 2 of 25)	exon (NM_145506, exon 2 of 25)	6425	NM_001113416	226352	Mm.253156	NM_145506	ENSMUSG00000026383	Epb4.1l5	1700030C16Rik|AL022914|BE37|E230025E14Rik|Epb41l5|Lulu1|NBL5	erythrocyte protein band 4.1-like 5	protein-coding
5570	chr11	93098137	93098637	promoter-TSS (NM_028296)	promoter-TSS (NM_028296)	-903	NM_028296	72605	Mm.342160	NM_028296	ENSMUSG00000056158	Car10	2700029L05Rik|BB085816|Ca10	carbonic anhydrase 10	protein-coding
14229	chr17	46298482	46298982	intron (NM_001286013, intron 2 of 5)	intron (NM_001286013, intron 2 of 5)	804	NM_001286013	106565	Mm.23633	NM_134120	ENSMUSG00000047428	Dlk2	AI413481|DLK-2|Egfl9	delta-like 2 homolog (Drosophila)	protein-coding
13927	chr17	32992882	32993382	promoter-TSS (NM_001045559)	promoter-TSS (NM_001045559)	-7	NM_001045559	240067	Mm.246667	NM_199020	ENSMUSG00000053390	Zfp952	BC057593|C920016K16Rik	zinc finger protein 952	protein-coding
30154	chr7	136240134	136240634	Intergenic	RLTR13G|LTR|ERVK	-27940	NR_102277	77383	Mm.227745	NR_102277		C030029H02Rik	-	RIKEN cDNA C030029H02 gene	ncRNA
13875	chr17	31664690	31665190	Intergenic	Intergenic	-6186	NM_001163769	108121	Mm.379289	NM_024187	ENSMUSG00000061613	U2af1	2010107D16Rik|35kDa	U2 small nuclear ribonucleoprotein auxiliary factor (U2AF) 1	protein-coding
15601	chr18	65582012	65582512	intron (NM_207255, intron 1 of 5)	intron (NM_207255, intron 1 of 5)	2032	NM_207255	328977	Mm.286232	NM_207255	ENSMUSG00000042439	Zfp532	C530030I18Rik|Znf532|mKIAA1629	zinc finger protein 532	protein-coding
3614	chr10	116018088	116018588	promoter-TSS (NM_011217)	promoter-TSS (NM_011217)	-25	NM_011217	19279	Mm.336316	NM_011217	ENSMUSG00000020151	Ptprr	Gmcp1|PTP-SL|PTPBR7|RPTPRR|mPTP213	protein tyrosine phosphatase, receptor type, R	protein-coding
31132	chr8	71537196	71537696	promoter-TSS (NM_198095)	promoter-TSS (NM_198095)	-9	NM_198095	69550	Mm.260325	NM_198095	ENSMUSG00000046718	Bst2	2310015I10Rik|Bst-2|C87040|CD317|DAMP-1|GREG	bone marrow stromal cell antigen 2	protein-coding
29198	chr7	77771678	77772178	Intergenic	Intergenic	805910	NM_008746	18213	Mm.33496	NM_008746		Ntrk3	AW125844|Ntrk3_tv3|TrkC	neurotrophic tyrosine kinase, receptor, type 3	protein-coding
14205	chr17	45735420	45735920	Intergenic	Intergenic	-1826	NM_028164	72240	Mm.482897	NM_028164	ENSMUSG00000094690	1600014C23Rik	-	RIKEN cDNA 1600014C23 gene	protein-coding
13848	chr17	31058644	31059144	intron (NM_009593, intron 1 of 14)	intron (NM_009593, intron 1 of 14)	1200	NM_009593	11307	Mm.15691	NM_009593		Abcg1	AW413978|Abc8|White	ATP-binding cassette, sub-family G (WHITE), member 1	protein-coding
11291	chr15	68758174	68758674	Intergenic	Intergenic	-169996	NM_010158	13992	Mm.17964	NM_010158	ENSMUSG00000022332	Khdrbs3	Etle|SLM-2|Salp|Slm2|T-STAR	KH domain containing, RNA binding, signal transduction associated 3	protein-coding
19774	chr3	8110526	8111026	Intergenic	RMER16-int|LTR|ERVK	-155889	NR_040587	75476	Mm.491752	NR_040587		1700010I02Rik	-	RIKEN cDNA 1700010I02 gene	ncRNA
13731	chr17	28207515	28208015	promoter-TSS (NM_027185)	promoter-TSS (NM_027185)	-13	NM_027185	23853	Mm.204731	NM_027185	ENSMUSG00000002257	Def6	2410003F05Rik|6430538D02Rik|AV094905|Ibp|Slat|Slat2|Slat6	differentially expressed in FDCP 6	protein-coding
21514	chr4	4242213	4242713	Intergenic	Intergenic	-104018	NM_001002927	18619	Mm.475097	NM_001002927	ENSMUSG00000045573	Penk	AI326464|ENK|PPA|Penk1	preproenkephalin	protein-coding
8137	chr13	21158780	21159280	Intergenic	Intergenic	-15975	NM_146534	258527	Mm.271440	NM_146534	ENSMUSG00000045474	Olfr1368	MOR256-15	olfactory receptor 1368	protein-coding
22024	chr4	48691763	48692263	Intergenic	Intergenic	28499	NM_026509	68016	Mm.133444	NM_026509	ENSMUSG00000028348	Murc	2310039E09Rik	muscle-related coiled-coil protein	protein-coding
12681	chr16	31235337	31235837	intron (NR_035427, intron 1 of 2)	intron (NR_035427, intron 1 of 2)	-34349	NM_030138	78618	Mm.274646	NM_030138	ENSMUSG00000049076	Acap2	4832442G16|9530039J15Rik|CNT-B2|Centb2|mKIAA0041	ArfGAP with coiled-coil, ankyrin repeat and PH domains 2	protein-coding
16119	chr19	8839051	8839551	promoter-TSS (NM_008144)	promoter-TSS (NM_008144)	-27	NM_008144	14705	Mm.345134	NM_008144	ENSMUSG00000071657	Bscl2	2900097C17Rik|AI046355|Gng3lg	Berardinelli-Seip congenital lipodystrophy 2 homolog (seipin)	protein-coding
13922	chr17	32830032	32830532	promoter-TSS (NM_177359)	promoter-TSS (NM_177359)	-21	NM_001293229	240064	Mm.476307	NM_177359		Zfp799	6030490I01Rik	zinc finger protein 799	protein-coding
14258	chr17	46782430	46782930	promoter-TSS (NM_025433)	promoter-TSS (NM_025433)	-24	NM_025433	66229	Mm.218533	NM_025433	ENSMUSG00000063888	Rpl7l1	1500016H10Rik	ribosomal protein L7-like 1	protein-coding
13942	chr17	33685219	33685719	promoter-TSS (NM_029804)	promoter-TSS (NM_029804)	-11	NM_001109913	76936	Mm.311439	NM_029804	ENSMUSG00000059208	Hnrnpm	2610023M21Rik|AA409009|Hnrpm|mKIAA4193	heterogeneous nuclear ribonucleoprotein M	protein-coding
5209	chr11	77679976	77680476	Intergenic	MTC|LTR|ERVL-MaLR	-5913	NM_001024205	68564	Mm.428996	NM_001024205		Nufip2	1110001M19Rik|9530056D24Rik|AI256692|AI461731|PIG1|mKIAA1321	nuclear fragile X mental retardation protein interacting protein 2	protein-coding
14090	chr17	35979357	35979857	promoter-TSS (NM_001165892)	promoter-TSS (NM_001165892)	-140	NM_001282024	75210	Mm.40036	NM_145487	ENSMUSG00000038500	Prr3	4930540G07Rik|Cat56	proline-rich polypeptide 3	protein-coding
13979	chr17	34187189	34187689	promoter-TSS (NM_001161730)	promoter-TSS (NM_001161730)	-109	NM_013585	16912	Mm.390983	NM_013585		Psmb9	Lmp-2|Lmp2	proteasome (prosome, macropain) subunit, beta type 9 (large multifunctional peptidase 2)	protein-coding
19483	chr2	168694621	168695121	intron (NM_001289445, intron 4 of 27)	intron (NM_001289445, intron 4 of 27)	39468	NM_001289445	11981	Mm.330819	NM_015731	ENSMUSG00000027546	Atp9a	IIa	ATPase, class II, type 9A	protein-coding
29032	chr7	63440264	63440764	Intergenic	MLTR11B|LTR|ERVK	-4258	NM_130880	170711	Mm.156872	NM_130880	ENSMUSG00000033510	Otud7a	AJ430384|Otud7	OTU domain containing 7A	protein-coding
14043	chr17	35274666	35275166	Intergenic	Intergenic	11793	NM_001267808	14980	Mm.439675	NM_001267808		H2-L	H-2L	histocompatibility 2, D region locus L	protein-coding
11595	chr15	80219200	80219700	Intergenic	Intergenic	-14630	NM_178719	239555	Mm.307163	NM_178719	ENSMUSG00000022412	Mief1	A230016E22|AI452372|Smcr7l	mitochondrial elongation factor 1	protein-coding
30488	chr8	10989892	10990392	intron (NM_001081212, intron 1 of 1)	intron (NM_001081212, intron 1 of 1)	-17708	NR_046017	619321	Mm.403007	NR_046017	ENSMUSG00000096938	9530052E02Rik	-	RIKEN cDNA 9530052E02 gene	ncRNA
3516	chr10	99286800	99287300	Intergenic	Intergenic	23819	NM_026268	67603	Mm.1791	NM_026268	ENSMUSG00000019960	Dusp6	1300019I03Rik|MKP-3|MKP3|PYST1	dual specificity phosphatase 6	protein-coding
13732	chr17	28224021	28224521	intron (NM_027185, intron 7 of 10)	intron (NM_027185, intron 7 of 10)	-8483	NM_011145	19015	Mm.328914	NM_011145	ENSMUSG00000002250	Ppard	NUC-1|NUC1|Nr1c2|PPAR-beta|PPAR-delta|PPAR[b]|PPARdelta|Pparb|Pparb/d	peroxisome proliferator activator receptor delta	protein-coding
3943	chr11	4283582	4284082	Intergenic	Intergenic	17036	NM_001039537	16878	Mm.4964	NM_008501	ENSMUSG00000034394	Lif	-	leukemia inhibitory factor	protein-coding
14085	chr17	35917773	35918273	TTS (NR_035445)	TTS (NR_035445)	134	NR_035445	100316810		NR_035445	miRBase:MI0008326	Mir1894	Mirn1894|mmu-mir-1894	microRNA 1894	ncRNA
13965	chr17	34027823	34028323	promoter-TSS (NM_013543)	promoter-TSS (NM_013543)	-18	NM_013543	14979	Mm.275452	NM_013543	ENSMUSG00000073422	H2-Ke6	D17H6S112E|H-2Ke6|Hsd17b8|Ke-6|Ke6|Ring2	H2-K region expressed gene 6	protein-coding
14071	chr17	35737739	35738239	Intergenic	Intergenic	-33850	NM_172962	12305	Mm.5021	NM_007584	ENSMUSG00000003534	Ddr1	6030432F18|AI323681|CD167a|Cak|Nep|PTK3A	discoidin domain receptor family, member 1	protein-coding
21290	chr3	137977132	137977632	intron (NM_011932, intron 1 of 8)	intron (NM_011932, intron 1 of 8)	4167	NM_011932	26377	Mm.254835	NM_011932	ENSMUSG00000028159	Dapp1	Bam32	dual adaptor for phosphotyrosine and 3-phosphoinositides 1	protein-coding
14098	chr17	36110747	36111247	intron (NM_001271005, intron 2 of 6)	intron (NM_001271005, intron 2 of 6)	679	NM_001271005	667803	Mm.477808	NM_001271005		C920025E04Rik	-	RIKEN cDNA C920025E04 gene	protein-coding
13910	chr17	32492341	32492841	3' UTR (NM_177307, exon 14 of 14)	3' UTR (NM_177307, exon 14 of 14)	-13871	NM_001101445	208285	Mm.311422	NM_001101445	ENSMUSG00000091586	Cyp4f17	EG208285	cytochrome P450, family 4, subfamily f, polypeptide 17	protein-coding
8151	chr13	21408366	21408866	Intergenic	Intergenic	-5861	NM_001145778	72739	Mm.296071	NM_023685	ENSMUSG00000021327	Zkscan3	2810435N07Rik|AA408594|AI132359|Skz1|Zf47|Zfp-47|Zfp306|Zfp307|mszf35	zinc finger with KRAB and SCAN domains 3	protein-coding
13917	chr17	32725625	32726126	Intergenic	RSINE1|SINE|B4	40216	NM_134127	106648	Mm.26539	NM_134127	ENSMUSG00000073424	Cyp4f15	AI787289|Cyp4f-15	cytochrome P450, family 4, subfamily f, polypeptide 15	protein-coding
28921	chr7	46748467	46748967	Intergenic	RLTR20B5_MM|LTR|ERVK	-3116	NM_011314	20209	Mm.200941	NM_011314	ENSMUSG00000057465	Saa2	AW111173|Saa-2|Saa1	serum amyloid A 2	protein-coding
14020	chr17	35021110	35021610	intron (NM_138582, intron 8 of 16)	intron (NM_138582, intron 8 of 16)	4781	NM_138582	27762	Mm.56895	NM_138582	ENSMUSG00000007030	Vwa7	C6orf27|D17H6S56E-3|G7c|NG37	von Willebrand factor A domain containing 7	protein-coding
13967	chr17	34034117	34034617	intron (NM_011306, intron 4 of 9)	intron (NM_011306, intron 4 of 9)	2017	NM_001205215	20182	Mm.1243	NM_011306	ENSMUSG00000039656	Rxrb	AL023085|H-2RIIBP|Nr2b2|RCoR-1|Rub	retinoid X receptor beta	protein-coding
30293	chr7	142405063	142405563	Intergenic	MTD|LTR|ERVL-MaLR	-17443	NM_009983	13033	Mm.231395	NM_009983	ENSMUSG00000007891	Ctsd	CD|CatD	cathepsin D	protein-coding
13912	chr17	32506080	32506742	promoter-TSS (NM_001101445)	promoter-TSS (NM_001101445)	-51	NM_001101445	208285	Mm.311422	NM_001101445	ENSMUSG00000091586	Cyp4f17	EG208285	cytochrome P450, family 4, subfamily f, polypeptide 17	protein-coding
13764	chr17	29007671	29008171	promoter-TSS (NM_134115)	promoter-TSS (NM_134115)	16	NM_134115	106504	Mm.439986	NM_134115	ENSMUSG00000024006	Stk38	5830476G13Rik|9530097A09Rik|AA617404|Ndr1	serine/threonine kinase 38	protein-coding
13968	chr17	34079584	34080084	Intergenic	Intergenic	-12545	NM_008206	15001	Mm.116	NM_008206	ENSMUSG00000024334	H2-Oa	H-2Oa	histocompatibility 2, O region alpha locus	protein-coding
14231	chr17	46383203	46383703	promoter-TSS (NM_021346)	promoter-TSS (NM_021346)	-313	NM_207671	57908	Mm.439916	NM_021346	ENSMUSG00000015597	Zfp318	2610034E08Rik|D530032D06Rik|TZF|Znf318	zinc finger protein 318	protein-coding
26555	chr6	49219865	49220365	Intergenic	Intergenic	-5161	NM_023670	140488	Mm.281018	NM_023670	ENSMUSG00000029814	Igf2bp3	2610101N11Rik|AA522010|AL022933|AU045931|IMP-3|IMP3|Koc13|Neilsen|mimp3	insulin-like growth factor 2 mRNA binding protein 3	protein-coding
19623	chr2	174760546	174761046	promoter-TSS (NM_007903)	promoter-TSS (NM_007903)	38	NM_007903	13616	Mm.9478	NM_007903	ENSMUSG00000027524	Edn3	114CH19|ET-3|PPET3|ls|tmgc48	endothelin 3	protein-coding
26072	chr5	149184347	149184847	promoter-TSS (NM_001115149)	promoter-TSS (NM_001115149)	37	NM_001286825	231915	Mm.29402	NM_001013378	ENSMUSG00000041264	Uspl1	E430026A01Rik	ubiquitin specific peptidase like 1	protein-coding
14193	chr17	45581361	45581861	Intergenic	Intergenic	-8350	NM_008302	15516	Mm.2180	NM_008302	ENSMUSG00000023944	Hsp90ab1	90kDa|AL022974|C81438|Hsp84|Hsp84-1|Hsp90|Hspcb	heat shock protein 90 alpha (cytosolic), class B member 1	protein-coding
17223	chr2	25621722	25622222	promoter-TSS (NM_001109993)	promoter-TSS (NM_001109993)	30	NM_001040130	51875	Mm.271147	NM_001040130	ENSMUSG00000026939	Tmem141	1110065P14Rik|AI663999|D2Ertd217e	transmembrane protein 141	protein-coding
14240	chr17	46552813	46553313	TTS (NR_105942)	TTS (NR_105942)	826	NR_105942	102466778		NR_105942		Mir6976	mmu-mir-6976	microRNA mir-6976	ncRNA
14007	chr17	34850056	34850556	promoter-TSS (NM_021337)	promoter-TSS (NM_021337)	-85	NM_001045863	27632	Mm.653	NM_138580	ENSMUSG00000024369	Nelfe	D17H6S45|NELF-E|RD|Rdbp	negative elongation factor complex member E, Rdbp	protein-coding
22409	chr4	98725336	98725836	Intergenic	ID_B1|SINE|B4	-1168	NM_001081202	381591	Mm.34340	NM_001081202	ENSMUSG00000087166	L1td1	AA546746|AB211064|D76865|ECAT11	LINE-1 type transposase domain containing 1	protein-coding
30302	chr7	142580102	142580602	Intergenic	Intergenic	-2206	NR_001592	14955	Mm.14802	NR_001592		H19	AI747191	H19, imprinted maternally expressed transcript	ncRNA
9048	chr13	86345180	86345680	Intergenic	RLTR9E|LTR|ERVK	-298635	NM_007749	12867	Mm.378898	NM_007749		Cox7c	COXVIIc|Cox7c1	cytochrome c oxidase subunit VIIc	protein-coding
14581	chr17	69563064	69563564	Intergenic	Intergenic	123988	NM_001145192	320722	Mm.400254	NM_001145192	ENSMUSG00000091636	A330050F15Rik	-	RIKEN cDNA A330050F15 gene	protein-coding
862	chr1	86467356	86467856	Intergenic	RMER21A|LTR|ERV1	41277	NM_027966	71863	Mm.179627	NM_027966	ENSMUSG00000036574	1700019O17Rik	-	RIKEN cDNA 1700019O17 gene	protein-coding
13813	chr17	29975658	29976158	Intergenic	Intergenic	-29179	NM_148926	21769	Mm.220972	NM_148926	ENSMUSG00000044477	Zfand3	AW539211|TEG-27|Tex27	zinc finger, AN1-type domain 3	protein-coding
29309	chr7	82233949	82234449	Intergenic	RMER10A|LTR|ERVL	-25709	NM_001277954	20408	Mm.736	NM_017400		Sh3gl3	EEN-B2|SH3P13|Sh3d2c|Sh3d2c2	SH3-domain GRB2-like 3	protein-coding
7132	chr12	72687641	72688141	Intergenic	MMERVK9E_I-int|LTR|ERVK	-23063	NM_025522	66375	Mm.289653	NM_025522	ENSMUSG00000021094	Dhrs7	2310016E22Rik|5730564L20Rik|AW061210|Retdsr4|Retsdr4	dehydrogenase/reductase (SDR family) member 7	protein-coding
26073	chr5	149228892	149229392	Intergenic	CpG	-35916	NM_009663	11690	Mm.19844	NM_009663	ENSMUSG00000060063	Alox5ap	Flap	arachidonate 5-lipoxygenase activating protein	protein-coding
370	chr1	40085673	40086173	promoter-TSS (NR_037980)	promoter-TSS (NR_037980)	-72	NR_037980	100047133	Mm.447052	NR_037980	ENSMUSG00000097899	Gm16894	-	predicted gene, 16894	ncRNA
19494	chr2	168980810	168981310	Intergenic	Intergenic	2791	NR_040326	75508	Mm.271256	NR_040326	ENSMUSG00000086348	1700017J07Rik	-	RIKEN cDNA 1700017J07 gene	ncRNA
28971	chr7	51510727	51511227	promoter-TSS (NM_177694)	promoter-TSS (NM_177694)	-52	NM_177694	233246	Mm.254431	NM_177694	ENSMUSG00000055489	Ano5	9330162L24|Gdd1|Tmem16e	anoctamin 5	protein-coding
19847	chr3	15055714	15056214	Intergenic	RLTR13G|LTR|ERVK	84763	NR_040549	77127	Mm.195792	NR_040549	ENSMUSG00000098008	A930001A20Rik	-	RIKEN cDNA A930001A20 gene	ncRNA
14110	chr17	36908186	36908686	intron (NM_146077, intron 7 of 7)	intron (NM_146077, intron 7 of 7)	10306	NM_146077	224762	Mm.213417	NM_146077	ENSMUSG00000058063	Trim31	BC026666|HCG1|HCGI|RNF	tripartite motif-containing 31	protein-coding
6015	chr11	103407131	103407631	intron (NM_183034, intron 1 of 11)	RLTR13G|LTR|ERVK	5283	NM_183034	353047	Mm.383308	NM_183034	ENSMUSG00000034247	Plekhm1	AP162|B2|BC038943|D330036J23Rik	pleckstrin homology domain containing, family M (with RUN domain) member 1	protein-coding
23036	chr4	129750325	129750825	Intergenic	Intergenic	-8272	NR_045036	20218	Mm.8256	NM_011317	ENSMUSG00000028790	Khdrbs1	Sam68|p62|p68	KH domain containing, RNA binding, signal transduction associated 1	protein-coding
29926	chr7	126274622	126275122	intron (NM_145587, intron 1 of 3)	intron (NM_145587, intron 1 of 3)	2253	NM_145587	104175	Mm.29660	NM_145587	ENSMUSG00000042978	Sbk1	Sbk	SH3-binding kinase 1	protein-coding
29088	chr7	66449938	66450728	Intergenic	Intergenic	-22856	NM_053080	56847	Mm.140988	NM_053080	ENSMUSG00000015134	Aldh1a3	ALDH6|RALDH3|V1	aldehyde dehydrogenase family 1, subfamily A3	protein-coding
25117	chr5	113174888	113175388	Intergenic	Intergenic	-11825	NM_172884	243219	Mm.160131	NM_172884	ENSMUSG00000051339	2900026A02Rik	8430408O14Rik|A530094D01|AW539426|Gm449|Kiaa1671|mKIAA1671	RIKEN cDNA 2900026A02 gene	protein-coding
32300	chr9	15431707	15432207	Intergenic	RLTR9A|LTR|ERVK	-73538	NM_133214	170748	Mm.86572	NM_133214	ENSMUSG00000058173	Smco4	Fn5	single-pass membrane protein with coiled-coil domains 4	protein-coding
4695	chr11	57832464	57832964	promoter-TSS (NM_008213)	promoter-TSS (NM_008213)	-567	NM_008213	15110	Mm.4746	NM_008213	ENSMUSG00000037335	Hand1	Ehand1|Hxt|Th1|Thing1|bHLHa27|eHAND	heart and neural crest derivatives expressed transcript 1	protein-coding
26535	chr6	48601689	48602189	Intergenic	CpG	8056	NM_001079905	58887	Mm.219183	NM_175099	ENSMUSG00000052751	Repin1	AI425994|Ap4|E430037F08Rik|Zfp-464|Zfp464	replication initiator 1	protein-coding
14087	chr17	35939125	35939625	Intergenic	Intergenic	-7779	NR_028278	667766	Mm.29385	NR_028278		Gm8801	-	protein phosphatase 1, regulatory subunit 10 pseudogene	pseudo
24363	chr5	36830441	36830941	promoter-TSS (NM_008550)	promoter-TSS (NM_008550)	-42	NM_008550	17160	Mm.761	NM_008550	ENSMUSG00000029119	Man2b2	mKIAA0935	mannosidase 2, alpha B2	protein-coding
3367	chr10	87492575	87493075	exon (NM_008553, exon 1 of 2)	exon (NM_008553, exon 1 of 2)	835	NM_008553	17172	Mm.136217	NM_008553	ENSMUSG00000020052	Ascl1	AI225900|ASH1|Mash1|bHLHa46	achaete-scute complex homolog 1 (Drosophila)	protein-coding
27566	chr6	123642378	123642878	intron (NM_001104637, intron 2 of 5)	RLTRETN_Mm|LTR|ERVK	8007	NM_001104637	546913	Mm.469875	NM_001104637	ENSMUSG00000095486	Vmn2r22	EG546913	vomeronasal 2, receptor 22	protein-coding
22172	chr4	62506761	62507261	3' UTR (NM_008525, exon 12 of 12)	3' UTR (NM_008525, exon 12 of 12)	-4811	NM_024257	72748	Mm.41506	NM_024257	ENSMUSG00000038422	Hdhd3	2810435D12Rik	haloacid dehalogenase-like hydrolase domain containing 3	protein-coding
31838	chr8	116438840	116439340	Intergenic	Intergenic	-65925	NM_029297	75465	Mm.23114	NM_029297	ENSMUSG00000034467	Dynlrb2	1700009A04Rik|DNLC2B|Dncl2b	dynein light chain roadblock-type 2	protein-coding
14285	chr17	47501973	47502473	promoter-TSS (NM_022015)	promoter-TSS (NM_022015)	64	NM_022015	63856	Mm.275901	NM_022015	ENSMUSG00000023980	Taf8	AW260255|Tbn	TAF8 RNA polymerase II, TATA box binding protein (TBP)-associated factorq	protein-coding
12687	chr16	31389275	31389775	Intergenic	MMETn-int|LTR|ERVK	-32772	NM_175177	71911	Mm.293470	NM_175177	ENSMUSG00000046598	Bdh1	2310032J20Rik|AI327223|Bdh	3-hydroxybutyrate dehydrogenase, type 1	protein-coding
13795	chr17	29467454	29467954	Intergenic	Intergenic	-23341	NM_008842	18712	Mm.405293	NM_008842		Pim1	Pim-1	proviral integration site 1	protein-coding
26212	chr6	16362065	16362565	Intergenic	RLTR9D|LTR|ERVK	536126	NM_031198	21426	Mm.36217	NM_031198	ENSMUSG00000029553	Tfec	BB107417|Tcfec|bHLHe34	transcription factor EC	protein-coding
24166	chr5	29485126	29485626	Intergenic	Intergenic	-6906	NM_019944	15285	Mm.103760	NM_019944		Mnx1	HB9|Hlxb9|MNR2	motor neuron and pancreas homeobox 1	protein-coding
13905	chr17	32348841	32349341	intron (NM_017476, intron 1 of 13)	MER20|DNA|hAT-Charlie	1486	NM_017476	54194	Mm.281005	NM_017476	ENSMUSG00000002625	Akap8l	HAP95|Nakap95	A kinase (PRKA) anchor protein 8-like	protein-coding
21105	chr3	122475708	122476208	intron (NM_013867, intron 3 of 11)	intron (NM_013867, intron 3 of 11)	56178	NM_013867	29815	Mm.45815	NM_013867	ENSMUSG00000028121	Bcar3	AI131758|AND-34	breast cancer anti-estrogen resistance 3	protein-coding
19631	chr2	177172695	177173195	Intergenic	Intergenic	-291797	NM_001177568	628308	Mm.460436	NM_001177568		Gm14420	OTTMUSG00000016588	predicted gene 14420	protein-coding
13762	chr17	28952217	28952717	promoter-TSS (NM_025888)	promoter-TSS (NM_025888)	-749	NM_025888	66989	Mm.435	NM_025888	ENSMUSG00000005936	Kctd20	2410004N11Rik|AI451943|AW541186|D17Ertd562e	potassium channel tetramerisation domain containing 20	protein-coding
29199	chr7	78568890	78569390	intron (NM_008746, intron 1 of 16)	intron (NM_008746, intron 1 of 16)	8698	NM_008746	18213	Mm.33496	NM_008746		Ntrk3	AW125844|Ntrk3_tv3|TrkC	neurotrophic tyrosine kinase, receptor, type 3	protein-coding
31633	chr8	105295574	105296074	intron (NM_177788, intron 1 of 13)	intron (NM_177788, intron 1 of 13)	274	NM_177788	277978	Mm.40228	NM_177788	ENSMUSG00000043251	Exoc3l	C730015A04Rik|Exoc3l1	exocyst complex component 3-like	protein-coding
13891	chr17	32036094	32036594	5' UTR (NM_028244, exon 1 of 16)	5' UTR (NM_028244, exon 1 of 16)	182	NM_028244	72462	Mm.102761	NM_028244	ENSMUSG00000058392	Rrp1b	2600005C20Rik|D030064A17|Kiaa0179|mKIAA0179	ribosomal RNA processing 1 homolog B (S. cerevisiae)	protein-coding
29308	chr7	82223945	82224445	Intergenic	Intergenic	-35713	NM_001277954	20408	Mm.736	NM_017400		Sh3gl3	EEN-B2|SH3P13|Sh3d2c|Sh3d2c2	SH3-domain GRB2-like 3	protein-coding
13990	chr17	34340542	34341042	3' UTR (NM_001033978, exon 5 of 5)	3' UTR (NM_001033978, exon 5 of 5)	3853	NM_010381	100504404	Mm.15680	NM_010381		H2-Ea-ps	AI323765|E-alpha-f|H-2Ea|H2-Ea|I-Ealpha|Ia-3|Ia3	histocompatibility 2, class II antigen E alpha, pseudogene	protein-coding
27588	chr6	124740861	124741361	promoter-TSS (NM_013535)	promoter-TSS (NM_013535)	-32	NM_013535	14790	Mm.439877	NM_013535		Grcc10	2310033H05Rik|C10	gene rich cluster, C10 gene	protein-coding
30884	chr8	47334090	47334590	intron (NM_175162, intron 1 of 4)	MER57C2|LTR|ERV1	18008	NM_175162	71069	Mm.23973	NM_175162	ENSMUSG00000038143	Stox2	4933409N07Rik|AI449080|AI835114|mKIAA1392	storkhead box 2	protein-coding
12576	chr16	23262112	23262612	intron (NM_001252505, intron 2 of 7)	intron (NM_001252505, intron 2 of 7)	-28108	NM_001252506	20440	Mm.149029	NM_145933	ENSMUSG00000022885	St6gal1	AW742324|Siat1|St6Gal-I|St6gal|St6galI	beta galactoside alpha 2,6 sialyltransferase 1	protein-coding
2886	chr10	64715750	64716250	intron (NM_001164519, intron 8 of 12)	intron (NM_001164519, intron 8 of 12)	-625745	NM_178678	216028	Mm.431318	NM_178678	ENSMUSG00000042846	Lrrtm3	9630044H04Rik	leucine rich repeat transmembrane neuronal 3	protein-coding
33276	chr9	67043752	67044252	promoter-TSS (NM_001164256)	promoter-TSS (NM_001164256)	-131	NM_001164254	22003	Mm.121878	NM_024427	ENSMUSG00000032366	Tpm1	AA986836|AI854628|TM2|Tm3|Tmpa|Tpm-1|alpha-TM	tropomyosin 1, alpha	protein-coding
18248	chr2	100399771	100400271	Intergenic	Intergenic	-1224727	NM_009020	19374	Mm.4988	NM_009020	ENSMUSG00000032864	Rag2	Rag-2	recombination activating gene 2	protein-coding
8143	chr13	21222424	21222924	Intergenic	Intergenic	42743	NM_009054	19720	Mm.314056	NM_009054	ENSMUSG00000021326	Trim27	AW538890|Gm19403|Rfp	tripartite motif-containing 27	protein-coding
32055	chr8	123453936	123454436	intron (NM_001281803, intron 4 of 11)	intron (NM_001281803, intron 4 of 11)	10927	NM_001281803	23854	Mm.275127	NM_054046	ENSMUSG00000001482	Def8	AI449518|D8Ertd713e|DEF-8	differentially expressed in FDCP 8	protein-coding
14025	chr17	35058828	35059387	promoter-TSS (NM_001190449)	promoter-TSS (NM_001190449)	72	NM_016765	51793	Mm.1457	NM_016765	ENSMUSG00000007039	Ddah2	1110003M04Rik|AU019324|AW413173|DDAH-2|DDAHII|Ddah|G6a|NG30	dimethylarginine dimethylaminohydrolase 2	protein-coding
5469	chr11	87462307	87462807	intron (NM_031386, intron 2 of 30)	intron (NM_031386, intron 2 of 30)	34966	NM_001199293	83560	Mm.440758	NM_031386	ENSMUSG00000010342	Tex14	C85585	testis expressed gene 14	protein-coding
29813	chr7	118595172	118595672	Intergenic	Intergenic	-1875	NM_001105252	74424	Mm.11068	NM_028930	ENSMUSG00000030650	Tmc5	4932443L08Rik|AU016085	transmembrane channel-like gene family 5	protein-coding
32539	chr9	32450008	32450508	intron (NM_008026, intron 5 of 8)	intron (NM_008026, intron 5 of 8)	56273	NM_001168354	56379	Mm.390168	NM_019659	ENSMUSG00000041248	Kcnj1	Kir1.1|ROMK|Romk2	potassium inwardly-rectifying channel, subfamily J, member 1	protein-coding
22410	chr4	98727959	98728459	intron (NM_001081202, intron 2 of 4)	intron (NM_001081202, intron 2 of 4)	1455	NM_001081202	381591	Mm.34340	NM_001081202	ENSMUSG00000087166	L1td1	AA546746|AB211064|D76865|ECAT11	LINE-1 type transposase domain containing 1	protein-coding
13920	chr17	32788083	32788583	promoter-TSS (NM_172458)	promoter-TSS (NM_172458)	-46	NM_172458	208292	Mm.38813	NM_172458		Zfp871	4732483N19|9030612M13Rik|AI118577|AI265322|mKIAA3006	zinc finger protein 871	protein-coding
30291	chr7	142371903	142372403	intron (NM_177265, intron 1 of 3)	CpG	106	NM_177265	320802	Mm.154486	NM_177265	ENSMUSG00000045777	Ifitm10	6330512M04Rik|AI848576|DSPA3	interferon induced transmembrane protein 10	protein-coding
14291	chr17	47611260	47611760	promoter-TSS (NM_020048)	promoter-TSS (NM_020048)	-18	NM_016859	53414	Mm.472101	NM_016859	ENSMUSG00000023988	Bysl	Bys|Enp1	bystin-like	protein-coding
20979	chr3	108588333	108588833	Intergenic	MLTR14|LTR|ERV1	-2695	NM_181400	99512	Mm.285968	NM_181400	ENSMUSG00000040389	Wdr47	1810073M12Rik|AA552998|mKIAA0893	WD repeat domain 47	protein-coding
13811	chr17	29889046	29889546	Intergenic	CpG	-1414	NM_001081160	74762	Mm.40901	NM_001081160	ENSMUSG00000043557	Mdga1	1200011I03Rik|GPIM|Mamdc3	MAM domain containing glycosylphosphatidylinositol anchor 1	protein-coding
8955	chr13	74617132	74617632	Intergenic	Intergenic	-22490	NM_030711	80898	Mm.83526	NM_030711	ENSMUSG00000021583	Erap1	Arts1|ERAAP|PILSA|PILSAP	endoplasmic reticulum aminopeptidase 1	protein-coding
13247	chr16	95585388	95585888	Intergenic	CpG	-55273	NM_133659	13876	Mm.164531	NM_133659	ENSMUSG00000040732	Erg	D030036I24Rik	avian erythroblastosis virus E-26 (v-ets) oncogene related	protein-coding
13975	chr17	34135281	34135781	5' UTR (NM_010386, exon 2 of 6)	5' UTR (NM_010386, exon 2 of 6)	-9885	NM_010388	15000	Mm.195060	NM_010388		H2-DMb2	H-2Mb2|H2-Mb2	histocompatibility 2, class II, locus Mb2	protein-coding
13991	chr17	34398566	34399066	promoter-TSS (NM_001163855)	promoter-TSS (NM_001163855)	-4	NM_001163855	407788	Mm.73205	NM_001001177	ENSMUSG00000057246	BC051142	NG8|TSBP|Tesb|Tesbp	cDNA sequence BC051142	protein-coding
28724	chr7	39487038	39487538	Intergenic	Intergenic	-30478	NM_001004139	70227	Mm.333800	NM_001004139	ENSMUSG00000068959	Zfp619	3000002G13Rik	zinc finger protein 619	protein-coding
14062	chr17	35590778	35591278	Intergenic	Intergenic	23543	NM_175148	69542	Mm.265291	NM_175148	ENSMUSG00000039269	2300002M23Rik	Stg|emprin	RIKEN cDNA 2300002M23 gene	protein-coding
29223	chr7	79507279	79507779	intron (NR_040313, intron 1 of 2)	intron (NR_040313, intron 1 of 2)	2265	NR_029818	723968		NR_029818	miRBase:MI0000721	Mir9-3	Mirn9-3|mmu-mir-9-3	microRNA 9-3	ncRNA
16114	chr19	8770799	8771299	promoter-TSS (NM_025791)	promoter-TSS (NM_025791)	53	NM_025791	66836	Mm.440071	NM_025791	ENSMUSG00000075043	Tmem223	0610006I08Rik	transmembrane protein 223	protein-coding
8679	chr13	55474442	55474942	intron (NM_001177372, intron 12 of 13)	intron (NM_001177372, intron 12 of 13)	3084	NR_105909	102465569		NR_105909		Mir6944	mmu-mir-6944	microRNA mir-6944	ncRNA
14078	chr17	35861280	35861780	intron (NM_134122, intron 1 of 3)	CpG	212	NM_134122	106582	Mm.390992	NM_134122	ENSMUSG00000059791	Nrm	2610307M02Rik|AI429796	nurim (nuclear envelope membrane protein)	protein-coding
8141	chr13	21199990	21200490	Intergenic	tRNA-Leu-TTG|tRNA|tRNA	20309	NM_009054	19720	Mm.314056	NM_009054	ENSMUSG00000021326	Trim27	AW538890|Gm19403|Rfp	tripartite motif-containing 27	protein-coding
7188	chr12	76222083	76222583	intron (NM_019784, intron 3 of 9)	intron (NM_019784, intron 3 of 9)	24413	NM_019784	80384	Mm.78551	NM_019784	ENSMUSG00000021056	Tex21	4931406F04Rik|4931412D23Rik|4931421K24Rik|tsec-2	testis expressed gene 21	protein-coding
22173	chr4	62519722	62520222	promoter-TSS (NM_008525)	promoter-TSS (NM_008525)	-63	NM_001276446	17025	Mm.6988	NM_008525	ENSMUSG00000028393	Alad	ALADH|Lv	aminolevulinate, delta-, dehydratase	protein-coding
13733	chr17	28225995	28226495	exon (NM_027185, exon 9 of 11)	exon (NM_027185, exon 9 of 11)	-6509	NM_011145	19015	Mm.328914	NM_011145	ENSMUSG00000002250	Ppard	NUC-1|NUC1|Nr1c2|PPAR-beta|PPAR-delta|PPAR[b]|PPARdelta|Pparb|Pparb/d	peroxisome proliferator activator receptor delta	protein-coding
14001	chr17	34627291	34627791	promoter-TSS (NM_019441)	promoter-TSS (NM_019441)	-444	NM_019441	54397	Mm.373627	NM_019441	ENSMUSG00000015474	Ppt2	0610007M19Rik|AA672937	palmitoyl-protein thioesterase 2	protein-coding
3754	chr10	125764374	125764874	Intergenic	LTR41B|LTR|ERVL	-201595	NM_177152	320398	Mm.275586	NM_177152	ENSMUSG00000020105	Lrig3	9030421L11Rik|9130004I02Rik|9430095K15Rik|mKIAA3016	leucine-rich repeats and immunoglobulin-like domains 3	protein-coding
21836	chr4	41568155	41568655	intron (NM_027993, intron 1 of 5)	intron (NM_027993, intron 1 of 5)	1122	NM_001159583	71901	Mm.39215	NM_027993		Fam219a	2310028H24Rik	family with sequence similarity 219, member A	protein-coding
3758	chr10	126663460	126663960	Intergenic	B3A|SINE|B2	237661	NM_026858	68876	Mm.276769	NM_026858	ENSMUSG00000025436	Xrcc6bp1	1110068E08Rik|2410012H02Rik	XRCC6 binding protein 1	protein-coding
30155	chr7	136241178	136241678	Intergenic	ETnERV-int|LTR|ERVK	-26896	NR_102277	77383	Mm.227745	NR_102277		C030029H02Rik	-	RIKEN cDNA C030029H02 gene	ncRNA
32111	chr8	125733996	125734496	promoter-TSS (NM_025636)	promoter-TSS (NM_025636)	43	NM_025636	66566	Mm.25296	NM_025636	ENSMUSG00000031851	Ntpcr	2310079N02Rik|AI449709	nucleoside-triphosphatase, cancer-related	protein-coding
22454	chr4	102087709	102088209	Intergenic	CpG	101119	NM_001085520	381536	Mm.297685	NM_001085520		Gm12789	OTTMUSG00000008445	predicted gene 12789	protein-coding
14242	chr17	46556098	46556598	promoter-TSS (NM_020493)	promoter-TSS (NM_020493)	-186	NM_020493	20807	Mm.45044	NM_020493	ENSMUSG00000015605	Srf	AW049942|AW240594	serum response factor	protein-coding
27717	chr6	129066960	129067460	Intergenic	Intergenic	21309	NM_153094	232408	Mm.259262	NM_153094	ENSMUSG00000030154	Klrb1f	A630024B12Rik|Nkr-p1f|Nkrp1-f|Nkrp1f	killer cell lectin-like receptor subfamily B member 1F	protein-coding
29041	chr7	63802718	63803218	Intergenic	Intergenic	-113889	NM_001256311	381994	Mm.425466	NM_001256311	ENSMUSG00000095061	E030018B13Rik	Gm1697	RIKEN cDNA E030018B13 gene	protein-coding
8165	chr13	21914527	21915027	Intergenic	Intergenic	-17728	NR_035500	100316716		NR_035500	miRBase:MI0009990	Mir1983	mmu-mir-1983	microRNA 1983	ncRNA
2216	chr10	8364124	8364624	intron (NM_177387, intron 2 of 7)	intron (NM_177387, intron 2 of 7)	154451	NM_177387	338362	Mm.41163	NM_177387	ENSMUSG00000047712	Ust	D930010O20Rik|UA2OST	uronyl-2-sulfotransferase	protein-coding
6659	chr12	17176363	17176863	5' UTR (NM_201531, exon 1 of 1)	5' UTR (NM_201531, exon 1 of 1)	275	NM_201531	382571	Mm.40173	NM_201531	ENSMUSG00000051726	Kcnf1	Gm1182|Kv5.1	potassium voltage-gated channel, subfamily F, member 1	protein-coding
14254	chr17	46715073	46715573	intron (NM_145488, intron 3 of 16)	intron (NM_145488, intron 3 of 16)	3860	NM_145488	224824	Mm.299399	NM_145488	ENSMUSG00000002763	Pex6	AI132582|D130055I09Rik|mKIAA4177	peroxisomal biogenesis factor 6	protein-coding
22171	chr4	62502015	62502515	promoter-TSS (NM_024257)	promoter-TSS (NM_024257)	-65	NM_024257	72748	Mm.41506	NM_024257	ENSMUSG00000038422	Hdhd3	2810435D12Rik	haloacid dehalogenase-like hydrolase domain containing 3	protein-coding
14083	chr17	35909817	35910317	promoter-TSS (NM_001142744)	promoter-TSS (NM_001142744)	1	NM_028476	73242	Mm.273155	NM_028476	ENSMUSG00000024426	Atat1	0610011P08Rik|2610008K08Rik|2610110G12Rik|3110080J08Rik|Mec17|TAT	alpha tubulin acetyltransferase 1	protein-coding
21707	chr4	26292282	26292782	Intergenic	Lx3C|LINE|L1	54120	NM_172865	242362	Mm.245602	NM_172865	ENSMUSG00000040520	Manea	4932703L02Rik	mannosidase, endo-alpha	protein-coding
13747	chr17	28407365	28407865	intron (NM_010220, intron 8 of 10)	intron (NM_010220, intron 8 of 10)	-42472	NM_021478	22157	Mm.42102	NM_021478	ENSMUSG00000037446	Tulp1	Tulp1l	tubby like protein 1	protein-coding
14238	chr17	46525563	46526063	exon (NM_001081335, exon 14 of 41)	exon (NM_001081335, exon 14 of 41)	20575	NM_001081335	78309	Mm.329076	NM_001081335	ENSMUSG00000040327	Cul9	1810035I07Rik|Cul-9|Parc|mKIAA0708	cullin 9	protein-coding
34181	chr9	124033282	124033782	Intergenic	Intergenic	11561	NM_009914	12771	Mm.57050	NM_009914	ENSMUSG00000035448	Ccr3	CC-CKR3|CKR3|Cmkbr1l2|Cmkbr3	chemokine (C-C motif) receptor 3	protein-coding
28993	chr7	56419240	56419740	intron (NM_021879, intron 21 of 23)	intron (NM_021879, intron 21 of 23)	179719	NM_021879	18431	Mm.137052	NM_021879	ENSMUSG00000030450	Oca2	D7H15S12|D7Icr28RN|D7Nic1|p	oculocutaneous albinism II	protein-coding
10492	chr14	87110590	87111090	intron (NM_019670, intron 2 of 27)	intron (NM_019670, intron 2 of 27)	30274	NM_019670	56419	Mm.440585	NM_019670	ENSMUSG00000022021	Diap3	4930417P13Rik|Dia2|Diaph3|Drf3|mDia2|mKIAA4117|p134MDia2	diaphanous homolog 3 (Drosophila)	protein-coding
23664	chr4	149049521	149050021	intron (NM_019781, intron 2 of 8)	intron (NM_019781, intron 2 of 8)	50041	NM_019781	56273	Mm.184172	NM_019781	ENSMUSG00000028975	Pex14	Pex14p|R75137	peroxisomal biogenesis factor 14	protein-coding
13786	chr17	29396867	29397367	Intergenic	Intergenic	36203	NM_001159538	26382	Mm.279187	NM_013710	ENSMUSG00000024013	Fgd2	Tcd-2|Tcd2|ZFYVE4|tcs-2|tcs2	FYVE, RhoGEF and PH domain containing 2	protein-coding
13926	chr17	32965541	32966042	promoter-TSS (NM_153063)	promoter-TSS (NM_153063)	-40	NM_153063	224691	Mm.328953	NM_153063	ENSMUSG00000053600	Zfp472	KRIM-1|Krim-1A|Krim-1B|Krim1	zinc finger protein 472	protein-coding
14236	chr17	46496497	46496997	promoter-TSS (NM_207161)	promoter-TSS (NM_207161)	-42	NM_207161	381101	Mm.35801	NM_207161	ENSMUSG00000040658	Dnph1	C76683|Rcl	2'-deoxynucleoside 5'-phosphate N-hydrolase 1	protein-coding
8140	chr13	21169741	21170241	Intergenic	Intergenic	-9940	NM_009054	19720	Mm.314056	NM_009054	ENSMUSG00000021326	Trim27	AW538890|Gm19403|Rfp	tripartite motif-containing 27	protein-coding
14012	chr17	34915258	34915758	intron (NM_023557, intron 1 of 20)	intron (NM_023557, intron 1 of 20)	1042	NM_023557	70129	Mm.183126	NM_023557	ENSMUSG00000007034	Slc44a4	2210409B01Rik|NG22	solute carrier family 44, member 4	protein-coding
19273	chr2	160912134	160912634	promoter-TSS (NM_182840)	promoter-TSS (NM_182840)	-45	NM_182840	280635	Mm.330747	NM_182840	ENSMUSG00000050700	Emilin3	1110013O17Rik|EMILIN-3|EMILIN-5|EMILIN-T|Emilin5	elastin microfibril interfacer 3	protein-coding
32217	chr9	7804948	7805448	Intergenic	Intergenic	20808	NR_049191	100885830		NR_049191		Mir5618	mmu-mir-5618	microRNA mir-5618	ncRNA
14160	chr17	43801547	43802047	promoter-TSS (NM_207649)	promoter-TSS (NM_207649)	-54	NM_207649	53901	Mm.251242	NM_030598	ENSMUSG00000039601	Rcan2	Csp2|Dscr1l1|MCIP2|ZAKI-4	regulator of calcineurin 2	protein-coding
14095	chr17	36060748	36061248	Intergenic	Intergenic	-2627	NM_001199967	100529082	Mm.484641	NM_001199967	ENSMUSG00000079492	Gm11127	ENSMUSG00000079492	predicted gene 11127	protein-coding
32118	chr8	126058850	126059350	Intergenic	Intergenic	63998	NM_008430	16525	Mm.10800	NM_008430	ENSMUSG00000033998	Kcnk1	AI788889|TWIK-1	potassium channel, subfamily K, member 1	protein-coding
13914	chr17	32536247	32536748	promoter-TSS (NM_024442)	promoter-TSS (NM_024442)	-132	NM_024442	70101	Mm.30504	NM_024442	ENSMUSG00000048440	Cyp4f16	2310021J05Rik|AI746515	cytochrome P450, family 4, subfamily f, polypeptide 16	protein-coding
15357	chr18	41951051	41951551	promoter-TSS (NM_029942)	promoter-TSS (NM_029942)	-107	NM_029942	77619	Mm.30649	NM_029942	ENSMUSG00000056671	Prelid2	1700003A01Rik|C330008K14Rik	PRELI domain containing 2	protein-coding
29016	chr7	61499479	61499979	Intergenic	ETnERV2-int|LTR|ERVK	115598	NR_045727	319752	Mm.294476	NR_045727		B230209E15Rik	-	RIKEN cDNA B230209E15 gene	ncRNA
24498	chr5	53671386	53671886	Intergenic	RLTR23|LTR|ERV1	26952	NR_024201	19866		NR_024201	ENSMUSG00000089083	Rnu7	-	U7 small nuclear RNA	snRNA
16015	chr19	5803331	5803831	promoter-TSS (NR_002847)	promoter-TSS (NR_002847)	-910	NR_002847	72289	Mm.298256	NR_002847	ENSMUSG00000092341	Malat1	2210401K01Rik|9430072K23Rik|AI647968|Neat2	metastasis associated lung adenocarcinoma transcript 1 (non-coding RNA)	ncRNA
13769	chr17	29049052	29049552	Intergenic	Intergenic	16642	NM_013663	20383	Mm.6787	NM_013663	ENSMUSG00000071172	Srsf3	AL024116|Sfrs3|X16	serine/arginine-rich splicing factor 3	protein-coding
15628	chr18	66860351	66860851	promoter-TSS (NM_016977)	promoter-TSS (NM_016977)	-114	NM_016977	17202	Mm.229447	NM_016977	ENSMUSG00000047259	Mc4r	Mc4-r	melanocortin 4 receptor	protein-coding
2096	chr1	192745510	192746010	intron (NM_144881, intron 3 of 11)	intron (NM_144881, intron 3 of 11)	25459	NM_144881	226861	Mm.145857	NM_144881	ENSMUSG00000037375	Hhat	2810432O22Rik|AI462858|AP-2CRE|Skn|Tg(TFAP2A-cre)1Will	hedgehog acyltransferase	protein-coding
25019	chr5	110023689	110024269	Intergenic	RLTR46B|LTR|ERVK	27452	NM_145563	69504	Mm.441438	NM_145563	ENSMUSG00000066613	Zfp932	2310001H12Rik|Znf431	zinc finger protein 932	protein-coding
14067	chr17	35673546	35674046	promoter-TSS (NM_010364)	promoter-TSS (NM_010364)	-114	NM_010364	14885	Mm.10182	NM_010364	ENSMUSG00000001524	Gtf2h4	AW545633|BTF2 p52|TFIIH|p44|p52	general transcription factor II H, polypeptide 4	protein-coding
25697	chr5	135957483	135957983	Intergenic	Intergenic	16743	NM_001160366	109267	Mm.332750	NM_001160366	ENSMUSG00000029699	Ssc4d	C330016E03Rik|S4D-SRCRB|SRCRB-S4D|Srcrb4d	scavenger receptor cysteine rich family, 4 domains	protein-coding
14135	chr17	40904127	40904627	TTS (NM_001145060)	TTS (NM_001145060)	9973	NM_001145060	435528	Mm.359622	NM_001145060	ENSMUSG00000091043	Glyatl3	EG435528|Gm5683	glycine-N-acyltransferase-like 3	protein-coding
14081	chr17	35879439	35879939	promoter-TSS (NM_026987)	promoter-TSS (NM_026987)	-89	NM_026987	69192	Mm.390986	NM_026987	ENSMUSG00000024422	Dhx16	2410006N22Rik|DBP2|Ddx16|mKIAA0577	DEAH (Asp-Glu-Ala-His) box polypeptide 16	protein-coding
3411	chr10	90804584	90805084	intron (NM_181398, intron 3 of 9)	intron (NM_181398, intron 3 of 9)	228143	NM_001177396	77531	Mm.440605	NM_181398	ENSMUSG00000058589	Anks1b	AIDA-1b|C030032C09Rik|E530015N03Rik|ENSMUSG00000078431|Gm10937|Gm1555	ankyrin repeat and sterile alpha motif domain containing 1B	protein-coding
7758	chr12	109423627	109424127	Intergenic	Intergenic	-28946	NR_033813	13386	Mm.157069	NM_010052	ENSMUSG00000040856	Dlk1	AW742678|DLK-1|DlkI|FA1|Ly107|Peg9|SCP1|ZOG|pG2|pref-1	delta-like 1 homolog (Drosophila)	protein-coding
14068	chr17	35699746	35700246	intron (NM_007584, intron 1 of 17)	intron (NM_007584, intron 1 of 17)	594	NM_001198833	12305	Mm.5021	NM_007584	ENSMUSG00000003534	Ddr1	6030432F18|AI323681|CD167a|Cak|Nep|PTK3A	discoidin domain receptor family, member 1	protein-coding
14146	chr17	43012674	43013175	Intergenic	B3|SINE|B2	-3631	NM_178589	94185	Mm.200792	NM_178589	ENSMUSG00000023915	Tnfrsf21	AA959878|DR6|R74815|TR7	tumor necrosis factor receptor superfamily, member 21	protein-coding
13792	chr17	29459445	29459945	Intergenic	Intergenic	-31350	NM_008842	18712	Mm.405293	NM_008842		Pim1	Pim-1	proviral integration site 1	protein-coding
19633	chr2	177497906	177498406	promoter-TSS (NR_036450)	promoter-TSS (NR_036450)	-70	NR_036450	433520	Mm.425117	NM_001024825		Gm14403	OTTMUSG00000016571	predicted gene 14403	ncRNA
13874	chr17	31658564	31659064	promoter-TSS (NM_001163769)	promoter-TSS (NM_001163769)	-60	NM_001163769	108121	Mm.379289	NM_024187	ENSMUSG00000061613	U2af1	2010107D16Rik|35kDa	U2 small nuclear ribonucleoprotein auxiliary factor (U2AF) 1	protein-coding
14082	chr17	35896918	35897418	TTS (NM_001142744)	TTS (NM_001142744)	210	NM_001033630	69662	Mm.260159	NM_001033630	ENSMUSG00000050705	2310061I04Rik	-	RIKEN cDNA 2310061I04 gene	protein-coding
6898	chr12	49383628	49384128	5' UTR (NM_001160112, exon 1 of 1)	5' UTR (NM_001160112, exon 1 of 1)	871	NM_008241	15228	Mm.4704	NM_008241	ENSMUSG00000020950	Foxg1	2900064B05Rik|BF-1|Bf1|Hfh9|Hfhbf1	forkhead box G1	protein-coding
13703	chr17	27623307	27623807	promoter-TSS (NM_019837)	promoter-TSS (NM_019837)	-105	NM_019837	56409	Mm.144699	NM_019837	ENSMUSG00000024213	Nudt3	1110011B09Rik|AA960325|Dipp|Dipp1	nudix (nucleotide diphosphate linked moiety X)-type motif 3	protein-coding
14208	chr17	45766826	45767457	Intergenic	Intergenic	-33297	NM_028164	72240	Mm.482897	NM_028164	ENSMUSG00000094690	1600014C23Rik	-	RIKEN cDNA 1600014C23 gene	protein-coding
26094	chr5	150196120	150196622	Intergenic	Intergenic	-63559	NM_172887	320365	Mm.216590	NM_172887	ENSMUSG00000056602	Fry	13CDNA73|9330186A19Rik|AF346502|AI462658|C87180|D930046M03|cg003|mKIAA4143	furry homolog (Drosophila)	protein-coding
29316	chr7	82938253	82938753	intron (NR_045855, intron 3 of 3)	intron (NR_045855, intron 3 of 3)	32888	NR_045855	71285	Mm.76818	NR_045855		4933430H16Rik	-	RIKEN cDNA 4933430H16 gene	ncRNA
30325	chr7	143437738	143438238	Intergenic	CpG	23062	NM_009876	12577	Mm.168789	NM_009876	ENSMUSG00000037664	Cdkn1c	AL024410|CDKI|Kip2|p57(kip2)|p57Kip2	cyclin-dependent kinase inhibitor 1C (P57)	protein-coding
29401	chr7	96151262	96151762	Intergenic	Intergenic	-59125	NM_011858	23966	Mm.254610	NM_011858	ENSMUSG00000048078	Tenm4	Doc4|ELM2|Odz4|R75022|Ten-m4|l(7)-3Rn|l7Rn3|mKIAA1302	teneurin transmembrane protein 4	protein-coding
8110	chr13	19523652	19524152	Intergenic	Intergenic	95928	NM_134065	105298	Mm.275054	NM_134065	ENSMUSG00000002808	Epdr1	AU040950|AV006210|Epdm2|Epdr2|MERP-1|MERP-2|MERP2|Ucc1	ependymin related protein 1 (zebrafish)	protein-coding
28094	chr7	12803378	12803878	TTS (NM_026046)	TTS (NM_026046)	15232	NM_026046	67230	Mm.333574	NM_026046	ENSMUSG00000057894	Zfp329	2810439M05Rik|4632409L22Rik|ZNF329	zinc finger protein 329	protein-coding
25468	chr5	124205104	124205604	intron (NM_011256, intron 2 of 24)	intron (NM_011256, intron 2 of 24)	-18172	NM_001289472	19679	Mm.44261	NM_011256	ENSMUSG00000029406	Pitpnm2	NIR3|RDGBA2|Rdgb2|mKIAA1457	phosphatidylinositol transfer protein, membrane-associated 2	protein-coding
34571	chrX	94182873	94183373	Intergenic	MTEb-int|LTR|ERVL-MaLR	29528	NM_012010	26905	Mm.218851	NM_012010	ENSMUSG00000035150	Eif2s3x	AA409828|AA547477|AI314668|Eif-2gx	eukaryotic translation initiation factor 2, subunit 3, structural gene X-linked	protein-coding
29134	chr7	71705350	71705850	Intergenic	CpG	600995	NM_001024703	244049	Mm.217412	NM_001024703	ENSMUSG00000032776	Mctp2	Gm489	multiple C2 domains, transmembrane 2	protein-coding
2989	chr10	75365146	75365646	Intergenic	RLTR16|LTR|ERVK	13341	NR_033602	544707	Mm.349862	NR_033602		Gm5779	EG544707	ribosomal protein, large, P0 pseudogene	pseudo
13812	chr17	29896115	29896615	Intergenic	Intergenic	-8483	NM_001081160	74762	Mm.40901	NM_001081160	ENSMUSG00000043557	Mdga1	1200011I03Rik|GPIM|Mamdc3	MAM domain containing glycosylphosphatidylinositol anchor 1	protein-coding
6576	chr12	8227106	8227606	exon (NM_172401, exon 3 of 7)	exon (NM_172401, exon 3 of 7)	19229	NM_001167767	68832	Mm.25608	NM_172401	ENSMUSG00000037669	1110057K04Rik	LDAH	RIKEN cDNA 1110057K04 gene	protein-coding
14293	chr17	47646679	47647179	intron (NM_198421, intron 1 of 6)	B3A|SINE|B2	16239	NM_198421	224836	Mm.59393	NM_198421		Usp49	C330046L10Rik|Gm545	ubiquitin specific peptidase 49	protein-coding
33221	chr9	65201410	65202092	Intergenic	U5|snRNA|snRNA	-12939	NM_177460	214424	Mm.31129	NM_177460	ENSMUSG00000032392	Parp16	ARTD15|BC055447|C79952|PARP-16	poly (ADP-ribose) polymerase family, member 16	protein-coding
3561	chr10	108537550	108538052	intron (NM_001252341, intron 10 of 11)	intron (NM_001252341, intron 10 of 11)	162359	NM_203660	368203	Mm.452758	NM_203660		Gm5136	C6.1AL|EG368203	predicted gene 5136	protein-coding
30655	chr8	24561698	24562198	intron (NM_145949, intron 1 of 9)	LTRIS2|LTR|ERV1	14385	NM_145949	209176	Mm.219580	NM_145949	ENSMUSG00000031549	Ido2	AI265623|C230043N17Rik|Ido-2|Indol1	indoleamine 2,3-dioxygenase 2	protein-coding
22690	chr4	117189963	117190463	Intergenic	Intergenic	-7589	NM_134471	73804	Mm.247651	NM_134471	ENSMUSG00000028678	Kif2c	4930402F02Rik|ESTM5|Knsl6|MCAK|X83316	kinesin family member 2C	protein-coding
13998	chr17	34603907	34604407	promoter-TSS (NM_019403)	promoter-TSS (NM_019403)	-596	NM_019403	54197	Mm.274542	NM_019403	ENSMUSG00000015478	Rnf5	2410131O05Rik|AA407576|NG2	ring finger protein 5	protein-coding
13929	chr17	33033160	33033660	promoter-TSS (NM_028543)	promoter-TSS (NM_028543)	-29	NM_028543	73451	Mm.129453	NM_028543	ENSMUSG00000067430	Zfp763	1700065O13Rik|AI839635	zinc finger protein 763	protein-coding
14116	chr17	37050312	37050812	intron (NM_019439, intron 5 of 22)	intron (NM_019439, intron 5 of 22)	4596	NM_019439	54393	Mm.32191	NM_019439	ENSMUSG00000024462	Gabbr1	GABAB1|GABAbR1|bM573K1.1	gamma-aminobutyric acid (GABA) B receptor, 1	protein-coding
14247	chr17	46629989	46630489	promoter-TSS (NM_175168)	promoter-TSS (NM_175168)	-735	NM_175168	71461	Mm.181833	NM_175168	ENSMUSG00000023972	Ptk7	8430404F20Rik|chz|mPTK7/CCK4	PTK7 protein tyrosine kinase 7	protein-coding
14165	chr17	44165894	44166394	Intergenic	Intergenic	-22428	NM_172621	224796	Mm.37666	NM_172621	ENSMUSG00000023959	Clic5	5730531E12Rik|B330005L24|Gm322|jbg	chloride intracellular channel 5	protein-coding
2190	chr10	7432679	7433179	Intergenic	MMETn-int|LTR|ERVK	40548	NM_029975	77777	Mm.442442	NM_029975	ENSMUSG00000079685	Ulbp1	A430108B07Rik|MULT1	UL16 binding protein 1	protein-coding
14257	chr17	46772474	46772974	promoter-TSS (NM_025966)	promoter-TSS (NM_025966)	89	NM_025966	67101	Mm.358702	NM_025966	ENSMUSG00000062619	2310039H08Rik	-	RIKEN cDNA 2310039H08 gene	protein-coding
14206	chr17	45736576	45737076	Intergenic	Intergenic	-2982	NM_028164	72240	Mm.482897	NM_028164	ENSMUSG00000094690	1600014C23Rik	-	RIKEN cDNA 1600014C23 gene	protein-coding
7187	chr12	76216757	76217257	exon (NM_001159532, exon 5 of 9)	exon (NM_001159532, exon 5 of 9)	29739	NM_019784	80384	Mm.78551	NM_019784	ENSMUSG00000021056	Tex21	4931406F04Rik|4931412D23Rik|4931421K24Rik|tsec-2	testis expressed gene 21	protein-coding
10312	chr14	68125452	68125952	promoter-TSS (NM_008691)	promoter-TSS (NM_008691)	-698	NM_008691	18040	Mm.242832	NM_008691	ENSMUSG00000022054	Nefm	NF-M|NF160|NF165|Nef3|Nfm	neurofilament, medium polypeptide	protein-coding
10345	chr14	70079693	70080193	3' UTR (NM_001289925, exon 3 of 3)	3' UTR (NM_001289925, exon 3 of 3)	2148	NM_001289927	13655	Mm.103737	NM_018781	ENSMUSG00000033730	Egr3	Pilot	early growth response 3	protein-coding
14036	chr17	35236253	35236753	promoter-TSS (NM_023179)	promoter-TSS (NM_023179)	-93	NM_023179	66237	Mm.396107	NM_023179	ENSMUSG00000024403	Atp6v1g2	1500002D01Rik|Atp6g2|NG38|VAG2	ATPase, H+ transporting, lysosomal V1 subunit G2	protein-coding
13999	chr17	34605597	34606097	promoter-TSS (NM_001163379)	promoter-TSS (NM_001163379)	-14	NM_001163379	55979	Mm.8684	NM_018862	ENSMUSG00000034254	Agpat1	1-AGP|1-AGPAT|AW047140	1-acylglycerol-3-phosphate O-acyltransferase 1 (lysophosphatidic acid acyltransferase, alpha)	protein-coding
13705	chr17	27635103	27635603	promoter-TSS (NM_025963)	promoter-TSS (NM_025963)	-111	NM_025963	67097	Mm.275810	NM_025963	ENSMUSG00000052146	Rps10	2210402A09Rik	ribosomal protein S10	protein-coding
7899	chr12	113610890	113611390	Intergenic	Intergenic	67232	NM_174885	238406	Mm.188683	NM_174885	ENSMUSG00000043945	Adam6a	Adam6|tMDCIV	a disintegrin and metallopeptidase domain 6A	protein-coding
3744	chr10	123013377	123013877	exon (NM_001163025, exon 26 of 34)	exon (NM_001163025, exon 26 of 34)	-27903	NR_029527	387251		NR_029527	miRBase:MI0000138	Mirlet7i	Mirnlet7i|mmu-let-7i	microRNA let7i	ncRNA
26066	chr5	149039776	149040276	Intergenic	RLTR31D_MM|LTR|ERVK	13011	NM_010439	15289	Mm.207047	NM_010439	ENSMUSG00000066551	Hmgb1	DEF|HMG-1|Hmg1|SBP-1|amphoterin|p30	high mobility group box 1	protein-coding
14033	chr17	35195575	35196075	TTS (NR_105939)	TTS (NR_105939)	853	NR_105939	102465588		NR_105939		Mir6973a	mmu-mir-6973a	microRNA mir-6973a	ncRNA
13974	chr17	34127448	34127948	intron (NM_010386, intron 1 of 5)	intron (NM_010386, intron 1 of 5)	4866	NM_010386	14998	Mm.16373	NM_010386	ENSMUSG00000037649	H2-DMa	H-2Ma|H2-Ma	histocompatibility 2, class II, locus DMa	protein-coding
26712	chr6	57535338	57535838	promoter-TSS (NM_175523)	promoter-TSS (NM_175523)	-162	NM_175523	243382	Mm.396893	NM_175523	ENSMUSG00000037826	Ppm1k	2900063A19Rik|A930026L03Rik|PP2Cm	protein phosphatase 1K (PP2C domain containing)	protein-coding
13973	chr17	34119254	34119754	non-coding (NR_037970, exon 1 of 13)	non-coding (NR_037970, exon 1 of 13)	396	NR_037970	14312	Mm.3444	NM_010238	ENSMUSG00000024335	Brd2	AW228947|D17H6S113E|Frg-1|Fsrg-1|Fsrg1|Nat|Ring3|Rnf3|mKIAA4005	bromodomain containing 2	protein-coding
16360	chr19	29067013	29067513	promoter-TSS (NR_045687)	promoter-TSS (NR_045687)	-38	NR_045687	100503337	Mm.103412	NR_045687		Gm9895	ENSMUSG00000052976	predicted gene 9895	ncRNA
13997	chr17	34592670	34593170	intron (NM_017463, intron 1 of 8)	intron (NM_017463, intron 1 of 8)	449	NM_017463	18515	Mm.390957	NM_017463	ENSMUSG00000034673	Pbx2	AU043397|G17	pre B cell leukemia homeobox 2	protein-coding
25995	chr5	145301705	145302205	Intergenic	RLTR9D|LTR|ERVK	18612	NM_001081431	666311	Mm.260773	NM_001081431	ENSMUSG00000070420	Zscan25	EG666311|Zfp498	zinc finger and SCAN domain containing 25	protein-coding
13387	chr17	10626618	10627118	intron (NM_027032, intron 2 of 4)	intron (NM_027032, intron 2 of 4)	170652	NR_077238	319750	Mm.383485	NR_077237	ENSMUSG00000089633	A230009B12Rik	-	RIKEN cDNA A230009B12 gene	ncRNA
8147	chr13	21259607	21260107	Intergenic	Intergenic	32829	NM_010343	14780	Mm.1332	NM_010343	ENSMUSG00000004344	Gpx5	AV379049|Arep	glutathione peroxidase 5	protein-coding
14077	chr17	35841258	35841758	promoter-TSS (NM_001010833)	promoter-TSS (NM_001010833)	10	NM_001010833	240087	Mm.218511	NM_001010833	ENSMUSG00000061607	Mdc1	6820401C03|AA413496|Nfbd1|mKIAA0170	mediator of DNA damage checkpoint 1	protein-coding
29908	chr7	125393557	125394058	Intergenic	CpG	24946	NM_001145759	75861	Mm.349600	NM_001145759	ENSMUSG00000090457	4930571K23Rik	AI428146	RIKEN cDNA 4930571K23 gene	protein-coding
28729	chr7	39761641	39762141	Intergenic	Intergenic	244125	NM_001004139	70227	Mm.333800	NM_001004139	ENSMUSG00000068959	Zfp619	3000002G13Rik	zinc finger protein 619	protein-coding
22081	chr4	55530232	55530735	exon (NM_010637, exon 3 of 5)	exon (NM_010637, exon 3 of 5)	1992	NM_010637	16600	Mm.4325	NM_010637	ENSMUSG00000003032	Klf4	EZF|Gklf|Zie	Kruppel-like factor 4 (gut)	protein-coding
13932	chr17	33394420	33394920	promoter-TSS (NM_009542)	promoter-TSS (NM_009542)	-33	NM_009542	22643	Mm.4417	NM_009542	ENSMUSG00000055240	Zfp101	AI316498|AI325003	zinc finger protein 101	protein-coding
14167	chr17	44256535	44257035	intron (NM_172621, intron 4 of 5)	intron (NM_172621, intron 4 of 5)	68213	NM_172621	224796	Mm.37666	NM_172621	ENSMUSG00000023959	Clic5	5730531E12Rik|B330005L24|Gm322|jbg	chloride intracellular channel 5	protein-coding
34735	chrX	135601587	135602087	Intergenic	Intergenic	-7982	NM_130888	170722	Mm.103373	NM_130888	ENSMUSG00000031410	Nxf7	Nx7|Nxf6|nfx-a1|nxf-a|nxf-a2	nuclear RNA export factor 7	protein-coding
21453	chr3	153675044	153675544	intron (NM_011372, intron 1 of 4)	intron (NM_011372, intron 1 of 4)	49839	NM_011372	20447	Mm.440929	NM_011372		St6galnac3	Siat7c	ST6 (alpha-N-acetyl-neuraminyl-2,3-beta-galactosyl-1,3)-N-acetylgalactosaminide alpha-2,6-sialyltransferase 3	protein-coding
30157	chr7	136339635	136340135	intron (NR_040459, intron 4 of 4)	ORR1D2|LTR|ERVL-MaLR	9530	NR_040459	330664	Mm.127762	NR_040459		C230079O03Rik	C230079O03	RIKEN cDNA C230079O03 gene	ncRNA
13980	chr17	34197392	34197892	promoter-TSS (NM_010724)	promoter-TSS (NM_010724)	-553	NM_010724	16913	Mm.180191	NM_010724		Psmb8	Lmp-7|Lmp7	proteasome (prosome, macropain) subunit, beta type 8 (large multifunctional peptidase 7)	protein-coding
11425	chr15	76158297	76158798	Intergenic	Intergenic	-31991	NM_001142968	271278	Mm.205253	NM_198172	ENSMUSG00000044361	BC024139	6230424I18Rik	cDNA sequence BC024139	protein-coding
13953	chr17	33909131	33909631	promoter-TSS (NM_001199733)	promoter-TSS (NM_001199733)	-64	NM_007829	13163	Mm.271809	NM_007829	ENSMUSG00000002307	Daxx	-	Fas death domain-associated protein	protein-coding
25304	chr5	119741045	119741545	Intergenic	Intergenic	-50077	NR_040416	433944	Mm.491053	NR_040416	ENSMUSG00000086847	Tbx3os2	Gm16065|OTTMUSG00000029666	T-box 3, opposite strand 2	ncRNA
303	chr1	36707854	36708354	intron (NM_146107, intron 2 of 10)	intron (NM_146107, intron 2 of 10)	1821	NM_146107	226977	Mm.28521	NM_146107	ENSMUSG00000037351	Actr1b	2310066K23Rik|AA960180|AI851923|Arp1b	ARP1 actin-related protein 1B, centractin beta	protein-coding
13940	chr17	33628877	33629377	promoter-TSS (NM_026712)	promoter-TSS (NM_026712)	35	NM_026712	328801	Mm.181488	NM_026712	ENSMUSG00000073423	Zfp414	0610030H11Rik|Znf414	zinc finger protein 414	protein-coding
31401	chr8	86550476	86550976	intron (NM_172912, intron 7 of 28)	intron (NM_172912, intron 7 of 28)	15864	NM_172912	244562	Mm.67485	NM_172912	ENSMUSG00000036872	Abcc12	4930467B22Rik|MRP9	ATP-binding cassette, sub-family C (CFTR/MRP), member 12	protein-coding
14183	chr17	45478420	45478920	Intergenic	Intergenic	-3732	NM_027649	71020	Mm.44257	NM_027649	ENSMUSG00000023935	Spats1	1700011H05Rik|4933400B06Rik|Daip2|Ddip|Srsp1	spermatogenesis associated, serine-rich 1	protein-coding
13704	chr17	27629219	27629719	TTS (NM_025963)	TTS (NM_025963)	5773	NM_025963	67097	Mm.275810	NM_025963	ENSMUSG00000052146	Rps10	2210402A09Rik	ribosomal protein S10	protein-coding
13906	chr17	32350389	32350889	promoter-TSS (NM_017476)	promoter-TSS (NM_017476)	-62	NM_017476	54194	Mm.281005	NM_017476	ENSMUSG00000002625	Akap8l	HAP95|Nakap95	A kinase (PRKA) anchor protein 8-like	protein-coding
