# Supplementary material for: Differential ERK activity shapes the epiblast methylome influencing cell-context response to germ-layer differentiation signals.
Source: Research Square preprint supplement (doi:10.21203/rs.3.rs-3092600/v1), 2023-06-26
Supplement: Supplementary file 22 [file Supplementary Data 8.xlsx]

## Sheet: DMG_WTvsPbx1KO_EpiSCs
1110017D15Rik
1600014C10Rik
1700008O03Rik
1700010L04Rik
1700015G11Rik
1700022I11Rik
1700028J19Rik
1700039E15Rik
1700084C01Rik
1700120B22Rik
2310016G11Rik
2410076I21Rik
2610020H08Rik
3110039M20Rik
3110040N11Rik
3222401L13Rik
4930481A15Rik
4930533L02Rik
4930571K23Rik
4931406B18Rik
4931429P17Rik
4933405O20Rik
4933440M02Rik
5730596B20Rik
5830415F09Rik
6030445D17Rik
9030624J02Rik
9130008F23Rik
9130019O22Rik
9230102O04Rik
9330171B17Rik
9930013L23Rik
A230065N10Rik
A530021J07Rik
A630001G21Rik
A630091E08Rik
A830073O21Rik
A830092H15Rik
Abca14
Abcc3
Abcc6
Abcc8
Abcg2
Abhd17c
Abhd2
Acan
Acpt
Acsm1
Acsm3
Acsm4
Actn4
Adam12
Adam6a
Adamts17
Adamtsl3
Adcy3
Adra2a
Adrb2
Aen
Afap1
Aff1
Agbl1
AI464131
AI467606
Ajap1
Akap13
Akt1s1
Aldh16a1
Aldh1a3
Alpk3
Alx3
Amotl1
Ankrd27
Anks4b
Ano5
Ap2a1
Ap3b2
Apba2
Apob
Aqp3
Arhgap24
Arhgap27
Arhgap9
Arhgef28
Arid1a
Arid4a
Arid5b
Arl6ip1
Arnt2
Arrdc4
Asb7
Atad2b
Atf5
Atp10a
Atp12a
Atp2a1
Atp5l-ps1
Atp5s
Atp8b5
Atxn7l2
Avil
B020031M17Rik
B230325K18Rik
B4galnt1
Bach2
Bag3
Barhl1
Barx1
Bax
BC017158
BC048679
BC107364
Bccip
Bcl2l12
Bcl7c
Blm
Bmp3
Bnc1
Bst2
Btaf1
C530025M09Rik
Cacng3
Cadm1
Cadm2
Camk2b
Camkmt
Car10
Car11
Car9
Casp16
Cbln1
Cbln2
Ccdc106
Ccdc114
Ccdc155
Ccdc53
Ccdc81
Ccdc83
Ccdc90b
Ccin
Ccl27a
Ccne1
Ccp110
Ccr1
Cd19
Cd302
Cd33
Cd37
Cd72
Cdc27
Cdc42
Cdc6
Cdk5rap1
Cdk5rap2
Cdk8
Cdkl1
Ceacam10
Ceacam18
Cenpf
Cep89
Cerk
Cers3
Chd2
Chrna7
Chsy1
Cib1
Cidea
Clcn4-2
Cldnd2
Clec11a
Clta
Cnnm2
Cnot6l
Cnp
Cntfr
Cog7
Col25a1
Col26a1
Coq7
Coro1a
Cox6a2
Cpeb1
Cpped1
Cpt1c
Creb3
Crhbp
Crhr1
Crip1
Crtc3
Cryba4
Crym
Csrp3
Cstf2t
Ctbp2
Ctdsp2
Ctf2
Ctnna3
Ctsc
Ctsf
Ctu1
Ctxn2
Cyfip1
Cyp27b1
Cyth2
D10Bwg1379e
D430042O09Rik
D7Ertd443e
D830013O20Rik
Daam1
Dact1
Dapk2
Dbp
Dbx1
Dcaf7
Dctn2
Dctn3
Dctn5
Ddit3
Ddx47
Det1
Dhdh
Dhx32
Dio3
Dkk2
Dkkl1
Dlg2
Dnahc3
Dnaic1
Dnajb5
Dnajc1
Dnajc12
Dock1
Dpy19l3
Dram1
Dsg2
Dtx3
Duoxa2
Dusp26
E030018B13Rik
E130304I02Rik
E2f8
Ednrb
Eed
Eftud2
Egr2
Eid1
Elfn2
Emb
Emp3
En1
Enho
Erc2
Erdr1
Ern2
Esr2
Esrrg
Esx1
Etfb
Ets1
Evx2
Exoc3l
Fabp3
Fah
Faim
Fam103a1
Fam110c
Fam132a
Fam154b
Fam166b
Fam174a
Fam175b
Fam189a1
Fam196a
Fam19a2
Fam19a3
Fam210b
Fam214b
Fam219a
Fam221b
Fam53b
Fam57b
Fam83e
Fam86
Fan1
Fancf
Fanci
Fank1
Fbll1
Fbln7
Fcgr1
Fcgrt
Fes
Fgf4
Fgfr2
Fndc3b
Foxa2
Foxc1
Foxd3
Foxf2
Foxp4
Fsd2
Ftl1
Furin
Fuz
Fzd7
Gabra5
Gabrb3
Gabrg3
Gad1
Galr2
Gap43
Gas2
Gata2
Gata4
Gata5
Gatsl2
Gde1
Gfap
Gga2
Glipr2
Glra1
Gls2
Gm10109
Gm10118
Gm10160
Gm10545
Gm10610
Gm10742
Gm10748
Gm10797
Gm10974
Gm12789
Gm14443
Gm15446
Gm16477
Gm19402
Gm2058
Gm21957
Gm3086
Gm3727
Gm5069
Gm5093
Gm5114
Gm5435
Gm5591
Gm581
Gm5849
Gm6327
Gm6483
Gm7075
Gm7951
Gm7964
Gm9041
Gm9476
Gnb2
Gne
Gp1bb
Gp2
Gpr139
Gpr182
Gprc5b
Gpx5
Grhl2
Grin2d
Grwd1
Gsg1l
Gtf2h1
Gtf2i
Gtf3c1
Gys1
H2-Q7
Hadh
Hand1
Hapln3
Hcn1
Hcrtr2
Hddc3
Hdgfrp3
Hebp1
Helb
Hephl1
Herc2
Herc4
Hey1
Hhip
Hif1a
Homer2
Hoxa1
Hoxa2
Hoxa4
Hoxa5
Hoxa7
Hoxc13
Hoxc4
Hps5
Hrc
Hrct1
Hsd17b6
Hspa4
Hspb1
Hspg2
Htatip2
I830012O16Rik
Ica1
Idh2
Ifitm10
Igf1r
Iglon5
Ikzf2
Il16
Il21
Il21r
Il33
Il4ra
Inpp5f
Insl3
Iqck
Iqgap1
Irf2bp2
Irf2bpl
Irf3
Irx4
Irx5
Isg20
Isl1
Itga1
Itgad
Itgal
Itgam
Itgax
Itpripl2
Izumo2
Kcna7
Kcnc1
Kcnc2
Kcnc3
Kcnj10
Kcnj11
Kcnj15
Kcnk2
Kdelr1
Kdm8
Kif1b
Kif21b
Kif5a
Klf13
Klhl25
Klhl29
Klk10
Klk12
Klk13
Klk14
Klk15
Klk1b1
Klk1b11
Klk1b16
Klk1b21
Klk1b22
Klk1b24
Klk1b27
Klk1b5
Klk1b7-ps
Klk4
Klk5
Klk6
Klk7
Klk8
Knop1
l7Rn6
Lamb2
Lat
Lcorl
Lcp1
Ldha
Ldhc
Lect1
Lef1
Leng1
Lhb
Lhfp
Lhpp
Lhx3
Lin7b
Lins
Lmf1
Lmo1
Lmo3
Lmtk3
Lmx1a
Lphn2
Lrig3
Lrp1
Lrrc28
Lrrc4b
Lrriq1
Lrrk1
Lrrtm3
Lsamp
Luzp2
Lysmd4
Mab21l1
Mad2l1bp
Magel2
Magohb
Man1a
Man2a2
Man2b2
Map4k1
Mapk3
Mapk9
Mapkapk2
March10
Mars
Mbd6
Mcc
Mcee
Mcmbp
Mdfic
Mdga2
Me3
Med13l
Med25
Mef2a
Mef2c
Meis2
Mesdc1
Mesp2
Metap1d
Mettl24
Mex3b
Mex3c
Mfge8
Mgmt
Mid1
Mip
Mkrn3
Mmp10
Mmp1b
Mnx1
Mocos
Mon2
Mrgpra1
Mrgpra4
Mrgpra6
Mrgpra9
Mrgprb1
Mrgprb3
Mrgprb4
Mrgprb5
Mrgprb8
Mrgprx1
Mrgprx3-ps
Mrpl23
Mrps11
Msi2
Msmp
Mtmr10
Mug1
Myh14
Myo1a
Myod1
Mypn
N28178
Nab2
Nav2
Ndn
Ndnl2
Ndufab1
Necab1
Nefm
Nell1
Nell2
Nfatc2ip
Ngf
Nipa1
Nipa2
Nkx2-6
Nmb
Nomo1
Nosip
Notch3
Nox4
Npr2
Nps
Nqo1
Nr2e1
Nr2f2
Nr4a2
Nr4a3
Nrbf2
Nsg1
Nsmce1
Nt5c3b
Ntf5
Ntrk3
Nucb1
Nudt19
Nup62
Oca2
Olfr156
Olfr157
Olfr159
Olfr222
Olfr291
Olfr292
Olfr293
Olfr295
Olfr70
Olfr71
Olfr898
Olfr94
Olig3
Oma1
Onecut1
Os9
Otog
Otud7a
Papss1
Parp8
Parvb
Pax1
Pax6
Pax8
Pcdhga11
Pcsk6
Pdcd5
Pdf
Pdia5
Peg12
Penk
Pgpep1l
Phox2b
Phrf1
Picalm
Pigo
Pigz
Pih1d1
Pip4k2c
Pkd2l2
Pkdcc
Plagl1
Plau
Pld6
Plekha3
Plekhf1
Plekhm1
Plk1
Plxnc1
Plxnd1
Pnkp
Polg
Pop4
Pou3f3
Ppapdc1a
Ppfia3
Ppp1r15a
Ppp1r1b
Ppp4c
Pqlc1
Prc1
Prdm8
Prkch
Prmt3
Prr12
Prr5
Prrg2
Prss38
Psap
Ptf1a
Ptgis
Pth2
Ptov1
Ptpn13
Ptpn14
Ptpn5
Ptpre
Ptprs
Pycard
Pygl
Qdpr
Qprt
Rab38
Rasal1
Rasgrp1
Rassf4
Rbms2
Rccd1
Rcn3
Rdh1
Rdh16
Reck
Reep3
Repin1
Rgma
Rgp1
Rgs10
Rhcg
Ribc2
Rlbp1
Rnf17
Rnf207
Rnf220
Rnf38
Rngtt
Robo1
Ror2
Rpl13a
Rpl18
Rpp25l
Rps11
Rps15a
Rps29
Rras
Rsad1
Rusc2
Ruvbl2
S100a8
Saa1
Saa2
Saa4
Saal1
Sall2
Sav1
Sbk1
Scaf1
Scly
Scnn1b
Scyl1
Sdcbp2
Sdr9c7
Sec1
Sec11a
Sec23ip
Sema4b
Sergef
Sesn2
Sez6
Sh2b1
Sh3gl3
Shank1
Shkbp1
Siglece
Siglecg
Siglech
Sim1
Sirt1
Sit1
Six4
Skap1
Slc10a4
Slc15a5
Slc16a7
Slc17a6
Slc17a7
Slc1a2
Slc22a12
Slc22a29
Slc26a10
Slc32a1
Slc35f1
Slc35g2
Slc46a1
Slc5a2
Slc6a16
Slc6a2
Slc6a5
Slc7a9
Slco3a1
Slco6c1
Slfn3
Smad2
Smad9
Smg1
Smyd2
Snrnp70
Snrpa1
Snrpn
Snurf
Snx11
Socs1
Sox5
Sp6
Sp9
Spaca4
Spag17
Spag8
Spag9
Spata16
Spata32
Spatc1
Sphk2
Spryd4
Spty2d1
Srcap
Srcrb4d
Srek1ip1
St6gal2
St8sia1
St8sia2
Stard13
Stat6
Stip1
Stk11
Ston2
Sult2b1
Sv2b
Svip
Syngr4
Synm
Syt17
Syt3
Syt6
Sytl2
Tac2
Tarsl2
Tbc1d10a
Tbc1d17
Tbx20
Tbx3
Tbx4
Tbx5
Tcf21
Tcstv3
Tdrd12
Tead2
Tfap2b
Tgfb1i1
Tgfbr2
Tgif1
Tial1
Ticrr
Timeless
Tjp1
Tln1
Tm2d3
Tm6sf1
Tmc5
Tmc7
Tmem100
Tmem126b
Tmem132c
Tmem132d
Tmem135
Tmem143
Tmem159
Tmem194
Tmem209
Tmem30b
Tmem33
Tmem86a
Tmem8b
Tmem98
Tmprss12
Tnfrsf1b
Tob1
Tomm20l
Tph1
Tpm1
Tpm2
Tpp1
Trhr2
Trim7
Trim72
Trmt5
Trp63
Trp73
Trpm1
Trpm4
Tsfm
Tsg101
Tshz3
Tsks
Tspan11
Ttc23
Ttll3
Tubgcp5
Tufm
Tulp2
Twist1
Tyr
Ube3a
Ubfd1
Ubr5
Uevld
Umod
Unc13b
Unc13c
Unc45a
Unc5d
Uri1
Uros
Ush1c
Usp54
Vax1
Vimp
Vmn2r68
Vmn2r70
Vmn2r71
Vmn2r73
Vmn2r74
Vmn2r75
Vmn2r79
Vmn2r87
Vps33b
Vps37c
Vrk3
Vsig10l
Vstm2b
Wdr1
Wdr11
Wdr7
Wdr73
Wfikkn2
Whamm
Xpo6
Xrcc6bp1
Zbtb39
Zcchc7
Zdbf2
Zdhhc13
Zfand6
Zfp322a
Zfp365
Zfp473
Zfp507
Zfp536
Zfp592
Zfp619
Zfp628
Zfp629
Zfp658
Zfp703
Zfp719
Zfp768
Zfp819
Zfp939
Zg16
Zic1
Zic4
Zic5
Zp2
Zranb1
Zscan2
Zscan4d
