# Supplementary material for: Differential ERK activity shapes the epiblast methylome influencing cell-context response to germ-layer differentiation signals.
Source: Research Square preprint supplement (doi:10.21203/rs.3.rs-3092600/v1), 2023-06-26
Supplement: Supplementary file 25 [file Supplementary Data 9.xlsx]

## Sheet: string_interactions
#node1	node2	node1_string_id	node2_string_id	neighborhood_on_chromosome	gene_fusion	phylogenetic_cooccurrence	homology	coexpression	experimentally_determined_interaction	database_annotated	automated_textmining	combined_score
Braf	Ets2	10090.ENSMUSP00000002487	10090.ENSMUSP00000023612	0	0	0	0	0	0.263	0.108	0.177	0.412
Braf	Ets1	10090.ENSMUSP00000002487	10090.ENSMUSP00000034534	0	0	0	0	0	0.263	0.108	0.193	0.423
Braf	Dusp6	10090.ENSMUSP00000002487	10090.ENSMUSP00000020118	0	0	0	0	0.061	0.131	0.114	0.422	0.527
Braf	Jun	10090.ENSMUSP00000002487	10090.ENSMUSP00000102711	0	0	0	0	0	0.137	0.127	0.433	0.535
Braf	Mapk14	10090.ENSMUSP00000002487	10090.ENSMUSP00000004990	0	0	0	0.608	0.064	0.272	0.305	0.495	0.58
Braf	Il17rd	10090.ENSMUSP00000002487	10090.ENSMUSP00000036076	0	0	0	0	0	0.054	0.65	0.074	0.666
Braf	Spry2	10090.ENSMUSP00000002487	10090.ENSMUSP00000022709	0	0	0	0	0	0.178	0.818	0.351	0.894
Braf	Mapk1	10090.ENSMUSP00000002487	10090.ENSMUSP00000065983	0	0	0	0.585	0.067	0.522	0.864	0.604	0.95
Braf	Mapk3	10090.ENSMUSP00000002487	10090.ENSMUSP00000051619	0	0	0	0.582	0.067	0.522	0.864	0.741	0.954
Dnmt3a	Spi1	10090.ENSMUSP00000020991	10090.ENSMUSP00000002180	0	0	0	0	0	0.13	0	0.853	0.867
Dnmt3a	Tet3	10090.ENSMUSP00000020991	10090.ENSMUSP00000087049	0	0	0	0	0.061	0.07	0	0.8	0.81
Dnmt3a	Tet1	10090.ENSMUSP00000020991	10090.ENSMUSP00000133279	0	0	0	0	0.061	0.07	0	0.845	0.853
Dnmt3a	Tet2	10090.ENSMUSP00000020991	10090.ENSMUSP00000096203	0	0	0	0	0.062	0.13	0	0.867	0.882
Dnmt3a	Dnmt3b	10090.ENSMUSP00000020991	10090.ENSMUSP00000105396	0	0	0	0.938	0.064	0.801	0.9	0.923	0.98
Dnmt3b	Spi1	10090.ENSMUSP00000105396	10090.ENSMUSP00000002180	0	0	0	0	0	0.13	0	0.53	0.575
Dnmt3b	Dnmt3a	10090.ENSMUSP00000105396	10090.ENSMUSP00000020991	0	0	0	0.938	0.064	0.801	0.9	0.923	0.98
Dnmt3b	Fgf5	10090.ENSMUSP00000105396	10090.ENSMUSP00000031280	0	0	0	0	0	0	0	0.476	0.476
Dnmt3b	Fgf4	10090.ENSMUSP00000105396	10090.ENSMUSP00000056752	0	0	0	0	0.151	0	0	0.391	0.461
Dnmt3b	Tet3	10090.ENSMUSP00000105396	10090.ENSMUSP00000087049	0	0	0	0	0.061	0.07	0	0.774	0.785
Dnmt3b	Tet2	10090.ENSMUSP00000105396	10090.ENSMUSP00000096203	0	0	0	0	0.061	0.07	0	0.861	0.868
Dnmt3b	Tet1	10090.ENSMUSP00000105396	10090.ENSMUSP00000133279	0	0	0	0	0.097	0.07	0	0.83	0.845
Dusp4	Mapk14	10090.ENSMUSP00000033930	10090.ENSMUSP00000004990	0	0	0	0	0	0.378	0.845	0.446	0.942
Dusp4	Etv4	10090.ENSMUSP00000033930	10090.ENSMUSP00000017868	0	0	0	0	0.094	0.044	0	0.4	0.435
Dusp4	Dusp6	10090.ENSMUSP00000033930	10090.ENSMUSP00000020118	0	0	0	0.79	0.094	0	0.629	0.821	0.709
Dusp4	Fos	10090.ENSMUSP00000033930	10090.ENSMUSP00000021674	0	0	0	0	0.063	0.091	0	0.375	0.421
Dusp4	Spry2	10090.ENSMUSP00000033930	10090.ENSMUSP00000022709	0	0	0	0	0.061	0.042	0	0.53	0.541
Dusp4	Spry4	10090.ENSMUSP00000033930	10090.ENSMUSP00000025295	0	0	0	0	0.062	0.042	0	0.658	0.666
Dusp4	Jun	10090.ENSMUSP00000033930	10090.ENSMUSP00000102711	0	0	0	0	0.052	0.14	0	0.415	0.481
Dusp4	Mapk1	10090.ENSMUSP00000033930	10090.ENSMUSP00000065983	0	0	0	0	0.052	0.402	0.947	0.288	0.976
Dusp4	Mapk3	10090.ENSMUSP00000033930	10090.ENSMUSP00000051619	0	0	0	0	0.052	0.402	0.961	0.598	0.99
Dusp6	Braf	10090.ENSMUSP00000020118	10090.ENSMUSP00000002487	0	0	0	0	0.061	0.131	0.114	0.422	0.527
Dusp6	Mapk14	10090.ENSMUSP00000020118	10090.ENSMUSP00000004990	0	0	0	0	0	0.241	0.629	0.546	0.861
Dusp6	Etv4	10090.ENSMUSP00000020118	10090.ENSMUSP00000017868	0	0	0	0	0.062	0.044	0	0.671	0.679
Dusp6	Etv1	10090.ENSMUSP00000020118	10090.ENSMUSP00000093442	0	0	0	0	0	0.044	0	0.402	0.403
Dusp6	Il17rd	10090.ENSMUSP00000020118	10090.ENSMUSP00000036076	0	0	0	0	0	0	0	0.5	0.499
Dusp6	Jun	10090.ENSMUSP00000020118	10090.ENSMUSP00000102711	0	0	0	0	0.106	0.099	0	0.471	0.537
Dusp6	Fos	10090.ENSMUSP00000020118	10090.ENSMUSP00000021674	0	0	0	0	0.132	0.09	0	0.47	0.545
Dusp6	Dusp4	10090.ENSMUSP00000020118	10090.ENSMUSP00000033930	0	0	0	0.79	0.094	0	0.629	0.821	0.709
Dusp6	Spry4	10090.ENSMUSP00000020118	10090.ENSMUSP00000025295	0	0	0	0	0.08	0.042	0	0.741	0.752
Dusp6	Spry2	10090.ENSMUSP00000020118	10090.ENSMUSP00000022709	0	0	0	0	0.081	0.042	0	0.741	0.752
Dusp6	Mapk3	10090.ENSMUSP00000020118	10090.ENSMUSP00000051619	0	0	0	0	0.052	0.634	0.966	0.728	0.996
Dusp6	Mapk1	10090.ENSMUSP00000020118	10090.ENSMUSP00000065983	0	0	0	0	0.052	0.932	0.966	0.871	0.999
Elf1	Junb	10090.ENSMUSP00000046515	10090.ENSMUSP00000064680	0	0	0	0	0.068	0.132	0	0.374	0.449
Elk1	Mapk14	10090.ENSMUSP00000009550	10090.ENSMUSP00000004990	0	0	0	0	0.061	0.133	0.922	0.049	0.932
Elk1	Junb	10090.ENSMUSP00000009550	10090.ENSMUSP00000064680	0	0	0	0	0	0.2	0.261	0.16	0.46
Elk1	Jun	10090.ENSMUSP00000009550	10090.ENSMUSP00000102711	0	0	0	0	0	0.2	0.676	0.168	0.765
Elk1	Fos	10090.ENSMUSP00000009550	10090.ENSMUSP00000021674	0	0	0	0	0	0.087	0.676	0.372	0.798
Elk1	Mapk3	10090.ENSMUSP00000009550	10090.ENSMUSP00000051619	0	0	0	0	0	0.809	0.966	0.176	0.994
Elk1	Mapk1	10090.ENSMUSP00000009550	10090.ENSMUSP00000065983	0	0	0	0	0	0.902	0.966	0.06	0.996
Elk3	Junb	10090.ENSMUSP00000008542	10090.ENSMUSP00000064680	0	0	0	0	0.062	0.2	0.261	0.054	0.405
Elk3	Jun	10090.ENSMUSP00000008542	10090.ENSMUSP00000102711	0	0	0	0	0.058	0.2	0.261	0.091	0.426
Elk3	Mapk1	10090.ENSMUSP00000008542	10090.ENSMUSP00000065983	0	0	0	0	0	0.135	0.206	0.286	0.466
Elk3	Mapk3	10090.ENSMUSP00000008542	10090.ENSMUSP00000051619	0	0	0	0	0	0.135	0.206	0.286	0.466
Ets1	Spi1	10090.ENSMUSP00000034534	10090.ENSMUSP00000002180	0	0	0	0.59	0.061	0.13	0	0.843	0.44
Ets1	Braf	10090.ENSMUSP00000034534	10090.ENSMUSP00000002487	0	0	0	0	0	0.263	0.108	0.193	0.423
Ets1	Mapk14	10090.ENSMUSP00000034534	10090.ENSMUSP00000004990	0	0	0	0	0	0.215	0.629	0.363	0.798
Ets1	Fos	10090.ENSMUSP00000034534	10090.ENSMUSP00000021674	0	0	0	0	0.061	0.088	0.629	0.613	0.86
Ets1	Ets2	10090.ENSMUSP00000034534	10090.ENSMUSP00000023612	0	0	0	0.936	0	0.13	0.961	0.879	0.966
Ets1	Tet2	10090.ENSMUSP00000034534	10090.ENSMUSP00000096203	0	0	0	0	0	0	0	0.405	0.405
Ets1	Junb	10090.ENSMUSP00000034534	10090.ENSMUSP00000064680	0	0	0	0	0.07	0.2	0.261	0.225	0.517
Ets1	Jun	10090.ENSMUSP00000034534	10090.ENSMUSP00000102711	0	0	0	0	0.061	0.456	0.629	0.69	0.933
Ets1	Mapk3	10090.ENSMUSP00000034534	10090.ENSMUSP00000051619	0	0	0	0	0	0.311	0.966	0.616	0.99
Ets1	Mapk1	10090.ENSMUSP00000034534	10090.ENSMUSP00000065983	0	0	0	0	0	0.402	0.966	0.805	0.995
Ets2	Braf	10090.ENSMUSP00000023612	10090.ENSMUSP00000002487	0	0	0	0	0	0.263	0.108	0.177	0.412
Ets2	Mapk14	10090.ENSMUSP00000023612	10090.ENSMUSP00000004990	0	0	0	0	0.062	0.215	0.629	0.213	0.756
Ets2	Fos	10090.ENSMUSP00000023612	10090.ENSMUSP00000021674	0	0	0	0	0.063	0.13	0.629	0.566	0.851
Ets2	Junb	10090.ENSMUSP00000023612	10090.ENSMUSP00000064680	0	0	0	0	0.091	0.2	0.261	0.309	0.579
Ets2	Jun	10090.ENSMUSP00000023612	10090.ENSMUSP00000102711	0	0	0	0	0.061	0.456	0.629	0.522	0.897
Ets2	Ets1	10090.ENSMUSP00000023612	10090.ENSMUSP00000034534	0	0	0	0.936	0	0.13	0.961	0.879	0.966
Ets2	Mapk1	10090.ENSMUSP00000023612	10090.ENSMUSP00000065983	0	0	0	0	0	0.311	0.94	0.318	0.969
Ets2	Mapk3	10090.ENSMUSP00000023612	10090.ENSMUSP00000051619	0	0	0	0	0	0.311	0.94	0.39	0.972
Etv1	Mapk14	10090.ENSMUSP00000093442	10090.ENSMUSP00000004990	0	0	0	0	0	0.133	0.676	0.098	0.724
Etv1	Dusp6	10090.ENSMUSP00000093442	10090.ENSMUSP00000020118	0	0	0	0	0	0.044	0	0.402	0.403
Etv1	Fos	10090.ENSMUSP00000093442	10090.ENSMUSP00000021674	0	0	0	0	0	0.047	0.208	0.273	0.403
Etv1	Spry2	10090.ENSMUSP00000093442	10090.ENSMUSP00000022709	0	0	0	0	0.062	0	0	0.418	0.431
Etv1	Spry4	10090.ENSMUSP00000093442	10090.ENSMUSP00000025295	0	0	0	0	0.064	0	0	0.39	0.405
Etv1	Mapk3	10090.ENSMUSP00000093442	10090.ENSMUSP00000051619	0	0	0	0	0	0.133	0.354	0.185	0.504
Etv1	Junb	10090.ENSMUSP00000093442	10090.ENSMUSP00000064680	0	0	0	0	0	0.2	0.261	0.089	0.414
Etv1	Mapk1	10090.ENSMUSP00000093442	10090.ENSMUSP00000065983	0	0	0	0	0	0.133	0.354	0.154	0.485
Etv1	Jun	10090.ENSMUSP00000093442	10090.ENSMUSP00000102711	0	0	0	0	0	0.2	0.261	0.351	0.583
Etv2	Tet3	10090.ENSMUSP00000103782	10090.ENSMUSP00000087049	0	0	0	0	0	0	0	0.425	0.425
Etv2	Jun	10090.ENSMUSP00000103782	10090.ENSMUSP00000102711	0	0	0	0	0	0.2	0.261	0.154	0.456
Etv4	Fgf5	10090.ENSMUSP00000017868	10090.ENSMUSP00000031280	0	0	0	0	0	0.047	0	0.403	0.406
Etv4	Junb	10090.ENSMUSP00000017868	10090.ENSMUSP00000064680	0	0	0	0	0	0.2	0.261	0.083	0.41
Etv4	Fos	10090.ENSMUSP00000017868	10090.ENSMUSP00000021674	0	0	0	0	0	0.047	0.208	0.285	0.413
Etv4	Dusp4	10090.ENSMUSP00000017868	10090.ENSMUSP00000033930	0	0	0	0	0.094	0.044	0	0.4	0.435
Etv4	Mapk3	10090.ENSMUSP00000017868	10090.ENSMUSP00000051619	0	0	0	0	0	0.133	0.206	0.308	0.482
Etv4	Fgf4	10090.ENSMUSP00000017868	10090.ENSMUSP00000056752	0	0	0	0	0.088	0.047	0	0.485	0.513
Etv4	Spry2	10090.ENSMUSP00000017868	10090.ENSMUSP00000022709	0	0	0	0	0.061	0	0	0.637	0.645
Etv4	Jun	10090.ENSMUSP00000017868	10090.ENSMUSP00000102711	0	0	0	0	0	0.2	0.261	0.48	0.665
Etv4	Dusp6	10090.ENSMUSP00000017868	10090.ENSMUSP00000020118	0	0	0	0	0.062	0.044	0	0.671	0.679
Etv4	Spry4	10090.ENSMUSP00000017868	10090.ENSMUSP00000025295	0	0	0	0	0.113	0	0	0.721	0.742
Fgf4	Etv4	10090.ENSMUSP00000056752	10090.ENSMUSP00000017868	0	0	0	0	0.088	0.047	0	0.485	0.513
Fgf4	Spry2	10090.ENSMUSP00000056752	10090.ENSMUSP00000022709	0	0	0	0	0.058	0	0	0.502	0.511
Fgf4	Mapk3	10090.ENSMUSP00000056752	10090.ENSMUSP00000051619	0	0	0	0	0	0.056	0.914	0.435	0.95
Fgf4	Dnmt3b	10090.ENSMUSP00000056752	10090.ENSMUSP00000105396	0	0	0	0	0.151	0	0	0.391	0.461
Fgf4	Mapk1	10090.ENSMUSP00000056752	10090.ENSMUSP00000065983	0	0	0	0	0	0.056	0.914	0.229	0.932
Fgf5	Etv4	10090.ENSMUSP00000031280	10090.ENSMUSP00000017868	0	0	0	0	0	0.047	0	0.403	0.406
Fgf5	Dnmt3b	10090.ENSMUSP00000031280	10090.ENSMUSP00000105396	0	0	0	0	0	0	0	0.476	0.476
Fgf5	Mapk1	10090.ENSMUSP00000031280	10090.ENSMUSP00000065983	0	0	0	0	0	0.162	0.914	0.164	0.934
Fgf5	Mapk3	10090.ENSMUSP00000031280	10090.ENSMUSP00000051619	0	0	0	0	0	0.144	0.914	0.335	0.946
Fos	Spi1	10090.ENSMUSP00000021674	10090.ENSMUSP00000002180	0	0	0	0	0.062	0.13	0	0.615	0.658
Fos	Mapk14	10090.ENSMUSP00000021674	10090.ENSMUSP00000004990	0	0	0	0	0	0.267	0.922	0.716	0.982
Fos	Elk1	10090.ENSMUSP00000021674	10090.ENSMUSP00000009550	0	0	0	0	0	0.087	0.676	0.372	0.798
Fos	Etv4	10090.ENSMUSP00000021674	10090.ENSMUSP00000017868	0	0	0	0	0	0.047	0.208	0.285	0.413
Fos	Dusp6	10090.ENSMUSP00000021674	10090.ENSMUSP00000020118	0	0	0	0	0.132	0.09	0	0.47	0.545
Fos	Etv1	10090.ENSMUSP00000021674	10090.ENSMUSP00000093442	0	0	0	0	0	0.047	0.208	0.273	0.403
Fos	Dusp4	10090.ENSMUSP00000021674	10090.ENSMUSP00000033930	0	0	0	0	0.063	0.091	0	0.375	0.421
Fos	Ets2	10090.ENSMUSP00000021674	10090.ENSMUSP00000023612	0	0	0	0	0.063	0.13	0.629	0.566	0.851
Fos	Ets1	10090.ENSMUSP00000021674	10090.ENSMUSP00000034534	0	0	0	0	0.061	0.088	0.629	0.613	0.86
Fos	Mapk1	10090.ENSMUSP00000021674	10090.ENSMUSP00000065983	0	0	0	0	0	0.267	0.966	0.722	0.992
Fos	Mapk3	10090.ENSMUSP00000021674	10090.ENSMUSP00000051619	0	0	0	0	0	0.267	0.966	0.746	0.993
Fos	Jun	10090.ENSMUSP00000021674	10090.ENSMUSP00000102711	0	0	0	0	0.662	0.982	0.932	0.995	0.999
Fos	Junb	10090.ENSMUSP00000021674	10090.ENSMUSP00000064680	0	0	0	0	0.822	0.804	0.932	0.886	0.999
Il17rd	Braf	10090.ENSMUSP00000036076	10090.ENSMUSP00000002487	0	0	0	0	0	0.054	0.65	0.074	0.666
Il17rd	Dusp6	10090.ENSMUSP00000036076	10090.ENSMUSP00000020118	0	0	0	0	0	0	0	0.5	0.499
Il17rd	Spry4	10090.ENSMUSP00000036076	10090.ENSMUSP00000025295	0	0	0	0	0.075	0	0	0.613	0.627
Il17rd	Mapk1	10090.ENSMUSP00000036076	10090.ENSMUSP00000065983	0	0	0	0	0	0	0.6	0.06	0.607
Il17rd	Mapk3	10090.ENSMUSP00000036076	10090.ENSMUSP00000051619	0	0	0	0	0	0	0.6	0.148	0.644
Jun	Spi1	10090.ENSMUSP00000102711	10090.ENSMUSP00000002180	0	0	0	0	0	0.46	0	0.981	0.989
Jun	Braf	10090.ENSMUSP00000102711	10090.ENSMUSP00000002487	0	0	0	0	0	0.137	0.127	0.433	0.535
Jun	Mapk14	10090.ENSMUSP00000102711	10090.ENSMUSP00000004990	0	0	0	0	0.049	0.4	0.932	0.903	0.995
Jun	Elk3	10090.ENSMUSP00000102711	10090.ENSMUSP00000008542	0	0	0	0	0.058	0.2	0.261	0.091	0.426
Jun	Elk1	10090.ENSMUSP00000102711	10090.ENSMUSP00000009550	0	0	0	0	0	0.2	0.676	0.168	0.765
Jun	Etv4	10090.ENSMUSP00000102711	10090.ENSMUSP00000017868	0	0	0	0	0	0.2	0.261	0.48	0.665
Jun	Dusp6	10090.ENSMUSP00000102711	10090.ENSMUSP00000020118	0	0	0	0	0.106	0.099	0	0.471	0.537
Jun	Fos	10090.ENSMUSP00000102711	10090.ENSMUSP00000021674	0	0	0	0	0.662	0.982	0.932	0.995	0.999
Jun	Ets2	10090.ENSMUSP00000102711	10090.ENSMUSP00000023612	0	0	0	0	0.061	0.456	0.629	0.522	0.897
Jun	Dusp4	10090.ENSMUSP00000102711	10090.ENSMUSP00000033930	0	0	0	0	0.052	0.14	0	0.415	0.481
Jun	Ets1	10090.ENSMUSP00000102711	10090.ENSMUSP00000034534	0	0	0	0	0.061	0.456	0.629	0.69	0.933
Jun	Mapk3	10090.ENSMUSP00000102711	10090.ENSMUSP00000051619	0	0	0	0	0	0.686	0.932	0.863	0.996
Jun	Junb	10090.ENSMUSP00000102711	10090.ENSMUSP00000064680	0	0	0	0.9	0.281	0.367	0.932	0.953	0.969
Jun	Mapk1	10090.ENSMUSP00000102711	10090.ENSMUSP00000065983	0	0	0	0	0	0.686	0.932	0.616	0.991
Jun	Etv1	10090.ENSMUSP00000102711	10090.ENSMUSP00000093442	0	0	0	0	0	0.2	0.261	0.351	0.583
Jun	Etv2	10090.ENSMUSP00000102711	10090.ENSMUSP00000103782	0	0	0	0	0	0.2	0.261	0.154	0.456
Junb	Mapk14	10090.ENSMUSP00000064680	10090.ENSMUSP00000004990	0	0	0	0	0.051	0.261	0.693	0.356	0.842
Junb	Elk3	10090.ENSMUSP00000064680	10090.ENSMUSP00000008542	0	0	0	0	0.062	0.2	0.261	0.054	0.405
Junb	Elk1	10090.ENSMUSP00000064680	10090.ENSMUSP00000009550	0	0	0	0	0	0.2	0.261	0.16	0.46
Junb	Etv4	10090.ENSMUSP00000064680	10090.ENSMUSP00000017868	0	0	0	0	0	0.2	0.261	0.083	0.41
Junb	Fos	10090.ENSMUSP00000064680	10090.ENSMUSP00000021674	0	0	0	0	0.822	0.804	0.932	0.886	0.999
Junb	Ets2	10090.ENSMUSP00000064680	10090.ENSMUSP00000023612	0	0	0	0	0.091	0.2	0.261	0.309	0.579
Junb	Ets1	10090.ENSMUSP00000064680	10090.ENSMUSP00000034534	0	0	0	0	0.07	0.2	0.261	0.225	0.517
Junb	Elf1	10090.ENSMUSP00000064680	10090.ENSMUSP00000046515	0	0	0	0	0.068	0.132	0	0.374	0.449
Junb	Mapk3	10090.ENSMUSP00000064680	10090.ENSMUSP00000051619	0	0	0	0	0	0.261	0.264	0.297	0.584
Junb	Etv1	10090.ENSMUSP00000064680	10090.ENSMUSP00000093442	0	0	0	0	0	0.2	0.261	0.089	0.414
Junb	Mapk1	10090.ENSMUSP00000064680	10090.ENSMUSP00000065983	0	0	0	0	0	0.261	0.264	0.179	0.515
Junb	Jun	10090.ENSMUSP00000064680	10090.ENSMUSP00000102711	0	0	0	0.9	0.281	0.367	0.932	0.953	0.969
Map3k2	Mapk14	10090.ENSMUSP00000094326	10090.ENSMUSP00000004990	0	0	0	0.63	0.061	0.329	0.42	0.476	0.669
Map3k2	Mapk3	10090.ENSMUSP00000094326	10090.ENSMUSP00000051619	0	0	0	0.625	0.061	0.329	0.247	0.45	0.566
Map3k2	Mapk1	10090.ENSMUSP00000094326	10090.ENSMUSP00000065983	0	0	0	0.636	0.061	0.329	0.247	0.358	0.546
Mapk1	Braf	10090.ENSMUSP00000065983	10090.ENSMUSP00000002487	0	0	0	0.585	0.067	0.522	0.864	0.604	0.95
Mapk1	Mapk14	10090.ENSMUSP00000065983	10090.ENSMUSP00000004990	0	0	0.401	0.926	0.062	0.763	0.8	0.721	0.955
Mapk1	Elk3	10090.ENSMUSP00000065983	10090.ENSMUSP00000008542	0	0	0	0	0	0.135	0.206	0.286	0.466
Mapk1	Elk1	10090.ENSMUSP00000065983	10090.ENSMUSP00000009550	0	0	0	0	0	0.902	0.966	0.06	0.996
Mapk1	Dusp6	10090.ENSMUSP00000065983	10090.ENSMUSP00000020118	0	0	0	0	0.052	0.932	0.966	0.871	0.999
Mapk1	Fos	10090.ENSMUSP00000065983	10090.ENSMUSP00000021674	0	0	0	0	0	0.267	0.966	0.722	0.992
Mapk1	Spry2	10090.ENSMUSP00000065983	10090.ENSMUSP00000022709	0	0	0	0	0	0	0.9	0.298	0.926
Mapk1	Ets2	10090.ENSMUSP00000065983	10090.ENSMUSP00000023612	0	0	0	0	0	0.311	0.94	0.318	0.969
Mapk1	Fgf5	10090.ENSMUSP00000065983	10090.ENSMUSP00000031280	0	0	0	0	0	0.162	0.914	0.164	0.934
Mapk1	Dusp4	10090.ENSMUSP00000065983	10090.ENSMUSP00000033930	0	0	0	0	0.052	0.402	0.947	0.288	0.976
Mapk1	Ets1	10090.ENSMUSP00000065983	10090.ENSMUSP00000034534	0	0	0	0	0	0.402	0.966	0.805	0.995
Mapk1	Il17rd	10090.ENSMUSP00000065983	10090.ENSMUSP00000036076	0	0	0	0	0	0	0.6	0.06	0.607
Mapk1	Mapk3	10090.ENSMUSP00000065983	10090.ENSMUSP00000051619	0	0	0.446	0.983	0	0.847	0.932	0.897	0.989
Mapk1	Fgf4	10090.ENSMUSP00000065983	10090.ENSMUSP00000056752	0	0	0	0	0	0.056	0.914	0.229	0.932
Mapk1	Junb	10090.ENSMUSP00000065983	10090.ENSMUSP00000064680	0	0	0	0	0	0.261	0.264	0.179	0.515
Mapk1	Etv1	10090.ENSMUSP00000065983	10090.ENSMUSP00000093442	0	0	0	0	0	0.133	0.354	0.154	0.485
Mapk1	Map3k2	10090.ENSMUSP00000065983	10090.ENSMUSP00000094326	0	0	0	0.636	0.061	0.329	0.247	0.358	0.546
Mapk1	Jun	10090.ENSMUSP00000065983	10090.ENSMUSP00000102711	0	0	0	0	0	0.686	0.932	0.616	0.991
Mapk14	Spi1	10090.ENSMUSP00000004990	10090.ENSMUSP00000002180	0	0	0	0	0.061	0.054	0	0.439	0.458
Mapk14	Braf	10090.ENSMUSP00000004990	10090.ENSMUSP00000002487	0	0	0	0.608	0.064	0.272	0.305	0.495	0.58
Mapk14	Map3k2	10090.ENSMUSP00000004990	10090.ENSMUSP00000094326	0	0	0	0.63	0.061	0.329	0.42	0.476	0.669
Mapk14	Etv1	10090.ENSMUSP00000004990	10090.ENSMUSP00000093442	0	0	0	0	0	0.133	0.676	0.098	0.724
Mapk14	Ets2	10090.ENSMUSP00000004990	10090.ENSMUSP00000023612	0	0	0	0	0.062	0.215	0.629	0.213	0.756
Mapk14	Ets1	10090.ENSMUSP00000004990	10090.ENSMUSP00000034534	0	0	0	0	0	0.215	0.629	0.363	0.798
Mapk14	Junb	10090.ENSMUSP00000004990	10090.ENSMUSP00000064680	0	0	0	0	0.051	0.261	0.693	0.356	0.842
Mapk14	Dusp6	10090.ENSMUSP00000004990	10090.ENSMUSP00000020118	0	0	0	0	0	0.241	0.629	0.546	0.861
Mapk14	Mapk3	10090.ENSMUSP00000004990	10090.ENSMUSP00000051619	0	0	0.383	0.923	0.061	0.598	0.8	0.912	0.925
Mapk14	Elk1	10090.ENSMUSP00000004990	10090.ENSMUSP00000009550	0	0	0	0	0.061	0.133	0.922	0.049	0.932
Mapk14	Dusp4	10090.ENSMUSP00000004990	10090.ENSMUSP00000033930	0	0	0	0	0	0.378	0.845	0.446	0.942
Mapk14	Mapk1	10090.ENSMUSP00000004990	10090.ENSMUSP00000065983	0	0	0.401	0.926	0.062	0.763	0.8	0.721	0.955
Mapk14	Fos	10090.ENSMUSP00000004990	10090.ENSMUSP00000021674	0	0	0	0	0	0.267	0.922	0.716	0.982
Mapk14	Jun	10090.ENSMUSP00000004990	10090.ENSMUSP00000102711	0	0	0	0	0.049	0.4	0.932	0.903	0.995
Mapk3	Braf	10090.ENSMUSP00000051619	10090.ENSMUSP00000002487	0	0	0	0.582	0.067	0.522	0.864	0.741	0.954
Mapk3	Mapk14	10090.ENSMUSP00000051619	10090.ENSMUSP00000004990	0	0	0.383	0.923	0.061	0.598	0.8	0.912	0.925
Mapk3	Elk3	10090.ENSMUSP00000051619	10090.ENSMUSP00000008542	0	0	0	0	0	0.135	0.206	0.286	0.466
Mapk3	Elk1	10090.ENSMUSP00000051619	10090.ENSMUSP00000009550	0	0	0	0	0	0.809	0.966	0.176	0.994
Mapk3	Etv4	10090.ENSMUSP00000051619	10090.ENSMUSP00000017868	0	0	0	0	0	0.133	0.206	0.308	0.482
Mapk3	Dusp6	10090.ENSMUSP00000051619	10090.ENSMUSP00000020118	0	0	0	0	0.052	0.634	0.966	0.728	0.996
Mapk3	Fos	10090.ENSMUSP00000051619	10090.ENSMUSP00000021674	0	0	0	0	0	0.267	0.966	0.746	0.993
Mapk3	Spry2	10090.ENSMUSP00000051619	10090.ENSMUSP00000022709	0	0	0	0	0	0	0.9	0.558	0.953
Mapk3	Ets2	10090.ENSMUSP00000051619	10090.ENSMUSP00000023612	0	0	0	0	0	0.311	0.94	0.39	0.972
Mapk3	Fgf5	10090.ENSMUSP00000051619	10090.ENSMUSP00000031280	0	0	0	0	0	0.144	0.914	0.335	0.946
Mapk3	Dusp4	10090.ENSMUSP00000051619	10090.ENSMUSP00000033930	0	0	0	0	0.052	0.402	0.961	0.598	0.99
Mapk3	Ets1	10090.ENSMUSP00000051619	10090.ENSMUSP00000034534	0	0	0	0	0	0.311	0.966	0.616	0.99
Mapk3	Il17rd	10090.ENSMUSP00000051619	10090.ENSMUSP00000036076	0	0	0	0	0	0	0.6	0.148	0.644
Mapk3	Tet1	10090.ENSMUSP00000051619	10090.ENSMUSP00000133279	0	0	0	0	0	0	0	0.424	0.424
Mapk3	Etv1	10090.ENSMUSP00000051619	10090.ENSMUSP00000093442	0	0	0	0	0	0.133	0.354	0.185	0.504
Mapk3	Map3k2	10090.ENSMUSP00000051619	10090.ENSMUSP00000094326	0	0	0	0.625	0.061	0.329	0.247	0.45	0.566
Mapk3	Junb	10090.ENSMUSP00000051619	10090.ENSMUSP00000064680	0	0	0	0	0	0.261	0.264	0.297	0.584
Mapk3	Fgf4	10090.ENSMUSP00000051619	10090.ENSMUSP00000056752	0	0	0	0	0	0.056	0.914	0.435	0.95
Mapk3	Mapk1	10090.ENSMUSP00000051619	10090.ENSMUSP00000065983	0	0	0.446	0.983	0	0.847	0.932	0.897	0.989
Mapk3	Jun	10090.ENSMUSP00000051619	10090.ENSMUSP00000102711	0	0	0	0	0	0.686	0.932	0.863	0.996
Spi1	Ets1	10090.ENSMUSP00000002180	10090.ENSMUSP00000034534	0	0	0	0.59	0.061	0.13	0	0.843	0.44
Spi1	Mapk14	10090.ENSMUSP00000002180	10090.ENSMUSP00000004990	0	0	0	0	0.061	0.054	0	0.439	0.458
Spi1	Dnmt3b	10090.ENSMUSP00000002180	10090.ENSMUSP00000105396	0	0	0	0	0	0.13	0	0.53	0.575
Spi1	Fos	10090.ENSMUSP00000002180	10090.ENSMUSP00000021674	0	0	0	0	0.062	0.13	0	0.615	0.658
Spi1	Dnmt3a	10090.ENSMUSP00000002180	10090.ENSMUSP00000020991	0	0	0	0	0	0.13	0	0.853	0.867
Spi1	Tet2	10090.ENSMUSP00000002180	10090.ENSMUSP00000096203	0	0	0	0	0	0	0	0.947	0.947
Spi1	Jun	10090.ENSMUSP00000002180	10090.ENSMUSP00000102711	0	0	0	0	0	0.46	0	0.981	0.989
Spry2	Braf	10090.ENSMUSP00000022709	10090.ENSMUSP00000002487	0	0	0	0	0	0.178	0.818	0.351	0.894
Spry2	Etv4	10090.ENSMUSP00000022709	10090.ENSMUSP00000017868	0	0	0	0	0.061	0	0	0.637	0.645
Spry2	Dusp6	10090.ENSMUSP00000022709	10090.ENSMUSP00000020118	0	0	0	0	0.081	0.042	0	0.741	0.752
Spry2	Etv1	10090.ENSMUSP00000022709	10090.ENSMUSP00000093442	0	0	0	0	0.062	0	0	0.418	0.431
Spry2	Fgf4	10090.ENSMUSP00000022709	10090.ENSMUSP00000056752	0	0	0	0	0.058	0	0	0.502	0.511
Spry2	Dusp4	10090.ENSMUSP00000022709	10090.ENSMUSP00000033930	0	0	0	0	0.061	0.042	0	0.53	0.541
Spry2	Spry4	10090.ENSMUSP00000022709	10090.ENSMUSP00000025295	0	0	0	0.894	0.064	0.439	0.629	0.841	0.807
Spry2	Mapk1	10090.ENSMUSP00000022709	10090.ENSMUSP00000065983	0	0	0	0	0	0	0.9	0.298	0.926
Spry2	Mapk3	10090.ENSMUSP00000022709	10090.ENSMUSP00000051619	0	0	0	0	0	0	0.9	0.558	0.953
Spry4	Etv4	10090.ENSMUSP00000025295	10090.ENSMUSP00000017868	0	0	0	0	0.113	0	0	0.721	0.742
Spry4	Dusp6	10090.ENSMUSP00000025295	10090.ENSMUSP00000020118	0	0	0	0	0.08	0.042	0	0.741	0.752
Spry4	Spry2	10090.ENSMUSP00000025295	10090.ENSMUSP00000022709	0	0	0	0.894	0.064	0.439	0.629	0.841	0.807
Spry4	Etv1	10090.ENSMUSP00000025295	10090.ENSMUSP00000093442	0	0	0	0	0.064	0	0	0.39	0.405
Spry4	Il17rd	10090.ENSMUSP00000025295	10090.ENSMUSP00000036076	0	0	0	0	0.075	0	0	0.613	0.627
Spry4	Dusp4	10090.ENSMUSP00000025295	10090.ENSMUSP00000033930	0	0	0	0	0.062	0.042	0	0.658	0.666
Tet1	Dnmt3a	10090.ENSMUSP00000133279	10090.ENSMUSP00000020991	0	0	0	0	0.061	0.07	0	0.845	0.853
Tet1	Mapk3	10090.ENSMUSP00000133279	10090.ENSMUSP00000051619	0	0	0	0	0	0	0	0.424	0.424
Tet1	Tet3	10090.ENSMUSP00000133279	10090.ENSMUSP00000087049	0	0	0	0.683	0	0	0.6	0.955	0.72
Tet1	Tet2	10090.ENSMUSP00000133279	10090.ENSMUSP00000096203	0	0	0	0.635	0.076	0	0.6	0.955	0.748
Tet1	Dnmt3b	10090.ENSMUSP00000133279	10090.ENSMUSP00000105396	0	0	0	0	0.097	0.07	0	0.83	0.845
Tet2	Spi1	10090.ENSMUSP00000096203	10090.ENSMUSP00000002180	0	0	0	0	0	0	0	0.947	0.947
Tet2	Dnmt3a	10090.ENSMUSP00000096203	10090.ENSMUSP00000020991	0	0	0	0	0.062	0.13	0	0.867	0.882
Tet2	Ets1	10090.ENSMUSP00000096203	10090.ENSMUSP00000034534	0	0	0	0	0	0	0	0.405	0.405
Tet2	Tet3	10090.ENSMUSP00000096203	10090.ENSMUSP00000087049	0	0	0	0.714	0.064	0.686	0.6	0.957	0.907
Tet2	Tet1	10090.ENSMUSP00000096203	10090.ENSMUSP00000133279	0	0	0	0.635	0.076	0	0.6	0.955	0.748
Tet2	Dnmt3b	10090.ENSMUSP00000096203	10090.ENSMUSP00000105396	0	0	0	0	0.061	0.07	0	0.861	0.868
Tet3	Dnmt3a	10090.ENSMUSP00000087049	10090.ENSMUSP00000020991	0	0	0	0	0.061	0.07	0	0.8	0.81
Tet3	Etv2	10090.ENSMUSP00000087049	10090.ENSMUSP00000103782	0	0	0	0	0	0	0	0.425	0.425
Tet3	Tet1	10090.ENSMUSP00000087049	10090.ENSMUSP00000133279	0	0	0	0.683	0	0	0.6	0.955	0.72
Tet3	Dnmt3b	10090.ENSMUSP00000087049	10090.ENSMUSP00000105396	0	0	0	0	0.061	0.07	0	0.774	0.785
Tet3	Tet2	10090.ENSMUSP00000087049	10090.ENSMUSP00000096203	0	0	0	0.714	0.064	0.686	0.6	0.957	0.907

## Sheet: string_functional_annotations
#node	identifier	category	term ID	term description
Braf	10090.ENSMUSP00000002487	GO Process	GO:0000165	MAPK cascade
Braf	10090.ENSMUSP00000002487	GO Process	GO:0000186	Activation of mapkk activity
Braf	10090.ENSMUSP00000002487	GO Process	GO:0001505	Regulation of neurotransmitter levels
Braf	10090.ENSMUSP00000002487	GO Process	GO:0001775	Cell activation
Braf	10090.ENSMUSP00000002487	GO Process	GO:0001932	Regulation of protein phosphorylation
Braf	10090.ENSMUSP00000002487	GO Process	GO:0001934	Positive regulation of protein phosphorylation
Braf	10090.ENSMUSP00000002487	GO Process	GO:0002244	Hematopoietic progenitor cell differentiation
Braf	10090.ENSMUSP00000002487	GO Process	GO:0002253	Activation of immune response
Braf	10090.ENSMUSP00000002487	GO Process	GO:0002318	Myeloid progenitor cell differentiation
Braf	10090.ENSMUSP00000002487	GO Process	GO:0002360	T cell lineage commitment
Braf	10090.ENSMUSP00000002487	GO Process	GO:0002376	Immune system process
Braf	10090.ENSMUSP00000002487	GO Process	GO:0002429	Immune response-activating cell surface receptor signaling pathway
Braf	10090.ENSMUSP00000002487	GO Process	GO:0002520	Immune system development
Braf	10090.ENSMUSP00000002487	GO Process	GO:0002521	Leukocyte differentiation
Braf	10090.ENSMUSP00000002487	GO Process	GO:0002682	Regulation of immune system process
Braf	10090.ENSMUSP00000002487	GO Process	GO:0002684	Positive regulation of immune system process
Braf	10090.ENSMUSP00000002487	GO Process	GO:0002694	Regulation of leukocyte activation
Braf	10090.ENSMUSP00000002487	GO Process	GO:0002757	Immune response-activating signal transduction
Braf	10090.ENSMUSP00000002487	GO Process	GO:0002764	Immune response-regulating signaling pathway
Braf	10090.ENSMUSP00000002487	GO Process	GO:0002768	Immune response-regulating cell surface receptor signaling pathway
Braf	10090.ENSMUSP00000002487	GO Process	GO:0003008	System process
Braf	10090.ENSMUSP00000002487	GO Process	GO:0005975	Carbohydrate metabolic process
Braf	10090.ENSMUSP00000002487	GO Process	GO:0005984	Disaccharide metabolic process
Braf	10090.ENSMUSP00000002487	GO Process	GO:0005991	Trehalose metabolic process
Braf	10090.ENSMUSP00000002487	GO Process	GO:0006464	Cellular protein modification process
Braf	10090.ENSMUSP00000002487	GO Process	GO:0006468	Protein phosphorylation
Braf	10090.ENSMUSP00000002487	GO Process	GO:0006793	Phosphorus metabolic process
Braf	10090.ENSMUSP00000002487	GO Process	GO:0006796	Phosphate-containing compound metabolic process
Braf	10090.ENSMUSP00000002487	GO Process	GO:0006807	Nitrogen compound metabolic process
Braf	10090.ENSMUSP00000002487	GO Process	GO:0006950	Response to stress
Braf	10090.ENSMUSP00000002487	GO Process	GO:0007154	Cell communication
Braf	10090.ENSMUSP00000002487	GO Process	GO:0007165	Signal transduction
Braf	10090.ENSMUSP00000002487	GO Process	GO:0007166	Cell surface receptor signaling pathway
Braf	10090.ENSMUSP00000002487	GO Process	GO:0007167	Enzyme linked receptor protein signaling pathway
Braf	10090.ENSMUSP00000002487	GO Process	GO:0007169	Transmembrane receptor protein tyrosine kinase signaling pathway
Braf	10090.ENSMUSP00000002487	GO Process	GO:0007173	Epidermal growth factor receptor signaling pathway
Braf	10090.ENSMUSP00000002487	GO Process	GO:0007275	Multicellular organism development
Braf	10090.ENSMUSP00000002487	GO Process	GO:0007399	Nervous system development
Braf	10090.ENSMUSP00000002487	GO Process	GO:0007610	Behavior
Braf	10090.ENSMUSP00000002487	GO Process	GO:0007611	Learning or memory
Braf	10090.ENSMUSP00000002487	GO Process	GO:0007612	Learning
Braf	10090.ENSMUSP00000002487	GO Process	GO:0007632	Visual behavior
Braf	10090.ENSMUSP00000002487	GO Process	GO:0008104	Protein localization
Braf	10090.ENSMUSP00000002487	GO Process	GO:0008152	Metabolic process
Braf	10090.ENSMUSP00000002487	GO Process	GO:0008306	Associative learning
Braf	10090.ENSMUSP00000002487	GO Process	GO:0008542	Visual learning
Braf	10090.ENSMUSP00000002487	GO Process	GO:0009311	Oligosaccharide metabolic process
Braf	10090.ENSMUSP00000002487	GO Process	GO:0009314	Response to radiation
Braf	10090.ENSMUSP00000002487	GO Process	GO:0009416	Response to light stimulus
Braf	10090.ENSMUSP00000002487	GO Process	GO:0009628	Response to abiotic stimulus
Braf	10090.ENSMUSP00000002487	GO Process	GO:0009653	Anatomical structure morphogenesis
Braf	10090.ENSMUSP00000002487	GO Process	GO:0009719	Response to endogenous stimulus
Braf	10090.ENSMUSP00000002487	GO Process	GO:0009725	Response to hormone
Braf	10090.ENSMUSP00000002487	GO Process	GO:0009893	Positive regulation of metabolic process
Braf	10090.ENSMUSP00000002487	GO Process	GO:0009966	Regulation of signal transduction
Braf	10090.ENSMUSP00000002487	GO Process	GO:0009967	Positive regulation of signal transduction
Braf	10090.ENSMUSP00000002487	GO Process	GO:0009987	Cellular process
Braf	10090.ENSMUSP00000002487	GO Process	GO:0010033	Response to organic substance
Braf	10090.ENSMUSP00000002487	GO Process	GO:0010035	Response to inorganic substance
Braf	10090.ENSMUSP00000002487	GO Process	GO:0010038	Response to metal ion
Braf	10090.ENSMUSP00000002487	GO Process	GO:0010171	Body morphogenesis
Braf	10090.ENSMUSP00000002487	GO Process	GO:0010243	Response to organonitrogen compound
Braf	10090.ENSMUSP00000002487	GO Process	GO:0010468	Regulation of gene expression
Braf	10090.ENSMUSP00000002487	GO Process	GO:0010562	Positive regulation of phosphorus metabolic process
Braf	10090.ENSMUSP00000002487	GO Process	GO:0010604	Positive regulation of macromolecule metabolic process
Braf	10090.ENSMUSP00000002487	GO Process	GO:0010628	Positive regulation of gene expression
Braf	10090.ENSMUSP00000002487	GO Process	GO:0010638	Positive regulation of organelle organization
Braf	10090.ENSMUSP00000002487	GO Process	GO:0010646	Regulation of cell communication
Braf	10090.ENSMUSP00000002487	GO Process	GO:0010647	Positive regulation of cell communication
Braf	10090.ENSMUSP00000002487	GO Process	GO:0010648	Negative regulation of cell communication
Braf	10090.ENSMUSP00000002487	GO Process	GO:0010720	Positive regulation of cell development
Braf	10090.ENSMUSP00000002487	GO Process	GO:0010762	Regulation of fibroblast migration
Braf	10090.ENSMUSP00000002487	GO Process	GO:0010764	Negative regulation of fibroblast migration
Braf	10090.ENSMUSP00000002487	GO Process	GO:0010769	Regulation of cell morphogenesis involved in differentiation
Braf	10090.ENSMUSP00000002487	GO Process	GO:0010770	Positive regulation of cell morphogenesis involved in differentiation
Braf	10090.ENSMUSP00000002487	GO Process	GO:0010810	Regulation of cell-substrate adhesion
Braf	10090.ENSMUSP00000002487	GO Process	GO:0010811	Positive regulation of cell-substrate adhesion
Braf	10090.ENSMUSP00000002487	GO Process	GO:0010827	Regulation of glucose transmembrane transport
Braf	10090.ENSMUSP00000002487	GO Process	GO:0010828	Positive regulation of glucose transmembrane transport
Braf	10090.ENSMUSP00000002487	GO Process	GO:0010941	Regulation of cell death
Braf	10090.ENSMUSP00000002487	GO Process	GO:0010975	Regulation of neuron projection development
Braf	10090.ENSMUSP00000002487	GO Process	GO:0010976	Positive regulation of neuron projection development
Braf	10090.ENSMUSP00000002487	GO Process	GO:0014070	Response to organic cyclic compound
Braf	10090.ENSMUSP00000002487	GO Process	GO:0014074	Response to purine-containing compound
Braf	10090.ENSMUSP00000002487	GO Process	GO:0016310	Phosphorylation
Braf	10090.ENSMUSP00000002487	GO Process	GO:0017157	Regulation of exocytosis
Braf	10090.ENSMUSP00000002487	GO Process	GO:0019220	Regulation of phosphate metabolic process
Braf	10090.ENSMUSP00000002487	GO Process	GO:0019222	Regulation of metabolic process
Braf	10090.ENSMUSP00000002487	GO Process	GO:0019538	Protein metabolic process
Braf	10090.ENSMUSP00000002487	GO Process	GO:0019827	Stem cell population maintenance
Braf	10090.ENSMUSP00000002487	GO Process	GO:0022008	Neurogenesis
Braf	10090.ENSMUSP00000002487	GO Process	GO:0022603	Regulation of anatomical structure morphogenesis
Braf	10090.ENSMUSP00000002487	GO Process	GO:0022604	Regulation of cell morphogenesis
Braf	10090.ENSMUSP00000002487	GO Process	GO:0023014	Signal transduction by protein phosphorylation
Braf	10090.ENSMUSP00000002487	GO Process	GO:0023051	Regulation of signaling
Braf	10090.ENSMUSP00000002487	GO Process	GO:0023052	Signaling
Braf	10090.ENSMUSP00000002487	GO Process	GO:0023056	Positive regulation of signaling
Braf	10090.ENSMUSP00000002487	GO Process	GO:0023057	Negative regulation of signaling
Braf	10090.ENSMUSP00000002487	GO Process	GO:0030097	Hemopoiesis
Braf	10090.ENSMUSP00000002487	GO Process	GO:0030098	Lymphocyte differentiation
Braf	10090.ENSMUSP00000002487	GO Process	GO:0030154	Cell differentiation
Braf	10090.ENSMUSP00000002487	GO Process	GO:0030155	Regulation of cell adhesion
Braf	10090.ENSMUSP00000002487	GO Process	GO:0030217	T cell differentiation
Braf	10090.ENSMUSP00000002487	GO Process	GO:0030334	Regulation of cell migration
Braf	10090.ENSMUSP00000002487	GO Process	GO:0030336	Negative regulation of cell migration
Braf	10090.ENSMUSP00000002487	GO Process	GO:0030878	Thyroid gland development
Braf	10090.ENSMUSP00000002487	GO Process	GO:0031323	Regulation of cellular metabolic process
Braf	10090.ENSMUSP00000002487	GO Process	GO:0031325	Positive regulation of cellular metabolic process
Braf	10090.ENSMUSP00000002487	GO Process	GO:0031344	Regulation of cell projection organization
Braf	10090.ENSMUSP00000002487	GO Process	GO:0031346	Positive regulation of cell projection organization
Braf	10090.ENSMUSP00000002487	GO Process	GO:0031399	Regulation of protein modification process
Braf	10090.ENSMUSP00000002487	GO Process	GO:0031401	Positive regulation of protein modification process
Braf	10090.ENSMUSP00000002487	GO Process	GO:0032101	Regulation of response to external stimulus
Braf	10090.ENSMUSP00000002487	GO Process	GO:0032103	Positive regulation of response to external stimulus
Braf	10090.ENSMUSP00000002487	GO Process	GO:0032147	Activation of protein kinase activity
Braf	10090.ENSMUSP00000002487	GO Process	GO:0032231	Regulation of actin filament bundle assembly
Braf	10090.ENSMUSP00000002487	GO Process	GO:0032233	Positive regulation of actin filament bundle assembly
Braf	10090.ENSMUSP00000002487	GO Process	GO:0032268	Regulation of cellular protein metabolic process
Braf	10090.ENSMUSP00000002487	GO Process	GO:0032270	Positive regulation of cellular protein metabolic process
Braf	10090.ENSMUSP00000002487	GO Process	GO:0032501	Multicellular organismal process
Braf	10090.ENSMUSP00000002487	GO Process	GO:0032502	Developmental process
Braf	10090.ENSMUSP00000002487	GO Process	GO:0032879	Regulation of localization
Braf	10090.ENSMUSP00000002487	GO Process	GO:0032956	Regulation of actin cytoskeleton organization
Braf	10090.ENSMUSP00000002487	GO Process	GO:0032970	Regulation of actin filament-based process
Braf	10090.ENSMUSP00000002487	GO Process	GO:0033036	Macromolecule localization
Braf	10090.ENSMUSP00000002487	GO Process	GO:0033043	Regulation of organelle organization
Braf	10090.ENSMUSP00000002487	GO Process	GO:0033135	Regulation of peptidyl-serine phosphorylation
Braf	10090.ENSMUSP00000002487	GO Process	GO:0033138	Positive regulation of peptidyl-serine phosphorylation
Braf	10090.ENSMUSP00000002487	GO Process	GO:0033554	Cellular response to stress
Braf	10090.ENSMUSP00000002487	GO Process	GO:0033674	Positive regulation of kinase activity
Braf	10090.ENSMUSP00000002487	GO Process	GO:0034613	Cellular protein localization
Braf	10090.ENSMUSP00000002487	GO Process	GO:0034762	Regulation of transmembrane transport
Braf	10090.ENSMUSP00000002487	GO Process	GO:0034764	Positive regulation of transmembrane transport
Braf	10090.ENSMUSP00000002487	GO Process	GO:0035019	Somatic stem cell population maintenance
Braf	10090.ENSMUSP00000002487	GO Process	GO:0035270	Endocrine system development
Braf	10090.ENSMUSP00000002487	GO Process	GO:0035556	Intracellular signal transduction
Braf	10090.ENSMUSP00000002487	GO Process	GO:0035690	Cellular response to drug
Braf	10090.ENSMUSP00000002487	GO Process	GO:0035710	CD4-positive, alpha-beta T cell activation
Braf	10090.ENSMUSP00000002487	GO Process	GO:0036211	Protein modification process
Braf	10090.ENSMUSP00000002487	GO Process	GO:0038127	ERBB signaling pathway
Braf	10090.ENSMUSP00000002487	GO Process	GO:0040012	Regulation of locomotion
Braf	10090.ENSMUSP00000002487	GO Process	GO:0040013	Negative regulation of locomotion
Braf	10090.ENSMUSP00000002487	GO Process	GO:0042110	T cell activation
Braf	10090.ENSMUSP00000002487	GO Process	GO:0042127	Regulation of cell population proliferation
Braf	10090.ENSMUSP00000002487	GO Process	GO:0042221	Response to chemical
Braf	10090.ENSMUSP00000002487	GO Process	GO:0042325	Regulation of phosphorylation
Braf	10090.ENSMUSP00000002487	GO Process	GO:0042327	Positive regulation of phosphorylation
Braf	10090.ENSMUSP00000002487	GO Process	GO:0042493	Response to drug
Braf	10090.ENSMUSP00000002487	GO Process	GO:0042981	Regulation of apoptotic process
Braf	10090.ENSMUSP00000002487	GO Process	GO:0043066	Negative regulation of apoptotic process
Braf	10090.ENSMUSP00000002487	GO Process	GO:0043067	Regulation of programmed cell death
Braf	10090.ENSMUSP00000002487	GO Process	GO:0043069	Negative regulation of programmed cell death
Braf	10090.ENSMUSP00000002487	GO Process	GO:0043085	Positive regulation of catalytic activity
Braf	10090.ENSMUSP00000002487	GO Process	GO:0043170	Macromolecule metabolic process
Braf	10090.ENSMUSP00000002487	GO Process	GO:0043367	CD4-positive, alpha-beta T cell differentiation
Braf	10090.ENSMUSP00000002487	GO Process	GO:0043368	Positive t cell selection
Braf	10090.ENSMUSP00000002487	GO Process	GO:0043369	CD4-positive or CD8-positive, alpha-beta T cell lineage commitment
Braf	10090.ENSMUSP00000002487	GO Process	GO:0043405	Regulation of map kinase activity
Braf	10090.ENSMUSP00000002487	GO Process	GO:0043406	Positive regulation of map kinase activity
Braf	10090.ENSMUSP00000002487	GO Process	GO:0043408	Regulation of mapk cascade
Braf	10090.ENSMUSP00000002487	GO Process	GO:0043410	Positive regulation of mapk cascade
Braf	10090.ENSMUSP00000002487	GO Process	GO:0043412	Macromolecule modification
Braf	10090.ENSMUSP00000002487	GO Process	GO:0043434	Response to peptide hormone
Braf	10090.ENSMUSP00000002487	GO Process	GO:0043523	Regulation of neuron apoptotic process
Braf	10090.ENSMUSP00000002487	GO Process	GO:0043524	Negative regulation of neuron apoptotic process
Braf	10090.ENSMUSP00000002487	GO Process	GO:0043549	Regulation of kinase activity
Braf	10090.ENSMUSP00000002487	GO Process	GO:0044087	Regulation of cellular component biogenesis
Braf	10090.ENSMUSP00000002487	GO Process	GO:0044089	Positive regulation of cellular component biogenesis
Braf	10090.ENSMUSP00000002487	GO Process	GO:0044093	Positive regulation of molecular function
Braf	10090.ENSMUSP00000002487	GO Process	GO:0044237	Cellular metabolic process
Braf	10090.ENSMUSP00000002487	GO Process	GO:0044238	Primary metabolic process
Braf	10090.ENSMUSP00000002487	GO Process	GO:0044260	Cellular macromolecule metabolic process
Braf	10090.ENSMUSP00000002487	GO Process	GO:0044262	Cellular carbohydrate metabolic process
Braf	10090.ENSMUSP00000002487	GO Process	GO:0044267	Cellular protein metabolic process
Braf	10090.ENSMUSP00000002487	GO Process	GO:0045058	T cell selection
Braf	10090.ENSMUSP00000002487	GO Process	GO:0045165	Cell fate commitment
Braf	10090.ENSMUSP00000002487	GO Process	GO:0045184	Establishment of protein localization
Braf	10090.ENSMUSP00000002487	GO Process	GO:0045321	Leukocyte activation
Braf	10090.ENSMUSP00000002487	GO Process	GO:0045580	Regulation of t cell differentiation
Braf	10090.ENSMUSP00000002487	GO Process	GO:0045595	Regulation of cell differentiation
Braf	10090.ENSMUSP00000002487	GO Process	GO:0045597	Positive regulation of cell differentiation
Braf	10090.ENSMUSP00000002487	GO Process	GO:0045619	Regulation of lymphocyte differentiation
Braf	10090.ENSMUSP00000002487	GO Process	GO:0045664	Regulation of neuron differentiation
Braf	10090.ENSMUSP00000002487	GO Process	GO:0045666	Positive regulation of neuron differentiation
Braf	10090.ENSMUSP00000002487	GO Process	GO:0045785	Positive regulation of cell adhesion
Braf	10090.ENSMUSP00000002487	GO Process	GO:0045859	Regulation of protein kinase activity
Braf	10090.ENSMUSP00000002487	GO Process	GO:0045860	Positive regulation of protein kinase activity
Braf	10090.ENSMUSP00000002487	GO Process	GO:0045920	Negative regulation of exocytosis
Braf	10090.ENSMUSP00000002487	GO Process	GO:0045937	Positive regulation of phosphate metabolic process
Braf	10090.ENSMUSP00000002487	GO Process	GO:0046631	Alpha-beta t cell activation
Braf	10090.ENSMUSP00000002487	GO Process	GO:0046632	Alpha-beta t cell differentiation
Braf	10090.ENSMUSP00000002487	GO Process	GO:0046649	Lymphocyte activation
Braf	10090.ENSMUSP00000002487	GO Process	GO:0046683	Response to organophosphorus
Braf	10090.ENSMUSP00000002487	GO Process	GO:0046928	Regulation of neurotransmitter secretion
Braf	10090.ENSMUSP00000002487	GO Process	GO:0046929	Negative regulation of neurotransmitter secretion
Braf	10090.ENSMUSP00000002487	GO Process	GO:0048167	Regulation of synaptic plasticity
Braf	10090.ENSMUSP00000002487	GO Process	GO:0048513	Animal organ development
Braf	10090.ENSMUSP00000002487	GO Process	GO:0048518	Positive regulation of biological process
Braf	10090.ENSMUSP00000002487	GO Process	GO:0048519	Negative regulation of biological process
Braf	10090.ENSMUSP00000002487	GO Process	GO:0048522	Positive regulation of cellular process
Braf	10090.ENSMUSP00000002487	GO Process	GO:0048523	Negative regulation of cellular process
Braf	10090.ENSMUSP00000002487	GO Process	GO:0048534	Hematopoietic or lymphoid organ development
Braf	10090.ENSMUSP00000002487	GO Process	GO:0048538	Thymus development
Braf	10090.ENSMUSP00000002487	GO Process	GO:0048583	Regulation of response to stimulus
Braf	10090.ENSMUSP00000002487	GO Process	GO:0048584	Positive regulation of response to stimulus
Braf	10090.ENSMUSP00000002487	GO Process	GO:0048679	Regulation of axon regeneration
Braf	10090.ENSMUSP00000002487	GO Process	GO:0048680	Positive regulation of axon regeneration
Braf	10090.ENSMUSP00000002487	GO Process	GO:0048699	Generation of neurons
Braf	10090.ENSMUSP00000002487	GO Process	GO:0048731	System development
Braf	10090.ENSMUSP00000002487	GO Process	GO:0048732	Gland development
Braf	10090.ENSMUSP00000002487	GO Process	GO:0048856	Anatomical structure development
Braf	10090.ENSMUSP00000002487	GO Process	GO:0048869	Cellular developmental process
Braf	10090.ENSMUSP00000002487	GO Process	GO:0050767	Regulation of neurogenesis
Braf	10090.ENSMUSP00000002487	GO Process	GO:0050769	Positive regulation of neurogenesis
Braf	10090.ENSMUSP00000002487	GO Process	GO:0050770	Regulation of axonogenesis
Braf	10090.ENSMUSP00000002487	GO Process	GO:0050772	Positive regulation of axonogenesis
Braf	10090.ENSMUSP00000002487	GO Process	GO:0050776	Regulation of immune response
Braf	10090.ENSMUSP00000002487	GO Process	GO:0050778	Positive regulation of immune response
Braf	10090.ENSMUSP00000002487	GO Process	GO:0050789	Regulation of biological process
Braf	10090.ENSMUSP00000002487	GO Process	GO:0050790	Regulation of catalytic activity
Braf	10090.ENSMUSP00000002487	GO Process	GO:0050793	Regulation of developmental process
Braf	10090.ENSMUSP00000002487	GO Process	GO:0050794	Regulation of cellular process
Braf	10090.ENSMUSP00000002487	GO Process	GO:0050804	Modulation of chemical synaptic transmission
Braf	10090.ENSMUSP00000002487	GO Process	GO:0050805	Negative regulation of synaptic transmission
Braf	10090.ENSMUSP00000002487	GO Process	GO:0050806	Positive regulation of synaptic transmission
Braf	10090.ENSMUSP00000002487	GO Process	GO:0050851	Antigen receptor-mediated signaling pathway
Braf	10090.ENSMUSP00000002487	GO Process	GO:0050852	T cell receptor signaling pathway
Braf	10090.ENSMUSP00000002487	GO Process	GO:0050863	Regulation of t cell activation
Braf	10090.ENSMUSP00000002487	GO Process	GO:0050865	Regulation of cell activation
Braf	10090.ENSMUSP00000002487	GO Process	GO:0050877	Nervous system process
Braf	10090.ENSMUSP00000002487	GO Process	GO:0050890	Cognition
Braf	10090.ENSMUSP00000002487	GO Process	GO:0050896	Response to stimulus
Braf	10090.ENSMUSP00000002487	GO Process	GO:0051046	Regulation of secretion
Braf	10090.ENSMUSP00000002487	GO Process	GO:0051048	Negative regulation of secretion
Braf	10090.ENSMUSP00000002487	GO Process	GO:0051049	Regulation of transport
Braf	10090.ENSMUSP00000002487	GO Process	GO:0051050	Positive regulation of transport
Braf	10090.ENSMUSP00000002487	GO Process	GO:0051051	Negative regulation of transport
Braf	10090.ENSMUSP00000002487	GO Process	GO:0051094	Positive regulation of developmental process
Braf	10090.ENSMUSP00000002487	GO Process	GO:0051128	Regulation of cellular component organization
Braf	10090.ENSMUSP00000002487	GO Process	GO:0051130	Positive regulation of cellular component organization
Braf	10090.ENSMUSP00000002487	GO Process	GO:0051171	Regulation of nitrogen compound metabolic process
Braf	10090.ENSMUSP00000002487	GO Process	GO:0051173	Positive regulation of nitrogen compound metabolic process
Braf	10090.ENSMUSP00000002487	GO Process	GO:0051174	Regulation of phosphorus metabolic process
Braf	10090.ENSMUSP00000002487	GO Process	GO:0051179	Localization
Braf	10090.ENSMUSP00000002487	GO Process	GO:0051234	Establishment of localization
Braf	10090.ENSMUSP00000002487	GO Process	GO:0051239	Regulation of multicellular organismal process
Braf	10090.ENSMUSP00000002487	GO Process	GO:0051240	Positive regulation of multicellular organismal process
Braf	10090.ENSMUSP00000002487	GO Process	GO:0051246	Regulation of protein metabolic process
Braf	10090.ENSMUSP00000002487	GO Process	GO:0051247	Positive regulation of protein metabolic process
Braf	10090.ENSMUSP00000002487	GO Process	GO:0051249	Regulation of lymphocyte activation
Braf	10090.ENSMUSP00000002487	GO Process	GO:0051270	Regulation of cellular component movement
Braf	10090.ENSMUSP00000002487	GO Process	GO:0051271	Negative regulation of cellular component movement
Braf	10090.ENSMUSP00000002487	GO Process	GO:0051338	Regulation of transferase activity
Braf	10090.ENSMUSP00000002487	GO Process	GO:0051347	Positive regulation of transferase activity
Braf	10090.ENSMUSP00000002487	GO Process	GO:0051492	Regulation of stress fiber assembly
Braf	10090.ENSMUSP00000002487	GO Process	GO:0051493	Regulation of cytoskeleton organization
Braf	10090.ENSMUSP00000002487	GO Process	GO:0051495	Positive regulation of cytoskeleton organization
Braf	10090.ENSMUSP00000002487	GO Process	GO:0051496	Positive regulation of stress fiber assembly
Braf	10090.ENSMUSP00000002487	GO Process	GO:0051588	Regulation of neurotransmitter transport
Braf	10090.ENSMUSP00000002487	GO Process	GO:0051589	Negative regulation of neurotransmitter transport
Braf	10090.ENSMUSP00000002487	GO Process	GO:0051591	Response to camp
Braf	10090.ENSMUSP00000002487	GO Process	GO:0051592	Response to calcium ion
Braf	10090.ENSMUSP00000002487	GO Process	GO:0051641	Cellular localization
Braf	10090.ENSMUSP00000002487	GO Process	GO:0051716	Cellular response to stimulus
Braf	10090.ENSMUSP00000002487	GO Process	GO:0051960	Regulation of nervous system development
Braf	10090.ENSMUSP00000002487	GO Process	GO:0051962	Positive regulation of nervous system development
Braf	10090.ENSMUSP00000002487	GO Process	GO:0060255	Regulation of macromolecule metabolic process
Braf	10090.ENSMUSP00000002487	GO Process	GO:0060284	Regulation of cell development
Braf	10090.ENSMUSP00000002487	GO Process	GO:0060291	Long-term synaptic potentiation
Braf	10090.ENSMUSP00000002487	GO Process	GO:0060322	Head development
Braf	10090.ENSMUSP00000002487	GO Process	GO:0060323	Head morphogenesis
Braf	10090.ENSMUSP00000002487	GO Process	GO:0060324	Face development
Braf	10090.ENSMUSP00000002487	GO Process	GO:0060341	Regulation of cellular localization
Braf	10090.ENSMUSP00000002487	GO Process	GO:0060548	Negative regulation of cell death
Braf	10090.ENSMUSP00000002487	GO Process	GO:0060627	Regulation of vesicle-mediated transport
Braf	10090.ENSMUSP00000002487	GO Process	GO:0065007	Biological regulation
Braf	10090.ENSMUSP00000002487	GO Process	GO:0065008	Regulation of biological quality
Braf	10090.ENSMUSP00000002487	GO Process	GO:0065009	Regulation of molecular function
Braf	10090.ENSMUSP00000002487	GO Process	GO:0070372	Regulation of erk1 and erk2 cascade
Braf	10090.ENSMUSP00000002487	GO Process	GO:0070374	Positive regulation of erk1 and erk2 cascade
Braf	10090.ENSMUSP00000002487	GO Process	GO:0070413	Trehalose metabolism in response to stress
Braf	10090.ENSMUSP00000002487	GO Process	GO:0070570	Regulation of neuron projection regeneration
Braf	10090.ENSMUSP00000002487	GO Process	GO:0070572	Positive regulation of neuron projection regeneration
Braf	10090.ENSMUSP00000002487	GO Process	GO:0070727	Cellular macromolecule localization
Braf	10090.ENSMUSP00000002487	GO Process	GO:0070848	Response to growth factor
Braf	10090.ENSMUSP00000002487	GO Process	GO:0070887	Cellular response to chemical stimulus
Braf	10090.ENSMUSP00000002487	GO Process	GO:0071241	Cellular response to inorganic substance
Braf	10090.ENSMUSP00000002487	GO Process	GO:0071248	Cellular response to metal ion
Braf	10090.ENSMUSP00000002487	GO Process	GO:0071277	Cellular response to calcium ion
Braf	10090.ENSMUSP00000002487	GO Process	GO:0071310	Cellular response to organic substance
Braf	10090.ENSMUSP00000002487	GO Process	GO:0071363	Cellular response to growth factor stimulus
Braf	10090.ENSMUSP00000002487	GO Process	GO:0071495	Cellular response to endogenous stimulus
Braf	10090.ENSMUSP00000002487	GO Process	GO:0071704	Organic substance metabolic process
Braf	10090.ENSMUSP00000002487	GO Process	GO:0071900	Regulation of protein serine/threonine kinase activity
Braf	10090.ENSMUSP00000002487	GO Process	GO:0071902	Positive regulation of protein serine/threonine kinase activity
Braf	10090.ENSMUSP00000002487	GO Process	GO:0072657	Protein localization to membrane
Braf	10090.ENSMUSP00000002487	GO Process	GO:0080090	Regulation of primary metabolic process
Braf	10090.ENSMUSP00000002487	GO Process	GO:0080134	Regulation of response to stress
Braf	10090.ENSMUSP00000002487	GO Process	GO:0080135	Regulation of cellular response to stress
Braf	10090.ENSMUSP00000002487	GO Process	GO:0090150	Establishment of protein localization to membrane
Braf	10090.ENSMUSP00000002487	GO Process	GO:0098693	Regulation of synaptic vesicle cycle
Braf	10090.ENSMUSP00000002487	GO Process	GO:0098727	Maintenance of cell number
Braf	10090.ENSMUSP00000002487	GO Process	GO:0099177	Regulation of trans-synaptic signaling
Braf	10090.ENSMUSP00000002487	GO Process	GO:0110020	Regulation of actomyosin structure organization
Braf	10090.ENSMUSP00000002487	GO Process	GO:0110053	Regulation of actin filament organization
Braf	10090.ENSMUSP00000002487	GO Process	GO:0120035	Regulation of plasma membrane bounded cell projection organization
Braf	10090.ENSMUSP00000002487	GO Process	GO:1900024	Regulation of substrate adhesion-dependent cell spreading
Braf	10090.ENSMUSP00000002487	GO Process	GO:1900026	Positive regulation of substrate adhesion-dependent cell spreading
Braf	10090.ENSMUSP00000002487	GO Process	GO:1901214	Regulation of neuron death
Braf	10090.ENSMUSP00000002487	GO Process	GO:1901215	Negative regulation of neuron death
Braf	10090.ENSMUSP00000002487	GO Process	GO:1901564	Organonitrogen compound metabolic process
Braf	10090.ENSMUSP00000002487	GO Process	GO:1901652	Response to peptide
Braf	10090.ENSMUSP00000002487	GO Process	GO:1901698	Response to nitrogen compound
Braf	10090.ENSMUSP00000002487	GO Process	GO:1901700	Response to oxygen-containing compound
Braf	10090.ENSMUSP00000002487	GO Process	GO:1902105	Regulation of leukocyte differentiation
Braf	10090.ENSMUSP00000002487	GO Process	GO:1902531	Regulation of intracellular signal transduction
Braf	10090.ENSMUSP00000002487	GO Process	GO:1902533	Positive regulation of intracellular signal transduction
Braf	10090.ENSMUSP00000002487	GO Process	GO:1902903	Regulation of supramolecular fiber organization
Braf	10090.ENSMUSP00000002487	GO Process	GO:1902905	Positive regulation of supramolecular fiber organization
Braf	10090.ENSMUSP00000002487	GO Process	GO:1903034	Regulation of response to wounding
Braf	10090.ENSMUSP00000002487	GO Process	GO:1903036	Positive regulation of response to wounding
Braf	10090.ENSMUSP00000002487	GO Process	GO:1903305	Regulation of regulated secretory pathway
Braf	10090.ENSMUSP00000002487	GO Process	GO:1903306	Negative regulation of regulated secretory pathway
Braf	10090.ENSMUSP00000002487	GO Process	GO:1903530	Regulation of secretion by cell
Braf	10090.ENSMUSP00000002487	GO Process	GO:1903531	Negative regulation of secretion by cell
Braf	10090.ENSMUSP00000002487	GO Process	GO:1903706	Regulation of hemopoiesis
Braf	10090.ENSMUSP00000002487	GO Process	GO:1904035	Regulation of epithelial cell apoptotic process
Braf	10090.ENSMUSP00000002487	GO Process	GO:1904036	Negative regulation of epithelial cell apoptotic process
Braf	10090.ENSMUSP00000002487	GO Process	GO:1990089	Response to nerve growth factor
Braf	10090.ENSMUSP00000002487	GO Process	GO:1990090	Cellular response to nerve growth factor stimulus
Braf	10090.ENSMUSP00000002487	GO Process	GO:2000026	Regulation of multicellular organismal development
Braf	10090.ENSMUSP00000002487	GO Process	GO:2000145	Regulation of cell motility
Braf	10090.ENSMUSP00000002487	GO Process	GO:2000146	Negative regulation of cell motility
Braf	10090.ENSMUSP00000002487	GO Process	GO:2000300	Regulation of synaptic vesicle exocytosis
Braf	10090.ENSMUSP00000002487	GO Process	GO:2000301	Negative regulation of synaptic vesicle exocytosis
Braf	10090.ENSMUSP00000002487	GO Process	GO:2000351	Regulation of endothelial cell apoptotic process
Braf	10090.ENSMUSP00000002487	GO Process	GO:2000352	Negative regulation of endothelial cell apoptotic process
Braf	10090.ENSMUSP00000002487	GO Function	GO:0000166	Nucleotide binding
Braf	10090.ENSMUSP00000002487	GO Function	GO:0003824	Catalytic activity
Braf	10090.ENSMUSP00000002487	GO Function	GO:0004672	Protein kinase activity
Braf	10090.ENSMUSP00000002487	GO Function	GO:0004674	Protein serine/threonine kinase activity
Braf	10090.ENSMUSP00000002487	GO Function	GO:0004709	MAP kinase kinase kinase activity
Braf	10090.ENSMUSP00000002487	GO Function	GO:0005488	Binding
Braf	10090.ENSMUSP00000002487	GO Function	GO:0005509	Calcium ion binding
Braf	10090.ENSMUSP00000002487	GO Function	GO:0005515	Protein binding
Braf	10090.ENSMUSP00000002487	GO Function	GO:0005524	ATP binding
Braf	10090.ENSMUSP00000002487	GO Function	GO:0016301	Kinase activity
Braf	10090.ENSMUSP00000002487	GO Function	GO:0016740	Transferase activity
Braf	10090.ENSMUSP00000002487	GO Function	GO:0016772	Transferase activity, transferring phosphorus-containing groups
Braf	10090.ENSMUSP00000002487	GO Function	GO:0016773	Phosphotransferase activity, alcohol group as acceptor
Braf	10090.ENSMUSP00000002487	GO Function	GO:0017016	Ras GTPase binding
Braf	10090.ENSMUSP00000002487	GO Function	GO:0017076	Purine nucleotide binding
Braf	10090.ENSMUSP00000002487	GO Function	GO:0019899	Enzyme binding
Braf	10090.ENSMUSP00000002487	GO Function	GO:0019900	Kinase binding
Braf	10090.ENSMUSP00000002487	GO Function	GO:0019901	Protein kinase binding
Braf	10090.ENSMUSP00000002487	GO Function	GO:0030554	Adenyl nucleotide binding
Braf	10090.ENSMUSP00000002487	GO Function	GO:0031267	Small gtpase binding
Braf	10090.ENSMUSP00000002487	GO Function	GO:0031434	Mitogen-activated protein kinase kinase binding
Braf	10090.ENSMUSP00000002487	GO Function	GO:0032553	Ribonucleotide binding
Braf	10090.ENSMUSP00000002487	GO Function	GO:0032555	Purine ribonucleotide binding
Braf	10090.ENSMUSP00000002487	GO Function	GO:0032559	Adenyl ribonucleotide binding
Braf	10090.ENSMUSP00000002487	GO Function	GO:0035639	Purine ribonucleoside triphosphate binding
Braf	10090.ENSMUSP00000002487	GO Function	GO:0036094	Small molecule binding
Braf	10090.ENSMUSP00000002487	GO Function	GO:0042802	Identical protein binding
Braf	10090.ENSMUSP00000002487	GO Function	GO:0043167	Ion binding
Braf	10090.ENSMUSP00000002487	GO Function	GO:0043168	Anion binding
Braf	10090.ENSMUSP00000002487	GO Function	GO:0043169	Cation binding
Braf	10090.ENSMUSP00000002487	GO Function	GO:0044877	Protein-containing complex binding
Braf	10090.ENSMUSP00000002487	GO Function	GO:0046872	Metal ion binding
Braf	10090.ENSMUSP00000002487	GO Function	GO:0051020	GTPase binding
Braf	10090.ENSMUSP00000002487	GO Function	GO:0097110	Scaffold protein binding
Braf	10090.ENSMUSP00000002487	GO Function	GO:0097159	Organic cyclic compound binding
Braf	10090.ENSMUSP00000002487	GO Function	GO:0097367	Carbohydrate derivative binding
Braf	10090.ENSMUSP00000002487	GO Function	GO:0140096	Catalytic activity, acting on a protein
Braf	10090.ENSMUSP00000002487	GO Function	GO:1901265	Nucleoside phosphate binding
Braf	10090.ENSMUSP00000002487	GO Function	GO:1901363	Heterocyclic compound binding
Braf	10090.ENSMUSP00000002487	GO Component	GO:0005622	Intracellular
Braf	10090.ENSMUSP00000002487	GO Component	GO:0005634	Nucleus
Braf	10090.ENSMUSP00000002487	GO Component	GO:0005737	Cytoplasm
Braf	10090.ENSMUSP00000002487	GO Component	GO:0005739	Mitochondrion
Braf	10090.ENSMUSP00000002487	GO Component	GO:0005829	Cytosol
Braf	10090.ENSMUSP00000002487	GO Component	GO:0005886	Plasma membrane
Braf	10090.ENSMUSP00000002487	GO Component	GO:0016020	Membrane
Braf	10090.ENSMUSP00000002487	GO Component	GO:0042995	Cell projection
Braf	10090.ENSMUSP00000002487	GO Component	GO:0043005	Neuron projection
Braf	10090.ENSMUSP00000002487	GO Component	GO:0043226	Organelle
Braf	10090.ENSMUSP00000002487	GO Component	GO:0043227	Membrane-bounded organelle
Braf	10090.ENSMUSP00000002487	GO Component	GO:0043229	Intracellular organelle
Braf	10090.ENSMUSP00000002487	GO Component	GO:0043231	Intracellular membrane-bounded organelle
Braf	10090.ENSMUSP00000002487	GO Component	GO:0044297	Cell body
Braf	10090.ENSMUSP00000002487	GO Component	GO:0071944	Cell periphery
Braf	10090.ENSMUSP00000002487	GO Component	GO:0110165	Cellular anatomical entity
Braf	10090.ENSMUSP00000002487	GO Component	GO:0120025	Plasma membrane bounded cell projection
Braf	10090.ENSMUSP00000002487	STRING clusters	CL:12196	Mixed, incl. mapk signaling pathway, and ras gtpase-activating protein
Braf	10090.ENSMUSP00000002487	STRING clusters	CL:12294	Mixed, incl. map2k and mapk activation, and btk motif
Braf	10090.ENSMUSP00000002487	STRING clusters	CL:12334	Mixed, incl. negative feedback regulation of mapk pathway, and kinase suppressor of ras, sam-like domain
Braf	10090.ENSMUSP00000002487	STRING clusters	CL:12338	Negative feedback regulation of MAPK pathway, and Kinase suppressor of RAS, SAM-like domain
Braf	10090.ENSMUSP00000002487	KEGG	mmu01521	EGFR tyrosine kinase inhibitor resistance
Braf	10090.ENSMUSP00000002487	KEGG	mmu01522	Endocrine resistance
Braf	10090.ENSMUSP00000002487	KEGG	mmu04010	MAPK signaling pathway
Braf	10090.ENSMUSP00000002487	KEGG	mmu04012	ErbB signaling pathway
Braf	10090.ENSMUSP00000002487	KEGG	mmu04015	Rap1 signaling pathway
Braf	10090.ENSMUSP00000002487	KEGG	mmu04024	cAMP signaling pathway
Braf	10090.ENSMUSP00000002487	KEGG	mmu04062	Chemokine signaling pathway
Braf	10090.ENSMUSP00000002487	KEGG	mmu04068	FoxO signaling pathway
Braf	10090.ENSMUSP00000002487	KEGG	mmu04150	mTOR signaling pathway
Braf	10090.ENSMUSP00000002487	KEGG	mmu04270	Vascular smooth muscle contraction
Braf	10090.ENSMUSP00000002487	KEGG	mmu04510	Focal adhesion
Braf	10090.ENSMUSP00000002487	KEGG	mmu04650	Natural killer cell mediated cytotoxicity
Braf	10090.ENSMUSP00000002487	KEGG	mmu04720	Long-term potentiation
Braf	10090.ENSMUSP00000002487	KEGG	mmu04722	Neurotrophin signaling pathway
Braf	10090.ENSMUSP00000002487	KEGG	mmu04726	Serotonergic synapse
Braf	10090.ENSMUSP00000002487	KEGG	mmu04730	Long-term depression
Braf	10090.ENSMUSP00000002487	KEGG	mmu04810	Regulation of actin cytoskeleton
Braf	10090.ENSMUSP00000002487	KEGG	mmu04910	Insulin signaling pathway
Braf	10090.ENSMUSP00000002487	KEGG	mmu04914	Progesterone-mediated oocyte maturation
Braf	10090.ENSMUSP00000002487	KEGG	mmu04928	Parathyroid hormone synthesis, secretion and action
Braf	10090.ENSMUSP00000002487	KEGG	mmu04934	Cushing syndrome
Braf	10090.ENSMUSP00000002487	KEGG	mmu05010	Alzheimer disease
Braf	10090.ENSMUSP00000002487	KEGG	mmu05034	Alcoholism
Braf	10090.ENSMUSP00000002487	KEGG	mmu05160	Hepatitis C
Braf	10090.ENSMUSP00000002487	KEGG	mmu05161	Hepatitis B
Braf	10090.ENSMUSP00000002487	KEGG	mmu05200	Pathways in cancer
Braf	10090.ENSMUSP00000002487	KEGG	mmu05205	Proteoglycans in cancer
Braf	10090.ENSMUSP00000002487	KEGG	mmu05210	Colorectal cancer
Braf	10090.ENSMUSP00000002487	KEGG	mmu05211	Renal cell carcinoma
Braf	10090.ENSMUSP00000002487	KEGG	mmu05212	Pancreatic cancer
Braf	10090.ENSMUSP00000002487	KEGG	mmu05213	Endometrial cancer
Braf	10090.ENSMUSP00000002487	KEGG	mmu05214	Glioma
Braf	10090.ENSMUSP00000002487	KEGG	mmu05215	Prostate cancer
Braf	10090.ENSMUSP00000002487	KEGG	mmu05216	Thyroid cancer
Braf	10090.ENSMUSP00000002487	KEGG	mmu05218	Melanoma
Braf	10090.ENSMUSP00000002487	KEGG	mmu05219	Bladder cancer
Braf	10090.ENSMUSP00000002487	KEGG	mmu05220	Chronic myeloid leukemia
Braf	10090.ENSMUSP00000002487	KEGG	mmu05221	Acute myeloid leukemia
Braf	10090.ENSMUSP00000002487	KEGG	mmu05223	Non-small cell lung cancer
Braf	10090.ENSMUSP00000002487	KEGG	mmu05224	Breast cancer
Braf	10090.ENSMUSP00000002487	KEGG	mmu05225	Hepatocellular carcinoma
Braf	10090.ENSMUSP00000002487	KEGG	mmu05226	Gastric cancer
Braf	10090.ENSMUSP00000002487	Reactome	MMU-1295596	Spry regulation of FGF signaling
Braf	10090.ENSMUSP00000002487	Reactome	MMU-162582	Signal Transduction
Braf	10090.ENSMUSP00000002487	Reactome	MMU-166520	Signaling by NTRKs
Braf	10090.ENSMUSP00000002487	Reactome	MMU-169893	Prolonged ERK activation events
Braf	10090.ENSMUSP00000002487	Reactome	MMU-170968	Frs2-mediated activation
Braf	10090.ENSMUSP00000002487	Reactome	MMU-187037	Signaling by NTRK1 (TRKA)
Braf	10090.ENSMUSP00000002487	Reactome	MMU-187687	Signalling to ERKs
Braf	10090.ENSMUSP00000002487	Reactome	MMU-190236	Signaling by FGFR
Braf	10090.ENSMUSP00000002487	Reactome	MMU-5654726	Negative regulation of FGFR1 signaling
Braf	10090.ENSMUSP00000002487	Reactome	MMU-5654727	Negative regulation of FGFR2 signaling
Braf	10090.ENSMUSP00000002487	Reactome	MMU-5654732	Negative regulation of FGFR3 signaling
Braf	10090.ENSMUSP00000002487	Reactome	MMU-5654733	Negative regulation of FGFR4 signaling
Braf	10090.ENSMUSP00000002487	Reactome	MMU-5654736	Signaling by FGFR1
Braf	10090.ENSMUSP00000002487	Reactome	MMU-5654738	Signaling by FGFR2
Braf	10090.ENSMUSP00000002487	Reactome	MMU-5654741	Signaling by FGFR3
Braf	10090.ENSMUSP00000002487	Reactome	MMU-5654743	Signaling by FGFR4
Braf	10090.ENSMUSP00000002487	Reactome	MMU-5673000	RAF activation
Braf	10090.ENSMUSP00000002487	Reactome	MMU-5673001	RAF/MAP kinase cascade
Braf	10090.ENSMUSP00000002487	Reactome	MMU-5674135	MAP2K and MAPK activation
Braf	10090.ENSMUSP00000002487	Reactome	MMU-5674499	Negative feedback regulation of MAPK pathway
Braf	10090.ENSMUSP00000002487	Reactome	MMU-5675221	Negative regulation of MAPK pathway
Braf	10090.ENSMUSP00000002487	Reactome	MMU-5683057	MAPK family signaling cascades
Braf	10090.ENSMUSP00000002487	Reactome	MMU-5684996	MAPK1/MAPK3 signaling
Braf	10090.ENSMUSP00000002487	Reactome	MMU-9006934	Signaling by Receptor Tyrosine Kinases
Braf	10090.ENSMUSP00000002487	WikiPathways	WP1244	Estrogen signaling
Braf	10090.ENSMUSP00000002487	WikiPathways	WP2292	Chemokine signaling pathway
Braf	10090.ENSMUSP00000002487	WikiPathways	WP251	Mapk cascade
Braf	10090.ENSMUSP00000002487	WikiPathways	WP339	ESC pluripotency pathways
Braf	10090.ENSMUSP00000002487	WikiPathways	WP3654	Novel Jun-Dmp1 pathway
Braf	10090.ENSMUSP00000002487	WikiPathways	WP493	Mapk signaling pathway
Braf	10090.ENSMUSP00000002487	WikiPathways	WP523	Regulation of actin cytoskeleton
Braf	10090.ENSMUSP00000002487	WikiPathways	WP6	Integrin-mediated cell adhesion
Braf	10090.ENSMUSP00000002487	WikiPathways	WP85	Focal adhesion
Braf	10090.ENSMUSP00000002487	TISSUES	BTO:0000000	Tissues, cell types and enzyme sources
Braf	10090.ENSMUSP00000002487	TISSUES	BTO:0000042	Animal
Braf	10090.ENSMUSP00000002487	TISSUES	BTO:0000345	Digestive gland
Braf	10090.ENSMUSP00000002487	TISSUES	BTO:0000522	Gland
Braf	10090.ENSMUSP00000002487	TISSUES	BTO:0000759	Liver
Braf	10090.ENSMUSP00000002487	TISSUES	BTO:0000848	Melanoma cell
Braf	10090.ENSMUSP00000002487	TISSUES	BTO:0000849	Melanoma cell line
Braf	10090.ENSMUSP00000002487	TISSUES	BTO:0001286	Skin cancer cell
Braf	10090.ENSMUSP00000002487	TISSUES	BTO:0001488	Endocrine gland
Braf	10090.ENSMUSP00000002487	TISSUES	BTO:0001489	Whole body
Braf	10090.ENSMUSP00000002487	TISSUES	BTO:0001491	Viscus
Braf	10090.ENSMUSP00000002487	TISSUES	BTO:0002130	SK-MEL cell
Braf	10090.ENSMUSP00000002487	TISSUES	BTO:0002131	SK-MEL-28 cell
Braf	10090.ENSMUSP00000002487	TISSUES	BTO:0002134	SK-MEL-5 cell
Braf	10090.ENSMUSP00000002487	TISSUES	BTO:0002806	A-375 cell
Braf	10090.ENSMUSP00000002487	TISSUES	BTO:0003075	WM-115 cell
Braf	10090.ENSMUSP00000002487	COMPARTMENTS	GOCC:0005622	Intracellular
Braf	10090.ENSMUSP00000002487	COMPARTMENTS	GOCC:0005634	Nucleus
Braf	10090.ENSMUSP00000002487	COMPARTMENTS	GOCC:0005737	Cytoplasm
Braf	10090.ENSMUSP00000002487	COMPARTMENTS	GOCC:0005739	Mitochondrion
Braf	10090.ENSMUSP00000002487	COMPARTMENTS	GOCC:0005829	Cytosol
Braf	10090.ENSMUSP00000002487	COMPARTMENTS	GOCC:0005886	Plasma membrane
Braf	10090.ENSMUSP00000002487	COMPARTMENTS	GOCC:0016020	Membrane
Braf	10090.ENSMUSP00000002487	COMPARTMENTS	GOCC:0042995	Cell projection
Braf	10090.ENSMUSP00000002487	COMPARTMENTS	GOCC:0043005	Neuron projection
Braf	10090.ENSMUSP00000002487	COMPARTMENTS	GOCC:0043226	Organelle
Braf	10090.ENSMUSP00000002487	COMPARTMENTS	GOCC:0043227	Membrane-bounded organelle
Braf	10090.ENSMUSP00000002487	COMPARTMENTS	GOCC:0043229	Intracellular organelle
Braf	10090.ENSMUSP00000002487	COMPARTMENTS	GOCC:0043231	Intracellular membrane-bounded organelle
Braf	10090.ENSMUSP00000002487	COMPARTMENTS	GOCC:0044297	Cell body
Braf	10090.ENSMUSP00000002487	COMPARTMENTS	GOCC:0071944	Cell periphery
Braf	10090.ENSMUSP00000002487	COMPARTMENTS	GOCC:0110165	Cellular anatomical entity
Braf	10090.ENSMUSP00000002487	COMPARTMENTS	GOCC:0120025	Plasma membrane bounded cell projection
Braf	10090.ENSMUSP00000002487	Monarch MPO	MP:0000003	Abnormal adipose tissue morphology
Braf	10090.ENSMUSP00000002487	Monarch MPO	MP:0000074	Abnormal neurocranium morphology
Braf	10090.ENSMUSP00000002487	Monarch MPO	MP:0000107	Abnormal frontal bone morphology
Braf	10090.ENSMUSP00000002487	Monarch MPO	MP:0000172	Abnormal bone marrow cell number
Braf	10090.ENSMUSP00000002487	Monarch MPO	MP:0000217	Abnormal leukocyte cell number
Braf	10090.ENSMUSP00000002487	Monarch MPO	MP:0000221	Decreased leukocyte cell number
Braf	10090.ENSMUSP00000002487	Monarch MPO	MP:0000259	Abnormal vascular development
Braf	10090.ENSMUSP00000002487	Monarch MPO	MP:0000260	Abnormal angiogenesis
Braf	10090.ENSMUSP00000002487	Monarch MPO	MP:0000266	Abnormal heart morphology
Braf	10090.ENSMUSP00000002487	Monarch MPO	MP:0000267	Abnormal heart development
Braf	10090.ENSMUSP00000002487	Monarch MPO	MP:0000274	Enlarged heart
Braf	10090.ENSMUSP00000002487	Monarch MPO	MP:0000275	Heart hyperplasia
Braf	10090.ENSMUSP00000002487	Monarch MPO	MP:0000278	Abnormal myocardial fiber morphology
Braf	10090.ENSMUSP00000002487	Monarch MPO	MP:0000281	Abnormal interventricular septum morphology
Braf	10090.ENSMUSP00000002487	Monarch MPO	MP:0000285	Abnormal heart valve morphology
Braf	10090.ENSMUSP00000002487	Monarch MPO	MP:0000286	Abnormal mitral valve morphology
Braf	10090.ENSMUSP00000002487	Monarch MPO	MP:0000288	Abnormal pericardium morphology
Braf	10090.ENSMUSP00000002487	Monarch MPO	MP:0000297	Abnormal atrioventricular cushion morphology
Braf	10090.ENSMUSP00000002487	Monarch MPO	MP:0000313	Abnormal cell death
Braf	10090.ENSMUSP00000002487	Monarch MPO	MP:0000333	Decreased bone marrow cell number
Braf	10090.ENSMUSP00000002487	Monarch MPO	MP:0000350	Abnormal cell proliferation
Braf	10090.ENSMUSP00000002487	Monarch MPO	MP:0000351	Increased cell proliferation
Braf	10090.ENSMUSP00000002487	Monarch MPO	MP:0000358	Abnormal cell morphology
Braf	10090.ENSMUSP00000002487	Monarch MPO	MP:0000367	Abnormal coat/ hair morphology
Braf	10090.ENSMUSP00000002487	Monarch MPO	MP:0000420	Ruffled hair
Braf	10090.ENSMUSP00000002487	Monarch MPO	MP:0000428	Abnormal craniofacial morphology
Braf	10090.ENSMUSP00000002487	Monarch MPO	MP:0000432	Abnormal head morphology
Braf	10090.ENSMUSP00000002487	Monarch MPO	MP:0000438	Abnormal cranium morphology
Braf	10090.ENSMUSP00000002487	Monarch MPO	MP:0000452	Abnormal mouth morphology
Braf	10090.ENSMUSP00000002487	Monarch MPO	MP:0000454	Abnormal jaw morphology
Braf	10090.ENSMUSP00000002487	Monarch MPO	MP:0000458	Abnormal mandible morphology
Braf	10090.ENSMUSP00000002487	Monarch MPO	MP:0000460	Mandible hypoplasia
Braf	10090.ENSMUSP00000002487	Monarch MPO	MP:0000462	Abnormal digestive system morphology
Braf	10090.ENSMUSP00000002487	Monarch MPO	MP:0000477	Abnormal intestine morphology
Braf	10090.ENSMUSP00000002487	Monarch MPO	MP:0000488	Abnormal intestinal epithelium morphology
Braf	10090.ENSMUSP00000002487	Monarch MPO	MP:0000489	Abnormal large intestine morphology
Braf	10090.ENSMUSP00000002487	Monarch MPO	MP:0000490	Abnormal crypts of lieberkuhn morphology
Braf	10090.ENSMUSP00000002487	Monarch MPO	MP:0000496	Abnormal small intestine morphology
Braf	10090.ENSMUSP00000002487	Monarch MPO	MP:0000511	Abnormal intestinal mucosa morphology
Braf	10090.ENSMUSP00000002487	Monarch MPO	MP:0000516	Abnormal renal/urinary system morphology
Braf	10090.ENSMUSP00000002487	Monarch MPO	MP:0000579	Abnormal nail morphology
Braf	10090.ENSMUSP00000002487	Monarch MPO	MP:0000598	Abnormal liver morphology
Braf	10090.ENSMUSP00000002487	Monarch MPO	MP:0000601	Small liver
Braf	10090.ENSMUSP00000002487	Monarch MPO	MP:0000631	Abnormal neuroendocrine gland morphology
Braf	10090.ENSMUSP00000002487	Monarch MPO	MP:0000633	Abnormal pituitary gland morphology
Braf	10090.ENSMUSP00000002487	Monarch MPO	MP:0000647	Abnormal sebaceous gland morphology
Braf	10090.ENSMUSP00000002487	Monarch MPO	MP:0000681	Abnormal thyroid gland morphology
Braf	10090.ENSMUSP00000002487	Monarch MPO	MP:0000685	Abnormal immune system morphology
Braf	10090.ENSMUSP00000002487	Monarch MPO	MP:0000688	Lymphoid hyperplasia
Braf	10090.ENSMUSP00000002487	Monarch MPO	MP:0000689	Abnormal spleen morphology
Braf	10090.ENSMUSP00000002487	Monarch MPO	MP:0000691	Enlarged spleen
Braf	10090.ENSMUSP00000002487	Monarch MPO	MP:0000692	Small spleen
Braf	10090.ENSMUSP00000002487	Monarch MPO	MP:0000701	Abnormal lymph node size
Braf	10090.ENSMUSP00000002487	Monarch MPO	MP:0000702	Enlarged lymph nodes
Braf	10090.ENSMUSP00000002487	Monarch MPO	MP:0000703	Abnormal thymus morphology
Braf	10090.ENSMUSP00000002487	Monarch MPO	MP:0000706	Small thymus
Braf	10090.ENSMUSP00000002487	Monarch MPO	MP:0000715	Decreased thymocyte number
Braf	10090.ENSMUSP00000002487	Monarch MPO	MP:0000716	Abnormal immune system cell morphology
Braf	10090.ENSMUSP00000002487	Monarch MPO	MP:0000717	Abnormal lymphocyte cell number
Braf	10090.ENSMUSP00000002487	Monarch MPO	MP:0000771	Abnormal brain size
Braf	10090.ENSMUSP00000002487	Monarch MPO	MP:0000774	Decreased brain size
Braf	10090.ENSMUSP00000002487	Monarch MPO	MP:0000783	Abnormal forebrain morphology
Braf	10090.ENSMUSP00000002487	Monarch MPO	MP:0000787	Abnormal telencephalon morphology
Braf	10090.ENSMUSP00000002487	Monarch MPO	MP:0000788	Abnormal cerebral cortex morphology
Braf	10090.ENSMUSP00000002487	Monarch MPO	MP:0000790	Abnormal stratification in cerebral cortex
Braf	10090.ENSMUSP00000002487	Monarch MPO	MP:0000794	Abnormal parietal lobe morphology
Braf	10090.ENSMUSP00000002487	Monarch MPO	MP:0000801	Abnormal temporal lobe morphology
Braf	10090.ENSMUSP00000002487	Monarch MPO	MP:0000804	Abnormal occipital lobe morphology
Braf	10090.ENSMUSP00000002487	Monarch MPO	MP:0000805	Abnormal visual cortex morphology
Braf	10090.ENSMUSP00000002487	Monarch MPO	MP:0000807	Abnormal hippocampus morphology
Braf	10090.ENSMUSP00000002487	Monarch MPO	MP:0000813	Abnormal hippocampus layer morphology
Braf	10090.ENSMUSP00000002487	Monarch MPO	MP:0000830	Abnormal diencephalon morphology
Braf	10090.ENSMUSP00000002487	Monarch MPO	MP:0000841	Abnormal hindbrain morphology
Braf	10090.ENSMUSP00000002487	Monarch MPO	MP:0000847	Abnormal metencephalon morphology
Braf	10090.ENSMUSP00000002487	Monarch MPO	MP:0000849	Abnormal cerebellum morphology
Braf	10090.ENSMUSP00000002487	Monarch MPO	MP:0000858	Abnormal metastatic potential
Braf	10090.ENSMUSP00000002487	Monarch MPO	MP:0000859	Abnormal somatosensory cortex morphology
Braf	10090.ENSMUSP00000002487	Monarch MPO	MP:0000864	Abnormal cerebellum vermis morphology
Braf	10090.ENSMUSP00000002487	Monarch MPO	MP:0000867	Abnormal cerebellum anterior vermis morphology
Braf	10090.ENSMUSP00000002487	Monarch MPO	MP:0000869	Abnormal cerebellum posterior vermis morphology
Braf	10090.ENSMUSP00000002487	Monarch MPO	MP:0000875	Abnormal cerebellar purkinje cell layer
Braf	10090.ENSMUSP00000002487	Monarch MPO	MP:0000877	Abnormal purkinje cell morphology
Braf	10090.ENSMUSP00000002487	Monarch MPO	MP:0000878	Abnormal purkinje cell number
Braf	10090.ENSMUSP00000002487	Monarch MPO	MP:0000880	Decreased purkinje cell number
Braf	10090.ENSMUSP00000002487	Monarch MPO	MP:0000889	Abnormal cerebellar molecular layer
Braf	10090.ENSMUSP00000002487	Monarch MPO	MP:0000913	Abnormal brain development
Braf	10090.ENSMUSP00000002487	Monarch MPO	MP:0000934	Abnormal telencephalon development
Braf	10090.ENSMUSP00000002487	Monarch MPO	MP:0000947	Convulsive seizures
Braf	10090.ENSMUSP00000002487	Monarch MPO	MP:0000952	Abnormal cns glial cell morphology
Braf	10090.ENSMUSP00000002487	Monarch MPO	MP:0000959	Abnormal somatic sensory system morphology
Braf	10090.ENSMUSP00000002487	Monarch MPO	MP:0000960	Abnormal sensory ganglion morphology
Braf	10090.ENSMUSP00000002487	Monarch MPO	MP:0000961	Abnormal dorsal root ganglion morphology
Braf	10090.ENSMUSP00000002487	Monarch MPO	MP:0001119	Abnormal female reproductive system morphology
Braf	10090.ENSMUSP00000002487	Monarch MPO	MP:0001120	Abnormal uterus morphology
Braf	10090.ENSMUSP00000002487	Monarch MPO	MP:0001182	Lung hemorrhage
Braf	10090.ENSMUSP00000002487	Monarch MPO	MP:0001186	Pigmentation phenotype
Braf	10090.ENSMUSP00000002487	Monarch MPO	MP:0001188	Hyperpigmentation
Braf	10090.ENSMUSP00000002487	Monarch MPO	MP:0001212	Skin lesions
Braf	10090.ENSMUSP00000002487	Monarch MPO	MP:0001243	Abnormal dermal layer morphology
Braf	10090.ENSMUSP00000002487	Monarch MPO	MP:0001259	Abnormal body weight
Braf	10090.ENSMUSP00000002487	Monarch MPO	MP:0001262	Decreased body weight
Braf	10090.ENSMUSP00000002487	Monarch MPO	MP:0001265	Decreased body size
Braf	10090.ENSMUSP00000002487	Monarch MPO	MP:0001272	Increased metastatic potential
Braf	10090.ENSMUSP00000002487	Monarch MPO	MP:0001377	Abnormal mating frequency
Braf	10090.ENSMUSP00000002487	Monarch MPO	MP:0001392	Abnormal locomotor behavior
Braf	10090.ENSMUSP00000002487	Monarch MPO	MP:0001408	Stereotypic behavior
Braf	10090.ENSMUSP00000002487	Monarch MPO	MP:0001412	Excessive scratching
Braf	10090.ENSMUSP00000002487	Monarch MPO	MP:0001431	Abnormal eating behavior
Braf	10090.ENSMUSP00000002487	Monarch MPO	MP:0001440	Abnormal grooming behavior
Braf	10090.ENSMUSP00000002487	Monarch MPO	MP:0001458	Abnormal object recognition memory
Braf	10090.ENSMUSP00000002487	Monarch MPO	MP:0001463	Abnormal spatial learning
Braf	10090.ENSMUSP00000002487	Monarch MPO	MP:0001468	Abnormal temporal memory
Braf	10090.ENSMUSP00000002487	Monarch MPO	MP:0001469	Abnormal contextual conditioning behavior
Braf	10090.ENSMUSP00000002487	Monarch MPO	MP:0001473	Reduced long term potentiation
Braf	10090.ENSMUSP00000002487	Monarch MPO	MP:0001510	Abnormal coat appearance
Braf	10090.ENSMUSP00000002487	Monarch MPO	MP:0001516	Abnormal motor coordination/balance
Braf	10090.ENSMUSP00000002487	Monarch MPO	MP:0001525	Impaired balance
Braf	10090.ENSMUSP00000002487	Monarch MPO	MP:0001544	Abnormal cardiovascular system physiology
Braf	10090.ENSMUSP00000002487	Monarch MPO	MP:0001545	Abnormal hematopoietic system physiology
Braf	10090.ENSMUSP00000002487	Monarch MPO	MP:0001586	Abnormal erythrocyte cell number
Braf	10090.ENSMUSP00000002487	Monarch MPO	MP:0001614	Abnormal blood vessel morphology
Braf	10090.ENSMUSP00000002487	Monarch MPO	MP:0001625	Cardiac hypertrophy
Braf	10090.ENSMUSP00000002487	Monarch MPO	MP:0001633	Poor circulation
Braf	10090.ENSMUSP00000002487	Monarch MPO	MP:0001634	Internal hemorrhage
Braf	10090.ENSMUSP00000002487	Monarch MPO	MP:0001648	Abnormal apoptosis
Braf	10090.ENSMUSP00000002487	Monarch MPO	MP:0001672	Abnormal embryo development
Braf	10090.ENSMUSP00000002487	Monarch MPO	MP:0001697	Abnormal embryo size
Braf	10090.ENSMUSP00000002487	Monarch MPO	MP:0001698	Decreased embryo size
Braf	10090.ENSMUSP00000002487	Monarch MPO	MP:0001711	Abnormal placenta morphology
Braf	10090.ENSMUSP00000002487	Monarch MPO	MP:0001716	Abnormal placenta labyrinth morphology
Braf	10090.ENSMUSP00000002487	Monarch MPO	MP:0001731	Abnormal postnatal growth
Braf	10090.ENSMUSP00000002487	Monarch MPO	MP:0001732	Postnatal growth retardation
Braf	10090.ENSMUSP00000002487	Monarch MPO	MP:0001764	Abnormal homeostasis
Braf	10090.ENSMUSP00000002487	Monarch MPO	MP:0001781	Abnormal white adipose tissue amount
Braf	10090.ENSMUSP00000002487	Monarch MPO	MP:0001783	Decreased white adipose tissue amount
Braf	10090.ENSMUSP00000002487	Monarch MPO	MP:0001790	Abnormal immune system physiology
Braf	10090.ENSMUSP00000002487	Monarch MPO	MP:0001819	Abnormal immune cell physiology
Braf	10090.ENSMUSP00000002487	Monarch MPO	MP:0001845	Abnormal inflammatory response
Braf	10090.ENSMUSP00000002487	Monarch MPO	MP:0001846	Increased inflammatory response
Braf	10090.ENSMUSP00000002487	Monarch MPO	MP:0001914	Hemorrhage
Braf	10090.ENSMUSP00000002487	Monarch MPO	MP:0001944	Abnormal pancreas morphology
Braf	10090.ENSMUSP00000002487	Monarch MPO	MP:0002006	Neoplasm
Braf	10090.ENSMUSP00000002487	Monarch MPO	MP:0002014	Increased papilloma incidence
Braf	10090.ENSMUSP00000002487	Monarch MPO	MP:0002018	Increased malignant tumor incidence
Braf	10090.ENSMUSP00000002487	Monarch MPO	MP:0002019	Abnormal tumor incidence
Braf	10090.ENSMUSP00000002487	Monarch MPO	MP:0002020	Increased tumor incidence
Braf	10090.ENSMUSP00000002487	Monarch MPO	MP:0002038	Increased carcinoma incidence
Braf	10090.ENSMUSP00000002487	Monarch MPO	MP:0002048	Increased lung adenoma incidence
Braf	10090.ENSMUSP00000002487	Monarch MPO	MP:0002051	Increased skin papilloma incidence
Braf	10090.ENSMUSP00000002487	Monarch MPO	MP:0002058	Neonatal lethality
Braf	10090.ENSMUSP00000002487	Monarch MPO	MP:0002060	Abnormal skin morphology
Braf	10090.ENSMUSP00000002487	Monarch MPO	MP:0002061	Abnormal aggression-related behavior
Braf	10090.ENSMUSP00000002487	Monarch MPO	MP:0002062	Abnormal associative learning
Braf	10090.ENSMUSP00000002487	Monarch MPO	MP:0002063	Abnormal learning/memory/conditioning
Braf	10090.ENSMUSP00000002487	Monarch MPO	MP:0002064	Seizures
Braf	10090.ENSMUSP00000002487	Monarch MPO	MP:0002066	Abnormal motor capabilities/coordination/movement
Braf	10090.ENSMUSP00000002487	Monarch MPO	MP:0002069	Abnormal consumption behavior
Braf	10090.ENSMUSP00000002487	Monarch MPO	MP:0002080	Prenatal lethality
Braf	10090.ENSMUSP00000002487	Monarch MPO	MP:0002081	Perinatal lethality
Braf	10090.ENSMUSP00000002487	Monarch MPO	MP:0002082	Postnatal lethality
Braf	10090.ENSMUSP00000002487	Monarch MPO	MP:0002083	Premature death
Braf	10090.ENSMUSP00000002487	Monarch MPO	MP:0002086	Abnormal extraembryonic tissue morphology
Braf	10090.ENSMUSP00000002487	Monarch MPO	MP:0002088	Abnormal embryonic growth/weight/body size
Braf	10090.ENSMUSP00000002487	Monarch MPO	MP:0002089	Abnormal postnatal growth/weight/body size
Braf	10090.ENSMUSP00000002487	Monarch MPO	MP:0002095	Abnormal skin pigmentation
Braf	10090.ENSMUSP00000002487	Monarch MPO	MP:0002100	Abnormal tooth morphology
Braf	10090.ENSMUSP00000002487	Monarch MPO	MP:0002106	Abnormal muscle physiology
Braf	10090.ENSMUSP00000002487	Monarch MPO	MP:0002108	Abnormal muscle morphology
Braf	10090.ENSMUSP00000002487	Monarch MPO	MP:0002114	Abnormal axial skeleton morphology
Braf	10090.ENSMUSP00000002487	Monarch MPO	MP:0002116	Abnormal craniofacial bone morphology
Braf	10090.ENSMUSP00000002487	Monarch MPO	MP:0002127	Abnormal cardiovascular system morphology
Braf	10090.ENSMUSP00000002487	Monarch MPO	MP:0002128	Abnormal blood circulation
Braf	10090.ENSMUSP00000002487	Monarch MPO	MP:0002132	Abnormal respiratory system morphology
Braf	10090.ENSMUSP00000002487	Monarch MPO	MP:0002133	Abnormal respiratory system physiology
Braf	10090.ENSMUSP00000002487	Monarch MPO	MP:0002135	Abnormal kidney morphology
Braf	10090.ENSMUSP00000002487	Monarch MPO	MP:0002138	Abnormal hepatobiliary system morphology
Braf	10090.ENSMUSP00000002487	Monarch MPO	MP:0002152	Abnormal brain morphology
Braf	10090.ENSMUSP00000002487	Monarch MPO	MP:0002160	Abnormal reproductive system morphology
Braf	10090.ENSMUSP00000002487	Monarch MPO	MP:0002163	Abnormal gland morphology
Braf	10090.ENSMUSP00000002487	Monarch MPO	MP:0002164	Abnormal gland physiology
Braf	10090.ENSMUSP00000002487	Monarch MPO	MP:0002166	Abnormal tumor susceptibility
Braf	10090.ENSMUSP00000002487	Monarch MPO	MP:0002169	No abnormal phenotype detected
Braf	10090.ENSMUSP00000002487	Monarch MPO	MP:0002175	Decreased brain weight
Braf	10090.ENSMUSP00000002487	Monarch MPO	MP:0002182	Abnormal astrocyte morphology
Braf	10090.ENSMUSP00000002487	Monarch MPO	MP:0002184	Abnormal innervation
Braf	10090.ENSMUSP00000002487	Monarch MPO	MP:0002191	Abnormal artery morphology
Braf	10090.ENSMUSP00000002487	Monarch MPO	MP:0002206	Abnormal cns synaptic transmission
Braf	10090.ENSMUSP00000002487	Monarch MPO	MP:0002207	Abnormal long term potentiation
Braf	10090.ENSMUSP00000002487	Monarch MPO	MP:0002220	Large lymphoid organs
Braf	10090.ENSMUSP00000002487	Monarch MPO	MP:0002221	Abnormal lymph organ size
Braf	10090.ENSMUSP00000002487	Monarch MPO	MP:0002224	Abnormal spleen size
Braf	10090.ENSMUSP00000002487	Monarch MPO	MP:0002295	Abnormal pulmonary circulation
Braf	10090.ENSMUSP00000002487	Monarch MPO	MP:0002339	Abnormal lymph node morphology
Braf	10090.ENSMUSP00000002487	Monarch MPO	MP:0002364	Abnormal thymus size
Braf	10090.ENSMUSP00000002487	Monarch MPO	MP:0002396	Abnormal hematopoietic system morphology/development
Braf	10090.ENSMUSP00000002487	Monarch MPO	MP:0002398	Abnormal bone marrow cell morphology/development
Braf	10090.ENSMUSP00000002487	Monarch MPO	MP:0002404	Increased intestinal adenoma incidence
Braf	10090.ENSMUSP00000002487	Monarch MPO	MP:0002420	Abnormal adaptive immunity
Braf	10090.ENSMUSP00000002487	Monarch MPO	MP:0002421	Abnormal cell-mediated immunity
Braf	10090.ENSMUSP00000002487	Monarch MPO	MP:0002442	Abnormal leukocyte physiology
Braf	10090.ENSMUSP00000002487	Monarch MPO	MP:0002444	Abnormal t cell physiology
Braf	10090.ENSMUSP00000002487	Monarch MPO	MP:0002447	Abnormal erythrocyte morphology
Braf	10090.ENSMUSP00000002487	Monarch MPO	MP:0002450	Abnormal lymph organ development
Braf	10090.ENSMUSP00000002487	Monarch MPO	MP:0002499	Chronic inflammation
Braf	10090.ENSMUSP00000002487	Monarch MPO	MP:0002500	Granulomatous inflammation
Braf	10090.ENSMUSP00000002487	Monarch MPO	MP:0002557	Abnormal social/conspecific interaction behavior
Braf	10090.ENSMUSP00000002487	Monarch MPO	MP:0002566	Abnormal sexual interaction
Braf	10090.ENSMUSP00000002487	Monarch MPO	MP:0002572	Abnormal emotion/affect behavior
Braf	10090.ENSMUSP00000002487	Monarch MPO	MP:0002619	Abnormal lymphocyte morphology
Braf	10090.ENSMUSP00000002487	Monarch MPO	MP:0002624	Abnormal tricuspid valve morphology
Braf	10090.ENSMUSP00000002487	Monarch MPO	MP:0002722	Abnormal immune system organ morphology
Braf	10090.ENSMUSP00000002487	Monarch MPO	MP:0002723	Abnormal immune serum protein physiology
Braf	10090.ENSMUSP00000002487	Monarch MPO	MP:0002725	Abnormal vein morphology
Braf	10090.ENSMUSP00000002487	Monarch MPO	MP:0002745	Abnormal atrioventricular valve morphology
Braf	10090.ENSMUSP00000002487	Monarch MPO	MP:0002746	Abnormal semilunar valve morphology
Braf	10090.ENSMUSP00000002487	Monarch MPO	MP:0002748	Abnormal pulmonary valve morphology
Braf	10090.ENSMUSP00000002487	Monarch MPO	MP:0002752	Abnormal somatic nervous system morphology
Braf	10090.ENSMUSP00000002487	Monarch MPO	MP:0002757	Decreased vertical activity
Braf	10090.ENSMUSP00000002487	Monarch MPO	MP:0002801	Abnormal long term object recognition memory
Braf	10090.ENSMUSP00000002487	Monarch MPO	MP:0002833	Increased heart weight
Braf	10090.ENSMUSP00000002487	Monarch MPO	MP:0002873	Normal phenotype
Braf	10090.ENSMUSP00000002487	Monarch MPO	MP:0002875	Decreased erythrocyte cell number
Braf	10090.ENSMUSP00000002487	Monarch MPO	MP:0002877	Abnormal melanocyte morphology
Braf	10090.ENSMUSP00000002487	Monarch MPO	MP:0002882	Abnormal neuron morphology
Braf	10090.ENSMUSP00000002487	Monarch MPO	MP:0002925	Abnormal cardiovascular development
Braf	10090.ENSMUSP00000002487	Monarch MPO	MP:0002953	Thick ventricular wall
Braf	10090.ENSMUSP00000002487	Monarch MPO	MP:0002970	Abnormal white adipose tissue morphology
Braf	10090.ENSMUSP00000002487	Monarch MPO	MP:0002972	Abnormal cardiac muscle contractility
Braf	10090.ENSMUSP00000002487	Monarch MPO	MP:0003009	Abnormal cytokine secretion
Braf	10090.ENSMUSP00000002487	Monarch MPO	MP:0003057	Abnormal epicardium morphology
Braf	10090.ENSMUSP00000002487	Monarch MPO	MP:0003075	Abnormal response to cns ischemic injury
Braf	10090.ENSMUSP00000002487	Monarch MPO	MP:0003076	Increased susceptibility to ischemic brain injury
Braf	10090.ENSMUSP00000002487	Monarch MPO	MP:0003202	Abnormal neuron apoptosis
Braf	10090.ENSMUSP00000002487	Monarch MPO	MP:0003203	Increased neuron apoptosis
Braf	10090.ENSMUSP00000002487	Monarch MPO	MP:0003229	Abnormal vitelline vasculature morphology
Braf	10090.ENSMUSP00000002487	Monarch MPO	MP:0003231	Abnormal placenta vasculature
Braf	10090.ENSMUSP00000002487	Monarch MPO	MP:0003232	Abnormal forebrain development
Braf	10090.ENSMUSP00000002487	Monarch MPO	MP:0003351	Decreased circulating levels of thyroid hormone
Braf	10090.ENSMUSP00000002487	Monarch MPO	MP:0003402	Decreased liver weight
Braf	10090.ENSMUSP00000002487	Monarch MPO	MP:0003411	Abnormal vein development
Braf	10090.ENSMUSP00000002487	Monarch MPO	MP:0003491	Abnormal voluntary movement
Braf	10090.ENSMUSP00000002487	Monarch MPO	MP:0003631	Nervous system phenotype
Braf	10090.ENSMUSP00000002487	Monarch MPO	MP:0003632	Abnormal nervous system morphology
Braf	10090.ENSMUSP00000002487	Monarch MPO	MP:0003633	Abnormal nervous system physiology
Braf	10090.ENSMUSP00000002487	Monarch MPO	MP:0003634	Abnormal glial cell morphology
Braf	10090.ENSMUSP00000002487	Monarch MPO	MP:0003635	Abnormal synaptic transmission
Braf	10090.ENSMUSP00000002487	Monarch MPO	MP:0003644	Thymus atrophy
Braf	10090.ENSMUSP00000002487	Monarch MPO	MP:0003743	Abnormal facial morphology
Braf	10090.ENSMUSP00000002487	Monarch MPO	MP:0003762	Abnormal immune organ physiology
Braf	10090.ENSMUSP00000002487	Monarch MPO	MP:0003763	Abnormal thymus physiology
Braf	10090.ENSMUSP00000002487	Monarch MPO	MP:0003861	Abnormal nervous system development
Braf	10090.ENSMUSP00000002487	Monarch MPO	MP:0003920	Abnormal heart right ventricle morphology
Braf	10090.ENSMUSP00000002487	Monarch MPO	MP:0003945	Abnormal lymphocyte physiology
Braf	10090.ENSMUSP00000002487	Monarch MPO	MP:0003953	Abnormal hormone level
Braf	10090.ENSMUSP00000002487	Monarch MPO	MP:0003956	Abnormal body size
Braf	10090.ENSMUSP00000002487	Monarch MPO	MP:0003964	Abnormal noradrenaline level
Braf	10090.ENSMUSP00000002487	Monarch MPO	MP:0003965	Abnormal pituitary hormone level
Braf	10090.ENSMUSP00000002487	Monarch MPO	MP:0003968	Abnormal growth hormone level
Braf	10090.ENSMUSP00000002487	Monarch MPO	MP:0003971	Abnormal thyroid-stimulating hormone level
Braf	10090.ENSMUSP00000002487	Monarch MPO	MP:0003973	Increased pituitary hormone level
Braf	10090.ENSMUSP00000002487	Monarch MPO	MP:0003984	Embryonic growth retardation
Braf	10090.ENSMUSP00000002487	Monarch MPO	MP:0004056	Abnormal myocardium compact layer morphology
Braf	10090.ENSMUSP00000002487	Monarch MPO	MP:0004057	Thin myocardium compact layer
Braf	10090.ENSMUSP00000002487	Monarch MPO	MP:0004087	Abnormal muscle fiber morphology
Braf	10090.ENSMUSP00000002487	Monarch MPO	MP:0004097	Abnormal cerebellar cortex morphology
Braf	10090.ENSMUSP00000002487	Monarch MPO	MP:0004111	Abnormal coronary artery morphology
Braf	10090.ENSMUSP00000002487	Monarch MPO	MP:0004163	Abnormal adenohypophysis morphology
Braf	10090.ENSMUSP00000002487	Monarch MPO	MP:0004166	Abnormal limbic system morphology
Braf	10090.ENSMUSP00000002487	Monarch MPO	MP:0004196	Abnormal prenatal growth/weight/body size
Braf	10090.ENSMUSP00000002487	Monarch MPO	MP:0004255	Abnormal spongiotrophoblast layer morphology
Braf	10090.ENSMUSP00000002487	Monarch MPO	MP:0004564	Enlarged myocardial fiber
Braf	10090.ENSMUSP00000002487	Monarch MPO	MP:0004592	Small mandible
Braf	10090.ENSMUSP00000002487	Monarch MPO	MP:0004696	Abnormal thyroid follicle morphology
Braf	10090.ENSMUSP00000002487	Monarch MPO	MP:0004783	Abnormal cardinal vein morphology
Braf	10090.ENSMUSP00000002487	Monarch MPO	MP:0004811	Abnormal neuron physiology
Braf	10090.ENSMUSP00000002487	Monarch MPO	MP:0004831	Long incisors
Braf	10090.ENSMUSP00000002487	Monarch MPO	MP:0004842	Abnormal large intestine crypts of lieberkuhn morphology
Braf	10090.ENSMUSP00000002487	Monarch MPO	MP:0004847	Abnormal liver weight
Braf	10090.ENSMUSP00000002487	Monarch MPO	MP:0004848	Abnormal liver size
Braf	10090.ENSMUSP00000002487	Monarch MPO	MP:0004857	Abnormal heart weight
Braf	10090.ENSMUSP00000002487	Monarch MPO	MP:0004924	Abnormal behavior
Braf	10090.ENSMUSP00000002487	Monarch MPO	MP:0004948	Abnormal neuronal precursor proliferation
Braf	10090.ENSMUSP00000002487	Monarch MPO	MP:0004951	Abnormal spleen weight
Braf	10090.ENSMUSP00000002487	Monarch MPO	MP:0004952	Increased spleen weight
Braf	10090.ENSMUSP00000002487	Monarch MPO	MP:0004953	Decreased spleen weight
Braf	10090.ENSMUSP00000002487	Monarch MPO	MP:0004954	Abnormal thymus weight
Braf	10090.ENSMUSP00000002487	Monarch MPO	MP:0004956	Decreased thymus weight
Braf	10090.ENSMUSP00000002487	Monarch MPO	MP:0005016	Decreased lymphocyte cell number
Braf	10090.ENSMUSP00000002487	Monarch MPO	MP:0005018	Decreased t cell number
Braf	10090.ENSMUSP00000002487	Monarch MPO	MP:0005031	Abnormal trophoblast layer morphology
Braf	10090.ENSMUSP00000002487	Monarch MPO	MP:0005076	Abnormal cell differentiation
Braf	10090.ENSMUSP00000002487	Monarch MPO	MP:0005116	Abnormal circulating pituitary hormone level
Braf	10090.ENSMUSP00000002487	Monarch MPO	MP:0005117	Increased circulating pituitary hormone level
Braf	10090.ENSMUSP00000002487	Monarch MPO	MP:0005122	Increased circulating thyroid-stimulating hormone level
Braf	10090.ENSMUSP00000002487	Monarch MPO	MP:0005135	Increased thyroid-stimulating hormone level
Braf	10090.ENSMUSP00000002487	Monarch MPO	MP:0005164	Abnormal response to injury
Braf	10090.ENSMUSP00000002487	Monarch MPO	MP:0005165	Increased susceptibility to injury
Braf	10090.ENSMUSP00000002487	Monarch MPO	MP:0005220	Abnormal exocrine pancreas morphology
Braf	10090.ENSMUSP00000002487	Monarch MPO	MP:0005274	Abnormal viscerocranium morphology
Braf	10090.ENSMUSP00000002487	Monarch MPO	MP:0005294	Abnormal heart ventricle morphology
Braf	10090.ENSMUSP00000002487	Monarch MPO	MP:0005329	Abnormal myocardium layer morphology
Braf	10090.ENSMUSP00000002487	Monarch MPO	MP:0005358	Abnormal incisor morphology
Braf	10090.ENSMUSP00000002487	Monarch MPO	MP:0005367	Renal/urinary system phenotype
Braf	10090.ENSMUSP00000002487	Monarch MPO	MP:0005369	Muscle phenotype
Braf	10090.ENSMUSP00000002487	Monarch MPO	MP:0005370	Liver/biliary system phenotype
Braf	10090.ENSMUSP00000002487	Monarch MPO	MP:0005375	Adipose tissue phenotype
Braf	10090.ENSMUSP00000002487	Monarch MPO	MP:0005376	Homeostasis/metabolism phenotype
Braf	10090.ENSMUSP00000002487	Monarch MPO	MP:0005378	Growth/size/body region phenotype
Braf	10090.ENSMUSP00000002487	Monarch MPO	MP:0005379	Endocrine/exocrine gland phenotype
Braf	10090.ENSMUSP00000002487	Monarch MPO	MP:0005380	Embryo phenotype
Braf	10090.ENSMUSP00000002487	Monarch MPO	MP:0005381	Digestive/alimentary phenotype
Braf	10090.ENSMUSP00000002487	Monarch MPO	MP:0005382	Craniofacial phenotype
Braf	10090.ENSMUSP00000002487	Monarch MPO	MP:0005384	Cellular phenotype
Braf	10090.ENSMUSP00000002487	Monarch MPO	MP:0005385	Cardiovascular system phenotype
Braf	10090.ENSMUSP00000002487	Monarch MPO	MP:0005386	Behavior/neurological phenotype
Braf	10090.ENSMUSP00000002487	Monarch MPO	MP:0005387	Immune system phenotype
Braf	10090.ENSMUSP00000002487	Monarch MPO	MP:0005388	Respiratory system phenotype
Braf	10090.ENSMUSP00000002487	Monarch MPO	MP:0005389	Reproductive system phenotype
Braf	10090.ENSMUSP00000002487	Monarch MPO	MP:0005390	Skeleton phenotype
Braf	10090.ENSMUSP00000002487	Monarch MPO	MP:0005397	Hematopoietic system phenotype
Braf	10090.ENSMUSP00000002487	Monarch MPO	MP:0005406	Abnormal heart size
Braf	10090.ENSMUSP00000002487	Monarch MPO	MP:0005418	Abnormal circulating hormone level
Braf	10090.ENSMUSP00000002487	Monarch MPO	MP:0005449	Abnormal food intake
Braf	10090.ENSMUSP00000002487	Monarch MPO	MP:0005451	Abnormal body composition
Braf	10090.ENSMUSP00000002487	Monarch MPO	MP:0005452	Abnormal adipose tissue amount
Braf	10090.ENSMUSP00000002487	Monarch MPO	MP:0005461	Abnormal dendritic cell morphology
Braf	10090.ENSMUSP00000002487	Monarch MPO	MP:0005468	Abnormal thyroid hormone level
Braf	10090.ENSMUSP00000002487	Monarch MPO	MP:0005469	Abnormal thyroxine level
Braf	10090.ENSMUSP00000002487	Monarch MPO	MP:0005471	Decreased thyroxine level
Braf	10090.ENSMUSP00000002487	Monarch MPO	MP:0005475	Abnormal circulating thyroxine level
Braf	10090.ENSMUSP00000002487	Monarch MPO	MP:0005478	Decreased circulating thyroxine level
Braf	10090.ENSMUSP00000002487	Monarch MPO	MP:0005508	Abnormal skeleton morphology
Braf	10090.ENSMUSP00000002487	Monarch MPO	MP:0005599	Increased cardiac muscle contractility
Braf	10090.ENSMUSP00000002487	Monarch MPO	MP:0005620	Abnormal muscle contractility
Braf	10090.ENSMUSP00000002487	Monarch MPO	MP:0005621	Abnormal cell physiology
Braf	10090.ENSMUSP00000002487	Monarch MPO	MP:0005655	Increased aggression
Braf	10090.ENSMUSP00000002487	Monarch MPO	MP:0005663	Abnormal circulating noradrenaline level
Braf	10090.ENSMUSP00000002487	Monarch MPO	MP:0005665	Increased circulating noradrenaline level
Braf	10090.ENSMUSP00000002487	Monarch MPO	MP:0006042	Increased apoptosis
Braf	10090.ENSMUSP00000002487	Monarch MPO	MP:0006055	Abnormal vascular endothelial cell morphology
Braf	10090.ENSMUSP00000002487	Monarch MPO	MP:0006056	Increased vascular endothelial cell number
Braf	10090.ENSMUSP00000002487	Monarch MPO	MP:0006107	Abnormal fetal atrioventricular canal morphology
Braf	10090.ENSMUSP00000002487	Monarch MPO	MP:0006113	Abnormal heart septum morphology
Braf	10090.ENSMUSP00000002487	Monarch MPO	MP:0006205	Embryonic lethality between implantation and somite formation
Braf	10090.ENSMUSP00000002487	Monarch MPO	MP:0006207	Embryonic lethality during organogenesis
Braf	10090.ENSMUSP00000002487	Monarch MPO	MP:0006208	Lethality throughout fetal growth and development
Braf	10090.ENSMUSP00000002487	Monarch MPO	MP:0006254	Thin cerebral cortex
Braf	10090.ENSMUSP00000002487	Monarch MPO	MP:0006387	Abnormal t cell number
Braf	10090.ENSMUSP00000002487	Monarch MPO	MP:0006412	Abnormal t cell apoptosis
Braf	10090.ENSMUSP00000002487	Monarch MPO	MP:0006413	Increased t cell apoptosis
Braf	10090.ENSMUSP00000002487	Monarch MPO	MP:0008014	Increased lung tumor incidence
Braf	10090.ENSMUSP00000002487	Monarch MPO	MP:0008037	Abnormal t cell morphology
Braf	10090.ENSMUSP00000002487	Monarch MPO	MP:0008108	Abnormal small intestinal villus morphology
Braf	10090.ENSMUSP00000002487	Monarch MPO	MP:0008125	Abnormal dendritic cell number
Braf	10090.ENSMUSP00000002487	Monarch MPO	MP:0008126	Increased dendritic cell number
Braf	10090.ENSMUSP00000002487	Monarch MPO	MP:0008143	Abnormal dendrite morphology
Braf	10090.ENSMUSP00000002487	Monarch MPO	MP:0008195	Abnormal professional antigen presenting cell morphology
Braf	10090.ENSMUSP00000002487	Monarch MPO	MP:0008246	Abnormal leukocyte morphology
Braf	10090.ENSMUSP00000002487	Monarch MPO	MP:0008247	Abnormal mononuclear cell morphology
Braf	10090.ENSMUSP00000002487	Monarch MPO	MP:0008256	Abnormal myometrium morphology
Braf	10090.ENSMUSP00000002487	Monarch MPO	MP:0008285	Abnormal hippocampus granule cell layer
Braf	10090.ENSMUSP00000002487	Monarch MPO	MP:0008321	Small adenohypophysis
Braf	10090.ENSMUSP00000002487	Monarch MPO	MP:0008415	Abnormal neurite morphology
Braf	10090.ENSMUSP00000002487	Monarch MPO	MP:0008489	Slow postnatal weight gain
Braf	10090.ENSMUSP00000002487	Monarch MPO	MP:0008540	Abnormal cerebral hemisphere morphology
Braf	10090.ENSMUSP00000002487	Monarch MPO	MP:0008569	Lethality at weaning
Braf	10090.ENSMUSP00000002487	Monarch MPO	MP:0008572	Abnormal purkinje cell dendrite morphology
Braf	10090.ENSMUSP00000002487	Monarch MPO	MP:0008737	Abnormal spleen physiology
Braf	10090.ENSMUSP00000002487	Monarch MPO	MP:0008762	Embryonic lethality
Braf	10090.ENSMUSP00000002487	Monarch MPO	MP:0008803	Abnormal placental labyrinth vasculature morphology
Braf	10090.ENSMUSP00000002487	Monarch MPO	MP:0008817	Hematoma
Braf	10090.ENSMUSP00000002487	Monarch MPO	MP:0008946	Abnormal neuron number
Braf	10090.ENSMUSP00000002487	Monarch MPO	MP:0008948	Decreased neuron number
Braf	10090.ENSMUSP00000002487	Monarch MPO	MP:0008957	Abnormal placenta junctional zone morphology
Braf	10090.ENSMUSP00000002487	Monarch MPO	MP:0009145	Abnormal pancreatic acinus morphology
Braf	10090.ENSMUSP00000002487	Monarch MPO	MP:0009146	Abnormal pancreatic acinar cell morphology
Braf	10090.ENSMUSP00000002487	Monarch MPO	MP:0009208	Abnormal female genitalia morphology
Braf	10090.ENSMUSP00000002487	Monarch MPO	MP:0009209	Abnormal internal female genitalia morphology
Braf	10090.ENSMUSP00000002487	Monarch MPO	MP:0009258	Abnormal thymocyte apoptosis
Braf	10090.ENSMUSP00000002487	Monarch MPO	MP:0009322	Increased splenocyte apoptosis
Braf	10090.ENSMUSP00000002487	Monarch MPO	MP:0009333	Abnormal splenocyte physiology
Braf	10090.ENSMUSP00000002487	Monarch MPO	MP:0009340	Abnormal splenocyte apoptosis
Braf	10090.ENSMUSP00000002487	Monarch MPO	MP:0009385	Abnormal dermal pigmentation
Braf	10090.ENSMUSP00000002487	Monarch MPO	MP:0009386	Abnormal dermal melanocyte morphology
Braf	10090.ENSMUSP00000002487	Monarch MPO	MP:0009429	Decreased embryo weight
Braf	10090.ENSMUSP00000002487	Monarch MPO	MP:0009454	Impaired contextual conditioning behavior
Braf	10090.ENSMUSP00000002487	Monarch MPO	MP:0009489	Abnormal blood vessel endothelium morphology
Braf	10090.ENSMUSP00000002487	Monarch MPO	MP:0009535	Abnormal skin sebaceous gland morphology
Braf	10090.ENSMUSP00000002487	Monarch MPO	MP:0009541	Increased thymocyte apoptosis
Braf	10090.ENSMUSP00000002487	Monarch MPO	MP:0009642	Abnormal blood homeostasis
Braf	10090.ENSMUSP00000002487	Monarch MPO	MP:0009672	Abnormal birth weight
Braf	10090.ENSMUSP00000002487	Monarch MPO	MP:0009674	Decreased birth weight
Braf	10090.ENSMUSP00000002487	Monarch MPO	MP:0009701	Abnormal birth body size
Braf	10090.ENSMUSP00000002487	Monarch MPO	MP:0009703	Decreased birth body size
Braf	10090.ENSMUSP00000002487	Monarch MPO	MP:0009745	Abnormal behavioral response to xenobiotic
Braf	10090.ENSMUSP00000002487	Monarch MPO	MP:0009746	Enhanced behavioral response to xenobiotic
Braf	10090.ENSMUSP00000002487	Monarch MPO	MP:0009850	Embryonic lethality between implantation and placentation
Braf	10090.ENSMUSP00000002487	Monarch MPO	MP:0009931	Abnormal skin appearance
Braf	10090.ENSMUSP00000002487	Monarch MPO	MP:0009937	Abnormal neuron differentiation
Braf	10090.ENSMUSP00000002487	Monarch MPO	MP:0009956	Abnormal cerebellar layer morphology
Braf	10090.ENSMUSP00000002487	Monarch MPO	MP:0009957	Abnormal cerebellum vermis lobule morphology
Braf	10090.ENSMUSP00000002487	Monarch MPO	MP:0009960	Abnormal cerebellum anterior lobe morphology
Braf	10090.ENSMUSP00000002487	Monarch MPO	MP:0009961	Abnormal flocculonodular lobe morphology
Braf	10090.ENSMUSP00000002487	Monarch MPO	MP:0009962	Abnormal cerebellum posterior lobe morphology
Braf	10090.ENSMUSP00000002487	Monarch MPO	MP:0009964	Abnormal cerebellum lobule morphology
Braf	10090.ENSMUSP00000002487	Monarch MPO	MP:0009967	Abnormal neuron proliferation
Braf	10090.ENSMUSP00000002487	Monarch MPO	MP:0009969	Abnormal cerebral cortex pyramidal cell morphology
Braf	10090.ENSMUSP00000002487	Monarch MPO	MP:0009988	Abnormal cerebellum vermis lobule i morphology
Braf	10090.ENSMUSP00000002487	Monarch MPO	MP:0009989	Abnormal cerebellum vermis lobule ii morphology
Braf	10090.ENSMUSP00000002487	Monarch MPO	MP:0009990	Abnormal cerebellum vermis lobule iii morphology
Braf	10090.ENSMUSP00000002487	Monarch MPO	MP:0009993	Abnormal cerebellum vermis lobule v morphology
Braf	10090.ENSMUSP00000002487	Monarch MPO	MP:0009995	Abnormal cerebellum vermis lobule vii morphology
Braf	10090.ENSMUSP00000002487	Monarch MPO	MP:0009997	Abnormal cerebellum vermis lobule x morphology
Braf	10090.ENSMUSP00000002487	Monarch MPO	MP:0010029	Abnormal basicranium morphology
Braf	10090.ENSMUSP00000002487	Monarch MPO	MP:0010031	Abnormal cranium size
Braf	10090.ENSMUSP00000002487	Monarch MPO	MP:0010224	Abnormal heart ventricle outflow tract morphology
Braf	10090.ENSMUSP00000002487	Monarch MPO	MP:0010273	Increased classified tumor incidence
Braf	10090.ENSMUSP00000002487	Monarch MPO	MP:0010274	Increased organ/body region tumor incidence
Braf	10090.ENSMUSP00000002487	Monarch MPO	MP:0010275	Increased melanoma incidence
Braf	10090.ENSMUSP00000002487	Monarch MPO	MP:0010279	Increased gastrointestinal tumor incidence
Braf	10090.ENSMUSP00000002487	Monarch MPO	MP:0010288	Increased gland tumor incidence
Braf	10090.ENSMUSP00000002487	Monarch MPO	MP:0010292	Increased alimentary system tumor incidence
Braf	10090.ENSMUSP00000002487	Monarch MPO	MP:0010293	Increased integument system tumor incidence
Braf	10090.ENSMUSP00000002487	Monarch MPO	MP:0010298	Increased respiratory system tumor incidence
Braf	10090.ENSMUSP00000002487	Monarch MPO	MP:0010300	Increased skin tumor incidence
Braf	10090.ENSMUSP00000002487	Monarch MPO	MP:0010316	Increased thyroid tumor incidence
Braf	10090.ENSMUSP00000002487	Monarch MPO	MP:0010346	Increased thyroid carcinoma incidence
Braf	10090.ENSMUSP00000002487	Monarch MPO	MP:0010383	Increased adenoma incidence
Braf	10090.ENSMUSP00000002487	Monarch MPO	MP:0010428	Abnormal heart right ventricle outflow tract morphology
Braf	10090.ENSMUSP00000002487	Monarch MPO	MP:0010435	Abnormal heart atrium and ventricle connection
Braf	10090.ENSMUSP00000002487	Monarch MPO	MP:0010545	Abnormal heart layer morphology
Braf	10090.ENSMUSP00000002487	Monarch MPO	MP:0010551	Abnormal coronary vessel morphology
Braf	10090.ENSMUSP00000002487	Monarch MPO	MP:0010600	Enlarged pulmonary valve
Braf	10090.ENSMUSP00000002487	Monarch MPO	MP:0010601	Thick pulmonary valve
Braf	10090.ENSMUSP00000002487	Monarch MPO	MP:0010602	Abnormal pulmonary valve cusp morphology
Braf	10090.ENSMUSP00000002487	Monarch MPO	MP:0010605	Thick pulmonary valve cusps
Braf	10090.ENSMUSP00000002487	Monarch MPO	MP:0010614	Abnormal mitral valve cusp morphology
Braf	10090.ENSMUSP00000002487	Monarch MPO	MP:0010617	Thick mitral valve cusps
Braf	10090.ENSMUSP00000002487	Monarch MPO	MP:0010618	Enlarged mitral valve
Braf	10090.ENSMUSP00000002487	Monarch MPO	MP:0010620	Thick mitral valve
Braf	10090.ENSMUSP00000002487	Monarch MPO	MP:0010627	Enlarged tricuspid valve
Braf	10090.ENSMUSP00000002487	Monarch MPO	MP:0010629	Thick tricuspid valve
Braf	10090.ENSMUSP00000002487	Monarch MPO	MP:0010630	Abnormal cardiac muscle tissue morphology
Braf	10090.ENSMUSP00000002487	Monarch MPO	MP:0010639	Abnormal tumor pathology
Braf	10090.ENSMUSP00000002487	Monarch MPO	MP:0010678	Abnormal skin adnexa morphology
Braf	10090.ENSMUSP00000002487	Monarch MPO	MP:0010724	Thick interventricular septum
Braf	10090.ENSMUSP00000002487	Monarch MPO	MP:0010768	Mortality/aging
Braf	10090.ENSMUSP00000002487	Monarch MPO	MP:0010769	Abnormal survival
Braf	10090.ENSMUSP00000002487	Monarch MPO	MP:0010770	Preweaning lethality
Braf	10090.ENSMUSP00000002487	Monarch MPO	MP:0010771	Integument phenotype
Braf	10090.ENSMUSP00000002487	Monarch MPO	MP:0010832	Lethality during fetal growth through weaning
Braf	10090.ENSMUSP00000002487	Monarch MPO	MP:0010865	Prenatal growth retardation
Braf	10090.ENSMUSP00000002487	Monarch MPO	MP:0010866	Abnormal prenatal body size
Braf	10090.ENSMUSP00000002487	Monarch MPO	MP:0010909	Pulmonary alveolar hemorrhage
Braf	10090.ENSMUSP00000002487	Monarch MPO	MP:0010942	Abnormal respiratory epithelium morphology
Braf	10090.ENSMUSP00000002487	Monarch MPO	MP:0010945	Lung epithelium hyperplasia
Braf	10090.ENSMUSP00000002487	Monarch MPO	MP:0011083	Lethality at weaning, complete penetrance
Braf	10090.ENSMUSP00000002487	Monarch MPO	MP:0011084	Lethality at weaning, incomplete penetrance
Braf	10090.ENSMUSP00000002487	Monarch MPO	MP:0011085	Postnatal lethality, complete penetrance
Braf	10090.ENSMUSP00000002487	Monarch MPO	MP:0011086	Postnatal lethality, incomplete penetrance
Braf	10090.ENSMUSP00000002487	Monarch MPO	MP:0011087	Neonatal lethality, complete penetrance
Braf	10090.ENSMUSP00000002487	Monarch MPO	MP:0011096	Embryonic lethality between implantation and somite formation, complete penetrance
Braf	10090.ENSMUSP00000002487	Monarch MPO	MP:0011098	Embryonic lethality during organogenesis, complete penetrance
Braf	10090.ENSMUSP00000002487	Monarch MPO	MP:0011108	Embryonic lethality during organogenesis, incomplete penetrance
Braf	10090.ENSMUSP00000002487	Monarch MPO	MP:0011109	Lethality throughout fetal growth and development, incomplete penetrance
Braf	10090.ENSMUSP00000002487	Monarch MPO	MP:0011180	Abnormal hematopoietic cell number
Braf	10090.ENSMUSP00000002487	Monarch MPO	MP:0011181	Increased hematopoietic cell number
Braf	10090.ENSMUSP00000002487	Monarch MPO	MP:0011182	Decreased hematopoietic cell number
Braf	10090.ENSMUSP00000002487	Monarch MPO	MP:0011239	Abnormal skin coloration
Braf	10090.ENSMUSP00000002487	Monarch MPO	MP:0011479	Abnormal catecholamine level
Braf	10090.ENSMUSP00000002487	Monarch MPO	MP:0011495	Abnormal head shape
Braf	10090.ENSMUSP00000002487	Monarch MPO	MP:0011648	Thick heart valve cusps
Braf	10090.ENSMUSP00000002487	Monarch MPO	MP:0011655	Abnormal systemic artery morphology
Braf	10090.ENSMUSP00000002487	Monarch MPO	MP:0011702	Abnormal fibroblast proliferation
Braf	10090.ENSMUSP00000002487	Monarch MPO	MP:0011703	Increased fibroblast proliferation
Braf	10090.ENSMUSP00000002487	Monarch MPO	MP:0011827	Impaired neuron differentiation
Braf	10090.ENSMUSP00000002487	Monarch MPO	MP:0011862	Decreased cranium length
Braf	10090.ENSMUSP00000002487	Monarch MPO	MP:0011940	Decreased food intake
Braf	10090.ENSMUSP00000002487	Monarch MPO	MP:0012317	Impaired conditioning behavior
Braf	10090.ENSMUSP00000002487	Monarch MPO	MP:0012321	Abnormal total tissue mass
Braf	10090.ENSMUSP00000002487	Monarch MPO	MP:0012322	Decreased total tissue mass
Braf	10090.ENSMUSP00000002487	Monarch MPO	MP:0012382	Abnormal blood cell physiology
Braf	10090.ENSMUSP00000002487	Monarch MPO	MP:0012401	Long nails
Braf	10090.ENSMUSP00000002487	Monarch MPO	MP:0012556	Increased cell death
Braf	10090.ENSMUSP00000002487	Monarch MPO	MP:0012575	Increased noradrenaline level
Braf	10090.ENSMUSP00000002487	Monarch MPO	MP:0012775	Abnormal brain weight
Braf	10090.ENSMUSP00000002487	Monarch MPO	MP:0013152	Abnormal organ/body region tumor incidence
Braf	10090.ENSMUSP00000002487	Monarch MPO	MP:0013292	Embryonic lethality prior to organogenesis
Braf	10090.ENSMUSP00000002487	Monarch MPO	MP:0013293	Embryonic lethality prior to tooth bud stage
Braf	10090.ENSMUSP00000002487	Monarch MPO	MP:0013328	Visceromegaly
Braf	10090.ENSMUSP00000002487	Monarch MPO	MP:0013543	Abnormal holocrine gland morphology
Braf	10090.ENSMUSP00000002487	Monarch MPO	MP:0013558	Abnormal exocrine gland morphology
Braf	10090.ENSMUSP00000002487	Monarch MPO	MP:0013560	Abnormal endocrine gland morphology
Braf	10090.ENSMUSP00000002487	Monarch MPO	MP:0013561	Abnormal endocrine gland physiology
Braf	10090.ENSMUSP00000002487	Monarch MPO	MP:0013656	Abnormal hematopoietic cell morphology
Braf	10090.ENSMUSP00000002487	Monarch MPO	MP:0013657	Abnormal blood cell morphology
Braf	10090.ENSMUSP00000002487	Monarch MPO	MP:0013658	Abnormal myeloid cell morphology
Braf	10090.ENSMUSP00000002487	Monarch MPO	MP:0013659	Abnormal erythroid lineage cell morphology
Braf	10090.ENSMUSP00000002487	Monarch MPO	MP:0013661	Abnormal myeloid cell number
Braf	10090.ENSMUSP00000002487	Monarch MPO	MP:0013662	Decreased myeloid cell number
Braf	10090.ENSMUSP00000002487	Monarch MPO	MP:0013954	Increased intestine length
Braf	10090.ENSMUSP00000002487	Monarch MPO	MP:0013957	Increased small intestine length
Braf	10090.ENSMUSP00000002487	Monarch MPO	MP:0013959	Increased large intestine length
Braf	10090.ENSMUSP00000002487	Monarch MPO	MP:0014081	Branched small intestinal villi
Braf	10090.ENSMUSP00000002487	Monarch MPO	MP:0014114	Abnormal cognition
Braf	10090.ENSMUSP00000002487	Monarch MPO	MP:0014134	Abnormal embryo morphology
Braf	10090.ENSMUSP00000002487	Monarch MPO	MP:0020135	Abnormal heart ventricle wall thickness
Braf	10090.ENSMUSP00000002487	Monarch MPO	MP:0020136	Abnormal interventricular septum thickness
Braf	10090.ENSMUSP00000002487	Monarch MPO	MP:0020167	Abnormal vertical activity
Braf	10090.ENSMUSP00000002487	Monarch MPO	MP:0020188	Abnormal classified tumor incidence
Braf	10090.ENSMUSP00000002487	Monarch MPO	MP:0020189	Abnormal adenoma incidence
Braf	10090.ENSMUSP00000002487	Monarch MPO	MP:0020190	Abnormal lung adenoma incidence
Braf	10090.ENSMUSP00000002487	Monarch MPO	MP:0020393	Increased neuronal precursor proliferation
Braf	10090.ENSMUSP00000002487	Monarch MPO	MP:0020414	Abnormal fibroblast physiology
Braf	10090.ENSMUSP00000002487	Monarch MPO	MP:0020981	Abnormal immune system development
Braf	10090.ENSMUSP00000002487	Monarch MPO	MP:0020999	Abnormal small intestine length
Braf	10090.ENSMUSP00000002487	Monarch MPO	MP:0021009	Abnormal synaptic physiology
Braf	10090.ENSMUSP00000002487	Monarch MPO	MP:0030091	Macrodontia
Braf	10090.ENSMUSP00000002487	Monarch MPO	MP:0030245	Round head
Braf	10090.ENSMUSP00000002487	Monarch MPO	MP:0030254	Abnormal dental arch morphology
Braf	10090.ENSMUSP00000002487	Monarch MPO	MP:0030386	Facial bone hypoplasia
Braf	10090.ENSMUSP00000002487	Monarch MPO	MP:0030572	Abnormal pilosebaceous unit morphology
Braf	10090.ENSMUSP00000002487	Monarch MPO	MP:0031066	Cytokine storm
Braf	10090.ENSMUSP00000002487	Monarch MPO	MP:0031094	Organomegaly
Braf	10090.ENSMUSP00000002487	Monarch MPO	MP:0031392	Hypoactivity
Braf	10090.ENSMUSP00000002487	UniProt Keywords	KW-0007	Acetylation
Braf	10090.ENSMUSP00000002487	UniProt Keywords	KW-0021	Allosteric enzyme
Braf	10090.ENSMUSP00000002487	UniProt Keywords	KW-0025	Alternative splicing
Braf	10090.ENSMUSP00000002487	UniProt Keywords	KW-0067	ATP-binding
Braf	10090.ENSMUSP00000002487	UniProt Keywords	KW-0160	Chromosomal rearrangement
Braf	10090.ENSMUSP00000002487	UniProt Keywords	KW-0418	Kinase
Braf	10090.ENSMUSP00000002487	UniProt Keywords	KW-0472	Membrane
Braf	10090.ENSMUSP00000002487	UniProt Keywords	KW-0479	Metal-binding
Braf	10090.ENSMUSP00000002487	UniProt Keywords	KW-0488	Methylation
Braf	10090.ENSMUSP00000002487	UniProt Keywords	KW-0539	Nucleus
Braf	10090.ENSMUSP00000002487	UniProt Keywords	KW-0547	Nucleotide-binding
Braf	10090.ENSMUSP00000002487	UniProt Keywords	KW-0597	Phosphoprotein
Braf	10090.ENSMUSP00000002487	UniProt Keywords	KW-0656	Proto-oncogene
Braf	10090.ENSMUSP00000002487	UniProt Keywords	KW-0723	Serine/threonine-protein kinase
Braf	10090.ENSMUSP00000002487	UniProt Keywords	KW-0808	Transferase
Braf	10090.ENSMUSP00000002487	UniProt Keywords	KW-0832	Ubl conjugation
Braf	10090.ENSMUSP00000002487	UniProt Keywords	KW-0862	Zinc
Braf	10090.ENSMUSP00000002487	UniProt Keywords	KW-0963	Cytoplasm
Braf	10090.ENSMUSP00000002487	UniProt Keywords	KW-1003	Cell membrane
Braf	10090.ENSMUSP00000002487	UniProt Keywords	KW-1017	Isopeptide bond
Braf	10090.ENSMUSP00000002487	UniProt Keywords	KW-9995	Disease
Braf	10090.ENSMUSP00000002487	Pfam	PF00069	Protein kinase domain
Braf	10090.ENSMUSP00000002487	Pfam	PF00130	Phorbol esters/diacylglycerol binding domain (C1 domain)
Braf	10090.ENSMUSP00000002487	Pfam	PF02196	Raf-like Ras-binding domain
Braf	10090.ENSMUSP00000002487	Pfam	PF07714	Protein tyrosine kinase
Braf	10090.ENSMUSP00000002487	Pfam	PF14531	Kinase-like
Braf	10090.ENSMUSP00000002487	InterPro	IPR000719	Protein kinase domain
Braf	10090.ENSMUSP00000002487	InterPro	IPR001245	Serine-threonine/tyrosine-protein kinase, catalytic domain
Braf	10090.ENSMUSP00000002487	InterPro	IPR002219	Protein kinase C-like, phorbol ester/diacylglycerol-binding domain
Braf	10090.ENSMUSP00000002487	InterPro	IPR003116	Raf-like Ras-binding
Braf	10090.ENSMUSP00000002487	InterPro	IPR008271	Serine/threonine-protein kinase, active site
Braf	10090.ENSMUSP00000002487	InterPro	IPR011009	Protein kinase-like domain superfamily
Braf	10090.ENSMUSP00000002487	InterPro	IPR017441	Protein kinase, ATP binding site
Braf	10090.ENSMUSP00000002487	InterPro	IPR020454	Diacylglycerol/phorbol-ester binding
Braf	10090.ENSMUSP00000002487	InterPro	IPR029071	Ubiquitin-like domain superfamily
Braf	10090.ENSMUSP00000002487	SMART	SM00109	Protein kinase C conserved region 1 (C1) domains (Cysteine-rich domains)
Braf	10090.ENSMUSP00000002487	SMART	SM00455	Raf-like Ras-binding domain
Dnmt3a	10090.ENSMUSP00000020991	GO Process	GO:0000003	Reproduction
Dnmt3a	10090.ENSMUSP00000020991	GO Process	GO:0000122	Negative regulation of transcription by rna polymerase ii
Dnmt3a	10090.ENSMUSP00000020991	GO Process	GO:0000278	Mitotic cell cycle
Dnmt3a	10090.ENSMUSP00000020991	GO Process	GO:0001101	Response to acid chemical
Dnmt3a	10090.ENSMUSP00000020991	GO Process	GO:0001666	Response to hypoxia
Dnmt3a	10090.ENSMUSP00000020991	GO Process	GO:0003006	Developmental process involved in reproduction
Dnmt3a	10090.ENSMUSP00000020991	GO Process	GO:0006139	Nucleobase-containing compound metabolic process
Dnmt3a	10090.ENSMUSP00000020991	GO Process	GO:0006259	DNA metabolic process
Dnmt3a	10090.ENSMUSP00000020991	GO Process	GO:0006304	DNA modification
Dnmt3a	10090.ENSMUSP00000020991	GO Process	GO:0006305	DNA alkylation
Dnmt3a	10090.ENSMUSP00000020991	GO Process	GO:0006306	DNA methylation
Dnmt3a	10090.ENSMUSP00000020991	GO Process	GO:0006323	DNA packaging
Dnmt3a	10090.ENSMUSP00000020991	GO Process	GO:0006325	Chromatin organization
Dnmt3a	10090.ENSMUSP00000020991	GO Process	GO:0006333	Chromatin assembly or disassembly
Dnmt3a	10090.ENSMUSP00000020991	GO Process	GO:0006338	Chromatin remodeling
Dnmt3a	10090.ENSMUSP00000020991	GO Process	GO:0006346	DNA methylation-dependent heterochromatin assembly
Dnmt3a	10090.ENSMUSP00000020991	GO Process	GO:0006349	Regulation of gene expression by genetic imprinting
Dnmt3a	10090.ENSMUSP00000020991	GO Process	GO:0006355	Regulation of transcription, dna-templated
Dnmt3a	10090.ENSMUSP00000020991	GO Process	GO:0006357	Regulation of transcription by rna polymerase ii
Dnmt3a	10090.ENSMUSP00000020991	GO Process	GO:0006725	Cellular aromatic compound metabolic process
Dnmt3a	10090.ENSMUSP00000020991	GO Process	GO:0006807	Nitrogen compound metabolic process
Dnmt3a	10090.ENSMUSP00000020991	GO Process	GO:0006915	Apoptotic process
Dnmt3a	10090.ENSMUSP00000020991	GO Process	GO:0006950	Response to stress
Dnmt3a	10090.ENSMUSP00000020991	GO Process	GO:0006996	Organelle organization
Dnmt3a	10090.ENSMUSP00000020991	GO Process	GO:0007049	Cell cycle
Dnmt3a	10090.ENSMUSP00000020991	GO Process	GO:0007275	Multicellular organism development
Dnmt3a	10090.ENSMUSP00000020991	GO Process	GO:0007276	Gamete generation
Dnmt3a	10090.ENSMUSP00000020991	GO Process	GO:0007283	Spermatogenesis
Dnmt3a	10090.ENSMUSP00000020991	GO Process	GO:0007399	Nervous system development
Dnmt3a	10090.ENSMUSP00000020991	GO Process	GO:0007568	Aging
Dnmt3a	10090.ENSMUSP00000020991	GO Process	GO:0007584	Response to nutrient
Dnmt3a	10090.ENSMUSP00000020991	GO Process	GO:0008152	Metabolic process
Dnmt3a	10090.ENSMUSP00000020991	GO Process	GO:0008219	Cell death
Dnmt3a	10090.ENSMUSP00000020991	GO Process	GO:0009314	Response to radiation
Dnmt3a	10090.ENSMUSP00000020991	GO Process	GO:0009605	Response to external stimulus
Dnmt3a	10090.ENSMUSP00000020991	GO Process	GO:0009628	Response to abiotic stimulus
Dnmt3a	10090.ENSMUSP00000020991	GO Process	GO:0009719	Response to endogenous stimulus
Dnmt3a	10090.ENSMUSP00000020991	GO Process	GO:0009790	Embryo development
Dnmt3a	10090.ENSMUSP00000020991	GO Process	GO:0009889	Regulation of biosynthetic process
Dnmt3a	10090.ENSMUSP00000020991	GO Process	GO:0009890	Negative regulation of biosynthetic process
Dnmt3a	10090.ENSMUSP00000020991	GO Process	GO:0009892	Negative regulation of metabolic process
Dnmt3a	10090.ENSMUSP00000020991	GO Process	GO:0009987	Cellular process
Dnmt3a	10090.ENSMUSP00000020991	GO Process	GO:0009991	Response to extracellular stimulus
Dnmt3a	10090.ENSMUSP00000020991	GO Process	GO:0010033	Response to organic substance
Dnmt3a	10090.ENSMUSP00000020991	GO Process	GO:0010035	Response to inorganic substance
Dnmt3a	10090.ENSMUSP00000020991	GO Process	GO:0010038	Response to metal ion
Dnmt3a	10090.ENSMUSP00000020991	GO Process	GO:0010212	Response to ionizing radiation
Dnmt3a	10090.ENSMUSP00000020991	GO Process	GO:0010216	Maintenance of dna methylation
Dnmt3a	10090.ENSMUSP00000020991	GO Process	GO:0010243	Response to organonitrogen compound
Dnmt3a	10090.ENSMUSP00000020991	GO Process	GO:0010288	Response to lead ion
Dnmt3a	10090.ENSMUSP00000020991	GO Process	GO:0010468	Regulation of gene expression
Dnmt3a	10090.ENSMUSP00000020991	GO Process	GO:0010556	Regulation of macromolecule biosynthetic process
Dnmt3a	10090.ENSMUSP00000020991	GO Process	GO:0010558	Negative regulation of macromolecule biosynthetic process
Dnmt3a	10090.ENSMUSP00000020991	GO Process	GO:0010605	Negative regulation of macromolecule metabolic process
Dnmt3a	10090.ENSMUSP00000020991	GO Process	GO:0010629	Negative regulation of gene expression
Dnmt3a	10090.ENSMUSP00000020991	GO Process	GO:0010941	Regulation of cell death
Dnmt3a	10090.ENSMUSP00000020991	GO Process	GO:0010942	Positive regulation of cell death
Dnmt3a	10090.ENSMUSP00000020991	GO Process	GO:0012501	Programmed cell death
Dnmt3a	10090.ENSMUSP00000020991	GO Process	GO:0014070	Response to organic cyclic compound
Dnmt3a	10090.ENSMUSP00000020991	GO Process	GO:0016043	Cellular component organization
Dnmt3a	10090.ENSMUSP00000020991	GO Process	GO:0016569	Covalent chromatin modification
Dnmt3a	10090.ENSMUSP00000020991	GO Process	GO:0019219	Regulation of nucleobase-containing compound metabolic process
Dnmt3a	10090.ENSMUSP00000020991	GO Process	GO:0019222	Regulation of metabolic process
Dnmt3a	10090.ENSMUSP00000020991	GO Process	GO:0019953	Sexual reproduction
Dnmt3a	10090.ENSMUSP00000020991	GO Process	GO:0022008	Neurogenesis
Dnmt3a	10090.ENSMUSP00000020991	GO Process	GO:0022412	Cellular process involved in reproduction in multicellular organism
Dnmt3a	10090.ENSMUSP00000020991	GO Process	GO:0022414	Reproductive process
Dnmt3a	10090.ENSMUSP00000020991	GO Process	GO:0022607	Cellular component assembly
Dnmt3a	10090.ENSMUSP00000020991	GO Process	GO:0030154	Cell differentiation
Dnmt3a	10090.ENSMUSP00000020991	GO Process	GO:0030182	Neuron differentiation
Dnmt3a	10090.ENSMUSP00000020991	GO Process	GO:0031323	Regulation of cellular metabolic process
Dnmt3a	10090.ENSMUSP00000020991	GO Process	GO:0031324	Negative regulation of cellular metabolic process
Dnmt3a	10090.ENSMUSP00000020991	GO Process	GO:0031326	Regulation of cellular biosynthetic process
Dnmt3a	10090.ENSMUSP00000020991	GO Process	GO:0031327	Negative regulation of cellular biosynthetic process
Dnmt3a	10090.ENSMUSP00000020991	GO Process	GO:0031497	Chromatin assembly
Dnmt3a	10090.ENSMUSP00000020991	GO Process	GO:0031507	Heterochromatin assembly
Dnmt3a	10090.ENSMUSP00000020991	GO Process	GO:0031667	Response to nutrient levels
Dnmt3a	10090.ENSMUSP00000020991	GO Process	GO:0032259	Methylation
Dnmt3a	10090.ENSMUSP00000020991	GO Process	GO:0032355	Response to estradiol
Dnmt3a	10090.ENSMUSP00000020991	GO Process	GO:0032501	Multicellular organismal process
Dnmt3a	10090.ENSMUSP00000020991	GO Process	GO:0032502	Developmental process
Dnmt3a	10090.ENSMUSP00000020991	GO Process	GO:0032504	Multicellular organism reproduction
Dnmt3a	10090.ENSMUSP00000020991	GO Process	GO:0032776	DNA methylation on cytosine
Dnmt3a	10090.ENSMUSP00000020991	GO Process	GO:0033189	Response to vitamin a
Dnmt3a	10090.ENSMUSP00000020991	GO Process	GO:0033273	Response to vitamin
Dnmt3a	10090.ENSMUSP00000020991	GO Process	GO:0033554	Cellular response to stress
Dnmt3a	10090.ENSMUSP00000020991	GO Process	GO:0033993	Response to lipid
Dnmt3a	10090.ENSMUSP00000020991	GO Process	GO:0034401	Chromatin organization involved in regulation of transcription
Dnmt3a	10090.ENSMUSP00000020991	GO Process	GO:0034641	Cellular nitrogen compound metabolic process
Dnmt3a	10090.ENSMUSP00000020991	GO Process	GO:0036293	Response to decreased oxygen levels
Dnmt3a	10090.ENSMUSP00000020991	GO Process	GO:0036294	Cellular response to decreased oxygen levels
Dnmt3a	10090.ENSMUSP00000020991	GO Process	GO:0040029	Regulation of gene expression, epigenetic
Dnmt3a	10090.ENSMUSP00000020991	GO Process	GO:0042220	Response to cocaine
Dnmt3a	10090.ENSMUSP00000020991	GO Process	GO:0042221	Response to chemical
Dnmt3a	10090.ENSMUSP00000020991	GO Process	GO:0043045	DNA methylation involved in embryo development
Dnmt3a	10090.ENSMUSP00000020991	GO Process	GO:0043046	DNA methylation involved in gamete generation
Dnmt3a	10090.ENSMUSP00000020991	GO Process	GO:0043170	Macromolecule metabolic process
Dnmt3a	10090.ENSMUSP00000020991	GO Process	GO:0043200	Response to amino acid
Dnmt3a	10090.ENSMUSP00000020991	GO Process	GO:0043279	Response to alkaloid
Dnmt3a	10090.ENSMUSP00000020991	GO Process	GO:0043412	Macromolecule modification
Dnmt3a	10090.ENSMUSP00000020991	GO Process	GO:0043414	Macromolecule methylation
Dnmt3a	10090.ENSMUSP00000020991	GO Process	GO:0044026	DNA hypermethylation
Dnmt3a	10090.ENSMUSP00000020991	GO Process	GO:0044027	Hypermethylation of cpg island
Dnmt3a	10090.ENSMUSP00000020991	GO Process	GO:0044030	Regulation of dna methylation
Dnmt3a	10090.ENSMUSP00000020991	GO Process	GO:0044085	Cellular component biogenesis
Dnmt3a	10090.ENSMUSP00000020991	GO Process	GO:0044237	Cellular metabolic process
Dnmt3a	10090.ENSMUSP00000020991	GO Process	GO:0044238	Primary metabolic process
Dnmt3a	10090.ENSMUSP00000020991	GO Process	GO:0044260	Cellular macromolecule metabolic process
Dnmt3a	10090.ENSMUSP00000020991	GO Process	GO:0044703	Multi-organism reproductive process
Dnmt3a	10090.ENSMUSP00000020991	GO Process	GO:0044728	DNA methylation or demethylation
Dnmt3a	10090.ENSMUSP00000020991	GO Process	GO:0045471	Response to ethanol
Dnmt3a	10090.ENSMUSP00000020991	GO Process	GO:0045892	Negative regulation of transcription, dna-templated
Dnmt3a	10090.ENSMUSP00000020991	GO Process	GO:0045934	Negative regulation of nucleobase-containing compound metabolic process
Dnmt3a	10090.ENSMUSP00000020991	GO Process	GO:0046483	Heterocycle metabolic process
Dnmt3a	10090.ENSMUSP00000020991	GO Process	GO:0048232	Male gamete generation
Dnmt3a	10090.ENSMUSP00000020991	GO Process	GO:0048518	Positive regulation of biological process
Dnmt3a	10090.ENSMUSP00000020991	GO Process	GO:0048519	Negative regulation of biological process
Dnmt3a	10090.ENSMUSP00000020991	GO Process	GO:0048522	Positive regulation of cellular process
Dnmt3a	10090.ENSMUSP00000020991	GO Process	GO:0048523	Negative regulation of cellular process
Dnmt3a	10090.ENSMUSP00000020991	GO Process	GO:0048609	Multicellular organismal reproductive process
Dnmt3a	10090.ENSMUSP00000020991	GO Process	GO:0048699	Generation of neurons
Dnmt3a	10090.ENSMUSP00000020991	GO Process	GO:0048731	System development
Dnmt3a	10090.ENSMUSP00000020991	GO Process	GO:0048856	Anatomical structure development
Dnmt3a	10090.ENSMUSP00000020991	GO Process	GO:0048869	Cellular developmental process
Dnmt3a	10090.ENSMUSP00000020991	GO Process	GO:0050789	Regulation of biological process
Dnmt3a	10090.ENSMUSP00000020991	GO Process	GO:0050794	Regulation of cellular process
Dnmt3a	10090.ENSMUSP00000020991	GO Process	GO:0050896	Response to stimulus
Dnmt3a	10090.ENSMUSP00000020991	GO Process	GO:0051052	Regulation of dna metabolic process
Dnmt3a	10090.ENSMUSP00000020991	GO Process	GO:0051171	Regulation of nitrogen compound metabolic process
Dnmt3a	10090.ENSMUSP00000020991	GO Process	GO:0051172	Negative regulation of nitrogen compound metabolic process
Dnmt3a	10090.ENSMUSP00000020991	GO Process	GO:0051252	Regulation of rna metabolic process
Dnmt3a	10090.ENSMUSP00000020991	GO Process	GO:0051253	Negative regulation of rna metabolic process
Dnmt3a	10090.ENSMUSP00000020991	GO Process	GO:0051276	Chromosome organization
Dnmt3a	10090.ENSMUSP00000020991	GO Process	GO:0051704	Multi-organism process
Dnmt3a	10090.ENSMUSP00000020991	GO Process	GO:0051716	Cellular response to stimulus
Dnmt3a	10090.ENSMUSP00000020991	GO Process	GO:0060255	Regulation of macromolecule metabolic process
Dnmt3a	10090.ENSMUSP00000020991	GO Process	GO:0065007	Biological regulation
Dnmt3a	10090.ENSMUSP00000020991	GO Process	GO:0070482	Response to oxygen levels
Dnmt3a	10090.ENSMUSP00000020991	GO Process	GO:0070828	Heterochromatin organization
Dnmt3a	10090.ENSMUSP00000020991	GO Process	GO:0070887	Cellular response to chemical stimulus
Dnmt3a	10090.ENSMUSP00000020991	GO Process	GO:0071103	DNA conformation change
Dnmt3a	10090.ENSMUSP00000020991	GO Process	GO:0071229	Cellular response to acid chemical
Dnmt3a	10090.ENSMUSP00000020991	GO Process	GO:0071230	Cellular response to amino acid stimulus
Dnmt3a	10090.ENSMUSP00000020991	GO Process	GO:0071310	Cellular response to organic substance
Dnmt3a	10090.ENSMUSP00000020991	GO Process	GO:0071361	Cellular response to ethanol
Dnmt3a	10090.ENSMUSP00000020991	GO Process	GO:0071417	Cellular response to organonitrogen compound
Dnmt3a	10090.ENSMUSP00000020991	GO Process	GO:0071453	Cellular response to oxygen levels
Dnmt3a	10090.ENSMUSP00000020991	GO Process	GO:0071456	Cellular response to hypoxia
Dnmt3a	10090.ENSMUSP00000020991	GO Process	GO:0071495	Cellular response to endogenous stimulus
Dnmt3a	10090.ENSMUSP00000020991	GO Process	GO:0071514	Genetic imprinting
Dnmt3a	10090.ENSMUSP00000020991	GO Process	GO:0071704	Organic substance metabolic process
Dnmt3a	10090.ENSMUSP00000020991	GO Process	GO:0071840	Cellular component organization or biogenesis
Dnmt3a	10090.ENSMUSP00000020991	GO Process	GO:0080090	Regulation of primary metabolic process
Dnmt3a	10090.ENSMUSP00000020991	GO Process	GO:0090116	C-5 methylation of cytosine
Dnmt3a	10090.ENSMUSP00000020991	GO Process	GO:0090304	Nucleic acid metabolic process
Dnmt3a	10090.ENSMUSP00000020991	GO Process	GO:0097284	Hepatocyte apoptotic process
Dnmt3a	10090.ENSMUSP00000020991	GO Process	GO:0097305	Response to alcohol
Dnmt3a	10090.ENSMUSP00000020991	GO Process	GO:0097306	Cellular response to alcohol
Dnmt3a	10090.ENSMUSP00000020991	GO Process	GO:0097549	Chromatin organization involved in negative regulation of transcription
Dnmt3a	10090.ENSMUSP00000020991	GO Process	GO:1901360	Organic cyclic compound metabolic process
Dnmt3a	10090.ENSMUSP00000020991	GO Process	GO:1901538	Changes to dna methylation involved in embryo development
Dnmt3a	10090.ENSMUSP00000020991	GO Process	GO:1901698	Response to nitrogen compound
Dnmt3a	10090.ENSMUSP00000020991	GO Process	GO:1901699	Cellular response to nitrogen compound
Dnmt3a	10090.ENSMUSP00000020991	GO Process	GO:1901700	Response to oxygen-containing compound
Dnmt3a	10090.ENSMUSP00000020991	GO Process	GO:1901701	Cellular response to oxygen-containing compound
Dnmt3a	10090.ENSMUSP00000020991	GO Process	GO:1902679	Negative regulation of rna biosynthetic process
Dnmt3a	10090.ENSMUSP00000020991	GO Process	GO:1903506	Regulation of nucleic acid-templated transcription
Dnmt3a	10090.ENSMUSP00000020991	GO Process	GO:1903507	Negative regulation of nucleic acid-templated transcription
Dnmt3a	10090.ENSMUSP00000020991	GO Process	GO:1904019	Epithelial cell apoptotic process
Dnmt3a	10090.ENSMUSP00000020991	GO Process	GO:2000112	Regulation of cellular macromolecule biosynthetic process
Dnmt3a	10090.ENSMUSP00000020991	GO Process	GO:2000113	Negative regulation of cellular macromolecule biosynthetic process
Dnmt3a	10090.ENSMUSP00000020991	GO Process	GO:2001141	Regulation of rna biosynthetic process
Dnmt3a	10090.ENSMUSP00000020991	GO Function	GO:0000976	Transcription regulatory region sequence-specific dna binding
Dnmt3a	10090.ENSMUSP00000020991	GO Function	GO:0000977	RNA polymerase II transcription regulatory region sequence-specific DNA binding
Dnmt3a	10090.ENSMUSP00000020991	GO Function	GO:0000978	RNA polymerase II cis-regulatory region sequence-specific DNA binding
Dnmt3a	10090.ENSMUSP00000020991	GO Function	GO:0000987	Cis-regulatory region sequence-specific dna binding
Dnmt3a	10090.ENSMUSP00000020991	GO Function	GO:0001067	Regulatory region nucleic acid binding
Dnmt3a	10090.ENSMUSP00000020991	GO Function	GO:0003676	Nucleic acid binding
Dnmt3a	10090.ENSMUSP00000020991	GO Function	GO:0003677	DNA binding
Dnmt3a	10090.ENSMUSP00000020991	GO Function	GO:0003682	Chromatin binding
Dnmt3a	10090.ENSMUSP00000020991	GO Function	GO:0003690	Double-stranded dna binding
Dnmt3a	10090.ENSMUSP00000020991	GO Function	GO:0003824	Catalytic activity
Dnmt3a	10090.ENSMUSP00000020991	GO Function	GO:0003886	DNA (cytosine-5-)-methyltransferase activity
Dnmt3a	10090.ENSMUSP00000020991	GO Function	GO:0005488	Binding
Dnmt3a	10090.ENSMUSP00000020991	GO Function	GO:0005515	Protein binding
Dnmt3a	10090.ENSMUSP00000020991	GO Function	GO:0008134	Transcription factor binding
Dnmt3a	10090.ENSMUSP00000020991	GO Function	GO:0008168	Methyltransferase activity
Dnmt3a	10090.ENSMUSP00000020991	GO Function	GO:0008757	S-adenosylmethionine-dependent methyltransferase activity
Dnmt3a	10090.ENSMUSP00000020991	GO Function	GO:0009008	DNA-methyltransferase activity
Dnmt3a	10090.ENSMUSP00000020991	GO Function	GO:0016740	Transferase activity
Dnmt3a	10090.ENSMUSP00000020991	GO Function	GO:0016741	Transferase activity, transferring one-carbon groups
Dnmt3a	10090.ENSMUSP00000020991	GO Function	GO:0042802	Identical protein binding
Dnmt3a	10090.ENSMUSP00000020991	GO Function	GO:0043167	Ion binding
Dnmt3a	10090.ENSMUSP00000020991	GO Function	GO:0043169	Cation binding
Dnmt3a	10090.ENSMUSP00000020991	GO Function	GO:0043565	Sequence-specific dna binding
Dnmt3a	10090.ENSMUSP00000020991	GO Function	GO:0046872	Metal ion binding
Dnmt3a	10090.ENSMUSP00000020991	GO Function	GO:0051719	DNA (cytosine-5-)-methyltransferase activity, acting on CpN substrates
Dnmt3a	10090.ENSMUSP00000020991	GO Function	GO:0097159	Organic cyclic compound binding
Dnmt3a	10090.ENSMUSP00000020991	GO Function	GO:0140097	Catalytic activity, acting on dna
Dnmt3a	10090.ENSMUSP00000020991	GO Function	GO:1901363	Heterocyclic compound binding
Dnmt3a	10090.ENSMUSP00000020991	GO Function	GO:1990837	Sequence-specific double-stranded dna binding
Dnmt3a	10090.ENSMUSP00000020991	GO Component	GO:0000228	Nuclear chromosome
Dnmt3a	10090.ENSMUSP00000020991	GO Component	GO:0000775	Chromosome, centromeric region
Dnmt3a	10090.ENSMUSP00000020991	GO Component	GO:0000785	Chromatin
Dnmt3a	10090.ENSMUSP00000020991	GO Component	GO:0000790	Nuclear chromatin
Dnmt3a	10090.ENSMUSP00000020991	GO Component	GO:0000791	Euchromatin
Dnmt3a	10090.ENSMUSP00000020991	GO Component	GO:0000792	Heterochromatin
Dnmt3a	10090.ENSMUSP00000020991	GO Component	GO:0000803	Sex chromosome
Dnmt3a	10090.ENSMUSP00000020991	GO Component	GO:0001741	XY body
Dnmt3a	10090.ENSMUSP00000020991	GO Component	GO:0005622	Intracellular
Dnmt3a	10090.ENSMUSP00000020991	GO Component	GO:0005634	Nucleus
Dnmt3a	10090.ENSMUSP00000020991	GO Component	GO:0005654	Nucleoplasm
Dnmt3a	10090.ENSMUSP00000020991	GO Component	GO:0005694	Chromosome
Dnmt3a	10090.ENSMUSP00000020991	GO Component	GO:0005720	Nuclear heterochromatin
Dnmt3a	10090.ENSMUSP00000020991	GO Component	GO:0005737	Cytoplasm
Dnmt3a	10090.ENSMUSP00000020991	GO Component	GO:0016363	Nuclear matrix
Dnmt3a	10090.ENSMUSP00000020991	GO Component	GO:0031974	Membrane-enclosed lumen
Dnmt3a	10090.ENSMUSP00000020991	GO Component	GO:0031981	Nuclear lumen
Dnmt3a	10090.ENSMUSP00000020991	GO Component	GO:0034399	Nuclear periphery
Dnmt3a	10090.ENSMUSP00000020991	GO Component	GO:0043226	Organelle
Dnmt3a	10090.ENSMUSP00000020991	GO Component	GO:0043227	Membrane-bounded organelle
Dnmt3a	10090.ENSMUSP00000020991	GO Component	GO:0043228	Non-membrane-bounded organelle
Dnmt3a	10090.ENSMUSP00000020991	GO Component	GO:0043229	Intracellular organelle
Dnmt3a	10090.ENSMUSP00000020991	GO Component	GO:0043231	Intracellular membrane-bounded organelle
Dnmt3a	10090.ENSMUSP00000020991	GO Component	GO:0043232	Intracellular non-membrane-bounded organelle
Dnmt3a	10090.ENSMUSP00000020991	GO Component	GO:0043233	Organelle lumen
Dnmt3a	10090.ENSMUSP00000020991	GO Component	GO:0070013	Intracellular organelle lumen
Dnmt3a	10090.ENSMUSP00000020991	GO Component	GO:0098687	Chromosomal region
Dnmt3a	10090.ENSMUSP00000020991	GO Component	GO:0110165	Cellular anatomical entity
Dnmt3a	10090.ENSMUSP00000020991	STRING clusters	CL:413	Mixed, incl. core histone h2a/h2b/h3/h4, and histone deacetylase complex
Dnmt3a	10090.ENSMUSP00000020991	STRING clusters	CL:414	Mixed, incl. core histone h2a/h2b/h3/h4, and histone deacetylase complex
Dnmt3a	10090.ENSMUSP00000020991	STRING clusters	CL:415	Mixed, incl. core histone h2a/h2b/h3/h4, and histone deacetylase complex
Dnmt3a	10090.ENSMUSP00000020991	STRING clusters	CL:416	Mixed, incl. core histone h2a/h2b/h3/h4, and tata box binding protein associated factor (taf)
Dnmt3a	10090.ENSMUSP00000020991	STRING clusters	CL:417	Core histone H2A/H2B/H3/H4, and TATA box binding protein associated factor (TAF)
Dnmt3a	10090.ENSMUSP00000020991	STRING clusters	CL:418	HDACs deacetylate histones, and Histone H2A
Dnmt3a	10090.ENSMUSP00000020991	STRING clusters	CL:500	Mixed, incl. add domain, and chromo shadow domain
Dnmt3a	10090.ENSMUSP00000020991	STRING clusters	CL:502	Mixed, incl. dna methylation on cytosine, and chromo shadow domain
Dnmt3a	10090.ENSMUSP00000020991	STRING clusters	CL:505	DNMT3, cysteine rich ADD domain, and DNA (cytosine-5)-methyltransferase 1-like
Dnmt3a	10090.ENSMUSP00000020991	KEGG	mmu00270	Cysteine and methionine metabolism
Dnmt3a	10090.ENSMUSP00000020991	KEGG	mmu01100	Metabolic pathways
Dnmt3a	10090.ENSMUSP00000020991	KEGG	mmu05206	MicroRNAs in cancer
Dnmt3a	10090.ENSMUSP00000020991	Reactome	MMU-212165	Epigenetic regulation of gene expression
Dnmt3a	10090.ENSMUSP00000020991	Reactome	MMU-212300	PRC2 methylates histones and DNA
Dnmt3a	10090.ENSMUSP00000020991	Reactome	MMU-3214858	RMTs methylate histone arginines
Dnmt3a	10090.ENSMUSP00000020991	Reactome	MMU-3247509	Chromatin modifying enzymes
Dnmt3a	10090.ENSMUSP00000020991	Reactome	MMU-4839726	Chromatin organization
Dnmt3a	10090.ENSMUSP00000020991	Reactome	MMU-74160	Gene expression (Transcription)
Dnmt3a	10090.ENSMUSP00000020991	WikiPathways	WP1763	PluriNetWork: mechanisms associated with pluripotency
Dnmt3a	10090.ENSMUSP00000020991	WikiPathways	WP1770	One-carbon metabolism and related pathways
Dnmt3a	10090.ENSMUSP00000020991	WikiPathways	WP435	One-carbon metabolism
Dnmt3a	10090.ENSMUSP00000020991	WikiPathways	WP730	Glutathione and one-carbon metabolism
Dnmt3a	10090.ENSMUSP00000020991	TISSUES	BTO:0000000	Tissues, cell types and enzyme sources
Dnmt3a	10090.ENSMUSP00000020991	TISSUES	BTO:0000042	Animal
Dnmt3a	10090.ENSMUSP00000020991	TISSUES	BTO:0000080	Male reproductive gland
Dnmt3a	10090.ENSMUSP00000020991	TISSUES	BTO:0000081	Reproductive system
Dnmt3a	10090.ENSMUSP00000020991	TISSUES	BTO:0000082	Male reproductive system
Dnmt3a	10090.ENSMUSP00000020991	TISSUES	BTO:0000083	Female reproductive system
Dnmt3a	10090.ENSMUSP00000020991	TISSUES	BTO:0000149	Breast
Dnmt3a	10090.ENSMUSP00000020991	TISSUES	BTO:0000174	Embryonic structure
Dnmt3a	10090.ENSMUSP00000020991	TISSUES	BTO:0000254	Female reproductive gland
Dnmt3a	10090.ENSMUSP00000020991	TISSUES	BTO:0000284	Organism form
Dnmt3a	10090.ENSMUSP00000020991	TISSUES	BTO:0000379	Embryo
Dnmt3a	10090.ENSMUSP00000020991	TISSUES	BTO:0000431	Excretory gland
Dnmt3a	10090.ENSMUSP00000020991	TISSUES	BTO:0000522	Gland
Dnmt3a	10090.ENSMUSP00000020991	TISSUES	BTO:0000534	Gonad
Dnmt3a	10090.ENSMUSP00000020991	TISSUES	BTO:0000570	Hematopoietic system
Dnmt3a	10090.ENSMUSP00000020991	TISSUES	BTO:0000671	Kidney
Dnmt3a	10090.ENSMUSP00000020991	TISSUES	BTO:0000753	Lymphoid tissue
Dnmt3a	10090.ENSMUSP00000020991	TISSUES	BTO:0000817	Mammary gland
Dnmt3a	10090.ENSMUSP00000020991	TISSUES	BTO:0001244	Urinary tract
Dnmt3a	10090.ENSMUSP00000020991	TISSUES	BTO:0001281	Spleen
Dnmt3a	10090.ENSMUSP00000020991	TISSUES	BTO:0001363	Testis
Dnmt3a	10090.ENSMUSP00000020991	TISSUES	BTO:0001368	Thorax
Dnmt3a	10090.ENSMUSP00000020991	TISSUES	BTO:0001488	Endocrine gland
Dnmt3a	10090.ENSMUSP00000020991	TISSUES	BTO:0001489	Whole body
Dnmt3a	10090.ENSMUSP00000020991	TISSUES	BTO:0001491	Viscus
Dnmt3a	10090.ENSMUSP00000020991	TISSUES	BTO:0001493	Trunk
Dnmt3a	10090.ENSMUSP00000020991	TISSUES	BTO:0003091	Urogenital system
Dnmt3a	10090.ENSMUSP00000020991	TISSUES	BTO:0003092	Urinary system
Dnmt3a	10090.ENSMUSP00000020991	TISSUES	BTO:0003096	Internal male genital organ
Dnmt3a	10090.ENSMUSP00000020991	TISSUES	BTO:0005810	Immune system
Dnmt3a	10090.ENSMUSP00000020991	COMPARTMENTS	GOCC:0000775	Chromosome, centromeric region
Dnmt3a	10090.ENSMUSP00000020991	COMPARTMENTS	GOCC:0000785	Chromatin
Dnmt3a	10090.ENSMUSP00000020991	COMPARTMENTS	GOCC:0000791	Euchromatin
Dnmt3a	10090.ENSMUSP00000020991	COMPARTMENTS	GOCC:0000792	Heterochromatin
Dnmt3a	10090.ENSMUSP00000020991	COMPARTMENTS	GOCC:0000803	Sex chromosome
Dnmt3a	10090.ENSMUSP00000020991	COMPARTMENTS	GOCC:0001741	XY body
Dnmt3a	10090.ENSMUSP00000020991	COMPARTMENTS	GOCC:0005622	Intracellular
Dnmt3a	10090.ENSMUSP00000020991	COMPARTMENTS	GOCC:0005634	Nucleus
Dnmt3a	10090.ENSMUSP00000020991	COMPARTMENTS	GOCC:0005654	Nucleoplasm
Dnmt3a	10090.ENSMUSP00000020991	COMPARTMENTS	GOCC:0005694	Chromosome
Dnmt3a	10090.ENSMUSP00000020991	COMPARTMENTS	GOCC:0005737	Cytoplasm
Dnmt3a	10090.ENSMUSP00000020991	COMPARTMENTS	GOCC:0016363	Nuclear matrix
Dnmt3a	10090.ENSMUSP00000020991	COMPARTMENTS	GOCC:0031974	Membrane-enclosed lumen
Dnmt3a	10090.ENSMUSP00000020991	COMPARTMENTS	GOCC:0031981	Nuclear lumen
Dnmt3a	10090.ENSMUSP00000020991	COMPARTMENTS	GOCC:0032991	Protein-containing complex
Dnmt3a	10090.ENSMUSP00000020991	COMPARTMENTS	GOCC:0034399	Nuclear periphery
Dnmt3a	10090.ENSMUSP00000020991	COMPARTMENTS	GOCC:0034708	Methyltransferase complex
Dnmt3a	10090.ENSMUSP00000020991	COMPARTMENTS	GOCC:0043226	Organelle
Dnmt3a	10090.ENSMUSP00000020991	COMPARTMENTS	GOCC:0043227	Membrane-bounded organelle
Dnmt3a	10090.ENSMUSP00000020991	COMPARTMENTS	GOCC:0043228	Non-membrane-bounded organelle
Dnmt3a	10090.ENSMUSP00000020991	COMPARTMENTS	GOCC:0043229	Intracellular organelle
Dnmt3a	10090.ENSMUSP00000020991	COMPARTMENTS	GOCC:0043231	Intracellular membrane-bounded organelle
Dnmt3a	10090.ENSMUSP00000020991	COMPARTMENTS	GOCC:0043232	Intracellular non-membrane-bounded organelle
Dnmt3a	10090.ENSMUSP00000020991	COMPARTMENTS	GOCC:0043233	Organelle lumen
Dnmt3a	10090.ENSMUSP00000020991	COMPARTMENTS	GOCC:0070013	Intracellular organelle lumen
Dnmt3a	10090.ENSMUSP00000020991	COMPARTMENTS	GOCC:0098687	Chromosomal region
Dnmt3a	10090.ENSMUSP00000020991	COMPARTMENTS	GOCC:0110165	Cellular anatomical entity
Dnmt3a	10090.ENSMUSP00000020991	COMPARTMENTS	GOCC:0140020	DNA methyltransferase complex
Dnmt3a	10090.ENSMUSP00000020991	COMPARTMENTS	GOCC:1902494	Catalytic complex
Dnmt3a	10090.ENSMUSP00000020991	COMPARTMENTS	GOCC:1990234	Transferase complex
Dnmt3a	10090.ENSMUSP00000020991	Monarch MPO	MP:0000003	Abnormal adipose tissue morphology
Dnmt3a	10090.ENSMUSP00000020991	Monarch MPO	MP:0000192	Abnormal mineral level
Dnmt3a	10090.ENSMUSP00000020991	Monarch MPO	MP:0000653	Abnormal sex gland morphology
Dnmt3a	10090.ENSMUSP00000020991	Monarch MPO	MP:0000937	Abnormal motor neuron morphology
Dnmt3a	10090.ENSMUSP00000020991	Monarch MPO	MP:0000939	Decreased motor neuron number
Dnmt3a	10090.ENSMUSP00000020991	Monarch MPO	MP:0000947	Convulsive seizures
Dnmt3a	10090.ENSMUSP00000020991	Monarch MPO	MP:0000955	Abnormal spinal cord morphology
Dnmt3a	10090.ENSMUSP00000020991	Monarch MPO	MP:0001051	Abnormal somatic motor system morphology
Dnmt3a	10090.ENSMUSP00000020991	Monarch MPO	MP:0001053	Abnormal neuromuscular synapse morphology
Dnmt3a	10090.ENSMUSP00000020991	Monarch MPO	MP:0001116	Small gonad
Dnmt3a	10090.ENSMUSP00000020991	Monarch MPO	MP:0001145	Abnormal male reproductive system morphology
Dnmt3a	10090.ENSMUSP00000020991	Monarch MPO	MP:0001146	Abnormal testis morphology
Dnmt3a	10090.ENSMUSP00000020991	Monarch MPO	MP:0001147	Small testis
Dnmt3a	10090.ENSMUSP00000020991	Monarch MPO	MP:0001265	Decreased body size
Dnmt3a	10090.ENSMUSP00000020991	Monarch MPO	MP:0001392	Abnormal locomotor behavior
Dnmt3a	10090.ENSMUSP00000020991	Monarch MPO	MP:0001402	Decreased locomotor activity
Dnmt3a	10090.ENSMUSP00000020991	Monarch MPO	MP:0001413	Abnormal response to new environment
Dnmt3a	10090.ENSMUSP00000020991	Monarch MPO	MP:0001417	Decreased exploration in new environment
Dnmt3a	10090.ENSMUSP00000020991	Monarch MPO	MP:0001515	Abnormal grip strength
Dnmt3a	10090.ENSMUSP00000020991	Monarch MPO	MP:0001533	Abnormal skeleton physiology
Dnmt3a	10090.ENSMUSP00000020991	Monarch MPO	MP:0001570	Abnormal circulating enzyme level
Dnmt3a	10090.ENSMUSP00000020991	Monarch MPO	MP:0001672	Abnormal embryo development
Dnmt3a	10090.ENSMUSP00000020991	Monarch MPO	MP:0001697	Abnormal embryo size
Dnmt3a	10090.ENSMUSP00000020991	Monarch MPO	MP:0001764	Abnormal homeostasis
Dnmt3a	10090.ENSMUSP00000020991	Monarch MPO	MP:0001765	Abnormal ion homeostasis
Dnmt3a	10090.ENSMUSP00000020991	Monarch MPO	MP:0001770	Abnormal iron level
Dnmt3a	10090.ENSMUSP00000020991	Monarch MPO	MP:0002063	Abnormal learning/memory/conditioning
Dnmt3a	10090.ENSMUSP00000020991	Monarch MPO	MP:0002064	Seizures
Dnmt3a	10090.ENSMUSP00000020991	Monarch MPO	MP:0002066	Abnormal motor capabilities/coordination/movement
Dnmt3a	10090.ENSMUSP00000020991	Monarch MPO	MP:0002082	Postnatal lethality
Dnmt3a	10090.ENSMUSP00000020991	Monarch MPO	MP:0002083	Premature death
Dnmt3a	10090.ENSMUSP00000020991	Monarch MPO	MP:0002084	Abnormal developmental patterning
Dnmt3a	10090.ENSMUSP00000020991	Monarch MPO	MP:0002085	Abnormal embryonic tissue morphology
Dnmt3a	10090.ENSMUSP00000020991	Monarch MPO	MP:0002088	Abnormal embryonic growth/weight/body size
Dnmt3a	10090.ENSMUSP00000020991	Monarch MPO	MP:0002089	Abnormal postnatal growth/weight/body size
Dnmt3a	10090.ENSMUSP00000020991	Monarch MPO	MP:0002123	Abnormal definitive hematopoiesis
Dnmt3a	10090.ENSMUSP00000020991	Monarch MPO	MP:0002160	Abnormal reproductive system morphology
Dnmt3a	10090.ENSMUSP00000020991	Monarch MPO	MP:0002163	Abnormal gland morphology
Dnmt3a	10090.ENSMUSP00000020991	Monarch MPO	MP:0002210	Abnormal sex determination
Dnmt3a	10090.ENSMUSP00000020991	Monarch MPO	MP:0002211	Abnormal primary sex determination
Dnmt3a	10090.ENSMUSP00000020991	Monarch MPO	MP:0002396	Abnormal hematopoietic system morphology/development
Dnmt3a	10090.ENSMUSP00000020991	Monarch MPO	MP:0002398	Abnormal bone marrow cell morphology/development
Dnmt3a	10090.ENSMUSP00000020991	Monarch MPO	MP:0002399	Abnormal pluripotent precursor cell morphology
Dnmt3a	10090.ENSMUSP00000020991	Monarch MPO	MP:0002400	Abnormal multipotent stem cell morphology
Dnmt3a	10090.ENSMUSP00000020991	Monarch MPO	MP:0002429	Abnormal blood cell morphology/development
Dnmt3a	10090.ENSMUSP00000020991	Monarch MPO	MP:0002572	Abnormal emotion/affect behavior
Dnmt3a	10090.ENSMUSP00000020991	Monarch MPO	MP:0002752	Abnormal somatic nervous system morphology
Dnmt3a	10090.ENSMUSP00000020991	Monarch MPO	MP:0002882	Abnormal neuron morphology
Dnmt3a	10090.ENSMUSP00000020991	Monarch MPO	MP:0002896	Abnormal bone mineralization
Dnmt3a	10090.ENSMUSP00000020991	Monarch MPO	MP:0003107	Abnormal response to novelty
Dnmt3a	10090.ENSMUSP00000020991	Monarch MPO	MP:0003491	Abnormal voluntary movement
Dnmt3a	10090.ENSMUSP00000020991	Monarch MPO	MP:0003631	Nervous system phenotype
Dnmt3a	10090.ENSMUSP00000020991	Monarch MPO	MP:0003632	Abnormal nervous system morphology
Dnmt3a	10090.ENSMUSP00000020991	Monarch MPO	MP:0003633	Abnormal nervous system physiology
Dnmt3a	10090.ENSMUSP00000020991	Monarch MPO	MP:0003795	Abnormal bone structure
Dnmt3a	10090.ENSMUSP00000020991	Monarch MPO	MP:0003956	Abnormal body size
Dnmt3a	10090.ENSMUSP00000020991	Monarch MPO	MP:0003959	Abnormal lean body mass
Dnmt3a	10090.ENSMUSP00000020991	Monarch MPO	MP:0003961	Decreased lean body mass
Dnmt3a	10090.ENSMUSP00000020991	Monarch MPO	MP:0004152	Abnormal circulating iron level
Dnmt3a	10090.ENSMUSP00000020991	Monarch MPO	MP:0004196	Abnormal prenatal growth/weight/body size
Dnmt3a	10090.ENSMUSP00000020991	Monarch MPO	MP:0004262	Abnormal physical strength
Dnmt3a	10090.ENSMUSP00000020991	Monarch MPO	MP:0004808	Abnormal hematopoietic stem cell morphology
Dnmt3a	10090.ENSMUSP00000020991	Monarch MPO	MP:0004809	Increased hematopoietic stem cell number
Dnmt3a	10090.ENSMUSP00000020991	Monarch MPO	MP:0004849	Abnormal testis size
Dnmt3a	10090.ENSMUSP00000020991	Monarch MPO	MP:0004850	Abnormal testis weight
Dnmt3a	10090.ENSMUSP00000020991	Monarch MPO	MP:0004852	Decreased testis weight
Dnmt3a	10090.ENSMUSP00000020991	Monarch MPO	MP:0004924	Abnormal behavior
Dnmt3a	10090.ENSMUSP00000020991	Monarch MPO	MP:0005221	Abnormal rostral-caudal axis patterning
Dnmt3a	10090.ENSMUSP00000020991	Monarch MPO	MP:0005319	Abnormal enzyme/coenzyme level
Dnmt3a	10090.ENSMUSP00000020991	Monarch MPO	MP:0005369	Muscle phenotype
Dnmt3a	10090.ENSMUSP00000020991	Monarch MPO	MP:0005375	Adipose tissue phenotype
Dnmt3a	10090.ENSMUSP00000020991	Monarch MPO	MP:0005376	Homeostasis/metabolism phenotype
Dnmt3a	10090.ENSMUSP00000020991	Monarch MPO	MP:0005378	Growth/size/body region phenotype
Dnmt3a	10090.ENSMUSP00000020991	Monarch MPO	MP:0005379	Endocrine/exocrine gland phenotype
Dnmt3a	10090.ENSMUSP00000020991	Monarch MPO	MP:0005380	Embryo phenotype
Dnmt3a	10090.ENSMUSP00000020991	Monarch MPO	MP:0005386	Behavior/neurological phenotype
Dnmt3a	10090.ENSMUSP00000020991	Monarch MPO	MP:0005389	Reproductive system phenotype
Dnmt3a	10090.ENSMUSP00000020991	Monarch MPO	MP:0005390	Skeleton phenotype
Dnmt3a	10090.ENSMUSP00000020991	Monarch MPO	MP:0005397	Hematopoietic system phenotype
Dnmt3a	10090.ENSMUSP00000020991	Monarch MPO	MP:0005416	Abnormal circulating protein level
Dnmt3a	10090.ENSMUSP00000020991	Monarch MPO	MP:0005451	Abnormal body composition
Dnmt3a	10090.ENSMUSP00000020991	Monarch MPO	MP:0005452	Abnormal adipose tissue amount
Dnmt3a	10090.ENSMUSP00000020991	Monarch MPO	MP:0005508	Abnormal skeleton morphology
Dnmt3a	10090.ENSMUSP00000020991	Monarch MPO	MP:0005636	Abnormal mineral homeostasis
Dnmt3a	10090.ENSMUSP00000020991	Monarch MPO	MP:0005637	Abnormal iron homeostasis
Dnmt3a	10090.ENSMUSP00000020991	Monarch MPO	MP:0006357	Abnormal circulating mineral level
Dnmt3a	10090.ENSMUSP00000020991	Monarch MPO	MP:0006410	Abnormal common myeloid progenitor cell morphology
Dnmt3a	10090.ENSMUSP00000020991	Monarch MPO	MP:0008271	Abnormal bone ossification
Dnmt3a	10090.ENSMUSP00000020991	Monarch MPO	MP:0008469	Abnormal protein level
Dnmt3a	10090.ENSMUSP00000020991	Monarch MPO	MP:0008503	Abnormal spinal cord grey matter morphology
Dnmt3a	10090.ENSMUSP00000020991	Monarch MPO	MP:0008804	Abnormal circulating amylase level
Dnmt3a	10090.ENSMUSP00000020991	Monarch MPO	MP:0008806	Increased circulating amylase level
Dnmt3a	10090.ENSMUSP00000020991	Monarch MPO	MP:0008810	Increased circulating iron level
Dnmt3a	10090.ENSMUSP00000020991	Monarch MPO	MP:0008946	Abnormal neuron number
Dnmt3a	10090.ENSMUSP00000020991	Monarch MPO	MP:0008948	Decreased neuron number
Dnmt3a	10090.ENSMUSP00000020991	Monarch MPO	MP:0009198	Abnormal male genitalia morphology
Dnmt3a	10090.ENSMUSP00000020991	Monarch MPO	MP:0009205	Abnormal internal male genitalia morphology
Dnmt3a	10090.ENSMUSP00000020991	Monarch MPO	MP:0009538	Abnormal synapse morphology
Dnmt3a	10090.ENSMUSP00000020991	Monarch MPO	MP:0009642	Abnormal blood homeostasis
Dnmt3a	10090.ENSMUSP00000020991	Monarch MPO	MP:0010024	Increased total body fat amount
Dnmt3a	10090.ENSMUSP00000020991	Monarch MPO	MP:0010052	Increased grip strength
Dnmt3a	10090.ENSMUSP00000020991	Monarch MPO	MP:0010053	Decreased grip strength
Dnmt3a	10090.ENSMUSP00000020991	Monarch MPO	MP:0010122	Abnormal bone mineral content
Dnmt3a	10090.ENSMUSP00000020991	Monarch MPO	MP:0010124	Decreased bone mineral content
Dnmt3a	10090.ENSMUSP00000020991	Monarch MPO	MP:0010768	Mortality/aging
Dnmt3a	10090.ENSMUSP00000020991	Monarch MPO	MP:0010769	Abnormal survival
Dnmt3a	10090.ENSMUSP00000020991	Monarch MPO	MP:0010770	Preweaning lethality
Dnmt3a	10090.ENSMUSP00000020991	Monarch MPO	MP:0010832	Lethality during fetal growth through weaning
Dnmt3a	10090.ENSMUSP00000020991	Monarch MPO	MP:0010866	Abnormal prenatal body size
Dnmt3a	10090.ENSMUSP00000020991	Monarch MPO	MP:0011085	Postnatal lethality, complete penetrance
Dnmt3a	10090.ENSMUSP00000020991	Monarch MPO	MP:0011110	Preweaning lethality, incomplete penetrance
Dnmt3a	10090.ENSMUSP00000020991	Monarch MPO	MP:0011180	Abnormal hematopoietic cell number
Dnmt3a	10090.ENSMUSP00000020991	Monarch MPO	MP:0011181	Increased hematopoietic cell number
Dnmt3a	10090.ENSMUSP00000020991	Monarch MPO	MP:0013189	Abnormal exploration in a new environment
Dnmt3a	10090.ENSMUSP00000020991	Monarch MPO	MP:0013325	Abnormal male reproductive gland morphology
Dnmt3a	10090.ENSMUSP00000020991	Monarch MPO	MP:0013656	Abnormal hematopoietic cell morphology
Dnmt3a	10090.ENSMUSP00000020991	Monarch MPO	MP:0013657	Abnormal blood cell morphology
Dnmt3a	10090.ENSMUSP00000020991	Monarch MPO	MP:0013660	Abnormal bone marrow hematopoietic cell morphology
Dnmt3a	10090.ENSMUSP00000020991	Monarch MPO	MP:0013693	Abnormal hemopoiesis
Dnmt3a	10090.ENSMUSP00000020991	Monarch MPO	MP:0013707	Abnormal hematopoietic precursor cell morphology
Dnmt3a	10090.ENSMUSP00000020991	Monarch MPO	MP:0013891	Increased common myeloid progenitor cell number
Dnmt3a	10090.ENSMUSP00000020991	Monarch MPO	MP:0014114	Abnormal cognition
Dnmt3a	10090.ENSMUSP00000020991	Monarch MPO	MP:0014134	Abnormal embryo morphology
Dnmt3a	10090.ENSMUSP00000020991	Monarch MPO	MP:0031392	Hypoactivity
Dnmt3a	10090.ENSMUSP00000020991	UniProt Keywords	KW-0156	Chromatin regulator
Dnmt3a	10090.ENSMUSP00000020991	UniProt Keywords	KW-0238	DNA-binding
Dnmt3a	10090.ENSMUSP00000020991	UniProt Keywords	KW-0479	Metal-binding
Dnmt3a	10090.ENSMUSP00000020991	UniProt Keywords	KW-0488	Methylation
Dnmt3a	10090.ENSMUSP00000020991	UniProt Keywords	KW-0489	Methyltransferase
Dnmt3a	10090.ENSMUSP00000020991	UniProt Keywords	KW-0539	Nucleus
Dnmt3a	10090.ENSMUSP00000020991	UniProt Keywords	KW-0597	Phosphoprotein
Dnmt3a	10090.ENSMUSP00000020991	UniProt Keywords	KW-0678	Repressor
Dnmt3a	10090.ENSMUSP00000020991	UniProt Keywords	KW-0804	Transcription
Dnmt3a	10090.ENSMUSP00000020991	UniProt Keywords	KW-0805	Transcription regulation
Dnmt3a	10090.ENSMUSP00000020991	UniProt Keywords	KW-0808	Transferase
Dnmt3a	10090.ENSMUSP00000020991	UniProt Keywords	KW-0832	Ubl conjugation
Dnmt3a	10090.ENSMUSP00000020991	UniProt Keywords	KW-0862	Zinc
Dnmt3a	10090.ENSMUSP00000020991	UniProt Keywords	KW-0863	Zinc-finger
Dnmt3a	10090.ENSMUSP00000020991	UniProt Keywords	KW-0877	Alternative promoter usage
Dnmt3a	10090.ENSMUSP00000020991	UniProt Keywords	KW-0949	S-adenosyl-L-methionine
Dnmt3a	10090.ENSMUSP00000020991	UniProt Keywords	KW-0963	Cytoplasm
Dnmt3a	10090.ENSMUSP00000020991	UniProt Keywords	KW-1017	Isopeptide bond
Dnmt3a	10090.ENSMUSP00000020991	Pfam	PF00145	C-5 cytosine-specific DNA methylase
Dnmt3a	10090.ENSMUSP00000020991	Pfam	PF00855	PWWP domain
Dnmt3a	10090.ENSMUSP00000020991	InterPro	IPR000313	PWWP domain
Dnmt3a	10090.ENSMUSP00000020991	InterPro	IPR001525	C-5 cytosine methyltransferase
Dnmt3a	10090.ENSMUSP00000020991	InterPro	IPR018117	DNA methylase, C-5 cytosine-specific, active site
Dnmt3a	10090.ENSMUSP00000020991	InterPro	IPR025766	ADD domain
Dnmt3a	10090.ENSMUSP00000020991	InterPro	IPR029063	S-adenosyl-L-methionine-dependent methyltransferase
Dnmt3a	10090.ENSMUSP00000020991	InterPro	IPR030487	DNA (cytosine-5)-methyltransferase 3A
Dnmt3a	10090.ENSMUSP00000020991	InterPro	IPR040552	DNMT3, cysteine rich ADD domain
Dnmt3a	10090.ENSMUSP00000020991	SMART	SM00293	Domain with conserved pwwp motif
Dnmt3b	10090.ENSMUSP00000105396	GO Process	GO:0000122	Negative regulation of transcription by rna polymerase ii
Dnmt3b	10090.ENSMUSP00000105396	GO Process	GO:0001101	Response to acid chemical
Dnmt3b	10090.ENSMUSP00000105396	GO Process	GO:0006139	Nucleobase-containing compound metabolic process
Dnmt3b	10090.ENSMUSP00000105396	GO Process	GO:0006259	DNA metabolic process
Dnmt3b	10090.ENSMUSP00000105396	GO Process	GO:0006304	DNA modification
Dnmt3b	10090.ENSMUSP00000105396	GO Process	GO:0006305	DNA alkylation
Dnmt3b	10090.ENSMUSP00000105396	GO Process	GO:0006306	DNA methylation
Dnmt3b	10090.ENSMUSP00000105396	GO Process	GO:0006323	DNA packaging
Dnmt3b	10090.ENSMUSP00000105396	GO Process	GO:0006325	Chromatin organization
Dnmt3b	10090.ENSMUSP00000105396	GO Process	GO:0006333	Chromatin assembly or disassembly
Dnmt3b	10090.ENSMUSP00000105396	GO Process	GO:0006338	Chromatin remodeling
Dnmt3b	10090.ENSMUSP00000105396	GO Process	GO:0006346	DNA methylation-dependent heterochromatin assembly
Dnmt3b	10090.ENSMUSP00000105396	GO Process	GO:0006349	Regulation of gene expression by genetic imprinting
Dnmt3b	10090.ENSMUSP00000105396	GO Process	GO:0006355	Regulation of transcription, dna-templated
Dnmt3b	10090.ENSMUSP00000105396	GO Process	GO:0006357	Regulation of transcription by rna polymerase ii
Dnmt3b	10090.ENSMUSP00000105396	GO Process	GO:0006725	Cellular aromatic compound metabolic process
Dnmt3b	10090.ENSMUSP00000105396	GO Process	GO:0006807	Nitrogen compound metabolic process
Dnmt3b	10090.ENSMUSP00000105396	GO Process	GO:0006996	Organelle organization
Dnmt3b	10090.ENSMUSP00000105396	GO Process	GO:0007275	Multicellular organism development
Dnmt3b	10090.ENSMUSP00000105396	GO Process	GO:0007399	Nervous system development
Dnmt3b	10090.ENSMUSP00000105396	GO Process	GO:0007549	Dosage compensation
Dnmt3b	10090.ENSMUSP00000105396	GO Process	GO:0008104	Protein localization
Dnmt3b	10090.ENSMUSP00000105396	GO Process	GO:0008152	Metabolic process
Dnmt3b	10090.ENSMUSP00000105396	GO Process	GO:0009048	Dosage compensation by inactivation of x chromosome
Dnmt3b	10090.ENSMUSP00000105396	GO Process	GO:0009719	Response to endogenous stimulus
Dnmt3b	10090.ENSMUSP00000105396	GO Process	GO:0009790	Embryo development
Dnmt3b	10090.ENSMUSP00000105396	GO Process	GO:0009889	Regulation of biosynthetic process
Dnmt3b	10090.ENSMUSP00000105396	GO Process	GO:0009890	Negative regulation of biosynthetic process
Dnmt3b	10090.ENSMUSP00000105396	GO Process	GO:0009892	Negative regulation of metabolic process
Dnmt3b	10090.ENSMUSP00000105396	GO Process	GO:0009893	Positive regulation of metabolic process
Dnmt3b	10090.ENSMUSP00000105396	GO Process	GO:0009987	Cellular process
Dnmt3b	10090.ENSMUSP00000105396	GO Process	GO:0010033	Response to organic substance
Dnmt3b	10090.ENSMUSP00000105396	GO Process	GO:0010243	Response to organonitrogen compound
Dnmt3b	10090.ENSMUSP00000105396	GO Process	GO:0010468	Regulation of gene expression
Dnmt3b	10090.ENSMUSP00000105396	GO Process	GO:0010556	Regulation of macromolecule biosynthetic process
Dnmt3b	10090.ENSMUSP00000105396	GO Process	GO:0010558	Negative regulation of macromolecule biosynthetic process
Dnmt3b	10090.ENSMUSP00000105396	GO Process	GO:0010604	Positive regulation of macromolecule metabolic process
Dnmt3b	10090.ENSMUSP00000105396	GO Process	GO:0010605	Negative regulation of macromolecule metabolic process
Dnmt3b	10090.ENSMUSP00000105396	GO Process	GO:0010628	Positive regulation of gene expression
Dnmt3b	10090.ENSMUSP00000105396	GO Process	GO:0010629	Negative regulation of gene expression
Dnmt3b	10090.ENSMUSP00000105396	GO Process	GO:0010638	Positive regulation of organelle organization
Dnmt3b	10090.ENSMUSP00000105396	GO Process	GO:0010639	Negative regulation of organelle organization
Dnmt3b	10090.ENSMUSP00000105396	GO Process	GO:0010720	Positive regulation of cell development
Dnmt3b	10090.ENSMUSP00000105396	GO Process	GO:0016043	Cellular component organization
Dnmt3b	10090.ENSMUSP00000105396	GO Process	GO:0016569	Covalent chromatin modification
Dnmt3b	10090.ENSMUSP00000105396	GO Process	GO:0019219	Regulation of nucleobase-containing compound metabolic process
Dnmt3b	10090.ENSMUSP00000105396	GO Process	GO:0019222	Regulation of metabolic process
Dnmt3b	10090.ENSMUSP00000105396	GO Process	GO:0022008	Neurogenesis
Dnmt3b	10090.ENSMUSP00000105396	GO Process	GO:0022607	Cellular component assembly
Dnmt3b	10090.ENSMUSP00000105396	GO Process	GO:0030154	Cell differentiation
Dnmt3b	10090.ENSMUSP00000105396	GO Process	GO:0031056	Regulation of histone modification
Dnmt3b	10090.ENSMUSP00000105396	GO Process	GO:0031057	Negative regulation of histone modification
Dnmt3b	10090.ENSMUSP00000105396	GO Process	GO:0031058	Positive regulation of histone modification
Dnmt3b	10090.ENSMUSP00000105396	GO Process	GO:0031060	Regulation of histone methylation
Dnmt3b	10090.ENSMUSP00000105396	GO Process	GO:0031061	Negative regulation of histone methylation
Dnmt3b	10090.ENSMUSP00000105396	GO Process	GO:0031062	Positive regulation of histone methylation
Dnmt3b	10090.ENSMUSP00000105396	GO Process	GO:0031323	Regulation of cellular metabolic process
Dnmt3b	10090.ENSMUSP00000105396	GO Process	GO:0031324	Negative regulation of cellular metabolic process
Dnmt3b	10090.ENSMUSP00000105396	GO Process	GO:0031325	Positive regulation of cellular metabolic process
Dnmt3b	10090.ENSMUSP00000105396	GO Process	GO:0031326	Regulation of cellular biosynthetic process
Dnmt3b	10090.ENSMUSP00000105396	GO Process	GO:0031327	Negative regulation of cellular biosynthetic process
Dnmt3b	10090.ENSMUSP00000105396	GO Process	GO:0031399	Regulation of protein modification process
Dnmt3b	10090.ENSMUSP00000105396	GO Process	GO:0031400	Negative regulation of protein modification process
Dnmt3b	10090.ENSMUSP00000105396	GO Process	GO:0031401	Positive regulation of protein modification process
Dnmt3b	10090.ENSMUSP00000105396	GO Process	GO:0031497	Chromatin assembly
Dnmt3b	10090.ENSMUSP00000105396	GO Process	GO:0031503	Protein-containing complex localization
Dnmt3b	10090.ENSMUSP00000105396	GO Process	GO:0031507	Heterochromatin assembly
Dnmt3b	10090.ENSMUSP00000105396	GO Process	GO:0032259	Methylation
Dnmt3b	10090.ENSMUSP00000105396	GO Process	GO:0032268	Regulation of cellular protein metabolic process
Dnmt3b	10090.ENSMUSP00000105396	GO Process	GO:0032269	Negative regulation of cellular protein metabolic process
Dnmt3b	10090.ENSMUSP00000105396	GO Process	GO:0032270	Positive regulation of cellular protein metabolic process
Dnmt3b	10090.ENSMUSP00000105396	GO Process	GO:0032501	Multicellular organismal process
Dnmt3b	10090.ENSMUSP00000105396	GO Process	GO:0032502	Developmental process
Dnmt3b	10090.ENSMUSP00000105396	GO Process	GO:0032776	DNA methylation on cytosine
Dnmt3b	10090.ENSMUSP00000105396	GO Process	GO:0033036	Macromolecule localization
Dnmt3b	10090.ENSMUSP00000105396	GO Process	GO:0033043	Regulation of organelle organization
Dnmt3b	10090.ENSMUSP00000105396	GO Process	GO:0033044	Regulation of chromosome organization
Dnmt3b	10090.ENSMUSP00000105396	GO Process	GO:0034401	Chromatin organization involved in regulation of transcription
Dnmt3b	10090.ENSMUSP00000105396	GO Process	GO:0034641	Cellular nitrogen compound metabolic process
Dnmt3b	10090.ENSMUSP00000105396	GO Process	GO:0040029	Regulation of gene expression, epigenetic
Dnmt3b	10090.ENSMUSP00000105396	GO Process	GO:0042221	Response to chemical
Dnmt3b	10090.ENSMUSP00000105396	GO Process	GO:0043045	DNA methylation involved in embryo development
Dnmt3b	10090.ENSMUSP00000105396	GO Process	GO:0043170	Macromolecule metabolic process
Dnmt3b	10090.ENSMUSP00000105396	GO Process	GO:0043200	Response to amino acid
Dnmt3b	10090.ENSMUSP00000105396	GO Process	GO:0043412	Macromolecule modification
Dnmt3b	10090.ENSMUSP00000105396	GO Process	GO:0043414	Macromolecule methylation
Dnmt3b	10090.ENSMUSP00000105396	GO Process	GO:0044085	Cellular component biogenesis
Dnmt3b	10090.ENSMUSP00000105396	GO Process	GO:0044237	Cellular metabolic process
Dnmt3b	10090.ENSMUSP00000105396	GO Process	GO:0044238	Primary metabolic process
Dnmt3b	10090.ENSMUSP00000105396	GO Process	GO:0044260	Cellular macromolecule metabolic process
Dnmt3b	10090.ENSMUSP00000105396	GO Process	GO:0044728	DNA methylation or demethylation
Dnmt3b	10090.ENSMUSP00000105396	GO Process	GO:0045595	Regulation of cell differentiation
Dnmt3b	10090.ENSMUSP00000105396	GO Process	GO:0045597	Positive regulation of cell differentiation
Dnmt3b	10090.ENSMUSP00000105396	GO Process	GO:0045664	Regulation of neuron differentiation
Dnmt3b	10090.ENSMUSP00000105396	GO Process	GO:0045666	Positive regulation of neuron differentiation
Dnmt3b	10090.ENSMUSP00000105396	GO Process	GO:0045814	Negative regulation of gene expression, epigenetic
Dnmt3b	10090.ENSMUSP00000105396	GO Process	GO:0045892	Negative regulation of transcription, dna-templated
Dnmt3b	10090.ENSMUSP00000105396	GO Process	GO:0045934	Negative regulation of nucleobase-containing compound metabolic process
Dnmt3b	10090.ENSMUSP00000105396	GO Process	GO:0046483	Heterocycle metabolic process
Dnmt3b	10090.ENSMUSP00000105396	GO Process	GO:0048518	Positive regulation of biological process
Dnmt3b	10090.ENSMUSP00000105396	GO Process	GO:0048519	Negative regulation of biological process
Dnmt3b	10090.ENSMUSP00000105396	GO Process	GO:0048522	Positive regulation of cellular process
Dnmt3b	10090.ENSMUSP00000105396	GO Process	GO:0048523	Negative regulation of cellular process
Dnmt3b	10090.ENSMUSP00000105396	GO Process	GO:0048699	Generation of neurons
Dnmt3b	10090.ENSMUSP00000105396	GO Process	GO:0048731	System development
Dnmt3b	10090.ENSMUSP00000105396	GO Process	GO:0048856	Anatomical structure development
Dnmt3b	10090.ENSMUSP00000105396	GO Process	GO:0048869	Cellular developmental process
Dnmt3b	10090.ENSMUSP00000105396	GO Process	GO:0050767	Regulation of neurogenesis
Dnmt3b	10090.ENSMUSP00000105396	GO Process	GO:0050769	Positive regulation of neurogenesis
Dnmt3b	10090.ENSMUSP00000105396	GO Process	GO:0050789	Regulation of biological process
Dnmt3b	10090.ENSMUSP00000105396	GO Process	GO:0050793	Regulation of developmental process
Dnmt3b	10090.ENSMUSP00000105396	GO Process	GO:0050794	Regulation of cellular process
Dnmt3b	10090.ENSMUSP00000105396	GO Process	GO:0050896	Response to stimulus
Dnmt3b	10090.ENSMUSP00000105396	GO Process	GO:0051094	Positive regulation of developmental process
Dnmt3b	10090.ENSMUSP00000105396	GO Process	GO:0051128	Regulation of cellular component organization
Dnmt3b	10090.ENSMUSP00000105396	GO Process	GO:0051129	Negative regulation of cellular component organization
Dnmt3b	10090.ENSMUSP00000105396	GO Process	GO:0051130	Positive regulation of cellular component organization
Dnmt3b	10090.ENSMUSP00000105396	GO Process	GO:0051171	Regulation of nitrogen compound metabolic process
Dnmt3b	10090.ENSMUSP00000105396	GO Process	GO:0051172	Negative regulation of nitrogen compound metabolic process
Dnmt3b	10090.ENSMUSP00000105396	GO Process	GO:0051173	Positive regulation of nitrogen compound metabolic process
Dnmt3b	10090.ENSMUSP00000105396	GO Process	GO:0051179	Localization
Dnmt3b	10090.ENSMUSP00000105396	GO Process	GO:0051239	Regulation of multicellular organismal process
Dnmt3b	10090.ENSMUSP00000105396	GO Process	GO:0051240	Positive regulation of multicellular organismal process
Dnmt3b	10090.ENSMUSP00000105396	GO Process	GO:0051246	Regulation of protein metabolic process
Dnmt3b	10090.ENSMUSP00000105396	GO Process	GO:0051247	Positive regulation of protein metabolic process
Dnmt3b	10090.ENSMUSP00000105396	GO Process	GO:0051248	Negative regulation of protein metabolic process
Dnmt3b	10090.ENSMUSP00000105396	GO Process	GO:0051252	Regulation of rna metabolic process
Dnmt3b	10090.ENSMUSP00000105396	GO Process	GO:0051253	Negative regulation of rna metabolic process
Dnmt3b	10090.ENSMUSP00000105396	GO Process	GO:0051276	Chromosome organization
Dnmt3b	10090.ENSMUSP00000105396	GO Process	GO:0051569	Regulation of histone h3-k4 methylation
Dnmt3b	10090.ENSMUSP00000105396	GO Process	GO:0051570	Regulation of histone h3-k9 methylation
Dnmt3b	10090.ENSMUSP00000105396	GO Process	GO:0051571	Positive regulation of histone h3-k4 methylation
Dnmt3b	10090.ENSMUSP00000105396	GO Process	GO:0051573	Negative regulation of histone h3-k9 methylation
Dnmt3b	10090.ENSMUSP00000105396	GO Process	GO:0051716	Cellular response to stimulus
Dnmt3b	10090.ENSMUSP00000105396	GO Process	GO:0051960	Regulation of nervous system development
Dnmt3b	10090.ENSMUSP00000105396	GO Process	GO:0051962	Positive regulation of nervous system development
Dnmt3b	10090.ENSMUSP00000105396	GO Process	GO:0060255	Regulation of macromolecule metabolic process
Dnmt3b	10090.ENSMUSP00000105396	GO Process	GO:0060284	Regulation of cell development
Dnmt3b	10090.ENSMUSP00000105396	GO Process	GO:0060821	Inactivation of x chromosome by dna methylation
Dnmt3b	10090.ENSMUSP00000105396	GO Process	GO:0065007	Biological regulation
Dnmt3b	10090.ENSMUSP00000105396	GO Process	GO:0065009	Regulation of molecular function
Dnmt3b	10090.ENSMUSP00000105396	GO Process	GO:0070828	Heterochromatin organization
Dnmt3b	10090.ENSMUSP00000105396	GO Process	GO:0070887	Cellular response to chemical stimulus
Dnmt3b	10090.ENSMUSP00000105396	GO Process	GO:0071103	DNA conformation change
Dnmt3b	10090.ENSMUSP00000105396	GO Process	GO:0071229	Cellular response to acid chemical
Dnmt3b	10090.ENSMUSP00000105396	GO Process	GO:0071230	Cellular response to amino acid stimulus
Dnmt3b	10090.ENSMUSP00000105396	GO Process	GO:0071310	Cellular response to organic substance
Dnmt3b	10090.ENSMUSP00000105396	GO Process	GO:0071417	Cellular response to organonitrogen compound
Dnmt3b	10090.ENSMUSP00000105396	GO Process	GO:0071495	Cellular response to endogenous stimulus
Dnmt3b	10090.ENSMUSP00000105396	GO Process	GO:0071514	Genetic imprinting
Dnmt3b	10090.ENSMUSP00000105396	GO Process	GO:0071704	Organic substance metabolic process
Dnmt3b	10090.ENSMUSP00000105396	GO Process	GO:0071840	Cellular component organization or biogenesis
Dnmt3b	10090.ENSMUSP00000105396	GO Process	GO:0080090	Regulation of primary metabolic process
Dnmt3b	10090.ENSMUSP00000105396	GO Process	GO:0090116	C-5 methylation of cytosine
Dnmt3b	10090.ENSMUSP00000105396	GO Process	GO:0090304	Nucleic acid metabolic process
Dnmt3b	10090.ENSMUSP00000105396	GO Process	GO:0097549	Chromatin organization involved in negative regulation of transcription
Dnmt3b	10090.ENSMUSP00000105396	GO Process	GO:1901360	Organic cyclic compound metabolic process
Dnmt3b	10090.ENSMUSP00000105396	GO Process	GO:1901538	Changes to dna methylation involved in embryo development
Dnmt3b	10090.ENSMUSP00000105396	GO Process	GO:1901698	Response to nitrogen compound
Dnmt3b	10090.ENSMUSP00000105396	GO Process	GO:1901699	Cellular response to nitrogen compound
Dnmt3b	10090.ENSMUSP00000105396	GO Process	GO:1901700	Response to oxygen-containing compound
Dnmt3b	10090.ENSMUSP00000105396	GO Process	GO:1901701	Cellular response to oxygen-containing compound
Dnmt3b	10090.ENSMUSP00000105396	GO Process	GO:1902275	Regulation of chromatin organization
Dnmt3b	10090.ENSMUSP00000105396	GO Process	GO:1902679	Negative regulation of rna biosynthetic process
Dnmt3b	10090.ENSMUSP00000105396	GO Process	GO:1903506	Regulation of nucleic acid-templated transcription
Dnmt3b	10090.ENSMUSP00000105396	GO Process	GO:1903507	Negative regulation of nucleic acid-templated transcription
Dnmt3b	10090.ENSMUSP00000105396	GO Process	GO:1905268	Negative regulation of chromatin organization
Dnmt3b	10090.ENSMUSP00000105396	GO Process	GO:1905269	Positive regulation of chromatin organization
Dnmt3b	10090.ENSMUSP00000105396	GO Process	GO:2000026	Regulation of multicellular organismal development
Dnmt3b	10090.ENSMUSP00000105396	GO Process	GO:2000112	Regulation of cellular macromolecule biosynthetic process
Dnmt3b	10090.ENSMUSP00000105396	GO Process	GO:2000113	Negative regulation of cellular macromolecule biosynthetic process
Dnmt3b	10090.ENSMUSP00000105396	GO Process	GO:2001141	Regulation of rna biosynthetic process
Dnmt3b	10090.ENSMUSP00000105396	GO Process	GO:2001251	Negative regulation of chromosome organization
Dnmt3b	10090.ENSMUSP00000105396	GO Process	GO:2001252	Positive regulation of chromosome organization
Dnmt3b	10090.ENSMUSP00000105396	GO Function	GO:0003676	Nucleic acid binding
Dnmt3b	10090.ENSMUSP00000105396	GO Function	GO:0003677	DNA binding
Dnmt3b	10090.ENSMUSP00000105396	GO Function	GO:0003682	Chromatin binding
Dnmt3b	10090.ENSMUSP00000105396	GO Function	GO:0003712	Transcription coregulator activity
Dnmt3b	10090.ENSMUSP00000105396	GO Function	GO:0003714	Transcription corepressor activity
Dnmt3b	10090.ENSMUSP00000105396	GO Function	GO:0003824	Catalytic activity
Dnmt3b	10090.ENSMUSP00000105396	GO Function	GO:0003886	DNA (cytosine-5-)-methyltransferase activity
Dnmt3b	10090.ENSMUSP00000105396	GO Function	GO:0005488	Binding
Dnmt3b	10090.ENSMUSP00000105396	GO Function	GO:0005515	Protein binding
Dnmt3b	10090.ENSMUSP00000105396	GO Function	GO:0008168	Methyltransferase activity
Dnmt3b	10090.ENSMUSP00000105396	GO Function	GO:0008757	S-adenosylmethionine-dependent methyltransferase activity
Dnmt3b	10090.ENSMUSP00000105396	GO Function	GO:0009008	DNA-methyltransferase activity
Dnmt3b	10090.ENSMUSP00000105396	GO Function	GO:0016740	Transferase activity
Dnmt3b	10090.ENSMUSP00000105396	GO Function	GO:0016741	Transferase activity, transferring one-carbon groups
Dnmt3b	10090.ENSMUSP00000105396	GO Function	GO:0019899	Enzyme binding
Dnmt3b	10090.ENSMUSP00000105396	GO Function	GO:0042826	Histone deacetylase binding
Dnmt3b	10090.ENSMUSP00000105396	GO Function	GO:0043167	Ion binding
Dnmt3b	10090.ENSMUSP00000105396	GO Function	GO:0043169	Cation binding
Dnmt3b	10090.ENSMUSP00000105396	GO Function	GO:0046872	Metal ion binding
Dnmt3b	10090.ENSMUSP00000105396	GO Function	GO:0051718	DNA (cytosine-5-)-methyltransferase activity, acting on CpG substrates
Dnmt3b	10090.ENSMUSP00000105396	GO Function	GO:0051719	DNA (cytosine-5-)-methyltransferase activity, acting on CpN substrates
Dnmt3b	10090.ENSMUSP00000105396	GO Function	GO:0097159	Organic cyclic compound binding
Dnmt3b	10090.ENSMUSP00000105396	GO Function	GO:0098772	Molecular function regulator
Dnmt3b	10090.ENSMUSP00000105396	GO Function	GO:0140097	Catalytic activity, acting on dna
Dnmt3b	10090.ENSMUSP00000105396	GO Function	GO:0140110	Transcription regulator activity
Dnmt3b	10090.ENSMUSP00000105396	GO Function	GO:1901363	Heterocyclic compound binding
Dnmt3b	10090.ENSMUSP00000105396	GO Component	GO:0000228	Nuclear chromosome
Dnmt3b	10090.ENSMUSP00000105396	GO Component	GO:0000775	Chromosome, centromeric region
Dnmt3b	10090.ENSMUSP00000105396	GO Component	GO:0000785	Chromatin
Dnmt3b	10090.ENSMUSP00000105396	GO Component	GO:0000790	Nuclear chromatin
Dnmt3b	10090.ENSMUSP00000105396	GO Component	GO:0000792	Heterochromatin
Dnmt3b	10090.ENSMUSP00000105396	GO Component	GO:0005622	Intracellular
Dnmt3b	10090.ENSMUSP00000105396	GO Component	GO:0005634	Nucleus
Dnmt3b	10090.ENSMUSP00000105396	GO Component	GO:0005654	Nucleoplasm
Dnmt3b	10090.ENSMUSP00000105396	GO Component	GO:0005694	Chromosome
Dnmt3b	10090.ENSMUSP00000105396	GO Component	GO:0005720	Nuclear heterochromatin
Dnmt3b	10090.ENSMUSP00000105396	GO Component	GO:0005737	Cytoplasm
Dnmt3b	10090.ENSMUSP00000105396	GO Component	GO:0031974	Membrane-enclosed lumen
Dnmt3b	10090.ENSMUSP00000105396	GO Component	GO:0031981	Nuclear lumen
Dnmt3b	10090.ENSMUSP00000105396	GO Component	GO:0043226	Organelle
Dnmt3b	10090.ENSMUSP00000105396	GO Component	GO:0043227	Membrane-bounded organelle
Dnmt3b	10090.ENSMUSP00000105396	GO Component	GO:0043228	Non-membrane-bounded organelle
Dnmt3b	10090.ENSMUSP00000105396	GO Component	GO:0043229	Intracellular organelle
Dnmt3b	10090.ENSMUSP00000105396	GO Component	GO:0043231	Intracellular membrane-bounded organelle
Dnmt3b	10090.ENSMUSP00000105396	GO Component	GO:0043232	Intracellular non-membrane-bounded organelle
Dnmt3b	10090.ENSMUSP00000105396	GO Component	GO:0043233	Organelle lumen
Dnmt3b	10090.ENSMUSP00000105396	GO Component	GO:0070013	Intracellular organelle lumen
Dnmt3b	10090.ENSMUSP00000105396	GO Component	GO:0098687	Chromosomal region
Dnmt3b	10090.ENSMUSP00000105396	GO Component	GO:0110165	Cellular anatomical entity
Dnmt3b	10090.ENSMUSP00000105396	STRING clusters	CL:413	Mixed, incl. core histone h2a/h2b/h3/h4, and histone deacetylase complex
Dnmt3b	10090.ENSMUSP00000105396	STRING clusters	CL:414	Mixed, incl. core histone h2a/h2b/h3/h4, and histone deacetylase complex
Dnmt3b	10090.ENSMUSP00000105396	STRING clusters	CL:415	Mixed, incl. core histone h2a/h2b/h3/h4, and histone deacetylase complex
Dnmt3b	10090.ENSMUSP00000105396	STRING clusters	CL:416	Mixed, incl. core histone h2a/h2b/h3/h4, and tata box binding protein associated factor (taf)
Dnmt3b	10090.ENSMUSP00000105396	STRING clusters	CL:417	Core histone H2A/H2B/H3/H4, and TATA box binding protein associated factor (TAF)
Dnmt3b	10090.ENSMUSP00000105396	STRING clusters	CL:418	HDACs deacetylate histones, and Histone H2A
Dnmt3b	10090.ENSMUSP00000105396	STRING clusters	CL:500	Mixed, incl. add domain, and chromo shadow domain
Dnmt3b	10090.ENSMUSP00000105396	STRING clusters	CL:502	Mixed, incl. dna methylation on cytosine, and chromo shadow domain
Dnmt3b	10090.ENSMUSP00000105396	STRING clusters	CL:505	DNMT3, cysteine rich ADD domain, and DNA (cytosine-5)-methyltransferase 1-like
Dnmt3b	10090.ENSMUSP00000105396	KEGG	mmu00270	Cysteine and methionine metabolism
Dnmt3b	10090.ENSMUSP00000105396	KEGG	mmu01100	Metabolic pathways
Dnmt3b	10090.ENSMUSP00000105396	KEGG	mmu05206	MicroRNAs in cancer
Dnmt3b	10090.ENSMUSP00000105396	Reactome	MMU-212165	Epigenetic regulation of gene expression
Dnmt3b	10090.ENSMUSP00000105396	Reactome	MMU-212300	PRC2 methylates histones and DNA
Dnmt3b	10090.ENSMUSP00000105396	Reactome	MMU-2990846	SUMOylation
Dnmt3b	10090.ENSMUSP00000105396	Reactome	MMU-3108232	SUMO E3 ligases SUMOylate target proteins
Dnmt3b	10090.ENSMUSP00000105396	Reactome	MMU-392499	Metabolism of proteins
Dnmt3b	10090.ENSMUSP00000105396	Reactome	MMU-4655427	SUMOylation of DNA methylation proteins
Dnmt3b	10090.ENSMUSP00000105396	Reactome	MMU-597592	Post-translational protein modification
Dnmt3b	10090.ENSMUSP00000105396	Reactome	MMU-74160	Gene expression (Transcription)
Dnmt3b	10090.ENSMUSP00000105396	WikiPathways	WP1763	PluriNetWork: mechanisms associated with pluripotency
Dnmt3b	10090.ENSMUSP00000105396	WikiPathways	WP435	One-carbon metabolism
Dnmt3b	10090.ENSMUSP00000105396	WikiPathways	WP730	Glutathione and one-carbon metabolism
Dnmt3b	10090.ENSMUSP00000105396	TISSUES	BTO:0000000	Tissues, cell types and enzyme sources
Dnmt3b	10090.ENSMUSP00000105396	TISSUES	BTO:0000042	Animal
Dnmt3b	10090.ENSMUSP00000105396	TISSUES	BTO:0000080	Male reproductive gland
Dnmt3b	10090.ENSMUSP00000105396	TISSUES	BTO:0000081	Reproductive system
Dnmt3b	10090.ENSMUSP00000105396	TISSUES	BTO:0000082	Male reproductive system
Dnmt3b	10090.ENSMUSP00000105396	TISSUES	BTO:0000083	Female reproductive system
Dnmt3b	10090.ENSMUSP00000105396	TISSUES	BTO:0000128	Blastula
Dnmt3b	10090.ENSMUSP00000105396	TISSUES	BTO:0000174	Embryonic structure
Dnmt3b	10090.ENSMUSP00000105396	TISSUES	BTO:0000254	Female reproductive gland
Dnmt3b	10090.ENSMUSP00000105396	TISSUES	BTO:0000284	Organism form
Dnmt3b	10090.ENSMUSP00000105396	TISSUES	BTO:0000379	Embryo
Dnmt3b	10090.ENSMUSP00000105396	TISSUES	BTO:0000522	Gland
Dnmt3b	10090.ENSMUSP00000105396	TISSUES	BTO:0000534	Gonad
Dnmt3b	10090.ENSMUSP00000105396	TISSUES	BTO:0001086	Embryonic stem cell
Dnmt3b	10090.ENSMUSP00000105396	TISSUES	BTO:0001099	Blastocyst
Dnmt3b	10090.ENSMUSP00000105396	TISSUES	BTO:0001268	Somatic cell
Dnmt3b	10090.ENSMUSP00000105396	TISSUES	BTO:0001363	Testis
Dnmt3b	10090.ENSMUSP00000105396	TISSUES	BTO:0001488	Endocrine gland
Dnmt3b	10090.ENSMUSP00000105396	TISSUES	BTO:0001489	Whole body
Dnmt3b	10090.ENSMUSP00000105396	TISSUES	BTO:0002322	Cell property
Dnmt3b	10090.ENSMUSP00000105396	TISSUES	BTO:0003091	Urogenital system
Dnmt3b	10090.ENSMUSP00000105396	TISSUES	BTO:0003096	Internal male genital organ
Dnmt3b	10090.ENSMUSP00000105396	TISSUES	BTO:0005876	KMS-11/TKO cell
Dnmt3b	10090.ENSMUSP00000105396	TISSUES	BTO:0006078	Pluripotent stem cell
Dnmt3b	10090.ENSMUSP00000105396	COMPARTMENTS	GOCC:0000775	Chromosome, centromeric region
Dnmt3b	10090.ENSMUSP00000105396	COMPARTMENTS	GOCC:0000785	Chromatin
Dnmt3b	10090.ENSMUSP00000105396	COMPARTMENTS	GOCC:0000792	Heterochromatin
Dnmt3b	10090.ENSMUSP00000105396	COMPARTMENTS	GOCC:0005622	Intracellular
Dnmt3b	10090.ENSMUSP00000105396	COMPARTMENTS	GOCC:0005634	Nucleus
Dnmt3b	10090.ENSMUSP00000105396	COMPARTMENTS	GOCC:0005654	Nucleoplasm
Dnmt3b	10090.ENSMUSP00000105396	COMPARTMENTS	GOCC:0005694	Chromosome
Dnmt3b	10090.ENSMUSP00000105396	COMPARTMENTS	GOCC:0031974	Membrane-enclosed lumen
Dnmt3b	10090.ENSMUSP00000105396	COMPARTMENTS	GOCC:0031981	Nuclear lumen
Dnmt3b	10090.ENSMUSP00000105396	COMPARTMENTS	GOCC:0032991	Protein-containing complex
Dnmt3b	10090.ENSMUSP00000105396	COMPARTMENTS	GOCC:0034708	Methyltransferase complex
Dnmt3b	10090.ENSMUSP00000105396	COMPARTMENTS	GOCC:0043226	Organelle
Dnmt3b	10090.ENSMUSP00000105396	COMPARTMENTS	GOCC:0043227	Membrane-bounded organelle
Dnmt3b	10090.ENSMUSP00000105396	COMPARTMENTS	GOCC:0043228	Non-membrane-bounded organelle
Dnmt3b	10090.ENSMUSP00000105396	COMPARTMENTS	GOCC:0043229	Intracellular organelle
Dnmt3b	10090.ENSMUSP00000105396	COMPARTMENTS	GOCC:0043231	Intracellular membrane-bounded organelle
Dnmt3b	10090.ENSMUSP00000105396	COMPARTMENTS	GOCC:0043232	Intracellular non-membrane-bounded organelle
Dnmt3b	10090.ENSMUSP00000105396	COMPARTMENTS	GOCC:0043233	Organelle lumen
Dnmt3b	10090.ENSMUSP00000105396	COMPARTMENTS	GOCC:0070013	Intracellular organelle lumen
Dnmt3b	10090.ENSMUSP00000105396	COMPARTMENTS	GOCC:0098687	Chromosomal region
Dnmt3b	10090.ENSMUSP00000105396	COMPARTMENTS	GOCC:0110165	Cellular anatomical entity
Dnmt3b	10090.ENSMUSP00000105396	COMPARTMENTS	GOCC:0140020	DNA methyltransferase complex
Dnmt3b	10090.ENSMUSP00000105396	COMPARTMENTS	GOCC:1902494	Catalytic complex
Dnmt3b	10090.ENSMUSP00000105396	COMPARTMENTS	GOCC:1990234	Transferase complex
Dnmt3b	10090.ENSMUSP00000105396	Monarch MPO	MP:0000074	Abnormal neurocranium morphology
Dnmt3b	10090.ENSMUSP00000105396	Monarch MPO	MP:0000077	Abnormal interparietal bone morphology
Dnmt3b	10090.ENSMUSP00000105396	Monarch MPO	MP:0000102	Abnormal nasal bone morphology
Dnmt3b	10090.ENSMUSP00000105396	Monarch MPO	MP:0000107	Abnormal frontal bone morphology
Dnmt3b	10090.ENSMUSP00000105396	Monarch MPO	MP:0000137	Abnormal vertebrae morphology
Dnmt3b	10090.ENSMUSP00000105396	Monarch MPO	MP:0000217	Abnormal leukocyte cell number
Dnmt3b	10090.ENSMUSP00000105396	Monarch MPO	MP:0000218	Increased leukocyte cell number
Dnmt3b	10090.ENSMUSP00000105396	Monarch MPO	MP:0000221	Decreased leukocyte cell number
Dnmt3b	10090.ENSMUSP00000105396	Monarch MPO	MP:0000313	Abnormal cell death
Dnmt3b	10090.ENSMUSP00000105396	Monarch MPO	MP:0000428	Abnormal craniofacial morphology
Dnmt3b	10090.ENSMUSP00000105396	Monarch MPO	MP:0000438	Abnormal cranium morphology
Dnmt3b	10090.ENSMUSP00000105396	Monarch MPO	MP:0000459	Abnormal presacral vertebrae morphology
Dnmt3b	10090.ENSMUSP00000105396	Monarch MPO	MP:0000598	Abnormal liver morphology
Dnmt3b	10090.ENSMUSP00000105396	Monarch MPO	MP:0000601	Small liver
Dnmt3b	10090.ENSMUSP00000105396	Monarch MPO	MP:0000685	Abnormal immune system morphology
Dnmt3b	10090.ENSMUSP00000105396	Monarch MPO	MP:0000703	Abnormal thymus morphology
Dnmt3b	10090.ENSMUSP00000105396	Monarch MPO	MP:0000706	Small thymus
Dnmt3b	10090.ENSMUSP00000105396	Monarch MPO	MP:0000715	Decreased thymocyte number
Dnmt3b	10090.ENSMUSP00000105396	Monarch MPO	MP:0000716	Abnormal immune system cell morphology
Dnmt3b	10090.ENSMUSP00000105396	Monarch MPO	MP:0000717	Abnormal lymphocyte cell number
Dnmt3b	10090.ENSMUSP00000105396	Monarch MPO	MP:0000928	Incomplete rostral neuropore closure
Dnmt3b	10090.ENSMUSP00000105396	Monarch MPO	MP:0000929	Open neural tube
Dnmt3b	10090.ENSMUSP00000105396	Monarch MPO	MP:0001265	Decreased body size
Dnmt3b	10090.ENSMUSP00000105396	Monarch MPO	MP:0001545	Abnormal hematopoietic system physiology
Dnmt3b	10090.ENSMUSP00000105396	Monarch MPO	MP:0001614	Abnormal blood vessel morphology
Dnmt3b	10090.ENSMUSP00000105396	Monarch MPO	MP:0001648	Abnormal apoptosis
Dnmt3b	10090.ENSMUSP00000105396	Monarch MPO	MP:0001672	Abnormal embryo development
Dnmt3b	10090.ENSMUSP00000105396	Monarch MPO	MP:0001697	Abnormal embryo size
Dnmt3b	10090.ENSMUSP00000105396	Monarch MPO	MP:0001698	Decreased embryo size
Dnmt3b	10090.ENSMUSP00000105396	Monarch MPO	MP:0001711	Abnormal placenta morphology
Dnmt3b	10090.ENSMUSP00000105396	Monarch MPO	MP:0001764	Abnormal homeostasis
Dnmt3b	10090.ENSMUSP00000105396	Monarch MPO	MP:0001790	Abnormal immune system physiology
Dnmt3b	10090.ENSMUSP00000105396	Monarch MPO	MP:0001819	Abnormal immune cell physiology
Dnmt3b	10090.ENSMUSP00000105396	Monarch MPO	MP:0002058	Neonatal lethality
Dnmt3b	10090.ENSMUSP00000105396	Monarch MPO	MP:0002060	Abnormal skin morphology
Dnmt3b	10090.ENSMUSP00000105396	Monarch MPO	MP:0002080	Prenatal lethality
Dnmt3b	10090.ENSMUSP00000105396	Monarch MPO	MP:0002081	Perinatal lethality
Dnmt3b	10090.ENSMUSP00000105396	Monarch MPO	MP:0002082	Postnatal lethality
Dnmt3b	10090.ENSMUSP00000105396	Monarch MPO	MP:0002085	Abnormal embryonic tissue morphology
Dnmt3b	10090.ENSMUSP00000105396	Monarch MPO	MP:0002086	Abnormal extraembryonic tissue morphology
Dnmt3b	10090.ENSMUSP00000105396	Monarch MPO	MP:0002088	Abnormal embryonic growth/weight/body size
Dnmt3b	10090.ENSMUSP00000105396	Monarch MPO	MP:0002089	Abnormal postnatal growth/weight/body size
Dnmt3b	10090.ENSMUSP00000105396	Monarch MPO	MP:0002109	Abnormal limb morphology
Dnmt3b	10090.ENSMUSP00000105396	Monarch MPO	MP:0002114	Abnormal axial skeleton morphology
Dnmt3b	10090.ENSMUSP00000105396	Monarch MPO	MP:0002116	Abnormal craniofacial bone morphology
Dnmt3b	10090.ENSMUSP00000105396	Monarch MPO	MP:0002123	Abnormal definitive hematopoiesis
Dnmt3b	10090.ENSMUSP00000105396	Monarch MPO	MP:0002127	Abnormal cardiovascular system morphology
Dnmt3b	10090.ENSMUSP00000105396	Monarch MPO	MP:0002138	Abnormal hepatobiliary system morphology
Dnmt3b	10090.ENSMUSP00000105396	Monarch MPO	MP:0002145	Abnormal t cell differentiation
Dnmt3b	10090.ENSMUSP00000105396	Monarch MPO	MP:0002151	Abnormal neural tube morphology
Dnmt3b	10090.ENSMUSP00000105396	Monarch MPO	MP:0002163	Abnormal gland morphology
Dnmt3b	10090.ENSMUSP00000105396	Monarch MPO	MP:0002164	Abnormal gland physiology
Dnmt3b	10090.ENSMUSP00000105396	Monarch MPO	MP:0002221	Abnormal lymph organ size
Dnmt3b	10090.ENSMUSP00000105396	Monarch MPO	MP:0002364	Abnormal thymus size
Dnmt3b	10090.ENSMUSP00000105396	Monarch MPO	MP:0002396	Abnormal hematopoietic system morphology/development
Dnmt3b	10090.ENSMUSP00000105396	Monarch MPO	MP:0002401	Abnormal lymphopoiesis
Dnmt3b	10090.ENSMUSP00000105396	Monarch MPO	MP:0002407	Abnormal double-negative t cell morphology
Dnmt3b	10090.ENSMUSP00000105396	Monarch MPO	MP:0002408	Abnormal double-positive t cell morphology
Dnmt3b	10090.ENSMUSP00000105396	Monarch MPO	MP:0002420	Abnormal adaptive immunity
Dnmt3b	10090.ENSMUSP00000105396	Monarch MPO	MP:0002421	Abnormal cell-mediated immunity
Dnmt3b	10090.ENSMUSP00000105396	Monarch MPO	MP:0002429	Abnormal blood cell morphology/development
Dnmt3b	10090.ENSMUSP00000105396	Monarch MPO	MP:0002442	Abnormal leukocyte physiology
Dnmt3b	10090.ENSMUSP00000105396	Monarch MPO	MP:0002444	Abnormal t cell physiology
Dnmt3b	10090.ENSMUSP00000105396	Monarch MPO	MP:0002619	Abnormal lymphocyte morphology
Dnmt3b	10090.ENSMUSP00000105396	Monarch MPO	MP:0002722	Abnormal immune system organ morphology
Dnmt3b	10090.ENSMUSP00000105396	Monarch MPO	MP:0003036	Vertebral transformation
Dnmt3b	10090.ENSMUSP00000105396	Monarch MPO	MP:0003047	Abnormal thoracic vertebrae morphology
Dnmt3b	10090.ENSMUSP00000105396	Monarch MPO	MP:0003049	Abnormal lumbar vertebrae morphology
Dnmt3b	10090.ENSMUSP00000105396	Monarch MPO	MP:0003231	Abnormal placenta vasculature
Dnmt3b	10090.ENSMUSP00000105396	Monarch MPO	MP:0003631	Nervous system phenotype
Dnmt3b	10090.ENSMUSP00000105396	Monarch MPO	MP:0003632	Abnormal nervous system morphology
Dnmt3b	10090.ENSMUSP00000105396	Monarch MPO	MP:0003720	Abnormal neural tube closure
Dnmt3b	10090.ENSMUSP00000105396	Monarch MPO	MP:0003762	Abnormal immune organ physiology
Dnmt3b	10090.ENSMUSP00000105396	Monarch MPO	MP:0003763	Abnormal thymus physiology
Dnmt3b	10090.ENSMUSP00000105396	Monarch MPO	MP:0003861	Abnormal nervous system development
Dnmt3b	10090.ENSMUSP00000105396	Monarch MPO	MP:0003945	Abnormal lymphocyte physiology
Dnmt3b	10090.ENSMUSP00000105396	Monarch MPO	MP:0003956	Abnormal body size
Dnmt3b	10090.ENSMUSP00000105396	Monarch MPO	MP:0003984	Embryonic growth retardation
Dnmt3b	10090.ENSMUSP00000105396	Monarch MPO	MP:0004196	Abnormal prenatal growth/weight/body size
Dnmt3b	10090.ENSMUSP00000105396	Monarch MPO	MP:0004375	Enlarged frontal bone
Dnmt3b	10090.ENSMUSP00000105396	Monarch MPO	MP:0004379	Wide frontal bone
Dnmt3b	10090.ENSMUSP00000105396	Monarch MPO	MP:0004386	Enlarged interparietal bone
Dnmt3b	10090.ENSMUSP00000105396	Monarch MPO	MP:0004616	Lumbar vertebral transformation
Dnmt3b	10090.ENSMUSP00000105396	Monarch MPO	MP:0004618	Thoracic vertebral transformation
Dnmt3b	10090.ENSMUSP00000105396	Monarch MPO	MP:0004624	Abnormal thoracic cage morphology
Dnmt3b	10090.ENSMUSP00000105396	Monarch MPO	MP:0004703	Abnormal vertebral column morphology
Dnmt3b	10090.ENSMUSP00000105396	Monarch MPO	MP:0004848	Abnormal liver size
Dnmt3b	10090.ENSMUSP00000105396	Monarch MPO	MP:0005013	Increased lymphocyte cell number
Dnmt3b	10090.ENSMUSP00000105396	Monarch MPO	MP:0005015	Increased t cell number
Dnmt3b	10090.ENSMUSP00000105396	Monarch MPO	MP:0005016	Decreased lymphocyte cell number
Dnmt3b	10090.ENSMUSP00000105396	Monarch MPO	MP:0005018	Decreased t cell number
Dnmt3b	10090.ENSMUSP00000105396	Monarch MPO	MP:0005090	Increased double-negative t cell number
Dnmt3b	10090.ENSMUSP00000105396	Monarch MPO	MP:0005092	Decreased double-positive t cell number
Dnmt3b	10090.ENSMUSP00000105396	Monarch MPO	MP:0005265	Abnormal blood urea nitrogen level
Dnmt3b	10090.ENSMUSP00000105396	Monarch MPO	MP:0005274	Abnormal viscerocranium morphology
Dnmt3b	10090.ENSMUSP00000105396	Monarch MPO	MP:0005370	Liver/biliary system phenotype
Dnmt3b	10090.ENSMUSP00000105396	Monarch MPO	MP:0005371	Limbs/digits/tail phenotype
Dnmt3b	10090.ENSMUSP00000105396	Monarch MPO	MP:0005376	Homeostasis/metabolism phenotype
Dnmt3b	10090.ENSMUSP00000105396	Monarch MPO	MP:0005378	Growth/size/body region phenotype
Dnmt3b	10090.ENSMUSP00000105396	Monarch MPO	MP:0005379	Endocrine/exocrine gland phenotype
Dnmt3b	10090.ENSMUSP00000105396	Monarch MPO	MP:0005380	Embryo phenotype
Dnmt3b	10090.ENSMUSP00000105396	Monarch MPO	MP:0005382	Craniofacial phenotype
Dnmt3b	10090.ENSMUSP00000105396	Monarch MPO	MP:0005384	Cellular phenotype
Dnmt3b	10090.ENSMUSP00000105396	Monarch MPO	MP:0005385	Cardiovascular system phenotype
Dnmt3b	10090.ENSMUSP00000105396	Monarch MPO	MP:0005387	Immune system phenotype
Dnmt3b	10090.ENSMUSP00000105396	Monarch MPO	MP:0005389	Reproductive system phenotype
Dnmt3b	10090.ENSMUSP00000105396	Monarch MPO	MP:0005390	Skeleton phenotype
Dnmt3b	10090.ENSMUSP00000105396	Monarch MPO	MP:0005397	Hematopoietic system phenotype
Dnmt3b	10090.ENSMUSP00000105396	Monarch MPO	MP:0005460	Abnormal leukopoiesis
Dnmt3b	10090.ENSMUSP00000105396	Monarch MPO	MP:0005508	Abnormal skeleton morphology
Dnmt3b	10090.ENSMUSP00000105396	Monarch MPO	MP:0005566	Decreased blood urea nitrogen level
Dnmt3b	10090.ENSMUSP00000105396	Monarch MPO	MP:0005621	Abnormal cell physiology
Dnmt3b	10090.ENSMUSP00000105396	Monarch MPO	MP:0006042	Increased apoptosis
Dnmt3b	10090.ENSMUSP00000105396	Monarch MPO	MP:0006207	Embryonic lethality during organogenesis
Dnmt3b	10090.ENSMUSP00000105396	Monarch MPO	MP:0006208	Lethality throughout fetal growth and development
Dnmt3b	10090.ENSMUSP00000105396	Monarch MPO	MP:0006387	Abnormal t cell number
Dnmt3b	10090.ENSMUSP00000105396	Monarch MPO	MP:0006412	Abnormal t cell apoptosis
Dnmt3b	10090.ENSMUSP00000105396	Monarch MPO	MP:0006413	Increased t cell apoptosis
Dnmt3b	10090.ENSMUSP00000105396	Monarch MPO	MP:0008037	Abnormal t cell morphology
Dnmt3b	10090.ENSMUSP00000105396	Monarch MPO	MP:0008246	Abnormal leukocyte morphology
Dnmt3b	10090.ENSMUSP00000105396	Monarch MPO	MP:0008247	Abnormal mononuclear cell morphology
Dnmt3b	10090.ENSMUSP00000105396	Monarch MPO	MP:0008762	Embryonic lethality
Dnmt3b	10090.ENSMUSP00000105396	Monarch MPO	MP:0008877	Abnormal dna methylation
Dnmt3b	10090.ENSMUSP00000105396	Monarch MPO	MP:0009258	Abnormal thymocyte apoptosis
Dnmt3b	10090.ENSMUSP00000105396	Monarch MPO	MP:0009541	Increased thymocyte apoptosis
Dnmt3b	10090.ENSMUSP00000105396	Monarch MPO	MP:0009642	Abnormal blood homeostasis
Dnmt3b	10090.ENSMUSP00000105396	Monarch MPO	MP:0009672	Abnormal birth weight
Dnmt3b	10090.ENSMUSP00000105396	Monarch MPO	MP:0009674	Decreased birth weight
Dnmt3b	10090.ENSMUSP00000105396	Monarch MPO	MP:0009701	Abnormal birth body size
Dnmt3b	10090.ENSMUSP00000105396	Monarch MPO	MP:0009703	Decreased birth body size
Dnmt3b	10090.ENSMUSP00000105396	Monarch MPO	MP:0010768	Mortality/aging
Dnmt3b	10090.ENSMUSP00000105396	Monarch MPO	MP:0010769	Abnormal survival
Dnmt3b	10090.ENSMUSP00000105396	Monarch MPO	MP:0010770	Preweaning lethality
Dnmt3b	10090.ENSMUSP00000105396	Monarch MPO	MP:0010771	Integument phenotype
Dnmt3b	10090.ENSMUSP00000105396	Monarch MPO	MP:0010832	Lethality during fetal growth through weaning
Dnmt3b	10090.ENSMUSP00000105396	Monarch MPO	MP:0010865	Prenatal growth retardation
Dnmt3b	10090.ENSMUSP00000105396	Monarch MPO	MP:0010866	Abnormal prenatal body size
Dnmt3b	10090.ENSMUSP00000105396	Monarch MPO	MP:0011085	Postnatal lethality, complete penetrance
Dnmt3b	10090.ENSMUSP00000105396	Monarch MPO	MP:0011086	Postnatal lethality, incomplete penetrance
Dnmt3b	10090.ENSMUSP00000105396	Monarch MPO	MP:0011087	Neonatal lethality, complete penetrance
Dnmt3b	10090.ENSMUSP00000105396	Monarch MPO	MP:0011088	Neonatal lethality, incomplete penetrance
Dnmt3b	10090.ENSMUSP00000105396	Monarch MPO	MP:0011091	Prenatal lethality, complete penetrance
Dnmt3b	10090.ENSMUSP00000105396	Monarch MPO	MP:0011099	Lethality throughout fetal growth and development, complete penetrance
Dnmt3b	10090.ENSMUSP00000105396	Monarch MPO	MP:0011100	Preweaning lethality, complete penetrance
Dnmt3b	10090.ENSMUSP00000105396	Monarch MPO	MP:0011108	Embryonic lethality during organogenesis, incomplete penetrance
Dnmt3b	10090.ENSMUSP00000105396	Monarch MPO	MP:0011110	Preweaning lethality, incomplete penetrance
Dnmt3b	10090.ENSMUSP00000105396	Monarch MPO	MP:0011180	Abnormal hematopoietic cell number
Dnmt3b	10090.ENSMUSP00000105396	Monarch MPO	MP:0011181	Increased hematopoietic cell number
Dnmt3b	10090.ENSMUSP00000105396	Monarch MPO	MP:0011182	Decreased hematopoietic cell number
Dnmt3b	10090.ENSMUSP00000105396	Monarch MPO	MP:0011239	Abnormal skin coloration
Dnmt3b	10090.ENSMUSP00000105396	Monarch MPO	MP:0012167	Abnormal epigenetic regulation of gene expression
Dnmt3b	10090.ENSMUSP00000105396	Monarch MPO	MP:0012382	Abnormal blood cell physiology
Dnmt3b	10090.ENSMUSP00000105396	Monarch MPO	MP:0012542	Abnormal neuropore morphology
Dnmt3b	10090.ENSMUSP00000105396	Monarch MPO	MP:0012543	Abnormal rostral neuropore morphology
Dnmt3b	10090.ENSMUSP00000105396	Monarch MPO	MP:0012556	Increased cell death
Dnmt3b	10090.ENSMUSP00000105396	Monarch MPO	MP:0012762	Abnormal alpha-beta t cell morphology
Dnmt3b	10090.ENSMUSP00000105396	Monarch MPO	MP:0013560	Abnormal endocrine gland morphology
Dnmt3b	10090.ENSMUSP00000105396	Monarch MPO	MP:0013561	Abnormal endocrine gland physiology
Dnmt3b	10090.ENSMUSP00000105396	Monarch MPO	MP:0013656	Abnormal hematopoietic cell morphology
Dnmt3b	10090.ENSMUSP00000105396	Monarch MPO	MP:0013657	Abnormal blood cell morphology
Dnmt3b	10090.ENSMUSP00000105396	Monarch MPO	MP:0013693	Abnormal hemopoiesis
Dnmt3b	10090.ENSMUSP00000105396	Monarch MPO	MP:0014134	Abnormal embryo morphology
Dnmt3b	10090.ENSMUSP00000105396	Monarch MPO	MP:0020981	Abnormal immune system development
Dnmt3b	10090.ENSMUSP00000105396	UniProt Keywords	KW-0010	Activator
Dnmt3b	10090.ENSMUSP00000105396	UniProt Keywords	KW-0025	Alternative splicing
Dnmt3b	10090.ENSMUSP00000105396	UniProt Keywords	KW-0164	Citrullination
Dnmt3b	10090.ENSMUSP00000105396	UniProt Keywords	KW-0238	DNA-binding
Dnmt3b	10090.ENSMUSP00000105396	UniProt Keywords	KW-0479	Metal-binding
Dnmt3b	10090.ENSMUSP00000105396	UniProt Keywords	KW-0489	Methyltransferase
Dnmt3b	10090.ENSMUSP00000105396	UniProt Keywords	KW-0539	Nucleus
Dnmt3b	10090.ENSMUSP00000105396	UniProt Keywords	KW-0597	Phosphoprotein
Dnmt3b	10090.ENSMUSP00000105396	UniProt Keywords	KW-0678	Repressor
Dnmt3b	10090.ENSMUSP00000105396	UniProt Keywords	KW-0808	Transferase
Dnmt3b	10090.ENSMUSP00000105396	UniProt Keywords	KW-0832	Ubl conjugation
Dnmt3b	10090.ENSMUSP00000105396	UniProt Keywords	KW-0862	Zinc
[truncated: 11,276 more rows]

## Sheet: enrichment.all
#category	term ID	term description	observed gene count	background gene count	strength	false discovery rate	matching proteins in your network (IDs)	matching proteins in your network (labels)
GO Process	GO:0010628	Positive regulation of gene expression	24	2269	0.88	3.64e-14	10090.ENSMUSP00000002180,10090.ENSMUSP00000002487,10090.ENSMUSP00000004990,10090.ENSMUSP00000008542,10090.ENSMUSP00000009550,10090.ENSMUSP00000017868,10090.ENSMUSP00000021674,10090.ENSMUSP00000022709,10090.ENSMUSP00000023612,10090.ENSMUSP00000034534,10090.ENSMUSP00000046515,10090.ENSMUSP00000051619,10090.ENSMUSP00000056752,10090.ENSMUSP00000064680,10090.ENSMUSP00000065983,10090.ENSMUSP00000087049…	Spi1,Braf,Mapk14,Elk3,Elk1,Etv4,Fos,Spry2,Ets2,Ets1,Elf1,Mapk3,Fgf4,Junb,Mapk1,Tet3,Etv1,Map3k2,Tet2,Jun,Etv2,Dnmt3b,Elf4,Tet1
GO Process	GO:0045893	Positive regulation of transcription, dna-templated	21	1541	0.99	8.83e-14	10090.ENSMUSP00000002180,10090.ENSMUSP00000004990,10090.ENSMUSP00000008542,10090.ENSMUSP00000009550,10090.ENSMUSP00000017868,10090.ENSMUSP00000021674,10090.ENSMUSP00000023612,10090.ENSMUSP00000034534,10090.ENSMUSP00000046515,10090.ENSMUSP00000051619,10090.ENSMUSP00000056752,10090.ENSMUSP00000064680,10090.ENSMUSP00000065983,10090.ENSMUSP00000087049,10090.ENSMUSP00000093442,10090.ENSMUSP00000094326…	Spi1,Mapk14,Elk3,Elk1,Etv4,Fos,Ets2,Ets1,Elf1,Mapk3,Fgf4,Junb,Mapk1,Tet3,Etv1,Map3k2,Tet2,Jun,Etv2,Elf4,Tet1
GO Process	GO:0060255	Regulation of macromolecule metabolic process	30	5618	0.58	1.29e-13	10090.ENSMUSP00000002180,10090.ENSMUSP00000002487,10090.ENSMUSP00000004990,10090.ENSMUSP00000008542,10090.ENSMUSP00000009550,10090.ENSMUSP00000017868,10090.ENSMUSP00000020118,10090.ENSMUSP00000020991,10090.ENSMUSP00000021674,10090.ENSMUSP00000022709,10090.ENSMUSP00000023612,10090.ENSMUSP00000025295,10090.ENSMUSP00000031280,10090.ENSMUSP00000033665,10090.ENSMUSP00000033930,10090.ENSMUSP00000034534…	Spi1,Braf,Mapk14,Elk3,Elk1,Etv4,Dusp6,Dnmt3a,Fos,Spry2,Ets2,Spry4,Fgf5,Map3k15,Dusp4,Ets1,Elf1,Mapk3,Fgf4,Junb,Mapk1,Tet3,Etv1,Map3k2,Tet2,Jun,Etv2,Dnmt3b,Elf4,Tet1
GO Process	GO:0051171	Regulation of nitrogen compound metabolic process	29	5126	0.6	2.32e-13	10090.ENSMUSP00000002180,10090.ENSMUSP00000002487,10090.ENSMUSP00000004990,10090.ENSMUSP00000008542,10090.ENSMUSP00000009550,10090.ENSMUSP00000017868,10090.ENSMUSP00000020118,10090.ENSMUSP00000020991,10090.ENSMUSP00000021674,10090.ENSMUSP00000022709,10090.ENSMUSP00000023612,10090.ENSMUSP00000025295,10090.ENSMUSP00000033665,10090.ENSMUSP00000033930,10090.ENSMUSP00000034534,10090.ENSMUSP00000046515…	Spi1,Braf,Mapk14,Elk3,Elk1,Etv4,Dusp6,Dnmt3a,Fos,Spry2,Ets2,Spry4,Map3k15,Dusp4,Ets1,Elf1,Mapk3,Fgf4,Junb,Mapk1,Tet3,Etv1,Map3k2,Tet2,Jun,Etv2,Dnmt3b,Elf4,Tet1
GO Process	GO:0045944	Positive regulation of transcription by rna polymerase ii	19	1239	1.04	2.36e-13	10090.ENSMUSP00000002180,10090.ENSMUSP00000004990,10090.ENSMUSP00000008542,10090.ENSMUSP00000009550,10090.ENSMUSP00000017868,10090.ENSMUSP00000021674,10090.ENSMUSP00000023612,10090.ENSMUSP00000034534,10090.ENSMUSP00000046515,10090.ENSMUSP00000051619,10090.ENSMUSP00000056752,10090.ENSMUSP00000064680,10090.ENSMUSP00000087049,10090.ENSMUSP00000093442,10090.ENSMUSP00000096203,10090.ENSMUSP00000102711…	Spi1,Mapk14,Elk3,Elk1,Etv4,Fos,Ets2,Ets1,Elf1,Mapk3,Fgf4,Junb,Tet3,Etv1,Tet2,Jun,Etv2,Elf4,Tet1
GO Process	GO:0051173	Positive regulation of nitrogen compound metabolic process	25	3119	0.76	2.78e-13	10090.ENSMUSP00000002180,10090.ENSMUSP00000002487,10090.ENSMUSP00000004990,10090.ENSMUSP00000008542,10090.ENSMUSP00000009550,10090.ENSMUSP00000017868,10090.ENSMUSP00000021674,10090.ENSMUSP00000022709,10090.ENSMUSP00000023612,10090.ENSMUSP00000033665,10090.ENSMUSP00000034534,10090.ENSMUSP00000046515,10090.ENSMUSP00000051619,10090.ENSMUSP00000056752,10090.ENSMUSP00000064680,10090.ENSMUSP00000065983…	Spi1,Braf,Mapk14,Elk3,Elk1,Etv4,Fos,Spry2,Ets2,Map3k15,Ets1,Elf1,Mapk3,Fgf4,Junb,Mapk1,Tet3,Etv1,Map3k2,Tet2,Jun,Etv2,Dnmt3b,Elf4,Tet1
GO Process	GO:0080090	Regulation of primary metabolic process	29	5290	0.59	3.95e-13	10090.ENSMUSP00000002180,10090.ENSMUSP00000002487,10090.ENSMUSP00000004990,10090.ENSMUSP00000008542,10090.ENSMUSP00000009550,10090.ENSMUSP00000017868,10090.ENSMUSP00000020118,10090.ENSMUSP00000020991,10090.ENSMUSP00000021674,10090.ENSMUSP00000022709,10090.ENSMUSP00000023612,10090.ENSMUSP00000025295,10090.ENSMUSP00000033665,10090.ENSMUSP00000033930,10090.ENSMUSP00000034534,10090.ENSMUSP00000046515…	Spi1,Braf,Mapk14,Elk3,Elk1,Etv4,Dusp6,Dnmt3a,Fos,Spry2,Ets2,Spry4,Map3k15,Dusp4,Ets1,Elf1,Mapk3,Fgf4,Junb,Mapk1,Tet3,Etv1,Map3k2,Tet2,Jun,Etv2,Dnmt3b,Elf4,Tet1
GO Process	GO:0006357	Regulation of transcription by rna polymerase ii	21	1897	0.9	7.63e-13	10090.ENSMUSP00000002180,10090.ENSMUSP00000004990,10090.ENSMUSP00000008542,10090.ENSMUSP00000009550,10090.ENSMUSP00000017868,10090.ENSMUSP00000020991,10090.ENSMUSP00000021674,10090.ENSMUSP00000023612,10090.ENSMUSP00000034534,10090.ENSMUSP00000046515,10090.ENSMUSP00000051619,10090.ENSMUSP00000056752,10090.ENSMUSP00000064680,10090.ENSMUSP00000087049,10090.ENSMUSP00000093442,10090.ENSMUSP00000096203…	Spi1,Mapk14,Elk3,Elk1,Etv4,Dnmt3a,Fos,Ets2,Ets1,Elf1,Mapk3,Fgf4,Junb,Tet3,Etv1,Tet2,Jun,Etv2,Dnmt3b,Elf4,Tet1
GO Process	GO:0031323	Regulation of cellular metabolic process	29	5479	0.58	7.63e-13	10090.ENSMUSP00000002180,10090.ENSMUSP00000002487,10090.ENSMUSP00000004990,10090.ENSMUSP00000008542,10090.ENSMUSP00000009550,10090.ENSMUSP00000017868,10090.ENSMUSP00000020118,10090.ENSMUSP00000020991,10090.ENSMUSP00000021674,10090.ENSMUSP00000022709,10090.ENSMUSP00000023612,10090.ENSMUSP00000025295,10090.ENSMUSP00000033665,10090.ENSMUSP00000033930,10090.ENSMUSP00000034534,10090.ENSMUSP00000046515…	Spi1,Braf,Mapk14,Elk3,Elk1,Etv4,Dusp6,Dnmt3a,Fos,Spry2,Ets2,Spry4,Map3k15,Dusp4,Ets1,Elf1,Mapk3,Fgf4,Junb,Mapk1,Tet3,Etv1,Map3k2,Tet2,Jun,Etv2,Dnmt3b,Elf4,Tet1
GO Process	GO:0031325	Positive regulation of cellular metabolic process	25	3320	0.73	7.63e-13	10090.ENSMUSP00000002180,10090.ENSMUSP00000002487,10090.ENSMUSP00000004990,10090.ENSMUSP00000008542,10090.ENSMUSP00000009550,10090.ENSMUSP00000017868,10090.ENSMUSP00000021674,10090.ENSMUSP00000022709,10090.ENSMUSP00000023612,10090.ENSMUSP00000033665,10090.ENSMUSP00000034534,10090.ENSMUSP00000046515,10090.ENSMUSP00000051619,10090.ENSMUSP00000056752,10090.ENSMUSP00000064680,10090.ENSMUSP00000065983…	Spi1,Braf,Mapk14,Elk3,Elk1,Etv4,Fos,Spry2,Ets2,Map3k15,Ets1,Elf1,Mapk3,Fgf4,Junb,Mapk1,Tet3,Etv1,Map3k2,Tet2,Jun,Etv2,Dnmt3b,Elf4,Tet1
GO Process	GO:0010604	Positive regulation of macromolecule metabolic process	25	3467	0.71	1.65e-12	10090.ENSMUSP00000002180,10090.ENSMUSP00000002487,10090.ENSMUSP00000004990,10090.ENSMUSP00000008542,10090.ENSMUSP00000009550,10090.ENSMUSP00000017868,10090.ENSMUSP00000021674,10090.ENSMUSP00000022709,10090.ENSMUSP00000023612,10090.ENSMUSP00000033665,10090.ENSMUSP00000034534,10090.ENSMUSP00000046515,10090.ENSMUSP00000051619,10090.ENSMUSP00000056752,10090.ENSMUSP00000064680,10090.ENSMUSP00000065983…	Spi1,Braf,Mapk14,Elk3,Elk1,Etv4,Fos,Spry2,Ets2,Map3k15,Ets1,Elf1,Mapk3,Fgf4,Junb,Mapk1,Tet3,Etv1,Map3k2,Tet2,Jun,Etv2,Dnmt3b,Elf4,Tet1
GO Process	GO:0006355	Regulation of transcription, dna-templated	23	2720	0.78	2.52e-12	10090.ENSMUSP00000002180,10090.ENSMUSP00000004990,10090.ENSMUSP00000008542,10090.ENSMUSP00000009550,10090.ENSMUSP00000017868,10090.ENSMUSP00000020991,10090.ENSMUSP00000021674,10090.ENSMUSP00000023612,10090.ENSMUSP00000034534,10090.ENSMUSP00000046515,10090.ENSMUSP00000051619,10090.ENSMUSP00000056752,10090.ENSMUSP00000064680,10090.ENSMUSP00000065983,10090.ENSMUSP00000087049,10090.ENSMUSP00000093442…	Spi1,Mapk14,Elk3,Elk1,Etv4,Dnmt3a,Fos,Ets2,Ets1,Elf1,Mapk3,Fgf4,Junb,Mapk1,Tet3,Etv1,Map3k2,Tet2,Jun,Etv2,Dnmt3b,Elf4,Tet1
GO Process	GO:0010468	Regulation of gene expression	26	4041	0.66	2.93e-12	10090.ENSMUSP00000002180,10090.ENSMUSP00000002487,10090.ENSMUSP00000004990,10090.ENSMUSP00000008542,10090.ENSMUSP00000009550,10090.ENSMUSP00000017868,10090.ENSMUSP00000020991,10090.ENSMUSP00000021674,10090.ENSMUSP00000022709,10090.ENSMUSP00000023612,10090.ENSMUSP00000031280,10090.ENSMUSP00000034534,10090.ENSMUSP00000046515,10090.ENSMUSP00000051619,10090.ENSMUSP00000056752,10090.ENSMUSP00000064680…	Spi1,Braf,Mapk14,Elk3,Elk1,Etv4,Dnmt3a,Fos,Spry2,Ets2,Fgf5,Ets1,Elf1,Mapk3,Fgf4,Junb,Mapk1,Tet3,Etv1,Map3k2,Tet2,Jun,Etv2,Dnmt3b,Elf4,Tet1
GO Process	GO:0030154	Cell differentiation	25	3674	0.68	5.2e-12	10090.ENSMUSP00000002180,10090.ENSMUSP00000002487,10090.ENSMUSP00000004990,10090.ENSMUSP00000008542,10090.ENSMUSP00000009550,10090.ENSMUSP00000017868,10090.ENSMUSP00000020118,10090.ENSMUSP00000020991,10090.ENSMUSP00000021674,10090.ENSMUSP00000022709,10090.ENSMUSP00000023612,10090.ENSMUSP00000031280,10090.ENSMUSP00000034534,10090.ENSMUSP00000046515,10090.ENSMUSP00000051619,10090.ENSMUSP00000056752…	Spi1,Braf,Mapk14,Elk3,Elk1,Etv4,Dusp6,Dnmt3a,Fos,Spry2,Ets2,Fgf5,Ets1,Elf1,Mapk3,Fgf4,Junb,Mapk1,Etv1,Tet2,Jun,Etv2,Dnmt3b,Elf4,Tet1
GO Process	GO:0048522	Positive regulation of cellular process	28	5407	0.57	8.46e-12	10090.ENSMUSP00000002180,10090.ENSMUSP00000002487,10090.ENSMUSP00000004990,10090.ENSMUSP00000008542,10090.ENSMUSP00000009550,10090.ENSMUSP00000017868,10090.ENSMUSP00000020118,10090.ENSMUSP00000020991,10090.ENSMUSP00000021674,10090.ENSMUSP00000022709,10090.ENSMUSP00000023612,10090.ENSMUSP00000031280,10090.ENSMUSP00000033665,10090.ENSMUSP00000034534,10090.ENSMUSP00000046515,10090.ENSMUSP00000051619…	Spi1,Braf,Mapk14,Elk3,Elk1,Etv4,Dusp6,Dnmt3a,Fos,Spry2,Ets2,Fgf5,Map3k15,Ets1,Elf1,Mapk3,Fgf4,Junb,Mapk1,Tet3,Etv1,Map3k2,Tet2,Jun,Etv2,Dnmt3b,Elf4,Tet1
GO Process	GO:0065009	Regulation of molecular function	26	4379	0.63	1.61e-11	10090.ENSMUSP00000002180,10090.ENSMUSP00000002487,10090.ENSMUSP00000004990,10090.ENSMUSP00000008542,10090.ENSMUSP00000009550,10090.ENSMUSP00000017868,10090.ENSMUSP00000020118,10090.ENSMUSP00000021674,10090.ENSMUSP00000022709,10090.ENSMUSP00000023612,10090.ENSMUSP00000025295,10090.ENSMUSP00000031280,10090.ENSMUSP00000033665,10090.ENSMUSP00000033930,10090.ENSMUSP00000034534,10090.ENSMUSP00000046515…	Spi1,Braf,Mapk14,Elk3,Elk1,Etv4,Dusp6,Fos,Spry2,Ets2,Spry4,Fgf5,Map3k15,Dusp4,Ets1,Elf1,Mapk3,Fgf4,Junb,Mapk1,Etv1,Map3k2,Jun,Etv2,Dnmt3b,Elf4
GO Process	GO:0032502	Developmental process	28	5629	0.55	2.17e-11	10090.ENSMUSP00000002180,10090.ENSMUSP00000002487,10090.ENSMUSP00000004990,10090.ENSMUSP00000008542,10090.ENSMUSP00000009550,10090.ENSMUSP00000017868,10090.ENSMUSP00000020118,10090.ENSMUSP00000020991,10090.ENSMUSP00000021674,10090.ENSMUSP00000022709,10090.ENSMUSP00000023612,10090.ENSMUSP00000025295,10090.ENSMUSP00000031280,10090.ENSMUSP00000033930,10090.ENSMUSP00000034534,10090.ENSMUSP00000046515…	Spi1,Braf,Mapk14,Elk3,Elk1,Etv4,Dusp6,Dnmt3a,Fos,Spry2,Ets2,Spry4,Fgf5,Dusp4,Ets1,Elf1,Mapk3,Fgf4,Junb,Mapk1,Tet3,Etv1,Tet2,Jun,Etv2,Dnmt3b,Elf4,Tet1
GO Process	GO:0070848	Response to growth factor	12	485	1.25	4.95e-10	10090.ENSMUSP00000002487,10090.ENSMUSP00000004990,10090.ENSMUSP00000009550,10090.ENSMUSP00000020118,10090.ENSMUSP00000021674,10090.ENSMUSP00000022709,10090.ENSMUSP00000031280,10090.ENSMUSP00000051619,10090.ENSMUSP00000056752,10090.ENSMUSP00000065983,10090.ENSMUSP00000102711,10090.ENSMUSP00000103782	Braf,Mapk14,Elk1,Dusp6,Fos,Spry2,Fgf5,Mapk3,Fgf4,Mapk1,Jun,Etv2
GO Process	GO:0050794	Regulation of cellular process	31	9541	0.36	1.85e-09	10090.ENSMUSP00000002180,10090.ENSMUSP00000002487,10090.ENSMUSP00000004990,10090.ENSMUSP00000008542,10090.ENSMUSP00000009550,10090.ENSMUSP00000017868,10090.ENSMUSP00000020118,10090.ENSMUSP00000020991,10090.ENSMUSP00000021674,10090.ENSMUSP00000022709,10090.ENSMUSP00000023612,10090.ENSMUSP00000025295,10090.ENSMUSP00000031280,10090.ENSMUSP00000033665,10090.ENSMUSP00000033930,10090.ENSMUSP00000034534…	Spi1,Braf,Mapk14,Elk3,Elk1,Etv4,Dusp6,Dnmt3a,Fos,Spry2,Ets2,Spry4,Fgf5,Map3k15,Dusp4,Ets1,Il17rd,Elf1,Mapk3,Fgf4,Junb,Mapk1,Tet3,Etv1,Map3k2,Tet2,Jun,Etv2,Dnmt3b,Elf4,Tet1
GO Process	GO:0009653	Anatomical structure morphogenesis	18	2244	0.76	2.6e-08	10090.ENSMUSP00000002180,10090.ENSMUSP00000002487,10090.ENSMUSP00000004990,10090.ENSMUSP00000008542,10090.ENSMUSP00000017868,10090.ENSMUSP00000022709,10090.ENSMUSP00000023612,10090.ENSMUSP00000033930,10090.ENSMUSP00000034534,10090.ENSMUSP00000051619,10090.ENSMUSP00000056752,10090.ENSMUSP00000064680,10090.ENSMUSP00000065983,10090.ENSMUSP00000093442,10090.ENSMUSP00000096203,10090.ENSMUSP00000102711…	Spi1,Braf,Mapk14,Elk3,Etv4,Spry2,Ets2,Dusp4,Ets1,Mapk3,Fgf4,Junb,Mapk1,Etv1,Tet2,Jun,Etv2,Tet1
GO Process	GO:0007275	Multicellular organism development	24	4921	0.54	3.73e-08	10090.ENSMUSP00000002180,10090.ENSMUSP00000002487,10090.ENSMUSP00000004990,10090.ENSMUSP00000008542,10090.ENSMUSP00000017868,10090.ENSMUSP00000020991,10090.ENSMUSP00000021674,10090.ENSMUSP00000022709,10090.ENSMUSP00000023612,10090.ENSMUSP00000025295,10090.ENSMUSP00000031280,10090.ENSMUSP00000033930,10090.ENSMUSP00000034534,10090.ENSMUSP00000051619,10090.ENSMUSP00000056752,10090.ENSMUSP00000064680…	Spi1,Braf,Mapk14,Elk3,Etv4,Dnmt3a,Fos,Spry2,Ets2,Spry4,Fgf5,Dusp4,Ets1,Mapk3,Fgf4,Junb,Mapk1,Tet3,Etv1,Tet2,Jun,Etv2,Dnmt3b,Tet1
GO Process	GO:0071310	Cellular response to organic substance	17	1987	0.78	4.23e-08	10090.ENSMUSP00000002180,10090.ENSMUSP00000002487,10090.ENSMUSP00000004990,10090.ENSMUSP00000009550,10090.ENSMUSP00000020991,10090.ENSMUSP00000021674,10090.ENSMUSP00000022709,10090.ENSMUSP00000025295,10090.ENSMUSP00000031280,10090.ENSMUSP00000036076,10090.ENSMUSP00000051619,10090.ENSMUSP00000056752,10090.ENSMUSP00000064680,10090.ENSMUSP00000065983,10090.ENSMUSP00000102711,10090.ENSMUSP00000103782…	Spi1,Braf,Mapk14,Elk1,Dnmt3a,Fos,Spry2,Spry4,Fgf5,Il17rd,Mapk3,Fgf4,Junb,Mapk1,Jun,Etv2,Dnmt3b
GO Process	GO:0010033	Response to organic substance	19	2742	0.69	6.08e-08	10090.ENSMUSP00000002180,10090.ENSMUSP00000002487,10090.ENSMUSP00000004990,10090.ENSMUSP00000009550,10090.ENSMUSP00000020118,10090.ENSMUSP00000020991,10090.ENSMUSP00000021674,10090.ENSMUSP00000022709,10090.ENSMUSP00000025295,10090.ENSMUSP00000031280,10090.ENSMUSP00000034534,10090.ENSMUSP00000036076,10090.ENSMUSP00000051619,10090.ENSMUSP00000056752,10090.ENSMUSP00000064680,10090.ENSMUSP00000065983…	Spi1,Braf,Mapk14,Elk1,Dusp6,Dnmt3a,Fos,Spry2,Spry4,Fgf5,Ets1,Il17rd,Mapk3,Fgf4,Junb,Mapk1,Jun,Etv2,Dnmt3b
GO Process	GO:0043405	Regulation of map kinase activity	9	310	1.31	1.07e-07	10090.ENSMUSP00000002487,10090.ENSMUSP00000020118,10090.ENSMUSP00000022709,10090.ENSMUSP00000025295,10090.ENSMUSP00000033665,10090.ENSMUSP00000033930,10090.ENSMUSP00000051619,10090.ENSMUSP00000065983,10090.ENSMUSP00000094326	Braf,Dusp6,Spry2,Spry4,Map3k15,Dusp4,Mapk3,Mapk1,Map3k2
GO Process	GO:0042221	Response to chemical	21	3720	0.6	1.33e-07	10090.ENSMUSP00000002180,10090.ENSMUSP00000002487,10090.ENSMUSP00000004990,10090.ENSMUSP00000009550,10090.ENSMUSP00000017868,10090.ENSMUSP00000020118,10090.ENSMUSP00000020991,10090.ENSMUSP00000021674,10090.ENSMUSP00000022709,10090.ENSMUSP00000025295,10090.ENSMUSP00000031280,10090.ENSMUSP00000034534,10090.ENSMUSP00000036076,10090.ENSMUSP00000051619,10090.ENSMUSP00000056752,10090.ENSMUSP00000064680…	Spi1,Braf,Mapk14,Elk1,Etv4,Dusp6,Dnmt3a,Fos,Spry2,Spry4,Fgf5,Ets1,Il17rd,Mapk3,Fgf4,Junb,Mapk1,Etv1,Jun,Etv2,Dnmt3b
GO Process	GO:0034097	Response to cytokine	12	818	1.02	1.44e-07	10090.ENSMUSP00000002180,10090.ENSMUSP00000004990,10090.ENSMUSP00000021674,10090.ENSMUSP00000022709,10090.ENSMUSP00000025295,10090.ENSMUSP00000034534,10090.ENSMUSP00000036076,10090.ENSMUSP00000051619,10090.ENSMUSP00000056752,10090.ENSMUSP00000064680,10090.ENSMUSP00000065983,10090.ENSMUSP00000102711	Spi1,Mapk14,Fos,Spry2,Spry4,Ets1,Il17rd,Mapk3,Fgf4,Junb,Mapk1,Jun
GO Process	GO:0070887	Cellular response to chemical stimulus	18	2535	0.7	1.58e-07	10090.ENSMUSP00000002180,10090.ENSMUSP00000002487,10090.ENSMUSP00000004990,10090.ENSMUSP00000009550,10090.ENSMUSP00000020991,10090.ENSMUSP00000021674,10090.ENSMUSP00000022709,10090.ENSMUSP00000025295,10090.ENSMUSP00000031280,10090.ENSMUSP00000034534,10090.ENSMUSP00000036076,10090.ENSMUSP00000051619,10090.ENSMUSP00000056752,10090.ENSMUSP00000064680,10090.ENSMUSP00000065983,10090.ENSMUSP00000102711…	Spi1,Braf,Mapk14,Elk1,Dnmt3a,Fos,Spry2,Spry4,Fgf5,Ets1,Il17rd,Mapk3,Fgf4,Junb,Mapk1,Jun,Etv2,Dnmt3b
GO Process	GO:0043408	Regulation of mapk cascade	11	723	1.03	6.05e-07	10090.ENSMUSP00000002487,10090.ENSMUSP00000020118,10090.ENSMUSP00000022709,10090.ENSMUSP00000025295,10090.ENSMUSP00000033665,10090.ENSMUSP00000033930,10090.ENSMUSP00000051619,10090.ENSMUSP00000056752,10090.ENSMUSP00000065983,10090.ENSMUSP00000094326,10090.ENSMUSP00000102711	Braf,Dusp6,Spry2,Spry4,Map3k15,Dusp4,Mapk3,Fgf4,Mapk1,Map3k2,Jun
GO Process	GO:0048731	System development	21	4350	0.54	2.28e-06	10090.ENSMUSP00000002180,10090.ENSMUSP00000002487,10090.ENSMUSP00000004990,10090.ENSMUSP00000008542,10090.ENSMUSP00000017868,10090.ENSMUSP00000020991,10090.ENSMUSP00000021674,10090.ENSMUSP00000022709,10090.ENSMUSP00000025295,10090.ENSMUSP00000031280,10090.ENSMUSP00000034534,10090.ENSMUSP00000051619,10090.ENSMUSP00000056752,10090.ENSMUSP00000064680,10090.ENSMUSP00000065983,10090.ENSMUSP00000093442…	Spi1,Braf,Mapk14,Elk3,Etv4,Dnmt3a,Fos,Spry2,Spry4,Fgf5,Ets1,Mapk3,Fgf4,Junb,Mapk1,Etv1,Tet2,Jun,Etv2,Dnmt3b,Tet1
GO Process	GO:0070372	Regulation of erk1 and erk2 cascade	8	311	1.26	2.55e-06	10090.ENSMUSP00000002487,10090.ENSMUSP00000020118,10090.ENSMUSP00000022709,10090.ENSMUSP00000025295,10090.ENSMUSP00000033930,10090.ENSMUSP00000051619,10090.ENSMUSP00000056752,10090.ENSMUSP00000102711	Braf,Dusp6,Spry2,Spry4,Dusp4,Mapk3,Fgf4,Jun
GO Process	GO:0071363	Cellular response to growth factor stimulus	9	459	1.14	2.59e-06	10090.ENSMUSP00000002487,10090.ENSMUSP00000004990,10090.ENSMUSP00000021674,10090.ENSMUSP00000022709,10090.ENSMUSP00000031280,10090.ENSMUSP00000051619,10090.ENSMUSP00000056752,10090.ENSMUSP00000102711,10090.ENSMUSP00000103782	Braf,Mapk14,Fos,Spry2,Fgf5,Mapk3,Fgf4,Jun,Etv2
GO Process	GO:0050896	Response to stimulus	25	6908	0.41	5.19e-06	10090.ENSMUSP00000002180,10090.ENSMUSP00000002487,10090.ENSMUSP00000004990,10090.ENSMUSP00000008542,10090.ENSMUSP00000009550,10090.ENSMUSP00000017868,10090.ENSMUSP00000020118,10090.ENSMUSP00000020991,10090.ENSMUSP00000021674,10090.ENSMUSP00000022709,10090.ENSMUSP00000025295,10090.ENSMUSP00000031280,10090.ENSMUSP00000033665,10090.ENSMUSP00000034534,10090.ENSMUSP00000036076,10090.ENSMUSP00000051619…	Spi1,Braf,Mapk14,Elk3,Elk1,Etv4,Dusp6,Dnmt3a,Fos,Spry2,Spry4,Fgf5,Map3k15,Ets1,Il17rd,Mapk3,Fgf4,Junb,Mapk1,Etv1,Map3k2,Jun,Etv2,Dnmt3b,Elf4
GO Process	GO:0006351	Transcription, dna-templated	8	350	1.21	5.67e-06	10090.ENSMUSP00000002180,10090.ENSMUSP00000021674,10090.ENSMUSP00000034534,10090.ENSMUSP00000051619,10090.ENSMUSP00000064680,10090.ENSMUSP00000065983,10090.ENSMUSP00000093442,10090.ENSMUSP00000102711	Spi1,Fos,Ets1,Mapk3,Junb,Mapk1,Etv1,Jun
GO Process	GO:0009612	Response to mechanical stimulus	7	222	1.35	5.67e-06	10090.ENSMUSP00000004990,10090.ENSMUSP00000021674,10090.ENSMUSP00000034534,10090.ENSMUSP00000051619,10090.ENSMUSP00000064680,10090.ENSMUSP00000093442,10090.ENSMUSP00000102711	Mapk14,Fos,Ets1,Mapk3,Junb,Etv1,Jun
GO Process	GO:0044728	DNA methylation or demethylation	5	58	1.79	5.67e-06	10090.ENSMUSP00000020991,10090.ENSMUSP00000087049,10090.ENSMUSP00000096203,10090.ENSMUSP00000105396,10090.ENSMUSP00000133279	Dnmt3a,Tet3,Tet2,Dnmt3b,Tet1
GO Process	GO:0009790	Embryo development	12	1165	0.86	5.78e-06	10090.ENSMUSP00000020991,10090.ENSMUSP00000022709,10090.ENSMUSP00000023612,10090.ENSMUSP00000033930,10090.ENSMUSP00000051619,10090.ENSMUSP00000056752,10090.ENSMUSP00000064680,10090.ENSMUSP00000065983,10090.ENSMUSP00000087049,10090.ENSMUSP00000103782,10090.ENSMUSP00000105396,10090.ENSMUSP00000133279	Dnmt3a,Spry2,Ets2,Dusp4,Mapk3,Fgf4,Junb,Mapk1,Tet3,Etv2,Dnmt3b,Tet1
GO Process	GO:0048646	Anatomical structure formation involved in morphogenesis	11	952	0.91	7.97e-06	10090.ENSMUSP00000004990,10090.ENSMUSP00000008542,10090.ENSMUSP00000023612,10090.ENSMUSP00000033930,10090.ENSMUSP00000034534,10090.ENSMUSP00000051619,10090.ENSMUSP00000064680,10090.ENSMUSP00000065983,10090.ENSMUSP00000102711,10090.ENSMUSP00000103782,10090.ENSMUSP00000133279	Mapk14,Elk3,Ets2,Dusp4,Ets1,Mapk3,Junb,Mapk1,Jun,Etv2,Tet1
GO Process	GO:0035295	Tube development	11	961	0.91	8.63e-06	10090.ENSMUSP00000002180,10090.ENSMUSP00000004990,10090.ENSMUSP00000008542,10090.ENSMUSP00000017868,10090.ENSMUSP00000022709,10090.ENSMUSP00000034534,10090.ENSMUSP00000051619,10090.ENSMUSP00000064680,10090.ENSMUSP00000065983,10090.ENSMUSP00000102711,10090.ENSMUSP00000103782	Spi1,Mapk14,Elk3,Etv4,Spry2,Ets1,Mapk3,Junb,Mapk1,Jun,Etv2
GO Process	GO:0006211	5-methylcytosine catabolic process	3	3	2.85	9.91e-06	10090.ENSMUSP00000087049,10090.ENSMUSP00000096203,10090.ENSMUSP00000133279	Tet3,Tet2,Tet1
GO Process	GO:0007167	Enzyme linked receptor protein signaling pathway	9	558	1.06	1.07e-05	10090.ENSMUSP00000002487,10090.ENSMUSP00000004990,10090.ENSMUSP00000021674,10090.ENSMUSP00000031280,10090.ENSMUSP00000051619,10090.ENSMUSP00000056752,10090.ENSMUSP00000065983,10090.ENSMUSP00000102711,10090.ENSMUSP00000103782	Braf,Mapk14,Fos,Fgf5,Mapk3,Fgf4,Mapk1,Jun,Etv2
GO Process	GO:0031399	Regulation of protein modification process	14	1856	0.73	1.18e-05	10090.ENSMUSP00000002180,10090.ENSMUSP00000002487,10090.ENSMUSP00000020118,10090.ENSMUSP00000022709,10090.ENSMUSP00000025295,10090.ENSMUSP00000033665,10090.ENSMUSP00000033930,10090.ENSMUSP00000051619,10090.ENSMUSP00000056752,10090.ENSMUSP00000065983,10090.ENSMUSP00000094326,10090.ENSMUSP00000102711,10090.ENSMUSP00000105396,10090.ENSMUSP00000133279	Spi1,Braf,Dusp6,Spry2,Spry4,Map3k15,Dusp4,Mapk3,Fgf4,Mapk1,Map3k2,Jun,Dnmt3b,Tet1
GO Process	GO:0071495	Cellular response to endogenous stimulus	11	1075	0.86	2.44e-05	10090.ENSMUSP00000002487,10090.ENSMUSP00000020991,10090.ENSMUSP00000021674,10090.ENSMUSP00000031280,10090.ENSMUSP00000051619,10090.ENSMUSP00000056752,10090.ENSMUSP00000064680,10090.ENSMUSP00000065983,10090.ENSMUSP00000102711,10090.ENSMUSP00000103782,10090.ENSMUSP00000105396	Braf,Dnmt3a,Fos,Fgf5,Mapk3,Fgf4,Junb,Mapk1,Jun,Etv2,Dnmt3b
GO Process	GO:0000165	MAPK cascade	6	169	1.4	2.58e-05	10090.ENSMUSP00000002487,10090.ENSMUSP00000004990,10090.ENSMUSP00000033665,10090.ENSMUSP00000051619,10090.ENSMUSP00000065983,10090.ENSMUSP00000094326	Braf,Mapk14,Map3k15,Mapk3,Mapk1,Map3k2
GO Process	GO:0071276	Cellular response to cadmium ion	4	30	1.98	2.58e-05	10090.ENSMUSP00000021674,10090.ENSMUSP00000051619,10090.ENSMUSP00000065983,10090.ENSMUSP00000102711	Fos,Mapk3,Mapk1,Jun
GO Process	GO:0009719	Response to endogenous stimulus	12	1370	0.79	2.82e-05	10090.ENSMUSP00000002487,10090.ENSMUSP00000009550,10090.ENSMUSP00000020991,10090.ENSMUSP00000021674,10090.ENSMUSP00000031280,10090.ENSMUSP00000051619,10090.ENSMUSP00000056752,10090.ENSMUSP00000064680,10090.ENSMUSP00000065983,10090.ENSMUSP00000102711,10090.ENSMUSP00000103782,10090.ENSMUSP00000105396	Braf,Elk1,Dnmt3a,Fos,Fgf5,Mapk3,Fgf4,Junb,Mapk1,Jun,Etv2,Dnmt3b
GO Process	GO:0009987	Cellular process	31	13330	0.22	2.97e-05	10090.ENSMUSP00000002180,10090.ENSMUSP00000002487,10090.ENSMUSP00000004990,10090.ENSMUSP00000008542,10090.ENSMUSP00000009550,10090.ENSMUSP00000017868,10090.ENSMUSP00000020118,10090.ENSMUSP00000020991,10090.ENSMUSP00000021674,10090.ENSMUSP00000022709,10090.ENSMUSP00000023612,10090.ENSMUSP00000025295,10090.ENSMUSP00000031280,10090.ENSMUSP00000033665,10090.ENSMUSP00000033930,10090.ENSMUSP00000034534…	Spi1,Braf,Mapk14,Elk3,Elk1,Etv4,Dusp6,Dnmt3a,Fos,Spry2,Ets2,Spry4,Fgf5,Map3k15,Dusp4,Ets1,Il17rd,Elf1,Mapk3,Fgf4,Junb,Mapk1,Tet3,Etv1,Map3k2,Tet2,Jun,Etv2,Dnmt3b,Elf4,Tet1
GO Process	GO:0044260	Cellular macromolecule metabolic process	19	4161	0.51	4.09e-05	10090.ENSMUSP00000002180,10090.ENSMUSP00000002487,10090.ENSMUSP00000004990,10090.ENSMUSP00000020118,10090.ENSMUSP00000020991,10090.ENSMUSP00000021674,10090.ENSMUSP00000033665,10090.ENSMUSP00000033930,10090.ENSMUSP00000034534,10090.ENSMUSP00000051619,10090.ENSMUSP00000064680,10090.ENSMUSP00000065983,10090.ENSMUSP00000087049,10090.ENSMUSP00000093442,10090.ENSMUSP00000094326,10090.ENSMUSP00000096203…	Spi1,Braf,Mapk14,Dusp6,Dnmt3a,Fos,Map3k15,Dusp4,Ets1,Mapk3,Junb,Mapk1,Tet3,Etv1,Map3k2,Tet2,Jun,Dnmt3b,Tet1
GO Process	GO:0048523	Negative regulation of cellular process	20	4672	0.48	4.15e-05	10090.ENSMUSP00000002180,10090.ENSMUSP00000002487,10090.ENSMUSP00000004990,10090.ENSMUSP00000008542,10090.ENSMUSP00000017868,10090.ENSMUSP00000020118,10090.ENSMUSP00000020991,10090.ENSMUSP00000022709,10090.ENSMUSP00000023612,10090.ENSMUSP00000025295,10090.ENSMUSP00000033930,10090.ENSMUSP00000034534,10090.ENSMUSP00000036076,10090.ENSMUSP00000046515,10090.ENSMUSP00000056752,10090.ENSMUSP00000064680…	Spi1,Braf,Mapk14,Elk3,Etv4,Dusp6,Dnmt3a,Spry2,Ets2,Spry4,Dusp4,Ets1,Il17rd,Elf1,Fgf4,Junb,Mapk1,Jun,Dnmt3b,Tet1
GO Process	GO:0090304	Nucleic acid metabolic process	13	1777	0.72	5.31e-05	10090.ENSMUSP00000002180,10090.ENSMUSP00000020991,10090.ENSMUSP00000021674,10090.ENSMUSP00000034534,10090.ENSMUSP00000051619,10090.ENSMUSP00000064680,10090.ENSMUSP00000065983,10090.ENSMUSP00000087049,10090.ENSMUSP00000093442,10090.ENSMUSP00000096203,10090.ENSMUSP00000102711,10090.ENSMUSP00000105396,10090.ENSMUSP00000133279	Spi1,Dnmt3a,Fos,Ets1,Mapk3,Junb,Mapk1,Tet3,Etv1,Tet2,Jun,Dnmt3b,Tet1
GO Process	GO:0071248	Cellular response to metal ion	6	196	1.34	5.41e-05	10090.ENSMUSP00000002487,10090.ENSMUSP00000021674,10090.ENSMUSP00000051619,10090.ENSMUSP00000064680,10090.ENSMUSP00000065983,10090.ENSMUSP00000102711	Braf,Fos,Mapk3,Junb,Mapk1,Jun
GO Process	GO:0048534	Hematopoietic or lymphoid organ development	9	695	0.96	5.6e-05	10090.ENSMUSP00000002180,10090.ENSMUSP00000002487,10090.ENSMUSP00000004990,10090.ENSMUSP00000051619,10090.ENSMUSP00000064680,10090.ENSMUSP00000065983,10090.ENSMUSP00000096203,10090.ENSMUSP00000102711,10090.ENSMUSP00000103782	Spi1,Braf,Mapk14,Mapk3,Junb,Mapk1,Tet2,Jun,Etv2
GO Process	GO:0014070	Response to organic cyclic compound	10	930	0.88	5.82e-05	10090.ENSMUSP00000002487,10090.ENSMUSP00000009550,10090.ENSMUSP00000020118,10090.ENSMUSP00000020991,10090.ENSMUSP00000021674,10090.ENSMUSP00000034534,10090.ENSMUSP00000051619,10090.ENSMUSP00000064680,10090.ENSMUSP00000065983,10090.ENSMUSP00000102711	Braf,Elk1,Dusp6,Dnmt3a,Fos,Ets1,Mapk3,Junb,Mapk1,Jun
GO Process	GO:0006366	Transcription by rna polymerase ii	6	200	1.33	5.84e-05	10090.ENSMUSP00000002180,10090.ENSMUSP00000021674,10090.ENSMUSP00000034534,10090.ENSMUSP00000064680,10090.ENSMUSP00000093442,10090.ENSMUSP00000102711	Spi1,Fos,Ets1,Junb,Etv1,Jun
GO Process	GO:0035511	Oxidative dna demethylation	3	8	2.43	6.37e-05	10090.ENSMUSP00000087049,10090.ENSMUSP00000096203,10090.ENSMUSP00000133279	Tet3,Tet2,Tet1
GO Process	GO:0043045	DNA methylation involved in embryo development	3	8	2.43	6.37e-05	10090.ENSMUSP00000020991,10090.ENSMUSP00000087049,10090.ENSMUSP00000105396	Dnmt3a,Tet3,Dnmt3b
GO Process	GO:0035239	Tube morphogenesis	9	728	0.94	7.57e-05	10090.ENSMUSP00000002180,10090.ENSMUSP00000004990,10090.ENSMUSP00000008542,10090.ENSMUSP00000017868,10090.ENSMUSP00000022709,10090.ENSMUSP00000034534,10090.ENSMUSP00000064680,10090.ENSMUSP00000102711,10090.ENSMUSP00000103782	Spi1,Mapk14,Elk3,Etv4,Spry2,Ets1,Junb,Jun,Etv2
GO Process	GO:0034645	Cellular macromolecule biosynthetic process	11	1233	0.8	7.58e-05	10090.ENSMUSP00000002180,10090.ENSMUSP00000021674,10090.ENSMUSP00000034534,10090.ENSMUSP00000051619,10090.ENSMUSP00000064680,10090.ENSMUSP00000065983,10090.ENSMUSP00000087049,10090.ENSMUSP00000093442,10090.ENSMUSP00000096203,10090.ENSMUSP00000102711,10090.ENSMUSP00000133279	Spi1,Fos,Ets1,Mapk3,Junb,Mapk1,Tet3,Etv1,Tet2,Jun,Tet1
GO Process	GO:0043410	Positive regulation of mapk cascade	8	531	1.03	8.34e-05	10090.ENSMUSP00000002487,10090.ENSMUSP00000022709,10090.ENSMUSP00000033665,10090.ENSMUSP00000051619,10090.ENSMUSP00000056752,10090.ENSMUSP00000065983,10090.ENSMUSP00000094326,10090.ENSMUSP00000102711	Braf,Spry2,Map3k15,Mapk3,Fgf4,Mapk1,Map3k2,Jun
GO Process	GO:0001568	Blood vessel development	8	534	1.03	8.6e-05	10090.ENSMUSP00000002180,10090.ENSMUSP00000004990,10090.ENSMUSP00000008542,10090.ENSMUSP00000034534,10090.ENSMUSP00000064680,10090.ENSMUSP00000065983,10090.ENSMUSP00000102711,10090.ENSMUSP00000103782	Spi1,Mapk14,Elk3,Ets1,Junb,Mapk1,Jun,Etv2
GO Process	GO:0032268	Regulation of cellular protein metabolic process	15	2657	0.6	0.0001	10090.ENSMUSP00000002180,10090.ENSMUSP00000002487,10090.ENSMUSP00000004990,10090.ENSMUSP00000020118,10090.ENSMUSP00000022709,10090.ENSMUSP00000025295,10090.ENSMUSP00000033665,10090.ENSMUSP00000033930,10090.ENSMUSP00000051619,10090.ENSMUSP00000056752,10090.ENSMUSP00000065983,10090.ENSMUSP00000094326,10090.ENSMUSP00000102711,10090.ENSMUSP00000105396,10090.ENSMUSP00000133279	Spi1,Braf,Mapk14,Dusp6,Spry2,Spry4,Map3k15,Dusp4,Mapk3,Fgf4,Mapk1,Map3k2,Jun,Dnmt3b,Tet1
GO Process	GO:1901700	Response to oxygen-containing compound	12	1585	0.73	0.0001	10090.ENSMUSP00000002180,10090.ENSMUSP00000002487,10090.ENSMUSP00000004990,10090.ENSMUSP00000009550,10090.ENSMUSP00000020991,10090.ENSMUSP00000021674,10090.ENSMUSP00000034534,10090.ENSMUSP00000051619,10090.ENSMUSP00000064680,10090.ENSMUSP00000065983,10090.ENSMUSP00000102711,10090.ENSMUSP00000105396	Spi1,Braf,Mapk14,Elk1,Dnmt3a,Fos,Ets1,Mapk3,Junb,Mapk1,Jun,Dnmt3b
GO Process	GO:0010035	Response to inorganic substance	8	556	1.01	0.00011	10090.ENSMUSP00000002487,10090.ENSMUSP00000020991,10090.ENSMUSP00000021674,10090.ENSMUSP00000034534,10090.ENSMUSP00000051619,10090.ENSMUSP00000064680,10090.ENSMUSP00000065983,10090.ENSMUSP00000102711	Braf,Dnmt3a,Fos,Ets1,Mapk3,Junb,Mapk1,Jun
GO Process	GO:0010038	Response to metal ion	7	374	1.12	0.00011	10090.ENSMUSP00000002487,10090.ENSMUSP00000020991,10090.ENSMUSP00000021674,10090.ENSMUSP00000051619,10090.ENSMUSP00000064680,10090.ENSMUSP00000065983,10090.ENSMUSP00000102711	Braf,Dnmt3a,Fos,Mapk3,Junb,Mapk1,Jun
GO Process	GO:1901701	Cellular response to oxygen-containing compound	10	1026	0.84	0.00012	10090.ENSMUSP00000002180,10090.ENSMUSP00000004990,10090.ENSMUSP00000009550,10090.ENSMUSP00000020991,10090.ENSMUSP00000021674,10090.ENSMUSP00000034534,10090.ENSMUSP00000051619,10090.ENSMUSP00000065983,10090.ENSMUSP00000102711,10090.ENSMUSP00000105396	Spi1,Mapk14,Elk1,Dnmt3a,Fos,Ets1,Mapk3,Mapk1,Jun,Dnmt3b
GO Process	GO:0030099	Myeloid cell differentiation	6	247	1.24	0.00016	10090.ENSMUSP00000002180,10090.ENSMUSP00000004990,10090.ENSMUSP00000064680,10090.ENSMUSP00000096203,10090.ENSMUSP00000102711,10090.ENSMUSP00000103782	Spi1,Mapk14,Junb,Tet2,Jun,Etv2
GO Process	GO:0051239	Regulation of multicellular organismal process	16	3205	0.55	0.00017	10090.ENSMUSP00000002180,10090.ENSMUSP00000002487,10090.ENSMUSP00000004990,10090.ENSMUSP00000017868,10090.ENSMUSP00000020118,10090.ENSMUSP00000021674,10090.ENSMUSP00000022709,10090.ENSMUSP00000034534,10090.ENSMUSP00000036076,10090.ENSMUSP00000046515,10090.ENSMUSP00000051619,10090.ENSMUSP00000056752,10090.ENSMUSP00000065983,10090.ENSMUSP00000102711,10090.ENSMUSP00000103782,10090.ENSMUSP00000105396	Spi1,Braf,Mapk14,Etv4,Dusp6,Fos,Spry2,Ets1,Il17rd,Elf1,Mapk3,Fgf4,Mapk1,Jun,Etv2,Dnmt3b
GO Process	GO:0072527	Pyrimidine-containing compound metabolic process	4	55	1.71	0.00017	10090.ENSMUSP00000065983,10090.ENSMUSP00000087049,10090.ENSMUSP00000096203,10090.ENSMUSP00000133279	Mapk1,Tet3,Tet2,Tet1
GO Process	GO:0034614	Cellular response to reactive oxygen species	5	136	1.42	0.00018	10090.ENSMUSP00000021674,10090.ENSMUSP00000034534,10090.ENSMUSP00000051619,10090.ENSMUSP00000065983,10090.ENSMUSP00000102711	Fos,Ets1,Mapk3,Mapk1,Jun
GO Process	GO:0048513	Animal organ development	16	3230	0.55	0.00018	10090.ENSMUSP00000002180,10090.ENSMUSP00000002487,10090.ENSMUSP00000004990,10090.ENSMUSP00000017868,10090.ENSMUSP00000021674,10090.ENSMUSP00000022709,10090.ENSMUSP00000025295,10090.ENSMUSP00000034534,10090.ENSMUSP00000051619,10090.ENSMUSP00000056752,10090.ENSMUSP00000064680,10090.ENSMUSP00000065983,10090.ENSMUSP00000093442,10090.ENSMUSP00000096203,10090.ENSMUSP00000102711,10090.ENSMUSP00000103782	Spi1,Braf,Mapk14,Etv4,Fos,Spry2,Spry4,Ets1,Mapk3,Fgf4,Junb,Mapk1,Etv1,Tet2,Jun,Etv2
GO Process	GO:0009888	Tissue development	12	1720	0.7	0.00021	10090.ENSMUSP00000004990,10090.ENSMUSP00000017868,10090.ENSMUSP00000021674,10090.ENSMUSP00000022709,10090.ENSMUSP00000023612,10090.ENSMUSP00000033930,10090.ENSMUSP00000051619,10090.ENSMUSP00000056752,10090.ENSMUSP00000064680,10090.ENSMUSP00000065983,10090.ENSMUSP00000102711,10090.ENSMUSP00000103782	Mapk14,Etv4,Fos,Spry2,Ets2,Dusp4,Mapk3,Fgf4,Junb,Mapk1,Jun,Etv2
GO Process	GO:0009628	Response to abiotic stimulus	10	1126	0.8	0.00024	10090.ENSMUSP00000002487,10090.ENSMUSP00000004990,10090.ENSMUSP00000009550,10090.ENSMUSP00000020991,10090.ENSMUSP00000021674,10090.ENSMUSP00000034534,10090.ENSMUSP00000051619,10090.ENSMUSP00000064680,10090.ENSMUSP00000093442,10090.ENSMUSP00000102711	Braf,Mapk14,Elk1,Dnmt3a,Fos,Ets1,Mapk3,Junb,Etv1,Jun
GO Process	GO:0048514	Blood vessel morphogenesis	7	433	1.06	0.00024	10090.ENSMUSP00000002180,10090.ENSMUSP00000004990,10090.ENSMUSP00000008542,10090.ENSMUSP00000034534,10090.ENSMUSP00000064680,10090.ENSMUSP00000102711,10090.ENSMUSP00000103782	Spi1,Mapk14,Elk3,Ets1,Junb,Jun,Etv2
GO Process	GO:0033993	Response to lipid	9	872	0.87	0.00026	10090.ENSMUSP00000004990,10090.ENSMUSP00000009550,10090.ENSMUSP00000020991,10090.ENSMUSP00000021674,10090.ENSMUSP00000034534,10090.ENSMUSP00000051619,10090.ENSMUSP00000064680,10090.ENSMUSP00000065983,10090.ENSMUSP00000102711	Mapk14,Elk1,Dnmt3a,Fos,Ets1,Mapk3,Junb,Mapk1,Jun
GO Process	GO:0009314	Response to radiation	7	444	1.05	0.00027	10090.ENSMUSP00000002487,10090.ENSMUSP00000004990,10090.ENSMUSP00000009550,10090.ENSMUSP00000020991,10090.ENSMUSP00000021674,10090.ENSMUSP00000064680,10090.ENSMUSP00000102711	Braf,Mapk14,Elk1,Dnmt3a,Fos,Junb,Jun
GO Process	GO:0007568	Aging	6	287	1.17	0.00031	10090.ENSMUSP00000004990,10090.ENSMUSP00000020991,10090.ENSMUSP00000021674,10090.ENSMUSP00000051619,10090.ENSMUSP00000065983,10090.ENSMUSP00000102711	Mapk14,Dnmt3a,Fos,Mapk3,Mapk1,Jun
GO Process	GO:2000026	Regulation of multicellular organismal development	13	2150	0.63	0.00031	10090.ENSMUSP00000002180,10090.ENSMUSP00000002487,10090.ENSMUSP00000004990,10090.ENSMUSP00000017868,10090.ENSMUSP00000020118,10090.ENSMUSP00000021674,10090.ENSMUSP00000022709,10090.ENSMUSP00000034534,10090.ENSMUSP00000036076,10090.ENSMUSP00000065983,10090.ENSMUSP00000102711,10090.ENSMUSP00000103782,10090.ENSMUSP00000105396	Spi1,Braf,Mapk14,Etv4,Dusp6,Fos,Spry2,Ets1,Il17rd,Mapk1,Jun,Etv2,Dnmt3b
GO Process	GO:0043407	Negative regulation of map kinase activity	4	71	1.6	0.00039	10090.ENSMUSP00000020118,10090.ENSMUSP00000022709,10090.ENSMUSP00000025295,10090.ENSMUSP00000033930	Dusp6,Spry2,Spry4,Dusp4
GO Process	GO:0051716	Cellular response to stimulus	20	5497	0.41	0.0004	10090.ENSMUSP00000002180,10090.ENSMUSP00000002487,10090.ENSMUSP00000004990,10090.ENSMUSP00000009550,10090.ENSMUSP00000020991,10090.ENSMUSP00000021674,10090.ENSMUSP00000022709,10090.ENSMUSP00000025295,10090.ENSMUSP00000031280,10090.ENSMUSP00000033665,10090.ENSMUSP00000034534,10090.ENSMUSP00000036076,10090.ENSMUSP00000051619,10090.ENSMUSP00000056752,10090.ENSMUSP00000064680,10090.ENSMUSP00000065983…	Spi1,Braf,Mapk14,Elk1,Dnmt3a,Fos,Spry2,Spry4,Fgf5,Map3k15,Ets1,Il17rd,Mapk3,Fgf4,Junb,Mapk1,Map3k2,Jun,Etv2,Dnmt3b
GO Process	GO:0072359	Circulatory system development	9	936	0.83	0.00041	10090.ENSMUSP00000002180,10090.ENSMUSP00000004990,10090.ENSMUSP00000008542,10090.ENSMUSP00000034534,10090.ENSMUSP00000051619,10090.ENSMUSP00000064680,10090.ENSMUSP00000065983,10090.ENSMUSP00000102711,10090.ENSMUSP00000103782	Spi1,Mapk14,Elk3,Ets1,Mapk3,Junb,Mapk1,Jun,Etv2
GO Process	GO:0045595	Regulation of cell differentiation	12	1868	0.66	0.00044	10090.ENSMUSP00000002180,10090.ENSMUSP00000002487,10090.ENSMUSP00000004990,10090.ENSMUSP00000021674,10090.ENSMUSP00000022709,10090.ENSMUSP00000034534,10090.ENSMUSP00000036076,10090.ENSMUSP00000064680,10090.ENSMUSP00000065983,10090.ENSMUSP00000102711,10090.ENSMUSP00000103782,10090.ENSMUSP00000105396	Spi1,Braf,Mapk14,Fos,Spry2,Ets1,Il17rd,Junb,Mapk1,Jun,Etv2,Dnmt3b
GO Process	GO:0071345	Cellular response to cytokine stimulus	8	698	0.91	0.00044	10090.ENSMUSP00000002180,10090.ENSMUSP00000004990,10090.ENSMUSP00000022709,10090.ENSMUSP00000025295,10090.ENSMUSP00000036076,10090.ENSMUSP00000051619,10090.ENSMUSP00000056752,10090.ENSMUSP00000065983	Spi1,Mapk14,Spry2,Spry4,Il17rd,Mapk3,Fgf4,Mapk1
GO Process	GO:0070373	Negative regulation of erk1 and erk2 cascade	4	76	1.57	0.00047	10090.ENSMUSP00000020118,10090.ENSMUSP00000022709,10090.ENSMUSP00000025295,10090.ENSMUSP00000033930	Dusp6,Spry2,Spry4,Dusp4
GO Process	GO:0048732	Gland development	7	493	1	0.00048	10090.ENSMUSP00000002487,10090.ENSMUSP00000017868,10090.ENSMUSP00000034534,10090.ENSMUSP00000051619,10090.ENSMUSP00000065983,10090.ENSMUSP00000096203,10090.ENSMUSP00000102711	Braf,Etv4,Ets1,Mapk3,Mapk1,Tet2,Jun
GO Process	GO:0031401	Positive regulation of protein modification process	10	1243	0.76	0.00049	10090.ENSMUSP00000002487,10090.ENSMUSP00000022709,10090.ENSMUSP00000033665,10090.ENSMUSP00000051619,10090.ENSMUSP00000056752,10090.ENSMUSP00000065983,10090.ENSMUSP00000094326,10090.ENSMUSP00000102711,10090.ENSMUSP00000105396,10090.ENSMUSP00000133279	Braf,Spry2,Map3k15,Mapk3,Fgf4,Mapk1,Map3k2,Jun,Dnmt3b,Tet1
GO Process	GO:0035994	Response to muscle stretch	3	21	2.01	0.00049	10090.ENSMUSP00000004990,10090.ENSMUSP00000021674,10090.ENSMUSP00000102711	Mapk14,Fos,Jun
GO Process	GO:0050793	Regulation of developmental process	14	2669	0.57	0.0005	10090.ENSMUSP00000002180,10090.ENSMUSP00000002487,10090.ENSMUSP00000004990,10090.ENSMUSP00000017868,10090.ENSMUSP00000020118,10090.ENSMUSP00000021674,10090.ENSMUSP00000022709,10090.ENSMUSP00000034534,10090.ENSMUSP00000036076,10090.ENSMUSP00000064680,10090.ENSMUSP00000065983,10090.ENSMUSP00000102711,10090.ENSMUSP00000103782,10090.ENSMUSP00000105396	Spi1,Braf,Mapk14,Etv4,Dusp6,Fos,Spry2,Ets1,Il17rd,Junb,Mapk1,Jun,Etv2,Dnmt3b
GO Process	GO:0032147	Activation of protein kinase activity	6	321	1.12	0.00051	10090.ENSMUSP00000002487,10090.ENSMUSP00000022709,10090.ENSMUSP00000033665,10090.ENSMUSP00000051619,10090.ENSMUSP00000065983,10090.ENSMUSP00000094326	Braf,Spry2,Map3k15,Mapk3,Mapk1,Map3k2
GO Process	GO:0032496	Response to lipopolysaccharide	6	320	1.13	0.00051	10090.ENSMUSP00000004990,10090.ENSMUSP00000021674,10090.ENSMUSP00000051619,10090.ENSMUSP00000064680,10090.ENSMUSP00000065983,10090.ENSMUSP00000102711	Mapk14,Fos,Mapk3,Junb,Mapk1,Jun
GO Process	GO:0071902	Positive regulation of protein serine/threonine kinase activity	6	321	1.12	0.00051	10090.ENSMUSP00000002487,10090.ENSMUSP00000022709,10090.ENSMUSP00000033665,10090.ENSMUSP00000051619,10090.ENSMUSP00000065983,10090.ENSMUSP00000094326	Braf,Spry2,Map3k15,Mapk3,Mapk1,Map3k2
GO Process	GO:0010243	Response to organonitrogen compound	9	975	0.82	0.00052	10090.ENSMUSP00000002487,10090.ENSMUSP00000004990,10090.ENSMUSP00000020991,10090.ENSMUSP00000021674,10090.ENSMUSP00000051619,10090.ENSMUSP00000064680,10090.ENSMUSP00000065983,10090.ENSMUSP00000102711,10090.ENSMUSP00000105396	Braf,Mapk14,Dnmt3a,Fos,Mapk3,Junb,Mapk1,Jun,Dnmt3b
GO Process	GO:0001890	Placenta development	5	182	1.29	0.00054	10090.ENSMUSP00000004990,10090.ENSMUSP00000051619,10090.ENSMUSP00000064680,10090.ENSMUSP00000065983,10090.ENSMUSP00000103782	Mapk14,Mapk3,Junb,Mapk1,Etv2
GO Process	GO:0043412	Macromolecule modification	14	2700	0.57	0.00055	10090.ENSMUSP00000002180,10090.ENSMUSP00000002487,10090.ENSMUSP00000004990,10090.ENSMUSP00000020118,10090.ENSMUSP00000020991,10090.ENSMUSP00000033665,10090.ENSMUSP00000033930,10090.ENSMUSP00000051619,10090.ENSMUSP00000065983,10090.ENSMUSP00000087049,10090.ENSMUSP00000094326,10090.ENSMUSP00000096203,10090.ENSMUSP00000105396,10090.ENSMUSP00000133279	Spi1,Braf,Mapk14,Dusp6,Dnmt3a,Map3k15,Dusp4,Mapk3,Mapk1,Tet3,Map3k2,Tet2,Dnmt3b,Tet1
GO Process	GO:0032270	Positive regulation of cellular protein metabolic process	11	1600	0.69	0.00059	10090.ENSMUSP00000002487,10090.ENSMUSP00000004990,10090.ENSMUSP00000022709,10090.ENSMUSP00000033665,10090.ENSMUSP00000051619,10090.ENSMUSP00000056752,10090.ENSMUSP00000065983,10090.ENSMUSP00000094326,10090.ENSMUSP00000102711,10090.ENSMUSP00000105396,10090.ENSMUSP00000133279	Braf,Mapk14,Spry2,Map3k15,Mapk3,Fgf4,Mapk1,Map3k2,Jun,Dnmt3b,Tet1
GO Process	GO:0007178	Transmembrane receptor protein serine/threonine kinase signaling pathway	5	188	1.28	0.00062	10090.ENSMUSP00000004990,10090.ENSMUSP00000021674,10090.ENSMUSP00000051619,10090.ENSMUSP00000102711,10090.ENSMUSP00000103782	Mapk14,Fos,Mapk3,Jun,Etv2
GO Process	GO:0071277	Cellular response to calcium ion	4	86	1.52	0.00066	10090.ENSMUSP00000002487,10090.ENSMUSP00000021674,10090.ENSMUSP00000064680,10090.ENSMUSP00000102711	Braf,Fos,Junb,Jun
GO Process	GO:0009966	Regulation of signal transduction	14	2767	0.56	0.00069	10090.ENSMUSP00000002487,10090.ENSMUSP00000004990,10090.ENSMUSP00000020118,10090.ENSMUSP00000022709,10090.ENSMUSP00000025295,10090.ENSMUSP00000033665,10090.ENSMUSP00000033930,10090.ENSMUSP00000036076,10090.ENSMUSP00000046515,10090.ENSMUSP00000051619,10090.ENSMUSP00000056752,10090.ENSMUSP00000065983,10090.ENSMUSP00000094326,10090.ENSMUSP00000102711	Braf,Mapk14,Dusp6,Spry2,Spry4,Map3k15,Dusp4,Il17rd,Elf1,Mapk3,Fgf4,Mapk1,Map3k2,Jun
GO Process	GO:0030878	Thyroid gland development	3	25	1.93	0.00069	10090.ENSMUSP00000002487,10090.ENSMUSP00000051619,10090.ENSMUSP00000065983	Braf,Mapk3,Mapk1
GO Process	GO:0007565	Female pregnancy	5	196	1.26	0.00072	10090.ENSMUSP00000021674,10090.ENSMUSP00000034534,10090.ENSMUSP00000051619,10090.ENSMUSP00000064680,10090.ENSMUSP00000065983	Fos,Ets1,Mapk3,Junb,Mapk1
GO Process	GO:0042127	Regulation of cell population proliferation	11	1650	0.68	0.00074	10090.ENSMUSP00000002487,10090.ENSMUSP00000004990,10090.ENSMUSP00000017868,10090.ENSMUSP00000022709,10090.ENSMUSP00000031280,10090.ENSMUSP00000034534,10090.ENSMUSP00000056752,10090.ENSMUSP00000064680,10090.ENSMUSP00000065983,10090.ENSMUSP00000102711,10090.ENSMUSP00000133279	Braf,Mapk14,Etv4,Spry2,Fgf5,Ets1,Fgf4,Junb,Mapk1,Jun,Tet1
GO Process	GO:0044030	Regulation of dna methylation	3	27	1.9	0.00084	10090.ENSMUSP00000002180,10090.ENSMUSP00000020991,10090.ENSMUSP00000133279	Spi1,Dnmt3a,Tet1
GO Process	GO:0019858	Cytosine metabolic process	2	2	2.85	0.00093	10090.ENSMUSP00000065983,10090.ENSMUSP00000096203	Mapk1,Tet2
GO Process	GO:0051591	Response to camp	4	96	1.47	0.00093	10090.ENSMUSP00000002487,10090.ENSMUSP00000021674,10090.ENSMUSP00000064680,10090.ENSMUSP00000102711	Braf,Fos,Junb,Jun
GO Process	GO:0045637	Regulation of myeloid cell differentiation	5	211	1.23	0.00095	10090.ENSMUSP00000002180,10090.ENSMUSP00000004990,10090.ENSMUSP00000021674,10090.ENSMUSP00000034534,10090.ENSMUSP00000102711	Spi1,Mapk14,Fos,Ets1,Jun
GO Process	GO:0046697	Decidualization	3	29	1.87	0.00096	10090.ENSMUSP00000051619,10090.ENSMUSP00000064680,10090.ENSMUSP00000065983	Mapk3,Junb,Mapk1
GO Process	GO:0007166	Cell surface receptor signaling pathway	11	1741	0.65	0.0011	10090.ENSMUSP00000002180,10090.ENSMUSP00000002487,10090.ENSMUSP00000004990,10090.ENSMUSP00000021674,10090.ENSMUSP00000031280,10090.ENSMUSP00000036076,10090.ENSMUSP00000051619,10090.ENSMUSP00000056752,10090.ENSMUSP00000065983,10090.ENSMUSP00000102711,10090.ENSMUSP00000103782	Spi1,Braf,Mapk14,Fos,Fgf5,Il17rd,Mapk3,Fgf4,Mapk1,Jun,Etv2
GO Process	GO:0070374	Positive regulation of erk1 and erk2 cascade	5	219	1.21	0.0011	10090.ENSMUSP00000002487,10090.ENSMUSP00000022709,10090.ENSMUSP00000051619,10090.ENSMUSP00000056752,10090.ENSMUSP00000102711	Braf,Spry2,Mapk3,Fgf4,Jun
GO Process	GO:0045639	Positive regulation of myeloid cell differentiation	4	106	1.43	0.0013	10090.ENSMUSP00000004990,10090.ENSMUSP00000021674,10090.ENSMUSP00000034534,10090.ENSMUSP00000102711	Mapk14,Fos,Ets1,Jun
GO Process	GO:0031400	Negative regulation of protein modification process	7	608	0.91	0.0014	10090.ENSMUSP00000002180,10090.ENSMUSP00000020118,10090.ENSMUSP00000022709,10090.ENSMUSP00000025295,10090.ENSMUSP00000033930,10090.ENSMUSP00000102711,10090.ENSMUSP00000105396	Spi1,Dusp6,Spry2,Spry4,Dusp4,Jun,Dnmt3b
GO Process	GO:0031663	Lipopolysaccharide-mediated signaling pathway	3	35	1.79	0.0015	10090.ENSMUSP00000004990,10090.ENSMUSP00000051619,10090.ENSMUSP00000065983	Mapk14,Mapk3,Mapk1
GO Process	GO:0043406	Positive regulation of map kinase activity	5	236	1.18	0.0015	10090.ENSMUSP00000002487,10090.ENSMUSP00000033665,10090.ENSMUSP00000051619,10090.ENSMUSP00000065983,10090.ENSMUSP00000094326	Braf,Map3k15,Mapk3,Mapk1,Map3k2
GO Process	GO:1903706	Regulation of hemopoiesis	6	403	1.02	0.0015	10090.ENSMUSP00000002180,10090.ENSMUSP00000002487,10090.ENSMUSP00000004990,10090.ENSMUSP00000021674,10090.ENSMUSP00000034534,10090.ENSMUSP00000102711	Spi1,Braf,Mapk14,Fos,Ets1,Jun
GO Process	GO:0002376	Immune system process	11	1842	0.63	0.0018	10090.ENSMUSP00000002180,10090.ENSMUSP00000002487,10090.ENSMUSP00000004990,10090.ENSMUSP00000034534,10090.ENSMUSP00000051619,10090.ENSMUSP00000064680,10090.ENSMUSP00000065983,10090.ENSMUSP00000096203,10090.ENSMUSP00000102711,10090.ENSMUSP00000103782,10090.ENSMUSP00000110608	Spi1,Braf,Mapk14,Ets1,Mapk3,Junb,Mapk1,Tet2,Jun,Etv2,Elf4
GO Process	GO:0030097	Hemopoiesis	7	637	0.89	0.0018	10090.ENSMUSP00000002180,10090.ENSMUSP00000002487,10090.ENSMUSP00000004990,10090.ENSMUSP00000064680,10090.ENSMUSP00000096203,10090.ENSMUSP00000102711,10090.ENSMUSP00000103782	Spi1,Braf,Mapk14,Junb,Tet2,Jun,Etv2
GO Process	GO:0048598	Embryonic morphogenesis	7	637	0.89	0.0018	10090.ENSMUSP00000022709,10090.ENSMUSP00000023612,10090.ENSMUSP00000033930,10090.ENSMUSP00000051619,10090.ENSMUSP00000056752,10090.ENSMUSP00000065983,10090.ENSMUSP00000103782	Spry2,Ets2,Dusp4,Mapk3,Fgf4,Mapk1,Etv2
GO Process	GO:0031098	Stress-activated protein kinase signaling cascade	4	121	1.37	0.002	10090.ENSMUSP00000004990,10090.ENSMUSP00000051619,10090.ENSMUSP00000065983,10090.ENSMUSP00000094326	Mapk14,Mapk3,Mapk1,Map3k2
GO Process	GO:0044027	Hypermethylation of cpg island	2	4	2.55	0.002	10090.ENSMUSP00000002180,10090.ENSMUSP00000020991	Spi1,Dnmt3a
GO Process	GO:0090170	Regulation of golgi inheritance	2	4	2.55	0.002	10090.ENSMUSP00000051619,10090.ENSMUSP00000065983	Mapk3,Mapk1
GO Process	GO:1902895	Positive regulation of pri-mirna transcription by rna polymerase ii	3	39	1.74	0.002	10090.ENSMUSP00000002180,10090.ENSMUSP00000021674,10090.ENSMUSP00000102711	Spi1,Fos,Jun
GO Process	GO:0002573	Myeloid leukocyte differentiation	4	124	1.36	0.0021	10090.ENSMUSP00000002180,10090.ENSMUSP00000004990,10090.ENSMUSP00000064680,10090.ENSMUSP00000102711	Spi1,Mapk14,Junb,Jun
GO Process	GO:0030334	Regulation of cell migration	8	915	0.79	0.0021	10090.ENSMUSP00000002487,10090.ENSMUSP00000004990,10090.ENSMUSP00000022709,10090.ENSMUSP00000034534,10090.ENSMUSP00000051619,10090.ENSMUSP00000056752,10090.ENSMUSP00000065983,10090.ENSMUSP00000102711	Braf,Mapk14,Spry2,Ets1,Mapk3,Fgf4,Mapk1,Jun
GO Process	GO:0002682	Regulation of immune system process	9	1252	0.71	0.0027	10090.ENSMUSP00000002180,10090.ENSMUSP00000002487,10090.ENSMUSP00000004990,10090.ENSMUSP00000021674,10090.ENSMUSP00000034534,10090.ENSMUSP00000046515,10090.ENSMUSP00000051619,10090.ENSMUSP00000065983,10090.ENSMUSP00000102711	Spi1,Braf,Mapk14,Fos,Ets1,Elf1,Mapk3,Mapk1,Jun
GO Process	GO:0048583	Regulation of response to stimulus	15	3651	0.47	0.0027	10090.ENSMUSP00000002487,10090.ENSMUSP00000004990,10090.ENSMUSP00000020118,10090.ENSMUSP00000022709,10090.ENSMUSP00000025295,10090.ENSMUSP00000033665,10090.ENSMUSP00000033930,10090.ENSMUSP00000034534,10090.ENSMUSP00000036076,10090.ENSMUSP00000046515,10090.ENSMUSP00000051619,10090.ENSMUSP00000056752,10090.ENSMUSP00000065983,10090.ENSMUSP00000094326,10090.ENSMUSP00000102711	Braf,Mapk14,Dusp6,Spry2,Spry4,Map3k15,Dusp4,Ets1,Il17rd,Elf1,Mapk3,Fgf4,Mapk1,Map3k2,Jun
GO Process	GO:0072584	Caveolin-mediated endocytosis	2	5	2.45	0.0027	10090.ENSMUSP00000051619,10090.ENSMUSP00000065983	Mapk3,Mapk1
GO Process	GO:0007399	Nervous system development	12	2358	0.56	0.0029	10090.ENSMUSP00000002487,10090.ENSMUSP00000017868,10090.ENSMUSP00000020991,10090.ENSMUSP00000021674,10090.ENSMUSP00000031280,10090.ENSMUSP00000034534,10090.ENSMUSP00000051619,10090.ENSMUSP00000065983,10090.ENSMUSP00000093442,10090.ENSMUSP00000102711,10090.ENSMUSP00000105396,10090.ENSMUSP00000133279	Braf,Etv4,Dnmt3a,Fos,Fgf5,Ets1,Mapk3,Mapk1,Etv1,Jun,Dnmt3b,Tet1
GO Process	GO:0019827	Stem cell population maintenance	4	138	1.31	0.0029	10090.ENSMUSP00000002180,10090.ENSMUSP00000002487,10090.ENSMUSP00000056752,10090.ENSMUSP00000133279	Spi1,Braf,Fgf4,Tet1
GO Process	GO:0035270	Endocrine system development	4	141	1.3	0.0031	10090.ENSMUSP00000002487,10090.ENSMUSP00000034534,10090.ENSMUSP00000051619,10090.ENSMUSP00000065983	Braf,Ets1,Mapk3,Mapk1
GO Process	GO:0006807	Nitrogen compound metabolic process	19	5878	0.36	0.0034	10090.ENSMUSP00000002180,10090.ENSMUSP00000002487,10090.ENSMUSP00000004990,10090.ENSMUSP00000020118,10090.ENSMUSP00000020991,10090.ENSMUSP00000021674,10090.ENSMUSP00000033665,10090.ENSMUSP00000033930,10090.ENSMUSP00000034534,10090.ENSMUSP00000051619,10090.ENSMUSP00000064680,10090.ENSMUSP00000065983,10090.ENSMUSP00000087049,10090.ENSMUSP00000093442,10090.ENSMUSP00000094326,10090.ENSMUSP00000096203…	Spi1,Braf,Mapk14,Dusp6,Dnmt3a,Fos,Map3k15,Dusp4,Ets1,Mapk3,Junb,Mapk1,Tet3,Etv1,Map3k2,Tet2,Jun,Dnmt3b,Tet1
GO Process	GO:0045646	Regulation of erythrocyte differentiation	3	50	1.63	0.0035	10090.ENSMUSP00000002180,10090.ENSMUSP00000004990,10090.ENSMUSP00000034534	Spi1,Mapk14,Ets1
GO Process	GO:0002318	Myeloid progenitor cell differentiation	2	7	2.31	0.0041	10090.ENSMUSP00000002487,10090.ENSMUSP00000096203	Braf,Tet2
GO Process	GO:0060440	Trachea formation	2	7	2.31	0.0041	10090.ENSMUSP00000051619,10090.ENSMUSP00000065983	Mapk3,Mapk1
GO Process	GO:0009887	Animal organ morphogenesis	8	1038	0.74	0.0043	10090.ENSMUSP00000004990,10090.ENSMUSP00000017868,10090.ENSMUSP00000022709,10090.ENSMUSP00000051619,10090.ENSMUSP00000056752,10090.ENSMUSP00000065983,10090.ENSMUSP00000096203,10090.ENSMUSP00000102711	Mapk14,Etv4,Spry2,Mapk3,Fgf4,Mapk1,Tet2,Jun
GO Process	GO:0048538	Thymus development	3	57	1.57	0.0047	10090.ENSMUSP00000002487,10090.ENSMUSP00000051619,10090.ENSMUSP00000065983	Braf,Mapk3,Mapk1
GO Process	GO:0031056	Regulation of histone modification	4	164	1.24	0.005	10090.ENSMUSP00000002180,10090.ENSMUSP00000051619,10090.ENSMUSP00000105396,10090.ENSMUSP00000133279	Spi1,Mapk3,Dnmt3b,Tet1
GO Process	GO:0060425	Lung morphogenesis	3	58	1.57	0.005	10090.ENSMUSP00000022709,10090.ENSMUSP00000051619,10090.ENSMUSP00000065983	Spry2,Mapk3,Mapk1
GO Process	GO:0061614	pri-miRNA transcription by RNA polymerase II	2	8	2.25	0.005	10090.ENSMUSP00000002180,10090.ENSMUSP00000034534	Spi1,Ets1
GO Process	GO:0006464	Cellular protein modification process	12	2524	0.53	0.0051	10090.ENSMUSP00000002180,10090.ENSMUSP00000002487,10090.ENSMUSP00000004990,10090.ENSMUSP00000020118,10090.ENSMUSP00000033665,10090.ENSMUSP00000033930,10090.ENSMUSP00000051619,10090.ENSMUSP00000065983,10090.ENSMUSP00000087049,10090.ENSMUSP00000094326,10090.ENSMUSP00000096203,10090.ENSMUSP00000133279	Spi1,Braf,Mapk14,Dusp6,Map3k15,Dusp4,Mapk3,Mapk1,Tet3,Map3k2,Tet2,Tet1
GO Process	GO:0060324	Face development	3	60	1.55	0.0053	10090.ENSMUSP00000002487,10090.ENSMUSP00000051619,10090.ENSMUSP00000065983	Braf,Mapk3,Mapk1
GO Process	GO:0042493	Response to drug	5	331	1.03	0.0055	10090.ENSMUSP00000002487,10090.ENSMUSP00000020118,10090.ENSMUSP00000021674,10090.ENSMUSP00000064680,10090.ENSMUSP00000102711	Braf,Dusp6,Fos,Junb,Jun
GO Process	GO:0006346	DNA methylation-dependent heterochromatin assembly	2	9	2.2	0.0058	10090.ENSMUSP00000020991,10090.ENSMUSP00000105396	Dnmt3a,Dnmt3b
GO Process	GO:0042473	Outer ear morphogenesis	2	9	2.2	0.0058	10090.ENSMUSP00000051619,10090.ENSMUSP00000065983	Mapk3,Mapk1
GO Process	GO:1905050	Positive regulation of metallopeptidase activity	2	9	2.2	0.0058	10090.ENSMUSP00000004990,10090.ENSMUSP00000051619	Mapk14,Mapk3
GO Process	GO:0022008	Neurogenesis	10	1784	0.6	0.0061	10090.ENSMUSP00000002487,10090.ENSMUSP00000017868,10090.ENSMUSP00000020991,10090.ENSMUSP00000031280,10090.ENSMUSP00000051619,10090.ENSMUSP00000065983,10090.ENSMUSP00000093442,10090.ENSMUSP00000102711,10090.ENSMUSP00000105396,10090.ENSMUSP00000133279	Braf,Etv4,Dnmt3a,Fgf5,Mapk3,Mapk1,Etv1,Jun,Dnmt3b,Tet1
GO Process	GO:0045597	Positive regulation of cell differentiation	8	1103	0.71	0.0061	10090.ENSMUSP00000002487,10090.ENSMUSP00000004990,10090.ENSMUSP00000021674,10090.ENSMUSP00000034534,10090.ENSMUSP00000064680,10090.ENSMUSP00000102711,10090.ENSMUSP00000103782,10090.ENSMUSP00000105396	Braf,Mapk14,Fos,Ets1,Junb,Jun,Etv2,Dnmt3b
GO Process	GO:1905268	Negative regulation of chromatin organization	3	64	1.52	0.0061	10090.ENSMUSP00000002180,10090.ENSMUSP00000105396,10090.ENSMUSP00000133279	Spi1,Dnmt3b,Tet1
GO Process	GO:0002684	Positive regulation of immune system process	7	815	0.79	0.0063	10090.ENSMUSP00000002487,10090.ENSMUSP00000004990,10090.ENSMUSP00000021674,10090.ENSMUSP00000034534,10090.ENSMUSP00000051619,10090.ENSMUSP00000065983,10090.ENSMUSP00000102711	Braf,Mapk14,Fos,Ets1,Mapk3,Mapk1,Jun
GO Process	GO:0006915	Apoptotic process	7	825	0.78	0.0067	10090.ENSMUSP00000002180,10090.ENSMUSP00000004990,10090.ENSMUSP00000020991,10090.ENSMUSP00000051619,10090.ENSMUSP00000056752,10090.ENSMUSP00000065983,10090.ENSMUSP00000102711	Spi1,Mapk14,Dnmt3a,Mapk3,Fgf4,Mapk1,Jun
GO Process	GO:0009605	Response to external stimulus	11	2199	0.55	0.0067	10090.ENSMUSP00000004990,10090.ENSMUSP00000017868,10090.ENSMUSP00000020991,10090.ENSMUSP00000021674,10090.ENSMUSP00000034534,10090.ENSMUSP00000051619,10090.ENSMUSP00000064680,10090.ENSMUSP00000065983,10090.ENSMUSP00000093442,10090.ENSMUSP00000102711,10090.ENSMUSP00000110608	Mapk14,Etv4,Dnmt3a,Fos,Ets1,Mapk3,Junb,Mapk1,Etv1,Jun,Elf4
GO Process	GO:0030335	Positive regulation of cell migration	6	567	0.88	0.0067	10090.ENSMUSP00000004990,10090.ENSMUSP00000022709,10090.ENSMUSP00000034534,10090.ENSMUSP00000051619,10090.ENSMUSP00000065983,10090.ENSMUSP00000102711	Mapk14,Spry2,Ets1,Mapk3,Mapk1,Jun
GO Process	GO:0050790	Regulation of catalytic activity	11	2202	0.55	0.0067	10090.ENSMUSP00000002487,10090.ENSMUSP00000004990,10090.ENSMUSP00000020118,10090.ENSMUSP00000022709,10090.ENSMUSP00000025295,10090.ENSMUSP00000033665,10090.ENSMUSP00000033930,10090.ENSMUSP00000051619,10090.ENSMUSP00000065983,10090.ENSMUSP00000094326,10090.ENSMUSP00000102711	Braf,Mapk14,Dusp6,Spry2,Spry4,Map3k15,Dusp4,Mapk3,Mapk1,Map3k2,Jun
GO Process	GO:0061308	Cardiac neural crest cell development involved in heart development	2	10	2.15	0.0067	10090.ENSMUSP00000051619,10090.ENSMUSP00000065983	Mapk3,Mapk1
GO Process	GO:0016569	Covalent chromatin modification	5	353	1	0.0068	10090.ENSMUSP00000002180,10090.ENSMUSP00000020991,10090.ENSMUSP00000087049,10090.ENSMUSP00000096203,10090.ENSMUSP00000105396	Spi1,Dnmt3a,Tet3,Tet2,Dnmt3b
GO Process	GO:0010605	Negative regulation of macromolecule metabolic process	12	2646	0.51	0.0073	10090.ENSMUSP00000002180,10090.ENSMUSP00000008542,10090.ENSMUSP00000020118,10090.ENSMUSP00000020991,10090.ENSMUSP00000022709,10090.ENSMUSP00000023612,10090.ENSMUSP00000025295,10090.ENSMUSP00000033930,10090.ENSMUSP00000064680,10090.ENSMUSP00000102711,10090.ENSMUSP00000105396,10090.ENSMUSP00000133279	Spi1,Elk3,Dusp6,Dnmt3a,Spry2,Ets2,Spry4,Dusp4,Junb,Jun,Dnmt3b,Tet1
GO Process	GO:0002521	Leukocyte differentiation	5	362	0.99	0.0076	10090.ENSMUSP00000002180,10090.ENSMUSP00000002487,10090.ENSMUSP00000004990,10090.ENSMUSP00000064680,10090.ENSMUSP00000102711	Spi1,Braf,Mapk14,Junb,Jun
GO Process	GO:0033044	Regulation of chromosome organization	5	363	0.99	0.0076	10090.ENSMUSP00000002180,10090.ENSMUSP00000051619,10090.ENSMUSP00000065983,10090.ENSMUSP00000105396,10090.ENSMUSP00000133279	Spi1,Mapk3,Mapk1,Dnmt3b,Tet1
GO Process	GO:0060020	Bergmann glial cell differentiation	2	11	2.11	0.0076	10090.ENSMUSP00000051619,10090.ENSMUSP00000065983	Mapk3,Mapk1
GO Process	GO:0007169	Transmembrane receptor protein tyrosine kinase signaling pathway	5	364	0.99	0.0077	10090.ENSMUSP00000002487,10090.ENSMUSP00000004990,10090.ENSMUSP00000031280,10090.ENSMUSP00000056752,10090.ENSMUSP00000065983	Braf,Mapk14,Fgf5,Fgf4,Mapk1
GO Process	GO:0051052	Regulation of dna metabolic process	5	365	0.99	0.0077	10090.ENSMUSP00000002180,10090.ENSMUSP00000020991,10090.ENSMUSP00000051619,10090.ENSMUSP00000065983,10090.ENSMUSP00000133279	Spi1,Dnmt3a,Mapk3,Mapk1,Tet1
GO Process	GO:0033554	Cellular response to stress	9	1493	0.63	0.0078	10090.ENSMUSP00000002487,10090.ENSMUSP00000004990,10090.ENSMUSP00000020991,10090.ENSMUSP00000021674,10090.ENSMUSP00000034534,10090.ENSMUSP00000051619,10090.ENSMUSP00000065983,10090.ENSMUSP00000094326,10090.ENSMUSP00000102711	Braf,Mapk14,Dnmt3a,Fos,Ets1,Mapk3,Mapk1,Map3k2,Jun
GO Process	GO:2001252	Positive regulation of chromosome organization	4	192	1.17	0.0078	10090.ENSMUSP00000051619,10090.ENSMUSP00000065983,10090.ENSMUSP00000105396,10090.ENSMUSP00000133279	Mapk3,Mapk1,Dnmt3b,Tet1
GO Process	GO:0006493	Protein o-linked glycosylation	3	73	1.47	0.0081	10090.ENSMUSP00000087049,10090.ENSMUSP00000096203,10090.ENSMUSP00000133279	Tet3,Tet2,Tet1
GO Process	GO:0044238	Primary metabolic process	19	6369	0.33	0.0086	10090.ENSMUSP00000002180,10090.ENSMUSP00000002487,10090.ENSMUSP00000004990,10090.ENSMUSP00000020118,10090.ENSMUSP00000020991,10090.ENSMUSP00000021674,10090.ENSMUSP00000033665,10090.ENSMUSP00000033930,10090.ENSMUSP00000034534,10090.ENSMUSP00000051619,10090.ENSMUSP00000064680,10090.ENSMUSP00000065983,10090.ENSMUSP00000087049,10090.ENSMUSP00000093442,10090.ENSMUSP00000094326,10090.ENSMUSP00000096203…	Spi1,Braf,Mapk14,Dusp6,Dnmt3a,Fos,Map3k15,Dusp4,Ets1,Mapk3,Junb,Mapk1,Tet3,Etv1,Map3k2,Tet2,Jun,Dnmt3b,Tet1
GO Process	GO:0071774	Response to fibroblast growth factor	3	76	1.45	0.0089	10090.ENSMUSP00000009550,10090.ENSMUSP00000031280,10090.ENSMUSP00000056752	Elk1,Fgf5,Fgf4
GO Process	GO:0000122	Negative regulation of transcription by rna polymerase ii	7	881	0.75	0.009	10090.ENSMUSP00000002180,10090.ENSMUSP00000008542,10090.ENSMUSP00000020991,10090.ENSMUSP00000023612,10090.ENSMUSP00000064680,10090.ENSMUSP00000102711,10090.ENSMUSP00000105396	Spi1,Elk3,Dnmt3a,Ets2,Junb,Jun,Dnmt3b
GO Process	GO:0051094	Positive regulation of developmental process	9	1533	0.62	0.0091	10090.ENSMUSP00000002487,10090.ENSMUSP00000004990,10090.ENSMUSP00000021674,10090.ENSMUSP00000034534,10090.ENSMUSP00000064680,10090.ENSMUSP00000065983,10090.ENSMUSP00000102711,10090.ENSMUSP00000103782,10090.ENSMUSP00000105396	Braf,Mapk14,Fos,Ets1,Junb,Mapk1,Jun,Etv2,Dnmt3b
GO Process	GO:0051172	Negative regulation of nitrogen compound metabolic process	11	2310	0.53	0.0093	10090.ENSMUSP00000002180,10090.ENSMUSP00000008542,10090.ENSMUSP00000020118,10090.ENSMUSP00000020991,10090.ENSMUSP00000022709,10090.ENSMUSP00000023612,10090.ENSMUSP00000025295,10090.ENSMUSP00000033930,10090.ENSMUSP00000064680,10090.ENSMUSP00000102711,10090.ENSMUSP00000105396	Spi1,Elk3,Dusp6,Dnmt3a,Spry2,Ets2,Spry4,Dusp4,Junb,Jun,Dnmt3b
GO Process	GO:0051403	Stress-activated mapk cascade	3	79	1.43	0.0098	10090.ENSMUSP00000004990,10090.ENSMUSP00000051619,10090.ENSMUSP00000065983	Mapk14,Mapk3,Mapk1
GO Process	GO:0006325	Chromatin organization	6	625	0.83	0.0101	10090.ENSMUSP00000002180,10090.ENSMUSP00000020991,10090.ENSMUSP00000087049,10090.ENSMUSP00000096203,10090.ENSMUSP00000105396,10090.ENSMUSP00000133279	Spi1,Dnmt3a,Tet3,Tet2,Dnmt3b,Tet1
GO Process	GO:0060420	Regulation of heart growth	3	80	1.43	0.0101	10090.ENSMUSP00000004990,10090.ENSMUSP00000020118,10090.ENSMUSP00000065983	Mapk14,Dusp6,Mapk1
GO Process	GO:0001933	Negative regulation of protein phosphorylation	5	420	0.93	0.0131	10090.ENSMUSP00000020118,10090.ENSMUSP00000022709,10090.ENSMUSP00000025295,10090.ENSMUSP00000033930,10090.ENSMUSP00000102711	Dusp6,Spry2,Spry4,Dusp4,Jun
GO Process	GO:0008284	Positive regulation of cell population proliferation	7	964	0.71	0.0144	10090.ENSMUSP00000004990,10090.ENSMUSP00000031280,10090.ENSMUSP00000034534,10090.ENSMUSP00000056752,10090.ENSMUSP00000065983,10090.ENSMUSP00000102711,10090.ENSMUSP00000133279	Mapk14,Fgf5,Ets1,Fgf4,Mapk1,Jun,Tet1
GO Process	GO:0071361	Cellular response to ethanol	2	17	1.92	0.0144	10090.ENSMUSP00000002180,10090.ENSMUSP00000020991	Spi1,Dnmt3a
GO Process	GO:1904355	Positive regulation of telomere capping	2	17	1.92	0.0144	10090.ENSMUSP00000051619,10090.ENSMUSP00000065983	Mapk3,Mapk1
GO Process	GO:0043414	Macromolecule methylation	4	236	1.08	0.0151	10090.ENSMUSP00000020991,10090.ENSMUSP00000087049,10090.ENSMUSP00000096203,10090.ENSMUSP00000105396	Dnmt3a,Tet3,Tet2,Dnmt3b
GO Process	GO:0010941	Regulation of cell death	9	1661	0.59	0.0153	10090.ENSMUSP00000002487,10090.ENSMUSP00000009550,10090.ENSMUSP00000020118,10090.ENSMUSP00000020991,10090.ENSMUSP00000021674,10090.ENSMUSP00000022709,10090.ENSMUSP00000034534,10090.ENSMUSP00000056752,10090.ENSMUSP00000102711	Braf,Elk1,Dusp6,Dnmt3a,Fos,Spry2,Ets1,Fgf4,Jun
GO Process	GO:0031668	Cellular response to extracellular stimulus	4	238	1.08	0.0154	10090.ENSMUSP00000021674,10090.ENSMUSP00000051619,10090.ENSMUSP00000065983,10090.ENSMUSP00000102711	Fos,Mapk3,Mapk1,Jun
GO Process	GO:0006349	Regulation of gene expression by genetic imprinting	2	18	1.9	0.0156	10090.ENSMUSP00000020991,10090.ENSMUSP00000105396	Dnmt3a,Dnmt3b
GO Process	GO:0060561	Apoptotic process involved in morphogenesis	2	18	1.9	0.0156	10090.ENSMUSP00000002180,10090.ENSMUSP00000056752	Spi1,Fgf4
GO Process	GO:2000641	Regulation of early endosome to late endosome transport	2	18	1.9	0.0156	10090.ENSMUSP00000051619,10090.ENSMUSP00000065983	Mapk3,Mapk1
GO Process	GO:0010648	Negative regulation of cell communication	8	1322	0.63	0.0166	10090.ENSMUSP00000002487,10090.ENSMUSP00000004990,10090.ENSMUSP00000020118,10090.ENSMUSP00000022709,10090.ENSMUSP00000025295,10090.ENSMUSP00000033930,10090.ENSMUSP00000036076,10090.ENSMUSP00000046515	Braf,Mapk14,Dusp6,Spry2,Spry4,Dusp4,Il17rd,Elf1
GO Process	GO:0031324	Negative regulation of cellular metabolic process	11	2497	0.5	0.0166	10090.ENSMUSP00000002180,10090.ENSMUSP00000008542,10090.ENSMUSP00000020118,10090.ENSMUSP00000020991,10090.ENSMUSP00000022709,10090.ENSMUSP00000023612,10090.ENSMUSP00000025295,10090.ENSMUSP00000033930,10090.ENSMUSP00000064680,10090.ENSMUSP00000102711,10090.ENSMUSP00000105396	Spi1,Elk3,Dusp6,Dnmt3a,Spry2,Ets2,Spry4,Dusp4,Junb,Jun,Dnmt3b
GO Process	GO:0048584	Positive regulation of response to stimulus	10	2080	0.53	0.0167	10090.ENSMUSP00000002487,10090.ENSMUSP00000004990,10090.ENSMUSP00000022709,10090.ENSMUSP00000033665,10090.ENSMUSP00000034534,10090.ENSMUSP00000051619,10090.ENSMUSP00000056752,10090.ENSMUSP00000065983,10090.ENSMUSP00000094326,10090.ENSMUSP00000102711	Braf,Mapk14,Spry2,Map3k15,Ets1,Mapk3,Fgf4,Mapk1,Map3k2,Jun
GO Process	GO:0023057	Negative regulation of signaling	8	1326	0.63	0.0168	10090.ENSMUSP00000002487,10090.ENSMUSP00000004990,10090.ENSMUSP00000020118,10090.ENSMUSP00000022709,10090.ENSMUSP00000025295,10090.ENSMUSP00000033930,10090.ENSMUSP00000036076,10090.ENSMUSP00000046515	Braf,Mapk14,Dusp6,Spry2,Spry4,Dusp4,Il17rd,Elf1
GO Process	GO:0040037	Negative regulation of fibroblast growth factor receptor signaling pathway	2	19	1.87	0.0168	10090.ENSMUSP00000022709,10090.ENSMUSP00000025295	Spry2,Spry4
GO Process	GO:0043085	Positive regulation of catalytic activity	8	1341	0.63	0.018	10090.ENSMUSP00000002487,10090.ENSMUSP00000004990,10090.ENSMUSP00000022709,10090.ENSMUSP00000033665,10090.ENSMUSP00000051619,10090.ENSMUSP00000065983,10090.ENSMUSP00000094326,10090.ENSMUSP00000102711	Braf,Mapk14,Spry2,Map3k15,Mapk3,Mapk1,Map3k2,Jun
GO Process	GO:0080182	Histone h3-k4 trimethylation	2	20	1.85	0.0183	10090.ENSMUSP00000087049,10090.ENSMUSP00000096203	Tet3,Tet2
GO Process	GO:0031058	Positive regulation of histone modification	3	104	1.31	0.019	10090.ENSMUSP00000051619,10090.ENSMUSP00000105396,10090.ENSMUSP00000133279	Mapk3,Dnmt3b,Tet1
GO Process	GO:0031281	Positive regulation of cyclase activity	2	21	1.83	0.0198	10090.ENSMUSP00000004990,10090.ENSMUSP00000051619	Mapk14,Mapk3
GO Process	GO:0045165	Cell fate commitment	4	263	1.03	0.0212	10090.ENSMUSP00000002487,10090.ENSMUSP00000022709,10090.ENSMUSP00000023612,10090.ENSMUSP00000103782	Braf,Spry2,Ets2,Etv2
GO Process	GO:0001502	Cartilage condensation	2	22	1.81	0.0213	10090.ENSMUSP00000004990,10090.ENSMUSP00000056752	Mapk14,Fgf4
GO Process	GO:0001704	Formation of primary germ layer	3	110	1.29	0.0217	10090.ENSMUSP00000023612,10090.ENSMUSP00000033930,10090.ENSMUSP00000103782	Ets2,Dusp4,Etv2
GO Process	GO:0006950	Response to stress	12	3045	0.45	0.0217	10090.ENSMUSP00000002487,10090.ENSMUSP00000004990,10090.ENSMUSP00000008542,10090.ENSMUSP00000020118,10090.ENSMUSP00000020991,10090.ENSMUSP00000021674,10090.ENSMUSP00000034534,10090.ENSMUSP00000051619,10090.ENSMUSP00000065983,10090.ENSMUSP00000094326,10090.ENSMUSP00000102711,10090.ENSMUSP00000110608	Braf,Mapk14,Elk3,Dusp6,Dnmt3a,Fos,Ets1,Mapk3,Mapk1,Map3k2,Jun,Elf4
GO Process	GO:0010759	Positive regulation of macrophage chemotaxis	2	23	1.79	0.0227	10090.ENSMUSP00000004990,10090.ENSMUSP00000051619	Mapk14,Mapk3
GO Process	GO:0090287	Regulation of cellular response to growth factor stimulus	4	277	1.01	0.0245	10090.ENSMUSP00000022709,10090.ENSMUSP00000025295,10090.ENSMUSP00000036076,10090.ENSMUSP00000056752	Spry2,Spry4,Il17rd,Fgf4
GO Process	GO:0002244	Hematopoietic progenitor cell differentiation	3	118	1.26	0.0256	10090.ENSMUSP00000002180,10090.ENSMUSP00000002487,10090.ENSMUSP00000096203	Spi1,Braf,Tet2
GO Process	GO:0060795	Cell fate commitment involved in formation of primary germ layer	2	25	1.76	0.0259	10090.ENSMUSP00000023612,10090.ENSMUSP00000103782	Ets2,Etv2
GO Process	GO:0009991	Response to extracellular stimulus	5	510	0.84	0.0273	10090.ENSMUSP00000020991,10090.ENSMUSP00000021674,10090.ENSMUSP00000051619,10090.ENSMUSP00000065983,10090.ENSMUSP00000102711	Dnmt3a,Fos,Mapk3,Mapk1,Jun
GO Process	GO:0060716	Labyrinthine layer blood vessel development	2	26	1.74	0.0275	10090.ENSMUSP00000064680,10090.ENSMUSP00000065983	Junb,Mapk1
GO Process	GO:0040029	Regulation of gene expression, epigenetic	3	124	1.24	0.0286	10090.ENSMUSP00000002180,10090.ENSMUSP00000020991,10090.ENSMUSP00000105396	Spi1,Dnmt3a,Dnmt3b
GO Process	GO:0060045	Positive regulation of cardiac muscle cell proliferation	2	27	1.72	0.029	10090.ENSMUSP00000004990,10090.ENSMUSP00000065983	Mapk14,Mapk1
GO Process	GO:0022414	Reproductive process	8	1467	0.59	0.0294	10090.ENSMUSP00000004990,10090.ENSMUSP00000020991,10090.ENSMUSP00000021674,10090.ENSMUSP00000034534,10090.ENSMUSP00000051619,10090.ENSMUSP00000064680,10090.ENSMUSP00000065983,10090.ENSMUSP00000103782	Mapk14,Dnmt3a,Fos,Ets1,Mapk3,Junb,Mapk1,Etv2
GO Process	GO:1901216	Positive regulation of neuron death	3	126	1.23	0.0296	10090.ENSMUSP00000009550,10090.ENSMUSP00000021674,10090.ENSMUSP00000102711	Elk1,Fos,Jun
GO Process	GO:1990830	Cellular response to leukemia inhibitory factor	3	127	1.23	0.0301	10090.ENSMUSP00000022709,10090.ENSMUSP00000025295,10090.ENSMUSP00000056752	Spry2,Spry4,Fgf4
GO Process	GO:0045648	Positive regulation of erythrocyte differentiation	2	28	1.71	0.0306	10090.ENSMUSP00000004990,10090.ENSMUSP00000034534	Mapk14,Ets1
GO Process	GO:0051707	Response to other organism	7	1145	0.64	0.0335	10090.ENSMUSP00000004990,10090.ENSMUSP00000021674,10090.ENSMUSP00000051619,10090.ENSMUSP00000064680,10090.ENSMUSP00000065983,10090.ENSMUSP00000102711,10090.ENSMUSP00000110608	Mapk14,Fos,Mapk3,Junb,Mapk1,Jun,Elf4
GO Process	GO:0008283	Cell population proliferation	5	541	0.82	0.0336	10090.ENSMUSP00000031280,10090.ENSMUSP00000056752,10090.ENSMUSP00000064680,10090.ENSMUSP00000065983,10090.ENSMUSP00000110608	Fgf5,Fgf4,Junb,Mapk1,Elf4
GO Process	GO:0018193	Peptidyl-amino acid modification	6	823	0.71	0.0336	10090.ENSMUSP00000002180,10090.ENSMUSP00000004990,10090.ENSMUSP00000051619,10090.ENSMUSP00000065983,10090.ENSMUSP00000087049,10090.ENSMUSP00000096203	Spi1,Mapk14,Mapk3,Mapk1,Tet3,Tet2
GO Process	GO:0042471	Ear morphogenesis	3	134	1.2	0.0339	10090.ENSMUSP00000022709,10090.ENSMUSP00000051619,10090.ENSMUSP00000065983	Spry2,Mapk3,Mapk1
GO Process	GO:0032212	Positive regulation of telomere maintenance via telomerase	2	31	1.66	0.0358	10090.ENSMUSP00000051619,10090.ENSMUSP00000065983	Mapk3,Mapk1
GO Process	GO:0070371	ERK1 and ERK2 cascade	2	31	1.66	0.0358	10090.ENSMUSP00000051619,10090.ENSMUSP00000065983	Mapk3,Mapk1
GO Process	GO:0007165	Signal transduction	13	3779	0.39	0.0378	10090.ENSMUSP00000002180,10090.ENSMUSP00000002487,10090.ENSMUSP00000004990,10090.ENSMUSP00000021674,10090.ENSMUSP00000031280,10090.ENSMUSP00000033665,10090.ENSMUSP00000036076,10090.ENSMUSP00000051619,10090.ENSMUSP00000056752,10090.ENSMUSP00000065983,10090.ENSMUSP00000094326,10090.ENSMUSP00000102711,10090.ENSMUSP00000103782	Spi1,Braf,Mapk14,Fos,Fgf5,Map3k15,Il17rd,Mapk3,Fgf4,Mapk1,Map3k2,Jun,Etv2
GO Process	GO:0009968	Negative regulation of signal transduction	7	1181	0.62	0.0388	10090.ENSMUSP00000004990,10090.ENSMUSP00000020118,10090.ENSMUSP00000022709,10090.ENSMUSP00000025295,10090.ENSMUSP00000033930,10090.ENSMUSP00000036076,10090.ENSMUSP00000046515	Mapk14,Dusp6,Spry2,Spry4,Dusp4,Il17rd,Elf1
GO Process	GO:0001525	Angiogenesis	4	325	0.94	0.0394	10090.ENSMUSP00000004990,10090.ENSMUSP00000008542,10090.ENSMUSP00000034534,10090.ENSMUSP00000102711	Mapk14,Elk3,Ets1,Jun
GO Process	GO:0010719	Negative regulation of epithelial to mesenchymal transition	2	33	1.63	0.0394	10090.ENSMUSP00000022709,10090.ENSMUSP00000036076	Spry2,Il17rd
GO Process	GO:0051973	Positive regulation of telomerase activity	2	34	1.62	0.0411	10090.ENSMUSP00000051619,10090.ENSMUSP00000065983	Mapk3,Mapk1
GO Process	GO:0001824	Blastocyst development	3	147	1.16	0.042	10090.ENSMUSP00000064680,10090.ENSMUSP00000103782,10090.ENSMUSP00000133279	Junb,Etv2,Tet1
GO Process	GO:0048585	Negative regulation of response to stimulus	8	1571	0.56	0.042	10090.ENSMUSP00000004990,10090.ENSMUSP00000020118,10090.ENSMUSP00000022709,10090.ENSMUSP00000025295,10090.ENSMUSP00000033930,10090.ENSMUSP00000034534,10090.ENSMUSP00000036076,10090.ENSMUSP00000046515	Mapk14,Dusp6,Spry2,Spry4,Dusp4,Ets1,Il17rd,Elf1
GO Process	GO:0010212	Response to ionizing radiation	3	151	1.15	0.0446	10090.ENSMUSP00000004990,10090.ENSMUSP00000009550,10090.ENSMUSP00000020991	Mapk14,Elk1,Dnmt3a
GO Process	GO:0090288	Negative regulation of cellular response to growth factor stimulus	3	151	1.15	0.0446	10090.ENSMUSP00000022709,10090.ENSMUSP00000025295,10090.ENSMUSP00000036076	Spry2,Spry4,Il17rd
GO Process	GO:0009267	Cellular response to starvation	3	153	1.14	0.046	10090.ENSMUSP00000051619,10090.ENSMUSP00000065983,10090.ENSMUSP00000102711	Mapk3,Mapk1,Jun
GO Process	GO:0035924	Cellular response to vascular endothelial growth factor stimulus	2	38	1.57	0.049	10090.ENSMUSP00000004990,10090.ENSMUSP00000022709	Mapk14,Spry2
GO Function	GO:0000978	RNA polymerase II cis-regulatory region sequence-specific DNA binding	14	629	1.2	1.49e-10	10090.ENSMUSP00000002180,10090.ENSMUSP00000008542,10090.ENSMUSP00000009550,10090.ENSMUSP00000017868,10090.ENSMUSP00000020991,10090.ENSMUSP00000021674,10090.ENSMUSP00000023612,10090.ENSMUSP00000034534,10090.ENSMUSP00000046515,10090.ENSMUSP00000064680,10090.ENSMUSP00000093442,10090.ENSMUSP00000102711,10090.ENSMUSP00000103782,10090.ENSMUSP00000110608	Spi1,Elk3,Elk1,Etv4,Dnmt3a,Fos,Ets2,Ets1,Elf1,Junb,Etv1,Jun,Etv2,Elf4
GO Function	GO:0003677	DNA binding	19	1928	0.85	4.55e-10	10090.ENSMUSP00000002180,10090.ENSMUSP00000008542,10090.ENSMUSP00000009550,10090.ENSMUSP00000017868,10090.ENSMUSP00000020991,10090.ENSMUSP00000021674,10090.ENSMUSP00000023612,10090.ENSMUSP00000034534,10090.ENSMUSP00000046515,10090.ENSMUSP00000064680,10090.ENSMUSP00000065983,10090.ENSMUSP00000087049,10090.ENSMUSP00000093442,10090.ENSMUSP00000096203,10090.ENSMUSP00000102711,10090.ENSMUSP00000103782…	Spi1,Elk3,Elk1,Etv4,Dnmt3a,Fos,Ets2,Ets1,Elf1,Junb,Mapk1,Tet3,Etv1,Tet2,Jun,Etv2,Dnmt3b,Elf4,Tet1
GO Function	GO:0043565	Sequence-specific dna binding	16	1148	1	4.55e-10	10090.ENSMUSP00000002180,10090.ENSMUSP00000008542,10090.ENSMUSP00000009550,10090.ENSMUSP00000017868,10090.ENSMUSP00000020991,10090.ENSMUSP00000021674,10090.ENSMUSP00000023612,10090.ENSMUSP00000034534,10090.ENSMUSP00000046515,10090.ENSMUSP00000064680,10090.ENSMUSP00000087049,10090.ENSMUSP00000093442,10090.ENSMUSP00000102711,10090.ENSMUSP00000103782,10090.ENSMUSP00000110608,10090.ENSMUSP00000133279	Spi1,Elk3,Elk1,Etv4,Dnmt3a,Fos,Ets2,Ets1,Elf1,Junb,Tet3,Etv1,Jun,Etv2,Elf4,Tet1
GO Function	GO:0001228	DNA-binding transcription activator activity, RNA polymerase II-specific	12	458	1.27	4.76e-10	10090.ENSMUSP00000002180,10090.ENSMUSP00000008542,10090.ENSMUSP00000009550,10090.ENSMUSP00000017868,10090.ENSMUSP00000021674,10090.ENSMUSP00000034534,10090.ENSMUSP00000046515,10090.ENSMUSP00000064680,10090.ENSMUSP00000093442,10090.ENSMUSP00000102711,10090.ENSMUSP00000103782,10090.ENSMUSP00000110608	Spi1,Elk3,Elk1,Etv4,Fos,Ets1,Elf1,Junb,Etv1,Jun,Etv2,Elf4
GO Function	GO:0003690	Double-stranded dna binding	15	1054	1.01	1e-09	10090.ENSMUSP00000002180,10090.ENSMUSP00000008542,10090.ENSMUSP00000009550,10090.ENSMUSP00000017868,10090.ENSMUSP00000020991,10090.ENSMUSP00000021674,10090.ENSMUSP00000023612,10090.ENSMUSP00000034534,10090.ENSMUSP00000046515,10090.ENSMUSP00000064680,10090.ENSMUSP00000065983,10090.ENSMUSP00000093442,10090.ENSMUSP00000102711,10090.ENSMUSP00000103782,10090.ENSMUSP00000110608	Spi1,Elk3,Elk1,Etv4,Dnmt3a,Fos,Ets2,Ets1,Elf1,Junb,Mapk1,Etv1,Jun,Etv2,Elf4
GO Function	GO:0000981	DNA-binding transcription factor activity, RNA polymerase II-specific	13	777	1.08	4.57e-09	10090.ENSMUSP00000002180,10090.ENSMUSP00000008542,10090.ENSMUSP00000009550,10090.ENSMUSP00000017868,10090.ENSMUSP00000021674,10090.ENSMUSP00000023612,10090.ENSMUSP00000034534,10090.ENSMUSP00000046515,10090.ENSMUSP00000064680,10090.ENSMUSP00000093442,10090.ENSMUSP00000102711,10090.ENSMUSP00000103782,10090.ENSMUSP00000110608	Spi1,Elk3,Elk1,Etv4,Fos,Ets2,Ets1,Elf1,Junb,Etv1,Jun,Etv2,Elf4
GO Function	GO:1901363	Heterocyclic compound binding	24	4771	0.55	1.49e-08	10090.ENSMUSP00000002180,10090.ENSMUSP00000002487,10090.ENSMUSP00000004990,10090.ENSMUSP00000008542,10090.ENSMUSP00000009550,10090.ENSMUSP00000017868,10090.ENSMUSP00000020991,10090.ENSMUSP00000021674,10090.ENSMUSP00000023612,10090.ENSMUSP00000033665,10090.ENSMUSP00000034534,10090.ENSMUSP00000046515,10090.ENSMUSP00000051619,10090.ENSMUSP00000064680,10090.ENSMUSP00000065983,10090.ENSMUSP00000087049…	Spi1,Braf,Mapk14,Elk3,Elk1,Etv4,Dnmt3a,Fos,Ets2,Map3k15,Ets1,Elf1,Mapk3,Junb,Mapk1,Tet3,Etv1,Map3k2,Tet2,Jun,Etv2,Dnmt3b,Elf4,Tet1
GO Function	GO:0097159	Organic cyclic compound binding	24	4858	0.55	2.06e-08	10090.ENSMUSP00000002180,10090.ENSMUSP00000002487,10090.ENSMUSP00000004990,10090.ENSMUSP00000008542,10090.ENSMUSP00000009550,10090.ENSMUSP00000017868,10090.ENSMUSP00000020991,10090.ENSMUSP00000021674,10090.ENSMUSP00000023612,10090.ENSMUSP00000033665,10090.ENSMUSP00000034534,10090.ENSMUSP00000046515,10090.ENSMUSP00000051619,10090.ENSMUSP00000064680,10090.ENSMUSP00000065983,10090.ENSMUSP00000087049…	Spi1,Braf,Mapk14,Elk3,Elk1,Etv4,Dnmt3a,Fos,Ets2,Map3k15,Ets1,Elf1,Mapk3,Junb,Mapk1,Tet3,Etv1,Map3k2,Tet2,Jun,Etv2,Dnmt3b,Elf4,Tet1
GO Function	GO:0140110	Transcription regulator activity	14	1296	0.89	1.21e-07	10090.ENSMUSP00000002180,10090.ENSMUSP00000008542,10090.ENSMUSP00000009550,10090.ENSMUSP00000017868,10090.ENSMUSP00000021674,10090.ENSMUSP00000023612,10090.ENSMUSP00000034534,10090.ENSMUSP00000046515,10090.ENSMUSP00000064680,10090.ENSMUSP00000093442,10090.ENSMUSP00000102711,10090.ENSMUSP00000103782,10090.ENSMUSP00000105396,10090.ENSMUSP00000110608	Spi1,Elk3,Elk1,Etv4,Fos,Ets2,Ets1,Elf1,Junb,Etv1,Jun,Etv2,Dnmt3b,Elf4
GO Function	GO:0098772	Molecular function regulator	17	2924	0.62	9.25e-06	10090.ENSMUSP00000002180,10090.ENSMUSP00000008542,10090.ENSMUSP00000009550,10090.ENSMUSP00000017868,10090.ENSMUSP00000021674,10090.ENSMUSP00000022709,10090.ENSMUSP00000023612,10090.ENSMUSP00000031280,10090.ENSMUSP00000034534,10090.ENSMUSP00000046515,10090.ENSMUSP00000056752,10090.ENSMUSP00000064680,10090.ENSMUSP00000093442,10090.ENSMUSP00000102711,10090.ENSMUSP00000103782,10090.ENSMUSP00000105396…	Spi1,Elk3,Elk1,Etv4,Fos,Spry2,Ets2,Fgf5,Ets1,Elf1,Fgf4,Junb,Etv1,Jun,Etv2,Dnmt3b,Elf4
GO Function	GO:0070579	Methylcytosine dioxygenase activity	3	4	2.73	1.49e-05	10090.ENSMUSP00000087049,10090.ENSMUSP00000096203,10090.ENSMUSP00000133279	Tet3,Tet2,Tet1
GO Function	GO:0008134	Transcription factor binding	9	701	0.96	6.03e-05	10090.ENSMUSP00000002180,10090.ENSMUSP00000004990,10090.ENSMUSP00000009550,10090.ENSMUSP00000020991,10090.ENSMUSP00000021674,10090.ENSMUSP00000023612,10090.ENSMUSP00000064680,10090.ENSMUSP00000065983,10090.ENSMUSP00000102711	Spi1,Mapk14,Elk1,Dnmt3a,Fos,Ets2,Junb,Mapk1,Jun
GO Function	GO:0005488	Binding	28	11199	0.25	0.00054	10090.ENSMUSP00000002180,10090.ENSMUSP00000002487,10090.ENSMUSP00000004990,10090.ENSMUSP00000008542,10090.ENSMUSP00000009550,10090.ENSMUSP00000017868,10090.ENSMUSP00000020991,10090.ENSMUSP00000021674,10090.ENSMUSP00000022709,10090.ENSMUSP00000023612,10090.ENSMUSP00000031280,10090.ENSMUSP00000033665,10090.ENSMUSP00000033930,10090.ENSMUSP00000034534,10090.ENSMUSP00000046515,10090.ENSMUSP00000051619…	Spi1,Braf,Mapk14,Elk3,Elk1,Etv4,Dnmt3a,Fos,Spry2,Ets2,Fgf5,Map3k15,Dusp4,Ets1,Elf1,Mapk3,Fgf4,Junb,Mapk1,Tet3,Etv1,Map3k2,Tet2,Jun,Etv2,Dnmt3b,Elf4,Tet1
GO Function	GO:0004707	MAP kinase activity	3	21	2.01	0.00073	10090.ENSMUSP00000004990,10090.ENSMUSP00000051619,10090.ENSMUSP00000065983	Mapk14,Mapk3,Mapk1
GO Function	GO:0004709	MAP kinase kinase kinase activity	3	25	1.93	0.0011	10090.ENSMUSP00000002487,10090.ENSMUSP00000033665,10090.ENSMUSP00000094326	Braf,Map3k15,Map3k2
GO Function	GO:0051719	DNA (cytosine-5-)-methyltransferase activity, acting on CpN substrates	2	2	2.85	0.0015	10090.ENSMUSP00000020991,10090.ENSMUSP00000105396	Dnmt3a,Dnmt3b
GO Function	GO:0004674	Protein serine/threonine kinase activity	6	432	0.99	0.0035	10090.ENSMUSP00000002487,10090.ENSMUSP00000004990,10090.ENSMUSP00000033665,10090.ENSMUSP00000051619,10090.ENSMUSP00000065983,10090.ENSMUSP00000094326	Braf,Mapk14,Map3k15,Mapk3,Mapk1,Map3k2
GO Function	GO:0051525	NFAT protein binding	2	5	2.45	0.0048	10090.ENSMUSP00000002180,10090.ENSMUSP00000004990	Spi1,Mapk14
GO Function	GO:0061629	RNA polymerase II-specific DNA-binding transcription factor binding	5	285	1.1	0.0052	10090.ENSMUSP00000002180,10090.ENSMUSP00000004990,10090.ENSMUSP00000021674,10090.ENSMUSP00000023612,10090.ENSMUSP00000102711	Spi1,Mapk14,Fos,Ets2,Jun
GO Function	GO:0017017	MAP kinase tyrosine/serine/threonine phosphatase activity	2	10	2.15	0.013	10090.ENSMUSP00000020118,10090.ENSMUSP00000033930	Dusp6,Dusp4
GO Function	GO:0004708	MAP kinase kinase activity	2	14	2.01	0.0209	10090.ENSMUSP00000051619,10090.ENSMUSP00000065983	Mapk3,Mapk1
GO Function	GO:0019901	Protein kinase binding	6	707	0.78	0.0349	10090.ENSMUSP00000002487,10090.ENSMUSP00000004990,10090.ENSMUSP00000022709,10090.ENSMUSP00000033930,10090.ENSMUSP00000065983,10090.ENSMUSP00000094326	Braf,Mapk14,Spry2,Dusp4,Mapk1,Map3k2
GO Function	GO:0008327	methyl-CpG binding	2	23	1.79	0.0453	10090.ENSMUSP00000087049,10090.ENSMUSP00000133279	Tet3,Tet1
GO Component	GO:0005634	Nucleus	27	6330	0.48	3.53e-08	10090.ENSMUSP00000002180,10090.ENSMUSP00000002487,10090.ENSMUSP00000004990,10090.ENSMUSP00000008542,10090.ENSMUSP00000009550,10090.ENSMUSP00000017868,10090.ENSMUSP00000020118,10090.ENSMUSP00000020991,10090.ENSMUSP00000021674,10090.ENSMUSP00000022709,10090.ENSMUSP00000023612,10090.ENSMUSP00000033930,10090.ENSMUSP00000034534,10090.ENSMUSP00000036076,10090.ENSMUSP00000046515,10090.ENSMUSP00000051619…	Spi1,Braf,Mapk14,Elk3,Elk1,Etv4,Dusp6,Dnmt3a,Fos,Spry2,Ets2,Dusp4,Ets1,Il17rd,Elf1,Mapk3,Junb,Mapk1,Tet3,Etv1,Map3k2,Tet2,Jun,Etv2,Dnmt3b,Elf4,Tet1
GO Component	GO:0005654	Nucleoplasm	21	3261	0.66	3.53e-08	10090.ENSMUSP00000002180,10090.ENSMUSP00000004990,10090.ENSMUSP00000008542,10090.ENSMUSP00000009550,10090.ENSMUSP00000020118,10090.ENSMUSP00000020991,10090.ENSMUSP00000021674,10090.ENSMUSP00000023612,10090.ENSMUSP00000033930,10090.ENSMUSP00000034534,10090.ENSMUSP00000036076,10090.ENSMUSP00000051619,10090.ENSMUSP00000064680,10090.ENSMUSP00000065983,10090.ENSMUSP00000087049,10090.ENSMUSP00000094326…	Spi1,Mapk14,Elk3,Elk1,Dusp6,Dnmt3a,Fos,Ets2,Dusp4,Ets1,Il17rd,Mapk3,Junb,Mapk1,Tet3,Map3k2,Tet2,Jun,Dnmt3b,Elf4,Tet1
GO Component	GO:0031981	Nuclear lumen	22	3771	0.62	3.53e-08	10090.ENSMUSP00000002180,10090.ENSMUSP00000004990,10090.ENSMUSP00000008542,10090.ENSMUSP00000009550,10090.ENSMUSP00000017868,10090.ENSMUSP00000020118,10090.ENSMUSP00000020991,10090.ENSMUSP00000021674,10090.ENSMUSP00000023612,10090.ENSMUSP00000033930,10090.ENSMUSP00000034534,10090.ENSMUSP00000036076,10090.ENSMUSP00000051619,10090.ENSMUSP00000064680,10090.ENSMUSP00000065983,10090.ENSMUSP00000087049…	Spi1,Mapk14,Elk3,Elk1,Etv4,Dusp6,Dnmt3a,Fos,Ets2,Dusp4,Ets1,Il17rd,Mapk3,Junb,Mapk1,Tet3,Map3k2,Tet2,Jun,Dnmt3b,Elf4,Tet1
GO Component	GO:0035976	Transcription factor ap-1 complex	3	4	2.73	2.12e-05	10090.ENSMUSP00000021674,10090.ENSMUSP00000064680,10090.ENSMUSP00000102711	Fos,Junb,Jun
GO Component	GO:0005622	Intracellular	28	12596	0.2	0.0091	10090.ENSMUSP00000002180,10090.ENSMUSP00000002487,10090.ENSMUSP00000004990,10090.ENSMUSP00000008542,10090.ENSMUSP00000009550,10090.ENSMUSP00000017868,10090.ENSMUSP00000020118,10090.ENSMUSP00000020991,10090.ENSMUSP00000021674,10090.ENSMUSP00000022709,10090.ENSMUSP00000023612,10090.ENSMUSP00000025295,10090.ENSMUSP00000033930,10090.ENSMUSP00000034534,10090.ENSMUSP00000036076,10090.ENSMUSP00000046515…	Spi1,Braf,Mapk14,Elk3,Elk1,Etv4,Dusp6,Dnmt3a,Fos,Spry2,Ets2,Spry4,Dusp4,Ets1,Il17rd,Elf1,Mapk3,Junb,Mapk1,Tet3,Etv1,Map3k2,Tet2,Jun,Etv2,Dnmt3b,Elf4,Tet1
GO Component	GO:0000790	Nuclear chromatin	5	370	0.98	0.0212	10090.ENSMUSP00000002180,10090.ENSMUSP00000020991,10090.ENSMUSP00000064680,10090.ENSMUSP00000102711,10090.ENSMUSP00000105396	Spi1,Dnmt3a,Junb,Jun,Dnmt3b
GO Component	GO:0031143	Pseudopodium	2	15	1.98	0.031	10090.ENSMUSP00000051619,10090.ENSMUSP00000065983	Mapk3,Mapk1
GO Component	GO:0110165	Cellular anatomical entity	30	15632	0.14	0.0366	10090.ENSMUSP00000002180,10090.ENSMUSP00000002487,10090.ENSMUSP00000004990,10090.ENSMUSP00000008542,10090.ENSMUSP00000009550,10090.ENSMUSP00000017868,10090.ENSMUSP00000020118,10090.ENSMUSP00000020991,10090.ENSMUSP00000021674,10090.ENSMUSP00000022709,10090.ENSMUSP00000023612,10090.ENSMUSP00000025295,10090.ENSMUSP00000031280,10090.ENSMUSP00000033930,10090.ENSMUSP00000034534,10090.ENSMUSP00000036076…	Spi1,Braf,Mapk14,Elk3,Elk1,Etv4,Dusp6,Dnmt3a,Fos,Spry2,Ets2,Spry4,Fgf5,Dusp4,Ets1,Il17rd,Elf1,Mapk3,Fgf4,Junb,Mapk1,Tet3,Etv1,Map3k2,Tet2,Jun,Etv2,Dnmt3b,Elf4,Tet1
GO Component	GO:0005667	Transcription regulator complex	5	466	0.88	0.0492	10090.ENSMUSP00000002180,10090.ENSMUSP00000021674,10090.ENSMUSP00000034534,10090.ENSMUSP00000064680,10090.ENSMUSP00000102711	Spi1,Fos,Ets1,Junb,Jun
STRING clusters	CL:12196	Mixed, incl. mapk signaling pathway, and ras gtpase-activating protein	7	86	1.76	2.2e-07	10090.ENSMUSP00000002487,10090.ENSMUSP00000020118,10090.ENSMUSP00000033665,10090.ENSMUSP00000033930,10090.ENSMUSP00000051619,10090.ENSMUSP00000065983,10090.ENSMUSP00000094326	Braf,Dusp6,Map3k15,Dusp4,Mapk3,Mapk1,Map3k2
STRING clusters	CL:12197	Mixed, incl. map kinase activation, and map kinase kinase kinase activity	6	48	1.95	2.75e-07	10090.ENSMUSP00000020118,10090.ENSMUSP00000033665,10090.ENSMUSP00000033930,10090.ENSMUSP00000051619,10090.ENSMUSP00000065983,10090.ENSMUSP00000094326	Dusp6,Map3k15,Dusp4,Mapk3,Mapk1,Map3k2
STRING clusters	CL:12198	Mixed, incl. map kinase activation, and dscam interactions	5	41	1.94	8.3e-06	10090.ENSMUSP00000020118,10090.ENSMUSP00000033930,10090.ENSMUSP00000051619,10090.ENSMUSP00000065983,10090.ENSMUSP00000094326	Dusp6,Dusp4,Mapk3,Mapk1,Map3k2
STRING clusters	CL:12254	ERKs are inactivated, and Protein-tyrosine phosphatase, KIM-containing	4	13	2.34	9.08e-06	10090.ENSMUSP00000020118,10090.ENSMUSP00000033930,10090.ENSMUSP00000051619,10090.ENSMUSP00000065983	Dusp6,Dusp4,Mapk3,Mapk1
STRING clusters	CL:1393	Mixed, incl. zinc finger, nhr/gata-type, and estrogen-dependent gene expression	6	101	1.63	9.08e-06	10090.ENSMUSP00000002180,10090.ENSMUSP00000021674,10090.ENSMUSP00000023612,10090.ENSMUSP00000034534,10090.ENSMUSP00000064680,10090.ENSMUSP00000102711	Spi1,Fos,Ets2,Ets1,Junb,Jun
STRING clusters	CL:12258	Mitogen-activated protein (MAP) kinase, ERK1/2, and MAP kinase tyrosine phosphatase activity	3	5	2.63	8.49e-05	10090.ENSMUSP00000020118,10090.ENSMUSP00000051619,10090.ENSMUSP00000065983	Dusp6,Mapk3,Mapk1
STRING clusters	CL:502	Mixed, incl. dna methylation on cytosine, and chromo shadow domain	3	12	2.25	0.00061	10090.ENSMUSP00000020991,10090.ENSMUSP00000105396,10090.ENSMUSP00000133279	Dnmt3a,Dnmt3b,Tet1
STRING clusters	CL:1507	Mixed, incl. myeloid dendritic cell differentiation, and transforming protein c-ets	3	21	2.01	0.0022	10090.ENSMUSP00000002180,10090.ENSMUSP00000023612,10090.ENSMUSP00000034534	Spi1,Ets2,Ets1
STRING clusters	CL:12187	Sprouty protein (Spry)	2	5	2.45	0.0149	10090.ENSMUSP00000022709,10090.ENSMUSP00000025295	Spry2,Spry4
STRING clusters	CL:1474	Transcription factor ap-1 complex, and protein fosb	2	5	2.45	0.0149	10090.ENSMUSP00000021674,10090.ENSMUSP00000064680	Fos,Junb
STRING clusters	CL:505	DNMT3, cysteine rich ADD domain, and DNA (cytosine-5)-methyltransferase 1-like	2	5	2.45	0.0149	10090.ENSMUSP00000020991,10090.ENSMUSP00000105396	Dnmt3a,Dnmt3b
STRING clusters	CL:1394	Mixed, incl. nuclear receptor activity, and pas domain	3	56	1.58	0.0221	10090.ENSMUSP00000021674,10090.ENSMUSP00000064680,10090.ENSMUSP00000102711	Fos,Junb,Jun
KEGG	mmu04010	MAPK signaling pathway	12	289	1.47	1.23e-12	10090.ENSMUSP00000002487,10090.ENSMUSP00000004990,10090.ENSMUSP00000009550,10090.ENSMUSP00000020118,10090.ENSMUSP00000021674,10090.ENSMUSP00000031280,10090.ENSMUSP00000033930,10090.ENSMUSP00000051619,10090.ENSMUSP00000056752,10090.ENSMUSP00000065983,10090.ENSMUSP00000094326,10090.ENSMUSP00000102711	Braf,Mapk14,Elk1,Dusp6,Fos,Fgf5,Dusp4,Mapk3,Fgf4,Mapk1,Map3k2,Jun
KEGG	mmu04380	Osteoclast differentiation	7	121	1.61	7.25e-08	10090.ENSMUSP00000002180,10090.ENSMUSP00000004990,10090.ENSMUSP00000021674,10090.ENSMUSP00000051619,10090.ENSMUSP00000064680,10090.ENSMUSP00000065983,10090.ENSMUSP00000102711	Spi1,Mapk14,Fos,Mapk3,Junb,Mapk1,Jun
KEGG	mmu05140	Leishmaniasis	6	67	1.8	8.08e-08	10090.ENSMUSP00000004990,10090.ENSMUSP00000009550,10090.ENSMUSP00000021674,10090.ENSMUSP00000051619,10090.ENSMUSP00000065983,10090.ENSMUSP00000102711	Mapk14,Elk1,Fos,Mapk3,Mapk1,Jun
KEGG	mmu05166	Human T-cell leukemia virus 1 infection	8	231	1.39	8.86e-08	10090.ENSMUSP00000002180,10090.ENSMUSP00000009550,10090.ENSMUSP00000021674,10090.ENSMUSP00000023612,10090.ENSMUSP00000034534,10090.ENSMUSP00000051619,10090.ENSMUSP00000065983,10090.ENSMUSP00000102711	Spi1,Elk1,Fos,Ets2,Ets1,Mapk3,Mapk1,Jun
KEGG	mmu05224	Breast cancer	7	145	1.54	9.7e-08	10090.ENSMUSP00000002487,10090.ENSMUSP00000021674,10090.ENSMUSP00000031280,10090.ENSMUSP00000051619,10090.ENSMUSP00000056752,10090.ENSMUSP00000065983,10090.ENSMUSP00000102711	Braf,Fos,Fgf5,Mapk3,Fgf4,Mapk1,Jun
KEGG	mmu05200	Pathways in cancer	10	528	1.13	1.05e-07	10090.ENSMUSP00000002180,10090.ENSMUSP00000002487,10090.ENSMUSP00000009550,10090.ENSMUSP00000021674,10090.ENSMUSP00000031280,10090.ENSMUSP00000034534,10090.ENSMUSP00000051619,10090.ENSMUSP00000056752,10090.ENSMUSP00000065983,10090.ENSMUSP00000102711	Spi1,Braf,Elk1,Fos,Fgf5,Ets1,Mapk3,Fgf4,Mapk1,Jun
KEGG	mmu04912	GnRH signaling pathway	6	86	1.7	1.39e-07	10090.ENSMUSP00000004990,10090.ENSMUSP00000009550,10090.ENSMUSP00000051619,10090.ENSMUSP00000065983,10090.ENSMUSP00000094326,10090.ENSMUSP00000102711	Mapk14,Elk1,Mapk3,Mapk1,Map3k2,Jun
KEGG	mmu05161	Hepatitis B	7	161	1.49	1.39e-07	10090.ENSMUSP00000002487,10090.ENSMUSP00000004990,10090.ENSMUSP00000009550,10090.ENSMUSP00000021674,10090.ENSMUSP00000051619,10090.ENSMUSP00000065983,10090.ENSMUSP00000102711	Braf,Mapk14,Elk1,Fos,Mapk3,Mapk1,Jun
KEGG	mmu01522	Endocrine resistance	6	91	1.67	1.53e-07	10090.ENSMUSP00000002487,10090.ENSMUSP00000004990,10090.ENSMUSP00000021674,10090.ENSMUSP00000051619,10090.ENSMUSP00000065983,10090.ENSMUSP00000102711	Braf,Mapk14,Fos,Mapk3,Mapk1,Jun
KEGG	mmu04668	TNF signaling pathway	6	112	1.58	4.49e-07	10090.ENSMUSP00000004990,10090.ENSMUSP00000021674,10090.ENSMUSP00000051619,10090.ENSMUSP00000064680,10090.ENSMUSP00000065983,10090.ENSMUSP00000102711	Mapk14,Fos,Mapk3,Junb,Mapk1,Jun
KEGG	mmu04014	Ras signaling pathway	7	224	1.35	8.03e-07	10090.ENSMUSP00000009550,10090.ENSMUSP00000023612,10090.ENSMUSP00000031280,10090.ENSMUSP00000034534,10090.ENSMUSP00000051619,10090.ENSMUSP00000056752,10090.ENSMUSP00000065983	Elk1,Ets2,Fgf5,Ets1,Mapk3,Fgf4,Mapk1
KEGG	mmu05211	Renal cell carcinoma	5	66	1.73	1.31e-06	10090.ENSMUSP00000002487,10090.ENSMUSP00000034534,10090.ENSMUSP00000051619,10090.ENSMUSP00000065983,10090.ENSMUSP00000102711	Braf,Ets1,Mapk3,Mapk1,Jun
KEGG	mmu05218	Melanoma	5	71	1.7	1.6e-06	10090.ENSMUSP00000002487,10090.ENSMUSP00000031280,10090.ENSMUSP00000051619,10090.ENSMUSP00000056752,10090.ENSMUSP00000065983	Braf,Fgf5,Mapk3,Fgf4,Mapk1
KEGG	mmu05221	Acute myeloid leukemia	5	70	1.71	1.6e-06	10090.ENSMUSP00000002180,10090.ENSMUSP00000002487,10090.ENSMUSP00000020118,10090.ENSMUSP00000051619,10090.ENSMUSP00000065983	Spi1,Braf,Dusp6,Mapk3,Mapk1
KEGG	mmu05133	Pertussis	5	73	1.69	1.69e-06	10090.ENSMUSP00000004990,10090.ENSMUSP00000021674,10090.ENSMUSP00000051619,10090.ENSMUSP00000065983,10090.ENSMUSP00000102711	Mapk14,Fos,Mapk3,Mapk1,Jun
KEGG	mmu04012	ErbB signaling pathway	5	81	1.64	2.59e-06	10090.ENSMUSP00000002487,10090.ENSMUSP00000009550,10090.ENSMUSP00000051619,10090.ENSMUSP00000065983,10090.ENSMUSP00000102711	Braf,Elk1,Mapk3,Mapk1,Jun
KEGG	mmu04658	Th1 and Th2 cell differentiation	5	86	1.62	3.24e-06	10090.ENSMUSP00000004990,10090.ENSMUSP00000021674,10090.ENSMUSP00000051619,10090.ENSMUSP00000065983,10090.ENSMUSP00000102711	Mapk14,Fos,Mapk3,Mapk1,Jun
KEGG	mmu05210	Colorectal cancer	5	88	1.61	3.24e-06	10090.ENSMUSP00000002487,10090.ENSMUSP00000021674,10090.ENSMUSP00000051619,10090.ENSMUSP00000065983,10090.ENSMUSP00000102711	Braf,Fos,Mapk3,Mapk1,Jun
KEGG	mmu05235	PD-L1 expression and PD-1 checkpoint pathway in cancer	5	86	1.62	3.24e-06	10090.ENSMUSP00000004990,10090.ENSMUSP00000021674,10090.ENSMUSP00000051619,10090.ENSMUSP00000065983,10090.ENSMUSP00000102711	Mapk14,Fos,Mapk3,Mapk1,Jun
KEGG	mmu04657	IL-17 signaling pathway	5	90	1.6	3.42e-06	10090.ENSMUSP00000004990,10090.ENSMUSP00000021674,10090.ENSMUSP00000051619,10090.ENSMUSP00000065983,10090.ENSMUSP00000102711	Mapk14,Fos,Mapk3,Mapk1,Jun
KEGG	mmu04620	Toll-like receptor signaling pathway	5	98	1.56	4.89e-06	10090.ENSMUSP00000004990,10090.ENSMUSP00000021674,10090.ENSMUSP00000051619,10090.ENSMUSP00000065983,10090.ENSMUSP00000102711	Mapk14,Fos,Mapk3,Mapk1,Jun
KEGG	mmu05142	Chagas disease	5	100	1.55	5.14e-06	10090.ENSMUSP00000004990,10090.ENSMUSP00000021674,10090.ENSMUSP00000051619,10090.ENSMUSP00000065983,10090.ENSMUSP00000102711	Mapk14,Fos,Mapk3,Mapk1,Jun
KEGG	mmu04659	Th17 cell differentiation	5	101	1.55	5.15e-06	10090.ENSMUSP00000004990,10090.ENSMUSP00000021674,10090.ENSMUSP00000051619,10090.ENSMUSP00000065983,10090.ENSMUSP00000102711	Mapk14,Fos,Mapk3,Mapk1,Jun
KEGG	mmu04660	T cell receptor signaling pathway	5	102	1.54	5.17e-06	10090.ENSMUSP00000004990,10090.ENSMUSP00000021674,10090.ENSMUSP00000051619,10090.ENSMUSP00000065983,10090.ENSMUSP00000102711	Mapk14,Fos,Mapk3,Mapk1,Jun
KEGG	mmu04015	Rap1 signaling pathway	6	208	1.31	6.17e-06	10090.ENSMUSP00000002487,10090.ENSMUSP00000004990,10090.ENSMUSP00000031280,10090.ENSMUSP00000051619,10090.ENSMUSP00000056752,10090.ENSMUSP00000065983	Braf,Mapk14,Fgf5,Mapk3,Fgf4,Mapk1
KEGG	mmu04935	Growth hormone synthesis, secretion and action	5	114	1.49	8.11e-06	10090.ENSMUSP00000004990,10090.ENSMUSP00000021674,10090.ENSMUSP00000051619,10090.ENSMUSP00000064680,10090.ENSMUSP00000065983	Mapk14,Fos,Mapk3,Junb,Mapk1
KEGG	mmu04722	Neurotrophin signaling pathway	5	116	1.49	8.48e-06	10090.ENSMUSP00000002487,10090.ENSMUSP00000004990,10090.ENSMUSP00000051619,10090.ENSMUSP00000065983,10090.ENSMUSP00000102711	Braf,Mapk14,Mapk3,Mapk1,Jun
KEGG	mmu05135	Yersinia infection	5	124	1.46	1.12e-05	10090.ENSMUSP00000004990,10090.ENSMUSP00000021674,10090.ENSMUSP00000051619,10090.ENSMUSP00000065983,10090.ENSMUSP00000102711	Mapk14,Fos,Mapk3,Mapk1,Jun
KEGG	mmu04926	Relaxin signaling pathway	5	127	1.45	1.22e-05	10090.ENSMUSP00000004990,10090.ENSMUSP00000021674,10090.ENSMUSP00000051619,10090.ENSMUSP00000065983,10090.ENSMUSP00000102711	Mapk14,Fos,Mapk3,Mapk1,Jun
KEGG	mmu05213	Endometrial cancer	4	58	1.69	1.85e-05	10090.ENSMUSP00000002487,10090.ENSMUSP00000009550,10090.ENSMUSP00000051619,10090.ENSMUSP00000065983	Braf,Elk1,Mapk3,Mapk1
KEGG	mmu04921	Oxytocin signaling pathway	5	145	1.39	2.14e-05	10090.ENSMUSP00000009550,10090.ENSMUSP00000021674,10090.ENSMUSP00000051619,10090.ENSMUSP00000065983,10090.ENSMUSP00000102711	Elk1,Fos,Mapk3,Mapk1,Jun
KEGG	mmu05226	Gastric cancer	5	147	1.38	2.21e-05	10090.ENSMUSP00000002487,10090.ENSMUSP00000031280,10090.ENSMUSP00000051619,10090.ENSMUSP00000056752,10090.ENSMUSP00000065983	Braf,Fgf5,Mapk3,Fgf4,Mapk1
KEGG	mmu05206	MicroRNAs in cancer	5	158	1.35	3.02e-05	10090.ENSMUSP00000020991,10090.ENSMUSP00000022709,10090.ENSMUSP00000051619,10090.ENSMUSP00000065983,10090.ENSMUSP00000105396	Dnmt3a,Spry2,Mapk3,Mapk1,Dnmt3b
KEGG	mmu04917	Prolactin signaling pathway	4	74	1.58	4.12e-05	10090.ENSMUSP00000004990,10090.ENSMUSP00000021674,10090.ENSMUSP00000051619,10090.ENSMUSP00000065983	Mapk14,Fos,Mapk3,Mapk1
KEGG	mmu04662	B cell receptor signaling pathway	4	75	1.58	4.21e-05	10090.ENSMUSP00000021674,10090.ENSMUSP00000051619,10090.ENSMUSP00000065983,10090.ENSMUSP00000102711	Fos,Mapk3,Mapk1,Jun
KEGG	mmu04510	Focal adhesion	5	196	1.26	7.69e-05	10090.ENSMUSP00000002487,10090.ENSMUSP00000009550,10090.ENSMUSP00000051619,10090.ENSMUSP00000065983,10090.ENSMUSP00000102711	Braf,Elk1,Mapk3,Mapk1,Jun
KEGG	mmu04914	Progesterone-mediated oocyte maturation	4	90	1.5	7.96e-05	10090.ENSMUSP00000002487,10090.ENSMUSP00000004990,10090.ENSMUSP00000051619,10090.ENSMUSP00000065983	Braf,Mapk14,Mapk3,Mapk1
KEGG	mmu05205	Proteoglycans in cancer	5	199	1.25	7.96e-05	10090.ENSMUSP00000002487,10090.ENSMUSP00000004990,10090.ENSMUSP00000009550,10090.ENSMUSP00000051619,10090.ENSMUSP00000065983	Braf,Mapk14,Elk1,Mapk3,Mapk1
KEGG	mmu04024	cAMP signaling pathway	5	210	1.23	9.84e-05	10090.ENSMUSP00000002487,10090.ENSMUSP00000021674,10090.ENSMUSP00000051619,10090.ENSMUSP00000065983,10090.ENSMUSP00000102711	Braf,Fos,Mapk3,Mapk1,Jun
KEGG	mmu04810	Regulation of actin cytoskeleton	5	212	1.22	9.84e-05	10090.ENSMUSP00000002487,10090.ENSMUSP00000031280,10090.ENSMUSP00000051619,10090.ENSMUSP00000056752,10090.ENSMUSP00000065983	Braf,Fgf5,Mapk3,Fgf4,Mapk1
KEGG	mmu05132	Salmonella infection	5	213	1.22	9.84e-05	10090.ENSMUSP00000004990,10090.ENSMUSP00000021674,10090.ENSMUSP00000051619,10090.ENSMUSP00000065983,10090.ENSMUSP00000102711	Mapk14,Fos,Mapk3,Mapk1,Jun
KEGG	mmu05167	Kaposi sarcoma-associated herpesvirus infection	5	210	1.23	9.84e-05	10090.ENSMUSP00000004990,10090.ENSMUSP00000021674,10090.ENSMUSP00000051619,10090.ENSMUSP00000065983,10090.ENSMUSP00000102711	Mapk14,Fos,Mapk3,Mapk1,Jun
KEGG	mmu05231	Choline metabolism in cancer	4	97	1.47	9.84e-05	10090.ENSMUSP00000021674,10090.ENSMUSP00000051619,10090.ENSMUSP00000065983,10090.ENSMUSP00000102711	Fos,Mapk3,Mapk1,Jun
KEGG	mmu04933	AGE-RAGE signaling pathway in diabetic complications	4	101	1.45	0.0001	10090.ENSMUSP00000004990,10090.ENSMUSP00000051619,10090.ENSMUSP00000065983,10090.ENSMUSP00000102711	Mapk14,Mapk3,Mapk1,Jun
KEGG	mmu05170	Human immunodeficiency virus 1 infection	5	222	1.2	0.00011	10090.ENSMUSP00000004990,10090.ENSMUSP00000021674,10090.ENSMUSP00000051619,10090.ENSMUSP00000065983,10090.ENSMUSP00000102711	Mapk14,Fos,Mapk3,Mapk1,Jun
KEGG	mmu04928	Parathyroid hormone synthesis, secretion and action	4	106	1.43	0.00012	10090.ENSMUSP00000002487,10090.ENSMUSP00000021674,10090.ENSMUSP00000051619,10090.ENSMUSP00000065983	Braf,Fos,Mapk3,Mapk1
KEGG	mmu04625	C-type lectin receptor signaling pathway	4	109	1.42	0.00013	10090.ENSMUSP00000004990,10090.ENSMUSP00000051619,10090.ENSMUSP00000065983,10090.ENSMUSP00000102711	Mapk14,Mapk3,Mapk1,Jun
KEGG	mmu05216	Thyroid cancer	3	36	1.77	0.00015	10090.ENSMUSP00000002487,10090.ENSMUSP00000051619,10090.ENSMUSP00000065983	Braf,Mapk3,Mapk1
KEGG	mmu05219	Bladder cancer	3	40	1.73	0.0002	10090.ENSMUSP00000002487,10090.ENSMUSP00000051619,10090.ENSMUSP00000065983	Braf,Mapk3,Mapk1
KEGG	mmu04068	FoxO signaling pathway	4	130	1.34	0.00024	10090.ENSMUSP00000002487,10090.ENSMUSP00000004990,10090.ENSMUSP00000051619,10090.ENSMUSP00000065983	Braf,Mapk14,Mapk3,Mapk1
KEGG	mmu04915	Estrogen signaling pathway	4	130	1.34	0.00024	10090.ENSMUSP00000021674,10090.ENSMUSP00000051619,10090.ENSMUSP00000065983,10090.ENSMUSP00000102711	Fos,Mapk3,Mapk1,Jun
KEGG	mmu04910	Insulin signaling pathway	4	133	1.33	0.00025	10090.ENSMUSP00000002487,10090.ENSMUSP00000009550,10090.ENSMUSP00000051619,10090.ENSMUSP00000065983	Braf,Elk1,Mapk3,Mapk1
KEGG	mmu04210	Apoptosis	4	135	1.32	0.00026	10090.ENSMUSP00000021674,10090.ENSMUSP00000051619,10090.ENSMUSP00000065983,10090.ENSMUSP00000102711	Fos,Mapk3,Mapk1,Jun
KEGG	mmu04370	VEGF signaling pathway	3	58	1.57	0.00052	10090.ENSMUSP00000004990,10090.ENSMUSP00000051619,10090.ENSMUSP00000065983	Mapk14,Mapk3,Mapk1
KEGG	mmu04730	Long-term depression	3	58	1.57	0.00052	10090.ENSMUSP00000002487,10090.ENSMUSP00000051619,10090.ENSMUSP00000065983	Braf,Mapk3,Mapk1
KEGG	mmu04218	Cellular senescence	4	167	1.23	0.00055	10090.ENSMUSP00000004990,10090.ENSMUSP00000034534,10090.ENSMUSP00000051619,10090.ENSMUSP00000065983	Mapk14,Ets1,Mapk3,Mapk1
KEGG	mmu05225	Hepatocellular carcinoma	4	168	1.23	0.00055	10090.ENSMUSP00000002487,10090.ENSMUSP00000009550,10090.ENSMUSP00000051619,10090.ENSMUSP00000065983	Braf,Elk1,Mapk3,Mapk1
KEGG	mmu04720	Long-term potentiation	3	63	1.53	0.00062	10090.ENSMUSP00000002487,10090.ENSMUSP00000051619,10090.ENSMUSP00000065983	Braf,Mapk3,Mapk1
KEGG	mmu04664	Fc epsilon RI signaling pathway	3	66	1.51	0.00069	10090.ENSMUSP00000004990,10090.ENSMUSP00000051619,10090.ENSMUSP00000065983	Mapk14,Mapk3,Mapk1
KEGG	mmu05223	Non-small cell lung cancer	3	66	1.51	0.00069	10090.ENSMUSP00000002487,10090.ENSMUSP00000051619,10090.ENSMUSP00000065983	Braf,Mapk3,Mapk1
KEGG	mmu05214	Glioma	3	70	1.48	0.00079	10090.ENSMUSP00000002487,10090.ENSMUSP00000051619,10090.ENSMUSP00000065983	Braf,Mapk3,Mapk1
KEGG	mmu04621	NOD-like receptor signaling pathway	4	191	1.17	0.00082	10090.ENSMUSP00000004990,10090.ENSMUSP00000051619,10090.ENSMUSP00000065983,10090.ENSMUSP00000102711	Mapk14,Mapk3,Mapk1,Jun
KEGG	mmu05202	Transcriptional misregulation in cancer	4	192	1.17	0.00083	10090.ENSMUSP00000002180,10090.ENSMUSP00000017868,10090.ENSMUSP00000020118,10090.ENSMUSP00000093442	Spi1,Etv4,Dusp6,Etv1
KEGG	mmu05212	Pancreatic cancer	3	74	1.46	0.00089	10090.ENSMUSP00000002487,10090.ENSMUSP00000051619,10090.ENSMUSP00000065983	Braf,Mapk3,Mapk1
KEGG	mmu05220	Chronic myeloid leukemia	3	74	1.46	0.00089	10090.ENSMUSP00000002487,10090.ENSMUSP00000051619,10090.ENSMUSP00000065983	Braf,Mapk3,Mapk1
KEGG	mmu01521	EGFR tyrosine kinase inhibitor resistance	3	78	1.44	0.001	10090.ENSMUSP00000002487,10090.ENSMUSP00000051619,10090.ENSMUSP00000065983	Braf,Mapk3,Mapk1
KEGG	mmu04540	Gap junction	3	84	1.4	0.0012	10090.ENSMUSP00000051619,10090.ENSMUSP00000065983,10090.ENSMUSP00000094326	Mapk3,Mapk1,Map3k2
KEGG	mmu04713	Circadian entrainment	3	93	1.36	0.0016	10090.ENSMUSP00000021674,10090.ENSMUSP00000051619,10090.ENSMUSP00000065983	Fos,Mapk3,Mapk1
KEGG	mmu05163	Human cytomegalovirus infection	4	236	1.08	0.0016	10090.ENSMUSP00000004990,10090.ENSMUSP00000009550,10090.ENSMUSP00000051619,10090.ENSMUSP00000065983	Mapk14,Elk1,Mapk3,Mapk1
KEGG	mmu05215	Prostate cancer	3	99	1.33	0.0019	10090.ENSMUSP00000002487,10090.ENSMUSP00000051619,10090.ENSMUSP00000065983	Braf,Mapk3,Mapk1
KEGG	mmu05145	Toxoplasmosis	3	106	1.3	0.0022	10090.ENSMUSP00000004990,10090.ENSMUSP00000051619,10090.ENSMUSP00000065983	Mapk14,Mapk3,Mapk1
KEGG	mmu04725	Cholinergic synapse	3	110	1.29	0.0024	10090.ENSMUSP00000021674,10090.ENSMUSP00000051619,10090.ENSMUSP00000065983	Fos,Mapk3,Mapk1
KEGG	mmu04650	Natural killer cell mediated cytotoxicity	3	113	1.28	0.0026	10090.ENSMUSP00000002487,10090.ENSMUSP00000051619,10090.ENSMUSP00000065983	Braf,Mapk3,Mapk1
KEGG	mmu04114	Oocyte meiosis	3	115	1.27	0.0027	10090.ENSMUSP00000004990,10090.ENSMUSP00000051619,10090.ENSMUSP00000065983	Mapk14,Mapk3,Mapk1
KEGG	mmu04611	Platelet activation	3	120	1.25	0.003	10090.ENSMUSP00000004990,10090.ENSMUSP00000051619,10090.ENSMUSP00000065983	Mapk14,Mapk3,Mapk1
KEGG	mmu04071	Sphingolipid signaling pathway	3	122	1.24	0.0031	10090.ENSMUSP00000004990,10090.ENSMUSP00000051619,10090.ENSMUSP00000065983	Mapk14,Mapk3,Mapk1
KEGG	mmu04726	Serotonergic synapse	3	126	1.23	0.0034	10090.ENSMUSP00000002487,10090.ENSMUSP00000051619,10090.ENSMUSP00000065983	Braf,Mapk3,Mapk1
KEGG	mmu04270	Vascular smooth muscle contraction	3	132	1.21	0.0038	10090.ENSMUSP00000002487,10090.ENSMUSP00000051619,10090.ENSMUSP00000065983	Braf,Mapk3,Mapk1
KEGG	mmu04550	Signaling pathways regulating pluripotency of stem cells	3	137	1.19	0.0041	10090.ENSMUSP00000004990,10090.ENSMUSP00000051619,10090.ENSMUSP00000065983	Mapk14,Mapk3,Mapk1
KEGG	mmu05418	Fluid shear stress and atherosclerosis	3	141	1.18	0.0044	10090.ENSMUSP00000004990,10090.ENSMUSP00000021674,10090.ENSMUSP00000102711	Mapk14,Fos,Jun
KEGG	mmu04261	Adrenergic signaling in cardiomyocytes	3	143	1.17	0.0046	10090.ENSMUSP00000004990,10090.ENSMUSP00000051619,10090.ENSMUSP00000065983	Mapk14,Mapk3,Mapk1
KEGG	mmu04723	Retrograde endocannabinoid signaling	3	143	1.17	0.0046	10090.ENSMUSP00000004990,10090.ENSMUSP00000051619,10090.ENSMUSP00000065983	Mapk14,Mapk3,Mapk1
KEGG	mmu05034	Alcoholism	3	147	1.16	0.0048	10090.ENSMUSP00000002487,10090.ENSMUSP00000051619,10090.ENSMUSP00000065983	Braf,Mapk3,Mapk1
KEGG	mmu04150	mTOR signaling pathway	3	156	1.14	0.0056	10090.ENSMUSP00000002487,10090.ENSMUSP00000051619,10090.ENSMUSP00000065983	Braf,Mapk3,Mapk1
KEGG	mmu04934	Cushing syndrome	3	157	1.13	0.0056	10090.ENSMUSP00000002487,10090.ENSMUSP00000051619,10090.ENSMUSP00000065983	Braf,Mapk3,Mapk1
KEGG	mmu04960	Aldosterone-regulated sodium reabsorption	2	38	1.57	0.0056	10090.ENSMUSP00000051619,10090.ENSMUSP00000065983	Mapk3,Mapk1
KEGG	mmu05160	Hepatitis C	3	158	1.13	0.0056	10090.ENSMUSP00000002487,10090.ENSMUSP00000051619,10090.ENSMUSP00000065983	Braf,Mapk3,Mapk1
KEGG	mmu04151	PI3K-Akt signaling pathway	4	355	0.9	0.0058	10090.ENSMUSP00000031280,10090.ENSMUSP00000051619,10090.ENSMUSP00000056752,10090.ENSMUSP00000065983	Fgf5,Mapk3,Fgf4,Mapk1
KEGG	mmu05152	Tuberculosis	3	170	1.1	0.0067	10090.ENSMUSP00000004990,10090.ENSMUSP00000051619,10090.ENSMUSP00000065983	Mapk14,Mapk3,Mapk1
KEGG	mmu04062	Chemokine signaling pathway	3	184	1.06	0.0083	10090.ENSMUSP00000002487,10090.ENSMUSP00000051619,10090.ENSMUSP00000065983	Braf,Mapk3,Mapk1
KEGG	mmu04930	Type II diabetes mellitus	2	48	1.47	0.0083	10090.ENSMUSP00000051619,10090.ENSMUSP00000065983	Mapk3,Mapk1
KEGG	mmu00270	Cysteine and methionine metabolism	2	50	1.45	0.0087	10090.ENSMUSP00000020991,10090.ENSMUSP00000105396	Dnmt3a,Dnmt3b
KEGG	mmu05203	Viral carcinogenesis	3	194	1.04	0.0093	10090.ENSMUSP00000051619,10090.ENSMUSP00000065983,10090.ENSMUSP00000102711	Mapk3,Mapk1,Jun
KEGG	mmu04929	GnRH secretion	2	62	1.36	0.0129	10090.ENSMUSP00000051619,10090.ENSMUSP00000065983	Mapk3,Mapk1
KEGG	mmu05031	Amphetamine addiction	2	63	1.35	0.0131	10090.ENSMUSP00000021674,10090.ENSMUSP00000102711	Fos,Jun
KEGG	mmu04520	Adherens junction	2	69	1.31	0.0154	10090.ENSMUSP00000051619,10090.ENSMUSP00000065983	Mapk3,Mapk1
KEGG	mmu05230	Central carbon metabolism in cancer	2	69	1.31	0.0154	10090.ENSMUSP00000051619,10090.ENSMUSP00000065983	Mapk3,Mapk1
KEGG	mmu01524	Platinum drug resistance	2	77	1.27	0.0186	10090.ENSMUSP00000051619,10090.ENSMUSP00000065983	Mapk3,Mapk1
KEGG	mmu05020	Prion disease	3	264	0.91	0.0205	10090.ENSMUSP00000004990,10090.ENSMUSP00000051619,10090.ENSMUSP00000065983	Mapk14,Mapk3,Mapk1
KEGG	mmu04666	Fc gamma R-mediated phagocytosis	2	85	1.22	0.022	10090.ENSMUSP00000051619,10090.ENSMUSP00000065983	Mapk3,Mapk1
KEGG	mmu05323	Rheumatoid arthritis	2	86	1.22	0.0223	10090.ENSMUSP00000021674,10090.ENSMUSP00000102711	Fos,Jun
KEGG	mmu04350	TGF-beta signaling pathway	2	95	1.18	0.0266	10090.ENSMUSP00000051619,10090.ENSMUSP00000065983	Mapk3,Mapk1
KEGG	mmu04916	Melanogenesis	2	95	1.18	0.0266	10090.ENSMUSP00000051619,10090.ENSMUSP00000065983	Mapk3,Mapk1
KEGG	mmu04066	HIF-1 signaling pathway	2	111	1.11	0.035	10090.ENSMUSP00000051619,10090.ENSMUSP00000065983	Mapk3,Mapk1
KEGG	mmu04724	Glutamatergic synapse	2	111	1.11	0.035	10090.ENSMUSP00000051619,10090.ENSMUSP00000065983	Mapk3,Mapk1
KEGG	mmu04919	Thyroid hormone signaling pathway	2	119	1.08	0.0391	10090.ENSMUSP00000051619,10090.ENSMUSP00000065983	Mapk3,Mapk1
KEGG	mmu04728	Dopaminergic synapse	2	127	1.05	0.0434	10090.ENSMUSP00000004990,10090.ENSMUSP00000021674	Mapk14,Fos
KEGG	mmu05010	Alzheimer disease	3	359	0.77	0.0434	10090.ENSMUSP00000002487,10090.ENSMUSP00000051619,10090.ENSMUSP00000065983	Braf,Mapk3,Mapk1
KEGG	mmu04371	Apelin signaling pathway	2	133	1.03	0.0468	10090.ENSMUSP00000051619,10090.ENSMUSP00000065983	Mapk3,Mapk1
KEGG	mmu04140	Autophagy - animal	2	137	1.02	0.049	10090.ENSMUSP00000051619,10090.ENSMUSP00000065983	Mapk3,Mapk1
Reactome	MMU-450282	MAPK targets/ Nuclear events mediated by MAP kinases	7	27	2.27	4.41e-11	10090.ENSMUSP00000004990,10090.ENSMUSP00000020118,10090.ENSMUSP00000021674,10090.ENSMUSP00000033930,10090.ENSMUSP00000051619,10090.ENSMUSP00000065983,10090.ENSMUSP00000102711	Mapk14,Dusp6,Fos,Dusp4,Mapk3,Mapk1,Jun
Reactome	MMU-5654732	Negative regulation of FGFR3 signaling	6	29	2.17	2.93e-09	10090.ENSMUSP00000002487,10090.ENSMUSP00000022709,10090.ENSMUSP00000031280,10090.ENSMUSP00000051619,10090.ENSMUSP00000056752,10090.ENSMUSP00000065983	Braf,Spry2,Fgf5,Mapk3,Fgf4,Mapk1
Reactome	MMU-450341	Activation of the AP-1 family of transcription factors	5	10	2.55	3.75e-09	10090.ENSMUSP00000004990,10090.ENSMUSP00000021674,10090.ENSMUSP00000051619,10090.ENSMUSP00000065983,10090.ENSMUSP00000102711	Mapk14,Fos,Mapk3,Mapk1,Jun
Reactome	MMU-5654726	Negative regulation of FGFR1 signaling	6	32	2.13	3.75e-09	10090.ENSMUSP00000002487,10090.ENSMUSP00000022709,10090.ENSMUSP00000031280,10090.ENSMUSP00000051619,10090.ENSMUSP00000056752,10090.ENSMUSP00000065983	Braf,Spry2,Fgf5,Mapk3,Fgf4,Mapk1
Reactome	MMU-5654727	Negative regulation of FGFR2 signaling	6	34	2.1	3.75e-09	10090.ENSMUSP00000002487,10090.ENSMUSP00000022709,10090.ENSMUSP00000031280,10090.ENSMUSP00000051619,10090.ENSMUSP00000056752,10090.ENSMUSP00000065983	Braf,Spry2,Fgf5,Mapk3,Fgf4,Mapk1
Reactome	MMU-198753	ERK/MAPK targets	5	18	2.3	8.92e-09	10090.ENSMUSP00000004990,10090.ENSMUSP00000020118,10090.ENSMUSP00000033930,10090.ENSMUSP00000051619,10090.ENSMUSP00000065983	Mapk14,Dusp6,Dusp4,Mapk3,Mapk1
Reactome	MMU-5683057	MAPK family signaling cascades	9	297	1.33	1.61e-08	10090.ENSMUSP00000002487,10090.ENSMUSP00000017868,10090.ENSMUSP00000020118,10090.ENSMUSP00000031280,10090.ENSMUSP00000033930,10090.ENSMUSP00000036076,10090.ENSMUSP00000051619,10090.ENSMUSP00000056752,10090.ENSMUSP00000065983	Braf,Etv4,Dusp6,Fgf5,Dusp4,Il17rd,Mapk3,Fgf4,Mapk1
Reactome	MMU-2559583	Cellular Senescence	7	124	1.6	3.09e-08	10090.ENSMUSP00000004990,10090.ENSMUSP00000021674,10090.ENSMUSP00000023612,10090.ENSMUSP00000034534,10090.ENSMUSP00000051619,10090.ENSMUSP00000065983,10090.ENSMUSP00000102711	Mapk14,Fos,Ets2,Ets1,Mapk3,Mapk1,Jun
Reactome	MMU-187037	Signaling by NTRK1 (TRKA)	6	64	1.82	3.26e-08	10090.ENSMUSP00000002487,10090.ENSMUSP00000004990,10090.ENSMUSP00000020118,10090.ENSMUSP00000033930,10090.ENSMUSP00000051619,10090.ENSMUSP00000065983	Braf,Mapk14,Dusp6,Dusp4,Mapk3,Mapk1
Reactome	MMU-5654733	Negative regulation of FGFR4 signaling	5	31	2.06	7.43e-08	10090.ENSMUSP00000002487,10090.ENSMUSP00000022709,10090.ENSMUSP00000051619,10090.ENSMUSP00000056752,10090.ENSMUSP00000065983	Braf,Spry2,Mapk3,Fgf4,Mapk1
Reactome	MMU-2559580	Oxidative Stress Induced Senescence	5	37	1.98	1.45e-07	10090.ENSMUSP00000004990,10090.ENSMUSP00000021674,10090.ENSMUSP00000051619,10090.ENSMUSP00000065983,10090.ENSMUSP00000102711	Mapk14,Fos,Mapk3,Mapk1,Jun
Reactome	MMU-5673001	RAF/MAP kinase cascade	8	266	1.33	1.45e-07	10090.ENSMUSP00000002487,10090.ENSMUSP00000020118,10090.ENSMUSP00000031280,10090.ENSMUSP00000033930,10090.ENSMUSP00000036076,10090.ENSMUSP00000051619,10090.ENSMUSP00000056752,10090.ENSMUSP00000065983	Braf,Dusp6,Fgf5,Dusp4,Il17rd,Mapk3,Fgf4,Mapk1
Reactome	MMU-9006934	Signaling by Receptor Tyrosine Kinases	9	418	1.19	2.05e-07	10090.ENSMUSP00000002487,10090.ENSMUSP00000004990,10090.ENSMUSP00000020118,10090.ENSMUSP00000022709,10090.ENSMUSP00000031280,10090.ENSMUSP00000033930,10090.ENSMUSP00000051619,10090.ENSMUSP00000056752,10090.ENSMUSP00000065983	Braf,Mapk14,Dusp6,Spry2,Fgf5,Dusp4,Mapk3,Fgf4,Mapk1
Reactome	MMU-202670	ERKs are inactivated	4	12	2.37	2.32e-07	10090.ENSMUSP00000020118,10090.ENSMUSP00000033930,10090.ENSMUSP00000051619,10090.ENSMUSP00000065983	Dusp6,Dusp4,Mapk3,Mapk1
Reactome	MMU-5675221	Negative regulation of MAPK pathway	5	42	1.93	2.32e-07	10090.ENSMUSP00000002487,10090.ENSMUSP00000020118,10090.ENSMUSP00000033930,10090.ENSMUSP00000051619,10090.ENSMUSP00000065983	Braf,Dusp6,Dusp4,Mapk3,Mapk1
Reactome	MMU-1295596	Spry regulation of FGF signaling	4	16	2.25	5.85e-07	10090.ENSMUSP00000002487,10090.ENSMUSP00000022709,10090.ENSMUSP00000051619,10090.ENSMUSP00000065983	Braf,Spry2,Mapk3,Mapk1
Reactome	MMU-2559585	Oncogene Induced Senescence	4	16	2.25	5.85e-07	10090.ENSMUSP00000023612,10090.ENSMUSP00000034534,10090.ENSMUSP00000051619,10090.ENSMUSP00000065983	Ets2,Ets1,Mapk3,Mapk1
Reactome	MMU-112409	RAF-independent MAPK1/3 activation	4	23	2.09	2.01e-06	10090.ENSMUSP00000020118,10090.ENSMUSP00000033930,10090.ENSMUSP00000051619,10090.ENSMUSP00000065983	Dusp6,Dusp4,Mapk3,Mapk1
Reactome	MMU-187687	Signalling to ERKs	4	27	2.02	3.43e-06	10090.ENSMUSP00000002487,10090.ENSMUSP00000004990,10090.ENSMUSP00000051619,10090.ENSMUSP00000065983	Braf,Mapk14,Mapk3,Mapk1
Reactome	MMU-5674499	Negative feedback regulation of MAPK pathway	3	6	2.55	7.21e-06	10090.ENSMUSP00000002487,10090.ENSMUSP00000051619,10090.ENSMUSP00000065983	Braf,Mapk3,Mapk1
Reactome	MMU-2871796	FCERI mediated MAPK activation	4	34	1.92	7.66e-06	10090.ENSMUSP00000021674,10090.ENSMUSP00000051619,10090.ENSMUSP00000065983,10090.ENSMUSP00000102711	Fos,Mapk3,Mapk1,Jun
Reactome	MMU-5674135	MAP2K and MAPK activation	4	40	1.85	1.37e-05	10090.ENSMUSP00000002487,10090.ENSMUSP00000036076,10090.ENSMUSP00000051619,10090.ENSMUSP00000065983	Braf,Il17rd,Mapk3,Mapk1
Reactome	MMU-74751	Insulin receptor signalling cascade	4	51	1.75	3.28e-05	10090.ENSMUSP00000031280,10090.ENSMUSP00000051619,10090.ENSMUSP00000056752,10090.ENSMUSP00000065983	Fgf5,Mapk3,Fgf4,Mapk1
Reactome	MMU-170968	Frs2-mediated activation	3	12	2.25	3.51e-05	10090.ENSMUSP00000002487,10090.ENSMUSP00000051619,10090.ENSMUSP00000065983	Braf,Mapk3,Mapk1
Reactome	MMU-5668599	RHO GTPases Activate NADPH Oxidases	3	24	1.95	0.0002	10090.ENSMUSP00000004990,10090.ENSMUSP00000051619,10090.ENSMUSP00000065983	Mapk14,Mapk3,Mapk1
Reactome	MMU-6811558	PI5P, PP2A and IER3 Regulate PI3K/AKT Signaling	4	101	1.45	0.00038	10090.ENSMUSP00000031280,10090.ENSMUSP00000051619,10090.ENSMUSP00000056752,10090.ENSMUSP00000065983	Fgf5,Mapk3,Fgf4,Mapk1
Reactome	MMU-9627069	Regulation of the apoptosome activity	2	9	2.2	0.0028	10090.ENSMUSP00000051619,10090.ENSMUSP00000065983	Mapk3,Mapk1
Reactome	MMU-162658	Golgi Cisternae Pericentriolar Stack Reorganization	2	10	2.15	0.0032	10090.ENSMUSP00000051619,10090.ENSMUSP00000065983	Mapk3,Mapk1
Reactome	MMU-74749	Signal attenuation	2	10	2.15	0.0032	10090.ENSMUSP00000051619,10090.ENSMUSP00000065983	Mapk3,Mapk1
Reactome	MMU-190373	FGFR1c ligand binding and activation	2	11	2.11	0.0037	10090.ENSMUSP00000031280,10090.ENSMUSP00000056752	Fgf5,Fgf4
Reactome	MMU-982772	Growth hormone receptor signaling	2	12	2.07	0.0042	10090.ENSMUSP00000051619,10090.ENSMUSP00000065983	Mapk3,Mapk1
Reactome	MMU-190372	FGFR3c ligand binding and activation	2	13	2.04	0.0047	10090.ENSMUSP00000031280,10090.ENSMUSP00000056752	Fgf5,Fgf4
Reactome	MMU-190375	FGFR2c ligand binding and activation	2	13	2.04	0.0047	10090.ENSMUSP00000031280,10090.ENSMUSP00000056752	Fgf5,Fgf4
Reactome	MMU-5654227	Phospholipase C-mediated cascade; FGFR3	2	13	2.04	0.0047	10090.ENSMUSP00000031280,10090.ENSMUSP00000056752	Fgf5,Fgf4
Reactome	MMU-5658623	FGFRL1 modulation of FGFR1 signaling	2	13	2.04	0.0047	10090.ENSMUSP00000031280,10090.ENSMUSP00000056752	Fgf5,Fgf4
Reactome	MMU-162582	Signal Transduction	11	2417	0.51	0.0062	10090.ENSMUSP00000002487,10090.ENSMUSP00000004990,10090.ENSMUSP00000017868,10090.ENSMUSP00000020118,10090.ENSMUSP00000022709,10090.ENSMUSP00000031280,10090.ENSMUSP00000033930,10090.ENSMUSP00000036076,10090.ENSMUSP00000051619,10090.ENSMUSP00000056752,10090.ENSMUSP00000065983	Braf,Mapk14,Etv4,Dusp6,Spry2,Fgf5,Dusp4,Il17rd,Mapk3,Fgf4,Mapk1
Reactome	MMU-5654219	Phospholipase C-mediated cascade: FGFR1	2	16	1.95	0.0062	10090.ENSMUSP00000031280,10090.ENSMUSP00000056752	Fgf5,Fgf4
Reactome	MMU-5654221	Phospholipase C-mediated cascade; FGFR2	2	18	1.9	0.0073	10090.ENSMUSP00000031280,10090.ENSMUSP00000056752	Fgf5,Fgf4
Reactome	MMU-5654704	SHC-mediated cascade:FGFR3	2	18	1.9	0.0073	10090.ENSMUSP00000031280,10090.ENSMUSP00000056752	Fgf5,Fgf4
Reactome	MMU-5654710	PI-3K cascade:FGFR3	2	18	1.9	0.0073	10090.ENSMUSP00000031280,10090.ENSMUSP00000056752	Fgf5,Fgf4
Reactome	MMU-881907	Gastrin-CREB signalling pathway via PKC and MAPK	2	18	1.9	0.0073	10090.ENSMUSP00000051619,10090.ENSMUSP00000065983	Mapk3,Mapk1
Reactome	MMU-5654706	FRS-mediated FGFR3 signaling	2	20	1.85	0.0084	10090.ENSMUSP00000031280,10090.ENSMUSP00000056752	Fgf5,Fgf4
Reactome	MMU-445144	Signal transduction by L1	2	21	1.83	0.009	10090.ENSMUSP00000051619,10090.ENSMUSP00000065983	Mapk3,Mapk1
Reactome	MMU-5654688	SHC-mediated cascade:FGFR1	2	21	1.83	0.009	10090.ENSMUSP00000031280,10090.ENSMUSP00000056752	Fgf5,Fgf4
Reactome	MMU-5654689	PI-3K cascade:FGFR1	2	21	1.83	0.009	10090.ENSMUSP00000031280,10090.ENSMUSP00000056752	Fgf5,Fgf4
Reactome	MMU-5654693	FRS-mediated FGFR1 signaling	2	23	1.79	0.0102	10090.ENSMUSP00000031280,10090.ENSMUSP00000056752	Fgf5,Fgf4
Reactome	MMU-5654695	PI-3K cascade:FGFR2	2	23	1.79	0.0102	10090.ENSMUSP00000031280,10090.ENSMUSP00000056752	Fgf5,Fgf4
Reactome	MMU-5654699	SHC-mediated cascade:FGFR2	2	23	1.79	0.0102	10090.ENSMUSP00000031280,10090.ENSMUSP00000056752	Fgf5,Fgf4
Reactome	MMU-5654700	FRS-mediated FGFR2 signaling	2	25	1.76	0.0115	10090.ENSMUSP00000031280,10090.ENSMUSP00000056752	Fgf5,Fgf4
Reactome	MMU-456926	Thrombin signalling through proteinase activated receptors (PARs)	2	32	1.65	0.0176	10090.ENSMUSP00000051619,10090.ENSMUSP00000065983	Mapk3,Mapk1
Reactome	MMU-5663213	RHO GTPases Activate WASPs and WAVEs	2	34	1.62	0.0195	10090.ENSMUSP00000051619,10090.ENSMUSP00000065983	Mapk3,Mapk1
Reactome	MMU-375165	NCAM signaling for neurite out-growth	2	39	1.56	0.0247	10090.ENSMUSP00000051619,10090.ENSMUSP00000065983	Mapk3,Mapk1
Reactome	MMU-212300	PRC2 methylates histones and DNA	2	40	1.55	0.0257	10090.ENSMUSP00000020991,10090.ENSMUSP00000105396	Dnmt3a,Dnmt3b
Reactome	MMU-2559582	Senescence-Associated Secretory Phenotype (SASP)	2	40	1.55	0.0257	10090.ENSMUSP00000051619,10090.ENSMUSP00000065983	Mapk3,Mapk1
Reactome	MMU-109704	PI3K Cascade	2	44	1.51	0.0302	10090.ENSMUSP00000031280,10090.ENSMUSP00000056752	Fgf5,Fgf4
WikiPathways	WP3654	Novel Jun-Dmp1 pathway	8	26	2.34	1.98e-14	10090.ENSMUSP00000002487,10090.ENSMUSP00000021674,10090.ENSMUSP00000023612,10090.ENSMUSP00000034534,10090.ENSMUSP00000051619,10090.ENSMUSP00000064680,10090.ENSMUSP00000065983,10090.ENSMUSP00000102711	Braf,Fos,Ets2,Ets1,Mapk3,Junb,Mapk1,Jun
WikiPathways	WP493	Mapk signaling pathway	10	158	1.65	1.9e-12	10090.ENSMUSP00000002487,10090.ENSMUSP00000004990,10090.ENSMUSP00000009550,10090.ENSMUSP00000020118,10090.ENSMUSP00000021674,10090.ENSMUSP00000033930,10090.ENSMUSP00000051619,10090.ENSMUSP00000056752,10090.ENSMUSP00000065983,10090.ENSMUSP00000102711	Braf,Mapk14,Elk1,Dusp6,Fos,Dusp4,Mapk3,Fgf4,Mapk1,Jun
WikiPathways	WP251	Mapk cascade	7	28	2.25	2.24e-12	10090.ENSMUSP00000002487,10090.ENSMUSP00000004990,10090.ENSMUSP00000009550,10090.ENSMUSP00000051619,10090.ENSMUSP00000065983,10090.ENSMUSP00000094326,10090.ENSMUSP00000102711	Braf,Mapk14,Elk1,Mapk3,Mapk1,Map3k2,Jun
WikiPathways	WP572	EGFR1 signaling pathway	8	173	1.52	5.81e-09	10090.ENSMUSP00000004990,10090.ENSMUSP00000009550,10090.ENSMUSP00000021674,10090.ENSMUSP00000022709,10090.ENSMUSP00000051619,10090.ENSMUSP00000065983,10090.ENSMUSP00000094326,10090.ENSMUSP00000102711	Mapk14,Elk1,Fos,Spry2,Mapk3,Mapk1,Map3k2,Jun
WikiPathways	WP339	ESC pluripotency pathways	7	116	1.63	1.31e-08	10090.ENSMUSP00000002487,10090.ENSMUSP00000009550,10090.ENSMUSP00000021674,10090.ENSMUSP00000031280,10090.ENSMUSP00000056752,10090.ENSMUSP00000065983,10090.ENSMUSP00000102711	Braf,Elk1,Fos,Fgf5,Fgf4,Mapk1,Jun
WikiPathways	WP1244	Estrogen signaling	6	75	1.76	4.56e-08	10090.ENSMUSP00000002487,10090.ENSMUSP00000004990,10090.ENSMUSP00000009550,10090.ENSMUSP00000021674,10090.ENSMUSP00000065983,10090.ENSMUSP00000102711	Braf,Mapk14,Elk1,Fos,Mapk1,Jun
WikiPathways	WP193	Hepatocyte growth factor receptor signaling	5	34	2.02	6.12e-08	10090.ENSMUSP00000009550,10090.ENSMUSP00000021674,10090.ENSMUSP00000051619,10090.ENSMUSP00000065983,10090.ENSMUSP00000102711	Elk1,Fos,Mapk3,Mapk1,Jun
WikiPathways	WP65	Insulin signaling	7	158	1.5	6.41e-08	10090.ENSMUSP00000004990,10090.ENSMUSP00000009550,10090.ENSMUSP00000021674,10090.ENSMUSP00000051619,10090.ENSMUSP00000065983,10090.ENSMUSP00000094326,10090.ENSMUSP00000102711	Mapk14,Elk1,Fos,Mapk3,Mapk1,Map3k2,Jun
WikiPathways	WP1763	PluriNetWork: mechanisms associated with pluripotency	8	287	1.3	1.23e-07	10090.ENSMUSP00000020991,10090.ENSMUSP00000021674,10090.ENSMUSP00000031280,10090.ENSMUSP00000051619,10090.ENSMUSP00000056752,10090.ENSMUSP00000065983,10090.ENSMUSP00000105396,10090.ENSMUSP00000133279	Dnmt3a,Fos,Fgf5,Mapk3,Fgf4,Mapk1,Dnmt3b,Tet1
WikiPathways	WP151	IL-5 signaling pathway	5	67	1.72	1.01e-06	10090.ENSMUSP00000004990,10090.ENSMUSP00000009550,10090.ENSMUSP00000051619,10090.ENSMUSP00000065983,10090.ENSMUSP00000102711	Mapk14,Elk1,Mapk3,Mapk1,Jun
WikiPathways	WP450	IL-2 signaling pathway	5	75	1.68	1.56e-06	10090.ENSMUSP00000004990,10090.ENSMUSP00000023612,10090.ENSMUSP00000034534,10090.ENSMUSP00000051619,10090.ENSMUSP00000065983	Mapk14,Ets2,Ets1,Mapk3,Mapk1
WikiPathways	WP387	IL-6 signaling pathway	5	98	1.56	5.1e-06	10090.ENSMUSP00000004990,10090.ENSMUSP00000021674,10090.ENSMUSP00000051619,10090.ENSMUSP00000065983,10090.ENSMUSP00000102711	Mapk14,Fos,Mapk3,Mapk1,Jun
WikiPathways	WP523	Regulation of actin cytoskeleton	5	150	1.37	3.57e-05	10090.ENSMUSP00000002487,10090.ENSMUSP00000031280,10090.ENSMUSP00000051619,10090.ENSMUSP00000056752,10090.ENSMUSP00000065983	Braf,Fgf5,Mapk3,Fgf4,Mapk1
WikiPathways	WP373	IL-3 signaling pathway	4	98	1.46	0.00016	10090.ENSMUSP00000002180,10090.ENSMUSP00000004990,10090.ENSMUSP00000051619,10090.ENSMUSP00000065983	Spi1,Mapk14,Mapk3,Mapk1
WikiPathways	WP412	Oxidative stress response	3	28	1.88	0.00016	10090.ENSMUSP00000004990,10090.ENSMUSP00000021674,10090.ENSMUSP00000064680	Mapk14,Fos,Junb
WikiPathways	WP1261	ErbB signaling pathway	3	45	1.68	0.00051	10090.ENSMUSP00000009550,10090.ENSMUSP00000065983,10090.ENSMUSP00000102711	Elk1,Mapk1,Jun
WikiPathways	WP113	TGF-beta signaling pathway	3	50	1.63	0.00065	10090.ENSMUSP00000021674,10090.ENSMUSP00000051619,10090.ENSMUSP00000102711	Fos,Mapk3,Jun
WikiPathways	WP85	Focal adhesion	4	183	1.19	0.0014	10090.ENSMUSP00000002487,10090.ENSMUSP00000009550,10090.ENSMUSP00000065983,10090.ENSMUSP00000102711	Braf,Elk1,Mapk1,Jun
WikiPathways	WP1560	MicroRNAs in cardiomyocyte hypertrophy	3	82	1.42	0.0024	10090.ENSMUSP00000004990,10090.ENSMUSP00000051619,10090.ENSMUSP00000065983	Mapk14,Mapk3,Mapk1
WikiPathways	WP265	Delta-Notch signaling pathway	3	82	1.42	0.0024	10090.ENSMUSP00000051619,10090.ENSMUSP00000065983,10090.ENSMUSP00000102711	Mapk3,Mapk1,Jun
WikiPathways	WP2432	Spinal cord injury	3	99	1.33	0.0037	10090.ENSMUSP00000021674,10090.ENSMUSP00000051619,10090.ENSMUSP00000065983	Fos,Mapk3,Mapk1
WikiPathways	WP3663	BMP signaling pathway in eyelid development	2	20	1.85	0.0039	10090.ENSMUSP00000051619,10090.ENSMUSP00000102711	Mapk3,Jun
WikiPathways	WP539	Wnt signaling pathway (NetPath)	3	106	1.3	0.0041	10090.ENSMUSP00000051619,10090.ENSMUSP00000065983,10090.ENSMUSP00000102711	Mapk3,Mapk1,Jun
WikiPathways	WP57	Signal transduction of S1P receptor	2	22	1.81	0.0043	10090.ENSMUSP00000051619,10090.ENSMUSP00000065983	Mapk3,Mapk1
WikiPathways	WP10	IL-9 signaling pathway	2	23	1.79	0.0044	10090.ENSMUSP00000051619,10090.ENSMUSP00000065983	Mapk3,Mapk1
WikiPathways	WP1249	EPO receptor signaling	2	26	1.74	0.0054	10090.ENSMUSP00000051619,10090.ENSMUSP00000065983	Mapk3,Mapk1
WikiPathways	WP435	One-carbon metabolism	2	29	1.69	0.0063	10090.ENSMUSP00000020991,10090.ENSMUSP00000105396	Dnmt3a,Dnmt3b
WikiPathways	WP1246	Hypothetical network for drug addiction	2	31	1.66	0.0069	10090.ENSMUSP00000051619,10090.ENSMUSP00000065983	Mapk3,Mapk1
WikiPathways	WP730	Glutathione and one-carbon metabolism	2	31	1.66	0.0069	10090.ENSMUSP00000020991,10090.ENSMUSP00000105396	Dnmt3a,Dnmt3b
WikiPathways	WP350	p38 Mapk signaling pathway	2	33	1.63	0.0073	10090.ENSMUSP00000004990,10090.ENSMUSP00000009550	Mapk14,Elk1
WikiPathways	WP385	Myometrial relaxation and contraction pathways	3	151	1.15	0.0083	10090.ENSMUSP00000021674,10090.ENSMUSP00000023612,10090.ENSMUSP00000102711	Fos,Ets2,Jun
WikiPathways	WP37	IL-1 signaling pathway	2	37	1.58	0.0085	10090.ENSMUSP00000051619,10090.ENSMUSP00000065983	Mapk3,Mapk1
WikiPathways	WP297	IL-7 signaling pathway	2	43	1.52	0.0109	10090.ENSMUSP00000051619,10090.ENSMUSP00000065983	Mapk3,Mapk1
WikiPathways	WP108	Selenium metabolism / selenoproteins	2	47	1.48	0.012	10090.ENSMUSP00000021674,10090.ENSMUSP00000102711	Fos,Jun
WikiPathways	WP2292	Chemokine signaling pathway	3	178	1.08	0.012	10090.ENSMUSP00000002487,10090.ENSMUSP00000051619,10090.ENSMUSP00000065983	Braf,Mapk3,Mapk1
WikiPathways	WP2910	Mecp2 and associated Rett syndrome	2	46	1.49	0.012	10090.ENSMUSP00000056752,10090.ENSMUSP00000133279	Fgf4,Tet1
WikiPathways	WP512	Id signaling pathway	2	51	1.45	0.0135	10090.ENSMUSP00000008542,10090.ENSMUSP00000009550	Elk3,Elk1
WikiPathways	WP2075	Alzheimers disease	2	74	1.28	0.0266	10090.ENSMUSP00000051619,10090.ENSMUSP00000065983	Mapk3,Mapk1
WikiPathways	WP6	Integrin-mediated cell adhesion	2	99	1.16	0.0449	10090.ENSMUSP00000002487,10090.ENSMUSP00000065983	Braf,Mapk1
Monarch MPO	MP:0005621	Abnormal cell physiology	21	3641	0.61	2.72e-06	10090.ENSMUSP00000002180,10090.ENSMUSP00000002487,10090.ENSMUSP00000004990,10090.ENSMUSP00000009550,10090.ENSMUSP00000020118,10090.ENSMUSP00000021674,10090.ENSMUSP00000033930,10090.ENSMUSP00000034534,10090.ENSMUSP00000051619,10090.ENSMUSP00000056752,10090.ENSMUSP00000064680,10090.ENSMUSP00000065983,10090.ENSMUSP00000087049,10090.ENSMUSP00000093442,10090.ENSMUSP00000094326,10090.ENSMUSP00000096203…	Spi1,Braf,Mapk14,Elk1,Dusp6,Fos,Dusp4,Ets1,Mapk3,Fgf4,Junb,Mapk1,Tet3,Etv1,Map3k2,Tet2,Jun,Etv2,Dnmt3b,Elf4,Tet1
Monarch MPO	MP:0000350	Abnormal cell proliferation	13	1328	0.84	2.53e-05	10090.ENSMUSP00000002180,10090.ENSMUSP00000002487,10090.ENSMUSP00000004990,10090.ENSMUSP00000021674,10090.ENSMUSP00000033930,10090.ENSMUSP00000034534,10090.ENSMUSP00000051619,10090.ENSMUSP00000056752,10090.ENSMUSP00000065983,10090.ENSMUSP00000094326,10090.ENSMUSP00000102711,10090.ENSMUSP00000110608,10090.ENSMUSP00000133279	Spi1,Braf,Mapk14,Fos,Dusp4,Ets1,Mapk3,Fgf4,Mapk1,Map3k2,Jun,Elf4,Tet1
Monarch MPO	MP:0005390	Skeleton phenotype	16	2236	0.71	2.53e-05	10090.ENSMUSP00000002180,10090.ENSMUSP00000002487,10090.ENSMUSP00000004990,10090.ENSMUSP00000017868,10090.ENSMUSP00000020118,10090.ENSMUSP00000020991,10090.ENSMUSP00000021674,10090.ENSMUSP00000022709,10090.ENSMUSP00000025295,10090.ENSMUSP00000033930,10090.ENSMUSP00000056752,10090.ENSMUSP00000064680,10090.ENSMUSP00000065983,10090.ENSMUSP00000102711,10090.ENSMUSP00000105396,10090.ENSMUSP00000133279	Spi1,Braf,Mapk14,Etv4,Dusp6,Dnmt3a,Fos,Spry2,Spry4,Dusp4,Fgf4,Junb,Mapk1,Jun,Dnmt3b,Tet1
Monarch MPO	MP:0011181	Increased hematopoietic cell number	12	1053	0.91	2.53e-05	10090.ENSMUSP00000002180,10090.ENSMUSP00000002487,10090.ENSMUSP00000004990,10090.ENSMUSP00000020991,10090.ENSMUSP00000021674,10090.ENSMUSP00000033930,10090.ENSMUSP00000034534,10090.ENSMUSP00000064680,10090.ENSMUSP00000065983,10090.ENSMUSP00000096203,10090.ENSMUSP00000105396,10090.ENSMUSP00000110608	Spi1,Braf,Mapk14,Dnmt3a,Fos,Dusp4,Ets1,Junb,Mapk1,Tet2,Dnmt3b,Elf4
Monarch MPO	MP:0005508	Abnormal skeleton morphology	15	2035	0.72	2.9e-05	10090.ENSMUSP00000002180,10090.ENSMUSP00000002487,10090.ENSMUSP00000004990,10090.ENSMUSP00000017868,10090.ENSMUSP00000020118,10090.ENSMUSP00000020991,10090.ENSMUSP00000021674,10090.ENSMUSP00000022709,10090.ENSMUSP00000025295,10090.ENSMUSP00000033930,10090.ENSMUSP00000064680,10090.ENSMUSP00000065983,10090.ENSMUSP00000102711,10090.ENSMUSP00000105396,10090.ENSMUSP00000133279	Spi1,Braf,Mapk14,Etv4,Dusp6,Dnmt3a,Fos,Spry2,Spry4,Dusp4,Junb,Mapk1,Jun,Dnmt3b,Tet1
Monarch MPO	MP:0020981	Abnormal immune system development	10	679	1.02	2.9e-05	10090.ENSMUSP00000002180,10090.ENSMUSP00000002487,10090.ENSMUSP00000004990,10090.ENSMUSP00000021674,10090.ENSMUSP00000034534,10090.ENSMUSP00000065983,10090.ENSMUSP00000096203,10090.ENSMUSP00000103782,10090.ENSMUSP00000105396,10090.ENSMUSP00000110608	Spi1,Braf,Mapk14,Fos,Ets1,Mapk1,Tet2,Etv2,Dnmt3b,Elf4
Monarch MPO	MP:0001545	Abnormal hematopoietic system physiology	13	1448	0.81	3.2e-05	10090.ENSMUSP00000002180,10090.ENSMUSP00000002487,10090.ENSMUSP00000004990,10090.ENSMUSP00000021674,10090.ENSMUSP00000033930,10090.ENSMUSP00000034534,10090.ENSMUSP00000051619,10090.ENSMUSP00000065983,10090.ENSMUSP00000094326,10090.ENSMUSP00000096203,10090.ENSMUSP00000103782,10090.ENSMUSP00000105396,10090.ENSMUSP00000110608	Spi1,Braf,Mapk14,Fos,Dusp4,Ets1,Mapk3,Mapk1,Map3k2,Tet2,Etv2,Dnmt3b,Elf4
Monarch MPO	MP:0002082	Postnatal lethality	12	1198	0.85	3.26e-05	10090.ENSMUSP00000002180,10090.ENSMUSP00000002487,10090.ENSMUSP00000004990,10090.ENSMUSP00000008542,10090.ENSMUSP00000020118,10090.ENSMUSP00000020991,10090.ENSMUSP00000022709,10090.ENSMUSP00000025295,10090.ENSMUSP00000034534,10090.ENSMUSP00000096203,10090.ENSMUSP00000102711,10090.ENSMUSP00000105396	Spi1,Braf,Mapk14,Elk3,Dusp6,Dnmt3a,Spry2,Spry4,Ets1,Tet2,Jun,Dnmt3b
Monarch MPO	MP:0002145	Abnormal t cell differentiation	8	364	1.19	3.26e-05	10090.ENSMUSP00000002180,10090.ENSMUSP00000004990,10090.ENSMUSP00000021674,10090.ENSMUSP00000034534,10090.ENSMUSP00000065983,10090.ENSMUSP00000096203,10090.ENSMUSP00000105396,10090.ENSMUSP00000110608	Spi1,Mapk14,Fos,Ets1,Mapk1,Tet2,Dnmt3b,Elf4
Monarch MPO	MP:0000717	Abnormal lymphocyte cell number	11	965	0.91	3.51e-05	10090.ENSMUSP00000002180,10090.ENSMUSP00000002487,10090.ENSMUSP00000004990,10090.ENSMUSP00000021674,10090.ENSMUSP00000033930,10090.ENSMUSP00000034534,10090.ENSMUSP00000064680,10090.ENSMUSP00000065983,10090.ENSMUSP00000096203,10090.ENSMUSP00000105396,10090.ENSMUSP00000110608	Spi1,Braf,Mapk14,Fos,Dusp4,Ets1,Junb,Mapk1,Tet2,Dnmt3b,Elf4
Monarch MPO	MP:0006387	Abnormal t cell number	10	740	0.98	3.51e-05	10090.ENSMUSP00000002180,10090.ENSMUSP00000002487,10090.ENSMUSP00000004990,10090.ENSMUSP00000021674,10090.ENSMUSP00000033930,10090.ENSMUSP00000034534,10090.ENSMUSP00000065983,10090.ENSMUSP00000096203,10090.ENSMUSP00000105396,10090.ENSMUSP00000110608	Spi1,Braf,Mapk14,Fos,Dusp4,Ets1,Mapk1,Tet2,Dnmt3b,Elf4
Monarch MPO	MP:0002444	Abnormal t cell physiology	9	582	1.04	5.26e-05	10090.ENSMUSP00000002487,10090.ENSMUSP00000004990,10090.ENSMUSP00000033930,10090.ENSMUSP00000034534,10090.ENSMUSP00000051619,10090.ENSMUSP00000065983,10090.ENSMUSP00000094326,10090.ENSMUSP00000105396,10090.ENSMUSP00000110608	Braf,Mapk14,Dusp4,Ets1,Mapk3,Mapk1,Map3k2,Dnmt3b,Elf4
Monarch MPO	MP:0005397	Hematopoietic system phenotype	18	3444	0.57	5.26e-05	10090.ENSMUSP00000002180,10090.ENSMUSP00000002487,10090.ENSMUSP00000004990,10090.ENSMUSP00000008542,10090.ENSMUSP00000020118,10090.ENSMUSP00000020991,10090.ENSMUSP00000021674,10090.ENSMUSP00000033930,10090.ENSMUSP00000034534,10090.ENSMUSP00000051619,10090.ENSMUSP00000064680,10090.ENSMUSP00000065983,10090.ENSMUSP00000094326,10090.ENSMUSP00000096203,10090.ENSMUSP00000102711,10090.ENSMUSP00000103782…	Spi1,Braf,Mapk14,Elk3,Dusp6,Dnmt3a,Fos,Dusp4,Ets1,Mapk3,Junb,Mapk1,Map3k2,Tet2,Jun,Etv2,Dnmt3b,Elf4
Monarch MPO	MP:0001711	Abnormal placenta morphology	8	424	1.13	5.88e-05	10090.ENSMUSP00000002487,10090.ENSMUSP00000004990,10090.ENSMUSP00000021674,10090.ENSMUSP00000023612,10090.ENSMUSP00000065983,10090.ENSMUSP00000102711,10090.ENSMUSP00000103782,10090.ENSMUSP00000105396	Braf,Mapk14,Fos,Ets2,Mapk1,Jun,Etv2,Dnmt3b
Monarch MPO	MP:0000351	Increased cell proliferation	8	440	1.11	6.79e-05	10090.ENSMUSP00000002180,10090.ENSMUSP00000002487,10090.ENSMUSP00000004990,10090.ENSMUSP00000021674,10090.ENSMUSP00000033930,10090.ENSMUSP00000034534,10090.ENSMUSP00000094326,10090.ENSMUSP00000110608	Spi1,Braf,Mapk14,Fos,Dusp4,Ets1,Map3k2,Elf4
Monarch MPO	MP:0002123	Abnormal definitive hematopoiesis	10	833	0.93	6.79e-05	10090.ENSMUSP00000002180,10090.ENSMUSP00000004990,10090.ENSMUSP00000020991,10090.ENSMUSP00000021674,10090.ENSMUSP00000034534,10090.ENSMUSP00000065983,10090.ENSMUSP00000096203,10090.ENSMUSP00000103782,10090.ENSMUSP00000105396,10090.ENSMUSP00000110608	Spi1,Mapk14,Dnmt3a,Fos,Ets1,Mapk1,Tet2,Etv2,Dnmt3b,Elf4
Monarch MPO	MP:0003231	Abnormal placenta vasculature	6	171	1.4	6.79e-05	10090.ENSMUSP00000002487,10090.ENSMUSP00000004990,10090.ENSMUSP00000065983,10090.ENSMUSP00000102711,10090.ENSMUSP00000103782,10090.ENSMUSP00000105396	Braf,Mapk14,Mapk1,Jun,Etv2,Dnmt3b
Monarch MPO	MP:0005013	Increased lymphocyte cell number	9	620	1.01	6.79e-05	10090.ENSMUSP00000002180,10090.ENSMUSP00000004990,10090.ENSMUSP00000021674,10090.ENSMUSP00000033930,10090.ENSMUSP00000034534,10090.ENSMUSP00000064680,10090.ENSMUSP00000065983,10090.ENSMUSP00000096203,10090.ENSMUSP00000105396	Spi1,Mapk14,Fos,Dusp4,Ets1,Junb,Mapk1,Tet2,Dnmt3b
Monarch MPO	MP:0010769	Abnormal survival	21	5150	0.46	7.56e-05	10090.ENSMUSP00000002180,10090.ENSMUSP00000002487,10090.ENSMUSP00000004990,10090.ENSMUSP00000008542,10090.ENSMUSP00000020118,10090.ENSMUSP00000020991,10090.ENSMUSP00000021674,10090.ENSMUSP00000022709,10090.ENSMUSP00000023612,10090.ENSMUSP00000025295,10090.ENSMUSP00000034534,10090.ENSMUSP00000051619,10090.ENSMUSP00000056752,10090.ENSMUSP00000064680,10090.ENSMUSP00000065983,10090.ENSMUSP00000093442…	Spi1,Braf,Mapk14,Elk3,Dusp6,Dnmt3a,Fos,Spry2,Ets2,Spry4,Ets1,Mapk3,Fgf4,Junb,Mapk1,Etv1,Tet2,Jun,Etv2,Dnmt3b,Tet1
Monarch MPO	MP:0005015	Increased t cell number	8	467	1.09	7.59e-05	10090.ENSMUSP00000002180,10090.ENSMUSP00000004990,10090.ENSMUSP00000021674,10090.ENSMUSP00000033930,10090.ENSMUSP00000034534,10090.ENSMUSP00000065983,10090.ENSMUSP00000096203,10090.ENSMUSP00000105396	Spi1,Mapk14,Fos,Dusp4,Ets1,Mapk1,Tet2,Dnmt3b
Monarch MPO	MP:0005090	Increased double-negative t cell number	5	93	1.58	7.59e-05	10090.ENSMUSP00000002180,10090.ENSMUSP00000004990,10090.ENSMUSP00000034534,10090.ENSMUSP00000096203,10090.ENSMUSP00000105396	Spi1,Mapk14,Ets1,Tet2,Dnmt3b
Monarch MPO	MP:0005094	Abnormal t cell proliferation	7	311	1.2	7.59e-05	10090.ENSMUSP00000004990,10090.ENSMUSP00000033930,10090.ENSMUSP00000034534,10090.ENSMUSP00000051619,10090.ENSMUSP00000065983,10090.ENSMUSP00000094326,10090.ENSMUSP00000110608	Mapk14,Dusp4,Ets1,Mapk3,Mapk1,Map3k2,Elf4
Monarch MPO	MP:0005460	Abnormal leukopoiesis	9	655	0.99	7.59e-05	10090.ENSMUSP00000002180,10090.ENSMUSP00000004990,10090.ENSMUSP00000021674,10090.ENSMUSP00000034534,10090.ENSMUSP00000065983,10090.ENSMUSP00000096203,10090.ENSMUSP00000103782,10090.ENSMUSP00000105396,10090.ENSMUSP00000110608	Spi1,Mapk14,Fos,Ets1,Mapk1,Tet2,Etv2,Dnmt3b,Elf4
Monarch MPO	MP:0011180	Abnormal hematopoietic cell number	13	1713	0.73	7.59e-05	10090.ENSMUSP00000002180,10090.ENSMUSP00000002487,10090.ENSMUSP00000004990,10090.ENSMUSP00000020991,10090.ENSMUSP00000021674,10090.ENSMUSP00000033930,10090.ENSMUSP00000034534,10090.ENSMUSP00000064680,10090.ENSMUSP00000065983,10090.ENSMUSP00000096203,10090.ENSMUSP00000103782,10090.ENSMUSP00000105396,10090.ENSMUSP00000110608	Spi1,Braf,Mapk14,Dnmt3a,Fos,Dusp4,Ets1,Junb,Mapk1,Tet2,Etv2,Dnmt3b,Elf4
Monarch MPO	MP:0005076	Abnormal cell differentiation	9	682	0.97	8.57e-05	10090.ENSMUSP00000002180,10090.ENSMUSP00000002487,10090.ENSMUSP00000004990,10090.ENSMUSP00000021674,10090.ENSMUSP00000064680,10090.ENSMUSP00000065983,10090.ENSMUSP00000093442,10090.ENSMUSP00000096203,10090.ENSMUSP00000133279	Spi1,Braf,Mapk14,Fos,Junb,Mapk1,Etv1,Tet2,Tet1
Monarch MPO	MP:0010832	Lethality during fetal growth through weaning	14	2110	0.67	8.57e-05	10090.ENSMUSP00000002180,10090.ENSMUSP00000002487,10090.ENSMUSP00000004990,10090.ENSMUSP00000008542,10090.ENSMUSP00000020118,10090.ENSMUSP00000020991,10090.ENSMUSP00000021674,10090.ENSMUSP00000022709,10090.ENSMUSP00000025295,10090.ENSMUSP00000034534,10090.ENSMUSP00000065983,10090.ENSMUSP00000096203,10090.ENSMUSP00000102711,10090.ENSMUSP00000105396	Spi1,Braf,Mapk14,Elk3,Dusp6,Dnmt3a,Fos,Spry2,Spry4,Ets1,Mapk1,Tet2,Jun,Dnmt3b
Monarch MPO	MP:0002127	Abnormal cardiovascular system morphology	14	2148	0.67	0.0001	10090.ENSMUSP00000002487,10090.ENSMUSP00000004990,10090.ENSMUSP00000008542,10090.ENSMUSP00000020118,10090.ENSMUSP00000022709,10090.ENSMUSP00000023612,10090.ENSMUSP00000036076,10090.ENSMUSP00000051619,10090.ENSMUSP00000064680,10090.ENSMUSP00000065983,10090.ENSMUSP00000096203,10090.ENSMUSP00000102711,10090.ENSMUSP00000103782,10090.ENSMUSP00000105396	Braf,Mapk14,Elk3,Dusp6,Spry2,Ets2,Il17rd,Mapk3,Junb,Mapk1,Tet2,Jun,Etv2,Dnmt3b
Monarch MPO	MP:0002396	Abnormal hematopoietic system morphology/development	16	2925	0.59	0.0001	10090.ENSMUSP00000002180,10090.ENSMUSP00000002487,10090.ENSMUSP00000004990,10090.ENSMUSP00000008542,10090.ENSMUSP00000020118,10090.ENSMUSP00000020991,10090.ENSMUSP00000021674,10090.ENSMUSP00000033930,10090.ENSMUSP00000034534,10090.ENSMUSP00000064680,10090.ENSMUSP00000065983,10090.ENSMUSP00000096203,10090.ENSMUSP00000102711,10090.ENSMUSP00000103782,10090.ENSMUSP00000105396,10090.ENSMUSP00000110608	Spi1,Braf,Mapk14,Elk3,Dusp6,Dnmt3a,Fos,Dusp4,Ets1,Junb,Mapk1,Tet2,Jun,Etv2,Dnmt3b,Elf4
Monarch MPO	MP:0005385	Cardiovascular system phenotype	16	2949	0.59	0.00011	10090.ENSMUSP00000002487,10090.ENSMUSP00000004990,10090.ENSMUSP00000008542,10090.ENSMUSP00000020118,10090.ENSMUSP00000022709,10090.ENSMUSP00000023612,10090.ENSMUSP00000033665,10090.ENSMUSP00000036076,10090.ENSMUSP00000051619,10090.ENSMUSP00000064680,10090.ENSMUSP00000065983,10090.ENSMUSP00000094326,10090.ENSMUSP00000096203,10090.ENSMUSP00000102711,10090.ENSMUSP00000103782,10090.ENSMUSP00000105396	Braf,Mapk14,Elk3,Dusp6,Spry2,Ets2,Map3k15,Il17rd,Mapk3,Junb,Mapk1,Map3k2,Tet2,Jun,Etv2,Dnmt3b
Monarch MPO	MP:0011086	Postnatal lethality, incomplete penetrance	9	718	0.95	0.00011	10090.ENSMUSP00000002180,10090.ENSMUSP00000002487,10090.ENSMUSP00000004990,10090.ENSMUSP00000008542,10090.ENSMUSP00000022709,10090.ENSMUSP00000025295,10090.ENSMUSP00000034534,10090.ENSMUSP00000102711,10090.ENSMUSP00000105396	Spi1,Braf,Mapk14,Elk3,Spry2,Spry4,Ets1,Jun,Dnmt3b
Monarch MPO	MP:0004196	Abnormal prenatal growth/weight/body size	12	1527	0.75	0.00012	10090.ENSMUSP00000002180,10090.ENSMUSP00000002487,10090.ENSMUSP00000004990,10090.ENSMUSP00000020991,10090.ENSMUSP00000021674,10090.ENSMUSP00000023612,10090.ENSMUSP00000064680,10090.ENSMUSP00000065983,10090.ENSMUSP00000102711,10090.ENSMUSP00000103782,10090.ENSMUSP00000105396,10090.ENSMUSP00000133279	Spi1,Braf,Mapk14,Dnmt3a,Fos,Ets2,Junb,Mapk1,Jun,Etv2,Dnmt3b,Tet1
Monarch MPO	MP:0013656	Abnormal hematopoietic cell morphology	15	2577	0.62	0.00012	10090.ENSMUSP00000002180,10090.ENSMUSP00000002487,10090.ENSMUSP00000004990,10090.ENSMUSP00000008542,10090.ENSMUSP00000020991,10090.ENSMUSP00000021674,10090.ENSMUSP00000033930,10090.ENSMUSP00000034534,10090.ENSMUSP00000064680,10090.ENSMUSP00000065983,10090.ENSMUSP00000096203,10090.ENSMUSP00000102711,10090.ENSMUSP00000103782,10090.ENSMUSP00000105396,10090.ENSMUSP00000110608	Spi1,Braf,Mapk14,Elk3,Dnmt3a,Fos,Dusp4,Ets1,Junb,Mapk1,Tet2,Jun,Etv2,Dnmt3b,Elf4
Monarch MPO	MP:0002083	Premature death	11	1252	0.8	0.00013	10090.ENSMUSP00000002180,10090.ENSMUSP00000002487,10090.ENSMUSP00000004990,10090.ENSMUSP00000008542,10090.ENSMUSP00000020991,10090.ENSMUSP00000021674,10090.ENSMUSP00000022709,10090.ENSMUSP00000051619,10090.ENSMUSP00000064680,10090.ENSMUSP00000093442,10090.ENSMUSP00000096203	Spi1,Braf,Mapk14,Elk3,Dnmt3a,Fos,Spry2,Mapk3,Junb,Etv1,Tet2
Monarch MPO	MP:0005387	Immune system phenotype	17	3468	0.54	0.00014	10090.ENSMUSP00000002180,10090.ENSMUSP00000002487,10090.ENSMUSP00000004990,10090.ENSMUSP00000009550,10090.ENSMUSP00000020118,10090.ENSMUSP00000021674,10090.ENSMUSP00000033930,10090.ENSMUSP00000034534,10090.ENSMUSP00000051619,10090.ENSMUSP00000064680,10090.ENSMUSP00000065983,10090.ENSMUSP00000094326,10090.ENSMUSP00000096203,10090.ENSMUSP00000102711,10090.ENSMUSP00000103782,10090.ENSMUSP00000105396…	Spi1,Braf,Mapk14,Elk1,Dusp6,Fos,Dusp4,Ets1,Mapk3,Junb,Mapk1,Map3k2,Tet2,Jun,Etv2,Dnmt3b,Elf4
Monarch MPO	MP:0005380	Embryo phenotype	14	2260	0.64	0.00015	10090.ENSMUSP00000002180,10090.ENSMUSP00000002487,10090.ENSMUSP00000004990,10090.ENSMUSP00000020991,10090.ENSMUSP00000021674,10090.ENSMUSP00000023612,10090.ENSMUSP00000051619,10090.ENSMUSP00000056752,10090.ENSMUSP00000064680,10090.ENSMUSP00000065983,10090.ENSMUSP00000102711,10090.ENSMUSP00000103782,10090.ENSMUSP00000105396,10090.ENSMUSP00000133279	Spi1,Braf,Mapk14,Dnmt3a,Fos,Ets2,Mapk3,Fgf4,Junb,Mapk1,Jun,Etv2,Dnmt3b,Tet1
Monarch MPO	MP:0002086	Abnormal extraembryonic tissue morphology	9	779	0.91	0.00018	10090.ENSMUSP00000002487,10090.ENSMUSP00000004990,10090.ENSMUSP00000021674,10090.ENSMUSP00000023612,10090.ENSMUSP00000065983,10090.ENSMUSP00000102711,10090.ENSMUSP00000103782,10090.ENSMUSP00000105396,10090.ENSMUSP00000133279	Braf,Mapk14,Fos,Ets2,Mapk1,Jun,Etv2,Dnmt3b,Tet1
Monarch MPO	MP:0002114	Abnormal axial skeleton morphology	10	1032	0.84	0.00018	10090.ENSMUSP00000002487,10090.ENSMUSP00000020118,10090.ENSMUSP00000021674,10090.ENSMUSP00000022709,10090.ENSMUSP00000025295,10090.ENSMUSP00000033930,10090.ENSMUSP00000065983,10090.ENSMUSP00000102711,10090.ENSMUSP00000105396,10090.ENSMUSP00000133279	Braf,Dusp6,Fos,Spry2,Spry4,Dusp4,Mapk1,Jun,Dnmt3b,Tet1
Monarch MPO	MP:0013657	Abnormal blood cell morphology	13	1957	0.67	0.00018	10090.ENSMUSP00000002180,10090.ENSMUSP00000002487,10090.ENSMUSP00000004990,10090.ENSMUSP00000008542,10090.ENSMUSP00000020991,10090.ENSMUSP00000021674,10090.ENSMUSP00000034534,10090.ENSMUSP00000065983,10090.ENSMUSP00000096203,10090.ENSMUSP00000102711,10090.ENSMUSP00000103782,10090.ENSMUSP00000105396,10090.ENSMUSP00000110608	Spi1,Braf,Mapk14,Elk3,Dnmt3a,Fos,Ets1,Mapk1,Tet2,Jun,Etv2,Dnmt3b,Elf4
Monarch MPO	MP:0000685	Abnormal immune system morphology	14	2327	0.63	0.00019	10090.ENSMUSP00000002180,10090.ENSMUSP00000002487,10090.ENSMUSP00000004990,10090.ENSMUSP00000020118,10090.ENSMUSP00000021674,10090.ENSMUSP00000033930,10090.ENSMUSP00000034534,10090.ENSMUSP00000064680,10090.ENSMUSP00000065983,10090.ENSMUSP00000096203,10090.ENSMUSP00000102711,10090.ENSMUSP00000103782,10090.ENSMUSP00000105396,10090.ENSMUSP00000110608	Spi1,Braf,Mapk14,Dusp6,Fos,Dusp4,Ets1,Junb,Mapk1,Tet2,Jun,Etv2,Dnmt3b,Elf4
Monarch MPO	MP:0002088	Abnormal embryonic growth/weight/body size	11	1346	0.76	0.00022	10090.ENSMUSP00000002180,10090.ENSMUSP00000002487,10090.ENSMUSP00000004990,10090.ENSMUSP00000020991,10090.ENSMUSP00000023612,10090.ENSMUSP00000064680,10090.ENSMUSP00000065983,10090.ENSMUSP00000102711,10090.ENSMUSP00000103782,10090.ENSMUSP00000105396,10090.ENSMUSP00000133279	Spi1,Braf,Mapk14,Dnmt3a,Ets2,Junb,Mapk1,Jun,Etv2,Dnmt3b,Tet1
Monarch MPO	MP:0000716	Abnormal immune system cell morphology	12	1669	0.71	0.00023	10090.ENSMUSP00000002180,10090.ENSMUSP00000002487,10090.ENSMUSP00000004990,10090.ENSMUSP00000021674,10090.ENSMUSP00000033930,10090.ENSMUSP00000034534,10090.ENSMUSP00000064680,10090.ENSMUSP00000065983,10090.ENSMUSP00000096203,10090.ENSMUSP00000103782,10090.ENSMUSP00000105396,10090.ENSMUSP00000110608	Spi1,Braf,Mapk14,Fos,Dusp4,Ets1,Junb,Mapk1,Tet2,Etv2,Dnmt3b,Elf4
Monarch MPO	MP:0010770	Preweaning lethality	19	4663	0.46	0.00026	10090.ENSMUSP00000002180,10090.ENSMUSP00000002487,10090.ENSMUSP00000004990,10090.ENSMUSP00000008542,10090.ENSMUSP00000020118,10090.ENSMUSP00000020991,10090.ENSMUSP00000021674,10090.ENSMUSP00000022709,10090.ENSMUSP00000023612,10090.ENSMUSP00000025295,10090.ENSMUSP00000034534,10090.ENSMUSP00000056752,10090.ENSMUSP00000064680,10090.ENSMUSP00000065983,10090.ENSMUSP00000096203,10090.ENSMUSP00000102711…	Spi1,Braf,Mapk14,Elk3,Dusp6,Dnmt3a,Fos,Spry2,Ets2,Spry4,Ets1,Fgf4,Junb,Mapk1,Tet2,Jun,Etv2,Dnmt3b,Tet1
Monarch MPO	MP:0005274	Abnormal viscerocranium morphology	7	415	1.08	0.00027	10090.ENSMUSP00000002487,10090.ENSMUSP00000021674,10090.ENSMUSP00000022709,10090.ENSMUSP00000025295,10090.ENSMUSP00000065983,10090.ENSMUSP00000105396,10090.ENSMUSP00000133279	Braf,Fos,Spry2,Spry4,Mapk1,Dnmt3b,Tet1
Monarch MPO	MP:0001672	Abnormal embryo development	10	1114	0.81	0.0003	10090.ENSMUSP00000002487,10090.ENSMUSP00000004990,10090.ENSMUSP00000020991,10090.ENSMUSP00000056752,10090.ENSMUSP00000064680,10090.ENSMUSP00000065983,10090.ENSMUSP00000102711,10090.ENSMUSP00000103782,10090.ENSMUSP00000105396,10090.ENSMUSP00000133279	Braf,Mapk14,Dnmt3a,Fgf4,Junb,Mapk1,Jun,Etv2,Dnmt3b,Tet1
Monarch MPO	MP:0014134	Abnormal embryo morphology	12	1724	0.69	0.0003	10090.ENSMUSP00000002180,10090.ENSMUSP00000002487,10090.ENSMUSP00000004990,10090.ENSMUSP00000020991,10090.ENSMUSP00000023612,10090.ENSMUSP00000056752,10090.ENSMUSP00000064680,10090.ENSMUSP00000065983,10090.ENSMUSP00000102711,10090.ENSMUSP00000103782,10090.ENSMUSP00000105396,10090.ENSMUSP00000133279	Spi1,Braf,Mapk14,Dnmt3a,Ets2,Fgf4,Junb,Mapk1,Jun,Etv2,Dnmt3b,Tet1
Monarch MPO	MP:0004808	Abnormal hematopoietic stem cell morphology	5	149	1.38	0.00034	10090.ENSMUSP00000002180,10090.ENSMUSP00000020991,10090.ENSMUSP00000096203,10090.ENSMUSP00000103782,10090.ENSMUSP00000110608	Spi1,Dnmt3a,Tet2,Etv2,Elf4
Monarch MPO	MP:0000221	Decreased leukocyte cell number	9	897	0.85	0.0004	10090.ENSMUSP00000002180,10090.ENSMUSP00000002487,10090.ENSMUSP00000021674,10090.ENSMUSP00000034534,10090.ENSMUSP00000064680,10090.ENSMUSP00000065983,10090.ENSMUSP00000096203,10090.ENSMUSP00000105396,10090.ENSMUSP00000110608	Spi1,Braf,Fos,Ets1,Junb,Mapk1,Tet2,Dnmt3b,Elf4
Monarch MPO	MP:0000438	Abnormal cranium morphology	8	657	0.94	0.0004	10090.ENSMUSP00000002487,10090.ENSMUSP00000020118,10090.ENSMUSP00000021674,10090.ENSMUSP00000022709,10090.ENSMUSP00000025295,10090.ENSMUSP00000065983,10090.ENSMUSP00000105396,10090.ENSMUSP00000133279	Braf,Dusp6,Fos,Spry2,Spry4,Mapk1,Dnmt3b,Tet1
Monarch MPO	MP:0004809	Increased hematopoietic stem cell number	4	66	1.63	0.0004	10090.ENSMUSP00000002180,10090.ENSMUSP00000020991,10090.ENSMUSP00000096203,10090.ENSMUSP00000110608	Spi1,Dnmt3a,Tet2,Elf4
Monarch MPO	MP:0001265	Decreased body size	11	1474	0.72	0.00041	10090.ENSMUSP00000002180,10090.ENSMUSP00000002487,10090.ENSMUSP00000004990,10090.ENSMUSP00000020991,10090.ENSMUSP00000021674,10090.ENSMUSP00000022709,10090.ENSMUSP00000065983,10090.ENSMUSP00000093442,10090.ENSMUSP00000102711,10090.ENSMUSP00000105396,10090.ENSMUSP00000133279	Spi1,Braf,Mapk14,Dnmt3a,Fos,Spry2,Mapk1,Etv1,Jun,Dnmt3b,Tet1
Monarch MPO	MP:0011182	Decreased hematopoietic cell number	10	1172	0.78	0.00041	10090.ENSMUSP00000002180,10090.ENSMUSP00000002487,10090.ENSMUSP00000021674,10090.ENSMUSP00000034534,10090.ENSMUSP00000064680,10090.ENSMUSP00000065983,10090.ENSMUSP00000096203,10090.ENSMUSP00000103782,10090.ENSMUSP00000105396,10090.ENSMUSP00000110608	Spi1,Braf,Fos,Ets1,Junb,Mapk1,Tet2,Etv2,Dnmt3b,Elf4
Monarch MPO	MP:0001614	Abnormal blood vessel morphology	10	1195	0.77	0.00045	10090.ENSMUSP00000002487,10090.ENSMUSP00000004990,10090.ENSMUSP00000008542,10090.ENSMUSP00000023612,10090.ENSMUSP00000064680,10090.ENSMUSP00000065983,10090.ENSMUSP00000096203,10090.ENSMUSP00000102711,10090.ENSMUSP00000103782,10090.ENSMUSP00000105396	Braf,Mapk14,Elk3,Ets2,Junb,Mapk1,Tet2,Jun,Etv2,Dnmt3b
Monarch MPO	MP:0010771	Integument phenotype	11	1503	0.72	0.00045	10090.ENSMUSP00000002487,10090.ENSMUSP00000009550,10090.ENSMUSP00000017868,10090.ENSMUSP00000021674,10090.ENSMUSP00000023612,10090.ENSMUSP00000031280,10090.ENSMUSP00000034534,10090.ENSMUSP00000064680,10090.ENSMUSP00000102711,10090.ENSMUSP00000105396,10090.ENSMUSP00000133279	Braf,Elk1,Etv4,Fos,Ets2,Fgf5,Ets1,Junb,Jun,Dnmt3b,Tet1
Monarch MPO	MP:0013707	Abnormal hematopoietic precursor cell morphology	6	296	1.16	0.00045	10090.ENSMUSP00000002180,10090.ENSMUSP00000020991,10090.ENSMUSP00000034534,10090.ENSMUSP00000096203,10090.ENSMUSP00000103782,10090.ENSMUSP00000110608	Spi1,Dnmt3a,Ets1,Tet2,Etv2,Elf4
Monarch MPO	MP:0000715	Decreased thymocyte number	5	168	1.33	0.0005	10090.ENSMUSP00000002180,10090.ENSMUSP00000002487,10090.ENSMUSP00000021674,10090.ENSMUSP00000034534,10090.ENSMUSP00000105396	Spi1,Braf,Fos,Ets1,Dnmt3b
Monarch MPO	MP:0006042	Increased apoptosis	9	938	0.83	0.0005	10090.ENSMUSP00000002487,10090.ENSMUSP00000004990,10090.ENSMUSP00000020118,10090.ENSMUSP00000021674,10090.ENSMUSP00000034534,10090.ENSMUSP00000065983,10090.ENSMUSP00000102711,10090.ENSMUSP00000103782,10090.ENSMUSP00000105396	Braf,Mapk14,Dusp6,Fos,Ets1,Mapk1,Jun,Etv2,Dnmt3b
Monarch MPO	MP:0001625	Cardiac hypertrophy	5	175	1.31	0.00058	10090.ENSMUSP00000002487,10090.ENSMUSP00000004990,10090.ENSMUSP00000020118,10090.ENSMUSP00000051619,10090.ENSMUSP00000065983	Braf,Mapk14,Dusp6,Mapk3,Mapk1
Monarch MPO	MP:0002221	Abnormal lymph organ size	9	962	0.82	0.00058	10090.ENSMUSP00000002180,10090.ENSMUSP00000002487,10090.ENSMUSP00000020118,10090.ENSMUSP00000021674,10090.ENSMUSP00000034534,10090.ENSMUSP00000096203,10090.ENSMUSP00000102711,10090.ENSMUSP00000105396,10090.ENSMUSP00000110608	Spi1,Braf,Dusp6,Fos,Ets1,Tet2,Jun,Dnmt3b,Elf4
Monarch MPO	MP:0003984	Embryonic growth retardation	7	495	1	0.00058	10090.ENSMUSP00000002487,10090.ENSMUSP00000004990,10090.ENSMUSP00000065983,10090.ENSMUSP00000102711,10090.ENSMUSP00000103782,10090.ENSMUSP00000105396,10090.ENSMUSP00000133279	Braf,Mapk14,Mapk1,Jun,Etv2,Dnmt3b,Tet1
Monarch MPO	MP:0005016	Decreased lymphocyte cell number	8	707	0.91	0.00058	10090.ENSMUSP00000002180,10090.ENSMUSP00000002487,10090.ENSMUSP00000021674,10090.ENSMUSP00000034534,10090.ENSMUSP00000065983,10090.ENSMUSP00000096203,10090.ENSMUSP00000105396,10090.ENSMUSP00000110608	Spi1,Braf,Fos,Ets1,Mapk1,Tet2,Dnmt3b,Elf4
Monarch MPO	MP:0002442	Abnormal leukocyte physiology	10	1254	0.75	0.00061	10090.ENSMUSP00000002487,10090.ENSMUSP00000004990,10090.ENSMUSP00000021674,10090.ENSMUSP00000033930,10090.ENSMUSP00000034534,10090.ENSMUSP00000051619,10090.ENSMUSP00000065983,10090.ENSMUSP00000094326,10090.ENSMUSP00000105396,10090.ENSMUSP00000110608	Braf,Mapk14,Fos,Dusp4,Ets1,Mapk3,Mapk1,Map3k2,Dnmt3b,Elf4
Monarch MPO	MP:0000703	Abnormal thymus morphology	7	504	0.99	0.00062	10090.ENSMUSP00000002180,10090.ENSMUSP00000002487,10090.ENSMUSP00000021674,10090.ENSMUSP00000034534,10090.ENSMUSP00000065983,10090.ENSMUSP00000096203,10090.ENSMUSP00000105396	Spi1,Braf,Fos,Ets1,Mapk1,Tet2,Dnmt3b
Monarch MPO	MP:0005379	Endocrine/exocrine gland phenotype	13	2314	0.6	0.0007	10090.ENSMUSP00000002180,10090.ENSMUSP00000002487,10090.ENSMUSP00000004990,10090.ENSMUSP00000017868,10090.ENSMUSP00000020991,10090.ENSMUSP00000021674,10090.ENSMUSP00000023612,10090.ENSMUSP00000034534,10090.ENSMUSP00000065983,10090.ENSMUSP00000096203,10090.ENSMUSP00000102711,10090.ENSMUSP00000105396,10090.ENSMUSP00000133279	Spi1,Braf,Mapk14,Etv4,Dnmt3a,Fos,Ets2,Ets1,Mapk1,Tet2,Jun,Dnmt3b,Tet1
Monarch MPO	MP:0005018	Decreased t cell number	7	520	0.98	0.00074	10090.ENSMUSP00000002180,10090.ENSMUSP00000002487,10090.ENSMUSP00000021674,10090.ENSMUSP00000034534,10090.ENSMUSP00000065983,10090.ENSMUSP00000105396,10090.ENSMUSP00000110608	Spi1,Braf,Fos,Ets1,Mapk1,Dnmt3b,Elf4
Monarch MPO	MP:0002408	Abnormal double-positive t cell morphology	5	193	1.27	0.00083	10090.ENSMUSP00000002180,10090.ENSMUSP00000021674,10090.ENSMUSP00000034534,10090.ENSMUSP00000065983,10090.ENSMUSP00000105396	Spi1,Fos,Ets1,Mapk1,Dnmt3b
Monarch MPO	MP:0002020	Increased tumor incidence	7	535	0.97	0.00084	10090.ENSMUSP00000002180,10090.ENSMUSP00000002487,10090.ENSMUSP00000004990,10090.ENSMUSP00000021674,10090.ENSMUSP00000022709,10090.ENSMUSP00000023612,10090.ENSMUSP00000133279	Spi1,Braf,Mapk14,Fos,Spry2,Ets2,Tet1
Monarch MPO	MP:0001648	Abnormal apoptosis	10	1335	0.73	0.00093	10090.ENSMUSP00000002487,10090.ENSMUSP00000004990,10090.ENSMUSP00000020118,10090.ENSMUSP00000021674,10090.ENSMUSP00000033930,10090.ENSMUSP00000034534,10090.ENSMUSP00000065983,10090.ENSMUSP00000102711,10090.ENSMUSP00000103782,10090.ENSMUSP00000105396	Braf,Mapk14,Dusp6,Fos,Dusp4,Ets1,Mapk1,Jun,Etv2,Dnmt3b
Monarch MPO	MP:0002925	Abnormal cardiovascular development	8	777	0.86	0.00093	10090.ENSMUSP00000002487,10090.ENSMUSP00000004990,10090.ENSMUSP00000008542,10090.ENSMUSP00000020118,10090.ENSMUSP00000022709,10090.ENSMUSP00000023612,10090.ENSMUSP00000102711,10090.ENSMUSP00000103782	Braf,Mapk14,Elk3,Dusp6,Spry2,Ets2,Jun,Etv2
Monarch MPO	MP:0002722	Abnormal immune system organ morphology	10	1353	0.72	0.001	10090.ENSMUSP00000002180,10090.ENSMUSP00000002487,10090.ENSMUSP00000020118,10090.ENSMUSP00000021674,10090.ENSMUSP00000034534,10090.ENSMUSP00000065983,10090.ENSMUSP00000096203,10090.ENSMUSP00000102711,10090.ENSMUSP00000105396,10090.ENSMUSP00000110608	Spi1,Braf,Dusp6,Fos,Ets1,Mapk1,Tet2,Jun,Dnmt3b,Elf4
Monarch MPO	MP:0002163	Abnormal gland morphology	12	2080	0.61	0.0012	10090.ENSMUSP00000002180,10090.ENSMUSP00000002487,10090.ENSMUSP00000017868,10090.ENSMUSP00000020991,10090.ENSMUSP00000021674,10090.ENSMUSP00000023612,10090.ENSMUSP00000034534,10090.ENSMUSP00000065983,10090.ENSMUSP00000096203,10090.ENSMUSP00000102711,10090.ENSMUSP00000105396,10090.ENSMUSP00000133279	Spi1,Braf,Etv4,Dnmt3a,Fos,Ets2,Ets1,Mapk1,Tet2,Jun,Dnmt3b,Tet1
Monarch MPO	MP:0008803	Abnormal placental labyrinth vasculature morphology	4	100	1.45	0.0013	10090.ENSMUSP00000002487,10090.ENSMUSP00000004990,10090.ENSMUSP00000065983,10090.ENSMUSP00000103782	Braf,Mapk14,Mapk1,Etv2
Monarch MPO	MP:0000428	Abnormal craniofacial morphology	9	1113	0.76	0.0015	10090.ENSMUSP00000002487,10090.ENSMUSP00000020118,10090.ENSMUSP00000021674,10090.ENSMUSP00000022709,10090.ENSMUSP00000025295,10090.ENSMUSP00000065983,10090.ENSMUSP00000102711,10090.ENSMUSP00000105396,10090.ENSMUSP00000133279	Braf,Dusp6,Fos,Spry2,Spry4,Mapk1,Jun,Dnmt3b,Tet1
Monarch MPO	MP:0001790	Abnormal immune system physiology	12	2137	0.6	0.0016	10090.ENSMUSP00000002487,10090.ENSMUSP00000004990,10090.ENSMUSP00000021674,10090.ENSMUSP00000033930,10090.ENSMUSP00000034534,10090.ENSMUSP00000051619,10090.ENSMUSP00000064680,10090.ENSMUSP00000065983,10090.ENSMUSP00000094326,10090.ENSMUSP00000102711,10090.ENSMUSP00000105396,10090.ENSMUSP00000110608	Braf,Mapk14,Fos,Dusp4,Ets1,Mapk3,Junb,Mapk1,Map3k2,Jun,Dnmt3b,Elf4
Monarch MPO	MP:0006207	Embryonic lethality during organogenesis	8	849	0.83	0.0016	10090.ENSMUSP00000002487,10090.ENSMUSP00000004990,10090.ENSMUSP00000023612,10090.ENSMUSP00000065983,10090.ENSMUSP00000102711,10090.ENSMUSP00000103782,10090.ENSMUSP00000105396,10090.ENSMUSP00000133279	Braf,Mapk14,Ets2,Mapk1,Jun,Etv2,Dnmt3b,Tet1
Monarch MPO	MP:0001718	Abnormal visceral yolk sac morphology	5	232	1.19	0.0017	10090.ENSMUSP00000004990,10090.ENSMUSP00000023612,10090.ENSMUSP00000102711,10090.ENSMUSP00000103782,10090.ENSMUSP00000133279	Mapk14,Ets2,Jun,Etv2,Tet1
Monarch MPO	MP:0030996	Decreased pacinian corpuscle number	2	3	2.68	0.0017	10090.ENSMUSP00000017868,10090.ENSMUSP00000093442	Etv4,Etv1
Monarch MPO	MP:0030998	Small pacinian corpuscles	2	3	2.68	0.0017	10090.ENSMUSP00000017868,10090.ENSMUSP00000093442	Etv4,Etv1
Monarch MPO	MP:0003632	Abnormal nervous system morphology	13	2637	0.54	0.0022	10090.ENSMUSP00000002180,10090.ENSMUSP00000002487,10090.ENSMUSP00000017868,10090.ENSMUSP00000020991,10090.ENSMUSP00000021674,10090.ENSMUSP00000022709,10090.ENSMUSP00000036076,10090.ENSMUSP00000064680,10090.ENSMUSP00000065983,10090.ENSMUSP00000093442,10090.ENSMUSP00000102711,10090.ENSMUSP00000105396,10090.ENSMUSP00000133279	Spi1,Braf,Etv4,Dnmt3a,Fos,Spry2,Il17rd,Junb,Mapk1,Etv1,Jun,Dnmt3b,Tet1
Monarch MPO	MP:0006410	Abnormal common myeloid progenitor cell morphology	4	120	1.37	0.0022	10090.ENSMUSP00000002180,10090.ENSMUSP00000020991,10090.ENSMUSP00000096203,10090.ENSMUSP00000103782	Spi1,Dnmt3a,Tet2,Etv2
Monarch MPO	MP:0012762	Abnormal alpha-beta t cell morphology	7	648	0.89	0.0023	10090.ENSMUSP00000002180,10090.ENSMUSP00000021674,10090.ENSMUSP00000033930,10090.ENSMUSP00000034534,10090.ENSMUSP00000065983,10090.ENSMUSP00000105396,10090.ENSMUSP00000110608	Spi1,Fos,Dusp4,Ets1,Mapk1,Dnmt3b,Elf4
Monarch MPO	MP:0006208	Lethality throughout fetal growth and development	6	446	0.98	0.0027	10090.ENSMUSP00000002180,10090.ENSMUSP00000002487,10090.ENSMUSP00000004990,10090.ENSMUSP00000065983,10090.ENSMUSP00000102711,10090.ENSMUSP00000105396	Spi1,Braf,Mapk14,Mapk1,Jun,Dnmt3b
Monarch MPO	MP:0011098	Embryonic lethality during organogenesis, complete penetrance	7	673	0.87	0.0028	10090.ENSMUSP00000002487,10090.ENSMUSP00000004990,10090.ENSMUSP00000023612,10090.ENSMUSP00000065983,10090.ENSMUSP00000102711,10090.ENSMUSP00000103782,10090.ENSMUSP00000133279	Braf,Mapk14,Ets2,Mapk1,Jun,Etv2,Tet1
Monarch MPO	MP:0010678	Abnormal skin adnexa morphology	8	941	0.78	0.0029	10090.ENSMUSP00000002487,10090.ENSMUSP00000009550,10090.ENSMUSP00000017868,10090.ENSMUSP00000021674,10090.ENSMUSP00000023612,10090.ENSMUSP00000031280,10090.ENSMUSP00000034534,10090.ENSMUSP00000133279	Braf,Elk1,Etv4,Fos,Ets2,Fgf5,Ets1,Tet1
Monarch MPO	MP:0011099	Lethality throughout fetal growth and development, complete penetrance	5	275	1.11	0.0032	10090.ENSMUSP00000002180,10090.ENSMUSP00000004990,10090.ENSMUSP00000065983,10090.ENSMUSP00000102711,10090.ENSMUSP00000105396	Spi1,Mapk14,Mapk1,Jun,Dnmt3b
Monarch MPO	MP:0005378	Growth/size/body region phenotype	17	4670	0.41	0.0033	10090.ENSMUSP00000002180,10090.ENSMUSP00000002487,10090.ENSMUSP00000004990,10090.ENSMUSP00000020118,10090.ENSMUSP00000020991,10090.ENSMUSP00000021674,10090.ENSMUSP00000022709,10090.ENSMUSP00000023612,10090.ENSMUSP00000051619,10090.ENSMUSP00000064680,10090.ENSMUSP00000065983,10090.ENSMUSP00000093442,10090.ENSMUSP00000096203,10090.ENSMUSP00000102711,10090.ENSMUSP00000103782,10090.ENSMUSP00000105396…	Spi1,Braf,Mapk14,Dusp6,Dnmt3a,Fos,Spry2,Ets2,Mapk3,Junb,Mapk1,Etv1,Tet2,Jun,Etv2,Dnmt3b,Tet1
Monarch MPO	MP:0011108	Embryonic lethality during organogenesis, incomplete penetrance	5	277	1.11	0.0033	10090.ENSMUSP00000002487,10090.ENSMUSP00000004990,10090.ENSMUSP00000102711,10090.ENSMUSP00000103782,10090.ENSMUSP00000105396	Braf,Mapk14,Jun,Etv2,Dnmt3b
Monarch MPO	MP:0003631	Nervous system phenotype	15	3681	0.46	0.0034	10090.ENSMUSP00000002180,10090.ENSMUSP00000002487,10090.ENSMUSP00000009550,10090.ENSMUSP00000017868,10090.ENSMUSP00000020991,10090.ENSMUSP00000021674,10090.ENSMUSP00000022709,10090.ENSMUSP00000036076,10090.ENSMUSP00000051619,10090.ENSMUSP00000064680,10090.ENSMUSP00000065983,10090.ENSMUSP00000093442,10090.ENSMUSP00000102711,10090.ENSMUSP00000105396,10090.ENSMUSP00000133279	Spi1,Braf,Elk1,Etv4,Dnmt3a,Fos,Spry2,Il17rd,Mapk3,Junb,Mapk1,Etv1,Jun,Dnmt3b,Tet1
Monarch MPO	MP:0008877	Abnormal dna methylation	3	46	1.67	0.0034	10090.ENSMUSP00000087049,10090.ENSMUSP00000105396,10090.ENSMUSP00000133279	Tet3,Dnmt3b,Tet1
Monarch MPO	MP:0000367	Abnormal coat/ hair morphology	6	474	0.95	0.0036	10090.ENSMUSP00000002487,10090.ENSMUSP00000009550,10090.ENSMUSP00000023612,10090.ENSMUSP00000031280,10090.ENSMUSP00000034534,10090.ENSMUSP00000133279	Braf,Elk1,Ets2,Fgf5,Ets1,Tet1
Monarch MPO	MP:0010866	Abnormal prenatal body size	9	1278	0.7	0.0036	10090.ENSMUSP00000002180,10090.ENSMUSP00000002487,10090.ENSMUSP00000020991,10090.ENSMUSP00000021674,10090.ENSMUSP00000023612,10090.ENSMUSP00000064680,10090.ENSMUSP00000065983,10090.ENSMUSP00000103782,10090.ENSMUSP00000105396	Spi1,Braf,Dnmt3a,Fos,Ets2,Junb,Mapk1,Etv2,Dnmt3b
Monarch MPO	MP:0008946	Abnormal neuron number	6	503	0.93	0.0048	10090.ENSMUSP00000002487,10090.ENSMUSP00000017868,10090.ENSMUSP00000020991,10090.ENSMUSP00000021674,10090.ENSMUSP00000022709,10090.ENSMUSP00000093442	Braf,Etv4,Dnmt3a,Fos,Spry2,Etv1
Monarch MPO	MP:0009258	Abnormal thymocyte apoptosis	3	54	1.6	0.005	10090.ENSMUSP00000002487,10090.ENSMUSP00000034534,10090.ENSMUSP00000105396	Braf,Ets1,Dnmt3b
Monarch MPO	MP:0002080	Prenatal lethality	12	2485	0.54	0.0054	10090.ENSMUSP00000002180,10090.ENSMUSP00000002487,10090.ENSMUSP00000004990,10090.ENSMUSP00000023612,10090.ENSMUSP00000034534,10090.ENSMUSP00000056752,10090.ENSMUSP00000064680,10090.ENSMUSP00000065983,10090.ENSMUSP00000102711,10090.ENSMUSP00000103782,10090.ENSMUSP00000105396,10090.ENSMUSP00000133279	Spi1,Braf,Mapk14,Ets2,Ets1,Fgf4,Junb,Mapk1,Jun,Etv2,Dnmt3b,Tet1
Monarch MPO	MP:0002169	No abnormal phenotype detected	11	2092	0.57	0.0056	10090.ENSMUSP00000002180,10090.ENSMUSP00000002487,10090.ENSMUSP00000004990,10090.ENSMUSP00000021674,10090.ENSMUSP00000023612,10090.ENSMUSP00000036076,10090.ENSMUSP00000056752,10090.ENSMUSP00000093442,10090.ENSMUSP00000096203,10090.ENSMUSP00000102711,10090.ENSMUSP00000103782	Spi1,Braf,Mapk14,Fos,Ets2,Il17rd,Fgf4,Etv1,Tet2,Jun,Etv2
Monarch MPO	MP:0002364	Abnormal thymus size	5	317	1.05	0.0056	10090.ENSMUSP00000002180,10090.ENSMUSP00000002487,10090.ENSMUSP00000021674,10090.ENSMUSP00000034534,10090.ENSMUSP00000105396	Spi1,Braf,Fos,Ets1,Dnmt3b
Monarch MPO	MP:0005092	Decreased double-positive t cell number	4	160	1.25	0.0056	10090.ENSMUSP00000002180,10090.ENSMUSP00000021674,10090.ENSMUSP00000065983,10090.ENSMUSP00000105396	Spi1,Fos,Mapk1,Dnmt3b
Monarch MPO	MP:0012763	Abnormal alpha-beta t cell number	6	521	0.91	0.0056	10090.ENSMUSP00000002180,10090.ENSMUSP00000021674,10090.ENSMUSP00000033930,10090.ENSMUSP00000034534,10090.ENSMUSP00000065983,10090.ENSMUSP00000110608	Spi1,Fos,Dusp4,Ets1,Mapk1,Elf4
Monarch MPO	MP:0000215	Absent erythrocytes	2	8	2.25	0.0058	10090.ENSMUSP00000002180,10090.ENSMUSP00000103782	Spi1,Etv2
Monarch MPO	MP:0000259	Abnormal vascular development	6	528	0.91	0.0058	10090.ENSMUSP00000002487,10090.ENSMUSP00000004990,10090.ENSMUSP00000008542,10090.ENSMUSP00000023612,10090.ENSMUSP00000102711,10090.ENSMUSP00000103782	Braf,Mapk14,Elk3,Ets2,Jun,Etv2
Monarch MPO	MP:0002063	Abnormal learning/memory/conditioning	8	1061	0.73	0.0058	10090.ENSMUSP00000002487,10090.ENSMUSP00000004990,10090.ENSMUSP00000009550,10090.ENSMUSP00000020991,10090.ENSMUSP00000021674,10090.ENSMUSP00000051619,10090.ENSMUSP00000065983,10090.ENSMUSP00000133279	Braf,Mapk14,Elk1,Dnmt3a,Fos,Mapk3,Mapk1,Tet1
Monarch MPO	MP:0008208	Decreased pro-b cell number	3	58	1.57	0.0058	10090.ENSMUSP00000002180,10090.ENSMUSP00000034534,10090.ENSMUSP00000096203	Spi1,Ets1,Tet2
Monarch MPO	MP:0000352	Decreased cell proliferation	7	786	0.8	0.006	10090.ENSMUSP00000004990,10090.ENSMUSP00000021674,10090.ENSMUSP00000034534,10090.ENSMUSP00000051619,10090.ENSMUSP00000056752,10090.ENSMUSP00000065983,10090.ENSMUSP00000102711	Mapk14,Fos,Ets1,Mapk3,Fgf4,Mapk1,Jun
Monarch MPO	MP:0011702	Abnormal fibroblast proliferation	4	167	1.23	0.006	10090.ENSMUSP00000002487,10090.ENSMUSP00000051619,10090.ENSMUSP00000065983,10090.ENSMUSP00000102711	Braf,Mapk3,Mapk1,Jun
Monarch MPO	MP:0031215	Abnormal response to myocardial ischemic injury	3	61	1.54	0.0063	10090.ENSMUSP00000004990,10090.ENSMUSP00000020118,10090.ENSMUSP00000065983	Mapk14,Dusp6,Mapk1
Monarch MPO	MP:0004951	Abnormal spleen weight	5	339	1.02	0.0069	10090.ENSMUSP00000002180,10090.ENSMUSP00000002487,10090.ENSMUSP00000020118,10090.ENSMUSP00000034534,10090.ENSMUSP00000096203	Spi1,Braf,Dusp6,Ets1,Tet2
Monarch MPO	MP:0005371	Limbs/digits/tail phenotype	7	806	0.79	0.0069	10090.ENSMUSP00000017868,10090.ENSMUSP00000021674,10090.ENSMUSP00000025295,10090.ENSMUSP00000033930,10090.ENSMUSP00000056752,10090.ENSMUSP00000102711,10090.ENSMUSP00000105396	Etv4,Fos,Spry4,Dusp4,Fgf4,Jun,Dnmt3b
Monarch MPO	MP:0003222	Increased cardiomyocyte apoptosis	3	64	1.52	0.0071	10090.ENSMUSP00000004990,10090.ENSMUSP00000020118,10090.ENSMUSP00000065983	Mapk14,Dusp6,Mapk1
Monarch MPO	MP:0004952	Increased spleen weight	4	177	1.21	0.0071	10090.ENSMUSP00000002180,10090.ENSMUSP00000002487,10090.ENSMUSP00000020118,10090.ENSMUSP00000096203	Spi1,Braf,Dusp6,Tet2
Monarch MPO	MP:0011091	Prenatal lethality, complete penetrance	5	343	1.02	0.0071	10090.ENSMUSP00000002180,10090.ENSMUSP00000004990,10090.ENSMUSP00000023612,10090.ENSMUSP00000065983,10090.ENSMUSP00000105396	Spi1,Mapk14,Ets2,Mapk1,Dnmt3b
Monarch MPO	MP:0000454	Abnormal jaw morphology	5	350	1.01	0.0077	10090.ENSMUSP00000002487,10090.ENSMUSP00000021674,10090.ENSMUSP00000022709,10090.ENSMUSP00000025295,10090.ENSMUSP00000065983	Braf,Fos,Spry2,Spry4,Mapk1
Monarch MPO	MP:0002058	Neonatal lethality	7	829	0.78	0.0078	10090.ENSMUSP00000002180,10090.ENSMUSP00000002487,10090.ENSMUSP00000021674,10090.ENSMUSP00000065983,10090.ENSMUSP00000096203,10090.ENSMUSP00000102711,10090.ENSMUSP00000105396	Spi1,Braf,Fos,Mapk1,Tet2,Jun,Dnmt3b
Monarch MPO	MP:0002447	Abnormal erythrocyte morphology	8	1124	0.7	0.0078	10090.ENSMUSP00000002180,10090.ENSMUSP00000002487,10090.ENSMUSP00000004990,10090.ENSMUSP00000008542,10090.ENSMUSP00000021674,10090.ENSMUSP00000096203,10090.ENSMUSP00000102711,10090.ENSMUSP00000103782	Spi1,Braf,Mapk14,Elk3,Fos,Tet2,Jun,Etv2
Monarch MPO	MP:0010763	Abnormal hematopoietic stem cell physiology	3	68	1.5	0.0081	10090.ENSMUSP00000002180,10090.ENSMUSP00000096203,10090.ENSMUSP00000103782	Spi1,Tet2,Etv2
Monarch MPO	MP:0001697	Abnormal embryo size	8	1136	0.7	0.0082	10090.ENSMUSP00000002180,10090.ENSMUSP00000002487,10090.ENSMUSP00000020991,10090.ENSMUSP00000023612,10090.ENSMUSP00000064680,10090.ENSMUSP00000065983,10090.ENSMUSP00000103782,10090.ENSMUSP00000105396	Spi1,Braf,Dnmt3a,Ets2,Junb,Mapk1,Etv2,Dnmt3b
Monarch MPO	MP:0002081	Perinatal lethality	8	1143	0.7	0.0084	10090.ENSMUSP00000002180,10090.ENSMUSP00000002487,10090.ENSMUSP00000021674,10090.ENSMUSP00000034534,10090.ENSMUSP00000065983,10090.ENSMUSP00000096203,10090.ENSMUSP00000102711,10090.ENSMUSP00000105396	Spi1,Braf,Fos,Ets1,Mapk1,Tet2,Jun,Dnmt3b
Monarch MPO	MP:0005095	Decreased t cell proliferation	4	187	1.18	0.0084	10090.ENSMUSP00000004990,10090.ENSMUSP00000034534,10090.ENSMUSP00000051619,10090.ENSMUSP00000065983	Mapk14,Ets1,Mapk3,Mapk1
Monarch MPO	MP:0009322	Increased splenocyte apoptosis	2	11	2.11	0.0086	10090.ENSMUSP00000002487,10090.ENSMUSP00000034534	Braf,Ets1
Monarch MPO	MP:0000172	Abnormal bone marrow cell number	4	190	1.18	0.0088	10090.ENSMUSP00000002180,10090.ENSMUSP00000002487,10090.ENSMUSP00000096203,10090.ENSMUSP00000103782	Spi1,Braf,Tet2,Etv2
Monarch MPO	MP:0000266	Abnormal heart morphology	9	1489	0.63	0.0088	10090.ENSMUSP00000002487,10090.ENSMUSP00000004990,10090.ENSMUSP00000020118,10090.ENSMUSP00000022709,10090.ENSMUSP00000036076,10090.ENSMUSP00000051619,10090.ENSMUSP00000065983,10090.ENSMUSP00000102711,10090.ENSMUSP00000103782	Braf,Mapk14,Dusp6,Spry2,Il17rd,Mapk3,Mapk1,Jun,Etv2
Monarch MPO	MP:0000458	Abnormal mandible morphology	4	190	1.18	0.0088	10090.ENSMUSP00000002487,10090.ENSMUSP00000022709,10090.ENSMUSP00000025295,10090.ENSMUSP00000065983	Braf,Spry2,Spry4,Mapk1
Monarch MPO	MP:0005164	Abnormal response to injury	6	591	0.86	0.0088	10090.ENSMUSP00000002487,10090.ENSMUSP00000004990,10090.ENSMUSP00000020118,10090.ENSMUSP00000065983,10090.ENSMUSP00000094326,10090.ENSMUSP00000102711	Braf,Mapk14,Dusp6,Mapk1,Map3k2,Jun
Monarch MPO	MP:0008014	Increased lung tumor incidence	3	71	1.48	0.0088	10090.ENSMUSP00000002487,10090.ENSMUSP00000004990,10090.ENSMUSP00000022709	Braf,Mapk14,Spry2
Monarch MPO	MP:0003009	Abnormal cytokine secretion	6	596	0.85	0.0091	10090.ENSMUSP00000002487,10090.ENSMUSP00000004990,10090.ENSMUSP00000021674,10090.ENSMUSP00000033930,10090.ENSMUSP00000051619,10090.ENSMUSP00000064680	Braf,Mapk14,Fos,Dusp4,Mapk3,Junb
Monarch MPO	MP:0010273	Increased classified tumor incidence	5	371	0.98	0.0091	10090.ENSMUSP00000002180,10090.ENSMUSP00000002487,10090.ENSMUSP00000004990,10090.ENSMUSP00000021674,10090.ENSMUSP00000133279	Spi1,Braf,Mapk14,Fos,Tet1
Monarch MPO	MP:0000275	Heart hyperplasia	2	12	2.07	0.0093	10090.ENSMUSP00000002487,10090.ENSMUSP00000020118	Braf,Dusp6
Monarch MPO	MP:0006055	Abnormal vascular endothelial cell morphology	3	75	1.45	0.0095	10090.ENSMUSP00000002487,10090.ENSMUSP00000008542,10090.ENSMUSP00000103782	Braf,Elk3,Etv2
Monarch MPO	MP:0001544	Abnormal cardiovascular system physiology	9	1527	0.62	0.0098	10090.ENSMUSP00000002487,10090.ENSMUSP00000004990,10090.ENSMUSP00000008542,10090.ENSMUSP00000020118,10090.ENSMUSP00000033665,10090.ENSMUSP00000036076,10090.ENSMUSP00000065983,10090.ENSMUSP00000094326,10090.ENSMUSP00000103782	Braf,Mapk14,Elk3,Dusp6,Map3k15,Il17rd,Mapk1,Map3k2,Etv2
Monarch MPO	MP:0005031	Abnormal trophoblast layer morphology	4	200	1.15	0.0098	10090.ENSMUSP00000002487,10090.ENSMUSP00000004990,10090.ENSMUSP00000023612,10090.ENSMUSP00000065983	Braf,Mapk14,Ets2,Mapk1
Monarch MPO	MP:0031094	Organomegaly	7	879	0.75	0.0098	10090.ENSMUSP00000002180,10090.ENSMUSP00000002487,10090.ENSMUSP00000004990,10090.ENSMUSP00000020118,10090.ENSMUSP00000051619,10090.ENSMUSP00000065983,10090.ENSMUSP00000096203	Spi1,Braf,Mapk14,Dusp6,Mapk3,Mapk1,Tet2
Monarch MPO	MP:0001602	Impaired myelopoiesis	2	13	2.04	0.0103	10090.ENSMUSP00000002180,10090.ENSMUSP00000103782	Spi1,Etv2
Monarch MPO	MP:0000267	Abnormal heart development	5	391	0.96	0.0108	10090.ENSMUSP00000002487,10090.ENSMUSP00000004990,10090.ENSMUSP00000020118,10090.ENSMUSP00000022709,10090.ENSMUSP00000103782	Braf,Mapk14,Dusp6,Spry2,Etv2
Monarch MPO	MP:0002435	Abnormal effector t cell morphology	6	626	0.83	0.011	10090.ENSMUSP00000002180,10090.ENSMUSP00000021674,10090.ENSMUSP00000033930,10090.ENSMUSP00000034534,10090.ENSMUSP00000065983,10090.ENSMUSP00000110608	Spi1,Fos,Dusp4,Ets1,Mapk1,Elf4
Monarch MPO	MP:0008762	Embryonic lethality	10	1944	0.56	0.0114	10090.ENSMUSP00000002487,10090.ENSMUSP00000004990,10090.ENSMUSP00000023612,10090.ENSMUSP00000056752,10090.ENSMUSP00000064680,10090.ENSMUSP00000065983,10090.ENSMUSP00000102711,10090.ENSMUSP00000103782,10090.ENSMUSP00000105396,10090.ENSMUSP00000133279	Braf,Mapk14,Ets2,Fgf4,Junb,Mapk1,Jun,Etv2,Dnmt3b,Tet1
Monarch MPO	MP:0004564	Enlarged myocardial fiber	3	82	1.42	0.0116	10090.ENSMUSP00000002487,10090.ENSMUSP00000004990,10090.ENSMUSP00000020118	Braf,Mapk14,Dusp6
Monarch MPO	MP:0002062	Abnormal associative learning	5	400	0.95	0.0117	10090.ENSMUSP00000002487,10090.ENSMUSP00000004990,10090.ENSMUSP00000021674,10090.ENSMUSP00000051619,10090.ENSMUSP00000065983	Braf,Mapk14,Fos,Mapk3,Mapk1
Monarch MPO	MP:0001586	Abnormal erythrocyte cell number	5	407	0.94	0.0125	10090.ENSMUSP00000002180,10090.ENSMUSP00000002487,10090.ENSMUSP00000021674,10090.ENSMUSP00000096203,10090.ENSMUSP00000103782	Spi1,Braf,Fos,Tet2,Etv2
Monarch MPO	MP:0000405	Abnormal auchene hair morphology	2	15	1.98	0.0127	10090.ENSMUSP00000023612,10090.ENSMUSP00000031280	Ets2,Fgf5
Monarch MPO	MP:0008705	Increased interleukin-6 secretion	3	86	1.39	0.0129	10090.ENSMUSP00000021674,10090.ENSMUSP00000033930,10090.ENSMUSP00000064680	Fos,Dusp4,Junb
Monarch MPO	MP:0008948	Decreased neuron number	5	417	0.93	0.0137	10090.ENSMUSP00000002487,10090.ENSMUSP00000017868,10090.ENSMUSP00000020991,10090.ENSMUSP00000021674,10090.ENSMUSP00000093442	Braf,Etv4,Dnmt3a,Fos,Etv1
Monarch MPO	MP:0002445	Abnormal mononuclear cell differentiation	2	16	1.95	0.0139	10090.ENSMUSP00000002180,10090.ENSMUSP00000096203	Spi1,Tet2
Monarch MPO	MP:0004083	Polysyndactyly	2	16	1.95	0.0139	10090.ENSMUSP00000025295,10090.ENSMUSP00000056752	Spry4,Fgf4
Monarch MPO	MP:0006043	Decreased apoptosis	4	227	1.1	0.0139	10090.ENSMUSP00000021674,10090.ENSMUSP00000033930,10090.ENSMUSP00000034534,10090.ENSMUSP00000102711	Fos,Dusp4,Ets1,Jun
Monarch MPO	MP:0010274	Increased organ/body region tumor incidence	5	421	0.93	0.0139	10090.ENSMUSP00000002180,10090.ENSMUSP00000002487,10090.ENSMUSP00000004990,10090.ENSMUSP00000022709,10090.ENSMUSP00000023612	Spi1,Braf,Mapk14,Spry2,Ets2
Monarch MPO	MP:0005389	Reproductive system phenotype	11	2455	0.5	0.0154	10090.ENSMUSP00000002487,10090.ENSMUSP00000009550,10090.ENSMUSP00000017868,10090.ENSMUSP00000020991,10090.ENSMUSP00000021674,10090.ENSMUSP00000056752,10090.ENSMUSP00000065983,10090.ENSMUSP00000087049,10090.ENSMUSP00000094326,10090.ENSMUSP00000105396,10090.ENSMUSP00000133279	Braf,Elk1,Etv4,Dnmt3a,Fos,Fgf4,Mapk1,Tet3,Map3k2,Dnmt3b,Tet1
Monarch MPO	MP:0002723	Abnormal immune serum protein physiology	7	970	0.71	0.0156	10090.ENSMUSP00000002487,10090.ENSMUSP00000004990,10090.ENSMUSP00000021674,10090.ENSMUSP00000033930,10090.ENSMUSP00000051619,10090.ENSMUSP00000064680,10090.ENSMUSP00000102711	Braf,Mapk14,Fos,Dusp4,Mapk3,Junb,Jun
Monarch MPO	MP:0003229	Abnormal vitelline vasculature morphology	4	237	1.08	0.0158	10090.ENSMUSP00000002487,10090.ENSMUSP00000023612,10090.ENSMUSP00000102711,10090.ENSMUSP00000103782	Braf,Ets2,Jun,Etv2
Monarch MPO	MP:0008073	Abnormal cd4-positive, alpha beta t cell number	5	437	0.91	0.0158	10090.ENSMUSP00000002180,10090.ENSMUSP00000021674,10090.ENSMUSP00000033930,10090.ENSMUSP00000034534,10090.ENSMUSP00000065983	Spi1,Fos,Dusp4,Ets1,Mapk1
Monarch MPO	MP:0000397	Abnormal guard hair morphology	2	18	1.9	0.0161	10090.ENSMUSP00000023612,10090.ENSMUSP00000031280	Ets2,Fgf5
Monarch MPO	MP:0000601	Small liver	4	239	1.08	0.0161	10090.ENSMUSP00000002487,10090.ENSMUSP00000004990,10090.ENSMUSP00000102711,10090.ENSMUSP00000105396	Braf,Mapk14,Jun,Dnmt3b
Monarch MPO	MP:0004848	Abnormal liver size	5	449	0.9	0.0173	10090.ENSMUSP00000002180,10090.ENSMUSP00000002487,10090.ENSMUSP00000004990,10090.ENSMUSP00000102711,10090.ENSMUSP00000105396	Spi1,Braf,Mapk14,Jun,Dnmt3b
Monarch MPO	MP:0001468	Abnormal temporal memory	4	247	1.06	0.0176	10090.ENSMUSP00000002487,10090.ENSMUSP00000021674,10090.ENSMUSP00000065983,10090.ENSMUSP00000133279	Braf,Fos,Mapk1,Tet1
Monarch MPO	MP:0004484	Abnormal response of heart to induced stress	3	101	1.32	0.018	10090.ENSMUSP00000004990,10090.ENSMUSP00000020118,10090.ENSMUSP00000094326	Mapk14,Dusp6,Map3k2
Monarch MPO	MP:0001510	Abnormal coat appearance	5	458	0.89	0.0184	10090.ENSMUSP00000002487,10090.ENSMUSP00000009550,10090.ENSMUSP00000031280,10090.ENSMUSP00000034534,10090.ENSMUSP00000133279	Braf,Elk1,Fgf5,Ets1,Tet1
Monarch MPO	MP:0001633	Poor circulation	2	20	1.85	0.0185	10090.ENSMUSP00000002487,10090.ENSMUSP00000004990	Braf,Mapk14
Monarch MPO	MP:0005406	Abnormal heart size	6	732	0.77	0.0207	10090.ENSMUSP00000002487,10090.ENSMUSP00000004990,10090.ENSMUSP00000020118,10090.ENSMUSP00000036076,10090.ENSMUSP00000051619,10090.ENSMUSP00000065983	Braf,Mapk14,Dusp6,Il17rd,Mapk3,Mapk1
Monarch MPO	MP:0002110	Abnormal digit morphology	3	112	1.28	0.0232	10090.ENSMUSP00000017868,10090.ENSMUSP00000025295,10090.ENSMUSP00000056752	Etv4,Spry4,Fgf4
Monarch MPO	MP:0003861	Abnormal nervous system development	7	1059	0.67	0.0235	10090.ENSMUSP00000002487,10090.ENSMUSP00000064680,10090.ENSMUSP00000065983,10090.ENSMUSP00000093442,10090.ENSMUSP00000102711,10090.ENSMUSP00000105396,10090.ENSMUSP00000133279	Braf,Junb,Mapk1,Etv1,Jun,Dnmt3b,Tet1
Monarch MPO	MP:0005376	Homeostasis/metabolism phenotype	16	5127	0.35	0.0235	10090.ENSMUSP00000002180,10090.ENSMUSP00000002487,10090.ENSMUSP00000004990,10090.ENSMUSP00000008542,10090.ENSMUSP00000020118,10090.ENSMUSP00000020991,10090.ENSMUSP00000021674,10090.ENSMUSP00000025295,10090.ENSMUSP00000033665,10090.ENSMUSP00000033930,10090.ENSMUSP00000064680,10090.ENSMUSP00000065983,10090.ENSMUSP00000094326,10090.ENSMUSP00000102711,10090.ENSMUSP00000105396,10090.ENSMUSP00000133279	Spi1,Braf,Mapk14,Elk3,Dusp6,Dnmt3a,Fos,Spry4,Map3k15,Dusp4,Junb,Mapk1,Map3k2,Jun,Dnmt3b,Tet1
Monarch MPO	MP:0001463	Abnormal spatial learning	4	272	1.02	0.0236	10090.ENSMUSP00000002487,10090.ENSMUSP00000021674,10090.ENSMUSP00000065983,10090.ENSMUSP00000133279	Braf,Fos,Mapk1,Tet1
Monarch MPO	MP:0002109	Abnormal limb morphology	5	498	0.85	0.0255	10090.ENSMUSP00000017868,10090.ENSMUSP00000025295,10090.ENSMUSP00000056752,10090.ENSMUSP00000102711,10090.ENSMUSP00000105396	Etv4,Spry4,Fgf4,Jun,Dnmt3b
Monarch MPO	MP:0008075	Decreased cd4-positive, alpha beta t cell number	4	278	1.01	0.0255	10090.ENSMUSP00000002180,10090.ENSMUSP00000021674,10090.ENSMUSP00000034534,10090.ENSMUSP00000065983	Spi1,Fos,Ets1,Mapk1
Monarch MPO	MP:0011090	Perinatal lethality, incomplete penetrance	4	281	1.01	0.0263	10090.ENSMUSP00000021674,10090.ENSMUSP00000034534,10090.ENSMUSP00000065983,10090.ENSMUSP00000102711	Fos,Ets1,Mapk1,Jun
Monarch MPO	MP:0002398	Abnormal bone marrow cell morphology/development	5	507	0.85	0.0273	10090.ENSMUSP00000002180,10090.ENSMUSP00000002487,10090.ENSMUSP00000020991,10090.ENSMUSP00000096203,10090.ENSMUSP00000103782	Spi1,Braf,Dnmt3a,Tet2,Etv2
Monarch MPO	MP:0005388	Respiratory system phenotype	7	1092	0.66	0.0273	10090.ENSMUSP00000002487,10090.ENSMUSP00000004990,10090.ENSMUSP00000008542,10090.ENSMUSP00000022709,10090.ENSMUSP00000025295,10090.ENSMUSP00000056752,10090.ENSMUSP00000102711	Braf,Mapk14,Elk3,Spry2,Spry4,Fgf4,Jun
Monarch MPO	MP:0003884	Decreased macrophage cell number	3	122	1.24	0.0283	10090.ENSMUSP00000002180,10090.ENSMUSP00000021674,10090.ENSMUSP00000064680	Spi1,Fos,Junb
Monarch MPO	MP:0008932	Abnormal embryonic tissue physiology	4	289	0.99	0.0286	10090.ENSMUSP00000004990,10090.ENSMUSP00000056752,10090.ENSMUSP00000102711,10090.ENSMUSP00000103782	Mapk14,Fgf4,Jun,Etv2
Monarch MPO	MP:0011704	Decreased fibroblast proliferation	3	123	1.24	0.0287	10090.ENSMUSP00000051619,10090.ENSMUSP00000065983,10090.ENSMUSP00000102711	Mapk3,Mapk1,Jun
Monarch MPO	MP:0013658	Abnormal myeloid cell morphology	9	1838	0.54	0.0287	10090.ENSMUSP00000002180,10090.ENSMUSP00000002487,10090.ENSMUSP00000004990,10090.ENSMUSP00000008542,10090.ENSMUSP00000021674,10090.ENSMUSP00000064680,10090.ENSMUSP00000096203,10090.ENSMUSP00000102711,10090.ENSMUSP00000103782	Spi1,Braf,Mapk14,Elk3,Fos,Junb,Tet2,Jun,Etv2
Monarch MPO	MP:0002875	Decreased erythrocyte cell number	4	292	0.99	0.0293	10090.ENSMUSP00000002180,10090.ENSMUSP00000002487,10090.ENSMUSP00000096203,10090.ENSMUSP00000103782	Spi1,Braf,Tet2,Etv2
Monarch MPO	MP:0000402	Abnormal zigzag hair morphology	2	27	1.72	0.0295	10090.ENSMUSP00000023612,10090.ENSMUSP00000031280	Ets2,Fgf5
Monarch MPO	MP:0002356	Abnormal spleen red pulp morphology	3	127	1.23	0.0307	10090.ENSMUSP00000002180,10090.ENSMUSP00000034534,10090.ENSMUSP00000096203	Spi1,Ets1,Tet2
Monarch MPO	MP:0000689	Abnormal spleen morphology	6	809	0.72	0.0317	10090.ENSMUSP00000002180,10090.ENSMUSP00000002487,10090.ENSMUSP00000020118,10090.ENSMUSP00000021674,10090.ENSMUSP00000034534,10090.ENSMUSP00000096203	Spi1,Braf,Dusp6,Fos,Ets1,Tet2
Monarch MPO	MP:0001601	Abnormal myelopoiesis	3	130	1.22	0.0321	10090.ENSMUSP00000002180,10090.ENSMUSP00000096203,10090.ENSMUSP00000103782	Spi1,Tet2,Etv2
Monarch MPO	MP:0011085	Postnatal lethality, complete penetrance	5	532	0.83	0.0321	10090.ENSMUSP00000002180,10090.ENSMUSP00000002487,10090.ENSMUSP00000020991,10090.ENSMUSP00000102711,10090.ENSMUSP00000105396	Spi1,Braf,Dnmt3a,Jun,Dnmt3b
Monarch MPO	MP:0000165	Abnormal long bone hypertrophic chondrocyte zone	3	131	1.21	0.0325	10090.ENSMUSP00000004990,10090.ENSMUSP00000020118,10090.ENSMUSP00000021674	Mapk14,Dusp6,Fos
Monarch MPO	MP:0005348	Increased t cell proliferation	3	131	1.21	0.0325	10090.ENSMUSP00000033930,10090.ENSMUSP00000094326,10090.ENSMUSP00000110608	Dusp4,Map3k2,Elf4
Monarch MPO	MP:0004592	Small mandible	3	133	1.21	0.0336	10090.ENSMUSP00000002487,10090.ENSMUSP00000022709,10090.ENSMUSP00000065983	Braf,Spry2,Mapk1
Monarch MPO	MP:0002882	Abnormal neuron morphology	8	1522	0.57	0.0361	10090.ENSMUSP00000002487,10090.ENSMUSP00000017868,10090.ENSMUSP00000020991,10090.ENSMUSP00000021674,10090.ENSMUSP00000022709,10090.ENSMUSP00000065983,10090.ENSMUSP00000093442,10090.ENSMUSP00000133279	Braf,Etv4,Dnmt3a,Fos,Spry2,Mapk1,Etv1,Tet1
Monarch MPO	MP:0000245	Abnormal erythropoiesis	3	139	1.19	0.0378	10090.ENSMUSP00000002180,10090.ENSMUSP00000004990,10090.ENSMUSP00000096203	Spi1,Mapk14,Tet2
Monarch MPO	MP:0002620	Abnormal monocyte morphology	2	32	1.65	0.0382	10090.ENSMUSP00000002180,10090.ENSMUSP00000096203	Spi1,Tet2
Monarch MPO	MP:0011088	Neonatal lethality, incomplete penetrance	4	320	0.95	0.0382	10090.ENSMUSP00000021674,10090.ENSMUSP00000096203,10090.ENSMUSP00000102711,10090.ENSMUSP00000105396	Fos,Tet2,Jun,Dnmt3b
Monarch MPO	MP:0005028	Abnormal trophectoderm morphology	3	141	1.18	0.0388	10090.ENSMUSP00000004990,10090.ENSMUSP00000023612,10090.ENSMUSP00000065983	Mapk14,Ets2,Mapk1
Monarch MPO	MP:0004924	Abnormal behavior	14	4315	0.36	0.0394	10090.ENSMUSP00000002487,10090.ENSMUSP00000004990,10090.ENSMUSP00000008542,10090.ENSMUSP00000009550,10090.ENSMUSP00000017868,10090.ENSMUSP00000020991,10090.ENSMUSP00000021674,10090.ENSMUSP00000025295,10090.ENSMUSP00000051619,10090.ENSMUSP00000056752,10090.ENSMUSP00000065983,10090.ENSMUSP00000093442,10090.ENSMUSP00000102711,10090.ENSMUSP00000133279	Braf,Mapk14,Elk3,Elk1,Etv4,Dnmt3a,Fos,Spry4,Mapk3,Fgf4,Mapk1,Etv1,Jun,Tet1
Monarch MPO	MP:0000452	Abnormal mouth morphology	4	324	0.94	0.0395	10090.ENSMUSP00000002487,10090.ENSMUSP00000021674,10090.ENSMUSP00000022709,10090.ENSMUSP00000065983	Braf,Fos,Spry2,Mapk1
Monarch MPO	MP:0004179	Transmission ratio distortion	2	33	1.63	0.0396	10090.ENSMUSP00000021674,10090.ENSMUSP00000065983	Fos,Mapk1
Monarch MPO	MP:0009937	Abnormal neuron differentiation	4	330	0.94	0.0419	10090.ENSMUSP00000002487,10090.ENSMUSP00000065983,10090.ENSMUSP00000093442,10090.ENSMUSP00000133279	Braf,Mapk1,Etv1,Tet1
Monarch MPO	MP:0009541	Increased thymocyte apoptosis	2	35	1.61	0.0439	10090.ENSMUSP00000002487,10090.ENSMUSP00000105396	Braf,Dnmt3b
Monarch MPO	MP:0011087	Neonatal lethality, complete penetrance	5	584	0.78	0.045	10090.ENSMUSP00000002180,10090.ENSMUSP00000002487,10090.ENSMUSP00000065983,10090.ENSMUSP00000102711,10090.ENSMUSP00000105396	Spi1,Braf,Mapk1,Jun,Dnmt3b
Monarch MPO	MP:0001473	Reduced long term potentiation	3	151	1.15	0.0458	10090.ENSMUSP00000002487,10090.ENSMUSP00000021674,10090.ENSMUSP00000051619	Braf,Fos,Mapk3
Monarch MPO	MP:0002220	Large lymphoid organs	2	36	1.6	0.0458	10090.ENSMUSP00000002487,10090.ENSMUSP00000110608	Braf,Elf4
Monarch MPO	MP:0003038	Decreased myocardial infarct size	2	36	1.6	0.0458	10090.ENSMUSP00000004990,10090.ENSMUSP00000020118	Mapk14,Dusp6
Monarch MPO	MP:0004486	Decreased response of heart to induced stress	2	36	1.6	0.0458	10090.ENSMUSP00000020118,10090.ENSMUSP00000094326	Dusp6,Map3k2
Monarch MPO	MP:0002414	Abnormal myeloblast morphology/development	3	153	1.14	0.0465	10090.ENSMUSP00000002180,10090.ENSMUSP00000096203,10090.ENSMUSP00000103782	Spi1,Tet2,Etv2
Monarch MPO	MP:0002048	Increased lung adenoma incidence	2	37	1.58	0.0472	10090.ENSMUSP00000002487,10090.ENSMUSP00000004990	Braf,Mapk14
Monarch MPO	MP:0002100	Abnormal tooth morphology	3	156	1.14	0.0484	10090.ENSMUSP00000002487,10090.ENSMUSP00000021674,10090.ENSMUSP00000022709	Braf,Fos,Spry2
Monarch MPO	MP:0000163	Abnormal cartilage morphology	4	351	0.91	0.0488	10090.ENSMUSP00000004990,10090.ENSMUSP00000020118,10090.ENSMUSP00000021674,10090.ENSMUSP00000065983	Mapk14,Dusp6,Fos,Mapk1
Monarch MPO	MP:0001052	Abnormal innervation pattern to muscle	2	38	1.57	0.0488	10090.ENSMUSP00000017868,10090.ENSMUSP00000093442	Etv4,Etv1
Monarch MPO	MP:0002972	Abnormal cardiac muscle contractility	4	350	0.91	0.0488	10090.ENSMUSP00000002487,10090.ENSMUSP00000004990,10090.ENSMUSP00000020118,10090.ENSMUSP00000065983	Braf,Mapk14,Dusp6,Mapk1
Monarch MPO	MP:0005032	Abnormal ectoplacental cone morphology	2	38	1.57	0.0488	10090.ENSMUSP00000023612,10090.ENSMUSP00000065983	Ets2,Mapk1
Monarch MPO	MP:0001698	Decreased embryo size	5	608	0.77	0.0497	10090.ENSMUSP00000002487,10090.ENSMUSP00000023612,10090.ENSMUSP00000065983,10090.ENSMUSP00000103782,10090.ENSMUSP00000105396	Braf,Ets2,Mapk1,Etv2,Dnmt3b
Monarch MPO	MP:0005091	Increased double-positive t cell number	2	39	1.56	0.0497	10090.ENSMUSP00000034534,10090.ENSMUSP00000065983	Ets1,Mapk1
Monarch MPO	MP:0013561	Abnormal endocrine gland physiology	4	355	0.9	0.0499	10090.ENSMUSP00000002487,10090.ENSMUSP00000004990,10090.ENSMUSP00000034534,10090.ENSMUSP00000105396	Braf,Mapk14,Ets1,Dnmt3b
TISSUES	BTO:0000174	Embryonic structure	14	1823	0.74	0.00014	10090.ENSMUSP00000004990,10090.ENSMUSP00000008542,10090.ENSMUSP00000020991,10090.ENSMUSP00000031280,10090.ENSMUSP00000051619,10090.ENSMUSP00000056752,10090.ENSMUSP00000064680,10090.ENSMUSP00000065983,10090.ENSMUSP00000087049,10090.ENSMUSP00000093442,10090.ENSMUSP00000102711,10090.ENSMUSP00000103782,10090.ENSMUSP00000105396,10090.ENSMUSP00000133279	Mapk14,Elk3,Dnmt3a,Fgf5,Mapk3,Fgf4,Junb,Mapk1,Tet3,Etv1,Jun,Etv2,Dnmt3b,Tet1
TISSUES	BTO:0000379	Embryo	13	1528	0.78	0.00014	10090.ENSMUSP00000004990,10090.ENSMUSP00000008542,10090.ENSMUSP00000020991,10090.ENSMUSP00000051619,10090.ENSMUSP00000056752,10090.ENSMUSP00000064680,10090.ENSMUSP00000065983,10090.ENSMUSP00000087049,10090.ENSMUSP00000093442,10090.ENSMUSP00000102711,10090.ENSMUSP00000103782,10090.ENSMUSP00000105396,10090.ENSMUSP00000133279	Mapk14,Elk3,Dnmt3a,Mapk3,Fgf4,Junb,Mapk1,Tet3,Etv1,Jun,Etv2,Dnmt3b,Tet1
TISSUES	BTO:0005810	Immune system	13	2165	0.63	0.0021	10090.ENSMUSP00000002180,10090.ENSMUSP00000004990,10090.ENSMUSP00000020991,10090.ENSMUSP00000021674,10090.ENSMUSP00000023612,10090.ENSMUSP00000034534,10090.ENSMUSP00000046515,10090.ENSMUSP00000051619,10090.ENSMUSP00000064680,10090.ENSMUSP00000094326,10090.ENSMUSP00000096203,10090.ENSMUSP00000102711,10090.ENSMUSP00000110608	Spi1,Mapk14,Dnmt3a,Fos,Ets2,Ets1,Elf1,Mapk3,Junb,Map3k2,Tet2,Jun,Elf4
TISSUES	BTO:0001489	Whole body	25	9158	0.29	0.0056	10090.ENSMUSP00000002180,10090.ENSMUSP00000002487,10090.ENSMUSP00000004990,10090.ENSMUSP00000008542,10090.ENSMUSP00000017868,10090.ENSMUSP00000020991,10090.ENSMUSP00000021674,10090.ENSMUSP00000023612,10090.ENSMUSP00000031280,10090.ENSMUSP00000034534,10090.ENSMUSP00000036076,10090.ENSMUSP00000046515,10090.ENSMUSP00000051619,10090.ENSMUSP00000056752,10090.ENSMUSP00000064680,10090.ENSMUSP00000065983…	Spi1,Braf,Mapk14,Elk3,Etv4,Dnmt3a,Fos,Ets2,Fgf5,Ets1,Il17rd,Elf1,Mapk3,Fgf4,Junb,Mapk1,Tet3,Etv1,Map3k2,Tet2,Jun,Etv2,Dnmt3b,Elf4,Tet1
TISSUES	BTO:0000570	Hematopoietic system	12	2151	0.6	0.0062	10090.ENSMUSP00000004990,10090.ENSMUSP00000020991,10090.ENSMUSP00000021674,10090.ENSMUSP00000023612,10090.ENSMUSP00000034534,10090.ENSMUSP00000046515,10090.ENSMUSP00000051619,10090.ENSMUSP00000064680,10090.ENSMUSP00000094326,10090.ENSMUSP00000096203,10090.ENSMUSP00000102711,10090.ENSMUSP00000110608	Mapk14,Dnmt3a,Fos,Ets2,Ets1,Elf1,Mapk3,Junb,Map3k2,Tet2,Jun,Elf4
TISSUES	BTO:0000801	Macrophage	5	238	1.17	0.0063	10090.ENSMUSP00000002180,10090.ENSMUSP00000004990,10090.ENSMUSP00000021674,10090.ENSMUSP00000051619,10090.ENSMUSP00000102711	Spi1,Mapk14,Fos,Mapk3,Jun
TISSUES	BTO:0001099	Blastocyst	3	39	1.74	0.0076	10090.ENSMUSP00000031280,10090.ENSMUSP00000056752,10090.ENSMUSP00000105396	Fgf5,Fgf4,Dnmt3b
TISSUES	BTO:0002130	SK-MEL cell	2	9	2.2	0.026	10090.ENSMUSP00000002487,10090.ENSMUSP00000033665	Braf,Map3k15
TISSUES	BTO:0000925	Nerve	4	204	1.14	0.0408	10090.ENSMUSP00000004990,10090.ENSMUSP00000021674,10090.ENSMUSP00000051619,10090.ENSMUSP00000102711	Mapk14,Fos,Mapk3,Jun
TISSUES	BTO:0001279	Spinal cord	4	203	1.15	0.0408	10090.ENSMUSP00000004990,10090.ENSMUSP00000021674,10090.ENSMUSP00000051619,10090.ENSMUSP00000102711	Mapk14,Fos,Mapk3,Jun
TISSUES	BTO:0004593	Epiblast	2	13	2.04	0.0408	10090.ENSMUSP00000031280,10090.ENSMUSP00000056752	Fgf5,Fgf4
COMPARTMENTS	GOCC:0005634	Nucleus	25	3784	0.67	4.22e-11	10090.ENSMUSP00000002180,10090.ENSMUSP00000002487,10090.ENSMUSP00000004990,10090.ENSMUSP00000008542,10090.ENSMUSP00000009550,10090.ENSMUSP00000017868,10090.ENSMUSP00000020118,10090.ENSMUSP00000020991,10090.ENSMUSP00000021674,10090.ENSMUSP00000023612,10090.ENSMUSP00000033930,10090.ENSMUSP00000034534,10090.ENSMUSP00000046515,10090.ENSMUSP00000051619,10090.ENSMUSP00000064680,10090.ENSMUSP00000065983…	Spi1,Braf,Mapk14,Elk3,Elk1,Etv4,Dusp6,Dnmt3a,Fos,Ets2,Dusp4,Ets1,Elf1,Mapk3,Junb,Mapk1,Tet3,Etv1,Map3k2,Tet2,Jun,Etv2,Dnmt3b,Elf4,Tet1
COMPARTMENTS	GOCC:0005654	Nucleoplasm	13	982	0.97	3.07e-07	10090.ENSMUSP00000002180,10090.ENSMUSP00000004990,10090.ENSMUSP00000020991,10090.ENSMUSP00000021674,10090.ENSMUSP00000034534,10090.ENSMUSP00000051619,10090.ENSMUSP00000065983,10090.ENSMUSP00000087049,10090.ENSMUSP00000096203,10090.ENSMUSP00000102711,10090.ENSMUSP00000105396,10090.ENSMUSP00000110608,10090.ENSMUSP00000133279	Spi1,Mapk14,Dnmt3a,Fos,Ets1,Mapk3,Mapk1,Tet3,Tet2,Jun,Dnmt3b,Elf4,Tet1
COMPARTMENTS	GOCC:0043229	Intracellular organelle	26	8073	0.36	3.24e-05	10090.ENSMUSP00000002180,10090.ENSMUSP00000002487,10090.ENSMUSP00000004990,10090.ENSMUSP00000008542,10090.ENSMUSP00000009550,10090.ENSMUSP00000017868,10090.ENSMUSP00000020118,10090.ENSMUSP00000020991,10090.ENSMUSP00000021674,10090.ENSMUSP00000022709,10090.ENSMUSP00000023612,10090.ENSMUSP00000033930,10090.ENSMUSP00000034534,10090.ENSMUSP00000046515,10090.ENSMUSP00000051619,10090.ENSMUSP00000064680…	Spi1,Braf,Mapk14,Elk3,Elk1,Etv4,Dusp6,Dnmt3a,Fos,Spry2,Ets2,Dusp4,Ets1,Elf1,Mapk3,Junb,Mapk1,Tet3,Etv1,Map3k2,Tet2,Jun,Etv2,Dnmt3b,Elf4,Tet1
COMPARTMENTS	GOCC:0005622	Intracellular	27	9943	0.29	0.00032	10090.ENSMUSP00000002180,10090.ENSMUSP00000002487,10090.ENSMUSP00000004990,10090.ENSMUSP00000008542,10090.ENSMUSP00000009550,10090.ENSMUSP00000017868,10090.ENSMUSP00000020118,10090.ENSMUSP00000020991,10090.ENSMUSP00000021674,10090.ENSMUSP00000022709,10090.ENSMUSP00000023612,10090.ENSMUSP00000025295,10090.ENSMUSP00000033930,10090.ENSMUSP00000034534,10090.ENSMUSP00000046515,10090.ENSMUSP00000051619…	Spi1,Braf,Mapk14,Elk3,Elk1,Etv4,Dusp6,Dnmt3a,Fos,Spry2,Ets2,Spry4,Dusp4,Ets1,Elf1,Mapk3,Junb,Mapk1,Tet3,Etv1,Map3k2,Tet2,Jun,Etv2,Dnmt3b,Elf4,Tet1
COMPARTMENTS	GOCC:0110165	Cellular anatomical entity	28	12108	0.22	0.0044	10090.ENSMUSP00000002180,10090.ENSMUSP00000002487,10090.ENSMUSP00000004990,10090.ENSMUSP00000008542,10090.ENSMUSP00000009550,10090.ENSMUSP00000017868,10090.ENSMUSP00000020118,10090.ENSMUSP00000020991,10090.ENSMUSP00000021674,10090.ENSMUSP00000022709,10090.ENSMUSP00000023612,10090.ENSMUSP00000025295,10090.ENSMUSP00000033930,10090.ENSMUSP00000034534,10090.ENSMUSP00000046515,10090.ENSMUSP00000051619…	Spi1,Braf,Mapk14,Elk3,Elk1,Etv4,Dusp6,Dnmt3a,Fos,Spry2,Ets2,Spry4,Dusp4,Ets1,Elf1,Mapk3,Fgf4,Junb,Mapk1,Tet3,Etv1,Map3k2,Tet2,Jun,Etv2,Dnmt3b,Elf4,Tet1
COMPARTMENTS	GOCC:0140020	DNA methyltransferase complex	2	5	2.45	0.0066	10090.ENSMUSP00000020991,10090.ENSMUSP00000105396	Dnmt3a,Dnmt3b
COMPARTMENTS	GOCC:0031143	Pseudopodium	2	13	2.04	0.0306	10090.ENSMUSP00000051619,10090.ENSMUSP00000065983	Mapk3,Mapk1
UniProt Keywords	KW-0238	DNA-binding	18	1552	0.92	9.04e-11	10090.ENSMUSP00000002180,10090.ENSMUSP00000008542,10090.ENSMUSP00000009550,10090.ENSMUSP00000017868,10090.ENSMUSP00000020991,10090.ENSMUSP00000021674,10090.ENSMUSP00000023612,10090.ENSMUSP00000034534,10090.ENSMUSP00000046515,10090.ENSMUSP00000064680,10090.ENSMUSP00000087049,10090.ENSMUSP00000093442,10090.ENSMUSP00000096203,10090.ENSMUSP00000102711,10090.ENSMUSP00000103782,10090.ENSMUSP00000105396…	Spi1,Elk3,Elk1,Etv4,Dnmt3a,Fos,Ets2,Ets1,Elf1,Junb,Tet3,Etv1,Tet2,Jun,Etv2,Dnmt3b,Elf4,Tet1
UniProt Keywords	KW-0656	Proto-oncogene	7	98	1.71	2.92e-08	10090.ENSMUSP00000002180,10090.ENSMUSP00000002487,10090.ENSMUSP00000021674,10090.ENSMUSP00000023612,10090.ENSMUSP00000034534,10090.ENSMUSP00000056752,10090.ENSMUSP00000102711	Spi1,Braf,Fos,Ets2,Ets1,Fgf4,Jun
UniProt Keywords	KW-0539	Nucleus	23	4635	0.55	6.51e-08	10090.ENSMUSP00000002180,10090.ENSMUSP00000002487,10090.ENSMUSP00000004990,10090.ENSMUSP00000008542,10090.ENSMUSP00000009550,10090.ENSMUSP00000017868,10090.ENSMUSP00000020991,10090.ENSMUSP00000021674,10090.ENSMUSP00000023612,10090.ENSMUSP00000033930,10090.ENSMUSP00000034534,10090.ENSMUSP00000046515,10090.ENSMUSP00000051619,10090.ENSMUSP00000064680,10090.ENSMUSP00000065983,10090.ENSMUSP00000087049…	Spi1,Braf,Mapk14,Elk3,Elk1,Etv4,Dnmt3a,Fos,Ets2,Dusp4,Ets1,Elf1,Mapk3,Junb,Mapk1,Tet3,Etv1,Map3k2,Jun,Etv2,Dnmt3b,Elf4,Tet1
UniProt Keywords	KW-0010	Activator	10	644	1.04	1.67e-06	10090.ENSMUSP00000002180,10090.ENSMUSP00000008542,10090.ENSMUSP00000009550,10090.ENSMUSP00000017868,10090.ENSMUSP00000046515,10090.ENSMUSP00000093442,10090.ENSMUSP00000102711,10090.ENSMUSP00000105396,10090.ENSMUSP00000110608,10090.ENSMUSP00000133279	Spi1,Elk3,Elk1,Etv4,Elf1,Etv1,Jun,Dnmt3b,Elf4,Tet1
UniProt Keywords	KW-0832	Ubl conjugation	15	2100	0.71	3.69e-06	10090.ENSMUSP00000002487,10090.ENSMUSP00000004990,10090.ENSMUSP00000008542,10090.ENSMUSP00000009550,10090.ENSMUSP00000017868,10090.ENSMUSP00000020991,10090.ENSMUSP00000021674,10090.ENSMUSP00000034534,10090.ENSMUSP00000064680,10090.ENSMUSP00000065983,10090.ENSMUSP00000087049,10090.ENSMUSP00000093442,10090.ENSMUSP00000094326,10090.ENSMUSP00000102711,10090.ENSMUSP00000105396	Braf,Mapk14,Elk3,Elk1,Etv4,Dnmt3a,Fos,Ets1,Junb,Mapk1,Tet3,Etv1,Map3k2,Jun,Dnmt3b
UniProt Keywords	KW-0805	Transcription regulation	14	1837	0.73	4.94e-06	10090.ENSMUSP00000002180,10090.ENSMUSP00000004990,10090.ENSMUSP00000008542,10090.ENSMUSP00000009550,10090.ENSMUSP00000017868,10090.ENSMUSP00000020991,10090.ENSMUSP00000023612,10090.ENSMUSP00000034534,10090.ENSMUSP00000046515,10090.ENSMUSP00000064680,10090.ENSMUSP00000093442,10090.ENSMUSP00000102711,10090.ENSMUSP00000110608,10090.ENSMUSP00000133279	Spi1,Mapk14,Elk3,Elk1,Etv4,Dnmt3a,Ets2,Ets1,Elf1,Junb,Etv1,Jun,Elf4,Tet1
UniProt Keywords	KW-1017	Isopeptide bond	12	1442	0.77	1.88e-05	10090.ENSMUSP00000002487,10090.ENSMUSP00000008542,10090.ENSMUSP00000009550,10090.ENSMUSP00000017868,10090.ENSMUSP00000020991,10090.ENSMUSP00000021674,10090.ENSMUSP00000034534,10090.ENSMUSP00000064680,10090.ENSMUSP00000087049,10090.ENSMUSP00000093442,10090.ENSMUSP00000102711,10090.ENSMUSP00000105396	Braf,Elk3,Elk1,Etv4,Dnmt3a,Fos,Ets1,Junb,Tet3,Etv1,Jun,Dnmt3b
UniProt Keywords	KW-0597	Phosphoprotein	23	7551	0.34	0.00036	10090.ENSMUSP00000002180,10090.ENSMUSP00000002487,10090.ENSMUSP00000004990,10090.ENSMUSP00000008542,10090.ENSMUSP00000009550,10090.ENSMUSP00000017868,10090.ENSMUSP00000020991,10090.ENSMUSP00000021674,10090.ENSMUSP00000023612,10090.ENSMUSP00000025295,10090.ENSMUSP00000033930,10090.ENSMUSP00000034534,10090.ENSMUSP00000046515,10090.ENSMUSP00000051619,10090.ENSMUSP00000064680,10090.ENSMUSP00000065983…	Spi1,Braf,Mapk14,Elk3,Elk1,Etv4,Dnmt3a,Fos,Ets2,Spry4,Dusp4,Ets1,Elf1,Mapk3,Junb,Mapk1,Etv1,Map3k2,Tet2,Jun,Dnmt3b,Elf4,Tet1
UniProt Keywords	KW-0723	Serine/threonine-protein kinase	6	389	1.04	0.00079	10090.ENSMUSP00000002487,10090.ENSMUSP00000004990,10090.ENSMUSP00000033665,10090.ENSMUSP00000051619,10090.ENSMUSP00000065983,10090.ENSMUSP00000094326	Braf,Mapk14,Map3k15,Mapk3,Mapk1,Map3k2
UniProt Keywords	KW-0223	Dioxygenase	3	83	1.41	0.0102	10090.ENSMUSP00000087049,10090.ENSMUSP00000096203,10090.ENSMUSP00000133279	Tet3,Tet2,Tet1
UniProt Keywords	KW-0156	Chromatin regulator	4	279	1.01	0.0246	10090.ENSMUSP00000020991,10090.ENSMUSP00000087049,10090.ENSMUSP00000096203,10090.ENSMUSP00000133279	Dnmt3a,Tet3,Tet2,Tet1
UniProt Keywords	KW-0497	Mitogen	2	36	1.6	0.0471	10090.ENSMUSP00000031280,10090.ENSMUSP00000056752	Fgf5,Fgf4
Pfam	PF00178	Ets-domain	10	26	2.44	5e-18	10090.ENSMUSP00000002180,10090.ENSMUSP00000008542,10090.ENSMUSP00000009550,10090.ENSMUSP00000017868,10090.ENSMUSP00000023612,10090.ENSMUSP00000034534,10090.ENSMUSP00000046515,10090.ENSMUSP00000093442,10090.ENSMUSP00000103782,10090.ENSMUSP00000110608	Spi1,Elk3,Elk1,Etv4,Ets2,Ets1,Elf1,Etv1,Etv2,Elf4
Pfam	PF12851	Oxygenase domain of the 2OGFeDO superfamily	3	3	2.85	8.58e-05	10090.ENSMUSP00000087049,10090.ENSMUSP00000096203,10090.ENSMUSP00000133279	Tet3,Tet2,Tet1
Pfam	PF00145	C-5 cytosine-specific DNA methylase	2	4	2.55	0.0182	10090.ENSMUSP00000020991,10090.ENSMUSP00000105396	Dnmt3a,Dnmt3b
Pfam	PF00170	bZIP transcription factor	3	34	1.8	0.0182	10090.ENSMUSP00000021674,10090.ENSMUSP00000064680,10090.ENSMUSP00000102711	Fos,Junb,Jun
Pfam	PF03131	bZIP Maf transcription factor	3	32	1.82	0.0182	10090.ENSMUSP00000021674,10090.ENSMUSP00000064680,10090.ENSMUSP00000102711	Fos,Junb,Jun
Pfam	PF03957	Jun-like transcription factor	2	3	2.68	0.0182	10090.ENSMUSP00000064680,10090.ENSMUSP00000102711	Junb,Jun
Pfam	PF04621	PEA3 subfamily ETS-domain transcription factor N terminal domain	2	3	2.68	0.0182	10090.ENSMUSP00000017868,10090.ENSMUSP00000093442	Etv4,Etv1
Pfam	PF07716	Basic region leucine zipper	3	41	1.72	0.0182	10090.ENSMUSP00000021674,10090.ENSMUSP00000064680,10090.ENSMUSP00000102711	Fos,Junb,Jun
Pfam	PF12310	Transcription factor protein N terminal	2	3	2.68	0.0182	10090.ENSMUSP00000046515,10090.ENSMUSP00000110608	Elf1,Elf4
Pfam	PF00069	Protein kinase domain	6	497	0.93	0.02	10090.ENSMUSP00000002487,10090.ENSMUSP00000004990,10090.ENSMUSP00000033665,10090.ENSMUSP00000051619,10090.ENSMUSP00000065983,10090.ENSMUSP00000094326	Braf,Mapk14,Map3k15,Mapk3,Mapk1,Map3k2
Pfam	PF05210	Sprouty protein (Spry)	2	7	2.31	0.02	10090.ENSMUSP00000022709,10090.ENSMUSP00000025295	Spry2,Spry4
Pfam	PF07714	Protein tyrosine kinase	6	492	0.94	0.02	10090.ENSMUSP00000002487,10090.ENSMUSP00000004990,10090.ENSMUSP00000033665,10090.ENSMUSP00000051619,10090.ENSMUSP00000065983,10090.ENSMUSP00000094326	Braf,Mapk14,Map3k15,Mapk3,Mapk1,Map3k2
InterPro	IPR000418	Ets domain	10	26	2.44	9.68e-18	10090.ENSMUSP00000002180,10090.ENSMUSP00000008542,10090.ENSMUSP00000009550,10090.ENSMUSP00000017868,10090.ENSMUSP00000023612,10090.ENSMUSP00000034534,10090.ENSMUSP00000046515,10090.ENSMUSP00000093442,10090.ENSMUSP00000103782,10090.ENSMUSP00000110608	Spi1,Elk3,Elk1,Etv4,Ets2,Ets1,Elf1,Etv1,Etv2,Elf4
InterPro	IPR036390	Winged helix DNA-binding domain superfamily	10	201	1.55	6.35e-10	10090.ENSMUSP00000002180,10090.ENSMUSP00000008542,10090.ENSMUSP00000009550,10090.ENSMUSP00000017868,10090.ENSMUSP00000023612,10090.ENSMUSP00000034534,10090.ENSMUSP00000046515,10090.ENSMUSP00000093442,10090.ENSMUSP00000103782,10090.ENSMUSP00000110608	Spi1,Elk3,Elk1,Etv4,Ets2,Ets1,Elf1,Etv1,Etv2,Elf4
InterPro	IPR036388	Winged helix-like DNA-binding domain superfamily	10	218	1.51	9.2e-10	10090.ENSMUSP00000002180,10090.ENSMUSP00000008542,10090.ENSMUSP00000009550,10090.ENSMUSP00000017868,10090.ENSMUSP00000023612,10090.ENSMUSP00000034534,10090.ENSMUSP00000046515,10090.ENSMUSP00000093442,10090.ENSMUSP00000103782,10090.ENSMUSP00000110608	Spi1,Elk3,Elk1,Etv4,Ets2,Ets1,Elf1,Etv1,Etv2,Elf4
InterPro	IPR024779	2OGFeDO, oxygenase domain	3	3	2.85	8.31e-05	10090.ENSMUSP00000087049,10090.ENSMUSP00000096203,10090.ENSMUSP00000133279	Tet3,Tet2,Tet1
InterPro	IPR040175	Methylcytosine dioxygenase TET1/2/3	3	3	2.85	8.31e-05	10090.ENSMUSP00000087049,10090.ENSMUSP00000096203,10090.ENSMUSP00000133279	Tet3,Tet2,Tet1
InterPro	IPR003527	Mitogen-activated protein (MAP) kinase, conserved site	3	12	2.25	0.0012	10090.ENSMUSP00000004990,10090.ENSMUSP00000051619,10090.ENSMUSP00000065983	Mapk14,Mapk3,Mapk1
InterPro	IPR008349	Mitogen-activated protein (MAP) kinase, ERK1/2	2	2	2.85	0.0109	10090.ENSMUSP00000051619,10090.ENSMUSP00000065983	Mapk3,Mapk1
InterPro	IPR016311	Transforming protein C-ets	2	2	2.85	0.0109	10090.ENSMUSP00000023612,10090.ENSMUSP00000034534	Ets2,Ets1
InterPro	IPR017441	Protein kinase, ATP binding site	6	378	1.05	0.0109	10090.ENSMUSP00000002487,10090.ENSMUSP00000004990,10090.ENSMUSP00000033665,10090.ENSMUSP00000051619,10090.ENSMUSP00000065983,10090.ENSMUSP00000094326	Braf,Mapk14,Map3k15,Mapk3,Mapk1,Map3k2
InterPro	IPR001525	C-5 cytosine methyltransferase	2	4	2.55	0.0127	10090.ENSMUSP00000020991,10090.ENSMUSP00000105396	Dnmt3a,Dnmt3b
InterPro	IPR002112	Transcription factor Jun	2	3	2.68	0.0127	10090.ENSMUSP00000064680,10090.ENSMUSP00000102711	Junb,Jun
InterPro	IPR005643	Jun-like transcription factor	2	3	2.68	0.0127	10090.ENSMUSP00000064680,10090.ENSMUSP00000102711	Junb,Jun
InterPro	IPR006715	PEA3-type ETS-domain transcription factor, N-terminal	2	3	2.68	0.0127	10090.ENSMUSP00000017868,10090.ENSMUSP00000093442	Etv4,Etv1
InterPro	IPR018117	DNA methylase, C-5 cytosine-specific, active site	2	3	2.68	0.0127	10090.ENSMUSP00000020991,10090.ENSMUSP00000105396	Dnmt3a,Dnmt3b
InterPro	IPR022084	Transcription factor Elf, N-terminal	2	3	2.68	0.0127	10090.ENSMUSP00000046515,10090.ENSMUSP00000110608	Elf1,Elf4
InterPro	IPR025766	ADD domain	2	4	2.55	0.0127	10090.ENSMUSP00000020991,10090.ENSMUSP00000105396	Dnmt3a,Dnmt3b
InterPro	IPR040552	DNMT3, cysteine rich ADD domain	2	3	2.68	0.0127	10090.ENSMUSP00000020991,10090.ENSMUSP00000105396	Dnmt3a,Dnmt3b
InterPro	IPR007875	Sprouty	2	6	2.37	0.0196	10090.ENSMUSP00000022709,10090.ENSMUSP00000025295	Spry2,Spry4
InterPro	IPR000719	Protein kinase domain	6	491	0.94	0.0202	10090.ENSMUSP00000002487,10090.ENSMUSP00000004990,10090.ENSMUSP00000033665,10090.ENSMUSP00000051619,10090.ENSMUSP00000065983,10090.ENSMUSP00000094326	Braf,Mapk14,Map3k15,Mapk3,Mapk1,Map3k2
InterPro	IPR004827	Basic-leucine zipper domain	3	53	1.6	0.022	10090.ENSMUSP00000021674,10090.ENSMUSP00000064680,10090.ENSMUSP00000102711	Fos,Junb,Jun
InterPro	IPR011009	Protein kinase-like domain superfamily	6	531	0.91	0.028	10090.ENSMUSP00000002487,10090.ENSMUSP00000004990,10090.ENSMUSP00000033665,10090.ENSMUSP00000051619,10090.ENSMUSP00000065983,10090.ENSMUSP00000094326	Braf,Mapk14,Map3k15,Mapk3,Mapk1,Map3k2
InterPro	IPR003118	Pointed domain	2	10	2.15	0.0377	10090.ENSMUSP00000023612,10090.ENSMUSP00000034534	Ets2,Ets1
InterPro	IPR008343	Mitogen-activated protein (MAP) kinase phosphatase	2	10	2.15	0.0377	10090.ENSMUSP00000020118,10090.ENSMUSP00000033930	Dusp6,Dusp4
InterPro	IPR002857	Zinc finger, CXXC-type	2	12	2.07	0.0476	10090.ENSMUSP00000087049,10090.ENSMUSP00000133279	Tet3,Tet1
SMART	SM00413	Erythroblast transformation specific domain	10	26	2.44	1.14e-18	10090.ENSMUSP00000002180,10090.ENSMUSP00000008542,10090.ENSMUSP00000009550,10090.ENSMUSP00000017868,10090.ENSMUSP00000023612,10090.ENSMUSP00000034534,10090.ENSMUSP00000046515,10090.ENSMUSP00000093442,10090.ENSMUSP00000103782,10090.ENSMUSP00000110608	Spi1,Elk3,Elk1,Etv4,Ets2,Ets1,Elf1,Etv1,Etv2,Elf4
SMART	SM01333	Oxygenase domain of the 2OGFeDO superfamily	3	3	2.85	1.95e-05	10090.ENSMUSP00000087049,10090.ENSMUSP00000096203,10090.ENSMUSP00000133279	Tet3,Tet2,Tet1
SMART	SM00338	Basic region leucin zipper	3	48	1.65	0.013	10090.ENSMUSP00000021674,10090.ENSMUSP00000064680,10090.ENSMUSP00000102711	Fos,Junb,Jun
SMART	SM00251	SAM / Pointed domain	2	10	2.15	0.0243	10090.ENSMUSP00000023612,10090.ENSMUSP00000034534	Ets2,Ets1
SMART	SM00293	Domain with conserved pwwp motif	2	13	2.04	0.0309	10090.ENSMUSP00000020991,10090.ENSMUSP00000105396	Dnmt3a,Dnmt3b
SMART	SM00442	Acidic and basic fibroblast growth factor family.	2	18	1.9	0.0464	10090.ENSMUSP00000031280,10090.ENSMUSP00000056752	Fgf5,Fgf4

## Sheet: string_MCL_clusters
#clustering method	cluster number	cluster color	gene count	protein name	protein identifier	protein description
MCL	1	Red	22	Braf	10090.ENSMUSP00000002487	B-raf proto-oncogene serine/threonine-protein kinase; Serine/threonine-protein kinase B-raf; Involved in the transduction of mitogenic signals from the cell membrane to the nucleus. May play a role in the postsynaptic responses of hippocampal neuron (By similarity)
MCL	1	Red	22	Dusp4	10090.ENSMUSP00000033930	Dual specificity protein phosphatase 4; Regulates mitogenic signal transduction by dephosphorylating both Thr and Tyr residues on MAP kinases ERK1 and ERK2; Belongs to the protein-tyrosine phosphatase family. Non-receptor class dual specificity subfamily
MCL	1	Red	22	Dusp6	10090.ENSMUSP00000020118	Dual specificity protein phosphatase 6; Inactivates MAP kinases. Has a specificity for the ERK family (By similarity). Plays an important role in alleviating acute postoperative pain. Necessary for the normal dephosphorylation of the long-lasting phosphorylated forms of spinal MAPK1/3 and MAP kinase p38 induced by peripheral surgery, which drives the resolution of acute postoperative allodynia. A…
MCL	1	Red	22	Elf1	10090.ENSMUSP00000046515	ETS-related transcription factor Elf-1; Transcription factor that activates the LYN and BLK promoters; Belongs to the ETS family
MCL	1	Red	22	Elk1	10090.ENSMUSP00000009550	ELK1, member of ETS oncogene family; ETS domain-containing protein Elk-1; Transcription factor that binds to purine-rich DNA sequences. Forms a ternary complex with SRF and the ETS and SRF motifs of the serum response element (SRE) on the promoter region of immediate early genes such as FOS and IER2 (By similarity). Induces target gene transcription upon JNK-signaling pathway stimulation (By simi…
MCL	1	Red	22	Elk3	10090.ENSMUSP00000008542	Ets domain-containing protein elk-3 (srf accessory protein 2); ETS domain-containing protein Elk-3; May be a negative regulator of transcription, but can activate transcription when coexpressed with Ras, Src or Mos. Forms a ternary complex with the serum response factor and the ETS and SRF motifs of the Fos serum response element
MCL	1	Red	22	Ets1	10090.ENSMUSP00000034534	E26 avian leukemia oncogene 1, 5' domain; Protein C-ets-1; Transcription factor. Directly controls the expression of cytokine and chemokine genes in a wide variety of different cellular contexts. May control the differentiation, survival and proliferation of lymphoid cells. May also regulate angiogenesis through regulation of expression of genes controlling endothelial cell migration and invasion…
MCL	1	Red	22	Ets2	10090.ENSMUSP00000023612	E26 avian leukemia oncogene 2, 3' domain; Protein C-ets-2; Transcription factor activating transcription. Binds specifically the GGA DNA motif in gene promoters and stimulates transcription of those genes (By similarity)
MCL	1	Red	22	Etv1	10090.ENSMUSP00000093442	ETS translocation variant 1; Transcriptional activator that binds to DNA sequences containing the consensus pentanucleotide 5'-CGGA[AT]-3'
MCL	1	Red	22	Etv4	10090.ENSMUSP00000017868	ETS translocation variant 4; Transcriptional activator that binds to the enhancer of the adenovirus E1A gene; the core-binding sequence is 5'[AC]GGA[AT]GT-3'. May play a regulatory role during embryogenesis; Belongs to the ETS family
MCL	1	Red	22	Fgf4	10090.ENSMUSP00000056752	Fibroblast growth factor 4; Plays an important role in the regulation of embryonic development, cell proliferation, and cell differentiation. Is essential for survival of the postimplantation mouse embryo. Required for normal limb and cardiac valve development during embryogenesis; Belongs to the heparin-binding growth factors family
MCL	1	Red	22	Fgf5	10090.ENSMUSP00000031280	Fibroblast growth factor 5; Plays an important role in the regulation of cell proliferation and cell differentiation. Required for normal regulation of the hair growth cycle. Functions as an inhibitor of hair elongation by promoting progression from anagen, the growth phase of the hair follicle, into catagen the apoptosis-induced regression phase (By similarity); Belongs to the heparin-binding gr…
MCL	1	Red	22	Fos	10090.ENSMUSP00000021674	Proto-oncogene c-Fos; Nuclear phosphoprotein which forms a tight but non- covalently linked complex with the JUN/AP-1 transcription factor. On TGF-beta activation, forms a multimeric SMAD3/SMAD4/JUN/FOS complex, at the AP1/SMAD-binding site to regulate TGF-beta- mediated signaling (By similarity). Has a critical function in regulating the development of cells destined to form and maintain the ske…
MCL	1	Red	22	Il17rd	10090.ENSMUSP00000036076	Interleukin-17 receptor D; Feedback inhibitor of fibroblast growth factor mediated Ras-MAPK signaling and ERK activation. May inhibit FGF-induced FGFR1 tyrosine phosphorylation. Regulates the nuclear ERK signaling pathway by spatially blocking nuclear translocation of activated ERK (By similarity). Mediates JNK activation and may be involved in apoptosis. Might have a role in the early stages of …
[truncated: 15 more rows]
